# Supplementary material for: Circulation of Dengue Virus Serotype 1 genotype V and Dengue Virus Serotype 2 genotype III in Tocantins State, Northern Brazil, 2021-2022
Source: Preprints.org preprint supplement (doi:10.20944/preprints202309.1376.v1), 2023-09-20
Supplement: Supplementary file 1 [file supplementary]

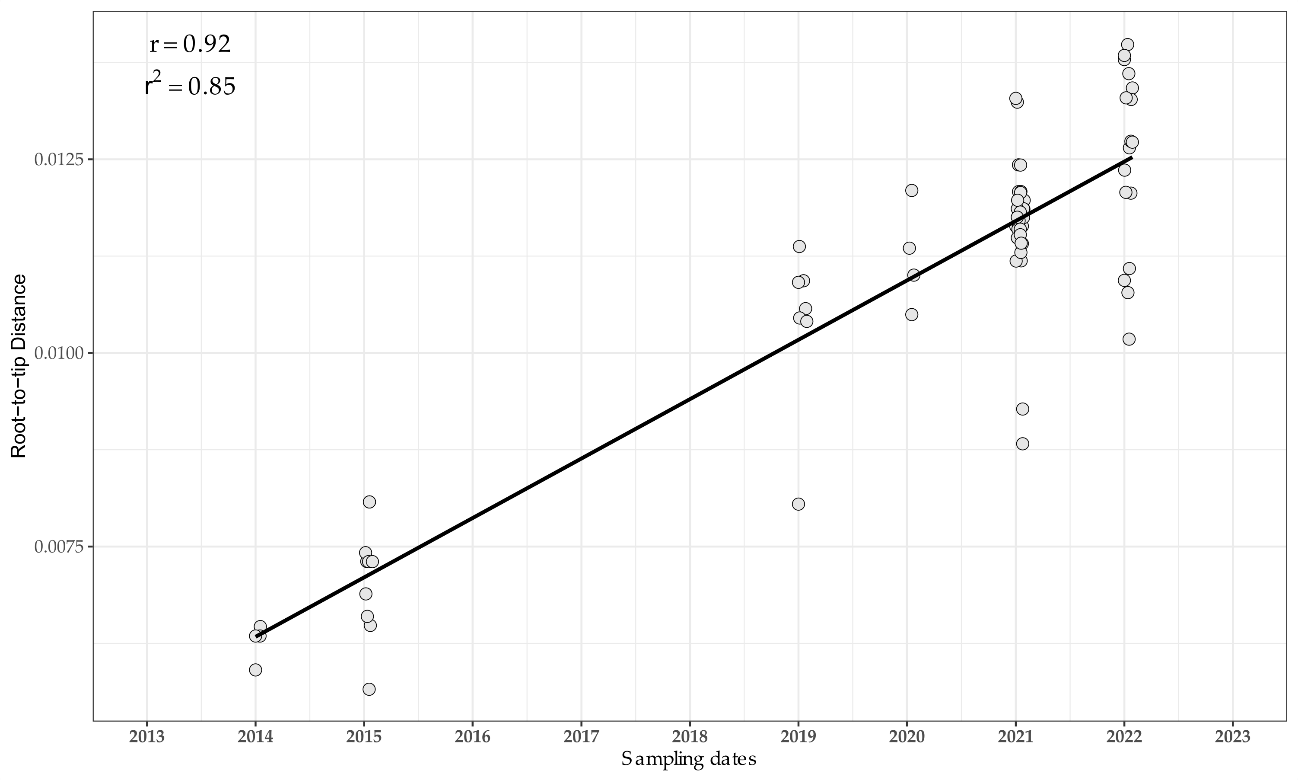


**Figure S1**. Root-to-tip regression of genetic distances and sampling dates for 76 complete and near-complete Clade I of DENV-1 Genotype V sequences sampled in Brazil, South America and North America. Correlation coefficient (r) and r squared are depicted above the graph.


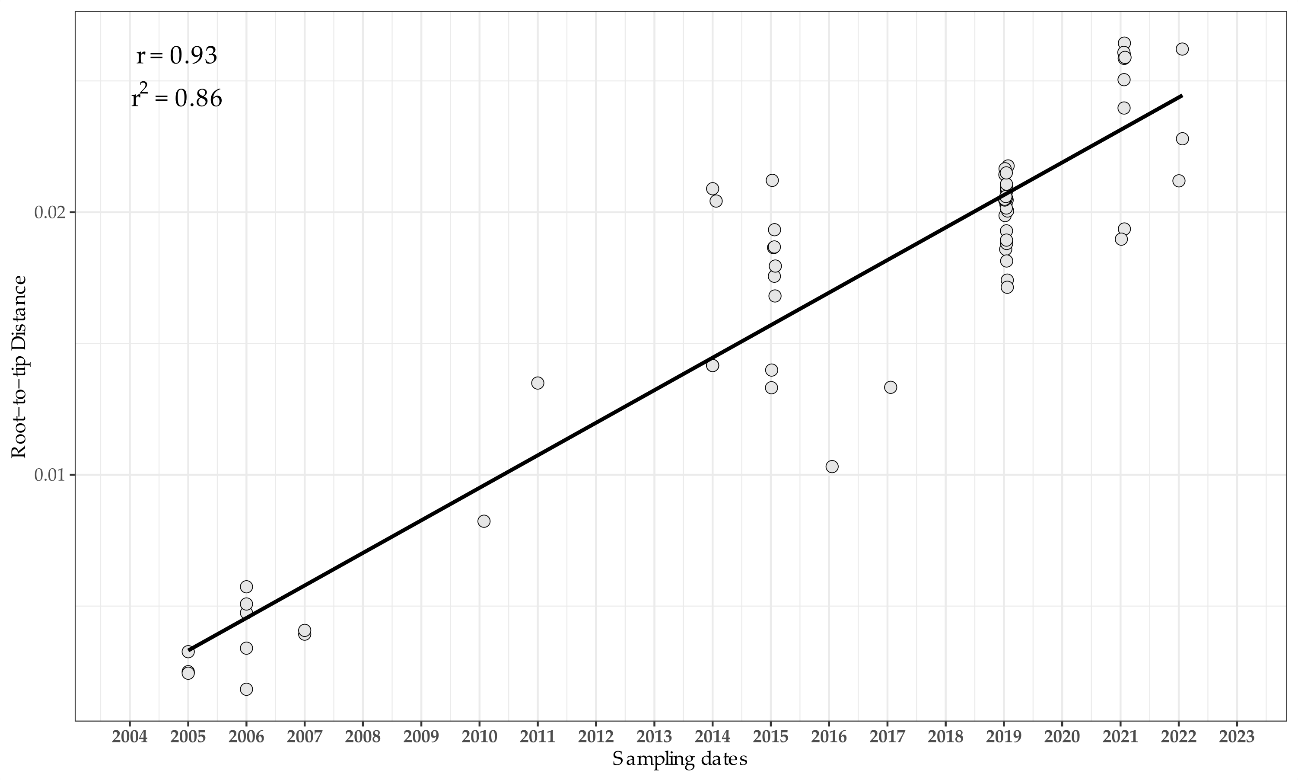


**Figure S2**. Root-to-tip regression of genetic distances and sampling dates for 63 complete and near-complete Clade II of DENV-1 Genotype V sequences sampled in Brazil and South America. Correlation coefficient (r) and r squared are depicted above the graph.


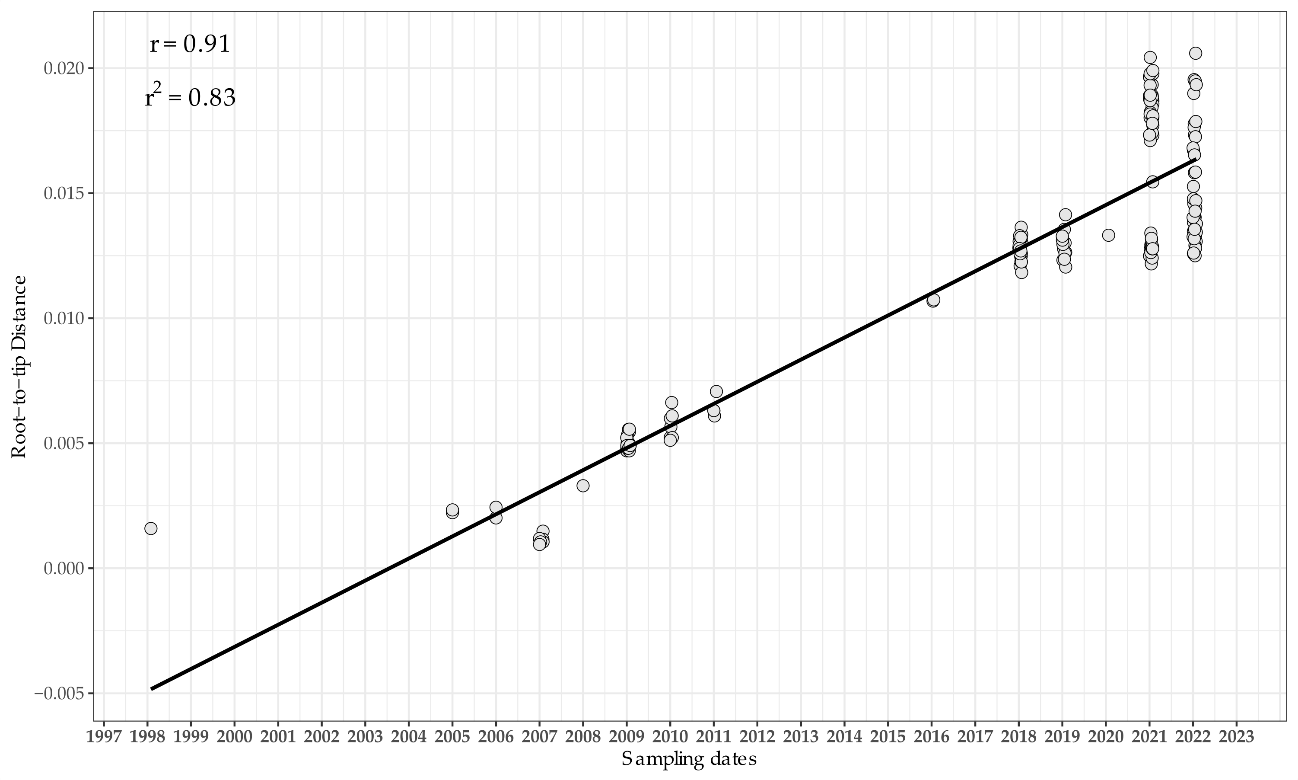


**Figure S3**. Root-to-tip regression of genetic distances and sampling dates for 170 complete and near-complete Clade III of DENV-1 Genotype V sequences sampled in Brazil, South America and North America. Correlation coefficient (r) and r squared are depicted above the graph.


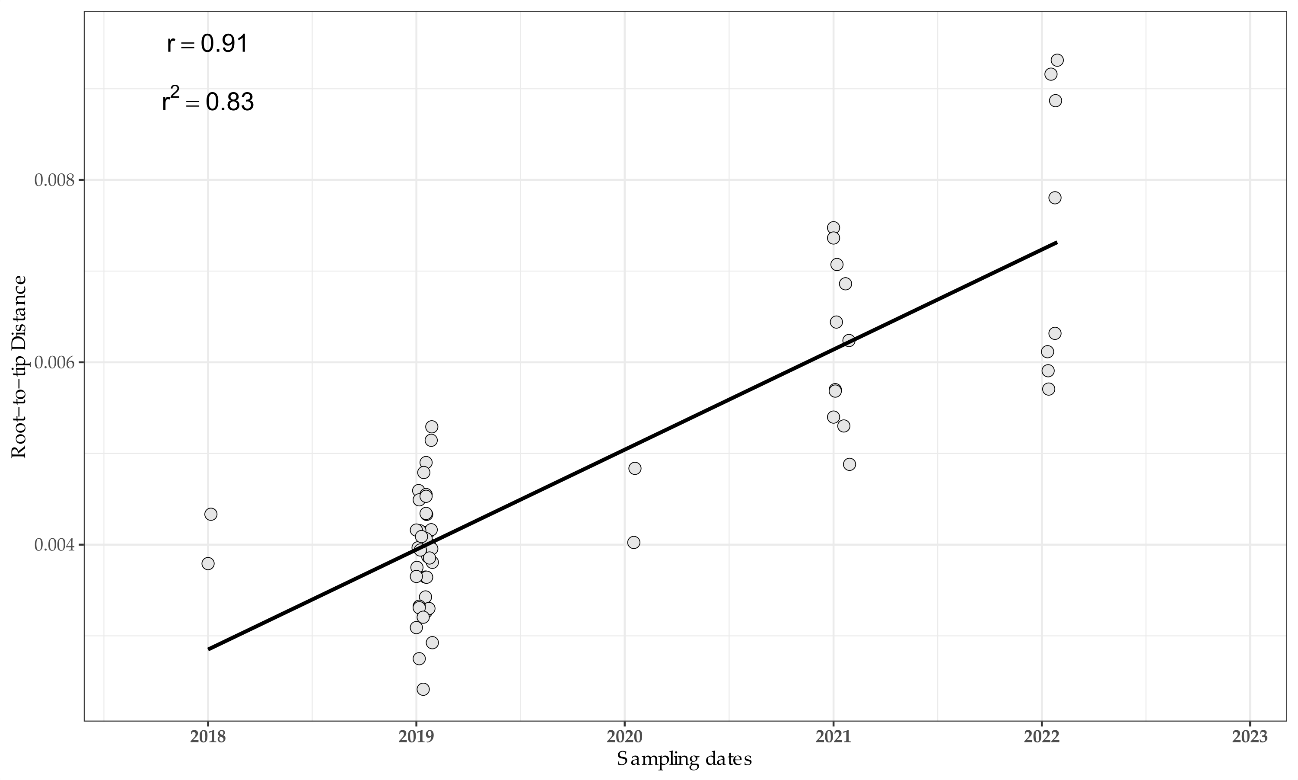


**Figure S4**. Root-to-tip regression of genetic distances and sampling dates for 63 complete and near-complete of DENV-2 sequences sampled in Brazil. Correlation coefficient (r) and r squared are depicted above the graph.
