# Supplementary material for: Circulation of Dengue Virus Serotype 1 genotype V and Dengue Virus Serotype 2 genotype III in Tocantins State, Northern Brazil, 2021-2022
Source: Preprints.org preprint supplement (doi:10.20944/preprints202309.1376.v1), 2023-09-20
Supplement: Supplementary file 3 [file Table S1.xlsx]

## Sheet: Table S1
Table S1. DENV-1 Genomes of All Known Five Genotypes (I-V) Obtained from GenBank
Accession	Submitters	Release_Date	Isolate	Species	Genus	Family	Molecule_type	Length	Sequence_Type	Nuc_Completeness	Genotype	Geo_Location	Country	Host	Isolation_Source	Collection_Date	GenBank_Title
OQ652963	Liang,C.	2023-03-23 21:00:00	DENV1_YN_RL	Dengue virus	Flavivirus	Flaviviridae	ssRNA(+)	10735	GenBank	partial	1	China	China	Homo sapiens	blood	2018-09-01	Dengue virus type I isolate DENV1_YN_RL polyprotein (POLY) gene, complete cds; and sfRNA1 lncRNA gene, complete sequence
OQ606000	Sacchi,C.T., Campos,K.R., Santos,M.B.N.	2023-03-14 21:00:00	RNA48729R	Dengue virus	Flavivirus	Flaviviridae	ssRNA(+)	10368	GenBank	partial	V	Brazil: Sao Paulo, Conchal	Brazil	Homo sapiens	blood	2022-03-03	Dengue virus type I isolate RNA48729R polyprotein (POLY) gene, complete cds; and sfRNA1 lncRNA gene, partial sequence
OQ605999	Sacchi,C.T., Campos,K.R., Santos,M.B.N.	2023-03-14 21:00:00	NS11668R	Dengue virus	Flavivirus	Flaviviridae	ssRNA(+)	10331	GenBank	partial	V	Brazil: Sao Paulo, Ferraz de Vasconcelos	Brazil	Homo sapiens	blood	2022-04-18	Dengue virus type I isolate NS11668R polyprotein (POLY) gene, complete cds; and sfRNA1 lncRNA gene, partial sequence
OQ605998	Sacchi,C.T., Campos,K.R., Santos,M.B.N.	2023-03-14 21:00:00	NS11658R	Dengue virus	Flavivirus	Flaviviridae	ssRNA(+)	10354	GenBank	partial	V	Brazil: Sao Paulo, Quintana	Brazil	Homo sapiens	blood	2022-04-13	Dengue virus type I isolate NS11658R polyprotein (POLY) gene, complete cds; and sfRNA1 lncRNA gene, partial sequence
OQ605997	Sacchi,C.T., Campos,K.R., Santos,M.B.N.	2023-03-14 21:00:00	NS11651R	Dengue virus	Flavivirus	Flaviviridae	ssRNA(+)	10353	GenBank	partial	V	Brazil: Sao Paulo, Itu	Brazil	Homo sapiens	blood	2022-04-13	Dengue virus type I isolate NS11651R polyprotein (POLY) gene, complete cds; and sfRNA1 lncRNA gene, partial sequence
OQ605996	Sacchi,C.T., Campos,K.R., Santos,M.B.N.	2023-03-14 21:00:00	NS11649R	Dengue virus	Flavivirus	Flaviviridae	ssRNA(+)	10354	GenBank	partial	V	Brazil: Sao Paulo, Buri	Brazil	Homo sapiens	blood	2022-04-16	Dengue virus type I isolate NS11649R polyprotein (POLY) gene, complete cds; and sfRNA1 lncRNA gene, partial sequence
OQ605995	Sacchi,C.T., Campos,K.R., Santos,M.B.N.	2023-03-14 21:00:00	NS11644R	Dengue virus	Flavivirus	Flaviviridae	ssRNA(+)	10354	GenBank	partial	V	Brazil: Sao Paulo, Sao Jose dos Campos	Brazil	Homo sapiens	blood	2022-04-03	Dengue virus type I isolate NS11644R polyprotein (POLY) gene, complete cds; and sfRNA1 lncRNA gene, partial sequence
OQ605994	Sacchi,C.T., Campos,K.R., Santos,M.B.N.	2023-03-14 21:00:00	NS11568R	Dengue virus	Flavivirus	Flaviviridae	ssRNA(+)	10354	GenBank	partial	V	Brazil: Sao Paulo, Sao Jose dos Campos	Brazil	Homo sapiens	blood	2022-04-03	Dengue virus type I isolate NS11568R polyprotein (POLY) gene, complete cds; and sfRNA1 lncRNA gene, partial sequence
OQ605993	Sacchi,C.T., Campos,K.R., Santos,M.B.N.	2023-03-14 21:00:00	NS11554R	Dengue virus	Flavivirus	Flaviviridae	ssRNA(+)	10357	GenBank	partial	V	Brazil: Sao Paulo, Taubate	Brazil	Homo sapiens	blood	2022-04-06	Dengue virus type I isolate NS11554R polyprotein (POLY) gene, complete cds; and sfRNA1 lncRNA gene, partial sequence
OQ605992	Sacchi,C.T., Campos,K.R., Santos,M.B.N.	2023-03-14 21:00:00	NS11546R	Dengue virus	Flavivirus	Flaviviridae	ssRNA(+)	10358	GenBank	partial	V	Brazil: Sao Paulo, Itu	Brazil	Homo sapiens	blood	2022-04-12	Dengue virus type I isolate NS11546R polyprotein (POLY) gene, complete cds; and sfRNA1 lncRNA gene, partial sequence
OQ605991	Sacchi,C.T., Campos,K.R., Santos,M.B.N.	2023-03-14 21:00:00	NS11537R	Dengue virus	Flavivirus	Flaviviridae	ssRNA(+)	10351	GenBank	partial	V	Brazil: Sao Paulo, Itu	Brazil	Homo sapiens	blood	2022-04-12	Dengue virus type I isolate NS11537R polyprotein (POLY) gene, complete cds; and sfRNA1 lncRNA gene, partial sequence
OQ605990	Sacchi,C.T., Campos,K.R., Santos,M.B.N.	2023-03-14 21:00:00	NS11534R	Dengue virus	Flavivirus	Flaviviridae	ssRNA(+)	10335	GenBank	partial	V	Brazil: Sao Paulo, Duartina	Brazil	Homo sapiens	blood	2022-04-01	Dengue virus type I isolate NS11534R polyprotein (POLY) gene, complete cds; and sfRNA1 lncRNA gene, partial sequence
OQ605989	Sacchi,C.T., Campos,K.R., Santos,M.B.N.	2023-03-14 21:00:00	NS11528R	Dengue virus	Flavivirus	Flaviviridae	ssRNA(+)	10355	GenBank	partial	V	Brazil: Sao Paulo, Rosana	Brazil	Homo sapiens	blood	2022-04-05	Dengue virus type I isolate NS11528R polyprotein (POLY) gene, complete cds; and sfRNA1 lncRNA gene, partial sequence
OQ605988	Sacchi,C.T., Campos,K.R., Santos,M.B.N.	2023-03-14 21:00:00	NS11527R	Dengue virus	Flavivirus	Flaviviridae	ssRNA(+)	10349	GenBank	partial	V	Brazil: Sao Paulo, Espirito Santo do Turvo	Brazil	Homo sapiens	blood	2022-03-30	Dengue virus type I isolate NS11527R polyprotein (POLY) gene, complete cds; and sfRNA1 lncRNA gene, partial sequence
OQ605987	Sacchi,C.T., Campos,K.R., Santos,M.B.N.	2023-03-14 21:00:00	NS11504R	Dengue virus	Flavivirus	Flaviviridae	ssRNA(+)	10581	GenBank	partial	V	Brazil: Sao Paulo, Corumbatai	Brazil	Homo sapiens	blood	2022-03-31	Dengue virus type I isolate NS11504R polyprotein (POLY) gene, complete cds; and sfRNA1 lncRNA gene, partial sequence
OQ605986	Sacchi,C.T., Campos,K.R., Santos,M.B.N.	2023-03-14 21:00:00	NS11498R	Dengue virus	Flavivirus	Flaviviridae	ssRNA(+)	10281	GenBank	partial	V	Brazil: Sao Paulo, Taubate	Brazil	Homo sapiens	blood	2022-04-04	Dengue virus type I isolate NS11498R polyprotein (POLY) gene, complete cds
OQ605985	Sacchi,C.T., Campos,K.R., Santos,M.B.N.	2023-03-14 21:00:00	NS11493R	Dengue virus	Flavivirus	Flaviviridae	ssRNA(+)	10377	GenBank	partial	V	Brazil: Sao Paulo, Taubate	Brazil	Homo sapiens	blood	2022-04-04	Dengue virus type I isolate NS11493R polyprotein (POLY) gene, complete cds; and sfRNA1 lncRNA gene, partial sequence
OQ605984	Sacchi,C.T., Campos,K.R., Santos,M.B.N.	2023-03-14 21:00:00	NS11426R	Dengue virus	Flavivirus	Flaviviridae	ssRNA(+)	10263	GenBank	partial	V	Brazil: Sao Paulo, Sao Jose dos Campos	Brazil	Homo sapiens	blood	2022-03-25	Dengue virus type I isolate NS11426R polyprotein (POLY) gene, complete cds
OQ605983	Sacchi,C.T., Campos,K.R., Santos,M.B.N.	2023-03-14 21:00:00	NS11415R	Dengue virus	Flavivirus	Flaviviridae	ssRNA(+)	10336	GenBank	partial	V	Brazil: Sao Paulo, Taubate	Brazil	Homo sapiens	blood	2022-03-27	Dengue virus type I isolate NS11415R polyprotein (POLY) gene, complete cds; and sfRNA1 lncRNA gene, partial sequence
OQ605982	Sacchi,C.T., Campos,K.R., Santos,M.B.N.	2023-03-14 21:00:00	NS11381R	Dengue virus	Flavivirus	Flaviviridae	ssRNA(+)	10331	GenBank	partial	V	Brazil: Sao Paulo, Ilhabela	Brazil	Homo sapiens	blood	2022-03-20	Dengue virus type I isolate NS11381R polyprotein (POLY) gene, complete cds; and sfRNA1 lncRNA gene, partial sequence
OQ605981	Sacchi,C.T., Campos,K.R., Santos,M.B.N.	2023-03-14 21:00:00	NS11351R	Dengue virus	Flavivirus	Flaviviridae	ssRNA(+)	10347	GenBank	partial	V	Brazil: Sao Paulo, Capivari	Brazil	Homo sapiens	blood	2022-03-17	Dengue virus type I isolate NS11351R polyprotein (POLY) gene, complete cds; and sfRNA1 lncRNA gene, partial sequence
OQ605980	Sacchi,C.T., Campos,K.R., Santos,M.B.N.	2023-03-14 21:00:00	NS11332R	Dengue virus	Flavivirus	Flaviviridae	ssRNA(+)	10263	GenBank	partial	V	Brazil: Sao Paulo, Taubate	Brazil	Homo sapiens	blood	2022-03-16	Dengue virus type I isolate NS11332R polyprotein (POLY) gene, complete cds
OQ605979	Sacchi,C.T., Campos,K.R., Santos,M.B.N.	2023-03-14 21:00:00	NS11328R	Dengue virus	Flavivirus	Flaviviridae	ssRNA(+)	10265	GenBank	partial	V	Brazil: Sao Paulo, Taubate	Brazil	Homo sapiens	blood	2022-03-19	Dengue virus type I isolate NS11328R polyprotein (POLY) gene, complete cds
OQ605978	Sacchi,C.T., Campos,K.R., Santos,M.B.N.	2023-03-14 21:00:00	NS11318R	Dengue virus	Flavivirus	Flaviviridae	ssRNA(+)	10263	GenBank	partial	V	Brazil: Sao Paulo, Sao Jose dos Campos	Brazil	Homo sapiens	blood	2022-03-19	Dengue virus type I isolate NS11318R polyprotein (POLY) gene, complete cds
OQ605977	Sacchi,C.T., Campos,K.R., Santos,M.B.N.	2023-03-14 21:00:00	NS11290R	Dengue virus	Flavivirus	Flaviviridae	ssRNA(+)	10259	GenBank	partial	V	Brazil: Sao Paulo, Louveira	Brazil	Homo sapiens	blood	2022-03-15	Dengue virus type I isolate NS11290R polyprotein (POLY) gene, complete cds
OQ445884	Santiago,G.A., Gonzalez-Morales,G., Flores,B., Charriez,K., Munoz-Jordan,J.L., Bunch,S., Cano,N., Jaber,R., Morrison,A., Panzera,C., Vergara,J., Zimler,R., Heberlein,L., Kopp,E.	2023-02-20 21:00:00	US/DB327/2022	Dengue virus	Flavivirus	Flaviviridae	ssRNA(+)	10176	GenBank	partial	V: American-African	USA: Florida	USA	Homo sapiens	blood	2022-10-01	Dengue virus type I isolate US/DB327/2022 polyprotein (POLY) gene, partial cds
OQ445883	Santiago,G.A., Gonzalez-Morales,G., Flores,B., Charriez,K., Munoz-Jordan,J.L., Bunch,S., Cano,N., Jaber,R., Morrison,A., Panzera,C., Vergara,J., Zimler,R., Heberlein,L., Kopp,E.	2023-02-20 21:00:00	US/DB326/2022	Dengue virus	Flavivirus	Flaviviridae	ssRNA(+)	10176	GenBank	partial	V: American-African	USA: Florida	USA	Homo sapiens	blood	2022-08-20	Dengue virus type I isolate US/DB326/2022 polyprotein (POLY) gene, partial cds
OQ445882	Santiago,G.A., Gonzalez-Morales,G., Flores,B., Charriez,K., Munoz-Jordan,J.L., Bunch,S., Cano,N., Jaber,R., Morrison,A., Panzera,C., Vergara,J., Zimler,R., Heberlein,L., Kopp,E.	2023-02-20 21:00:00	US/DB325/2022	Dengue virus	Flavivirus	Flaviviridae	ssRNA(+)	10176	GenBank	partial	V: American-African	USA: Florida	USA	Homo sapiens	blood	2022-08-15	Dengue virus type I isolate US/DB325/2022 polyprotein (POLY) gene, partial cds
OQ445881	Santiago,G.A., Gonzalez-Morales,G., Flores,B., Charriez,K., Munoz-Jordan,J.L., Bunch,S., Cano,N., Jaber,R., Morrison,A., Panzera,C., Vergara,J., Zimler,R., Heberlein,L., Kopp,E.	2023-02-20 21:00:00	US/DB324/2022	Dengue virus	Flavivirus	Flaviviridae	ssRNA(+)	10176	GenBank	partial	V: American-African	USA: Florida	USA	Homo sapiens	blood	2022-07-19	Dengue virus type I isolate US/DB324/2022 polyprotein (POLY) gene, partial cds
OQ445880	Santiago,G.A., Gonzalez-Morales,G., Flores,B., Charriez,K., Munoz-Jordan,J.L., Bunch,S., Cano,N., Jaber,R., Morrison,A., Panzera,C., Vergara,J., Zimler,R., Heberlein,L., Kopp,E.	2023-02-20 21:00:00	US/DB323/2022	Dengue virus	Flavivirus	Flaviviridae	ssRNA(+)	10176	GenBank	partial	V: American-African	USA: Florida	USA	Homo sapiens	blood	2022-05-18	Dengue virus type I isolate US/DB323/2022 polyprotein (POLY) gene, partial cds
OQ426756	Ashall,J., Shah,S., Biggs,J.R., Chang,R., Jafari,Y., Brady,O.J., Mai,H.K., Lien,L.T., Thai,H.D., Nhuyen,H.A.T., Anh,D., Iwasaki,C., Kitamura,N., Van Loock,M., Herrera-Taracena,G., Rasschaert,F., Van Wesenbeeck,L., Yoshida,L.-M., Hafalla,J.C.R., Hue,S., Hibberd,M.L.	2023-02-17 21:00:00	DET-P-0494-1	Dengue virus	Flavivirus	Flaviviridae	ssRNA(+)	10176	GenBank	partial		Viet Nam: Nha Trang	Viet Nam	Homo sapiens	blood	2019-04-19	Dengue virus type I isolate DET-P-0494-1 polyprotein (POLY) gene, partial cds
OQ426755	Ashall,J., Shah,S., Biggs,J.R., Chang,R., Jafari,Y., Brady,O.J., Mai,H.K., Lien,L.T., Thai,H.D., Nhuyen,H.A.T., Anh,D., Iwasaki,C., Kitamura,N., Van Loock,M., Herrera-Taracena,G., Rasschaert,F., Van Wesenbeeck,L., Yoshida,L.-M., Hafalla,J.C.R., Hue,S., Hibberd,M.L.	2023-02-17 21:00:00	DET-P-0353-1	Dengue virus	Flavivirus	Flaviviridae	ssRNA(+)	10176	GenBank	partial		Viet Nam: Nha Trang	Viet Nam	Homo sapiens	blood	2018-11-30	Dengue virus type I isolate DET-P-0353-1 polyprotein (POLY) gene, partial cds
OQ426754	Ashall,J., Shah,S., Biggs,J.R., Chang,R., Jafari,Y., Brady,O.J., Mai,H.K., Lien,L.T., Thai,H.D., Nhuyen,H.A.T., Anh,D., Iwasaki,C., Kitamura,N., Van Loock,M., Herrera-Taracena,G., Rasschaert,F., Van Wesenbeeck,L., Yoshida,L.-M., Hafalla,J.C.R., Hue,S., Hibberd,M.L.	2023-02-17 21:00:00	DET-P-0350-1	Dengue virus	Flavivirus	Flaviviridae	ssRNA(+)	10176	GenBank	partial		Viet Nam: Nha Trang	Viet Nam	Homo sapiens	blood	2018-11-30	Dengue virus type I isolate DET-P-0350-1 polyprotein (POLY) gene, partial cds
OQ426753	Ashall,J., Shah,S., Biggs,J.R., Chang,R., Jafari,Y., Brady,O.J., Mai,H.K., Lien,L.T., Thai,H.D., Nhuyen,H.A.T., Anh,D., Iwasaki,C., Kitamura,N., Van Loock,M., Herrera-Taracena,G., Rasschaert,F., Van Wesenbeeck,L., Yoshida,L.-M., Hafalla,J.C.R., Hue,S., Hibberd,M.L.	2023-02-17 21:00:00	DET-P-0346-1	Dengue virus	Flavivirus	Flaviviridae	ssRNA(+)	10176	GenBank	partial		Viet Nam: Nha Trang	Viet Nam	Homo sapiens	blood	2018-11-28	Dengue virus type I isolate DET-P-0346-1 polyprotein (POLY) gene, partial cds
OQ426752	Ashall,J., Shah,S., Biggs,J.R., Chang,R., Jafari,Y., Brady,O.J., Mai,H.K., Lien,L.T., Thai,H.D., Nhuyen,H.A.T., Anh,D., Iwasaki,C., Kitamura,N., Van Loock,M., Herrera-Taracena,G., Rasschaert,F., Van Wesenbeeck,L., Yoshida,L.-M., Hafalla,J.C.R., Hue,S., Hibberd,M.L.	2023-02-17 21:00:00	DET-P-0345-1	Dengue virus	Flavivirus	Flaviviridae	ssRNA(+)	10176	GenBank	partial		Viet Nam: Nha Trang	Viet Nam	Homo sapiens	blood	2018-11-28	Dengue virus type I isolate DET-P-0345-1 polyprotein (POLY) gene, partial cds
OQ426751	Ashall,J., Shah,S., Biggs,J.R., Chang,R., Jafari,Y., Brady,O.J., Mai,H.K., Lien,L.T., Thai,H.D., Nhuyen,H.A.T., Anh,D., Iwasaki,C., Kitamura,N., Van Loock,M., Herrera-Taracena,G., Rasschaert,F., Van Wesenbeeck,L., Yoshida,L.-M., Hafalla,J.C.R., Hue,S., Hibberd,M.L.	2023-02-17 21:00:00	DET-P-0335-1	Dengue virus	Flavivirus	Flaviviridae	ssRNA(+)	10176	GenBank	partial		Viet Nam: Nha Trang	Viet Nam	Homo sapiens	blood	2018-11-23	Dengue virus type I isolate DET-P-0335-1 polyprotein (POLY) gene, partial cds
OQ426750	Ashall,J., Shah,S., Biggs,J.R., Chang,R., Jafari,Y., Brady,O.J., Mai,H.K., Lien,L.T., Thai,H.D., Nhuyen,H.A.T., Anh,D., Iwasaki,C., Kitamura,N., Van Loock,M., Herrera-Taracena,G., Rasschaert,F., Van Wesenbeeck,L., Yoshida,L.-M., Hafalla,J.C.R., Hue,S., Hibberd,M.L.	2023-02-17 21:00:00	DET-P-0322-1	Dengue virus	Flavivirus	Flaviviridae	ssRNA(+)	10176	GenBank	partial		Viet Nam: Nha Trang	Viet Nam	Homo sapiens	blood	2018-11-19	Dengue virus type I isolate DET-P-0322-1 polyprotein (POLY) gene, partial cds
OQ426749	Ashall,J., Shah,S., Biggs,J.R., Chang,R., Jafari,Y., Brady,O.J., Mai,H.K., Lien,L.T., Thai,H.D., Nhuyen,H.A.T., Anh,D., Iwasaki,C., Kitamura,N., Van Loock,M., Herrera-Taracena,G., Rasschaert,F., Van Wesenbeeck,L., Yoshida,L.-M., Hafalla,J.C.R., Hue,S., Hibberd,M.L.	2023-02-17 21:00:00	DET-P-0308-1	Dengue virus	Flavivirus	Flaviviridae	ssRNA(+)	10176	GenBank	partial		Viet Nam: Nha Trang	Viet Nam	Homo sapiens	blood	2018-11-16	Dengue virus type I isolate DET-P-0308-1 polyprotein (POLY) gene, partial cds
OQ426748	Ashall,J., Shah,S., Biggs,J.R., Chang,R., Jafari,Y., Brady,O.J., Mai,H.K., Lien,L.T., Thai,H.D., Nhuyen,H.A.T., Anh,D., Iwasaki,C., Kitamura,N., Van Loock,M., Herrera-Taracena,G., Rasschaert,F., Van Wesenbeeck,L., Yoshida,L.-M., Hafalla,J.C.R., Hue,S., Hibberd,M.L.	2023-02-17 21:00:00	DET-P-0292-1	Dengue virus	Flavivirus	Flaviviridae	ssRNA(+)	10176	GenBank	partial		Viet Nam: Nha Trang	Viet Nam	Homo sapiens	blood	2018-11-07	Dengue virus type I isolate DET-P-0292-1 polyprotein (POLY) gene, partial cds
OQ426747	Ashall,J., Shah,S., Biggs,J.R., Chang,R., Jafari,Y., Brady,O.J., Mai,H.K., Lien,L.T., Thai,H.D., Nhuyen,H.A.T., Anh,D., Iwasaki,C., Kitamura,N., Van Loock,M., Herrera-Taracena,G., Rasschaert,F., Van Wesenbeeck,L., Yoshida,L.-M., Hafalla,J.C.R., Hue,S., Hibberd,M.L.	2023-02-17 21:00:00	DET-P-0290-1	Dengue virus	Flavivirus	Flaviviridae	ssRNA(+)	10176	GenBank	partial		Viet Nam: Nha Trang	Viet Nam	Homo sapiens	blood	2018-11-06	Dengue virus type I isolate DET-P-0290-1 polyprotein (POLY) gene, partial cds
OQ426746	Ashall,J., Shah,S., Biggs,J.R., Chang,R., Jafari,Y., Brady,O.J., Mai,H.K., Lien,L.T., Thai,H.D., Nhuyen,H.A.T., Anh,D., Iwasaki,C., Kitamura,N., Van Loock,M., Herrera-Taracena,G., Rasschaert,F., Van Wesenbeeck,L., Yoshida,L.-M., Hafalla,J.C.R., Hue,S., Hibberd,M.L.	2023-02-17 21:00:00	DET-P-0289-1	Dengue virus	Flavivirus	Flaviviridae	ssRNA(+)	10176	GenBank	partial		Viet Nam: Nha Trang	Viet Nam	Homo sapiens	blood	2018-11-02	Dengue virus type I isolate DET-P-0289-1 polyprotein (POLY) gene, partial cds
OQ426745	Ashall,J., Shah,S., Biggs,J.R., Chang,R., Jafari,Y., Brady,O.J., Mai,H.K., Lien,L.T., Thai,H.D., Nhuyen,H.A.T., Anh,D., Iwasaki,C., Kitamura,N., Van Loock,M., Herrera-Taracena,G., Rasschaert,F., Van Wesenbeeck,L., Yoshida,L.-M., Hafalla,J.C.R., Hue,S., Hibberd,M.L.	2023-02-17 21:00:00	DET-P-0285-1	Dengue virus	Flavivirus	Flaviviridae	ssRNA(+)	10176	GenBank	partial		Viet Nam: Nha Trang	Viet Nam	Homo sapiens	blood	2018-11-01	Dengue virus type I isolate DET-P-0285-1 polyprotein (POLY) gene, partial cds
OQ426744	Ashall,J., Shah,S., Biggs,J.R., Chang,R., Jafari,Y., Brady,O.J., Mai,H.K., Lien,L.T., Thai,H.D., Nhuyen,H.A.T., Anh,D., Iwasaki,C., Kitamura,N., Van Loock,M., Herrera-Taracena,G., Rasschaert,F., Van Wesenbeeck,L., Yoshida,L.-M., Hafalla,J.C.R., Hue,S., Hibberd,M.L.	2023-02-17 21:00:00	DET-P-0276-1	Dengue virus	Flavivirus	Flaviviridae	ssRNA(+)	10176	GenBank	partial		Viet Nam: Nha Trang	Viet Nam	Homo sapiens	blood	2018-10-29	Dengue virus type I isolate DET-P-0276-1 polyprotein (POLY) gene, partial cds
OQ426743	Ashall,J., Shah,S., Biggs,J.R., Chang,R., Jafari,Y., Brady,O.J., Mai,H.K., Lien,L.T., Thai,H.D., Nhuyen,H.A.T., Anh,D., Iwasaki,C., Kitamura,N., Van Loock,M., Herrera-Taracena,G., Rasschaert,F., Van Wesenbeeck,L., Yoshida,L.-M., Hafalla,J.C.R., Hue,S., Hibberd,M.L.	2023-02-17 21:00:00	DET-P-0271-1	Dengue virus	Flavivirus	Flaviviridae	ssRNA(+)	10176	GenBank	partial		Viet Nam: Nha Trang	Viet Nam	Homo sapiens	blood	2018-10-26	Dengue virus type I isolate DET-P-0271-1 polyprotein (POLY) gene, partial cds
OQ426742	Ashall,J., Shah,S., Biggs,J.R., Chang,R., Jafari,Y., Brady,O.J., Mai,H.K., Lien,L.T., Thai,H.D., Nhuyen,H.A.T., Anh,D., Iwasaki,C., Kitamura,N., Van Loock,M., Herrera-Taracena,G., Rasschaert,F., Van Wesenbeeck,L., Yoshida,L.-M., Hafalla,J.C.R., Hue,S., Hibberd,M.L.	2023-02-17 21:00:00	DET-P-0248-1	Dengue virus	Flavivirus	Flaviviridae	ssRNA(+)	10176	GenBank	partial		Viet Nam: Nha Trang	Viet Nam	Homo sapiens	blood	2018-10-19	Dengue virus type I isolate DET-P-0248-1 polyprotein (POLY) gene, partial cds
OQ426741	Ashall,J., Shah,S., Biggs,J.R., Chang,R., Jafari,Y., Brady,O.J., Mai,H.K., Lien,L.T., Thai,H.D., Nhuyen,H.A.T., Anh,D., Iwasaki,C., Kitamura,N., Van Loock,M., Herrera-Taracena,G., Rasschaert,F., Van Wesenbeeck,L., Yoshida,L.-M., Hafalla,J.C.R., Hue,S., Hibberd,M.L.	2023-02-17 21:00:00	DET-P-0237-1	Dengue virus	Flavivirus	Flaviviridae	ssRNA(+)	10176	GenBank	partial		Viet Nam: Nha Trang	Viet Nam	Homo sapiens	blood	2018-10-12	Dengue virus type I isolate DET-P-0237-1 polyprotein (POLY) gene, partial cds
OQ426740	Ashall,J., Shah,S., Biggs,J.R., Chang,R., Jafari,Y., Brady,O.J., Mai,H.K., Lien,L.T., Thai,H.D., Nhuyen,H.A.T., Anh,D., Iwasaki,C., Kitamura,N., Van Loock,M., Herrera-Taracena,G., Rasschaert,F., Van Wesenbeeck,L., Yoshida,L.-M., Hafalla,J.C.R., Hue,S., Hibberd,M.L.	2023-02-17 21:00:00	DEN-P-1211-1	Dengue virus	Flavivirus	Flaviviridae	ssRNA(+)	10176	GenBank	partial		Viet Nam: Nha Trang	Viet Nam	Homo sapiens	blood	2018-12-03	Dengue virus type I isolate DEN-P-1211-1 polyprotein (POLY) gene, partial cds
OQ426739	Ashall,J., Shah,S., Biggs,J.R., Chang,R., Jafari,Y., Brady,O.J., Mai,H.K., Lien,L.T., Thai,H.D., Nhuyen,H.A.T., Anh,D., Iwasaki,C., Kitamura,N., Van Loock,M., Herrera-Taracena,G., Rasschaert,F., Van Wesenbeeck,L., Yoshida,L.-M., Hafalla,J.C.R., Hue,S., Hibberd,M.L.	2023-02-17 21:00:00	DEN-P-1195-1	Dengue virus	Flavivirus	Flaviviridae	ssRNA(+)	10176	GenBank	partial		Viet Nam: Nha Trang	Viet Nam	Homo sapiens	blood	2018-11-30	Dengue virus type I isolate DEN-P-1195-1 polyprotein (POLY) gene, partial cds
OQ426738	Ashall,J., Shah,S., Biggs,J.R., Chang,R., Jafari,Y., Brady,O.J., Mai,H.K., Lien,L.T., Thai,H.D., Nhuyen,H.A.T., Anh,D., Iwasaki,C., Kitamura,N., Van Loock,M., Herrera-Taracena,G., Rasschaert,F., Van Wesenbeeck,L., Yoshida,L.-M., Hafalla,J.C.R., Hue,S., Hibberd,M.L.	2023-02-17 21:00:00	DEN-P-1182-1	Dengue virus	Flavivirus	Flaviviridae	ssRNA(+)	10176	GenBank	partial		Viet Nam: Nha Trang	Viet Nam	Homo sapiens	blood	2018-11-28	Dengue virus type I isolate DEN-P-1182-1 polyprotein (POLY) gene, partial cds
OQ426737	Ashall,J., Shah,S., Biggs,J.R., Chang,R., Jafari,Y., Brady,O.J., Mai,H.K., Lien,L.T., Thai,H.D., Nhuyen,H.A.T., Anh,D., Iwasaki,C., Kitamura,N., Van Loock,M., Herrera-Taracena,G., Rasschaert,F., Van Wesenbeeck,L., Yoshida,L.-M., Hafalla,J.C.R., Hue,S., Hibberd,M.L.	2023-02-17 21:00:00	DEN-P-1180-1	Dengue virus	Flavivirus	Flaviviridae	ssRNA(+)	10176	GenBank	partial		Viet Nam: Nha Trang	Viet Nam	Homo sapiens	blood	2018-11-28	Dengue virus type I isolate DEN-P-1180-1 polyprotein (POLY) gene, partial cds
OQ426736	Ashall,J., Shah,S., Biggs,J.R., Chang,R., Jafari,Y., Brady,O.J., Mai,H.K., Lien,L.T., Thai,H.D., Nhuyen,H.A.T., Anh,D., Iwasaki,C., Kitamura,N., Van Loock,M., Herrera-Taracena,G., Rasschaert,F., Van Wesenbeeck,L., Yoshida,L.-M., Hafalla,J.C.R., Hue,S., Hibberd,M.L.	2023-02-17 21:00:00	DEN-P-1170-1	Dengue virus	Flavivirus	Flaviviridae	ssRNA(+)	10176	GenBank	partial		Viet Nam: Nha Trang	Viet Nam	Homo sapiens	blood	2018-11-26	Dengue virus type I isolate DEN-P-1170-1 polyprotein (POLY) gene, partial cds
OQ426735	Ashall,J., Shah,S., Biggs,J.R., Chang,R., Jafari,Y., Brady,O.J., Mai,H.K., Lien,L.T., Thai,H.D., Nhuyen,H.A.T., Anh,D., Iwasaki,C., Kitamura,N., Van Loock,M., Herrera-Taracena,G., Rasschaert,F., Van Wesenbeeck,L., Yoshida,L.-M., Hafalla,J.C.R., Hue,S., Hibberd,M.L.	2023-02-17 21:00:00	DEN-P-1155-1	Dengue virus	Flavivirus	Flaviviridae	ssRNA(+)	10176	GenBank	partial		Viet Nam: Nha Trang	Viet Nam	Homo sapiens	blood	2018-11-22	Dengue virus type I isolate DEN-P-1155-1 polyprotein (POLY) gene, partial cds
OQ426734	Ashall,J., Shah,S., Biggs,J.R., Chang,R., Jafari,Y., Brady,O.J., Mai,H.K., Lien,L.T., Thai,H.D., Nhuyen,H.A.T., Anh,D., Iwasaki,C., Kitamura,N., Van Loock,M., Herrera-Taracena,G., Rasschaert,F., Van Wesenbeeck,L., Yoshida,L.-M., Hafalla,J.C.R., Hue,S., Hibberd,M.L.	2023-02-17 21:00:00	DEN-P-1147-1	Dengue virus	Flavivirus	Flaviviridae	ssRNA(+)	10176	GenBank	partial		Viet Nam: Nha Trang	Viet Nam	Homo sapiens	blood	2018-11-21	Dengue virus type I isolate DEN-P-1147-1 polyprotein (POLY) gene, partial cds
OQ426733	Ashall,J., Shah,S., Biggs,J.R., Chang,R., Jafari,Y., Brady,O.J., Mai,H.K., Lien,L.T., Thai,H.D., Nhuyen,H.A.T., Anh,D., Iwasaki,C., Kitamura,N., Van Loock,M., Herrera-Taracena,G., Rasschaert,F., Van Wesenbeeck,L., Yoshida,L.-M., Hafalla,J.C.R., Hue,S., Hibberd,M.L.	2023-02-17 21:00:00	DEN-P-1146-1	Dengue virus	Flavivirus	Flaviviridae	ssRNA(+)	10176	GenBank	partial		Viet Nam: Nha Trang	Viet Nam	Homo sapiens	blood	2018-11-21	Dengue virus type I isolate DEN-P-1146-1 polyprotein (POLY) gene, partial cds
OQ426732	Ashall,J., Shah,S., Biggs,J.R., Chang,R., Jafari,Y., Brady,O.J., Mai,H.K., Lien,L.T., Thai,H.D., Nhuyen,H.A.T., Anh,D., Iwasaki,C., Kitamura,N., Van Loock,M., Herrera-Taracena,G., Rasschaert,F., Van Wesenbeeck,L., Yoshida,L.-M., Hafalla,J.C.R., Hue,S., Hibberd,M.L.	2023-02-17 21:00:00	DEN-P-1135-1	Dengue virus	Flavivirus	Flaviviridae	ssRNA(+)	10176	GenBank	partial		Viet Nam: Nha Trang	Viet Nam	Homo sapiens	blood	2018-11-20	Dengue virus type I isolate DEN-P-1135-1 polyprotein (POLY) gene, partial cds
OQ426731	Ashall,J., Shah,S., Biggs,J.R., Chang,R., Jafari,Y., Brady,O.J., Mai,H.K., Lien,L.T., Thai,H.D., Nhuyen,H.A.T., Anh,D., Iwasaki,C., Kitamura,N., Van Loock,M., Herrera-Taracena,G., Rasschaert,F., Van Wesenbeeck,L., Yoshida,L.-M., Hafalla,J.C.R., Hue,S., Hibberd,M.L.	2023-02-17 21:00:00	DEN-P-1108-1	Dengue virus	Flavivirus	Flaviviridae	ssRNA(+)	10176	GenBank	partial		Viet Nam: Nha Trang	Viet Nam	Homo sapiens	blood	2018-11-15	Dengue virus type I isolate DEN-P-1108-1 polyprotein (POLY) gene, partial cds
OQ426730	Ashall,J., Shah,S., Biggs,J.R., Chang,R., Jafari,Y., Brady,O.J., Mai,H.K., Lien,L.T., Thai,H.D., Nhuyen,H.A.T., Anh,D., Iwasaki,C., Kitamura,N., Van Loock,M., Herrera-Taracena,G., Rasschaert,F., Van Wesenbeeck,L., Yoshida,L.-M., Hafalla,J.C.R., Hue,S., Hibberd,M.L.	2023-02-17 21:00:00	DEN-P-1086-1	Dengue virus	Flavivirus	Flaviviridae	ssRNA(+)	10176	GenBank	partial		Viet Nam: Nha Trang	Viet Nam	Homo sapiens	blood	2018-11-09	Dengue virus type I isolate DEN-P-1086-1 polyprotein (POLY) gene, partial cds
OQ426729	Ashall,J., Shah,S., Biggs,J.R., Chang,R., Jafari,Y., Brady,O.J., Mai,H.K., Lien,L.T., Thai,H.D., Nhuyen,H.A.T., Anh,D., Iwasaki,C., Kitamura,N., Van Loock,M., Herrera-Taracena,G., Rasschaert,F., Van Wesenbeeck,L., Yoshida,L.-M., Hafalla,J.C.R., Hue,S., Hibberd,M.L.	2023-02-17 21:00:00	DEN-P-1081-1	Dengue virus	Flavivirus	Flaviviridae	ssRNA(+)	10176	GenBank	partial		Viet Nam: Nha Trang	Viet Nam	Homo sapiens	blood	2018-11-07	Dengue virus type I isolate DEN-P-1081-1 polyprotein (POLY) gene, partial cds
OQ426728	Ashall,J., Shah,S., Biggs,J.R., Chang,R., Jafari,Y., Brady,O.J., Mai,H.K., Lien,L.T., Thai,H.D., Nhuyen,H.A.T., Anh,D., Iwasaki,C., Kitamura,N., Van Loock,M., Herrera-Taracena,G., Rasschaert,F., Van Wesenbeeck,L., Yoshida,L.-M., Hafalla,J.C.R., Hue,S., Hibberd,M.L.	2023-02-17 21:00:00	DEN-P-1067-1	Dengue virus	Flavivirus	Flaviviridae	ssRNA(+)	10176	GenBank	partial		Viet Nam: Nha Trang	Viet Nam	Homo sapiens	blood	2018-11-06	Dengue virus type I isolate DEN-P-1067-1 polyprotein (POLY) gene, partial cds
OQ426727	Ashall,J., Shah,S., Biggs,J.R., Chang,R., Jafari,Y., Brady,O.J., Mai,H.K., Lien,L.T., Thai,H.D., Nhuyen,H.A.T., Anh,D., Iwasaki,C., Kitamura,N., Van Loock,M., Herrera-Taracena,G., Rasschaert,F., Van Wesenbeeck,L., Yoshida,L.-M., Hafalla,J.C.R., Hue,S., Hibberd,M.L.	2023-02-17 21:00:00	DEN-P-1045-1	Dengue virus	Flavivirus	Flaviviridae	ssRNA(+)	10176	GenBank	partial		Viet Nam: Nha Trang	Viet Nam	Homo sapiens	blood	2018-11-01	Dengue virus type I isolate DEN-P-1045-1 polyprotein (POLY) gene, partial cds
OQ426726	Ashall,J., Shah,S., Biggs,J.R., Chang,R., Jafari,Y., Brady,O.J., Mai,H.K., Lien,L.T., Thai,H.D., Nhuyen,H.A.T., Anh,D., Iwasaki,C., Kitamura,N., Van Loock,M., Herrera-Taracena,G., Rasschaert,F., Van Wesenbeeck,L., Yoshida,L.-M., Hafalla,J.C.R., Hue,S., Hibberd,M.L.	2023-02-17 21:00:00	DEN-P-1017-1	Dengue virus	Flavivirus	Flaviviridae	ssRNA(+)	10176	GenBank	partial		Viet Nam: Nha Trang	Viet Nam	Homo sapiens	blood	2018-10-26	Dengue virus type I isolate DEN-P-1017-1 polyprotein (POLY) gene, partial cds
OQ426725	Ashall,J., Shah,S., Biggs,J.R., Chang,R., Jafari,Y., Brady,O.J., Mai,H.K., Lien,L.T., Thai,H.D., Nhuyen,H.A.T., Anh,D., Iwasaki,C., Kitamura,N., Van Loock,M., Herrera-Taracena,G., Rasschaert,F., Van Wesenbeeck,L., Yoshida,L.-M., Hafalla,J.C.R., Hue,S., Hibberd,M.L.	2023-02-17 21:00:00	DEN-P-0986-1	Dengue virus	Flavivirus	Flaviviridae	ssRNA(+)	10176	GenBank	partial		Viet Nam: Nha Trang	Viet Nam	Homo sapiens	blood	2018-10-12	Dengue virus type I isolate DEN-P-0986-1 polyprotein (POLY) gene, partial cds
OQ426724	Ashall,J., Shah,S., Biggs,J.R., Chang,R., Jafari,Y., Brady,O.J., Mai,H.K., Lien,L.T., Thai,H.D., Nhuyen,H.A.T., Anh,D., Iwasaki,C., Kitamura,N., Van Loock,M., Herrera-Taracena,G., Rasschaert,F., Van Wesenbeeck,L., Yoshida,L.-M., Hafalla,J.C.R., Hue,S., Hibberd,M.L.	2023-02-17 21:00:00	DEN-P-0977-1	Dengue virus	Flavivirus	Flaviviridae	ssRNA(+)	10176	GenBank	partial		Viet Nam: Nha Trang	Viet Nam	Homo sapiens	blood	2018-10-10	Dengue virus type I isolate DEN-P-0977-1 polyprotein (POLY) gene, partial cds
OQ426723	Ashall,J., Shah,S., Biggs,J.R., Chang,R., Jafari,Y., Brady,O.J., Mai,H.K., Lien,L.T., Thai,H.D., Nhuyen,H.A.T., Anh,D., Iwasaki,C., Kitamura,N., Van Loock,M., Herrera-Taracena,G., Rasschaert,F., Van Wesenbeeck,L., Yoshida,L.-M., Hafalla,J.C.R., Hue,S., Hibberd,M.L.	2023-02-17 21:00:00	DET-P-0463-1	Dengue virus	Flavivirus	Flaviviridae	ssRNA(+)	10176	GenBank	partial		Viet Nam: Nha Trang	Viet Nam	Homo sapiens	blood	2019-02-13	Dengue virus type I isolate DET-P-0463-1 polyprotein (POLY) gene, partial cds
OQ426722	Ashall,J., Shah,S., Biggs,J.R., Chang,R., Jafari,Y., Brady,O.J., Mai,H.K., Lien,L.T., Thai,H.D., Nhuyen,H.A.T., Anh,D., Iwasaki,C., Kitamura,N., Van Loock,M., Herrera-Taracena,G., Rasschaert,F., Van Wesenbeeck,L., Yoshida,L.-M., Hafalla,J.C.R., Hue,S., Hibberd,M.L.	2023-02-17 21:00:00	DET-F-0487-02-1	Dengue virus	Flavivirus	Flaviviridae	ssRNA(+)	10176	GenBank	partial		Viet Nam: Nha Trang	Viet Nam	Homo sapiens	blood	2019-03-25	Dengue virus type I isolate DET-F-0487-02-1 polyprotein (POLY) gene, partial cds
OQ426721	Ashall,J., Shah,S., Biggs,J.R., Chang,R., Jafari,Y., Brady,O.J., Mai,H.K., Lien,L.T., Thai,H.D., Nhuyen,H.A.T., Anh,D., Iwasaki,C., Kitamura,N., Van Loock,M., Herrera-Taracena,G., Rasschaert,F., Van Wesenbeeck,L., Yoshida,L.-M., Hafalla,J.C.R., Hue,S., Hibberd,M.L.	2023-02-17 21:00:00	DEN-P-1458-1	Dengue virus	Flavivirus	Flaviviridae	ssRNA(+)	10176	GenBank	partial		Viet Nam: Nha Trang	Viet Nam	Homo sapiens	blood	2019-01-14	Dengue virus type I isolate DEN-P-1458-1 polyprotein (POLY) gene, partial cds
OQ426720	Ashall,J., Shah,S., Biggs,J.R., Chang,R., Jafari,Y., Brady,O.J., Mai,H.K., Lien,L.T., Thai,H.D., Nhuyen,H.A.T., Anh,D., Iwasaki,C., Kitamura,N., Van Loock,M., Herrera-Taracena,G., Rasschaert,F., Van Wesenbeeck,L., Yoshida,L.-M., Hafalla,J.C.R., Hue,S., Hibberd,M.L.	2023-02-17 21:00:00	DEN-P-1416-1	Dengue virus	Flavivirus	Flaviviridae	ssRNA(+)	10176	GenBank	partial		Viet Nam: Nha Trang	Viet Nam	Homo sapiens	blood	2019-01-08	Dengue virus type I isolate DEN-P-1416-1 polyprotein (POLY) gene, partial cds
OQ426719	Ashall,J., Shah,S., Biggs,J.R., Chang,R., Jafari,Y., Brady,O.J., Mai,H.K., Lien,L.T., Thai,H.D., Nhuyen,H.A.T., Anh,D., Iwasaki,C., Kitamura,N., Van Loock,M., Herrera-Taracena,G., Rasschaert,F., Van Wesenbeeck,L., Yoshida,L.-M., Hafalla,J.C.R., Hue,S., Hibberd,M.L.	2023-02-17 21:00:00	DEN-P-1127-1	Dengue virus	Flavivirus	Flaviviridae	ssRNA(+)	10176	GenBank	partial		Viet Nam: Nha Trang	Viet Nam	Homo sapiens	blood	2018-11-19	Dengue virus type I isolate DEN-P-1127-1 polyprotein (POLY) gene, partial cds
OQ426718	Ashall,J., Shah,S., Biggs,J.R., Chang,R., Jafari,Y., Brady,O.J., Mai,H.K., Lien,L.T., Thai,H.D., Nhuyen,H.A.T., Anh,D., Iwasaki,C., Kitamura,N., Van Loock,M., Herrera-Taracena,G., Rasschaert,F., Van Wesenbeeck,L., Yoshida,L.-M., Hafalla,J.C.R., Hue,S., Hibberd,M.L.	2023-02-17 21:00:00	DEN-P-1055-1	Dengue virus	Flavivirus	Flaviviridae	ssRNA(+)	10176	GenBank	partial		Viet Nam: Nha Trang	Viet Nam	Homo sapiens	blood	2018-11-02	Dengue virus type I isolate DEN-P-1055-1 polyprotein (POLY) gene, partial cds
OQ426717	Ashall,J., Shah,S., Biggs,J.R., Chang,R., Jafari,Y., Brady,O.J., Mai,H.K., Lien,L.T., Thai,H.D., Nhuyen,H.A.T., Anh,D., Iwasaki,C., Kitamura,N., Van Loock,M., Herrera-Taracena,G., Rasschaert,F., Van Wesenbeeck,L., Yoshida,L.-M., Hafalla,J.C.R., Hue,S., Hibberd,M.L.	2023-02-17 21:00:00	DET-P-0090-1	Dengue virus	Flavivirus	Flaviviridae	ssRNA(+)	10176	GenBank	partial		Viet Nam: Nha Trang	Viet Nam	Homo sapiens	blood	2017-09-06	Dengue virus type I isolate DET-P-0090-1 polyprotein (POLY) gene, partial cds
OQ426716	Ashall,J., Shah,S., Biggs,J.R., Chang,R., Jafari,Y., Brady,O.J., Mai,H.K., Lien,L.T., Thai,H.D., Nhuyen,H.A.T., Anh,D., Iwasaki,C., Kitamura,N., Van Loock,M., Herrera-Taracena,G., Rasschaert,F., Van Wesenbeeck,L., Yoshida,L.-M., Hafalla,J.C.R., Hue,S., Hibberd,M.L.	2023-02-17 21:00:00	DET-P-0086-1	Dengue virus	Flavivirus	Flaviviridae	ssRNA(+)	10176	GenBank	partial		Viet Nam: Nha Trang	Viet Nam	Homo sapiens	blood	2017-08-31	Dengue virus type I isolate DET-P-0086-1 polyprotein (POLY) gene, partial cds
OQ426715	Ashall,J., Shah,S., Biggs,J.R., Chang,R., Jafari,Y., Brady,O.J., Mai,H.K., Lien,L.T., Thai,H.D., Nhuyen,H.A.T., Anh,D., Iwasaki,C., Kitamura,N., Van Loock,M., Herrera-Taracena,G., Rasschaert,F., Van Wesenbeeck,L., Yoshida,L.-M., Hafalla,J.C.R., Hue,S., Hibberd,M.L.	2023-02-17 21:00:00	DET-P-0079-1	Dengue virus	Flavivirus	Flaviviridae	ssRNA(+)	10176	GenBank	partial		Viet Nam: Nha Trang	Viet Nam	Homo sapiens	blood	2017-08-26	Dengue virus type I isolate DET-P-0079-1 polyprotein (POLY) gene, partial cds
OQ426714	Ashall,J., Shah,S., Biggs,J.R., Chang,R., Jafari,Y., Brady,O.J., Mai,H.K., Lien,L.T., Thai,H.D., Nhuyen,H.A.T., Anh,D., Iwasaki,C., Kitamura,N., Van Loock,M., Herrera-Taracena,G., Rasschaert,F., Van Wesenbeeck,L., Yoshida,L.-M., Hafalla,J.C.R., Hue,S., Hibberd,M.L.	2023-02-17 21:00:00	DET-P-0073-1	Dengue virus	Flavivirus	Flaviviridae	ssRNA(+)	10176	GenBank	partial		Viet Nam: Nha Trang	Viet Nam	Homo sapiens	blood	2017-08-16	Dengue virus type I isolate DET-P-0073-1 polyprotein (POLY) gene, partial cds
OQ426713	Ashall,J., Shah,S., Biggs,J.R., Chang,R., Jafari,Y., Brady,O.J., Mai,H.K., Lien,L.T., Thai,H.D., Nhuyen,H.A.T., Anh,D., Iwasaki,C., Kitamura,N., Van Loock,M., Herrera-Taracena,G., Rasschaert,F., Van Wesenbeeck,L., Yoshida,L.-M., Hafalla,J.C.R., Hue,S., Hibberd,M.L.	2023-02-17 21:00:00	DET-P-0068-1	Dengue virus	Flavivirus	Flaviviridae	ssRNA(+)	10176	GenBank	partial		Viet Nam: Nha Trang	Viet Nam	Homo sapiens	blood	2017-05-31	Dengue virus type I isolate DET-P-0068-1 polyprotein (POLY) gene, partial cds
OQ426712	Ashall,J., Shah,S., Biggs,J.R., Chang,R., Jafari,Y., Brady,O.J., Mai,H.K., Lien,L.T., Thai,H.D., Nhuyen,H.A.T., Anh,D., Iwasaki,C., Kitamura,N., Van Loock,M., Herrera-Taracena,G., Rasschaert,F., Van Wesenbeeck,L., Yoshida,L.-M., Hafalla,J.C.R., Hue,S., Hibberd,M.L.	2023-02-17 21:00:00	DET-P-0066-1	Dengue virus	Flavivirus	Flaviviridae	ssRNA(+)	10176	GenBank	partial		Viet Nam: Nha Trang	Viet Nam	Homo sapiens	blood	2017-07-31	Dengue virus type I isolate DET-P-0066-1 polyprotein (POLY) gene, partial cds
OQ426711	Ashall,J., Shah,S., Biggs,J.R., Chang,R., Jafari,Y., Brady,O.J., Mai,H.K., Lien,L.T., Thai,H.D., Nhuyen,H.A.T., Anh,D., Iwasaki,C., Kitamura,N., Van Loock,M., Herrera-Taracena,G., Rasschaert,F., Van Wesenbeeck,L., Yoshida,L.-M., Hafalla,J.C.R., Hue,S., Hibberd,M.L.	2023-02-17 21:00:00	DET-P-0065-1	Dengue virus	Flavivirus	Flaviviridae	ssRNA(+)	10176	GenBank	partial		Viet Nam: Nha Trang	Viet Nam	Homo sapiens	blood	2017-07-26	Dengue virus type I isolate DET-P-0065-1 polyprotein (POLY) gene, partial cds
OQ426710	Ashall,J., Shah,S., Biggs,J.R., Chang,R., Jafari,Y., Brady,O.J., Mai,H.K., Lien,L.T., Thai,H.D., Nhuyen,H.A.T., Anh,D., Iwasaki,C., Kitamura,N., Van Loock,M., Herrera-Taracena,G., Rasschaert,F., Van Wesenbeeck,L., Yoshida,L.-M., Hafalla,J.C.R., Hue,S., Hibberd,M.L.	2023-02-17 21:00:00	DET-P-0062-1	Dengue virus	Flavivirus	Flaviviridae	ssRNA(+)	10176	GenBank	partial		Viet Nam: Nha Trang	Viet Nam	Homo sapiens	blood	2017-07-21	Dengue virus type I isolate DET-P-0062-1 polyprotein (POLY) gene, partial cds
OQ426709	Ashall,J., Shah,S., Biggs,J.R., Chang,R., Jafari,Y., Brady,O.J., Mai,H.K., Lien,L.T., Thai,H.D., Nhuyen,H.A.T., Anh,D., Iwasaki,C., Kitamura,N., Van Loock,M., Herrera-Taracena,G., Rasschaert,F., Van Wesenbeeck,L., Yoshida,L.-M., Hafalla,J.C.R., Hue,S., Hibberd,M.L.	2023-02-17 21:00:00	DET-P-0061-1	Dengue virus	Flavivirus	Flaviviridae	ssRNA(+)	10176	GenBank	partial		Viet Nam: Nha Trang	Viet Nam	Homo sapiens	blood	2017-07-21	Dengue virus type I isolate DET-P-0061-1 polyprotein (POLY) gene, partial cds
OQ426708	Ashall,J., Shah,S., Biggs,J.R., Chang,R., Jafari,Y., Brady,O.J., Mai,H.K., Lien,L.T., Thai,H.D., Nhuyen,H.A.T., Anh,D., Iwasaki,C., Kitamura,N., Van Loock,M., Herrera-Taracena,G., Rasschaert,F., Van Wesenbeeck,L., Yoshida,L.-M., Hafalla,J.C.R., Hue,S., Hibberd,M.L.	2023-02-17 21:00:00	DET-P-0056-1	Dengue virus	Flavivirus	Flaviviridae	ssRNA(+)	10176	GenBank	partial		Viet Nam: Nha Trang	Viet Nam	Homo sapiens	blood	2017-07-13	Dengue virus type I isolate DET-P-0056-1 polyprotein (POLY) gene, partial cds
OQ426707	Ashall,J., Shah,S., Biggs,J.R., Chang,R., Jafari,Y., Brady,O.J., Mai,H.K., Lien,L.T., Thai,H.D., Nhuyen,H.A.T., Anh,D., Iwasaki,C., Kitamura,N., Van Loock,M., Herrera-Taracena,G., Rasschaert,F., Van Wesenbeeck,L., Yoshida,L.-M., Hafalla,J.C.R., Hue,S., Hibberd,M.L.	2023-02-17 21:00:00	DET-P-0054-1	Dengue virus	Flavivirus	Flaviviridae	ssRNA(+)	10176	GenBank	partial		Viet Nam: Nha Trang	Viet Nam	Homo sapiens	blood	2017-07-06	Dengue virus type I isolate DET-P-0054-1 polyprotein (POLY) gene, partial cds
OQ426706	Ashall,J., Shah,S., Biggs,J.R., Chang,R., Jafari,Y., Brady,O.J., Mai,H.K., Lien,L.T., Thai,H.D., Nhuyen,H.A.T., Anh,D., Iwasaki,C., Kitamura,N., Van Loock,M., Herrera-Taracena,G., Rasschaert,F., Van Wesenbeeck,L., Yoshida,L.-M., Hafalla,J.C.R., Hue,S., Hibberd,M.L.	2023-02-17 21:00:00	DET-P-0036-1	Dengue virus	Flavivirus	Flaviviridae	ssRNA(+)	10176	GenBank	partial		Viet Nam: Nha Trang	Viet Nam	Homo sapiens	blood	2017-05-17	Dengue virus type I isolate DET-P-0036-1 polyprotein (POLY) gene, partial cds
OQ426705	Ashall,J., Shah,S., Biggs,J.R., Chang,R., Jafari,Y., Brady,O.J., Mai,H.K., Lien,L.T., Thai,H.D., Nhuyen,H.A.T., Anh,D., Iwasaki,C., Kitamura,N., Van Loock,M., Herrera-Taracena,G., Rasschaert,F., Van Wesenbeeck,L., Yoshida,L.-M., Hafalla,J.C.R., Hue,S., Hibberd,M.L.	2023-02-17 21:00:00	DET-P-0030-1	Dengue virus	Flavivirus	Flaviviridae	ssRNA(+)	10176	GenBank	partial		Viet Nam: Nha Trang	Viet Nam	Homo sapiens	blood	2017-04-25	Dengue virus type I isolate DET-P-0030-1 polyprotein (POLY) gene, partial cds
OQ426704	Ashall,J., Shah,S., Biggs,J.R., Chang,R., Jafari,Y., Brady,O.J., Mai,H.K., Lien,L.T., Thai,H.D., Nhuyen,H.A.T., Anh,D., Iwasaki,C., Kitamura,N., Van Loock,M., Herrera-Taracena,G., Rasschaert,F., Van Wesenbeeck,L., Yoshida,L.-M., Hafalla,J.C.R., Hue,S., Hibberd,M.L.	2023-02-17 21:00:00	DET-P-0024-1	Dengue virus	Flavivirus	Flaviviridae	ssRNA(+)	10176	GenBank	partial		Viet Nam: Nha Trang	Viet Nam	Homo sapiens	blood	2017-04-13	Dengue virus type I isolate DET-P-0024-1 polyprotein (POLY) gene, partial cds
OQ426703	Ashall,J., Shah,S., Biggs,J.R., Chang,R., Jafari,Y., Brady,O.J., Mai,H.K., Lien,L.T., Thai,H.D., Nhuyen,H.A.T., Anh,D., Iwasaki,C., Kitamura,N., Van Loock,M., Herrera-Taracena,G., Rasschaert,F., Van Wesenbeeck,L., Yoshida,L.-M., Hafalla,J.C.R., Hue,S., Hibberd,M.L.	2023-02-17 21:00:00	DET-P-0021-1	Dengue virus	Flavivirus	Flaviviridae	ssRNA(+)	10176	GenBank	partial		Viet Nam: Nha Trang	Viet Nam	Homo sapiens	blood	2017-04-01	Dengue virus type I isolate DET-P-0021-1 polyprotein (POLY) gene, partial cds
OQ426702	Ashall,J., Shah,S., Biggs,J.R., Chang,R., Jafari,Y., Brady,O.J., Mai,H.K., Lien,L.T., Thai,H.D., Nhuyen,H.A.T., Anh,D., Iwasaki,C., Kitamura,N., Van Loock,M., Herrera-Taracena,G., Rasschaert,F., Van Wesenbeeck,L., Yoshida,L.-M., Hafalla,J.C.R., Hue,S., Hibberd,M.L.	2023-02-17 21:00:00	DET-P-0020-1	Dengue virus	Flavivirus	Flaviviridae	ssRNA(+)	10176	GenBank	partial		Viet Nam: Nha Trang	Viet Nam	Homo sapiens	blood	2017-03-29	Dengue virus type I isolate DET-P-0020-1 polyprotein (POLY) gene, partial cds
OQ426701	Ashall,J., Shah,S., Biggs,J.R., Chang,R., Jafari,Y., Brady,O.J., Mai,H.K., Lien,L.T., Thai,H.D., Nhuyen,H.A.T., Anh,D., Iwasaki,C., Kitamura,N., Van Loock,M., Herrera-Taracena,G., Rasschaert,F., Van Wesenbeeck,L., Yoshida,L.-M., Hafalla,J.C.R., Hue,S., Hibberd,M.L.	2023-02-17 21:00:00	DET-P-0145-1	Dengue virus	Flavivirus	Flaviviridae	ssRNA(+)	10176	GenBank	partial		Viet Nam: Nha Trang	Viet Nam	Homo sapiens	blood	2018-01-16	Dengue virus type I isolate DET-P-0145-1 polyprotein (POLY) gene, partial cds
OQ426700	Ashall,J., Shah,S., Biggs,J.R., Chang,R., Jafari,Y., Brady,O.J., Mai,H.K., Lien,L.T., Thai,H.D., Nhuyen,H.A.T., Anh,D., Iwasaki,C., Kitamura,N., Van Loock,M., Herrera-Taracena,G., Rasschaert,F., Van Wesenbeeck,L., Yoshida,L.-M., Hafalla,J.C.R., Hue,S., Hibberd,M.L.	2023-02-17 21:00:00	DET-P-0140-1	Dengue virus	Flavivirus	Flaviviridae	ssRNA(+)	10176	GenBank	partial		Viet Nam: Nha Trang	Viet Nam	Homo sapiens	blood	2018-01-05	Dengue virus type I isolate DET-P-0140-1 polyprotein (POLY) gene, partial cds
OQ426699	Ashall,J., Shah,S., Biggs,J.R., Chang,R., Jafari,Y., Brady,O.J., Mai,H.K., Lien,L.T., Thai,H.D., Nhuyen,H.A.T., Anh,D., Iwasaki,C., Kitamura,N., Van Loock,M., Herrera-Taracena,G., Rasschaert,F., Van Wesenbeeck,L., Yoshida,L.-M., Hafalla,J.C.R., Hue,S., Hibberd,M.L.	2023-02-17 21:00:00	DET-P-0138-1	Dengue virus	Flavivirus	Flaviviridae	ssRNA(+)	10176	GenBank	partial		Viet Nam: Nha Trang	Viet Nam	Homo sapiens	blood	2018-01-04	Dengue virus type I isolate DET-P-0138-1 polyprotein (POLY) gene, partial cds
OQ426698	Ashall,J., Shah,S., Biggs,J.R., Chang,R., Jafari,Y., Brady,O.J., Mai,H.K., Lien,L.T., Thai,H.D., Nhuyen,H.A.T., Anh,D., Iwasaki,C., Kitamura,N., Van Loock,M., Herrera-Taracena,G., Rasschaert,F., Van Wesenbeeck,L., Yoshida,L.-M., Hafalla,J.C.R., Hue,S., Hibberd,M.L.	2023-02-17 21:00:00	DEN-P-0539-1	Dengue virus	Flavivirus	Flaviviridae	ssRNA(+)	10176	GenBank	partial		Viet Nam: Nha Trang	Viet Nam	Homo sapiens	blood	2017-08-25	Dengue virus type I isolate DEN-P-0539-1 polyprotein (POLY) gene, partial cds
OQ426697	Ashall,J., Shah,S., Biggs,J.R., Chang,R., Jafari,Y., Brady,O.J., Mai,H.K., Lien,L.T., Thai,H.D., Nhuyen,H.A.T., Anh,D., Iwasaki,C., Kitamura,N., Van Loock,M., Herrera-Taracena,G., Rasschaert,F., Van Wesenbeeck,L., Yoshida,L.-M., Hafalla,J.C.R., Hue,S., Hibberd,M.L.	2023-02-17 21:00:00	DEN-P-0435-1	Dengue virus	Flavivirus	Flaviviridae	ssRNA(+)	10176	GenBank	partial		Viet Nam: Nha Trang	Viet Nam	Homo sapiens	blood	2017-06-15	Dengue virus type I isolate DEN-P-0435-1 polyprotein (POLY) gene, partial cds
OQ426696	Ashall,J., Shah,S., Biggs,J.R., Chang,R., Jafari,Y., Brady,O.J., Mai,H.K., Lien,L.T., Thai,H.D., Nhuyen,H.A.T., Anh,D., Iwasaki,C., Kitamura,N., Van Loock,M., Herrera-Taracena,G., Rasschaert,F., Van Wesenbeeck,L., Yoshida,L.-M., Hafalla,J.C.R., Hue,S., Hibberd,M.L.	2023-02-17 21:00:00	DEN-P-0332-1	Dengue virus	Flavivirus	Flaviviridae	ssRNA(+)	10176	GenBank	partial		Viet Nam: Nha Trang	Viet Nam	Homo sapiens	blood	2017-04-24	Dengue virus type I isolate DEN-P-0332-1 polyprotein (POLY) gene, partial cds
OQ426695	Ashall,J., Shah,S., Biggs,J.R., Chang,R., Jafari,Y., Brady,O.J., Mai,H.K., Lien,L.T., Thai,H.D., Nhuyen,H.A.T., Anh,D., Iwasaki,C., Kitamura,N., Van Loock,M., Herrera-Taracena,G., Rasschaert,F., Van Wesenbeeck,L., Yoshida,L.-M., Hafalla,J.C.R., Hue,S., Hibberd,M.L.	2023-02-17 21:00:00	DEN-P-0310-1	Dengue virus	Flavivirus	Flaviviridae	ssRNA(+)	10176	GenBank	partial		Viet Nam: Nha Trang	Viet Nam	Homo sapiens	blood	2017-04-07	Dengue virus type I isolate DEN-P-0310-1 polyprotein (POLY) gene, partial cds
OQ426694	Ashall,J., Shah,S., Biggs,J.R., Chang,R., Jafari,Y., Brady,O.J., Mai,H.K., Lien,L.T., Thai,H.D., Nhuyen,H.A.T., Anh,D., Iwasaki,C., Kitamura,N., Van Loock,M., Herrera-Taracena,G., Rasschaert,F., Van Wesenbeeck,L., Yoshida,L.-M., Hafalla,J.C.R., Hue,S., Hibberd,M.L.	2023-02-17 21:00:00	DEN-P-0301-1	Dengue virus	Flavivirus	Flaviviridae	ssRNA(+)	10176	GenBank	partial		Viet Nam: Nha Trang	Viet Nam	Homo sapiens	blood	2017-03-31	Dengue virus type I isolate DEN-P-0301-1 polyprotein (POLY) gene, partial cds
OQ426693	Ashall,J., Shah,S., Biggs,J.R., Chang,R., Jafari,Y., Brady,O.J., Mai,H.K., Lien,L.T., Thai,H.D., Nhuyen,H.A.T., Anh,D., Iwasaki,C., Kitamura,N., Van Loock,M., Herrera-Taracena,G., Rasschaert,F., Van Wesenbeeck,L., Yoshida,L.-M., Hafalla,J.C.R., Hue,S., Hibberd,M.L.	2023-02-17 21:00:00	DEN-P-0131-1	Dengue virus	Flavivirus	Flaviviridae	ssRNA(+)	10176	GenBank	partial		Viet Nam: Nha Trang	Viet Nam	Homo sapiens	blood	2016-12-06	Dengue virus type I isolate DEN-P-0131-1 polyprotein (POLY) gene, partial cds
OQ426692	Ashall,J., Shah,S., Biggs,J.R., Chang,R., Jafari,Y., Brady,O.J., Mai,H.K., Lien,L.T., Thai,H.D., Nhuyen,H.A.T., Anh,D., Iwasaki,C., Kitamura,N., Van Loock,M., Herrera-Taracena,G., Rasschaert,F., Van Wesenbeeck,L., Yoshida,L.-M., Hafalla,J.C.R., Hue,S., Hibberd,M.L.	2023-02-17 21:00:00	DEN-P-0313-1	Dengue virus	Flavivirus	Flaviviridae	ssRNA(+)	10176	GenBank	partial		Viet Nam: Nha Trang	Viet Nam	Homo sapiens	blood	2017-04-11	Dengue virus type I isolate DEN-P-0313-1 polyprotein (POLY) gene, partial cds
OQ426691	Ashall,J., Shah,S., Biggs,J.R., Chang,R., Jafari,Y., Brady,O.J., Mai,H.K., Lien,L.T., Thai,H.D., Nhuyen,H.A.T., Anh,D., Iwasaki,C., Kitamura,N., Van Loock,M., Herrera-Taracena,G., Rasschaert,F., Van Wesenbeeck,L., Yoshida,L.-M., Hafalla,J.C.R., Hue,S., Hibberd,M.L.	2023-02-17 21:00:00	DEN-F-0252-02-1	Dengue virus	Flavivirus	Flaviviridae	ssRNA(+)	10176	GenBank	partial		Viet Nam: Nha Trang	Viet Nam	Homo sapiens	blood	2019-01-14	Dengue virus type I isolate DEN-F-0252-02-1 polyprotein (POLY) gene, partial cds
OQ426690	Ashall,J., Shah,S., Biggs,J.R., Chang,R., Jafari,Y., Brady,O.J., Mai,H.K., Lien,L.T., Thai,H.D., Nhuyen,H.A.T., Anh,D., Iwasaki,C., Kitamura,N., Van Loock,M., Herrera-Taracena,G., Rasschaert,F., Van Wesenbeeck,L., Yoshida,L.-M., Hafalla,J.C.R., Hue,S., Hibberd,M.L.	2023-02-17 21:00:00	DET-F-0336-01-1	Dengue virus	Flavivirus	Flaviviridae	ssRNA(+)	10176	GenBank	partial		Viet Nam: Nha Trang	Viet Nam	Homo sapiens	blood	2018-11-23	Dengue virus type I isolate DET-F-0336-01-1 polyprotein (POLY) gene, partial cds
OQ426689	Ashall,J., Shah,S., Biggs,J.R., Chang,R., Jafari,Y., Brady,O.J., Mai,H.K., Lien,L.T., Thai,H.D., Nhuyen,H.A.T., Anh,D., Iwasaki,C., Kitamura,N., Van Loock,M., Herrera-Taracena,G., Rasschaert,F., Van Wesenbeeck,L., Yoshida,L.-M., Hafalla,J.C.R., Hue,S., Hibberd,M.L.	2023-02-17 21:00:00	DET-F-0203-04-1	Dengue virus	Flavivirus	Flaviviridae	ssRNA(+)	10176	GenBank	partial		Viet Nam: Nha Trang	Viet Nam	Homo sapiens	blood	2018-09-17	Dengue virus type I isolate DET-F-0203-04-1 polyprotein (POLY) gene, partial cds
OQ426688	Ashall,J., Shah,S., Biggs,J.R., Chang,R., Jafari,Y., Brady,O.J., Mai,H.K., Lien,L.T., Thai,H.D., Nhuyen,H.A.T., Anh,D., Iwasaki,C., Kitamura,N., Van Loock,M., Herrera-Taracena,G., Rasschaert,F., Van Wesenbeeck,L., Yoshida,L.-M., Hafalla,J.C.R., Hue,S., Hibberd,M.L.	2023-02-17 21:00:00	DET-F-0195-01-1	Dengue virus	Flavivirus	Flaviviridae	ssRNA(+)	10176	GenBank	partial		Viet Nam: Nha Trang	Viet Nam	Homo sapiens	blood	2018-09-04	Dengue virus type I isolate DET-F-0195-01-1 polyprotein (POLY) gene, partial cds
OQ426687	Ashall,J., Shah,S., Biggs,J.R., Chang,R., Jafari,Y., Brady,O.J., Mai,H.K., Lien,L.T., Thai,H.D., Nhuyen,H.A.T., Anh,D., Iwasaki,C., Kitamura,N., Van Loock,M., Herrera-Taracena,G., Rasschaert,F., Van Wesenbeeck,L., Yoshida,L.-M., Hafalla,J.C.R., Hue,S., Hibberd,M.L.	2023-02-17 21:00:00	DET-F-0185-03-1	Dengue virus	Flavivirus	Flaviviridae	ssRNA(+)	10176	GenBank	partial		Viet Nam: Nha Trang	Viet Nam	Homo sapiens	blood	2018-08-21	Dengue virus type I isolate DET-F-0185-03-1 polyprotein (POLY) gene, partial cds
OQ426686	Ashall,J., Shah,S., Biggs,J.R., Chang,R., Jafari,Y., Brady,O.J., Mai,H.K., Lien,L.T., Thai,H.D., Nhuyen,H.A.T., Anh,D., Iwasaki,C., Kitamura,N., Van Loock,M., Herrera-Taracena,G., Rasschaert,F., Van Wesenbeeck,L., Yoshida,L.-M., Hafalla,J.C.R., Hue,S., Hibberd,M.L.	2023-02-17 21:00:00	DEN-P-0954-1	Dengue virus	Flavivirus	Flaviviridae	ssRNA(+)	10176	GenBank	partial		Viet Nam: Nha Trang	Viet Nam	Homo sapiens	blood	2018-10-04	Dengue virus type I isolate DEN-P-0954-1 polyprotein (POLY) gene, partial cds
OQ426685	Ashall,J., Shah,S., Biggs,J.R., Chang,R., Jafari,Y., Brady,O.J., Mai,H.K., Lien,L.T., Thai,H.D., Nhuyen,H.A.T., Anh,D., Iwasaki,C., Kitamura,N., Van Loock,M., Herrera-Taracena,G., Rasschaert,F., Van Wesenbeeck,L., Yoshida,L.-M., Hafalla,J.C.R., Hue,S., Hibberd,M.L.	2023-02-17 21:00:00	DET-P-0228-1	Dengue virus	Flavivirus	Flaviviridae	ssRNA(+)	10176	GenBank	partial		Viet Nam: Nha Trang	Viet Nam	Homo sapiens	blood	2018-10-03	Dengue virus type I isolate DET-P-0228-1 polyprotein (POLY) gene, partial cds
OQ426684	Ashall,J., Shah,S., Biggs,J.R., Chang,R., Jafari,Y., Brady,O.J., Mai,H.K., Lien,L.T., Thai,H.D., Nhuyen,H.A.T., Anh,D., Iwasaki,C., Kitamura,N., Van Loock,M., Herrera-Taracena,G., Rasschaert,F., Van Wesenbeeck,L., Yoshida,L.-M., Hafalla,J.C.R., Hue,S., Hibberd,M.L.	2023-02-17 21:00:00	DET-P-0227-1	Dengue virus	Flavivirus	Flaviviridae	ssRNA(+)	10176	GenBank	partial		Viet Nam: Nha Trang	Viet Nam	Homo sapiens	blood	2018-10-01	Dengue virus type I isolate DET-P-0227-1 polyprotein (POLY) gene, partial cds
OQ426683	Ashall,J., Shah,S., Biggs,J.R., Chang,R., Jafari,Y., Brady,O.J., Mai,H.K., Lien,L.T., Thai,H.D., Nhuyen,H.A.T., Anh,D., Iwasaki,C., Kitamura,N., Van Loock,M., Herrera-Taracena,G., Rasschaert,F., Van Wesenbeeck,L., Yoshida,L.-M., Hafalla,J.C.R., Hue,S., Hibberd,M.L.	2023-02-17 21:00:00	DET-P-0224-1	Dengue virus	Flavivirus	Flaviviridae	ssRNA(+)	10176	GenBank	partial		Viet Nam: Nha Trang	Viet Nam	Homo sapiens	blood	2018-09-27	Dengue virus type I isolate DET-P-0224-1 polyprotein (POLY) gene, partial cds
OQ426682	Ashall,J., Shah,S., Biggs,J.R., Chang,R., Jafari,Y., Brady,O.J., Mai,H.K., Lien,L.T., Thai,H.D., Nhuyen,H.A.T., Anh,D., Iwasaki,C., Kitamura,N., Van Loock,M., Herrera-Taracena,G., Rasschaert,F., Van Wesenbeeck,L., Yoshida,L.-M., Hafalla,J.C.R., Hue,S., Hibberd,M.L.	2023-02-17 21:00:00	DEN-P-0943-1	Dengue virus	Flavivirus	Flaviviridae	ssRNA(+)	10176	GenBank	partial		Viet Nam: Nha Trang	Viet Nam	Homo sapiens	blood	2018-09-25	Dengue virus type I isolate DEN-P-0943-1 polyprotein (POLY) gene, partial cds
OQ426681	Ashall,J., Shah,S., Biggs,J.R., Chang,R., Jafari,Y., Brady,O.J., Mai,H.K., Lien,L.T., Thai,H.D., Nhuyen,H.A.T., Anh,D., Iwasaki,C., Kitamura,N., Van Loock,M., Herrera-Taracena,G., Rasschaert,F., Van Wesenbeeck,L., Yoshida,L.-M., Hafalla,J.C.R., Hue,S., Hibberd,M.L.	2023-02-17 21:00:00	DET-P-0212-1	Dengue virus	Flavivirus	Flaviviridae	ssRNA(+)	10176	GenBank	partial		Viet Nam: Nha Trang	Viet Nam	Homo sapiens	blood	2018-09-20	Dengue virus type I isolate DET-P-0212-1 polyprotein (POLY) gene, partial cds
OQ426680	Ashall,J., Shah,S., Biggs,J.R., Chang,R., Jafari,Y., Brady,O.J., Mai,H.K., Lien,L.T., Thai,H.D., Nhuyen,H.A.T., Anh,D., Iwasaki,C., Kitamura,N., Van Loock,M., Herrera-Taracena,G., Rasschaert,F., Van Wesenbeeck,L., Yoshida,L.-M., Hafalla,J.C.R., Hue,S., Hibberd,M.L.	2023-02-17 21:00:00	DEN-P-0931-1	Dengue virus	Flavivirus	Flaviviridae	ssRNA(+)	10176	GenBank	partial		Viet Nam: Nha Trang	Viet Nam	Homo sapiens	blood	2018-09-17	Dengue virus type I isolate DEN-P-0931-1 polyprotein (POLY) gene, partial cds
OQ426679	Ashall,J., Shah,S., Biggs,J.R., Chang,R., Jafari,Y., Brady,O.J., Mai,H.K., Lien,L.T., Thai,H.D., Nhuyen,H.A.T., Anh,D., Iwasaki,C., Kitamura,N., Van Loock,M., Herrera-Taracena,G., Rasschaert,F., Van Wesenbeeck,L., Yoshida,L.-M., Hafalla,J.C.R., Hue,S., Hibberd,M.L.	2023-02-17 21:00:00	DET-P-0201-1	Dengue virus	Flavivirus	Flaviviridae	ssRNA(+)	10176	GenBank	partial		Viet Nam: Nha Trang	Viet Nam	Homo sapiens	blood	2018-09-13	Dengue virus type I isolate DET-P-0201-1 polyprotein (POLY) gene, partial cds
OQ426678	Ashall,J., Shah,S., Biggs,J.R., Chang,R., Jafari,Y., Brady,O.J., Mai,H.K., Lien,L.T., Thai,H.D., Nhuyen,H.A.T., Anh,D., Iwasaki,C., Kitamura,N., Van Loock,M., Herrera-Taracena,G., Rasschaert,F., Van Wesenbeeck,L., Yoshida,L.-M., Hafalla,J.C.R., Hue,S., Hibberd,M.L.	2023-02-17 21:00:00	DEN-P-0914-1	Dengue virus	Flavivirus	Flaviviridae	ssRNA(+)	10176	GenBank	partial		Viet Nam: Nha Trang	Viet Nam	Homo sapiens	blood	2018-08-28	Dengue virus type I isolate DEN-P-0914-1 polyprotein (POLY) gene, partial cds
OQ426677	Ashall,J., Shah,S., Biggs,J.R., Chang,R., Jafari,Y., Brady,O.J., Mai,H.K., Lien,L.T., Thai,H.D., Nhuyen,H.A.T., Anh,D., Iwasaki,C., Kitamura,N., Van Loock,M., Herrera-Taracena,G., Rasschaert,F., Van Wesenbeeck,L., Yoshida,L.-M., Hafalla,J.C.R., Hue,S., Hibberd,M.L.	2023-02-17 21:00:00	DET-P-0190-1	Dengue virus	Flavivirus	Flaviviridae	ssRNA(+)	10176	GenBank	partial		Viet Nam: Nha Trang	Viet Nam	Homo sapiens	blood	2018-08-23	Dengue virus type I isolate DET-P-0190-1 polyprotein (POLY) gene, partial cds
OQ426676	Ashall,J., Shah,S., Biggs,J.R., Chang,R., Jafari,Y., Brady,O.J., Mai,H.K., Lien,L.T., Thai,H.D., Nhuyen,H.A.T., Anh,D., Iwasaki,C., Kitamura,N., Van Loock,M., Herrera-Taracena,G., Rasschaert,F., Van Wesenbeeck,L., Yoshida,L.-M., Hafalla,J.C.R., Hue,S., Hibberd,M.L.	2023-02-17 21:00:00	DEN-P-0884-1	Dengue virus	Flavivirus	Flaviviridae	ssRNA(+)	10176	GenBank	partial		Viet Nam: Nha Trang	Viet Nam	Homo sapiens	blood	2018-07-16	Dengue virus type I isolate DEN-P-0884-1 polyprotein (POLY) gene, partial cds
OQ426675	Ashall,J., Shah,S., Biggs,J.R., Chang,R., Jafari,Y., Brady,O.J., Mai,H.K., Lien,L.T., Thai,H.D., Nhuyen,H.A.T., Anh,D., Iwasaki,C., Kitamura,N., Van Loock,M., Herrera-Taracena,G., Rasschaert,F., Van Wesenbeeck,L., Yoshida,L.-M., Hafalla,J.C.R., Hue,S., Hibberd,M.L.	2023-02-17 21:00:00	DET-P-0058-1	Dengue virus	Flavivirus	Flaviviridae	ssRNA(+)	10176	GenBank	partial		Viet Nam: Nha Trang	Viet Nam	Homo sapiens	blood	2017-07-17	Dengue virus type I isolate DET-P-0058-1 polyprotein (POLY) gene, partial cds
OQ426674	Ashall,J., Shah,S., Biggs,J.R., Chang,R., Jafari,Y., Brady,O.J., Mai,H.K., Lien,L.T., Thai,H.D., Nhuyen,H.A.T., Anh,D., Iwasaki,C., Kitamura,N., Van Loock,M., Herrera-Taracena,G., Rasschaert,F., Van Wesenbeeck,L., Yoshida,L.-M., Hafalla,J.C.R., Hue,S., Hibberd,M.L.	2023-02-17 21:00:00	DET-P-0048-1	Dengue virus	Flavivirus	Flaviviridae	ssRNA(+)	10176	GenBank	partial		Viet Nam: Nha Trang	Viet Nam	Homo sapiens	blood	2017-06-29	Dengue virus type I isolate DET-P-0048-1 polyprotein (POLY) gene, partial cds
OQ426673	Ashall,J., Shah,S., Biggs,J.R., Chang,R., Jafari,Y., Brady,O.J., Mai,H.K., Lien,L.T., Thai,H.D., Nhuyen,H.A.T., Anh,D., Iwasaki,C., Kitamura,N., Van Loock,M., Herrera-Taracena,G., Rasschaert,F., Van Wesenbeeck,L., Yoshida,L.-M., Hafalla,J.C.R., Hue,S., Hibberd,M.L.	2023-02-17 21:00:00	DET-P-0043-1	Dengue virus	Flavivirus	Flaviviridae	ssRNA(+)	10176	GenBank	partial		Viet Nam: Nha Trang	Viet Nam	Homo sapiens	blood	2017-06-16	Dengue virus type I isolate DET-P-0043-1 polyprotein (POLY) gene, partial cds
OQ426672	Ashall,J., Shah,S., Biggs,J.R., Chang,R., Jafari,Y., Brady,O.J., Mai,H.K., Lien,L.T., Thai,H.D., Nhuyen,H.A.T., Anh,D., Iwasaki,C., Kitamura,N., Van Loock,M., Herrera-Taracena,G., Rasschaert,F., Van Wesenbeeck,L., Yoshida,L.-M., Hafalla,J.C.R., Hue,S., Hibberd,M.L.	2023-02-17 21:00:00	DET-P-0040-1	Dengue virus	Flavivirus	Flaviviridae	ssRNA(+)	10176	GenBank	partial		Viet Nam: Nha Trang	Viet Nam	Homo sapiens	blood	2017-05-30	Dengue virus type I isolate DET-P-0040-1 polyprotein (POLY) gene, partial cds
OQ426671	Ashall,J., Shah,S., Biggs,J.R., Chang,R., Jafari,Y., Brady,O.J., Mai,H.K., Lien,L.T., Thai,H.D., Nhuyen,H.A.T., Anh,D., Iwasaki,C., Kitamura,N., Van Loock,M., Herrera-Taracena,G., Rasschaert,F., Van Wesenbeeck,L., Yoshida,L.-M., Hafalla,J.C.R., Hue,S., Hibberd,M.L.	2023-02-17 21:00:00	DET-P-0039-1	Dengue virus	Flavivirus	Flaviviridae	ssRNA(+)	10176	GenBank	partial		Viet Nam: Nha Trang	Viet Nam	Homo sapiens	blood	2017-05-29	Dengue virus type I isolate DET-P-0039-1 polyprotein (POLY) gene, partial cds
OQ426670	Ashall,J., Shah,S., Biggs,J.R., Chang,R., Jafari,Y., Brady,O.J., Mai,H.K., Lien,L.T., Thai,H.D., Nhuyen,H.A.T., Anh,D., Iwasaki,C., Kitamura,N., Van Loock,M., Herrera-Taracena,G., Rasschaert,F., Van Wesenbeeck,L., Yoshida,L.-M., Hafalla,J.C.R., Hue,S., Hibberd,M.L.	2023-02-17 21:00:00	DET-P-0037-1	Dengue virus	Flavivirus	Flaviviridae	ssRNA(+)	10176	GenBank	partial		Viet Nam: Nha Trang	Viet Nam	Homo sapiens	blood	2017-05-17	Dengue virus type I isolate DET-P-0037-1 polyprotein (POLY) gene, partial cds
OQ426669	Ashall,J., Shah,S., Biggs,J.R., Chang,R., Jafari,Y., Brady,O.J., Mai,H.K., Lien,L.T., Thai,H.D., Nhuyen,H.A.T., Anh,D., Iwasaki,C., Kitamura,N., Van Loock,M., Herrera-Taracena,G., Rasschaert,F., Van Wesenbeeck,L., Yoshida,L.-M., Hafalla,J.C.R., Hue,S., Hibberd,M.L.	2023-02-17 21:00:00	DET-P-0033-1	Dengue virus	Flavivirus	Flaviviridae	ssRNA(+)	10176	GenBank	partial		Viet Nam: Nha Trang	Viet Nam	Homo sapiens	blood	2017-05-10	Dengue virus type I isolate DET-P-0033-1 polyprotein (POLY) gene, partial cds
OQ426668	Ashall,J., Shah,S., Biggs,J.R., Chang,R., Jafari,Y., Brady,O.J., Mai,H.K., Lien,L.T., Thai,H.D., Nhuyen,H.A.T., Anh,D., Iwasaki,C., Kitamura,N., Van Loock,M., Herrera-Taracena,G., Rasschaert,F., Van Wesenbeeck,L., Yoshida,L.-M., Hafalla,J.C.R., Hue,S., Hibberd,M.L.	2023-02-17 21:00:00	DET-P-0112-1	Dengue virus	Flavivirus	Flaviviridae	ssRNA(+)	10176	GenBank	partial		Viet Nam: Nha Trang	Viet Nam	Homo sapiens	blood	2017-10-30	Dengue virus type I isolate DET-P-0112-1 polyprotein (POLY) gene, partial cds
OQ426667	Ashall,J., Shah,S., Biggs,J.R., Chang,R., Jafari,Y., Brady,O.J., Mai,H.K., Lien,L.T., Thai,H.D., Nhuyen,H.A.T., Anh,D., Iwasaki,C., Kitamura,N., Van Loock,M., Herrera-Taracena,G., Rasschaert,F., Van Wesenbeeck,L., Yoshida,L.-M., Hafalla,J.C.R., Hue,S., Hibberd,M.L.	2023-02-17 21:00:00	DET-P-0017-1	Dengue virus	Flavivirus	Flaviviridae	ssRNA(+)	10176	GenBank	partial		Viet Nam: Nha Trang	Viet Nam	Homo sapiens	blood	2017-03-20	Dengue virus type I isolate DET-P-0017-1 polyprotein (POLY) gene, partial cds
OQ426666	Ashall,J., Shah,S., Biggs,J.R., Chang,R., Jafari,Y., Brady,O.J., Mai,H.K., Lien,L.T., Thai,H.D., Nhuyen,H.A.T., Anh,D., Iwasaki,C., Kitamura,N., Van Loock,M., Herrera-Taracena,G., Rasschaert,F., Van Wesenbeeck,L., Yoshida,L.-M., Hafalla,J.C.R., Hue,S., Hibberd,M.L.	2023-02-17 21:00:00	DET-P-0006-1	Dengue virus	Flavivirus	Flaviviridae	ssRNA(+)	10176	GenBank	partial		Viet Nam: Nha Trang	Viet Nam	Homo sapiens	blood	2017-02-09	Dengue virus type I isolate DET-P-0006-1 polyprotein (POLY) gene, partial cds
OQ426665	Ashall,J., Shah,S., Biggs,J.R., Chang,R., Jafari,Y., Brady,O.J., Mai,H.K., Lien,L.T., Thai,H.D., Nhuyen,H.A.T., Anh,D., Iwasaki,C., Kitamura,N., Van Loock,M., Herrera-Taracena,G., Rasschaert,F., Van Wesenbeeck,L., Yoshida,L.-M., Hafalla,J.C.R., Hue,S., Hibberd,M.L.	2023-02-17 21:00:00	DET-P-0155-1	Dengue virus	Flavivirus	Flaviviridae	ssRNA(+)	10176	GenBank	partial		Viet Nam: Nha Trang	Viet Nam	Homo sapiens	blood	2018-03-16	Dengue virus type I isolate DET-P-0155-1 polyprotein (POLY) gene, partial cds
OQ426664	Ashall,J., Shah,S., Biggs,J.R., Chang,R., Jafari,Y., Brady,O.J., Mai,H.K., Lien,L.T., Thai,H.D., Nhuyen,H.A.T., Anh,D., Iwasaki,C., Kitamura,N., Van Loock,M., Herrera-Taracena,G., Rasschaert,F., Van Wesenbeeck,L., Yoshida,L.-M., Hafalla,J.C.R., Hue,S., Hibberd,M.L.	2023-02-17 21:00:00	DEN-P-0747-1	Dengue virus	Flavivirus	Flaviviridae	ssRNA(+)	10176	GenBank	partial		Viet Nam: Nha Trang	Viet Nam	Homo sapiens	blood	2018-02-02	Dengue virus type I isolate DEN-P-0747-1 polyprotein (POLY) gene, partial cds
OQ426663	Ashall,J., Shah,S., Biggs,J.R., Chang,R., Jafari,Y., Brady,O.J., Mai,H.K., Lien,L.T., Thai,H.D., Nhuyen,H.A.T., Anh,D., Iwasaki,C., Kitamura,N., Van Loock,M., Herrera-Taracena,G., Rasschaert,F., Van Wesenbeeck,L., Yoshida,L.-M., Hafalla,J.C.R., Hue,S., Hibberd,M.L.	2023-02-17 21:00:00	DET-P-0149-1	Dengue virus	Flavivirus	Flaviviridae	ssRNA(+)	10176	GenBank	partial		Viet Nam: Nha Trang	Viet Nam	Homo sapiens	blood	2018-01-30	Dengue virus type I isolate DET-P-0149-1 polyprotein (POLY) gene, partial cds
OQ426662	Ashall,J., Shah,S., Biggs,J.R., Chang,R., Jafari,Y., Brady,O.J., Mai,H.K., Lien,L.T., Thai,H.D., Nhuyen,H.A.T., Anh,D., Iwasaki,C., Kitamura,N., Van Loock,M., Herrera-Taracena,G., Rasschaert,F., Van Wesenbeeck,L., Yoshida,L.-M., Hafalla,J.C.R., Hue,S., Hibberd,M.L.	2023-02-17 21:00:00	DET-P-0144-1	Dengue virus	Flavivirus	Flaviviridae	ssRNA(+)	10176	GenBank	partial		Viet Nam: Nha Trang	Viet Nam	Homo sapiens	blood	2018-01-09	Dengue virus type I isolate DET-P-0144-1 polyprotein (POLY) gene, partial cds
OQ426661	Ashall,J., Shah,S., Biggs,J.R., Chang,R., Jafari,Y., Brady,O.J., Mai,H.K., Lien,L.T., Thai,H.D., Nhuyen,H.A.T., Anh,D., Iwasaki,C., Kitamura,N., Van Loock,M., Herrera-Taracena,G., Rasschaert,F., Van Wesenbeeck,L., Yoshida,L.-M., Hafalla,J.C.R., Hue,S., Hibberd,M.L.	2023-02-17 21:00:00	DET-P-0134-1	Dengue virus	Flavivirus	Flaviviridae	ssRNA(+)	10176	GenBank	partial		Viet Nam: Nha Trang	Viet Nam	Homo sapiens	blood	2017-12-21	Dengue virus type I isolate DET-P-0134-1 polyprotein (POLY) gene, partial cds
OQ426660	Ashall,J., Shah,S., Biggs,J.R., Chang,R., Jafari,Y., Brady,O.J., Mai,H.K., Lien,L.T., Thai,H.D., Nhuyen,H.A.T., Anh,D., Iwasaki,C., Kitamura,N., Van Loock,M., Herrera-Taracena,G., Rasschaert,F., Van Wesenbeeck,L., Yoshida,L.-M., Hafalla,J.C.R., Hue,S., Hibberd,M.L.	2023-02-17 21:00:00	DET-P-0129-1	Dengue virus	Flavivirus	Flaviviridae	ssRNA(+)	10176	GenBank	partial		Viet Nam: Nha Trang	Viet Nam	Homo sapiens	blood	2017-12-14	Dengue virus type I isolate DET-P-0129-1 polyprotein (POLY) gene, partial cds
OQ426659	Ashall,J., Shah,S., Biggs,J.R., Chang,R., Jafari,Y., Brady,O.J., Mai,H.K., Lien,L.T., Thai,H.D., Nhuyen,H.A.T., Anh,D., Iwasaki,C., Kitamura,N., Van Loock,M., Herrera-Taracena,G., Rasschaert,F., Van Wesenbeeck,L., Yoshida,L.-M., Hafalla,J.C.R., Hue,S., Hibberd,M.L.	2023-02-17 21:00:00	DET-P-0117-1	Dengue virus	Flavivirus	Flaviviridae	ssRNA(+)	10176	GenBank	partial		Viet Nam: Nha Trang	Viet Nam	Homo sapiens	blood	2017-11-29	Dengue virus type I isolate DET-P-0117-1 polyprotein (POLY) gene, partial cds
OQ426658	Ashall,J., Shah,S., Biggs,J.R., Chang,R., Jafari,Y., Brady,O.J., Mai,H.K., Lien,L.T., Thai,H.D., Nhuyen,H.A.T., Anh,D., Iwasaki,C., Kitamura,N., Van Loock,M., Herrera-Taracena,G., Rasschaert,F., Van Wesenbeeck,L., Yoshida,L.-M., Hafalla,J.C.R., Hue,S., Hibberd,M.L.	2023-02-17 21:00:00	DEN-P-0626-1	Dengue virus	Flavivirus	Flaviviridae	ssRNA(+)	10176	GenBank	partial		Viet Nam: Nha Trang	Viet Nam	Homo sapiens	blood	2017-11-02	Dengue virus type I isolate DEN-P-0626-1 polyprotein (POLY) gene, partial cds
OQ426657	Ashall,J., Shah,S., Biggs,J.R., Chang,R., Jafari,Y., Brady,O.J., Mai,H.K., Lien,L.T., Thai,H.D., Nhuyen,H.A.T., Anh,D., Iwasaki,C., Kitamura,N., Van Loock,M., Herrera-Taracena,G., Rasschaert,F., Van Wesenbeeck,L., Yoshida,L.-M., Hafalla,J.C.R., Hue,S., Hibberd,M.L.	2023-02-17 21:00:00	DET-P-0110-1	Dengue virus	Flavivirus	Flaviviridae	ssRNA(+)	10176	GenBank	partial		Viet Nam: Nha Trang	Viet Nam	Homo sapiens	blood	2017-10-19	Dengue virus type I isolate DET-P-0110-1 polyprotein (POLY) gene, partial cds
OQ426656	Ashall,J., Shah,S., Biggs,J.R., Chang,R., Jafari,Y., Brady,O.J., Mai,H.K., Lien,L.T., Thai,H.D., Nhuyen,H.A.T., Anh,D., Iwasaki,C., Kitamura,N., Van Loock,M., Herrera-Taracena,G., Rasschaert,F., Van Wesenbeeck,L., Yoshida,L.-M., Hafalla,J.C.R., Hue,S., Hibberd,M.L.	2023-02-17 21:00:00	DEN-P-0613-1	Dengue virus	Flavivirus	Flaviviridae	ssRNA(+)	10176	GenBank	partial		Viet Nam: Nha Trang	Viet Nam	Homo sapiens	blood	2017-10-13	Dengue virus type I isolate DEN-P-0613-1 polyprotein (POLY) gene, partial cds
OQ426655	Ashall,J., Shah,S., Biggs,J.R., Chang,R., Jafari,Y., Brady,O.J., Mai,H.K., Lien,L.T., Thai,H.D., Nhuyen,H.A.T., Anh,D., Iwasaki,C., Kitamura,N., Van Loock,M., Herrera-Taracena,G., Rasschaert,F., Van Wesenbeeck,L., Yoshida,L.-M., Hafalla,J.C.R., Hue,S., Hibberd,M.L.	2023-02-17 21:00:00	DET-P-0085-1	Dengue virus	Flavivirus	Flaviviridae	ssRNA(+)	10176	GenBank	partial		Viet Nam: Nha Trang	Viet Nam	Homo sapiens	blood	2017-08-29	Dengue virus type I isolate DET-P-0085-1 polyprotein (POLY) gene, partial cds
OQ426654	Ashall,J., Shah,S., Biggs,J.R., Chang,R., Jafari,Y., Brady,O.J., Mai,H.K., Lien,L.T., Thai,H.D., Nhuyen,H.A.T., Anh,D., Iwasaki,C., Kitamura,N., Van Loock,M., Herrera-Taracena,G., Rasschaert,F., Van Wesenbeeck,L., Yoshida,L.-M., Hafalla,J.C.R., Hue,S., Hibberd,M.L.	2023-02-17 21:00:00	DEN-P-0518-1	Dengue virus	Flavivirus	Flaviviridae	ssRNA(+)	10176	GenBank	partial		Viet Nam: Nha Trang	Viet Nam	Homo sapiens	blood	2017-08-14	Dengue virus type I isolate DEN-P-0518-1 polyprotein (POLY) gene, partial cds
OQ426653	Ashall,J., Shah,S., Biggs,J.R., Chang,R., Jafari,Y., Brady,O.J., Mai,H.K., Lien,L.T., Thai,H.D., Nhuyen,H.A.T., Anh,D., Iwasaki,C., Kitamura,N., Van Loock,M., Herrera-Taracena,G., Rasschaert,F., Van Wesenbeeck,L., Yoshida,L.-M., Hafalla,J.C.R., Hue,S., Hibberd,M.L.	2023-02-17 21:00:00	DET-P-0069-1	Dengue virus	Flavivirus	Flaviviridae	ssRNA(+)	10176	GenBank	partial		Viet Nam: Nha Trang	Viet Nam	Homo sapiens	blood	2017-08-07	Dengue virus type I isolate DET-P-0069-1 polyprotein (POLY) gene, partial cds
OQ426652	Ashall,J., Shah,S., Biggs,J.R., Chang,R., Jafari,Y., Brady,O.J., Mai,H.K., Lien,L.T., Thai,H.D., Nhuyen,H.A.T., Anh,D., Iwasaki,C., Kitamura,N., Van Loock,M., Herrera-Taracena,G., Rasschaert,F., Van Wesenbeeck,L., Yoshida,L.-M., Hafalla,J.C.R., Hue,S., Hibberd,M.L.	2023-02-17 21:00:00	DET-P-0029-1	Dengue virus	Flavivirus	Flaviviridae	ssRNA(+)	10176	GenBank	partial		Viet Nam: Nha Trang	Viet Nam	Homo sapiens	blood	2017-04-24	Dengue virus type I isolate DET-P-0029-1 polyprotein (POLY) gene, partial cds
OQ426651	Ashall,J., Shah,S., Biggs,J.R., Chang,R., Jafari,Y., Brady,O.J., Mai,H.K., Lien,L.T., Thai,H.D., Nhuyen,H.A.T., Anh,D., Iwasaki,C., Kitamura,N., Van Loock,M., Herrera-Taracena,G., Rasschaert,F., Van Wesenbeeck,L., Yoshida,L.-M., Hafalla,J.C.R., Hue,S., Hibberd,M.L.	2023-02-17 21:00:00	DET-P-0015-1	Dengue virus	Flavivirus	Flaviviridae	ssRNA(+)	10176	GenBank	partial		Viet Nam: Nha Trang	Viet Nam	Homo sapiens	blood	2017-03-14	Dengue virus type I isolate DET-P-0015-1 polyprotein (POLY) gene, partial cds
OQ426650	Ashall,J., Shah,S., Biggs,J.R., Chang,R., Jafari,Y., Brady,O.J., Mai,H.K., Lien,L.T., Thai,H.D., Nhuyen,H.A.T., Anh,D., Iwasaki,C., Kitamura,N., Van Loock,M., Herrera-Taracena,G., Rasschaert,F., Van Wesenbeeck,L., Yoshida,L.-M., Hafalla,J.C.R., Hue,S., Hibberd,M.L.	2023-02-17 21:00:00	DET-P-0008-1	Dengue virus	Flavivirus	Flaviviridae	ssRNA(+)	10176	GenBank	partial		Viet Nam: Nha Trang	Viet Nam	Homo sapiens	blood	2017-02-24	Dengue virus type I isolate DET-P-0008-1 polyprotein (POLY) gene, partial cds
OQ426649	Ashall,J., Shah,S., Biggs,J.R., Chang,R., Jafari,Y., Brady,O.J., Mai,H.K., Lien,L.T., Thai,H.D., Nhuyen,H.A.T., Anh,D., Iwasaki,C., Kitamura,N., Van Loock,M., Herrera-Taracena,G., Rasschaert,F., Van Wesenbeeck,L., Yoshida,L.-M., Hafalla,J.C.R., Hue,S., Hibberd,M.L.	2023-02-17 21:00:00	DET-P-0127-1	Dengue virus	Flavivirus	Flaviviridae	ssRNA(+)	10176	GenBank	partial		Viet Nam: Nha Trang	Viet Nam	Homo sapiens	blood	2017-12-13	Dengue virus type I isolate DET-P-0127-1 polyprotein (POLY) gene, partial cds
OQ426648	Ashall,J., Shah,S., Biggs,J.R., Chang,R., Jafari,Y., Brady,O.J., Mai,H.K., Lien,L.T., Thai,H.D., Nhuyen,H.A.T., Anh,D., Iwasaki,C., Kitamura,N., Van Loock,M., Herrera-Taracena,G., Rasschaert,F., Van Wesenbeeck,L., Yoshida,L.-M., Hafalla,J.C.R., Hue,S., Hibberd,M.L.	2023-02-17 21:00:00	DEN-P-0515-1	Dengue virus	Flavivirus	Flaviviridae	ssRNA(+)	10176	GenBank	partial		Viet Nam: Nha Trang	Viet Nam	Homo sapiens	blood	2017-08-09	Dengue virus type I isolate DEN-P-0515-1 polyprotein (POLY) gene, partial cds
OQ426647	Ashall,J., Shah,S., Biggs,J.R., Chang,R., Jafari,Y., Brady,O.J., Mai,H.K., Lien,L.T., Thai,H.D., Nhuyen,H.A.T., Anh,D., Iwasaki,C., Kitamura,N., Van Loock,M., Herrera-Taracena,G., Rasschaert,F., Van Wesenbeeck,L., Yoshida,L.-M., Hafalla,J.C.R., Hue,S., Hibberd,M.L.	2023-02-17 21:00:00	DEN-P-0134-1	Dengue virus	Flavivirus	Flaviviridae	ssRNA(+)	10176	GenBank	partial		Viet Nam: Nha Trang	Viet Nam	Homo sapiens	blood	2016-12-07	Dengue virus type I isolate DEN-P-0134-1 polyprotein (POLY) gene, partial cds
OQ426646	Ashall,J., Shah,S., Biggs,J.R., Chang,R., Jafari,Y., Brady,O.J., Mai,H.K., Lien,L.T., Thai,H.D., Nhuyen,H.A.T., Anh,D., Iwasaki,C., Kitamura,N., Van Loock,M., Herrera-Taracena,G., Rasschaert,F., Van Wesenbeeck,L., Yoshida,L.-M., Hafalla,J.C.R., Hue,S., Hibberd,M.L.	2023-02-17 21:00:00	DEN-P-0100-1	Dengue virus	Flavivirus	Flaviviridae	ssRNA(+)	10176	GenBank	partial		Viet Nam: Nha Trang	Viet Nam	Homo sapiens	blood	2016-11-29	Dengue virus type I isolate DEN-P-0100-1 polyprotein (POLY) gene, partial cds
OQ426645	Ashall,J., Shah,S., Biggs,J.R., Chang,R., Jafari,Y., Brady,O.J., Mai,H.K., Lien,L.T., Thai,H.D., Nhuyen,H.A.T., Anh,D., Iwasaki,C., Kitamura,N., Van Loock,M., Herrera-Taracena,G., Rasschaert,F., Van Wesenbeeck,L., Yoshida,L.-M., Hafalla,J.C.R., Hue,S., Hibberd,M.L.	2023-02-17 21:00:00	DEN-P-0095-1	Dengue virus	Flavivirus	Flaviviridae	ssRNA(+)	10176	GenBank	partial		Viet Nam: Nha Trang	Viet Nam	Homo sapiens	blood	2016-11-28	Dengue virus type I isolate DEN-P-0095-1 polyprotein (POLY) gene, partial cds
OQ426644	Ashall,J., Shah,S., Biggs,J.R., Chang,R., Jafari,Y., Brady,O.J., Mai,H.K., Lien,L.T., Thai,H.D., Nhuyen,H.A.T., Anh,D., Iwasaki,C., Kitamura,N., Van Loock,M., Herrera-Taracena,G., Rasschaert,F., Van Wesenbeeck,L., Yoshida,L.-M., Hafalla,J.C.R., Hue,S., Hibberd,M.L.	2023-02-17 21:00:00	DET-P-0497-1	Dengue virus	Flavivirus	Flaviviridae	ssRNA(+)	10176	GenBank	partial		Viet Nam: Nha Trang	Viet Nam	Homo sapiens	blood	2019-04-25	Dengue virus type I isolate DET-P-0497-1 polyprotein (POLY) gene, partial cds
OQ426643	Ashall,J., Shah,S., Biggs,J.R., Chang,R., Jafari,Y., Brady,O.J., Mai,H.K., Lien,L.T., Thai,H.D., Nhuyen,H.A.T., Anh,D., Iwasaki,C., Kitamura,N., Van Loock,M., Herrera-Taracena,G., Rasschaert,F., Van Wesenbeeck,L., Yoshida,L.-M., Hafalla,J.C.R., Hue,S., Hibberd,M.L.	2023-02-17 21:00:00	DET-P-0490-1	Dengue virus	Flavivirus	Flaviviridae	ssRNA(+)	10176	GenBank	partial		Viet Nam: Nha Trang	Viet Nam	Homo sapiens	blood	2019-03-27	Dengue virus type I isolate DET-P-0490-1 polyprotein (POLY) gene, partial cds
OQ426642	Ashall,J., Shah,S., Biggs,J.R., Chang,R., Jafari,Y., Brady,O.J., Mai,H.K., Lien,L.T., Thai,H.D., Nhuyen,H.A.T., Anh,D., Iwasaki,C., Kitamura,N., Van Loock,M., Herrera-Taracena,G., Rasschaert,F., Van Wesenbeeck,L., Yoshida,L.-M., Hafalla,J.C.R., Hue,S., Hibberd,M.L.	2023-02-17 21:00:00	DET-P-0374-1	Dengue virus	Flavivirus	Flaviviridae	ssRNA(+)	10176	GenBank	partial		Viet Nam: Nha Trang	Viet Nam	Homo sapiens	blood	2018-12-07	Dengue virus type I isolate DET-P-0374-1 polyprotein (POLY) gene, partial cds
OQ426641	Ashall,J., Shah,S., Biggs,J.R., Chang,R., Jafari,Y., Brady,O.J., Mai,H.K., Lien,L.T., Thai,H.D., Nhuyen,H.A.T., Anh,D., Iwasaki,C., Kitamura,N., Van Loock,M., Herrera-Taracena,G., Rasschaert,F., Van Wesenbeeck,L., Yoshida,L.-M., Hafalla,J.C.R., Hue,S., Hibberd,M.L.	2023-02-17 21:00:00	DET-P-0372-1	Dengue virus	Flavivirus	Flaviviridae	ssRNA(+)	10176	GenBank	partial		Viet Nam: Nha Trang	Viet Nam	Homo sapiens	blood	2018-12-07	Dengue virus type I isolate DET-P-0372-1 polyprotein (POLY) gene, partial cds
OQ426640	Ashall,J., Shah,S., Biggs,J.R., Chang,R., Jafari,Y., Brady,O.J., Mai,H.K., Lien,L.T., Thai,H.D., Nhuyen,H.A.T., Anh,D., Iwasaki,C., Kitamura,N., Van Loock,M., Herrera-Taracena,G., Rasschaert,F., Van Wesenbeeck,L., Yoshida,L.-M., Hafalla,J.C.R., Hue,S., Hibberd,M.L.	2023-02-17 21:00:00	DET-P-0369-1	Dengue virus	Flavivirus	Flaviviridae	ssRNA(+)	10176	GenBank	partial		Viet Nam: Nha Trang	Viet Nam	Homo sapiens	blood	2018-12-07	Dengue virus type I isolate DET-P-0369-1 polyprotein (POLY) gene, partial cds
OQ426639	Ashall,J., Shah,S., Biggs,J.R., Chang,R., Jafari,Y., Brady,O.J., Mai,H.K., Lien,L.T., Thai,H.D., Nhuyen,H.A.T., Anh,D., Iwasaki,C., Kitamura,N., Van Loock,M., Herrera-Taracena,G., Rasschaert,F., Van Wesenbeeck,L., Yoshida,L.-M., Hafalla,J.C.R., Hue,S., Hibberd,M.L.	2023-02-17 21:00:00	DEN-P-1751-1	Dengue virus	Flavivirus	Flaviviridae	ssRNA(+)	10176	GenBank	partial		Viet Nam: Nha Trang	Viet Nam	Homo sapiens	blood	2019-04-10	Dengue virus type I isolate DEN-P-1751-1 polyprotein (POLY) gene, partial cds
OQ426638	Ashall,J., Shah,S., Biggs,J.R., Chang,R., Jafari,Y., Brady,O.J., Mai,H.K., Lien,L.T., Thai,H.D., Nhuyen,H.A.T., Anh,D., Iwasaki,C., Kitamura,N., Van Loock,M., Herrera-Taracena,G., Rasschaert,F., Van Wesenbeeck,L., Yoshida,L.-M., Hafalla,J.C.R., Hue,S., Hibberd,M.L.	2023-02-17 21:00:00	DEN-P-1624-1	Dengue virus	Flavivirus	Flaviviridae	ssRNA(+)	10176	GenBank	partial		Viet Nam: Nha Trang	Viet Nam	Homo sapiens	blood	2019-03-04	Dengue virus type I isolate DEN-P-1624-1 polyprotein (POLY) gene, partial cds
OQ426637	Ashall,J., Shah,S., Biggs,J.R., Chang,R., Jafari,Y., Brady,O.J., Mai,H.K., Lien,L.T., Thai,H.D., Nhuyen,H.A.T., Anh,D., Iwasaki,C., Kitamura,N., Van Loock,M., Herrera-Taracena,G., Rasschaert,F., Van Wesenbeeck,L., Yoshida,L.-M., Hafalla,J.C.R., Hue,S., Hibberd,M.L.	2023-02-17 21:00:00	DEN-P-1607-1	Dengue virus	Flavivirus	Flaviviridae	ssRNA(+)	10176	GenBank	partial		Viet Nam: Nha Trang	Viet Nam	Homo sapiens	blood	2019-02-28	Dengue virus type I isolate DEN-P-1607-1 polyprotein (POLY) gene, partial cds
OQ426636	Ashall,J., Shah,S., Biggs,J.R., Chang,R., Jafari,Y., Brady,O.J., Mai,H.K., Lien,L.T., Thai,H.D., Nhuyen,H.A.T., Anh,D., Iwasaki,C., Kitamura,N., Van Loock,M., Herrera-Taracena,G., Rasschaert,F., Van Wesenbeeck,L., Yoshida,L.-M., Hafalla,J.C.R., Hue,S., Hibberd,M.L.	2023-02-17 21:00:00	DEN-P-1592-1	Dengue virus	Flavivirus	Flaviviridae	ssRNA(+)	10176	GenBank	partial		Viet Nam: Nha Trang	Viet Nam	Homo sapiens	blood	2019-02-25	Dengue virus type I isolate DEN-P-1592-1 polyprotein (POLY) gene, partial cds
OQ426635	Ashall,J., Shah,S., Biggs,J.R., Chang,R., Jafari,Y., Brady,O.J., Mai,H.K., Lien,L.T., Thai,H.D., Nhuyen,H.A.T., Anh,D., Iwasaki,C., Kitamura,N., Van Loock,M., Herrera-Taracena,G., Rasschaert,F., Van Wesenbeeck,L., Yoshida,L.-M., Hafalla,J.C.R., Hue,S., Hibberd,M.L.	2023-02-17 21:00:00	DEN-P-1590-1	Dengue virus	Flavivirus	Flaviviridae	ssRNA(+)	10176	GenBank	partial		Viet Nam: Nha Trang	Viet Nam	Homo sapiens	blood	2019-02-25	Dengue virus type I isolate DEN-P-1590-1 polyprotein (POLY) gene, partial cds
OQ426634	Ashall,J., Shah,S., Biggs,J.R., Chang,R., Jafari,Y., Brady,O.J., Mai,H.K., Lien,L.T., Thai,H.D., Nhuyen,H.A.T., Anh,D., Iwasaki,C., Kitamura,N., Van Loock,M., Herrera-Taracena,G., Rasschaert,F., Van Wesenbeeck,L., Yoshida,L.-M., Hafalla,J.C.R., Hue,S., Hibberd,M.L.	2023-02-17 21:00:00	DEN-P-1511-1	Dengue virus	Flavivirus	Flaviviridae	ssRNA(+)	10176	GenBank	partial		Viet Nam: Nha Trang	Viet Nam	Homo sapiens	blood	2019-01-21	Dengue virus type I isolate DEN-P-1511-1 polyprotein (POLY) gene, partial cds
OQ426633	Ashall,J., Shah,S., Biggs,J.R., Chang,R., Jafari,Y., Brady,O.J., Mai,H.K., Lien,L.T., Thai,H.D., Nhuyen,H.A.T., Anh,D., Iwasaki,C., Kitamura,N., Van Loock,M., Herrera-Taracena,G., Rasschaert,F., Van Wesenbeeck,L., Yoshida,L.-M., Hafalla,J.C.R., Hue,S., Hibberd,M.L.	2023-02-17 21:00:00	DEN-P-1510-1	Dengue virus	Flavivirus	Flaviviridae	ssRNA(+)	10176	GenBank	partial		Viet Nam: Nha Trang	Viet Nam	Homo sapiens	blood	2019-01-21	Dengue virus type I isolate DEN-P-1510-1 polyprotein (POLY) gene, partial cds
OQ426632	Ashall,J., Shah,S., Biggs,J.R., Chang,R., Jafari,Y., Brady,O.J., Mai,H.K., Lien,L.T., Thai,H.D., Nhuyen,H.A.T., Anh,D., Iwasaki,C., Kitamura,N., Van Loock,M., Herrera-Taracena,G., Rasschaert,F., Van Wesenbeeck,L., Yoshida,L.-M., Hafalla,J.C.R., Hue,S., Hibberd,M.L.	2023-02-17 21:00:00	DEN-P-1509-1	Dengue virus	Flavivirus	Flaviviridae	ssRNA(+)	10176	GenBank	partial		Viet Nam: Nha Trang	Viet Nam	Homo sapiens	blood	2019-01-21	Dengue virus type I isolate DEN-P-1509-1 polyprotein (POLY) gene, partial cds
OQ426631	Ashall,J., Shah,S., Biggs,J.R., Chang,R., Jafari,Y., Brady,O.J., Mai,H.K., Lien,L.T., Thai,H.D., Nhuyen,H.A.T., Anh,D., Iwasaki,C., Kitamura,N., Van Loock,M., Herrera-Taracena,G., Rasschaert,F., Van Wesenbeeck,L., Yoshida,L.-M., Hafalla,J.C.R., Hue,S., Hibberd,M.L.	2023-02-17 21:00:00	DEN-P-1502-1	Dengue virus	Flavivirus	Flaviviridae	ssRNA(+)	10176	GenBank	partial		Viet Nam: Nha Trang	Viet Nam	Homo sapiens	blood	2019-01-18	Dengue virus type I isolate DEN-P-1502-1 polyprotein (POLY) gene, partial cds
OQ426630	Ashall,J., Shah,S., Biggs,J.R., Chang,R., Jafari,Y., Brady,O.J., Mai,H.K., Lien,L.T., Thai,H.D., Nhuyen,H.A.T., Anh,D., Iwasaki,C., Kitamura,N., Van Loock,M., Herrera-Taracena,G., Rasschaert,F., Van Wesenbeeck,L., Yoshida,L.-M., Hafalla,J.C.R., Hue,S., Hibberd,M.L.	2023-02-17 21:00:00	DEN-P-1460-1	Dengue virus	Flavivirus	Flaviviridae	ssRNA(+)	10176	GenBank	partial		Viet Nam: Nha Trang	Viet Nam	Homo sapiens	blood	2019-01-14	Dengue virus type I isolate DEN-P-1460-1 polyprotein (POLY) gene, partial cds
OQ426629	Ashall,J., Shah,S., Biggs,J.R., Chang,R., Jafari,Y., Brady,O.J., Mai,H.K., Lien,L.T., Thai,H.D., Nhuyen,H.A.T., Anh,D., Iwasaki,C., Kitamura,N., Van Loock,M., Herrera-Taracena,G., Rasschaert,F., Van Wesenbeeck,L., Yoshida,L.-M., Hafalla,J.C.R., Hue,S., Hibberd,M.L.	2023-02-17 21:00:00	DEN-P-1459-1	Dengue virus	Flavivirus	Flaviviridae	ssRNA(+)	10176	GenBank	partial		Viet Nam: Nha Trang	Viet Nam	Homo sapiens	blood	2019-01-14	Dengue virus type I isolate DEN-P-1459-1 polyprotein (POLY) gene, partial cds
OQ426628	Ashall,J., Shah,S., Biggs,J.R., Chang,R., Jafari,Y., Brady,O.J., Mai,H.K., Lien,L.T., Thai,H.D., Nhuyen,H.A.T., Anh,D., Iwasaki,C., Kitamura,N., Van Loock,M., Herrera-Taracena,G., Rasschaert,F., Van Wesenbeeck,L., Yoshida,L.-M., Hafalla,J.C.R., Hue,S., Hibberd,M.L.	2023-02-17 21:00:00	DEN-P-1450-1	Dengue virus	Flavivirus	Flaviviridae	ssRNA(+)	10176	GenBank	partial		Viet Nam: Nha Trang	Viet Nam	Homo sapiens	blood	2019-01-11	Dengue virus type I isolate DEN-P-1450-1 polyprotein (POLY) gene, partial cds
OQ426627	Ashall,J., Shah,S., Biggs,J.R., Chang,R., Jafari,Y., Brady,O.J., Mai,H.K., Lien,L.T., Thai,H.D., Nhuyen,H.A.T., Anh,D., Iwasaki,C., Kitamura,N., Van Loock,M., Herrera-Taracena,G., Rasschaert,F., Van Wesenbeeck,L., Yoshida,L.-M., Hafalla,J.C.R., Hue,S., Hibberd,M.L.	2023-02-17 21:00:00	DEN-P-1436-1	Dengue virus	Flavivirus	Flaviviridae	ssRNA(+)	10176	GenBank	partial		Viet Nam: Nha Trang	Viet Nam	Homo sapiens	blood	2019-01-10	Dengue virus type I isolate DEN-P-1436-1 polyprotein (POLY) gene, partial cds
OQ426626	Ashall,J., Shah,S., Biggs,J.R., Chang,R., Jafari,Y., Brady,O.J., Mai,H.K., Lien,L.T., Thai,H.D., Nhuyen,H.A.T., Anh,D., Iwasaki,C., Kitamura,N., Van Loock,M., Herrera-Taracena,G., Rasschaert,F., Van Wesenbeeck,L., Yoshida,L.-M., Hafalla,J.C.R., Hue,S., Hibberd,M.L.	2023-02-17 21:00:00	DEN-P-1433-1	Dengue virus	Flavivirus	Flaviviridae	ssRNA(+)	10176	GenBank	partial		Viet Nam: Nha Trang	Viet Nam	Homo sapiens	blood	2019-01-10	Dengue virus type I isolate DEN-P-1433-1 polyprotein (POLY) gene, partial cds
OQ426625	Ashall,J., Shah,S., Biggs,J.R., Chang,R., Jafari,Y., Brady,O.J., Mai,H.K., Lien,L.T., Thai,H.D., Nhuyen,H.A.T., Anh,D., Iwasaki,C., Kitamura,N., Van Loock,M., Herrera-Taracena,G., Rasschaert,F., Van Wesenbeeck,L., Yoshida,L.-M., Hafalla,J.C.R., Hue,S., Hibberd,M.L.	2023-02-17 21:00:00	DEN-P-1420-1	Dengue virus	Flavivirus	Flaviviridae	ssRNA(+)	10176	GenBank	partial		Viet Nam: Nha Trang	Viet Nam	Homo sapiens	blood	2019-01-09	Dengue virus type I isolate DEN-P-1420-1 polyprotein (POLY) gene, partial cds
OQ426624	Ashall,J., Shah,S., Biggs,J.R., Chang,R., Jafari,Y., Brady,O.J., Mai,H.K., Lien,L.T., Thai,H.D., Nhuyen,H.A.T., Anh,D., Iwasaki,C., Kitamura,N., Van Loock,M., Herrera-Taracena,G., Rasschaert,F., Van Wesenbeeck,L., Yoshida,L.-M., Hafalla,J.C.R., Hue,S., Hibberd,M.L.	2023-02-17 21:00:00	DEN-P-1415-1	Dengue virus	Flavivirus	Flaviviridae	ssRNA(+)	10176	GenBank	partial		Viet Nam: Nha Trang	Viet Nam	Homo sapiens	blood	2019-01-08	Dengue virus type I isolate DEN-P-1415-1 polyprotein (POLY) gene, partial cds
OQ426623	Ashall,J., Shah,S., Biggs,J.R., Chang,R., Jafari,Y., Brady,O.J., Mai,H.K., Lien,L.T., Thai,H.D., Nhuyen,H.A.T., Anh,D., Iwasaki,C., Kitamura,N., Van Loock,M., Herrera-Taracena,G., Rasschaert,F., Van Wesenbeeck,L., Yoshida,L.-M., Hafalla,J.C.R., Hue,S., Hibberd,M.L.	2023-02-17 21:00:00	DEN-P-1412-1	Dengue virus	Flavivirus	Flaviviridae	ssRNA(+)	10176	GenBank	partial		Viet Nam: Nha Trang	Viet Nam	Homo sapiens	blood	2019-01-07	Dengue virus type I isolate DEN-P-1412-1 polyprotein (POLY) gene, partial cds
OQ426622	Ashall,J., Shah,S., Biggs,J.R., Chang,R., Jafari,Y., Brady,O.J., Mai,H.K., Lien,L.T., Thai,H.D., Nhuyen,H.A.T., Anh,D., Iwasaki,C., Kitamura,N., Van Loock,M., Herrera-Taracena,G., Rasschaert,F., Van Wesenbeeck,L., Yoshida,L.-M., Hafalla,J.C.R., Hue,S., Hibberd,M.L.	2023-02-17 21:00:00	DEN-P-1407-1	Dengue virus	Flavivirus	Flaviviridae	ssRNA(+)	10176	GenBank	partial		Viet Nam: Nha Trang	Viet Nam	Homo sapiens	blood	2019-01-07	Dengue virus type I isolate DEN-P-1407-1 polyprotein (POLY) gene, partial cds
OQ426621	Ashall,J., Shah,S., Biggs,J.R., Chang,R., Jafari,Y., Brady,O.J., Mai,H.K., Lien,L.T., Thai,H.D., Nhuyen,H.A.T., Anh,D., Iwasaki,C., Kitamura,N., Van Loock,M., Herrera-Taracena,G., Rasschaert,F., Van Wesenbeeck,L., Yoshida,L.-M., Hafalla,J.C.R., Hue,S., Hibberd,M.L.	2023-02-17 21:00:00	DEN-P-1340-1	Dengue virus	Flavivirus	Flaviviridae	ssRNA(+)	10176	GenBank	partial		Viet Nam: Nha Trang	Viet Nam	Homo sapiens	blood	2018-12-21	Dengue virus type I isolate DEN-P-1340-1 polyprotein (POLY) gene, partial cds
OQ426620	Ashall,J., Shah,S., Biggs,J.R., Chang,R., Jafari,Y., Brady,O.J., Mai,H.K., Lien,L.T., Thai,H.D., Nhuyen,H.A.T., Anh,D., Iwasaki,C., Kitamura,N., Van Loock,M., Herrera-Taracena,G., Rasschaert,F., Van Wesenbeeck,L., Yoshida,L.-M., Hafalla,J.C.R., Hue,S., Hibberd,M.L.	2023-02-17 21:00:00	DEN-P-1332-1	Dengue virus	Flavivirus	Flaviviridae	ssRNA(+)	10176	GenBank	partial		Viet Nam: Nha Trang	Viet Nam	Homo sapiens	blood	2018-12-19	Dengue virus type I isolate DEN-P-1332-1 polyprotein (POLY) gene, partial cds
OQ426619	Ashall,J., Shah,S., Biggs,J.R., Chang,R., Jafari,Y., Brady,O.J., Mai,H.K., Lien,L.T., Thai,H.D., Nhuyen,H.A.T., Anh,D., Iwasaki,C., Kitamura,N., Van Loock,M., Herrera-Taracena,G., Rasschaert,F., Van Wesenbeeck,L., Yoshida,L.-M., Hafalla,J.C.R., Hue,S., Hibberd,M.L.	2023-02-17 21:00:00	DEN-P-1321-1	Dengue virus	Flavivirus	Flaviviridae	ssRNA(+)	10176	GenBank	partial		Viet Nam: Nha Trang	Viet Nam	Homo sapiens	blood	2018-12-19	Dengue virus type I isolate DEN-P-1321-1 polyprotein (POLY) gene, partial cds
OQ426618	Ashall,J., Shah,S., Biggs,J.R., Chang,R., Jafari,Y., Brady,O.J., Mai,H.K., Lien,L.T., Thai,H.D., Nhuyen,H.A.T., Anh,D., Iwasaki,C., Kitamura,N., Van Loock,M., Herrera-Taracena,G., Rasschaert,F., Van Wesenbeeck,L., Yoshida,L.-M., Hafalla,J.C.R., Hue,S., Hibberd,M.L.	2023-02-17 21:00:00	DEN-P-1319-1	Dengue virus	Flavivirus	Flaviviridae	ssRNA(+)	10176	GenBank	partial		Viet Nam: Nha Trang	Viet Nam	Homo sapiens	blood	2018-12-18	Dengue virus type I isolate DEN-P-1319-1 polyprotein (POLY) gene, partial cds
OQ426617	Ashall,J., Shah,S., Biggs,J.R., Chang,R., Jafari,Y., Brady,O.J., Mai,H.K., Lien,L.T., Thai,H.D., Nhuyen,H.A.T., Anh,D., Iwasaki,C., Kitamura,N., Van Loock,M., Herrera-Taracena,G., Rasschaert,F., Van Wesenbeeck,L., Yoshida,L.-M., Hafalla,J.C.R., Hue,S., Hibberd,M.L.	2023-02-17 21:00:00	DEN-P-1311-1	Dengue virus	Flavivirus	Flaviviridae	ssRNA(+)	10176	GenBank	partial		Viet Nam: Nha Trang	Viet Nam	Homo sapiens	blood	2018-12-18	Dengue virus type I isolate DEN-P-1311-1 polyprotein (POLY) gene, partial cds
OQ426616	Ashall,J., Shah,S., Biggs,J.R., Chang,R., Jafari,Y., Brady,O.J., Mai,H.K., Lien,L.T., Thai,H.D., Nhuyen,H.A.T., Anh,D., Iwasaki,C., Kitamura,N., Van Loock,M., Herrera-Taracena,G., Rasschaert,F., Van Wesenbeeck,L., Yoshida,L.-M., Hafalla,J.C.R., Hue,S., Hibberd,M.L.	2023-02-17 21:00:00	DEN-P-1307-1	Dengue virus	Flavivirus	Flaviviridae	ssRNA(+)	10176	GenBank	partial		Viet Nam: Nha Trang	Viet Nam	Homo sapiens	blood	2018-12-17	Dengue virus type I isolate DEN-P-1307-1 polyprotein (POLY) gene, partial cds
OQ426615	Ashall,J., Shah,S., Biggs,J.R., Chang,R., Jafari,Y., Brady,O.J., Mai,H.K., Lien,L.T., Thai,H.D., Nhuyen,H.A.T., Anh,D., Iwasaki,C., Kitamura,N., Van Loock,M., Herrera-Taracena,G., Rasschaert,F., Van Wesenbeeck,L., Yoshida,L.-M., Hafalla,J.C.R., Hue,S., Hibberd,M.L.	2023-02-17 21:00:00	DEN-P-1295-1	Dengue virus	Flavivirus	Flaviviridae	ssRNA(+)	10176	GenBank	partial		Viet Nam: Nha Trang	Viet Nam	Homo sapiens	blood	2018-12-14	Dengue virus type I isolate DEN-P-1295-1 polyprotein (POLY) gene, partial cds
OQ426614	Ashall,J., Shah,S., Biggs,J.R., Chang,R., Jafari,Y., Brady,O.J., Mai,H.K., Lien,L.T., Thai,H.D., Nhuyen,H.A.T., Anh,D., Iwasaki,C., Kitamura,N., Van Loock,M., Herrera-Taracena,G., Rasschaert,F., Van Wesenbeeck,L., Yoshida,L.-M., Hafalla,J.C.R., Hue,S., Hibberd,M.L.	2023-02-17 21:00:00	DEN-P-1287-1	Dengue virus	Flavivirus	Flaviviridae	ssRNA(+)	10176	GenBank	partial		Viet Nam: Nha Trang	Viet Nam	Homo sapiens	blood	2018-12-13	Dengue virus type I isolate DEN-P-1287-1 polyprotein (POLY) gene, partial cds
OQ426613	Ashall,J., Shah,S., Biggs,J.R., Chang,R., Jafari,Y., Brady,O.J., Mai,H.K., Lien,L.T., Thai,H.D., Nhuyen,H.A.T., Anh,D., Iwasaki,C., Kitamura,N., Van Loock,M., Herrera-Taracena,G., Rasschaert,F., Van Wesenbeeck,L., Yoshida,L.-M., Hafalla,J.C.R., Hue,S., Hibberd,M.L.	2023-02-17 21:00:00	DEN-P-1256-1	Dengue virus	Flavivirus	Flaviviridae	ssRNA(+)	10176	GenBank	partial		Viet Nam: Nha Trang	Viet Nam	Homo sapiens	blood	2018-12-10	Dengue virus type I isolate DEN-P-1256-1 polyprotein (POLY) gene, partial cds
OQ426612	Ashall,J., Shah,S., Biggs,J.R., Chang,R., Jafari,Y., Brady,O.J., Mai,H.K., Lien,L.T., Thai,H.D., Nhuyen,H.A.T., Anh,D., Iwasaki,C., Kitamura,N., Van Loock,M., Herrera-Taracena,G., Rasschaert,F., Van Wesenbeeck,L., Yoshida,L.-M., Hafalla,J.C.R., Hue,S., Hibberd,M.L.	2023-02-17 21:00:00	DEN-P-1241-1	Dengue virus	Flavivirus	Flaviviridae	ssRNA(+)	10176	GenBank	partial		Viet Nam: Nha Trang	Viet Nam	Homo sapiens	blood	2018-12-06	Dengue virus type I isolate DEN-P-1241-1 polyprotein (POLY) gene, partial cds
OQ426611	Ashall,J., Shah,S., Biggs,J.R., Chang,R., Jafari,Y., Brady,O.J., Mai,H.K., Lien,L.T., Thai,H.D., Nhuyen,H.A.T., Anh,D., Iwasaki,C., Kitamura,N., Van Loock,M., Herrera-Taracena,G., Rasschaert,F., Van Wesenbeeck,L., Yoshida,L.-M., Hafalla,J.C.R., Hue,S., Hibberd,M.L.	2023-02-17 21:00:00	DEN-P-1231-1	Dengue virus	Flavivirus	Flaviviridae	ssRNA(+)	10176	GenBank	partial		Viet Nam: Nha Trang	Viet Nam	Homo sapiens	blood	2018-12-05	Dengue virus type I isolate DEN-P-1231-1 polyprotein (POLY) gene, partial cds
OQ426610	Ashall,J., Shah,S., Biggs,J.R., Chang,R., Jafari,Y., Brady,O.J., Mai,H.K., Lien,L.T., Thai,H.D., Nhuyen,H.A.T., Anh,D., Iwasaki,C., Kitamura,N., Van Loock,M., Herrera-Taracena,G., Rasschaert,F., Van Wesenbeeck,L., Yoshida,L.-M., Hafalla,J.C.R., Hue,S., Hibberd,M.L.	2023-02-17 21:00:00	DEN-P-1221-1	Dengue virus	Flavivirus	Flaviviridae	ssRNA(+)	10176	GenBank	partial		Viet Nam: Nha Trang	Viet Nam	Homo sapiens	blood	2018-12-04	Dengue virus type I isolate DEN-P-1221-1 polyprotein (POLY) gene, partial cds
OQ426609	Ashall,J., Shah,S., Biggs,J.R., Chang,R., Jafari,Y., Brady,O.J., Mai,H.K., Lien,L.T., Thai,H.D., Nhuyen,H.A.T., Anh,D., Iwasaki,C., Kitamura,N., Van Loock,M., Herrera-Taracena,G., Rasschaert,F., Van Wesenbeeck,L., Yoshida,L.-M., Hafalla,J.C.R., Hue,S., Hibberd,M.L.	2023-02-17 21:00:00	DET-P-0487-1	Dengue virus	Flavivirus	Flaviviridae	ssRNA(+)	10176	GenBank	partial		Viet Nam: Nha Trang	Viet Nam	Homo sapiens	blood	2019-03-25	Dengue virus type I isolate DET-P-0487-1 polyprotein (POLY) gene, partial cds
OQ426608	Ashall,J., Shah,S., Biggs,J.R., Chang,R., Jafari,Y., Brady,O.J., Mai,H.K., Lien,L.T., Thai,H.D., Nhuyen,H.A.T., Anh,D., Iwasaki,C., Kitamura,N., Van Loock,M., Herrera-Taracena,G., Rasschaert,F., Van Wesenbeeck,L., Yoshida,L.-M., Hafalla,J.C.R., Hue,S., Hibberd,M.L.	2023-02-17 21:00:00	DET-P-0185-1	Dengue virus	Flavivirus	Flaviviridae	ssRNA(+)	10176	GenBank	partial		Viet Nam: Nha Trang	Viet Nam	Homo sapiens	blood	2018-08-20	Dengue virus type I isolate DET-P-0185-1 polyprotein (POLY) gene, partial cds
OQ426607	Ashall,J., Shah,S., Biggs,J.R., Chang,R., Jafari,Y., Brady,O.J., Mai,H.K., Lien,L.T., Thai,H.D., Nhuyen,H.A.T., Anh,D., Iwasaki,C., Kitamura,N., Van Loock,M., Herrera-Taracena,G., Rasschaert,F., Van Wesenbeeck,L., Yoshida,L.-M., Hafalla,J.C.R., Hue,S., Hibberd,M.L.	2023-02-17 21:00:00	DEN-F-0231-01-1	Dengue virus	Flavivirus	Flaviviridae	ssRNA(+)	10176	GenBank	partial		Viet Nam: Nha Trang	Viet Nam	Homo sapiens	blood	2019-01-08	Dengue virus type I isolate DEN-F-0231-01-1 polyprotein (POLY) gene, partial cds
OQ426606	Ashall,J., Shah,S., Biggs,J.R., Chang,R., Jafari,Y., Brady,O.J., Mai,H.K., Lien,L.T., Thai,H.D., Nhuyen,H.A.T., Anh,D., Iwasaki,C., Kitamura,N., Van Loock,M., Herrera-Taracena,G., Rasschaert,F., Van Wesenbeeck,L., Yoshida,L.-M., Hafalla,J.C.R., Hue,S., Hibberd,M.L.	2023-02-17 21:00:00	DEN-F-0132-01-1	Dengue virus	Flavivirus	Flaviviridae	ssRNA(+)	10176	GenBank	partial		Viet Nam: Nha Trang	Viet Nam	Homo sapiens	blood	2018-11-19	Dengue virus type I isolate DEN-F-0132-01-1 polyprotein (POLY) gene, partial cds
OQ426605	Ashall,J., Shah,S., Biggs,J.R., Chang,R., Jafari,Y., Brady,O.J., Mai,H.K., Lien,L.T., Thai,H.D., Nhuyen,H.A.T., Anh,D., Iwasaki,C., Kitamura,N., Van Loock,M., Herrera-Taracena,G., Rasschaert,F., Van Wesenbeeck,L., Yoshida,L.-M., Hafalla,J.C.R., Hue,S., Hibberd,M.L.	2023-02-17 21:00:00	DEN-F-0104-02-1	Dengue virus	Flavivirus	Flaviviridae	ssRNA(+)	10176	GenBank	partial		Viet Nam: Nha Trang	Viet Nam	Homo sapiens	blood	2018-11-02	Dengue virus type I isolate DEN-F-0104-02-1 polyprotein (POLY) gene, partial cds
OQ426604	Ashall,J., Shah,S., Biggs,J.R., Chang,R., Jafari,Y., Brady,O.J., Mai,H.K., Lien,L.T., Thai,H.D., Nhuyen,H.A.T., Anh,D., Iwasaki,C., Kitamura,N., Van Loock,M., Herrera-Taracena,G., Rasschaert,F., Van Wesenbeeck,L., Yoshida,L.-M., Hafalla,J.C.R., Hue,S., Hibberd,M.L.	2023-02-17 21:00:00	DET-P-0495-1	Dengue virus	Flavivirus	Flaviviridae	ssRNA(+)	10088	GenBank	partial		Viet Nam: Nha Trang	Viet Nam	Homo sapiens	blood	2019-04-23	Dengue virus type I isolate DET-P-0495-1 polyprotein (POLY) gene, partial cds
OQ426603	Ashall,J., Shah,S., Biggs,J.R., Chang,R., Jafari,Y., Brady,O.J., Mai,H.K., Lien,L.T., Thai,H.D., Nhuyen,H.A.T., Anh,D., Iwasaki,C., Kitamura,N., Van Loock,M., Herrera-Taracena,G., Rasschaert,F., Van Wesenbeeck,L., Yoshida,L.-M., Hafalla,J.C.R., Hue,S., Hibberd,M.L.	2023-02-17 21:00:00	DET-P-0472-1	Dengue virus	Flavivirus	Flaviviridae	ssRNA(+)	10176	GenBank	partial		Viet Nam: Nha Trang	Viet Nam	Homo sapiens	blood	2019-02-22	Dengue virus type I isolate DET-P-0472-1 polyprotein (POLY) gene, partial cds
OQ426602	Ashall,J., Shah,S., Biggs,J.R., Chang,R., Jafari,Y., Brady,O.J., Mai,H.K., Lien,L.T., Thai,H.D., Nhuyen,H.A.T., Anh,D., Iwasaki,C., Kitamura,N., Van Loock,M., Herrera-Taracena,G., Rasschaert,F., Van Wesenbeeck,L., Yoshida,L.-M., Hafalla,J.C.R., Hue,S., Hibberd,M.L.	2023-02-17 21:00:00	DET-P-0469-1	Dengue virus	Flavivirus	Flaviviridae	ssRNA(+)	10176	GenBank	partial		Viet Nam: Nha Trang	Viet Nam	Homo sapiens	blood	2019-02-22	Dengue virus type I isolate DET-P-0469-1 polyprotein (POLY) gene, partial cds
OQ426601	Ashall,J., Shah,S., Biggs,J.R., Chang,R., Jafari,Y., Brady,O.J., Mai,H.K., Lien,L.T., Thai,H.D., Nhuyen,H.A.T., Anh,D., Iwasaki,C., Kitamura,N., Van Loock,M., Herrera-Taracena,G., Rasschaert,F., Van Wesenbeeck,L., Yoshida,L.-M., Hafalla,J.C.R., Hue,S., Hibberd,M.L.	2023-02-17 21:00:00	DET-P-0465-1	Dengue virus	Flavivirus	Flaviviridae	ssRNA(+)	10176	GenBank	partial		Viet Nam: Nha Trang	Viet Nam	Homo sapiens	blood	2019-02-18	Dengue virus type I isolate DET-P-0465-1 polyprotein (POLY) gene, partial cds
OQ426600	Ashall,J., Shah,S., Biggs,J.R., Chang,R., Jafari,Y., Brady,O.J., Mai,H.K., Lien,L.T., Thai,H.D., Nhuyen,H.A.T., Anh,D., Iwasaki,C., Kitamura,N., Van Loock,M., Herrera-Taracena,G., Rasschaert,F., Van Wesenbeeck,L., Yoshida,L.-M., Hafalla,J.C.R., Hue,S., Hibberd,M.L.	2023-02-17 21:00:00	DET-P-0439-1	Dengue virus	Flavivirus	Flaviviridae	ssRNA(+)	10176	GenBank	partial		Viet Nam: Nha Trang	Viet Nam	Homo sapiens	blood	2019-01-08	Dengue virus type I isolate DET-P-0439-1 polyprotein (POLY) gene, partial cds
OQ426599	Ashall,J., Shah,S., Biggs,J.R., Chang,R., Jafari,Y., Brady,O.J., Mai,H.K., Lien,L.T., Thai,H.D., Nhuyen,H.A.T., Anh,D., Iwasaki,C., Kitamura,N., Van Loock,M., Herrera-Taracena,G., Rasschaert,F., Van Wesenbeeck,L., Yoshida,L.-M., Hafalla,J.C.R., Hue,S., Hibberd,M.L.	2023-02-17 21:00:00	DET-P-0430-1	Dengue virus	Flavivirus	Flaviviridae	ssRNA(+)	10176	GenBank	partial		Viet Nam: Nha Trang	Viet Nam	Homo sapiens	blood	2018-12-26	Dengue virus type I isolate DET-P-0430-1 polyprotein (POLY) gene, partial cds
OQ426598	Ashall,J., Shah,S., Biggs,J.R., Chang,R., Jafari,Y., Brady,O.J., Mai,H.K., Lien,L.T., Thai,H.D., Nhuyen,H.A.T., Anh,D., Iwasaki,C., Kitamura,N., Van Loock,M., Herrera-Taracena,G., Rasschaert,F., Van Wesenbeeck,L., Yoshida,L.-M., Hafalla,J.C.R., Hue,S., Hibberd,M.L.	2023-02-17 21:00:00	DET-P-0422-1	Dengue virus	Flavivirus	Flaviviridae	ssRNA(+)	10176	GenBank	partial		Viet Nam: Nha Trang	Viet Nam	Homo sapiens	blood	2018-12-24	Dengue virus type I isolate DET-P-0422-1 polyprotein (POLY) gene, partial cds
OQ426597	Ashall,J., Shah,S., Biggs,J.R., Chang,R., Jafari,Y., Brady,O.J., Mai,H.K., Lien,L.T., Thai,H.D., Nhuyen,H.A.T., Anh,D., Iwasaki,C., Kitamura,N., Van Loock,M., Herrera-Taracena,G., Rasschaert,F., Van Wesenbeeck,L., Yoshida,L.-M., Hafalla,J.C.R., Hue,S., Hibberd,M.L.	2023-02-17 21:00:00	DET-P-0411-1	Dengue virus	Flavivirus	Flaviviridae	ssRNA(+)	10176	GenBank	partial		Viet Nam: Nha Trang	Viet Nam	Homo sapiens	blood	2018-12-20	Dengue virus type I isolate DET-P-0411-1 polyprotein (POLY) gene, partial cds
OQ426596	Ashall,J., Shah,S., Biggs,J.R., Chang,R., Jafari,Y., Brady,O.J., Mai,H.K., Lien,L.T., Thai,H.D., Nhuyen,H.A.T., Anh,D., Iwasaki,C., Kitamura,N., Van Loock,M., Herrera-Taracena,G., Rasschaert,F., Van Wesenbeeck,L., Yoshida,L.-M., Hafalla,J.C.R., Hue,S., Hibberd,M.L.	2023-02-17 21:00:00	DET-P-0382-1	Dengue virus	Flavivirus	Flaviviridae	ssRNA(+)	10176	GenBank	partial		Viet Nam: Nha Trang	Viet Nam	Homo sapiens	blood	2018-12-12	Dengue virus type I isolate DET-P-0382-1 polyprotein (POLY) gene, partial cds
OQ426595	Ashall,J., Shah,S., Biggs,J.R., Chang,R., Jafari,Y., Brady,O.J., Mai,H.K., Lien,L.T., Thai,H.D., Nhuyen,H.A.T., Anh,D., Iwasaki,C., Kitamura,N., Van Loock,M., Herrera-Taracena,G., Rasschaert,F., Van Wesenbeeck,L., Yoshida,L.-M., Hafalla,J.C.R., Hue,S., Hibberd,M.L.	2023-02-17 21:00:00	DET-P-0371-1	Dengue virus	Flavivirus	Flaviviridae	ssRNA(+)	10176	GenBank	partial		Viet Nam: Nha Trang	Viet Nam	Homo sapiens	blood	2018-12-07	Dengue virus type I isolate DET-P-0371-1 polyprotein (POLY) gene, partial cds
OQ426594	Ashall,J., Shah,S., Biggs,J.R., Chang,R., Jafari,Y., Brady,O.J., Mai,H.K., Lien,L.T., Thai,H.D., Nhuyen,H.A.T., Anh,D., Iwasaki,C., Kitamura,N., Van Loock,M., Herrera-Taracena,G., Rasschaert,F., Van Wesenbeeck,L., Yoshida,L.-M., Hafalla,J.C.R., Hue,S., Hibberd,M.L.	2023-02-17 21:00:00	DET-P-0368-1	Dengue virus	Flavivirus	Flaviviridae	ssRNA(+)	10176	GenBank	partial		Viet Nam: Nha Trang	Viet Nam	Homo sapiens	blood	2018-12-06	Dengue virus type I isolate DET-P-0368-1 polyprotein (POLY) gene, partial cds
OQ426593	Ashall,J., Shah,S., Biggs,J.R., Chang,R., Jafari,Y., Brady,O.J., Mai,H.K., Lien,L.T., Thai,H.D., Nhuyen,H.A.T., Anh,D., Iwasaki,C., Kitamura,N., Van Loock,M., Herrera-Taracena,G., Rasschaert,F., Van Wesenbeeck,L., Yoshida,L.-M., Hafalla,J.C.R., Hue,S., Hibberd,M.L.	2023-02-17 21:00:00	DET-P-0361-1	Dengue virus	Flavivirus	Flaviviridae	ssRNA(+)	10176	GenBank	partial		Viet Nam: Nha Trang	Viet Nam	Homo sapiens	blood	2018-12-04	Dengue virus type I isolate DET-P-0361-1 polyprotein (POLY) gene, partial cds
OQ426592	Ashall,J., Shah,S., Biggs,J.R., Chang,R., Jafari,Y., Brady,O.J., Mai,H.K., Lien,L.T., Thai,H.D., Nhuyen,H.A.T., Anh,D., Iwasaki,C., Kitamura,N., Van Loock,M., Herrera-Taracena,G., Rasschaert,F., Van Wesenbeeck,L., Yoshida,L.-M., Hafalla,J.C.R., Hue,S., Hibberd,M.L.	2023-02-17 21:00:00	DET-P-0354-1	Dengue virus	Flavivirus	Flaviviridae	ssRNA(+)	10176	GenBank	partial		Viet Nam: Nha Trang	Viet Nam	Homo sapiens	blood	2018-12-02	Dengue virus type I isolate DET-P-0354-1 polyprotein (POLY) gene, partial cds
OQ426591	Ashall,J., Shah,S., Biggs,J.R., Chang,R., Jafari,Y., Brady,O.J., Mai,H.K., Lien,L.T., Thai,H.D., Nhuyen,H.A.T., Anh,D., Iwasaki,C., Kitamura,N., Van Loock,M., Herrera-Taracena,G., Rasschaert,F., Van Wesenbeeck,L., Yoshida,L.-M., Hafalla,J.C.R., Hue,S., Hibberd,M.L.	2023-02-17 21:00:00	DET-P-0347-1	Dengue virus	Flavivirus	Flaviviridae	ssRNA(+)	10176	GenBank	partial		Viet Nam: Nha Trang	Viet Nam	Homo sapiens	blood	2018-11-28	Dengue virus type I isolate DET-P-0347-1 polyprotein (POLY) gene, partial cds
OQ426590	Ashall,J., Shah,S., Biggs,J.R., Chang,R., Jafari,Y., Brady,O.J., Mai,H.K., Lien,L.T., Thai,H.D., Nhuyen,H.A.T., Anh,D., Iwasaki,C., Kitamura,N., Van Loock,M., Herrera-Taracena,G., Rasschaert,F., Van Wesenbeeck,L., Yoshida,L.-M., Hafalla,J.C.R., Hue,S., Hibberd,M.L.	2023-02-17 21:00:00	DET-P-0333-1	Dengue virus	Flavivirus	Flaviviridae	ssRNA(+)	10176	GenBank	partial		Viet Nam: Nha Trang	Viet Nam	Homo sapiens	blood	2018-11-23	Dengue virus type I isolate DET-P-0333-1 polyprotein (POLY) gene, partial cds
OQ426589	Ashall,J., Shah,S., Biggs,J.R., Chang,R., Jafari,Y., Brady,O.J., Mai,H.K., Lien,L.T., Thai,H.D., Nhuyen,H.A.T., Anh,D., Iwasaki,C., Kitamura,N., Van Loock,M., Herrera-Taracena,G., Rasschaert,F., Van Wesenbeeck,L., Yoshida,L.-M., Hafalla,J.C.R., Hue,S., Hibberd,M.L.	2023-02-17 21:00:00	DET-P-0315-1	Dengue virus	Flavivirus	Flaviviridae	ssRNA(+)	10176	GenBank	partial		Viet Nam: Nha Trang	Viet Nam	Homo sapiens	blood	2018-11-19	Dengue virus type I isolate DET-P-0315-1 polyprotein (POLY) gene, partial cds
OQ426588	Ashall,J., Shah,S., Biggs,J.R., Chang,R., Jafari,Y., Brady,O.J., Mai,H.K., Lien,L.T., Thai,H.D., Nhuyen,H.A.T., Anh,D., Iwasaki,C., Kitamura,N., Van Loock,M., Herrera-Taracena,G., Rasschaert,F., Van Wesenbeeck,L., Yoshida,L.-M., Hafalla,J.C.R., Hue,S., Hibberd,M.L.	2023-02-17 21:00:00	DET-P-0299-1	Dengue virus	Flavivirus	Flaviviridae	ssRNA(+)	10176	GenBank	partial		Viet Nam: Nha Trang	Viet Nam	Homo sapiens	blood	2018-11-09	Dengue virus type I isolate DET-P-0299-1 polyprotein (POLY) gene, partial cds
OQ426587	Ashall,J., Shah,S., Biggs,J.R., Chang,R., Jafari,Y., Brady,O.J., Mai,H.K., Lien,L.T., Thai,H.D., Nhuyen,H.A.T., Anh,D., Iwasaki,C., Kitamura,N., Van Loock,M., Herrera-Taracena,G., Rasschaert,F., Van Wesenbeeck,L., Yoshida,L.-M., Hafalla,J.C.R., Hue,S., Hibberd,M.L.	2023-02-17 21:00:00	DET-P-0274-1	Dengue virus	Flavivirus	Flaviviridae	ssRNA(+)	10176	GenBank	partial		Viet Nam: Nha Trang	Viet Nam	Homo sapiens	blood	2018-10-29	Dengue virus type I isolate DET-P-0274-1 polyprotein (POLY) gene, partial cds
OQ426586	Ashall,J., Shah,S., Biggs,J.R., Chang,R., Jafari,Y., Brady,O.J., Mai,H.K., Lien,L.T., Thai,H.D., Nhuyen,H.A.T., Anh,D., Iwasaki,C., Kitamura,N., Van Loock,M., Herrera-Taracena,G., Rasschaert,F., Van Wesenbeeck,L., Yoshida,L.-M., Hafalla,J.C.R., Hue,S., Hibberd,M.L.	2023-02-17 21:00:00	DET-P-0251-1	Dengue virus	Flavivirus	Flaviviridae	ssRNA(+)	10176	GenBank	partial		Viet Nam: Nha Trang	Viet Nam	Homo sapiens	blood	2018-10-20	Dengue virus type I isolate DET-P-0251-1 polyprotein (POLY) gene, partial cds
OQ426585	Ashall,J., Shah,S., Biggs,J.R., Chang,R., Jafari,Y., Brady,O.J., Mai,H.K., Lien,L.T., Thai,H.D., Nhuyen,H.A.T., Anh,D., Iwasaki,C., Kitamura,N., Van Loock,M., Herrera-Taracena,G., Rasschaert,F., Van Wesenbeeck,L., Yoshida,L.-M., Hafalla,J.C.R., Hue,S., Hibberd,M.L.	2023-02-17 21:00:00	DEN-P-1579-1	Dengue virus	Flavivirus	Flaviviridae	ssRNA(+)	10176	GenBank	partial		Viet Nam: Nha Trang	Viet Nam	Homo sapiens	blood	2019-02-20	Dengue virus type I isolate DEN-P-1579-1 polyprotein (POLY) gene, partial cds
OQ426584	Ashall,J., Shah,S., Biggs,J.R., Chang,R., Jafari,Y., Brady,O.J., Mai,H.K., Lien,L.T., Thai,H.D., Nhuyen,H.A.T., Anh,D., Iwasaki,C., Kitamura,N., Van Loock,M., Herrera-Taracena,G., Rasschaert,F., Van Wesenbeeck,L., Yoshida,L.-M., Hafalla,J.C.R., Hue,S., Hibberd,M.L.	2023-02-17 21:00:00	DEN-P-1552-1	Dengue virus	Flavivirus	Flaviviridae	ssRNA(+)	10176	GenBank	partial		Viet Nam: Nha Trang	Viet Nam	Homo sapiens	blood	2019-02-13	Dengue virus type I isolate DEN-P-1552-1 polyprotein (POLY) gene, partial cds
OQ426583	Ashall,J., Shah,S., Biggs,J.R., Chang,R., Jafari,Y., Brady,O.J., Mai,H.K., Lien,L.T., Thai,H.D., Nhuyen,H.A.T., Anh,D., Iwasaki,C., Kitamura,N., Van Loock,M., Herrera-Taracena,G., Rasschaert,F., Van Wesenbeeck,L., Yoshida,L.-M., Hafalla,J.C.R., Hue,S., Hibberd,M.L.	2023-02-17 21:00:00	DEN-P-1550-1	Dengue virus	Flavivirus	Flaviviridae	ssRNA(+)	10176	GenBank	partial		Viet Nam: Nha Trang	Viet Nam	Homo sapiens	blood	2019-02-13	Dengue virus type I isolate DEN-P-1550-1 polyprotein (POLY) gene, partial cds
OQ426582	Ashall,J., Shah,S., Biggs,J.R., Chang,R., Jafari,Y., Brady,O.J., Mai,H.K., Lien,L.T., Thai,H.D., Nhuyen,H.A.T., Anh,D., Iwasaki,C., Kitamura,N., Van Loock,M., Herrera-Taracena,G., Rasschaert,F., Van Wesenbeeck,L., Yoshida,L.-M., Hafalla,J.C.R., Hue,S., Hibberd,M.L.	2023-02-17 21:00:00	DEN-P-1547-1	Dengue virus	Flavivirus	Flaviviridae	ssRNA(+)	10176	GenBank	partial		Viet Nam: Nha Trang	Viet Nam	Homo sapiens	blood	2019-02-12	Dengue virus type I isolate DEN-P-1547-1 polyprotein (POLY) gene, partial cds
OQ426581	Ashall,J., Shah,S., Biggs,J.R., Chang,R., Jafari,Y., Brady,O.J., Mai,H.K., Lien,L.T., Thai,H.D., Nhuyen,H.A.T., Anh,D., Iwasaki,C., Kitamura,N., Van Loock,M., Herrera-Taracena,G., Rasschaert,F., Van Wesenbeeck,L., Yoshida,L.-M., Hafalla,J.C.R., Hue,S., Hibberd,M.L.	2023-02-17 21:00:00	DEN-P-1435-1	Dengue virus	Flavivirus	Flaviviridae	ssRNA(+)	10176	GenBank	partial		Viet Nam: Nha Trang	Viet Nam	Homo sapiens	blood	2019-01-10	Dengue virus type I isolate DEN-P-1435-1 polyprotein (POLY) gene, partial cds
OQ426580	Ashall,J., Shah,S., Biggs,J.R., Chang,R., Jafari,Y., Brady,O.J., Mai,H.K., Lien,L.T., Thai,H.D., Nhuyen,H.A.T., Anh,D., Iwasaki,C., Kitamura,N., Van Loock,M., Herrera-Taracena,G., Rasschaert,F., Van Wesenbeeck,L., Yoshida,L.-M., Hafalla,J.C.R., Hue,S., Hibberd,M.L.	2023-02-17 21:00:00	DEN-P-1427-1	Dengue virus	Flavivirus	Flaviviridae	ssRNA(+)	10176	GenBank	partial		Viet Nam: Nha Trang	Viet Nam	Homo sapiens	blood	2019-01-09	Dengue virus type I isolate DEN-P-1427-1 polyprotein (POLY) gene, partial cds
OQ426579	Ashall,J., Shah,S., Biggs,J.R., Chang,R., Jafari,Y., Brady,O.J., Mai,H.K., Lien,L.T., Thai,H.D., Nhuyen,H.A.T., Anh,D., Iwasaki,C., Kitamura,N., Van Loock,M., Herrera-Taracena,G., Rasschaert,F., Van Wesenbeeck,L., Yoshida,L.-M., Hafalla,J.C.R., Hue,S., Hibberd,M.L.	2023-02-17 21:00:00	DEN-P-1390-1	Dengue virus	Flavivirus	Flaviviridae	ssRNA(+)	10176	GenBank	partial		Viet Nam: Nha Trang	Viet Nam	Homo sapiens	blood	2019-01-03	Dengue virus type I isolate DEN-P-1390-1 polyprotein (POLY) gene, partial cds
OQ426578	Ashall,J., Shah,S., Biggs,J.R., Chang,R., Jafari,Y., Brady,O.J., Mai,H.K., Lien,L.T., Thai,H.D., Nhuyen,H.A.T., Anh,D., Iwasaki,C., Kitamura,N., Van Loock,M., Herrera-Taracena,G., Rasschaert,F., Van Wesenbeeck,L., Yoshida,L.-M., Hafalla,J.C.R., Hue,S., Hibberd,M.L.	2023-02-17 21:00:00	DEN-P-1375-1	Dengue virus	Flavivirus	Flaviviridae	ssRNA(+)	10176	GenBank	partial		Viet Nam: Nha Trang	Viet Nam	Homo sapiens	blood	2018-12-27	Dengue virus type I isolate DEN-P-1375-1 polyprotein (POLY) gene, partial cds
OQ426577	Ashall,J., Shah,S., Biggs,J.R., Chang,R., Jafari,Y., Brady,O.J., Mai,H.K., Lien,L.T., Thai,H.D., Nhuyen,H.A.T., Anh,D., Iwasaki,C., Kitamura,N., Van Loock,M., Herrera-Taracena,G., Rasschaert,F., Van Wesenbeeck,L., Yoshida,L.-M., Hafalla,J.C.R., Hue,S., Hibberd,M.L.	2023-02-17 21:00:00	DEN-P-1360-1	Dengue virus	Flavivirus	Flaviviridae	ssRNA(+)	10176	GenBank	partial		Viet Nam: Nha Trang	Viet Nam	Homo sapiens	blood	2018-12-24	Dengue virus type I isolate DEN-P-1360-1 polyprotein (POLY) gene, partial cds
OQ426576	Ashall,J., Shah,S., Biggs,J.R., Chang,R., Jafari,Y., Brady,O.J., Mai,H.K., Lien,L.T., Thai,H.D., Nhuyen,H.A.T., Anh,D., Iwasaki,C., Kitamura,N., Van Loock,M., Herrera-Taracena,G., Rasschaert,F., Van Wesenbeeck,L., Yoshida,L.-M., Hafalla,J.C.R., Hue,S., Hibberd,M.L.	2023-02-17 21:00:00	DEN-P-1341-1	Dengue virus	Flavivirus	Flaviviridae	ssRNA(+)	10176	GenBank	partial		Viet Nam: Nha Trang	Viet Nam	Homo sapiens	blood	2018-12-21	Dengue virus type I isolate DEN-P-1341-1 polyprotein (POLY) gene, partial cds
OQ426575	Ashall,J., Shah,S., Biggs,J.R., Chang,R., Jafari,Y., Brady,O.J., Mai,H.K., Lien,L.T., Thai,H.D., Nhuyen,H.A.T., Anh,D., Iwasaki,C., Kitamura,N., Van Loock,M., Herrera-Taracena,G., Rasschaert,F., Van Wesenbeeck,L., Yoshida,L.-M., Hafalla,J.C.R., Hue,S., Hibberd,M.L.	2023-02-17 21:00:00	DEN-P-1315-1	Dengue virus	Flavivirus	Flaviviridae	ssRNA(+)	10176	GenBank	partial		Viet Nam: Nha Trang	Viet Nam	Homo sapiens	blood	2018-12-18	Dengue virus type I isolate DEN-P-1315-1 polyprotein (POLY) gene, partial cds
OQ426574	Ashall,J., Shah,S., Biggs,J.R., Chang,R., Jafari,Y., Brady,O.J., Mai,H.K., Lien,L.T., Thai,H.D., Nhuyen,H.A.T., Anh,D., Iwasaki,C., Kitamura,N., Van Loock,M., Herrera-Taracena,G., Rasschaert,F., Van Wesenbeeck,L., Yoshida,L.-M., Hafalla,J.C.R., Hue,S., Hibberd,M.L.	2023-02-17 21:00:00	DEN-P-1252-1	Dengue virus	Flavivirus	Flaviviridae	ssRNA(+)	10176	GenBank	partial		Viet Nam: Nha Trang	Viet Nam	Homo sapiens	blood	2018-12-07	Dengue virus type I isolate DEN-P-1252-1 polyprotein (POLY) gene, partial cds
OQ426573	Ashall,J., Shah,S., Biggs,J.R., Chang,R., Jafari,Y., Brady,O.J., Mai,H.K., Lien,L.T., Thai,H.D., Nhuyen,H.A.T., Anh,D., Iwasaki,C., Kitamura,N., Van Loock,M., Herrera-Taracena,G., Rasschaert,F., Van Wesenbeeck,L., Yoshida,L.-M., Hafalla,J.C.R., Hue,S., Hibberd,M.L.	2023-02-17 21:00:00	DEN-P-1212-1	Dengue virus	Flavivirus	Flaviviridae	ssRNA(+)	10176	GenBank	partial		Viet Nam: Nha Trang	Viet Nam	Homo sapiens	blood	2018-12-03	Dengue virus type I isolate DEN-P-1212-1 polyprotein (POLY) gene, partial cds
OQ426572	Ashall,J., Shah,S., Biggs,J.R., Chang,R., Jafari,Y., Brady,O.J., Mai,H.K., Lien,L.T., Thai,H.D., Nhuyen,H.A.T., Anh,D., Iwasaki,C., Kitamura,N., Van Loock,M., Herrera-Taracena,G., Rasschaert,F., Van Wesenbeeck,L., Yoshida,L.-M., Hafalla,J.C.R., Hue,S., Hibberd,M.L.	2023-02-17 21:00:00	DEN-P-1196-1	Dengue virus	Flavivirus	Flaviviridae	ssRNA(+)	10176	GenBank	partial		Viet Nam: Nha Trang	Viet Nam	Homo sapiens	blood	2018-11-30	Dengue virus type I isolate DEN-P-1196-1 polyprotein (POLY) gene, partial cds
OQ426571	Ashall,J., Shah,S., Biggs,J.R., Chang,R., Jafari,Y., Brady,O.J., Mai,H.K., Lien,L.T., Thai,H.D., Nhuyen,H.A.T., Anh,D., Iwasaki,C., Kitamura,N., Van Loock,M., Herrera-Taracena,G., Rasschaert,F., Van Wesenbeeck,L., Yoshida,L.-M., Hafalla,J.C.R., Hue,S., Hibberd,M.L.	2023-02-17 21:00:00	DEN-P-1174-1	Dengue virus	Flavivirus	Flaviviridae	ssRNA(+)	10176	GenBank	partial		Viet Nam: Nha Trang	Viet Nam	Homo sapiens	blood	2018-11-27	Dengue virus type I isolate DEN-P-1174-1 polyprotein (POLY) gene, partial cds
OQ426570	Ashall,J., Shah,S., Biggs,J.R., Chang,R., Jafari,Y., Brady,O.J., Mai,H.K., Lien,L.T., Thai,H.D., Nhuyen,H.A.T., Anh,D., Iwasaki,C., Kitamura,N., Van Loock,M., Herrera-Taracena,G., Rasschaert,F., Van Wesenbeeck,L., Yoshida,L.-M., Hafalla,J.C.R., Hue,S., Hibberd,M.L.	2023-02-17 21:00:00	DEN-P-1150-1	Dengue virus	Flavivirus	Flaviviridae	ssRNA(+)	10176	GenBank	partial		Viet Nam: Nha Trang	Viet Nam	Homo sapiens	blood	2018-11-22	Dengue virus type I isolate DEN-P-1150-1 polyprotein (POLY) gene, partial cds
OQ426569	Ashall,J., Shah,S., Biggs,J.R., Chang,R., Jafari,Y., Brady,O.J., Mai,H.K., Lien,L.T., Thai,H.D., Nhuyen,H.A.T., Anh,D., Iwasaki,C., Kitamura,N., Van Loock,M., Herrera-Taracena,G., Rasschaert,F., Van Wesenbeeck,L., Yoshida,L.-M., Hafalla,J.C.R., Hue,S., Hibberd,M.L.	2023-02-17 21:00:00	DEN-P-1128-1	Dengue virus	Flavivirus	Flaviviridae	ssRNA(+)	10176	GenBank	partial		Viet Nam: Nha Trang	Viet Nam	Homo sapiens	blood	2018-11-19	Dengue virus type I isolate DEN-P-1128-1 polyprotein (POLY) gene, partial cds
OQ426568	Ashall,J., Shah,S., Biggs,J.R., Chang,R., Jafari,Y., Brady,O.J., Mai,H.K., Lien,L.T., Thai,H.D., Nhuyen,H.A.T., Anh,D., Iwasaki,C., Kitamura,N., Van Loock,M., Herrera-Taracena,G., Rasschaert,F., Van Wesenbeeck,L., Yoshida,L.-M., Hafalla,J.C.R., Hue,S., Hibberd,M.L.	2023-02-17 21:00:00	DEN-P-1126-1	Dengue virus	Flavivirus	Flaviviridae	ssRNA(+)	10176	GenBank	partial		Viet Nam: Nha Trang	Viet Nam	Homo sapiens	blood	2018-11-19	Dengue virus type I isolate DEN-P-1126-1 polyprotein (POLY) gene, partial cds
OQ426567	Ashall,J., Shah,S., Biggs,J.R., Chang,R., Jafari,Y., Brady,O.J., Mai,H.K., Lien,L.T., Thai,H.D., Nhuyen,H.A.T., Anh,D., Iwasaki,C., Kitamura,N., Van Loock,M., Herrera-Taracena,G., Rasschaert,F., Van Wesenbeeck,L., Yoshida,L.-M., Hafalla,J.C.R., Hue,S., Hibberd,M.L.	2023-02-17 21:00:00	DEN-P-1110-1	Dengue virus	Flavivirus	Flaviviridae	ssRNA(+)	10176	GenBank	partial		Viet Nam: Nha Trang	Viet Nam	Homo sapiens	blood	2018-11-15	Dengue virus type I isolate DEN-P-1110-1 polyprotein (POLY) gene, partial cds
OQ426566	Ashall,J., Shah,S., Biggs,J.R., Chang,R., Jafari,Y., Brady,O.J., Mai,H.K., Lien,L.T., Thai,H.D., Nhuyen,H.A.T., Anh,D., Iwasaki,C., Kitamura,N., Van Loock,M., Herrera-Taracena,G., Rasschaert,F., Van Wesenbeeck,L., Yoshida,L.-M., Hafalla,J.C.R., Hue,S., Hibberd,M.L.	2023-02-17 21:00:00	DEN-P-1098-1	Dengue virus	Flavivirus	Flaviviridae	ssRNA(+)	10176	GenBank	partial		Viet Nam: Nha Trang	Viet Nam	Homo sapiens	blood	2018-11-14	Dengue virus type I isolate DEN-P-1098-1 polyprotein (POLY) gene, partial cds
OQ339085	Kumar,P., Shashi,P., Singh,B., Verma,C.K., Tripathi,A., Chandele,A., Lodha,R., Medigeshi,G.R.	2023-01-31 21:00:00	THSTI-TRC-DENV1-20	Dengue virus	Flavivirus	Flaviviridae	ssRNA(+)	10709	GenBank	partial		India	India	Homo sapiens	blood	2021-01-01	Dengue virus type I isolate THSTI-TRC-DENV1-20 polyprotein (POLY) gene, complete cds; and sfRNA1 lncRNA gene, partial sequence
OQ339084	Kumar,P., Shashi,P., Singh,B., Verma,C.K., Tripathi,A., Chandele,A., Lodha,R., Medigeshi,G.R.	2023-01-31 21:00:00	THSTI-TRC-DENV1-19	Dengue virus	Flavivirus	Flaviviridae	ssRNA(+)	10702	GenBank	partial		India	India	Homo sapiens	blood	2021-01-01	Dengue virus type I isolate THSTI-TRC-DENV1-19 polyprotein (POLY) gene, complete cds; and sfRNA1 lncRNA gene, partial sequence
OQ339083	Kumar,P., Shashi,P., Singh,B., Verma,C.K., Tripathi,A., Chandele,A., Lodha,R., Medigeshi,G.R.	2023-01-31 21:00:00	THSTI-TRC-DENV1-18	Dengue virus	Flavivirus	Flaviviridae	ssRNA(+)	10711	GenBank	partial		India	India	Homo sapiens	blood	2021-01-01	Dengue virus type I isolate THSTI-TRC-DENV1-18 polyprotein (POLY) gene, complete cds; and sfRNA1 lncRNA gene, partial sequence
OQ080034	Dassanayake,A.K.K., De Silva,A.D., Abeygoonawardena,H., Kariyawasam,J.C., Chathuranga,T., Sundralingam,T., Dilshani,P., Gunasekara,H., Premawansa,G., Premawansa,S., Weiskopf,D., Sette,A., Punchihewa,C.	2023-01-24 21:00:00	GS2386	Dengue virus	Flavivirus	Flaviviridae	ssRNA(+)	10721	GenBank	partial	1	Sri Lanka	Sri Lanka	Homo sapiens	blood	2020-08-17	Dengue virus type I isolate GS2386 polyprotein (POLY) gene, complete cds; and sfRNA1 lncRNA gene, partial sequence
OQ061315	Dassanayake,A.K.K., De Silva,A.D., Kariyawasam,J.C., De Silva,A., Fernando,A.N., Tippalagama,R., Rajendran,A.	2022-12-20 21:00:00	L69	Dengue virus	Flavivirus	Flaviviridae	ssRNA(+)	10594	GenBank	partial	1	Sri Lanka	Sri Lanka	Homo sapiens		1997-01-01	Dengue virus type I isolate L69 polyprotein (POLY) gene, complete cds; and sfRNA1 lncRNA gene, partial sequence
OQ061266	Dassanayake,A.K.K., De Silva,A.D., Kariyawasam,J.C., De Silva,A., Fernando,A.N., Tippalagama,R., Rajendran,A.	2022-12-20 21:00:00	D1298 (1585)	Dengue virus	Flavivirus	Flaviviridae	ssRNA(+)	10614	GenBank	partial	1	Sri Lanka	Sri Lanka	Homo sapiens		1983-01-01	Dengue virus type I isolate D1298 (1585) polyprotein (POLY) gene, complete cds; and sfRNA1 lncRNA gene, partial sequence
OP984871	Su,W., Cao,Y., Lu,W.	2022-12-16 21:00:00	2022GZ08325_D1_MMR	Dengue virus	Flavivirus	Flaviviridae	ssRNA(+)	10680	GenBank	partial		Myanmar	Myanmar	Homo sapiens	blood	2022-08-12	Dengue virus type I isolate 2022GZ08325_D1_MMR polyprotein (POLY) gene, complete cds; and sfRNA1 lncRNA gene, partial sequence
OP898558	Umair,M., Rehman,Z., Haider,S.A., Salman,M., Ikram,A.	2022-12-02 21:00:00	NIH-PAK-11/2022	Dengue virus	Flavivirus	Flaviviridae	ssRNA(+)	10510	GenBank	partial		Pakistan	Pakistan	Homo sapiens	blood	2022-10-01	Dengue virus type I isolate NIH-PAK-11/2022 polyprotein (POLY) gene, partial cds; and sfRNA1 lncRNA gene, partial sequence
OP898557	Umair,M., Rehman,Z., Haider,S.A., Salman,M., Ikram,A.	2022-12-02 21:00:00	NIH-PAK-08/2022	Dengue virus	Flavivirus	Flaviviridae	ssRNA(+)	10510	GenBank	partial		Pakistan	Pakistan	Homo sapiens	blood	2022-04-01	Dengue virus type I isolate NIH-PAK-08/2022 polyprotein (POLY) gene, complete cds; and sfRNA1 lncRNA gene, partial sequence
OP895916	Nagy,O., Takacs,M., Nagy,A.	2022-11-30 21:00:00	DENV_5739_2017	Dengue virus	Flavivirus	Flaviviridae	ssRNA(+)	10689	GenBank	partial	DENV-1 Genotype I	Borneo	Borneo	Homo sapiens	blood	2017-10-01	Dengue virus type I isolate DENV_5739_2017 polyprotein (POLY) gene, complete cds; and sfRNA1 lncRNA gene, partial sequence
OP895915	Nagy,O., Takacs,M., Nagy,A.	2022-11-30 21:00:00	DENV_1266_2019	Dengue virus	Flavivirus	Flaviviridae	ssRNA(+)	10687	GenBank	partial	DENV-1 Genotype I	Thailand	Thailand	Homo sapiens	blood	2019-03-01	Dengue virus type I isolate DENV_1266_2019 polyprotein (POLY) gene, complete cds; and sfRNA1 lncRNA gene, partial sequence
OP895914	Nagy,O., Takacs,M., Nagy,A.	2022-11-30 21:00:00	DENV_686_2017	Dengue virus	Flavivirus	Flaviviridae	ssRNA(+)	10689	GenBank	partial	DENV-1 Genotype I	Thailand	Thailand	Homo sapiens	blood	2017-02-01	Dengue virus type I isolate DENV_686_2017 polyprotein (POLY) gene, complete cds; and sfRNA1 lncRNA gene, partial sequence
OP895913	Nagy,O., Takacs,M., Nagy,A.	2022-11-30 21:00:00	DENV_102_2017	Dengue virus	Flavivirus	Flaviviridae	ssRNA(+)	10656	GenBank	partial	DENV-1 Genotype IV	Malaysia	Malaysia	Homo sapiens	blood	2017-01-01	Dengue virus type I isolate DENV_102_2017 polyprotein (POLY) gene, complete cds; and sfRNA1 lncRNA gene, partial sequence
OP895912	Nagy,O., Takacs,M., Nagy,A.	2022-11-30 21:00:00	DENV_48_2021	Dengue virus	Flavivirus	Flaviviridae	ssRNA(+)	10669	GenBank	partial	DENV-1 Genotype V	Saint Martin	Saint Martin	Homo sapiens	blood	2021-01-01	Dengue virus type I isolate DENV_48_2021 polyprotein (POLY) gene, complete cds; and sfRNA1 lncRNA gene, partial sequence
OP895911	Nagy,O., Takacs,M., Nagy,A.	2022-11-30 21:00:00	DENV_34_2021	Dengue virus	Flavivirus	Flaviviridae	ssRNA(+)	10675	GenBank	partial	DENV-1 Genotype V	Saint Martin	Saint Martin	Homo sapiens	blood	2021-01-01	Dengue virus type I isolate DENV_34_2021 polyprotein (POLY) gene, complete cds; and sfRNA1 lncRNA gene, partial sequence
OP809580	Agrawal,T., Saraswat,S., Shashi,P., Ananthraj,A., Kumar,S., Chandele,A., Lodha,R., Singh,B., Medigeshi,G.R.	2022-11-15 21:00:00	THSTI-TRC-DENV1-17	Dengue virus	Flavivirus	Flaviviridae	ssRNA(+)	10599	GenBank	partial		India	India	Homo sapiens	blood	2021-01-01	Dengue virus type I isolate THSTI-TRC-DENV1-17 polyprotein (POLY) gene, complete cds; and sfRNA1 lncRNA gene, partial sequence
OP410988	Hapuarachchi,H.C., Setoh,Y.X., Wong,J.C.C., Ng,L.C.	2022-09-14 21:00:00	SG(EHI)D1/19261Y19	Dengue virus	Flavivirus	Flaviviridae	ssRNA(+)	10735	GenBank	partial	Genotype I	Singapore	Singapore	Homo sapiens	blood	2019-05-01	Dengue virus type I isolate SG(EHI)D1/19261Y19 polyprotein (POLY) gene, complete cds; and sfRNA1 lncRNA gene, complete sequence
OP410987	Hapuarachchi,H.C., Setoh,Y.X., Wong,J.C.C., Ng,L.C.	2022-09-14 21:00:00	SG(EHI)D1/45748Y13	Dengue virus	Flavivirus	Flaviviridae	ssRNA(+)	10714	GenBank	partial	Genotype V	Singapore	Singapore	Homo sapiens	blood	2013-11-01	Dengue virus type I isolate SG(EHI)D1/45748Y13 polyprotein (POLY) gene, complete cds; and sfRNA1 lncRNA gene, complete sequence
OP410986	Hapuarachchi,H.C., Setoh,Y.X., Wong,J.C.C., Ng,L.C.	2022-09-14 21:00:00	SG(EHI)D1/05372Y16	Dengue virus	Flavivirus	Flaviviridae	ssRNA(+)	10735	GenBank	partial	Genotype I	Singapore	Singapore	Homo sapiens	blood	2016-02-01	Dengue virus type I isolate SG(EHI)D1/05372Y16 polyprotein (POLY) gene, complete cds; and sfRNA1 lncRNA gene, complete sequence
OP410985	Hapuarachchi,H.C., Setoh,Y.X., Wong,J.C.C., Ng,L.C.	2022-09-14 21:00:00	SG(EHI)D1/48084MAR10	Dengue virus	Flavivirus	Flaviviridae	ssRNA(+)	10735	GenBank	partial	Genotype I	Singapore	Singapore	Homo sapiens	blood	2010-03-01	Dengue virus type I isolate SG(EHI)D1/48084MAR10 polyprotein (POLY) gene, complete cds; and sfRNA1 lncRNA gene, complete sequence
OP315654	Hu,M., Wu,T., Yang,Y., Chen,T., Hao,J., Wei,Y., Luo,T., Wu, Li,Y.P., Li,Y.	2022-09-29 21:00:00	D19044_7M	Dengue virus	Flavivirus	Flaviviridae	ssRNA(+)	10735	GenBank	partial		China	China	Homo sapiens		2019-09-04	Dengue virus type I isolate D19044_7M polyprotein (POLY) gene, complete cds; and sfRNA1 lncRNA gene, complete sequence
OP315653	Hu,M., Wu,T., Yang,Y., Chen,T., Hao,J., Wei,Y., Luo,T., Wu, Li,Y.P., Li,Y.	2022-09-29 21:00:00	D19044	Dengue virus	Flavivirus	Flaviviridae	ssRNA(+)	10464	GenBank	partial		China	China	Homo sapiens	blood	2019-09-04	Dengue virus type I isolate D19044 polyprotein (POLY) gene, complete cds; and sfRNA1 lncRNA gene, partial sequence
OP310804	Agrawal,T., Saraswat,S., Shashi,P., Ananthraj,A., Kumar,S., Chandele,A., Lodha,R., Singh,B., Medigeshi,G.R.	2022-08-30 21:00:00	THSTI-TRC-DENV1-16	Dengue virus	Flavivirus	Flaviviridae	ssRNA(+)	10721	GenBank	partial		India	India	Homo sapiens	blood	2018-01-01	Dengue virus type I isolate THSTI-TRC-DENV1-16 polyprotein (POLY) gene, complete cds; and sfRNA1 lncRNA gene, partial sequence
OP310803	Agrawal,T., Saraswat,S., Shashi,P., Ananthraj,A., Kumar,S., Chandele,A., Lodha,R., Singh,B., Medigeshi,G.R.	2022-08-30 21:00:00	THSTI-TRC-DENV1-08	Dengue virus	Flavivirus	Flaviviridae	ssRNA(+)	10731	GenBank	partial		India	India	Homo sapiens	blood	2019-01-01	Dengue virus type I isolate THSTI-TRC-DENV1-08 polyprotein (POLY) gene, complete cds; and sfRNA1 lncRNA gene, partial sequence
ON911333	Su,W., Jiang,L., Lu,W., Cao,Y.	2022-07-09 21:00:00	19XN14467_D1	Dengue virus	Flavivirus	Flaviviridae	ssRNA(+)	10449	GenBank	partial		Cambodia	Cambodia	Homo sapiens	blood	2019-06-13	Dengue virus 1 isolate 19XN14467_D1 polyprotein (POLY) gene, complete cds; and sfRNA1 lncRNA gene, partial sequence
ON908243	Su,W., Jiang,L., Lu,W., Cao,Y.	2022-07-06 21:00:00	D1_19XN26758	Dengue virus	Flavivirus	Flaviviridae	ssRNA(+)	10622	GenBank	partial		China	China	Homo sapiens	blood	2019-10-25	Dengue virus 1 isolate D1_19XN26758 polyprotein (POLY) gene, complete cds; and sfRNA1 lncRNA gene, partial sequence
ON908220	Su,W., Jiang,L., Lu,W., Cao,Y.	2022-07-06 21:00:00	19XN26154_D1	Dengue virus	Flavivirus	Flaviviridae	ssRNA(+)	10578	GenBank	partial		India	India	Homo sapiens	blood	2019-10-18	Dengue virus 1 isolate 19XN26154_D1 polyprotein (POLY) gene, complete cds; and sfRNA1 lncRNA gene, partial sequence
ON908219	Su,W., Jiang,L., Lu,W., Cao,Y.	2022-07-06 21:00:00	19XN14467_D1	Dengue virus	Flavivirus	Flaviviridae	ssRNA(+)	10577	GenBank	partial		Cambodia	Cambodia	Homo sapiens	blood	2019-06-13	Dengue virus 1 isolate 19XN14467_D1 polyprotein (POLY) gene, complete cds; and sfRNA1 lncRNA gene, partial sequence
ON908218	Su,W., Jiang,L., Lu,W., Cao,Y.	2022-07-06 21:00:00	19XN12211_D1	Dengue virus	Flavivirus	Flaviviridae	ssRNA(+)	10481	GenBank	partial		Cambodia	Cambodia	Homo sapiens	blood	2019-05-24	Dengue virus 1 isolate 19XN12211_D1 polyprotein (POLY) gene, complete cds; and sfRNA1 lncRNA gene, partial sequence
ON908217	Su,W., Jiang,L., Lu,W., Cao,Y.	2022-07-06 21:00:00	19XN50687_D1	Dengue virus	Flavivirus	Flaviviridae	ssRNA(+)	10570	GenBank	partial		Pakistan	Pakistan	Homo sapiens	blood	2019-08-09	Dengue virus 1 isolate 19XN50687_D1 polyprotein (POLY) gene, complete cds; and sfRNA1 lncRNA gene, partial sequence
ON908216	Su,W., Jiang,L., Lu,W., Cao,Y.	2022-07-06 21:00:00	19XN21528_D1	Dengue virus	Flavivirus	Flaviviridae	ssRNA(+)	10486	GenBank	partial		Philippines	Philippines	Homo sapiens	blood	2019-08-26	Dengue virus 1 isolate 19XN21528_D1 polyprotein (POLY) gene, complete cds; and sfRNA1 lncRNA gene, partial sequence
ON908215	Su,W., Jiang,L., Lu,W., Cao,Y.	2022-07-06 21:00:00	19XN24151_D1	Dengue virus	Flavivirus	Flaviviridae	ssRNA(+)	10601	GenBank	partial		China	China	Homo sapiens	blood	2019-09-18	Dengue virus 1 isolate 19XN24151_D1 polyprotein (POLY) gene, complete cds; and sfRNA1 lncRNA gene, partial sequence
ON908214	Su,W., Jiang,L., Lu,W., Cao,Y.	2022-07-06 21:00:00	19XN28258_D1	Dengue virus	Flavivirus	Flaviviridae	ssRNA(+)	10582	GenBank	partial		Myanmar	Myanmar	Homo sapiens	blood	2019-11-16	Dengue virus 1 isolate 19XN28258_D1 polyprotein (POLY) gene, complete cds; and sfRNA1 lncRNA gene, partial sequence
ON908213	Su,W., Jiang,L., Lu,W., Cao,Y.	2022-07-06 21:00:00	19XN14843_D1	Dengue virus	Flavivirus	Flaviviridae	ssRNA(+)	10493	GenBank	partial		China	China	Homo sapiens	blood	2019-06-21	Dengue virus 1 isolate 19XN14843_D1 polyprotein (POLY) gene, complete cds; and sfRNA1 lncRNA gene, partial sequence
ON908212	Su,W., Jiang,L., Lu,W., Cao,Y.	2022-07-06 21:00:00	19XN14812_D1	Dengue virus	Flavivirus	Flaviviridae	ssRNA(+)	10493	GenBank	partial		China	China	Homo sapiens	blood	2019-06-18	Dengue virus 1 isolate 19XN14812_D1 polyprotein (POLY) gene, complete cds; and sfRNA1 lncRNA gene, partial sequence
ON907578	Su,W., Cao,Y., Lu,W.	2022-07-06 21:00:00	19XN24151_D1_CHN	Dengue virus	Flavivirus	Flaviviridae	ssRNA(+)	10660	GenBank	partial		China	China	Homo sapiens	blood	2019-09-18	Dengue virus 1 isolate 19XN24151_D1_CHN polyprotein (POLY) gene, complete cds; and sfRNA1 lncRNA gene, partial sequence
ON907577	Su,W., Cao,Y., Lu,W.	2022-07-06 21:00:00	19XN14467_D1_KHM	Dengue virus	Flavivirus	Flaviviridae	ssRNA(+)	10426	GenBank	partial		Cambodia	Cambodia	Homo sapiens	blood	2019-06-13	Dengue virus 1 isolate 19XN14467_D1_KHM polyprotein (POLY) gene, complete cds; and sfRNA1 lncRNA gene, partial sequence
ON891144	Su,W., Cao,Y., Lu,W.	2022-07-04 21:00:00	19XN26758_D1_CHN	Dengue virus	Flavivirus	Flaviviridae	ssRNA(+)	10646	GenBank	partial		China: Guangzhou	China	Homo sapiens	blood	2019-10-25	Dengue virus 1 isolate 19XN26758_D1_CHN polyprotein (POLY) gene, complete cds; and sfRNA1 lncRNA gene, partial sequence
ON881244	Su,W., Cao,Y., Lu,W.	2022-07-04 21:00:00	19XN24151_D1_CHN	Dengue virus	Flavivirus	Flaviviridae	ssRNA(+)	10660	GenBank	partial		China: Guangzhou	China	Homo sapiens	blood	2019-09-18	Dengue virus 1 isolate 19XN24151_D1_CHN polyprotein (POLY) gene, complete cds; and sfRNA1 lncRNA gene, partial sequence
ON881145	Su,W., Cao,Y., Lu,W.	2022-07-04 21:00:00	19XN28258_D1_MMR	Dengue virus	Flavivirus	Flaviviridae	ssRNA(+)	10624	GenBank	partial		Myanmar	Myanmar	Homo sapiens	blood	2019-11-16	Dengue virus 1 isolate 19XN28258_D1_MMR polyprotein (POLY) gene, complete cds; and sfRNA1 lncRNA gene, partial sequence
ON873938	Su,W., Cao,Y., Lu,W.	2022-07-03 21:00:00	19XN50687_D1_PAK	Dengue virus	Flavivirus	Flaviviridae	ssRNA(+)	10477	GenBank	partial		Pakistan	Pakistan	Homo sapiens	blood	2019-08-09	Dengue virus 1 isolate 19XN50687_D1_PAK polyprotein (POLY) gene, complete cds; and sfRNA1 lncRNA gene, partial sequence
ON873885	Su,W., Cao,Y., Lu,W.	2022-07-03 21:00:00	19XN14843_D1_CHN	Dengue virus	Flavivirus	Flaviviridae	ssRNA(+)	10175	GenBank	partial		China: Guangzhou	China	Homo sapiens	blood	2019-06-21	Dengue virus 1 isolate 19XN14843_D1_CHN polyprotein (POLY) gene, partial cds
ON868498	Su,W., Cao,Y., Lu,W.	2022-07-02 21:00:00	19XN14467_D1_KHM	Dengue virus	Flavivirus	Flaviviridae	ssRNA(+)	10426	GenBank	partial		China: Guangzhou	China	Homo sapiens	blood	2019-06-13	Dengue virus 1 isolate 19XN14467_D1_KHM polyprotein (POLY) gene, complete cds; and sfRNA1 lncRNA gene, partial sequence
ON867003	Su,W., Cao,Y., Lu,W.	2022-07-02 21:00:00	19XN12211_D1_KHM	Dengue virus	Flavivirus	Flaviviridae	ssRNA(+)	10636	GenBank	partial		Cambodia	Cambodia	Homo sapiens	blood	2019-05-24	Dengue virus 1 isolate 19XN12211_D1_KHM polyprotein (POLY) gene, complete cds; and sfRNA1 lncRNA gene, partial sequence
ON845601	Su,W., Cao,Y., Lu,W.	2022-06-30 21:00:00	21XN16257	Dengue virus	Flavivirus	Flaviviridae	ssRNA(+)	10685	GenBank	partial		Viet Nam	Viet Nam	Homo sapiens	blood	2021-08-31	Dengue virus 1 isolate 21XN16257 polyprotein (POLY) gene, complete cds; and sfRNA1 lncRNA gene, partial sequence
ON680908	Abeygoonawardena,H., De Silva,A.D., Wijesinghe,N., Navaratne,V., Dilshani,P., Sundralingam,T., Punchihewa,C.	2022-06-11 21:00:00	F-082	Dengue virus	Flavivirus	Flaviviridae	ssRNA(+)	10728	GenBank	partial		Sri Lanka	Sri Lanka	Homo sapiens	blood	2020-08-24	Dengue virus 1 isolate F-082 polyprotein (POLY) gene, complete cds; and sfRNA1 lncRNA gene, partial sequence
ON632124	Sacchi,C.T., Campos,K.R., Santos,M.B., Reis,A.D., Amarante,A.F.	2022-08-22 21:00:00	RP28	Dengue virus	Flavivirus	Flaviviridae	ssRNA(+)	10329	GenBank	partial	V	Brazil: Sao Paulo, Matao	Brazil	Homo sapiens	blood	2022-04-12	Dengue virus 1 isolate RP28 polyprotein (POLY) gene, complete cds; and sfRNA1 lncRNA gene, partial sequence
ON632123	Sacchi,C.T., Campos,K.R., Santos,M.B., Reis,A.D., Amarante,A.F.	2022-08-22 21:00:00	RP25	Dengue virus	Flavivirus	Flaviviridae	ssRNA(+)	10348	GenBank	partial	V	Brazil: Sao Paulo, Descalvado	Brazil	Homo sapiens	blood	2022-03-10	Dengue virus 1 isolate RP25 polyprotein (POLY) gene, complete cds; and sfRNA1 lncRNA gene, partial sequence
ON632122	Sacchi,C.T., Campos,K.R., Santos,M.B., Reis,A.D., Amarante,A.F.	2022-08-22 21:00:00	RP22	Dengue virus	Flavivirus	Flaviviridae	ssRNA(+)	10225	GenBank	partial	V	Brazil: Sao Paulo, Olimpia	Brazil	Homo sapiens	blood	2022-03-17	Dengue virus 1 isolate RP22 polyprotein (POLY) gene, complete cds
ON632121	Sacchi,C.T., Campos,K.R., Santos,M.B., Reis,A.D., Amarante,A.F.	2022-08-22 21:00:00	RP21	Dengue virus	Flavivirus	Flaviviridae	ssRNA(+)	10353	GenBank	partial	V	Brazil: Sao Paulo, Araraquara	Brazil	Homo sapiens	blood	2022-03-17	Dengue virus 1 isolate RP21 polyprotein (POLY) gene, complete cds; and sfRNA1 lncRNA gene, partial sequence
ON632120	Sacchi,C.T., Campos,K.R., Santos,M.B., Reis,A.D., Amarante,A.F.	2022-08-22 21:00:00	RNA48742	Dengue virus	Flavivirus	Flaviviridae	ssRNA(+)	10529	GenBank	partial	V	Brazil: Sao Paulo, Coroados	Brazil	Homo sapiens	blood	2022-03-15	Dengue virus 1 isolate RNA48742 polyprotein (POLY) gene, complete cds; and sfRNA1 lncRNA gene, partial sequence
ON632119	Sacchi,C.T., Campos,K.R., Santos,M.B., Reis,A.D., Amarante,A.F.	2022-08-22 21:00:00	RNA48699	Dengue virus	Flavivirus	Flaviviridae	ssRNA(+)	10441	GenBank	partial	V	Brazil: Sao Paulo, Americana	Brazil	Homo sapiens	blood	2022-03-07	Dengue virus 1 isolate RNA48699 polyprotein (POLY) gene, complete cds; and sfRNA1 lncRNA gene, partial sequence
ON632118	Sacchi,C.T., Campos,K.R., Santos,M.B., Reis,A.D., Amarante,A.F.	2022-08-22 21:00:00	NS11667	Dengue virus	Flavivirus	Flaviviridae	ssRNA(+)	10179	GenBank	partial	V	Brazil: Sao Paulo, Francisco Morato	Brazil	Homo sapiens	blood	2022-04-14	Dengue virus 1 isolate NS11667 polyprotein (POLY) gene, complete cds
ON632117	Sacchi,C.T., Campos,K.R., Santos,M.B., Reis,A.D., Amarante,A.F.	2022-08-22 21:00:00	NS11666	Dengue virus	Flavivirus	Flaviviridae	ssRNA(+)	10316	GenBank	partial	V	Brazil: Sao Paulo, Ferraz de Vasconcelos	Brazil	Homo sapiens	blood	2022-04-18	Dengue virus 1 isolate NS11666 polyprotein (POLY) gene, complete cds; and sfRNA1 lncRNA gene, partial sequence
ON632116	Sacchi,C.T., Campos,K.R., Santos,M.B., Reis,A.D., Amarante,A.F.	2022-08-22 21:00:00	NS11664	Dengue virus	Flavivirus	Flaviviridae	ssRNA(+)	10179	GenBank	partial	V	Brazil: Sao Paulo, Sao Paulo	Brazil	Homo sapiens	blood	2022-04-24	Dengue virus 1 isolate NS11664 polyprotein (POLY) gene, complete cds
ON632115	Sacchi,C.T., Campos,K.R., Santos,M.B., Reis,A.D., Amarante,A.F.	2022-08-22 21:00:00	NS11662	Dengue virus	Flavivirus	Flaviviridae	ssRNA(+)	10252	GenBank	partial	V	Brazil: Sao Paulo, Taruma	Brazil	Homo sapiens	blood	2022-04-12	Dengue virus 1 isolate NS11662 polyprotein (POLY) gene, complete cds
ON632114	Sacchi,C.T., Campos,K.R., Santos,M.B., Reis,A.D., Amarante,A.F.	2022-08-22 21:00:00	NS11643	Dengue virus	Flavivirus	Flaviviridae	ssRNA(+)	10179	GenBank	partial	V	Brazil: Sao Paulo, Taubate	Brazil	Homo sapiens	blood	2022-04-11	Dengue virus 1 isolate NS11643 polyprotein (POLY) gene, complete cds
ON632113	Sacchi,C.T., Campos,K.R., Santos,M.B., Reis,A.D., Amarante,A.F.	2022-08-22 21:00:00	NS11639	Dengue virus	Flavivirus	Flaviviridae	ssRNA(+)	10420	GenBank	partial	V	Brazil: Sao Paulo, Taubate	Brazil	Homo sapiens	blood	2022-04-11	Dengue virus 1 isolate NS11639 polyprotein (POLY) gene, complete cds; and sfRNA1 lncRNA gene, partial sequence
ON632112	Sacchi,C.T., Campos,K.R., Santos,M.B., Reis,A.D., Amarante,A.F.	2022-08-22 21:00:00	NS11637	Dengue virus	Flavivirus	Flaviviridae	ssRNA(+)	10422	GenBank	partial	V	Brazil: Sao Paulo, Sao Jose dos Campos	Brazil	Homo sapiens	blood	2022-04-02	Dengue virus 1 isolate NS11637 polyprotein (POLY) gene, complete cds; and sfRNA1 lncRNA gene, partial sequence
ON632111	Sacchi,C.T., Campos,K.R., Santos,M.B., Reis,A.D., Amarante,A.F.	2022-08-22 21:00:00	NS11630	Dengue virus	Flavivirus	Flaviviridae	ssRNA(+)	10446	GenBank	partial	V	Brazil: Sao Paulo, Taubate	Brazil	Homo sapiens	blood	2022-04-06	Dengue virus 1 isolate NS11630 polyprotein (POLY) gene, complete cds; and sfRNA1 lncRNA gene, partial sequence
ON632110	Sacchi,C.T., Campos,K.R., Santos,M.B., Reis,A.D., Amarante,A.F.	2022-08-22 21:00:00	NS11617	Dengue virus	Flavivirus	Flaviviridae	ssRNA(+)	10378	GenBank	partial	V	Brazil: Sao Paulo, Ilhabela	Brazil	Homo sapiens	blood	2022-04-01	Dengue virus 1 isolate NS11617 polyprotein (POLY) gene, complete cds; and sfRNA1 lncRNA gene, partial sequence
ON632109	Sacchi,C.T., Campos,K.R., Santos,M.B., Reis,A.D., Amarante,A.F.	2022-08-22 21:00:00	NS11606	Dengue virus	Flavivirus	Flaviviridae	ssRNA(+)	10350	GenBank	partial	V	Brazil: Sao Paulo, Rosana	Brazil	Homo sapiens	blood	2022-04-19	Dengue virus 1 isolate NS11606 polyprotein (POLY) gene, complete cds; and sfRNA1 lncRNA gene, partial sequence
ON632108	Sacchi,C.T., Campos,K.R., Santos,M.B., Reis,A.D., Amarante,A.F.	2022-08-22 21:00:00	NS11601	Dengue virus	Flavivirus	Flaviviridae	ssRNA(+)	10441	GenBank	partial	V	Brazil: Sao Paulo, Rosana	Brazil	Homo sapiens	blood	2022-04-19	Dengue virus 1 isolate NS11601 polyprotein (POLY) gene, complete cds; and sfRNA1 lncRNA gene, partial sequence
ON632107	Sacchi,C.T., Campos,K.R., Santos,M.B., Reis,A.D., Amarante,A.F.	2022-08-22 21:00:00	NS11591	Dengue virus	Flavivirus	Flaviviridae	ssRNA(+)	10368	GenBank	partial	V	Brazil: Sao Paulo, Taubate	Brazil	Homo sapiens	blood	2022-04-09	Dengue virus 1 isolate NS11591 polyprotein (POLY) gene, complete cds; and sfRNA1 lncRNA gene, partial sequence
ON632106	Sacchi,C.T., Campos,K.R., Santos,M.B., Reis,A.D., Amarante,A.F.	2022-08-22 21:00:00	NS11575	Dengue virus	Flavivirus	Flaviviridae	ssRNA(+)	10381	GenBank	partial	V	Brazil: Sao Paulo, Nova Odessa	Brazil	Homo sapiens	blood	2022-04-04	Dengue virus 1 isolate NS11575 polyprotein (POLY) gene, complete cds; and sfRNA1 lncRNA gene, partial sequence
ON632105	Sacchi,C.T., Campos,K.R., Santos,M.B., Reis,A.D., Amarante,A.F.	2022-08-22 21:00:00	NS11571	Dengue virus	Flavivirus	Flaviviridae	ssRNA(+)	10179	GenBank	partial	V	Brazil: Sao Paulo, Sao Jose dos Campos	Brazil	Homo sapiens	blood	2022-04-02	Dengue virus 1 isolate NS11571 polyprotein (POLY) gene, complete cds
ON632104	Sacchi,C.T., Campos,K.R., Santos,M.B., Reis,A.D., Amarante,A.F.	2022-08-22 21:00:00	NS11566	Dengue virus	Flavivirus	Flaviviridae	ssRNA(+)	10269	GenBank	partial	V	Brazil: Sao Paulo, Taubate	Brazil	Homo sapiens	blood	2022-04-04	Dengue virus 1 isolate NS11566 polyprotein (POLY) gene, complete cds; and sfRNA1 lncRNA gene, partial sequence
ON632103	Sacchi,C.T., Campos,K.R., Santos,M.B., Reis,A.D., Amarante,A.F.	2022-08-22 21:00:00	NS11561	Dengue virus	Flavivirus	Flaviviridae	ssRNA(+)	10450	GenBank	partial	V	Brazil: Sao Paulo, Sao Jose dos Campos	Brazil	Homo sapiens	blood	2022-04-01	Dengue virus 1 isolate NS11561 polyprotein (POLY) gene, complete cds; and sfRNA1 lncRNA gene, partial sequence
ON632102	Sacchi,C.T., Campos,K.R., Santos,M.B., Reis,A.D., Amarante,A.F.	2022-08-22 21:00:00	NS11559	Dengue virus	Flavivirus	Flaviviridae	ssRNA(+)	10179	GenBank	partial	V	Brazil: Sao Paulo, Taubate	Brazil	Homo sapiens	blood	2022-04-11	Dengue virus 1 isolate NS11559 polyprotein (POLY) gene, complete cds
ON632101	Sacchi,C.T., Campos,K.R., Santos,M.B., Reis,A.D., Amarante,A.F.	2022-08-22 21:00:00	NS11558	Dengue virus	Flavivirus	Flaviviridae	ssRNA(+)	10363	GenBank	partial	V	Brazil: Sao Paulo, Taubate	Brazil	Homo sapiens	blood	2022-04-04	Dengue virus 1 isolate NS11558 polyprotein (POLY) gene, complete cds; and sfRNA1 lncRNA gene, partial sequence
ON632100	Sacchi,C.T., Campos,K.R., Santos,M.B., Reis,A.D., Amarante,A.F.	2022-08-22 21:00:00	NS11550	Dengue virus	Flavivirus	Flaviviridae	ssRNA(+)	10387	GenBank	partial	V	Brazil: Sao Paulo, Taubate	Brazil	Homo sapiens	blood	2022-04-05	Dengue virus 1 isolate NS11550 polyprotein (POLY) gene, complete cds; and sfRNA1 lncRNA gene, partial sequence
ON632099	Sacchi,C.T., Campos,K.R., Santos,M.B., Reis,A.D., Amarante,A.F.	2022-08-22 21:00:00	NS11548	Dengue virus	Flavivirus	Flaviviridae	ssRNA(+)	10438	GenBank	partial	V	Brazil: Sao Paulo, Taubate	Brazil	Homo sapiens	blood	2022-04-07	Dengue virus 1 isolate NS11548 polyprotein (POLY) gene, complete cds; and sfRNA1 lncRNA gene, partial sequence
ON632098	Sacchi,C.T., Campos,K.R., Santos,M.B., Reis,A.D., Amarante,A.F.	2022-08-22 21:00:00	NS11536	Dengue virus	Flavivirus	Flaviviridae	ssRNA(+)	10425	GenBank	partial	V	Brazil: Sao Paulo, Itu	Brazil	Homo sapiens	blood	2022-04-12	Dengue virus 1 isolate NS11536 polyprotein (POLY) gene, complete cds; and sfRNA1 lncRNA gene, partial sequence
ON632097	Sacchi,C.T., Campos,K.R., Santos,M.B., Reis,A.D., Amarante,A.F.	2022-08-22 21:00:00	NS11535	Dengue virus	Flavivirus	Flaviviridae	ssRNA(+)	10433	GenBank	partial	V	Brazil: Sao Paulo, Nova Odessa	Brazil	Homo sapiens	blood	2022-04-10	Dengue virus 1 isolate NS11535 polyprotein (POLY) gene, complete cds; and sfRNA1 lncRNA gene, partial sequence
ON632096	Sacchi,C.T., Campos,K.R., Santos,M.B., Reis,A.D., Amarante,A.F.	2022-08-22 21:00:00	NS11533	Dengue virus	Flavivirus	Flaviviridae	ssRNA(+)	10439	GenBank	partial	V	Brazil: Sao Paulo, Duartina	Brazil	Homo sapiens	blood	2022-04-01	Dengue virus 1 isolate NS11533 polyprotein (POLY) gene, complete cds; and sfRNA1 lncRNA gene, partial sequence
ON632095	Sacchi,C.T., Campos,K.R., Santos,M.B., Reis,A.D., Amarante,A.F.	2022-08-22 21:00:00	NS11526	Dengue virus	Flavivirus	Flaviviridae	ssRNA(+)	10340	GenBank	partial	V	Brazil: Sao Paulo, Gabriel Monteiro	Brazil	Homo sapiens	blood	2022-03-30	Dengue virus 1 isolate NS11526 polyprotein (POLY) gene, complete cds; and sfRNA1 lncRNA gene, partial sequence
ON632094	Sacchi,C.T., Campos,K.R., Santos,M.B., Reis,A.D., Amarante,A.F.	2022-08-22 21:00:00	NS11492	Dengue virus	Flavivirus	Flaviviridae	ssRNA(+)	10263	GenBank	partial	V	Brazil: Sao Paulo, Taubate	Brazil	Homo sapiens	blood	2022-04-04	Dengue virus 1 isolate NS11492 polyprotein (POLY) gene, complete cds; and sfRNA1 lncRNA gene, partial sequence
ON632093	Sacchi,C.T., Campos,K.R., Santos,M.B., Reis,A.D., Amarante,A.F.	2022-08-22 21:00:00	NS11468	Dengue virus	Flavivirus	Flaviviridae	ssRNA(+)	10179	GenBank	partial	V	Brazil: Sao Paulo, Itu	Brazil	Homo sapiens	blood	2022-04-03	Dengue virus 1 isolate NS11468 polyprotein (POLY) gene, complete cds
ON632092	Sacchi,C.T., Campos,K.R., Santos,M.B., Reis,A.D., Amarante,A.F.	2022-08-22 21:00:00	NS11454	Dengue virus	Flavivirus	Flaviviridae	ssRNA(+)	10344	GenBank	partial	V	Brazil: Sao Paulo, Bauru	Brazil	Homo sapiens	blood	2022-03-26	Dengue virus 1 isolate NS11454 polyprotein (POLY) gene, complete cds; and sfRNA1 lncRNA gene, partial sequence
ON632091	Sacchi,C.T., Campos,K.R., Santos,M.B., Reis,A.D., Amarante,A.F.	2022-08-22 21:00:00	NS11439	Dengue virus	Flavivirus	Flaviviridae	ssRNA(+)	10182	GenBank	partial	V	Brazil: Sao Paulo, Duartina	Brazil	Homo sapiens	blood	2022-03-30	Dengue virus 1 isolate NS11439 polyprotein (POLY) gene, complete cds
ON632090	Sacchi,C.T., Campos,K.R., Santos,M.B., Reis,A.D., Amarante,A.F.	2022-08-22 21:00:00	NS11424	Dengue virus	Flavivirus	Flaviviridae	ssRNA(+)	10422	GenBank	partial	V	Brazil: Sao Paulo, Sao Jose dos Campos	Brazil	Homo sapiens	blood	2022-03-25	Dengue virus 1 isolate NS11424 polyprotein (POLY) gene, complete cds; and sfRNA1 lncRNA gene, partial sequence
ON632089	Sacchi,C.T., Campos,K.R., Santos,M.B., Reis,A.D., Amarante,A.F.	2022-08-22 21:00:00	NS11416	Dengue virus	Flavivirus	Flaviviridae	ssRNA(+)	10342	GenBank	partial	V	Brazil: Sao Paulo, Taubate	Brazil	Homo sapiens	blood	2022-03-17	Dengue virus 1 isolate NS11416 polyprotein (POLY) gene, complete cds; and sfRNA1 lncRNA gene, partial sequence
ON632088	Sacchi,C.T., Campos,K.R., Santos,M.B., Reis,A.D., Amarante,A.F.	2022-08-22 21:00:00	NS11361	Dengue virus	Flavivirus	Flaviviridae	ssRNA(+)	10418	GenBank	partial	V	Brazil: Sao Paulo, Guarulhos	Brazil	Homo sapiens	blood	2022-03-19	Dengue virus 1 isolate NS11361 polyprotein (POLY) gene, complete cds; and sfRNA1 lncRNA gene, partial sequence
ON632087	Sacchi,C.T., Campos,K.R., Santos,M.B., Reis,A.D., Amarante,A.F.	2022-08-22 21:00:00	NS11352	Dengue virus	Flavivirus	Flaviviridae	ssRNA(+)	10290	GenBank	partial	V	Brazil: Sao Paulo, Bauru	Brazil	Homo sapiens	blood	2022-03-18	Dengue virus 1 isolate NS11352 polyprotein (POLY) gene, complete cds; and sfRNA1 lncRNA gene, partial sequence
ON632086	Sacchi,C.T., Campos,K.R., Santos,M.B., Reis,A.D., Amarante,A.F.	2022-08-22 21:00:00	NS11347	Dengue virus	Flavivirus	Flaviviridae	ssRNA(+)	10347	GenBank	partial	V	Brazil: Sao Paulo, Sao Jose dos Campos	Brazil	Homo sapiens	blood	2022-03-25	Dengue virus 1 isolate NS11347 polyprotein (POLY) gene, complete cds; and sfRNA1 lncRNA gene, partial sequence
ON632085	Sacchi,C.T., Campos,K.R., Santos,M.B., Reis,A.D., Amarante,A.F.	2022-08-22 21:00:00	NS11344	Dengue virus	Flavivirus	Flaviviridae	ssRNA(+)	10182	GenBank	partial	V	Brazil: Sao Paulo, Tremembe	Brazil	Homo sapiens	blood	2022-03-17	Dengue virus 1 isolate NS11344 polyprotein (POLY) gene, complete cds
ON632084	Sacchi,C.T., Campos,K.R., Santos,M.B., Reis,A.D., Amarante,A.F.	2022-08-22 21:00:00	NS11341	Dengue virus	Flavivirus	Flaviviridae	ssRNA(+)	10427	GenBank	partial	V	Brazil: Sao Paulo, Taubate	Brazil	Homo sapiens	blood	2022-03-14	Dengue virus 1 isolate NS11341 polyprotein (POLY) gene, complete cds; and sfRNA1 lncRNA gene, partial sequence
ON632083	Sacchi,C.T., Campos,K.R., Santos,M.B., Reis,A.D., Amarante,A.F.	2022-08-22 21:00:00	NS11336	Dengue virus	Flavivirus	Flaviviridae	ssRNA(+)	10436	GenBank	partial	V	Brazil: Sao Paulo, Taubate	Brazil	Homo sapiens	blood	2022-03-16	Dengue virus 1 isolate NS11336 polyprotein (POLY) gene, complete cds; and sfRNA1 lncRNA gene, partial sequence
ON632082	Sacchi,C.T., Campos,K.R., Santos,M.B., Reis,A.D., Amarante,A.F.	2022-08-22 21:00:00	NS11283	Dengue virus	Flavivirus	Flaviviridae	ssRNA(+)	10353	GenBank	partial	V	Brazil: Sao Paulo, Ourinhos	Brazil	Homo sapiens	blood	2022-03-11	Dengue virus 1 isolate NS11283 polyprotein (POLY) gene, complete cds; and sfRNA1 lncRNA gene, partial sequence
ON632081	Sacchi,C.T., Campos,K.R., Santos,M.B., Reis,A.D., Amarante,A.F.	2022-08-22 21:00:00	NS10976	Dengue virus	Flavivirus	Flaviviridae	ssRNA(+)	10179	GenBank	partial	V	Brazil: Sao Paulo, Campinas	Brazil	Homo sapiens	blood	2022-02-24	Dengue virus 1 isolate NS10976 polyprotein (POLY) gene, complete cds
ON632080	Sacchi,C.T., Campos,K.R., Santos,M.B., Reis,A.D., Amarante,A.F.	2022-08-22 21:00:00	49808	Dengue virus	Flavivirus	Flaviviridae	ssRNA(+)	10520	GenBank	partial	V	Brazil: Sao Paulo, Murutinga do Sul	Brazil	Homo sapiens	blood	2022-04-12	Dengue virus 1 isolate 49808 polyprotein (POLY) gene, complete cds; and sfRNA1 lncRNA gene, partial sequence
ON632079	Sacchi,C.T., Campos,K.R., Santos,M.B., Reis,A.D., Amarante,A.F.	2022-08-22 21:00:00	49443	Dengue virus	Flavivirus	Flaviviridae	ssRNA(+)	10218	GenBank	partial	V	Brazil: Sao Paulo, Santa Barbara D Oeste	Brazil	Homo sapiens	blood	2022-04-19	Dengue virus 1 isolate 49443 polyprotein (POLY) gene, complete cds
ON632078	Sacchi,C.T., Campos,K.R., Santos,M.B., Reis,A.D., Amarante,A.F.	2022-08-22 21:00:00	49430	Dengue virus	Flavivirus	Flaviviridae	ssRNA(+)	10269	GenBank	partial	V	Brazil: Sao Paulo, Bady Bassitt	Brazil	Homo sapiens	blood	2022-04-18	Dengue virus 1 isolate 49430 polyprotein (POLY) gene, complete cds; and sfRNA1 lncRNA gene, partial sequence
ON632077	Sacchi,C.T., Campos,K.R., Santos,M.B., Reis,A.D., Amarante,A.F.	2022-08-22 21:00:00	49369	Dengue virus	Flavivirus	Flaviviridae	ssRNA(+)	10431	GenBank	partial	V	Brazil: Sao Paulo, Itaquaquecetuba	Brazil	Homo sapiens	blood	2022-04-19	Dengue virus 1 isolate 49369 polyprotein (POLY) gene, complete cds; and sfRNA1 lncRNA gene, partial sequence
ON632076	Sacchi,C.T., Campos,K.R., Santos,M.B., Reis,A.D., Amarante,A.F.	2022-08-22 21:00:00	49367	Dengue virus	Flavivirus	Flaviviridae	ssRNA(+)	10243	GenBank	partial	V	Brazil: Sao Paulo, Mairipora	Brazil	Homo sapiens	blood	2022-04-13	Dengue virus 1 isolate 49367 polyprotein (POLY) gene, complete cds; and sfRNA1 lncRNA gene, partial sequence
ON632075	Sacchi,C.T., Campos,K.R., Santos,M.B., Reis,A.D., Amarante,A.F.	2022-08-22 21:00:00	49365	Dengue virus	Flavivirus	Flaviviridae	ssRNA(+)	10329	GenBank	partial	V	Brazil: Sao Paulo, Mairipora	Brazil	Homo sapiens	blood	2022-04-21	Dengue virus 1 isolate 49365 polyprotein (POLY) gene, complete cds; and sfRNA1 lncRNA gene, partial sequence
ON632074	Sacchi,C.T., Campos,K.R., Santos,M.B., Reis,A.D., Amarante,A.F.	2022-08-22 21:00:00	49325	Dengue virus	Flavivirus	Flaviviridae	ssRNA(+)	10347	GenBank	partial	V	Brazil: Sao Paulo, Santa Barbara D Oeste	Brazil	Homo sapiens	blood	2022-04-18	Dengue virus 1 isolate 49325 polyprotein (POLY) gene, complete cds; and sfRNA1 lncRNA gene, partial sequence
ON632073	Sacchi,C.T., Campos,K.R., Santos,M.B., Reis,A.D., Amarante,A.F.	2022-08-22 21:00:00	49298	Dengue virus	Flavivirus	Flaviviridae	ssRNA(+)	10429	GenBank	partial	V	Brazil: Sao Paulo, Murutinga do Sul	Brazil	Homo sapiens	blood	2022-04-12	Dengue virus 1 isolate 49298 polyprotein (POLY) gene, complete cds; and sfRNA1 lncRNA gene, partial sequence
ON632072	Sacchi,C.T., Campos,K.R., Santos,M.B., Reis,A.D., Amarante,A.F.	2022-08-22 21:00:00	49286	Dengue virus	Flavivirus	Flaviviridae	ssRNA(+)	10493	GenBank	partial	V	Brazil: Sao Paulo, Itajobi	Brazil	Homo sapiens	blood	2022-04-12	Dengue virus 1 isolate 49286 polyprotein (POLY) gene, complete cds; and sfRNA1 lncRNA gene, partial sequence
ON632071	Sacchi,C.T., Campos,K.R., Santos,M.B., Reis,A.D., Amarante,A.F.	2022-08-22 21:00:00	49255	Dengue virus	Flavivirus	Flaviviridae	ssRNA(+)	10418	GenBank	partial	V	Brazil: Sao Paulo, Garca	Brazil	Homo sapiens	blood	2022-04-11	Dengue virus 1 isolate 49255 polyprotein (POLY) gene, complete cds; and sfRNA1 lncRNA gene, partial sequence
ON632070	Sacchi,C.T., Campos,K.R., Santos,M.B., Reis,A.D., Amarante,A.F.	2022-08-22 21:00:00	49223	Dengue virus	Flavivirus	Flaviviridae	ssRNA(+)	10179	GenBank	partial	V	Brazil: Sao Paulo, Carapicuiba	Brazil	Homo sapiens	blood	2022-04-11	Dengue virus 1 isolate 49223 polyprotein (POLY) gene, complete cds
ON632069	Sacchi,C.T., Campos,K.R., Santos,M.B., Reis,A.D., Amarante,A.F.	2022-08-22 21:00:00	49219	Dengue virus	Flavivirus	Flaviviridae	ssRNA(+)	10418	GenBank	partial	V	Brazil: Sao Paulo, Itaquaquecetuba	Brazil	Homo sapiens	blood	2022-04-08	Dengue virus 1 isolate 49219 polyprotein (POLY) gene, complete cds; and sfRNA1 lncRNA gene, partial sequence
ON632068	Sacchi,C.T., Campos,K.R., Santos,M.B., Reis,A.D., Amarante,A.F.	2022-08-22 21:00:00	49211	Dengue virus	Flavivirus	Flaviviridae	ssRNA(+)	10218	GenBank	partial	V	Brazil: Sao Paulo, Osasco	Brazil	Homo sapiens	blood	2022-04-13	Dengue virus 1 isolate 49211 polyprotein (POLY) gene, complete cds
ON632067	Sacchi,C.T., Campos,K.R., Santos,M.B., Reis,A.D., Amarante,A.F.	2022-08-22 21:00:00	49207	Dengue virus	Flavivirus	Flaviviridae	ssRNA(+)	10433	GenBank	partial	V	Brazil: Sao Paulo, Americana	Brazil	Homo sapiens	blood	2022-04-09	Dengue virus 1 isolate 49207 polyprotein (POLY) gene, complete cds; and sfRNA1 lncRNA gene, partial sequence
ON632066	Sacchi,C.T., Campos,K.R., Santos,M.B., Reis,A.D., Amarante,A.F.	2022-08-22 21:00:00	49203	Dengue virus	Flavivirus	Flaviviridae	ssRNA(+)	10331	GenBank	partial	V	Brazil: Sao Paulo, Campinas	Brazil	Homo sapiens	blood	2022-04-13	Dengue virus 1 isolate 49203 polyprotein (POLY) gene, complete cds; and sfRNA1 lncRNA gene, partial sequence
ON632065	Sacchi,C.T., Campos,K.R., Santos,M.B., Reis,A.D., Amarante,A.F.	2022-08-22 21:00:00	49198	Dengue virus	Flavivirus	Flaviviridae	ssRNA(+)	10261	GenBank	partial	V	Brazil: Sao Paulo, Campinas	Brazil	Homo sapiens	blood	2022-04-08	Dengue virus 1 isolate 49198 polyprotein (POLY) gene, complete cds
ON632064	Sacchi,C.T., Campos,K.R., Santos,M.B., Reis,A.D., Amarante,A.F.	2022-08-22 21:00:00	49175	Dengue virus	Flavivirus	Flaviviridae	ssRNA(+)	10334	GenBank	partial	V	Brazil: Sao Paulo, Ubarana	Brazil	Homo sapiens	blood	2022-04-09	Dengue virus 1 isolate 49175 polyprotein (POLY) gene, complete cds; and sfRNA1 lncRNA gene, partial sequence
ON632063	Sacchi,C.T., Campos,K.R., Santos,M.B., Reis,A.D., Amarante,A.F.	2022-08-22 21:00:00	49167	Dengue virus	Flavivirus	Flaviviridae	ssRNA(+)	10433	GenBank	partial	V	Brazil: Sao Paulo, Americana	Brazil	Homo sapiens	blood	2022-04-11	Dengue virus 1 isolate 49167 polyprotein (POLY) gene, complete cds; and sfRNA1 lncRNA gene, partial sequence
ON632062	Sacchi,C.T., Campos,K.R., Santos,M.B., Reis,A.D., Amarante,A.F.	2022-08-22 21:00:00	49161	Dengue virus	Flavivirus	Flaviviridae	ssRNA(+)	10179	GenBank	partial	V	Brazil: Sao Paulo, Americana	Brazil	Homo sapiens	blood	2022-03-31	Dengue virus 1 isolate 49161 polyprotein (POLY) gene, complete cds
ON632061	Sacchi,C.T., Campos,K.R., Santos,M.B., Reis,A.D., Amarante,A.F.	2022-08-22 21:00:00	49153	Dengue virus	Flavivirus	Flaviviridae	ssRNA(+)	10225	GenBank	partial	V	Brazil: Sao Paulo, Monte Alto	Brazil	Homo sapiens	blood	2022-04-06	Dengue virus 1 isolate 49153 polyprotein (POLY) gene, complete cds
ON632060	Sacchi,C.T., Campos,K.R., Santos,M.B., Reis,A.D., Amarante,A.F.	2022-08-22 21:00:00	49110	Dengue virus	Flavivirus	Flaviviridae	ssRNA(+)	10452	GenBank	partial	V	Brazil: Sao Paulo, Ourinhos	Brazil	Homo sapiens	blood	2022-03-28	Dengue virus 1 isolate 49110 polyprotein (POLY) gene, complete cds; and sfRNA1 lncRNA gene, partial sequence
ON632059	Sacchi,C.T., Campos,K.R., Santos,M.B., Reis,A.D., Amarante,A.F.	2022-08-22 21:00:00	49103	Dengue virus	Flavivirus	Flaviviridae	ssRNA(+)	10344	GenBank	partial	V	Brazil: Sao Paulo, Garca	Brazil	Homo sapiens	blood	2022-03-30	Dengue virus 1 isolate 49103 polyprotein (POLY) gene, complete cds; and sfRNA1 lncRNA gene, partial sequence
ON632058	Sacchi,C.T., Campos,K.R., Santos,M.B., Reis,A.D., Amarante,A.F.	2022-08-22 21:00:00	49070	Dengue virus	Flavivirus	Flaviviridae	ssRNA(+)	10382	GenBank	partial	V	Brazil: Sao Paulo, Itu	Brazil	Homo sapiens	blood	2022-04-04	Dengue virus 1 isolate 49070 polyprotein (POLY) gene, complete cds; and sfRNA1 lncRNA gene, partial sequence
ON632057	Sacchi,C.T., Campos,K.R., Santos,M.B., Reis,A.D., Amarante,A.F.	2022-08-22 21:00:00	49069	Dengue virus	Flavivirus	Flaviviridae	ssRNA(+)	10179	GenBank	partial	V	Brazil: Sao Paulo, Itapeva	Brazil	Homo sapiens	blood	2022-04-04	Dengue virus 1 isolate 49069 polyprotein (POLY) gene, complete cds
ON632056	Sacchi,C.T., Campos,K.R., Santos,M.B., Reis,A.D., Amarante,A.F.	2022-08-22 21:00:00	49058	Dengue virus	Flavivirus	Flaviviridae	ssRNA(+)	10436	GenBank	partial	V	Brazil: Sao Paulo, Itanhaem	Brazil	Homo sapiens	blood	2022-03-26	Dengue virus 1 isolate 49058 polyprotein (POLY) gene, complete cds; and sfRNA1 lncRNA gene, partial sequence
ON632055	Sacchi,C.T., Campos,K.R., Santos,M.B., Reis,A.D., Amarante,A.F.	2022-08-22 21:00:00	49054	Dengue virus	Flavivirus	Flaviviridae	ssRNA(+)	10187	GenBank	partial	V	Brazil: Sao Paulo, Balsamo	Brazil	Homo sapiens	blood	2022-03-29	Dengue virus 1 isolate 49054 polyprotein (POLY) gene, complete cds
ON632054	Sacchi,C.T., Campos,K.R., Santos,M.B., Reis,A.D., Amarante,A.F.	2022-08-22 21:00:00	49046	Dengue virus	Flavivirus	Flaviviridae	ssRNA(+)	10270	GenBank	partial	V	Brazil: Sao Paulo, Imbituba	Brazil	Homo sapiens	blood	2022-04-05	Dengue virus 1 isolate 49046 polyprotein (POLY) gene, complete cds
ON632053	Sacchi,C.T., Campos,K.R., Santos,M.B., Reis,A.D., Amarante,A.F.	2022-08-22 21:00:00	49025	Dengue virus	Flavivirus	Flaviviridae	ssRNA(+)	10179	GenBank	partial	V	Brazil: Sao Paulo, Nova Granada	Brazil	Homo sapiens	blood	2022-04-04	Dengue virus 1 isolate 49025 polyprotein (POLY) gene, complete cds
ON632052	Sacchi,C.T., Campos,K.R., Santos,M.B., Reis,A.D., Amarante,A.F.	2022-08-22 21:00:00	49024	Dengue virus	Flavivirus	Flaviviridae	ssRNA(+)	10427	GenBank	partial	V	Brazil: Sao Paulo, Itapeva	Brazil	Homo sapiens	blood	2022-04-04	Dengue virus 1 isolate 49024 polyprotein (POLY) gene, complete cds; and sfRNA1 lncRNA gene, partial sequence
ON632051	Sacchi,C.T., Campos,K.R., Santos,M.B., Reis,A.D., Amarante,A.F.	2022-08-22 21:00:00	49021	Dengue virus	Flavivirus	Flaviviridae	ssRNA(+)	10436	GenBank	partial	V	Brazil: Sao Paulo, Mogi Mirin	Brazil	Homo sapiens	blood	2022-04-05	Dengue virus 1 isolate 49021 polyprotein (POLY) gene, complete cds; and sfRNA1 lncRNA gene, partial sequence
ON632050	Sacchi,C.T., Campos,K.R., Santos,M.B., Reis,A.D., Amarante,A.F.	2022-08-22 21:00:00	49012	Dengue virus	Flavivirus	Flaviviridae	ssRNA(+)	10402	GenBank	partial	V	Brazil: Sao Paulo, Sao Jose do Rio Preto	Brazil	Homo sapiens	blood	2022-03-26	Dengue virus 1 isolate 49012 polyprotein (POLY) gene, complete cds; and sfRNA1 lncRNA gene, partial sequence
ON632049	Sacchi,C.T., Campos,K.R., Santos,M.B., Reis,A.D., Amarante,A.F.	2022-08-22 21:00:00	49001	Dengue virus	Flavivirus	Flaviviridae	ssRNA(+)	10431	GenBank	partial	V	Brazil: Sao Paulo, Campinas	Brazil	Homo sapiens	blood	2022-03-27	Dengue virus 1 isolate 49001 polyprotein (POLY) gene, complete cds; and sfRNA1 lncRNA gene, partial sequence
ON632048	Sacchi,C.T., Campos,K.R., Santos,M.B., Reis,A.D., Amarante,A.F.	2022-08-22 21:00:00	48999	Dengue virus	Flavivirus	Flaviviridae	ssRNA(+)	10350	GenBank	partial	V	Brazil: Sao Paulo, Paulinia	Brazil	Homo sapiens	blood	2022-04-03	Dengue virus 1 isolate 48999 polyprotein (POLY) gene, complete cds; and sfRNA1 lncRNA gene, partial sequence
ON632047	Sacchi,C.T., Campos,K.R., Santos,M.B., Reis,A.D., Amarante,A.F.	2022-08-22 21:00:00	48994	Dengue virus	Flavivirus	Flaviviridae	ssRNA(+)	10423	GenBank	partial	V	Brazil: Sao Paulo, Garca	Brazil	Homo sapiens	blood	2022-03-22	Dengue virus 1 isolate 48994 polyprotein (POLY) gene, complete cds; and sfRNA1 lncRNA gene, partial sequence
ON632046	Sacchi,C.T., Campos,K.R., Santos,M.B., Reis,A.D., Amarante,A.F.	2022-08-22 21:00:00	48972	Dengue virus	Flavivirus	Flaviviridae	ssRNA(+)	10350	GenBank	partial	V	Brazil: Sao Paulo, Guarulhos	Brazil	Homo sapiens	blood	2022-04-01	Dengue virus 1 isolate 48972 polyprotein (POLY) gene, complete cds; and sfRNA1 lncRNA gene, partial sequence
ON632045	Sacchi,C.T., Campos,K.R., Santos,M.B., Reis,A.D., Amarante,A.F.	2022-08-22 21:00:00	48945	Dengue virus	Flavivirus	Flaviviridae	ssRNA(+)	10187	GenBank	partial	V	Brazil: Sao Paulo, Santa Barbara D Oeste	Brazil	Homo sapiens	blood	2022-03-28	Dengue virus 1 isolate 48945 polyprotein (POLY) gene, complete cds
ON632044	Sacchi,C.T., Campos,K.R., Santos,M.B., Reis,A.D., Amarante,A.F.	2022-08-22 21:00:00	48937	Dengue virus	Flavivirus	Flaviviridae	ssRNA(+)	10360	GenBank	partial	V	Brazil: Sao Paulo, Itu	Brazil	Homo sapiens	blood	2022-03-29	Dengue virus 1 isolate 48937 polyprotein (POLY) gene, complete cds; and sfRNA1 lncRNA gene, partial sequence
ON632043	Sacchi,C.T., Campos,K.R., Santos,M.B., Reis,A.D., Amarante,A.F.	2022-08-22 21:00:00	48904	Dengue virus	Flavivirus	Flaviviridae	ssRNA(+)	10356	GenBank	partial	V	Brazil: Sao Paulo, Aracatuba	Brazil	Homo sapiens	blood	2022-03-26	Dengue virus 1 isolate 48904 polyprotein (POLY) gene, complete cds; and sfRNA1 lncRNA gene, partial sequence
ON632042	Sacchi,C.T., Campos,K.R., Santos,M.B., Reis,A.D., Amarante,A.F.	2022-08-22 21:00:00	48846	Dengue virus	Flavivirus	Flaviviridae	ssRNA(+)	10398	GenBank	partial	V	Brazil: Sao Paulo, Catanduva	Brazil	Homo sapiens	blood	2022-03-25	Dengue virus 1 isolate 48846 polyprotein (POLY) gene, complete cds; and sfRNA1 lncRNA gene, partial sequence
ON632041	Sacchi,C.T., Campos,K.R., Santos,M.B., Reis,A.D., Amarante,A.F.	2022-08-22 21:00:00	48840	Dengue virus	Flavivirus	Flaviviridae	ssRNA(+)	10451	GenBank	partial	V	Brazil: Sao Paulo, Zacarias	Brazil	Homo sapiens	blood	2022-03-17	Dengue virus 1 isolate 48840 polyprotein (POLY) gene, complete cds; and sfRNA1 lncRNA gene, partial sequence
ON632040	Sacchi,C.T., Campos,K.R., Santos,M.B., Reis,A.D., Amarante,A.F.	2022-08-22 21:00:00	210001000000	Dengue virus	Flavivirus	Flaviviridae	ssRNA(+)	10179	GenBank	partial	V	Brazil: Amazonas, Manaus	Brazil	Homo sapiens	blood	2022-04-12	Dengue virus 1 isolate 210001024774 polyprotein (POLY) gene, complete cds
ON631283	Hafsia,S., Barbar,T., Wilkinson,D.A., Atyame,C., Biscornet,L., Bibi,J., Louange,M., Gedeon,J., De Santis,O., Flahault,A., Cabie,A., Bertolotti,A., Mavingui,P.	2022-11-27 21:00:00	PR4443	Dengue virus	Flavivirus	Flaviviridae	ssRNA(+)	10688	GenBank	partial	DENV1	Reunion	Reunion	Homo sapiens	blood	2020-01-01	Dengue virus type I isolate PR4443 polyprotein (POLY) gene, complete cds; and sfRNA1 lncRNA gene, partial sequence
ON631282	Hafsia,S., Barbar,T., Wilkinson,D.A., Atyame,C., Biscornet,L., Bibi,J., Louange,M., Gedeon,J., De Santis,O., Flahault,A., Cabie,A., Bertolotti,A., Mavingui,P.	2022-11-27 21:00:00	PR4453	Dengue virus	Flavivirus	Flaviviridae	ssRNA(+)	10678	GenBank	partial	DENV1	Reunion	Reunion	Homo sapiens	blood	2020-01-01	Dengue virus type I isolate PR4453 polyprotein (POLY) gene, complete cds; and sfRNA1 lncRNA gene, partial sequence
ON631281	Hafsia,S., Barbar,T., Wilkinson,D.A., Atyame,C., Biscornet,L., Bibi,J., Louange,M., Gedeon,J., De Santis,O., Flahault,A., Cabie,A., Bertolotti,A., Mavingui,P.	2022-11-27 21:00:00	PR4463	Dengue virus	Flavivirus	Flaviviridae	ssRNA(+)	10668	GenBank	partial	DENV1	Reunion	Reunion	Homo sapiens	blood	2020-01-01	Dengue virus type I isolate PR4463 polyprotein (POLY) gene, complete cds; and sfRNA1 lncRNA gene, partial sequence
ON631280	Hafsia,S., Barbar,T., Wilkinson,D.A., Atyame,C., Biscornet,L., Bibi,J., Louange,M., Gedeon,J., De Santis,O., Flahault,A., Cabie,A., Bertolotti,A., Mavingui,P.	2022-11-27 21:00:00	PR4483	Dengue virus	Flavivirus	Flaviviridae	ssRNA(+)	10690	GenBank	partial	DENV1	Reunion	Reunion	Homo sapiens	blood	2020-01-01	Dengue virus type I isolate PR4483 polyprotein (POLY) gene, complete cds; and sfRNA1 lncRNA gene, partial sequence
ON631279	Hafsia,S., Barbar,T., Wilkinson,D.A., Atyame,C., Biscornet,L., Bibi,J., Louange,M., Gedeon,J., De Santis,O., Flahault,A., Cabie,A., Bertolotti,A., Mavingui,P.	2022-11-27 21:00:00	RUN1-6594	Dengue virus	Flavivirus	Flaviviridae	ssRNA(+)	10708	GenBank	partial	DENV1	Reunion	Reunion	Homo sapiens		2021-01-01	Dengue virus type I isolate RUN1-6594 polyprotein (POLY) gene, complete cds; and sfRNA1 lncRNA gene, partial sequence
ON631278	Hafsia,S., Barbar,T., Wilkinson,D.A., Atyame,C., Biscornet,L., Bibi,J., Louange,M., Gedeon,J., De Santis,O., Flahault,A., Cabie,A., Bertolotti,A., Mavingui,P.	2022-11-27 21:00:00	PR6594	Dengue virus	Flavivirus	Flaviviridae	ssRNA(+)	10693	GenBank	partial	DENV1	Reunion	Reunion	Homo sapiens	blood	2021-01-01	Dengue virus type I isolate PR6594 polyprotein (POLY) gene, complete cds; and sfRNA1 lncRNA gene, partial sequence
ON631277	Hafsia,S., Barbar,T., Wilkinson,D.A., Atyame,C., Biscornet,L., Bibi,J., Louange,M., Gedeon,J., De Santis,O., Flahault,A., Cabie,A., Bertolotti,A., Mavingui,P.	2022-11-27 21:00:00	PR1583	Dengue virus	Flavivirus	Flaviviridae	ssRNA(+)	10516	GenBank	partial	DENV1	Reunion	Reunion	Homo sapiens	blood	2019-04-01	Dengue virus type I isolate PR1583 polyprotein (POLY) gene, complete cds; and sfRNA1 lncRNA gene, partial sequence
ON631276	Hafsia,S., Barbar,T., Wilkinson,D.A., Atyame,C., Biscornet,L., Bibi,J., Louange,M., Gedeon,J., De Santis,O., Flahault,A., Cabie,A., Bertolotti,A., Mavingui,P.	2022-11-27 21:00:00	PO409	Dengue virus	Flavivirus	Flaviviridae	ssRNA(+)	10549	GenBank	partial	DENV1	Reunion	Reunion	Homo sapiens	blood	2020-02-01	Dengue virus type I isolate PO409 polyprotein (POLY) gene, complete cds; and sfRNA1 lncRNA gene, partial sequence
ON631275	Hafsia,S., Barbar,T., Wilkinson,D.A., Atyame,C., Biscornet,L., Bibi,J., Louange,M., Gedeon,J., De Santis,O., Flahault,A., Cabie,A., Bertolotti,A., Mavingui,P.	2022-11-27 21:00:00	PR1615	Dengue virus	Flavivirus	Flaviviridae	ssRNA(+)	10004	GenBank	partial	DENV1	Reunion	Reunion	Homo sapiens	blood	2019-04-01	Dengue virus type I isolate PR1615 polyprotein (POLY) gene, partial cds
ON631274	Hafsia,S., Barbar,T., Wilkinson,D.A., Atyame,C., Biscornet,L., Bibi,J., Louange,M., Gedeon,J., De Santis,O., Flahault,A., Cabie,A., Bertolotti,A., Mavingui,P.	2022-11-27 21:00:00	PR1914	Dengue virus	Flavivirus	Flaviviridae	ssRNA(+)	10004	GenBank	partial	DENV1	Reunion	Reunion	Homo sapiens	blood	2019-04-01	Dengue virus type I isolate PR1914 polyprotein (POLY) gene, partial cds
ON426359	Sacchi,C.T., Campos,K.R., Santos,M.B., Reis,A.D., Nogueira,J.S., Maeda,A.Y.	2022-08-22 21:00:00	RP14	Dengue virus	Flavivirus	Flaviviridae	ssRNA(+)	10421	GenBank	partial	V	Brazil: Sao Paulo, Ribeirao Preto	Brazil	Homo sapiens	blood	2021-04-20	Dengue virus 1 isolate RP14 polyprotein (POLY) gene, complete cds; and sfRNA1 lncRNA gene, partial sequence
ON426358	Sacchi,C.T., Campos,K.R., Santos,M.B., Reis,A.D., Nogueira,J.S., Maeda,A.Y.	2022-08-22 21:00:00	RP13	Dengue virus	Flavivirus	Flaviviridae	ssRNA(+)	10421	GenBank	partial	V	Brazil: Sao Paulo, Ribeirao Preto	Brazil	Homo sapiens	blood	2021-04-05	Dengue virus 1 isolate RP13 polyprotein (POLY) gene, complete cds; and sfRNA1 lncRNA gene, partial sequence
ON426357	Sacchi,C.T., Campos,K.R., Santos,M.B., Reis,A.D., Nogueira,J.S., Maeda,A.Y.	2022-08-22 21:00:00	RP12	Dengue virus	Flavivirus	Flaviviridae	ssRNA(+)	10421	GenBank	partial	V	Brazil: Sao Paulo, Ribeirao Preto	Brazil	Homo sapiens	blood	2021-04-20	Dengue virus 1 isolate RP12 polyprotein (POLY) gene, complete cds; and sfRNA1 lncRNA gene, partial sequence
ON426356	Sacchi,C.T., Campos,K.R., Santos,M.B., Reis,A.D., Nogueira,J.S., Maeda,A.Y.	2022-08-22 21:00:00	RP11	Dengue virus	Flavivirus	Flaviviridae	ssRNA(+)	10421	GenBank	partial	V	Brazil: Sao Paulo, Ribeirao Preto	Brazil	Homo sapiens	blood	2021-04-07	Dengue virus 1 isolate RP11 polyprotein (POLY) gene, complete cds; and sfRNA1 lncRNA gene, partial sequence
ON426355	Sacchi,C.T., Campos,K.R., Santos,M.B., Reis,A.D., Nogueira,J.S., Maeda,A.Y.	2022-08-22 21:00:00	RP10	Dengue virus	Flavivirus	Flaviviridae	ssRNA(+)	10421	GenBank	partial	V	Brazil: Sao Paulo, Ribeirao Preto	Brazil	Homo sapiens	blood	2021-04-13	Dengue virus 1 isolate RP10 polyprotein (POLY) gene, complete cds; and sfRNA1 lncRNA gene, partial sequence
ON426354	Sacchi,C.T., Campos,K.R., Santos,M.B., Reis,A.D., Nogueira,J.S., Maeda,A.Y.	2022-08-22 21:00:00	RP09	Dengue virus	Flavivirus	Flaviviridae	ssRNA(+)	10421	GenBank	partial	V	Brazil: Sao Paulo, Ribeirao Preto	Brazil	Homo sapiens	blood	2021-04-07	Dengue virus 1 isolate RP09 polyprotein (POLY) gene, complete cds; and sfRNA1 lncRNA gene, partial sequence
ON426353	Sacchi,C.T., Campos,K.R., Santos,M.B., Reis,A.D., Nogueira,J.S., Maeda,A.Y.	2022-08-22 21:00:00	RP08	Dengue virus	Flavivirus	Flaviviridae	ssRNA(+)	10421	GenBank	partial	V	Brazil: Sao Paulo, Ribeirao Preto	Brazil	Homo sapiens	blood	2021-04-20	Dengue virus 1 isolate RP08 polyprotein (POLY) gene, complete cds; and sfRNA1 lncRNA gene, partial sequence
ON426352	Sacchi,C.T., Campos,K.R., Santos,M.B., Reis,A.D., Nogueira,J.S., Maeda,A.Y.	2022-08-22 21:00:00	RP07	Dengue virus	Flavivirus	Flaviviridae	ssRNA(+)	10421	GenBank	partial	V	Brazil: Sao Paulo, Ribeirao Preto	Brazil	Homo sapiens	blood	2021-03-25	Dengue virus 1 isolate RP07 polyprotein (POLY) gene, complete cds; and sfRNA1 lncRNA gene, partial sequence
ON426351	Sacchi,C.T., Campos,K.R., Santos,M.B., Reis,A.D., Nogueira,J.S., Maeda,A.Y.	2022-08-22 21:00:00	RP06	Dengue virus	Flavivirus	Flaviviridae	ssRNA(+)	10421	GenBank	partial	V	Brazil: Sao Paulo, Ribeirao Preto	Brazil	Homo sapiens	blood	2021-04-04	Dengue virus 1 isolate RP06 polyprotein (POLY) gene, complete cds; and sfRNA1 lncRNA gene, partial sequence
ON426350	Sacchi,C.T., Campos,K.R., Santos,M.B., Reis,A.D., Nogueira,J.S., Maeda,A.Y.	2022-08-22 21:00:00	RP05	Dengue virus	Flavivirus	Flaviviridae	ssRNA(+)	10421	GenBank	partial	V	Brazil: Sao Paulo, Ribeirao Preto	Brazil	Homo sapiens	blood	2021-04-06	Dengue virus 1 isolate RP05 polyprotein (POLY) gene, complete cds; and sfRNA1 lncRNA gene, partial sequence
ON426349	Sacchi,C.T., Campos,K.R., Santos,M.B., Reis,A.D., Nogueira,J.S., Maeda,A.Y.	2022-08-22 21:00:00	RP04	Dengue virus	Flavivirus	Flaviviridae	ssRNA(+)	10421	GenBank	partial	V	Brazil: Sao Paulo, Ribeirao Preto	Brazil	Homo sapiens	blood	2021-03-16	Dengue virus 1 isolate RP04 polyprotein (POLY) gene, complete cds; and sfRNA1 lncRNA gene, partial sequence
ON426348	Sacchi,C.T., Campos,K.R., Santos,M.B., Reis,A.D., Nogueira,J.S., Maeda,A.Y.	2022-08-22 21:00:00	RP03	Dengue virus	Flavivirus	Flaviviridae	ssRNA(+)	10421	GenBank	partial	V	Brazil: Sao Paulo, Ribeirao Preto	Brazil	Homo sapiens	blood	2021-03-22	Dengue virus 1 isolate RP03 polyprotein (POLY) gene, complete cds; and sfRNA1 lncRNA gene, partial sequence
ON426347	Sacchi,C.T., Campos,K.R., Santos,M.B., Reis,A.D., Nogueira,J.S., Maeda,A.Y.	2022-08-22 21:00:00	RP02	Dengue virus	Flavivirus	Flaviviridae	ssRNA(+)	10421	GenBank	partial	V	Brazil: Sao Paulo, Ribeirao Preto	Brazil	Homo sapiens	blood	2021-04-27	Dengue virus 1 isolate RP02 polyprotein (POLY) gene, complete cds; and sfRNA1 lncRNA gene, partial sequence
ON426346	Sacchi,C.T., Campos,K.R., Santos,M.B., Reis,A.D., Nogueira,J.S., Maeda,A.Y.	2022-08-22 21:00:00	RP01	Dengue virus	Flavivirus	Flaviviridae	ssRNA(+)	10421	GenBank	partial	V	Brazil: Sao Paulo, Ribeirao Preto	Brazil	Homo sapiens	blood	2021-04-27	Dengue virus 1 isolate RP01 polyprotein (POLY) gene, complete cds; and sfRNA1 lncRNA gene, partial sequence
ON426345	Sacchi,C.T., Campos,K.R., Santos,M.B., Reis,A.D., Nogueira,J.S., Maeda,A.Y.	2022-08-22 21:00:00	RNA48680	Dengue virus	Flavivirus	Flaviviridae	ssRNA(+)	10421	GenBank	partial	V	Brazil: Sao Paulo, Urania	Brazil	Homo sapiens	blood	2022-03-08	Dengue virus 1 isolate RNA48680 polyprotein (POLY) gene, complete cds; and sfRNA1 lncRNA gene, partial sequence
ON426344	Sacchi,C.T., Campos,K.R., Santos,M.B., Reis,A.D., Nogueira,J.S., Maeda,A.Y.	2022-08-22 21:00:00	RNA48678	Dengue virus	Flavivirus	Flaviviridae	ssRNA(+)	10421	GenBank	partial	V	Brazil: Sao Paulo, Zacarias	Brazil	Homo sapiens	blood	2022-03-11	Dengue virus 1 isolate RNA48678 polyprotein (POLY) gene, complete cds; and sfRNA1 lncRNA gene, partial sequence
ON426343	Sacchi,C.T., Campos,K.R., Santos,M.B., Reis,A.D., Nogueira,J.S., Maeda,A.Y.	2022-08-22 21:00:00	RNA48633	Dengue virus	Flavivirus	Flaviviridae	ssRNA(+)	10353	GenBank	partial	V	Brazil: Sao Paulo, Limeira	Brazil	Homo sapiens	blood	2022-02-25	Dengue virus 1 isolate RNA48633 polyprotein (POLY) gene, complete cds; and sfRNA1 lncRNA gene, partial sequence
ON426342	Sacchi,C.T., Campos,K.R., Santos,M.B., Reis,A.D., Nogueira,J.S., Maeda,A.Y.	2022-08-22 21:00:00	RNA48629	Dengue virus	Flavivirus	Flaviviridae	ssRNA(+)	10353	GenBank	partial	V	Brazil: Sao Paulo, Araras	Brazil	Homo sapiens	blood	2022-02-25	Dengue virus 1 isolate RNA48629 polyprotein (POLY) gene, complete cds; and sfRNA1 lncRNA gene, partial sequence
ON426341	Sacchi,C.T., Campos,K.R., Santos,M.B., Reis,A.D., Nogueira,J.S., Maeda,A.Y.	2022-08-22 21:00:00	RNA48526	Dengue virus	Flavivirus	Flaviviridae	ssRNA(+)	10179	GenBank	partial	V	Brazil: Sao Paulo, Sao Jose do Rio Preto	Brazil	Homo sapiens	blood	2022-02-15	Dengue virus 1 isolate RNA48526 polyprotein (POLY) gene, complete cds
ON426340	Sacchi,C.T., Campos,K.R., Santos,M.B., Reis,A.D., Nogueira,J.S., Maeda,A.Y.	2022-08-22 21:00:00	RNA48522	Dengue virus	Flavivirus	Flaviviridae	ssRNA(+)	10353	GenBank	partial	V	Brazil: Sao Paulo, Votuporanga	Brazil	Homo sapiens	blood	2022-02-18	Dengue virus 1 isolate RNA48522 polyprotein (POLY) gene, complete cds; and sfRNA1 lncRNA gene, partial sequence
ON426339	Sacchi,C.T., Campos,K.R., Santos,M.B., Reis,A.D., Nogueira,J.S., Maeda,A.Y.	2022-08-22 21:00:00	RNA48458	Dengue virus	Flavivirus	Flaviviridae	ssRNA(+)	10421	GenBank	partial	V	Brazil: Sao Paulo, Guarulhos	Brazil	Homo sapiens	blood	2022-02-14	Dengue virus 1 isolate RNA48458 polyprotein (POLY) gene, complete cds; and sfRNA1 lncRNA gene, partial sequence
ON426338	Sacchi,C.T., Campos,K.R., Santos,M.B., Reis,A.D., Nogueira,J.S., Maeda,A.Y.	2022-08-22 21:00:00	RNA47136	Dengue virus	Flavivirus	Flaviviridae	ssRNA(+)	10421	GenBank	partial	V	Brazil: Sao Paulo, Buri	Brazil	Homo sapiens	blood	2021-06-18	Dengue virus 1 isolate RNA47136 polyprotein (POLY) gene, complete cds; and sfRNA1 lncRNA gene, partial sequence
ON426337	Sacchi,C.T., Campos,K.R., Santos,M.B., Reis,A.D., Nogueira,J.S., Maeda,A.Y.	2022-08-22 21:00:00	RNA47079	Dengue virus	Flavivirus	Flaviviridae	ssRNA(+)	10421	GenBank	partial	V	Brazil: Sao Paulo, Campinas	Brazil	Homo sapiens	blood	2021-06-05	Dengue virus 1 isolate RNA47079 polyprotein (POLY) gene, complete cds; and sfRNA1 lncRNA gene, partial sequence
ON426336	Sacchi,C.T., Campos,K.R., Santos,M.B., Reis,A.D., Nogueira,J.S., Maeda,A.Y.	2022-08-22 21:00:00	RNA47013	Dengue virus	Flavivirus	Flaviviridae	ssRNA(+)	10421	GenBank	partial	V	Brazil: Sao Paulo, Santo andre	Brazil	Homo sapiens	blood	2021-04-16	Dengue virus 1 isolate RNA47013 polyprotein (POLY) gene, complete cds; and sfRNA1 lncRNA gene, partial sequence
ON426335	Sacchi,C.T., Campos,K.R., Santos,M.B., Reis,A.D., Nogueira,J.S., Maeda,A.Y.	2022-08-22 21:00:00	RNA46709	Dengue virus	Flavivirus	Flaviviridae	ssRNA(+)	10421	GenBank	partial	V	Brazil: Sao Paulo, Diadema	Brazil	Homo sapiens	blood	2021-05-17	Dengue virus 1 isolate RNA46709 polyprotein (POLY) gene, complete cds; and sfRNA1 lncRNA gene, partial sequence
ON426334	Sacchi,C.T., Campos,K.R., Santos,M.B., Reis,A.D., Nogueira,J.S., Maeda,A.Y.	2022-08-22 21:00:00	RNA46485	Dengue virus	Flavivirus	Flaviviridae	ssRNA(+)	10421	GenBank	partial	V	Brazil: Sao Paulo, Fernandopolis	Brazil	Homo sapiens	blood	2021-04-26	Dengue virus 1 isolate RNA46485 polyprotein (POLY) gene, complete cds; and sfRNA1 lncRNA gene, partial sequence
ON426333	Sacchi,C.T., Campos,K.R., Santos,M.B., Reis,A.D., Nogueira,J.S., Maeda,A.Y.	2022-08-22 21:00:00	RNA46340	Dengue virus	Flavivirus	Flaviviridae	ssRNA(+)	10421	GenBank	partial	V	Brazil: Sao Paulo, Praia Grande	Brazil	Homo sapiens	blood	2021-04-12	Dengue virus 1 isolate RNA46340 polyprotein (POLY) gene, complete cds; and sfRNA1 lncRNA gene, partial sequence
ON426332	Sacchi,C.T., Campos,K.R., Santos,M.B., Reis,A.D., Nogueira,J.S., Maeda,A.Y.	2022-08-22 21:00:00	RNA46251	Dengue virus	Flavivirus	Flaviviridae	ssRNA(+)	10421	GenBank	partial	V	Brazil: Sao Paulo, Sao Jose do Rio Preto	Brazil	Homo sapiens	blood	2021-04-09	Dengue virus 1 isolate RNA46251 polyprotein (POLY) gene, complete cds; and sfRNA1 lncRNA gene, partial sequence
ON426331	Sacchi,C.T., Campos,K.R., Santos,M.B., Reis,A.D., Nogueira,J.S., Maeda,A.Y.	2022-08-22 21:00:00	RNA46091	Dengue virus	Flavivirus	Flaviviridae	ssRNA(+)	10421	GenBank	partial	V	Brazil: Sao Paulo, Osasco	Brazil	Homo sapiens	blood	2021-03-29	Dengue virus 1 isolate RNA46091 polyprotein (POLY) gene, complete cds; and sfRNA1 lncRNA gene, partial sequence
ON426330	Sacchi,C.T., Campos,K.R., Santos,M.B., Reis,A.D., Nogueira,J.S., Maeda,A.Y.	2022-08-22 21:00:00	RNA46053	Dengue virus	Flavivirus	Flaviviridae	ssRNA(+)	10421	GenBank	partial	V	Brazil: Sao Paulo, Sao Jose do Rio Preto	Brazil	Homo sapiens	blood	2021-03-22	Dengue virus 1 isolate RNA46053 polyprotein (POLY) gene, complete cds; and sfRNA1 lncRNA gene, partial sequence
ON426329	Sacchi,C.T., Campos,K.R., Santos,M.B., Reis,A.D., Nogueira,J.S., Maeda,A.Y.	2022-08-22 21:00:00	RNA46012	Dengue virus	Flavivirus	Flaviviridae	ssRNA(+)	10421	GenBank	partial	V	Brazil: Sao Paulo, Miracatu	Brazil	Homo sapiens	blood	2021-03-15	Dengue virus 1 isolate RNA46012 polyprotein (POLY) gene, complete cds; and sfRNA1 lncRNA gene, partial sequence
ON426328	Sacchi,C.T., Campos,K.R., Santos,M.B., Reis,A.D., Nogueira,J.S., Maeda,A.Y.	2022-08-22 21:00:00	RNA44260	Dengue virus	Flavivirus	Flaviviridae	ssRNA(+)	10421	GenBank	partial	V	Brazil: Sao Paulo, Piracicaba	Brazil	Homo sapiens	blood	2020-04-04	Dengue virus 1 isolate RNA44260 polyprotein (POLY) gene, complete cds; and sfRNA1 lncRNA gene, partial sequence
ON426327	Sacchi,C.T., Campos,K.R., Santos,M.B., Reis,A.D., Nogueira,J.S., Maeda,A.Y.	2022-08-22 21:00:00	RNA43933	Dengue virus	Flavivirus	Flaviviridae	ssRNA(+)	10421	GenBank	partial	V	Brazil: Sao Paulo, Cubatao	Brazil	Homo sapiens	blood	2020-03-02	Dengue virus 1 isolate RNA43933 polyprotein (POLY) gene, complete cds; and sfRNA1 lncRNA gene, partial sequence
ON426326	Sacchi,C.T., Campos,K.R., Santos,M.B., Reis,A.D., Nogueira,J.S., Maeda,A.Y.	2022-08-22 21:00:00	RNA43894	Dengue virus	Flavivirus	Flaviviridae	ssRNA(+)	10421	GenBank	partial	V	Brazil: Sao Paulo, Limeira	Brazil	Homo sapiens	blood	2020-03-04	Dengue virus 1 isolate RNA43894 polyprotein (POLY) gene, complete cds; and sfRNA1 lncRNA gene, partial sequence
ON426325	Sacchi,C.T., Campos,K.R., Santos,M.B., Reis,A.D., Nogueira,J.S., Maeda,A.Y.	2022-08-22 21:00:00	RNA43778	Dengue virus	Flavivirus	Flaviviridae	ssRNA(+)	10421	GenBank	partial	V	Brazil: Sao Paulo, Presidente Prudente	Brazil	Homo sapiens	blood	2020-02-25	Dengue virus 1 isolate RNA43778 polyprotein (POLY) gene, complete cds; and sfRNA1 lncRNA gene, partial sequence
ON426324	Sacchi,C.T., Campos,K.R., Santos,M.B., Reis,A.D., Nogueira,J.S., Maeda,A.Y.	2022-08-22 21:00:00	RNA43541	Dengue virus	Flavivirus	Flaviviridae	ssRNA(+)	10421	GenBank	partial	V	Brazil: Sao Paulo, Piracicaba	Brazil	Homo sapiens	blood	2020-01-20	Dengue virus 1 isolate RNA43541 polyprotein (POLY) gene, complete cds; and sfRNA1 lncRNA gene, partial sequence
ON426323	Sacchi,C.T., Campos,K.R., Santos,M.B., Reis,A.D., Nogueira,J.S., Maeda,A.Y.	2022-08-22 21:00:00	RNA43538	Dengue virus	Flavivirus	Flaviviridae	ssRNA(+)	10421	GenBank	partial	V	Brazil: Sao Paulo, Piracicaba	Brazil	Homo sapiens	blood	2020-01-26	Dengue virus 1 isolate RNA43538 polyprotein (POLY) gene, complete cds; and sfRNA1 lncRNA gene, partial sequence
ON426322	Sacchi,C.T., Campos,K.R., Santos,M.B., Reis,A.D., Nogueira,J.S., Maeda,A.Y.	2022-08-22 21:00:00	NS9952	Dengue virus	Flavivirus	Flaviviridae	ssRNA(+)	10421	GenBank	partial	V	Brazil: Sao Paulo, Sorocaba	Brazil	Homo sapiens	blood	2021-05-09	Dengue virus 1 isolate NS9952 polyprotein (POLY) gene, complete cds; and sfRNA1 lncRNA gene, partial sequence
ON426321	Sacchi,C.T., Campos,K.R., Santos,M.B., Reis,A.D., Nogueira,J.S., Maeda,A.Y.	2022-08-22 21:00:00	NS9924	Dengue virus	Flavivirus	Flaviviridae	ssRNA(+)	10421	GenBank	partial	V	Brazil: Sao Paulo, Chavantes	Brazil	Homo sapiens	blood	2021-05-12	Dengue virus 1 isolate NS9924 polyprotein (POLY) gene, complete cds; and sfRNA1 lncRNA gene, partial sequence
ON426320	Sacchi,C.T., Campos,K.R., Santos,M.B., Reis,A.D., Nogueira,J.S., Maeda,A.Y.	2022-08-22 21:00:00	NS9881	Dengue virus	Flavivirus	Flaviviridae	ssRNA(+)	10421	GenBank	partial	V	Brazil: Sao Paulo, Buritama	Brazil	Homo sapiens	blood	2021-04-18	Dengue virus 1 isolate NS9881 polyprotein (POLY) gene, complete cds; and sfRNA1 lncRNA gene, partial sequence
ON426319	Sacchi,C.T., Campos,K.R., Santos,M.B., Reis,A.D., Nogueira,J.S., Maeda,A.Y.	2022-08-22 21:00:00	NS9839	Dengue virus	Flavivirus	Flaviviridae	ssRNA(+)	10421	GenBank	partial	V	Brazil: Sao Paulo, Ipaussu	Brazil	Homo sapiens	blood	2021-05-10	Dengue virus 1 isolate NS9839 polyprotein (POLY) gene, complete cds; and sfRNA1 lncRNA gene, partial sequence
ON426318	Sacchi,C.T., Campos,K.R., Santos,M.B., Reis,A.D., Nogueira,J.S., Maeda,A.Y.	2022-08-22 21:00:00	NS9828	Dengue virus	Flavivirus	Flaviviridae	ssRNA(+)	10421	GenBank	partial	V	Brazil: Sao Paulo, Itanhaem	Brazil	Homo sapiens	blood	2021-04-27	Dengue virus 1 isolate NS9828 polyprotein (POLY) gene, complete cds; and sfRNA1 lncRNA gene, partial sequence
ON426317	Sacchi,C.T., Campos,K.R., Santos,M.B., Reis,A.D., Nogueira,J.S., Maeda,A.Y.	2022-08-22 21:00:00	NS9825	Dengue virus	Flavivirus	Flaviviridae	ssRNA(+)	10421	GenBank	partial	V	Brazil: Sao Paulo, Taubate	Brazil	Homo sapiens	blood	2021-05-08	Dengue virus 1 isolate NS9825 polyprotein (POLY) gene, complete cds; and sfRNA1 lncRNA gene, partial sequence
ON426316	Sacchi,C.T., Campos,K.R., Santos,M.B., Reis,A.D., Nogueira,J.S., Maeda,A.Y.	2022-08-22 21:00:00	NS9811	Dengue virus	Flavivirus	Flaviviridae	ssRNA(+)	10421	GenBank	partial	V	Brazil: Sao Paulo, Val Paraiso	Brazil	Homo sapiens	blood	2021-05-05	Dengue virus 1 isolate NS9811 polyprotein (POLY) gene, complete cds; and sfRNA1 lncRNA gene, partial sequence
ON426315	Sacchi,C.T., Campos,K.R., Santos,M.B., Reis,A.D., Nogueira,J.S., Maeda,A.Y.	2022-08-22 21:00:00	NS9802	Dengue virus	Flavivirus	Flaviviridae	ssRNA(+)	10421	GenBank	partial	V	Brazil: Sao Paulo, Cordeiropolis	Brazil	Homo sapiens	blood	2021-04-23	Dengue virus 1 isolate NS9802 polyprotein (POLY) gene, complete cds; and sfRNA1 lncRNA gene, partial sequence
ON426314	Sacchi,C.T., Campos,K.R., Santos,M.B., Reis,A.D., Nogueira,J.S., Maeda,A.Y.	2022-08-22 21:00:00	NS9668	Dengue virus	Flavivirus	Flaviviridae	ssRNA(+)	10421	GenBank	partial	V	Brazil: Sao Paulo, Mairipora	Brazil	Homo sapiens	blood	2021-04-27	Dengue virus 1 isolate NS9668 polyprotein (POLY) gene, complete cds; and sfRNA1 lncRNA gene, partial sequence
ON426313	Sacchi,C.T., Campos,K.R., Santos,M.B., Reis,A.D., Nogueira,J.S., Maeda,A.Y.	2022-08-22 21:00:00	NS9655	Dengue virus	Flavivirus	Flaviviridae	ssRNA(+)	10421	GenBank	partial	V	Brazil: Sao Paulo, Araras	Brazil	Homo sapiens	blood	2021-04-19	Dengue virus 1 isolate NS9655 polyprotein (POLY) gene, complete cds; and sfRNA1 lncRNA gene, partial sequence
ON426312	Sacchi,C.T., Campos,K.R., Santos,M.B., Reis,A.D., Nogueira,J.S., Maeda,A.Y.	2022-08-22 21:00:00	NS9654	Dengue virus	Flavivirus	Flaviviridae	ssRNA(+)	10421	GenBank	partial	V	Brazil: Sao Paulo, Guaruja	Brazil	Homo sapiens	blood	2021-04-16	Dengue virus 1 isolate NS9654 polyprotein (POLY) gene, complete cds; and sfRNA1 lncRNA gene, partial sequence
ON426311	Sacchi,C.T., Campos,K.R., Santos,M.B., Reis,A.D., Nogueira,J.S., Maeda,A.Y.	2022-08-22 21:00:00	NS9513	Dengue virus	Flavivirus	Flaviviridae	ssRNA(+)	10421	GenBank	partial	V	Brazil: Sao Paulo, Sao Caetano do Sul	Brazil	Homo sapiens	blood	2021-04-19	Dengue virus 1 isolate NS9513 polyprotein (POLY) gene, complete cds; and sfRNA1 lncRNA gene, partial sequence
ON426310	Sacchi,C.T., Campos,K.R., Santos,M.B., Reis,A.D., Nogueira,J.S., Maeda,A.Y.	2022-08-22 21:00:00	NS9487	Dengue virus	Flavivirus	Flaviviridae	ssRNA(+)	10421	GenBank	partial	V	Brazil: Sao Paulo, Ilhabela	Brazil	Homo sapiens	blood	2021-04-13	Dengue virus 1 isolate NS9487 polyprotein (POLY) gene, complete cds; and sfRNA1 lncRNA gene, partial sequence
ON426309	Sacchi,C.T., Campos,K.R., Santos,M.B., Reis,A.D., Nogueira,J.S., Maeda,A.Y.	2022-08-22 21:00:00	NS9453	Dengue virus	Flavivirus	Flaviviridae	ssRNA(+)	10421	GenBank	partial	V	Brazil: Sao Paulo, Cordeiropolis	Brazil	Homo sapiens	blood	2021-04-16	Dengue virus 1 isolate NS9453 polyprotein (POLY) gene, complete cds; and sfRNA1 lncRNA gene, partial sequence
ON426308	Sacchi,C.T., Campos,K.R., Santos,M.B., Reis,A.D., Nogueira,J.S., Maeda,A.Y.	2022-08-22 21:00:00	NS9441	Dengue virus	Flavivirus	Flaviviridae	ssRNA(+)	10421	GenBank	partial	V	Brazil: Sao Paulo, Itai	Brazil	Homo sapiens	blood	2021-04-07	Dengue virus 1 isolate NS9441 polyprotein (POLY) gene, complete cds; and sfRNA1 lncRNA gene, partial sequence
ON426307	Sacchi,C.T., Campos,K.R., Santos,M.B., Reis,A.D., Nogueira,J.S., Maeda,A.Y.	2022-08-22 21:00:00	NS9291	Dengue virus	Flavivirus	Flaviviridae	ssRNA(+)	10421	GenBank	partial	V	Brazil: Sao Paulo, Porto Feliz	Brazil	Homo sapiens	blood	2021-03-15	Dengue virus 1 isolate NS9291 polyprotein (POLY) gene, complete cds; and sfRNA1 lncRNA gene, partial sequence
ON426306	Sacchi,C.T., Campos,K.R., Santos,M.B., Reis,A.D., Nogueira,J.S., Maeda,A.Y.	2022-08-22 21:00:00	NS9278	Dengue virus	Flavivirus	Flaviviridae	ssRNA(+)	10421	GenBank	partial	V	Brazil: Sao Paulo, Porto Feliz	Brazil	Homo sapiens	blood	2021-03-23	Dengue virus 1 isolate NS9278 polyprotein (POLY) gene, complete cds; and sfRNA1 lncRNA gene, partial sequence
ON426305	Sacchi,C.T., Campos,K.R., Santos,M.B., Reis,A.D., Nogueira,J.S., Maeda,A.Y.	2022-08-22 21:00:00	NS9277	Dengue virus	Flavivirus	Flaviviridae	ssRNA(+)	10421	GenBank	partial	V	Brazil: Sao Paulo, Campinas	Brazil	Homo sapiens	blood	2021-03-26	Dengue virus 1 isolate NS9277 polyprotein (POLY) gene, complete cds; and sfRNA1 lncRNA gene, partial sequence
ON426304	Sacchi,C.T., Campos,K.R., Santos,M.B., Reis,A.D., Nogueira,J.S., Maeda,A.Y.	2022-08-22 21:00:00	NS9257	Dengue virus	Flavivirus	Flaviviridae	ssRNA(+)	10421	GenBank	partial	V	Brazil: Sao Paulo, Buri	Brazil	Homo sapiens	blood	2021-04-04	Dengue virus 1 isolate NS9257 polyprotein (POLY) gene, complete cds; and sfRNA1 lncRNA gene, partial sequence
ON426303	Sacchi,C.T., Campos,K.R., Santos,M.B., Reis,A.D., Nogueira,J.S., Maeda,A.Y.	2022-08-22 21:00:00	NS9237	Dengue virus	Flavivirus	Flaviviridae	ssRNA(+)	10421	GenBank	partial	V	Brazil: Sao Paulo, Porto Feliz	Brazil	Homo sapiens	blood	2021-03-23	Dengue virus 1 isolate NS9237 polyprotein (POLY) gene, complete cds; and sfRNA1 lncRNA gene, partial sequence
ON426302	Sacchi,C.T., Campos,K.R., Santos,M.B., Reis,A.D., Nogueira,J.S., Maeda,A.Y.	2022-08-22 21:00:00	NS9225	Dengue virus	Flavivirus	Flaviviridae	ssRNA(+)	10421	GenBank	partial	V	Brazil: Sao Paulo, Tiete	Brazil	Homo sapiens	blood	2021-03-24	Dengue virus 1 isolate NS9225 polyprotein (POLY) gene, complete cds; and sfRNA1 lncRNA gene, partial sequence
ON426301	Sacchi,C.T., Campos,K.R., Santos,M.B., Reis,A.D., Nogueira,J.S., Maeda,A.Y.	2022-08-22 21:00:00	NS9197	Dengue virus	Flavivirus	Flaviviridae	ssRNA(+)	10421	GenBank	partial	V	Brazil: Sao Paulo, Buritama	Brazil	Homo sapiens	blood	2021-03-16	Dengue virus 1 isolate NS9197 polyprotein (POLY) gene, complete cds; and sfRNA1 lncRNA gene, partial sequence
ON426300	Sacchi,C.T., Campos,K.R., Santos,M.B., Reis,A.D., Nogueira,J.S., Maeda,A.Y.	2022-08-22 21:00:00	NS9144	Dengue virus	Flavivirus	Flaviviridae	ssRNA(+)	10421	GenBank	partial	V	Brazil: Sao Paulo, Nazare Paulista	Brazil	Homo sapiens	blood	2021-03-26	Dengue virus 1 isolate NS9144 polyprotein (POLY) gene, complete cds; and sfRNA1 lncRNA gene, partial sequence
ON426299	Sacchi,C.T., Campos,K.R., Santos,M.B., Reis,A.D., Nogueira,J.S., Maeda,A.Y.	2022-08-22 21:00:00	NS9136	Dengue virus	Flavivirus	Flaviviridae	ssRNA(+)	10421	GenBank	partial	V	Brazil: Sao Paulo, Louveira	Brazil	Homo sapiens	blood	2021-03-20	Dengue virus 1 isolate NS9136 polyprotein (POLY) gene, complete cds; and sfRNA1 lncRNA gene, partial sequence
ON426298	Sacchi,C.T., Campos,K.R., Santos,M.B., Reis,A.D., Nogueira,J.S., Maeda,A.Y.	2022-08-22 21:00:00	NS9062	Dengue virus	Flavivirus	Flaviviridae	ssRNA(+)	10421	GenBank	partial	V	Brazil: Sao Paulo, Miracatu	Brazil	Homo sapiens	blood	2021-03-15	Dengue virus 1 isolate NS9062 polyprotein (POLY) gene, complete cds; and sfRNA1 lncRNA gene, partial sequence
ON426297	Sacchi,C.T., Campos,K.R., Santos,M.B., Reis,A.D., Nogueira,J.S., Maeda,A.Y.	2022-08-22 21:00:00	NS9023	Dengue virus	Flavivirus	Flaviviridae	ssRNA(+)	10421	GenBank	partial	V	Brazil: Sao Paulo, Sumare	Brazil	Homo sapiens	blood	2021-03-15	Dengue virus 1 isolate NS9023 polyprotein (POLY) gene, complete cds; and sfRNA1 lncRNA gene, partial sequence
ON426296	Sacchi,C.T., Campos,K.R., Santos,M.B., Reis,A.D., Nogueira,J.S., Maeda,A.Y.	2022-08-22 21:00:00	NS8902	Dengue virus	Flavivirus	Flaviviridae	ssRNA(+)	10421	GenBank	partial	V	Brazil: Sao Paulo, Sao Vicente	Brazil	Homo sapiens	blood	2021-02-21	Dengue virus 1 isolate NS8902 polyprotein (POLY) gene, complete cds; and sfRNA1 lncRNA gene, partial sequence
ON426295	Sacchi,C.T., Campos,K.R., Santos,M.B., Reis,A.D., Nogueira,J.S., Maeda,A.Y.	2022-08-22 21:00:00	NS8898	Dengue virus	Flavivirus	Flaviviridae	ssRNA(+)	10421	GenBank	partial	V	Brazil: Sao Paulo, Sao Vicente	Brazil	Homo sapiens	blood	2021-02-18	Dengue virus 1 isolate NS8898 polyprotein (POLY) gene, complete cds; and sfRNA1 lncRNA gene, partial sequence
ON426294	Sacchi,C.T., Campos,K.R., Santos,M.B., Reis,A.D., Nogueira,J.S., Maeda,A.Y.	2022-08-22 21:00:00	NS8530	Dengue virus	Flavivirus	Flaviviridae	ssRNA(+)	10421	GenBank	partial	V	Brazil: Sao Paulo, Santos	Brazil	Homo sapiens	blood	2021-01-20	Dengue virus 1 isolate NS8530 polyprotein (POLY) gene, complete cds; and sfRNA1 lncRNA gene, partial sequence
ON426293	Sacchi,C.T., Campos,K.R., Santos,M.B., Reis,A.D., Nogueira,J.S., Maeda,A.Y.	2022-08-22 21:00:00	NS8014	Dengue virus	Flavivirus	Flaviviridae	ssRNA(+)	10421	GenBank	partial	V	Brazil: Sao Paulo, Sao Pedro	Brazil	Homo sapiens	blood	2020-02-09	Dengue virus 1 isolate NS8014 polyprotein (POLY) gene, complete cds; and sfRNA1 lncRNA gene, partial sequence
ON426292	Sacchi,C.T., Campos,K.R., Santos,M.B., Reis,A.D., Nogueira,J.S., Maeda,A.Y.	2022-08-22 21:00:00	NS6378	Dengue virus	Flavivirus	Flaviviridae	ssRNA(+)	10421	GenBank	partial	V	Brazil: Sao Paulo, Sao Pedro	Brazil	Homo sapiens	blood	2020-01-22	Dengue virus 1 isolate NS6378 polyprotein (POLY) gene, complete cds; and sfRNA1 lncRNA gene, partial sequence
ON426291	Sacchi,C.T., Campos,K.R., Santos,M.B., Reis,A.D., Nogueira,J.S., Maeda,A.Y.	2022-08-22 21:00:00	NS11238	Dengue virus	Flavivirus	Flaviviridae	ssRNA(+)	10179	GenBank	partial	V	Brazil: Sao Paulo, Paulinia	Brazil	Homo sapiens	blood	2022-03-11	Dengue virus 1 isolate NS11238 polyprotein (POLY) gene, complete cds
ON426290	Sacchi,C.T., Campos,K.R., Santos,M.B., Reis,A.D., Nogueira,J.S., Maeda,A.Y.	2022-08-22 21:00:00	NS11237	Dengue virus	Flavivirus	Flaviviridae	ssRNA(+)	10353	GenBank	partial	V	Brazil: Sao Paulo, Campinas	Brazil	Homo sapiens	blood	2022-03-16	Dengue virus 1 isolate NS11237 polyprotein (POLY) gene, complete cds; and sfRNA1 lncRNA gene, partial sequence
ON426289	Sacchi,C.T., Campos,K.R., Santos,M.B., Reis,A.D., Nogueira,J.S., Maeda,A.Y.	2022-08-22 21:00:00	NS11210	Dengue virus	Flavivirus	Flaviviridae	ssRNA(+)	10421	GenBank	partial	V	Brazil: Sao Paulo, Aracatuba	Brazil	Homo sapiens	blood	2022-02-25	Dengue virus 1 isolate NS11210 polyprotein (POLY) gene, complete cds; and sfRNA1 lncRNA gene, partial sequence
ON426288	Sacchi,C.T., Campos,K.R., Santos,M.B., Reis,A.D., Nogueira,J.S., Maeda,A.Y.	2022-08-22 21:00:00	NS11202	Dengue virus	Flavivirus	Flaviviridae	ssRNA(+)	10217	GenBank	partial	V	Brazil: Sao Paulo, Andradina	Brazil	Homo sapiens	blood	2022-02-17	Dengue virus 1 isolate NS11202 polyprotein (POLY) gene, complete cds
ON426287	Sacchi,C.T., Campos,K.R., Santos,M.B., Reis,A.D., Nogueira,J.S., Maeda,A.Y.	2022-08-22 21:00:00	NS11174	Dengue virus	Flavivirus	Flaviviridae	ssRNA(+)	10179	GenBank	partial	V	Brazil: Sao Paulo, Ilha Solteira	Brazil	Homo sapiens	blood	2022-03-04	Dengue virus 1 isolate NS11174 polyprotein (POLY) gene, complete cds
ON426286	Sacchi,C.T., Campos,K.R., Santos,M.B., Reis,A.D., Nogueira,J.S., Maeda,A.Y.	2022-08-22 21:00:00	NS11151	Dengue virus	Flavivirus	Flaviviridae	ssRNA(+)	10353	GenBank	partial	V	Brazil: Sao Paulo, Aracatuba	Brazil	Homo sapiens	blood	2022-03-11	Dengue virus 1 isolate NS11151 polyprotein (POLY) gene, complete cds; and sfRNA1 lncRNA gene, partial sequence
ON426285	Sacchi,C.T., Campos,K.R., Santos,M.B., Reis,A.D., Nogueira,J.S., Maeda,A.Y.	2022-08-22 21:00:00	NS11131	Dengue virus	Flavivirus	Flaviviridae	ssRNA(+)	10179	GenBank	partial	V	Brazil: Sao Paulo, Tiete	Brazil	Homo sapiens	blood	2022-02-23	Dengue virus 1 isolate NS11131 polyprotein (POLY) gene, complete cds
ON426284	Sacchi,C.T., Campos,K.R., Santos,M.B., Reis,A.D., Nogueira,J.S., Maeda,A.Y.	2022-08-22 21:00:00	NS11094	Dengue virus	Flavivirus	Flaviviridae	ssRNA(+)	10421	GenBank	partial	V	Brazil: Sao Paulo, Sao Jose dos Campos	Brazil	Homo sapiens	blood	2022-03-11	Dengue virus 1 isolate NS11094 polyprotein (POLY) gene, complete cds; and sfRNA1 lncRNA gene, partial sequence
ON426283	Sacchi,C.T., Campos,K.R., Santos,M.B., Reis,A.D., Nogueira,J.S., Maeda,A.Y.	2022-08-22 21:00:00	NS11047	Dengue virus	Flavivirus	Flaviviridae	ssRNA(+)	10353	GenBank	partial	V	Brazil: Sao Paulo, Taubate	Brazil	Homo sapiens	blood	2022-03-14	Dengue virus 1 isolate NS11047 polyprotein (POLY) gene, complete cds; and sfRNA1 lncRNA gene, partial sequence
ON426282	Sacchi,C.T., Campos,K.R., Santos,M.B., Reis,A.D., Nogueira,J.S., Maeda,A.Y.	2022-08-22 21:00:00	NS11005	Dengue virus	Flavivirus	Flaviviridae	ssRNA(+)	10337	GenBank	partial	V	Brazil: Sao Paulo, Marilia	Brazil	Homo sapiens	blood	2022-03-08	Dengue virus 1 isolate NS11005 polyprotein (POLY) gene, complete cds; and sfRNA1 lncRNA gene, partial sequence
ON426281	Sacchi,C.T., Campos,K.R., Santos,M.B., Reis,A.D., Nogueira,J.S., Maeda,A.Y.	2022-08-22 21:00:00	NS10998	Dengue virus	Flavivirus	Flaviviridae	ssRNA(+)	10421	GenBank	partial	V	Brazil: Sao Paulo, Itapetininga	Brazil	Homo sapiens	blood	2022-03-07	Dengue virus 1 isolate NS10998 polyprotein (POLY) gene, complete cds; and sfRNA1 lncRNA gene, partial sequence
ON426280	Sacchi,C.T., Campos,K.R., Santos,M.B., Reis,A.D., Nogueira,J.S., Maeda,A.Y.	2022-08-22 21:00:00	NS10991	Dengue virus	Flavivirus	Flaviviridae	ssRNA(+)	10353	GenBank	partial	V	Brazil: Sao Paulo, Garca	Brazil	Homo sapiens	blood	2022-03-07	Dengue virus 1 isolate NS10991 polyprotein (POLY) gene, complete cds; and sfRNA1 lncRNA gene, partial sequence
ON426279	Sacchi,C.T., Campos,K.R., Santos,M.B., Reis,A.D., Nogueira,J.S., Maeda,A.Y.	2022-08-22 21:00:00	NS10979	Dengue virus	Flavivirus	Flaviviridae	ssRNA(+)	10248	GenBank	partial	V	Brazil: Sao Paulo, Bauru	Brazil	Homo sapiens	blood	2022-02-21	Dengue virus 1 isolate NS10979 polyprotein (POLY) gene, complete cds; and sfRNA1 lncRNA gene, partial sequence
ON426278	Sacchi,C.T., Campos,K.R., Santos,M.B., Reis,A.D., Nogueira,J.S., Maeda,A.Y.	2022-08-22 21:00:00	NS10977	Dengue virus	Flavivirus	Flaviviridae	ssRNA(+)	10179	GenBank	partial	V	Brazil: Sao Paulo, Bauru	Brazil	Homo sapiens	blood	2022-02-24	Dengue virus 1 isolate NS10977 polyprotein (POLY) gene, complete cds
ON426277	Sacchi,C.T., Campos,K.R., Santos,M.B., Reis,A.D., Nogueira,J.S., Maeda,A.Y.	2022-08-22 21:00:00	NS10973	Dengue virus	Flavivirus	Flaviviridae	ssRNA(+)	10247	GenBank	partial	V	Brazil: Sao Paulo, Bauru	Brazil	Homo sapiens	blood	2022-02-22	Dengue virus 1 isolate NS10973 polyprotein (POLY) gene, complete cds
ON426276	Sacchi,C.T., Campos,K.R., Santos,M.B., Reis,A.D., Nogueira,J.S., Maeda,A.Y.	2022-08-22 21:00:00	NS10957	Dengue virus	Flavivirus	Flaviviridae	ssRNA(+)	10421	GenBank	partial	V	Brazil: Sao Paulo, Rio Claro	Brazil	Homo sapiens	blood	2022-03-02	Dengue virus 1 isolate NS10957 polyprotein (POLY) gene, complete cds; and sfRNA1 lncRNA gene, partial sequence
ON426275	Sacchi,C.T., Campos,K.R., Santos,M.B., Reis,A.D., Nogueira,J.S., Maeda,A.Y.	2022-08-22 21:00:00	NS10949	Dengue virus	Flavivirus	Flaviviridae	ssRNA(+)	10421	GenBank	partial	V	Brazil: Sao Paulo, Sao Jose dos Campos	Brazil	Homo sapiens	blood	2022-02-21	Dengue virus 1 isolate NS10949 polyprotein (POLY) gene, complete cds; and sfRNA1 lncRNA gene, partial sequence
ON426274	Sacchi,C.T., Campos,K.R., Santos,M.B., Reis,A.D., Nogueira,J.S., Maeda,A.Y.	2022-08-22 21:00:00	NS10928	Dengue virus	Flavivirus	Flaviviridae	ssRNA(+)	10421	GenBank	partial	V	Brazil: Sao Paulo, Porto Feliz	Brazil	Homo sapiens	blood	2022-02-21	Dengue virus 1 isolate NS10928 polyprotein (POLY) gene, complete cds; and sfRNA1 lncRNA gene, partial sequence
ON426273	Sacchi,C.T., Campos,K.R., Santos,M.B., Reis,A.D., Nogueira,J.S., Maeda,A.Y.	2022-08-22 21:00:00	NS10908	Dengue virus	Flavivirus	Flaviviridae	ssRNA(+)	10421	GenBank	partial	V	Brazil: Sao Paulo, Birigui	Brazil	Homo sapiens	blood	2022-02-16	Dengue virus 1 isolate NS10908 polyprotein (POLY) gene, complete cds; and sfRNA1 lncRNA gene, partial sequence
ON426272	Sacchi,C.T., Campos,K.R., Santos,M.B., Reis,A.D., Nogueira,J.S., Maeda,A.Y.	2022-08-22 21:00:00	NS10862	Dengue virus	Flavivirus	Flaviviridae	ssRNA(+)	10337	GenBank	partial	V	Brazil: Sao Paulo, Sao Jose dos Campos	Brazil	Homo sapiens	blood	2022-02-09	Dengue virus 1 isolate NS10862 polyprotein (POLY) gene, complete cds; and sfRNA1 lncRNA gene, partial sequence
ON426271	Sacchi,C.T., Campos,K.R., Santos,M.B., Reis,A.D., Nogueira,J.S., Maeda,A.Y.	2022-08-22 21:00:00	NS10851	Dengue virus	Flavivirus	Flaviviridae	ssRNA(+)	10247	GenBank	partial	V	Brazil: Sao Paulo, Galia	Brazil	Homo sapiens	blood	2022-02-09	Dengue virus 1 isolate NS10851 polyprotein (POLY) gene, complete cds
ON426270	Sacchi,C.T., Campos,K.R., Santos,M.B., Reis,A.D., Nogueira,J.S., Maeda,A.Y.	2022-08-22 21:00:00	NS10810	Dengue virus	Flavivirus	Flaviviridae	ssRNA(+)	10247	GenBank	partial	V	Brazil: Sao Paulo, Alto Alegre	Brazil	Homo sapiens	blood	2022-01-31	Dengue virus 1 isolate NS10810 polyprotein (POLY) gene, complete cds
ON426269	Sacchi,C.T., Campos,K.R., Santos,M.B., Reis,A.D., Nogueira,J.S., Maeda,A.Y.	2022-08-22 21:00:00	NS10805	Dengue virus	Flavivirus	Flaviviridae	ssRNA(+)	10179	GenBank	partial	V	Brazil: Sao Paulo, Aracatuba	Brazil	Homo sapiens	blood	2022-01-28	Dengue virus 1 isolate NS10805 polyprotein (POLY) gene, complete cds
ON426268	Sacchi,C.T., Campos,K.R., Santos,M.B., Reis,A.D., Nogueira,J.S., Maeda,A.Y.	2022-08-22 21:00:00	NS10682	Dengue virus	Flavivirus	Flaviviridae	ssRNA(+)	10353	GenBank	partial	V	Brazil: Sao Paulo, Buritama	Brazil	Homo sapiens	blood	2022-01-13	Dengue virus 1 isolate NS10682 polyprotein (POLY) gene, complete cds; and sfRNA1 lncRNA gene, partial sequence
ON426267	Sacchi,C.T., Campos,K.R., Santos,M.B., Reis,A.D., Nogueira,J.S., Maeda,A.Y.	2022-08-22 21:00:00	NS10089	Dengue virus	Flavivirus	Flaviviridae	ssRNA(+)	10421	GenBank	partial	V	Brazil: Sao Paulo, Capao Bonito	Brazil	Homo sapiens	blood	2021-05-26	Dengue virus 1 isolate NS10089 polyprotein (POLY) gene, complete cds; and sfRNA1 lncRNA gene, partial sequence
ON426266	Sacchi,C.T., Campos,K.R., Santos,M.B., Reis,A.D., Nogueira,J.S., Maeda,A.Y.	2022-08-22 21:00:00	NS10085	Dengue virus	Flavivirus	Flaviviridae	ssRNA(+)	10421	GenBank	partial	V	Brazil: Sao Paulo, Tupa	Brazil	Homo sapiens	blood	2021-05-31	Dengue virus 1 isolate NS10085 polyprotein (POLY) gene, complete cds; and sfRNA1 lncRNA gene, partial sequence
ON426265	Sacchi,C.T., Campos,K.R., Santos,M.B., Reis,A.D., Nogueira,J.S., Maeda,A.Y.	2022-08-22 21:00:00	NS10084	Dengue virus	Flavivirus	Flaviviridae	ssRNA(+)	10421	GenBank	partial	V	Brazil: Sao Paulo, Capao Bonito	Brazil	Homo sapiens	blood	2021-05-25	Dengue virus 1 isolate NS10084 polyprotein (POLY) gene, complete cds; and sfRNA1 lncRNA gene, partial sequence
ON426264	Sacchi,C.T., Campos,K.R., Santos,M.B., Reis,A.D., Nogueira,J.S., Maeda,A.Y.	2022-08-22 21:00:00	NS10078	Dengue virus	Flavivirus	Flaviviridae	ssRNA(+)	10421	GenBank	partial	V	Brazil: Sao Paulo, Itirepina	Brazil	Homo sapiens	blood	2021-06-01	Dengue virus 1 isolate NS10078 polyprotein (POLY) gene, complete cds; and sfRNA1 lncRNA gene, partial sequence
ON426263	Sacchi,C.T., Campos,K.R., Santos,M.B., Reis,A.D., Nogueira,J.S., Maeda,A.Y.	2022-08-22 21:00:00	NS10073	Dengue virus	Flavivirus	Flaviviridae	ssRNA(+)	10421	GenBank	partial	V	Brazil: Sao Paulo, Aracatuba	Brazil	Homo sapiens	blood	2021-06-01	Dengue virus 1 isolate NS10073 polyprotein (POLY) gene, complete cds; and sfRNA1 lncRNA gene, partial sequence
ON426262	Sacchi,C.T., Campos,K.R., Santos,M.B., Reis,A.D., Nogueira,J.S., Maeda,A.Y.	2022-08-22 21:00:00	NS10022	Dengue virus	Flavivirus	Flaviviridae	ssRNA(+)	10421	GenBank	partial	V	Brazil: Sao Paulo, Paulinia	Brazil	Homo sapiens	blood	2021-05-25	Dengue virus 1 isolate NS10022 polyprotein (POLY) gene, complete cds; and sfRNA1 lncRNA gene, partial sequence
ON426261	Sacchi,C.T., Campos,K.R., Santos,M.B., Reis,A.D., Nogueira,J.S., Maeda,A.Y.	2022-08-22 21:00:00	46425	Dengue virus	Flavivirus	Flaviviridae	ssRNA(+)	10421	GenBank	partial	V	Brazil: Sao Paulo, Alambari	Brazil	Homo sapiens	blood	2021-04-26	Dengue virus 1 isolate 46425 polyprotein (POLY) gene, complete cds; and sfRNA1 lncRNA gene, partial sequence
ON123671	Maurya,R., Agrawal,T., Saraswat,S., Ananthraj,A., Chandele,A., Kumar,S., Kanakan,A., Chattopadhyay,P., Swaminathan,A., Saifi,S., Shashi,P., Pandey,R., Medigeshi,G.R.	2022-04-04 21:00:00	THSTI-TRC-DENV1-15	Dengue virus	Flavivirus	Flaviviridae	ssRNA(+)	10586	GenBank	partial		India	India	Homo sapiens	blood	2018-01-01	Dengue virus type I isolate THSTI-TRC-DENV1-15 polyprotein (POLY) gene, complete cds; and sfRNA1 lncRNA gene, partial sequence
ON123667	Maurya,R., Agrawal,T., Saraswat,S., Ananthraj,A., Chandele,A., Kumar,S., Kanakan,A., Chattopadhyay,P., Swaminathan,A., Saifi,S., Shashi,P., Pandey,R., Medigeshi,G.R.	2022-04-04 21:00:00	THSTI-TRC-DENV1-14	Dengue virus	Flavivirus	Flaviviridae	ssRNA(+)	10735	GenBank	complete		India	India	Homo sapiens	blood	2018-01-01	Dengue virus type I isolate THSTI-TRC-DENV1-14, complete genome
ON123666	Maurya,R., Agrawal,T., Saraswat,S., Ananthraj,A., Chandele,A., Kumar,S., Kanakan,A., Chattopadhyay,P., Swaminathan,A., Saifi,S., Shashi,P., Pandey,R., Medigeshi,G.R.	2022-04-04 21:00:00	THSTI-TRC-DENV1-13	Dengue virus	Flavivirus	Flaviviridae	ssRNA(+)	10735	GenBank	partial		India	India	Homo sapiens	blood	2018-01-01	Dengue virus type I isolate THSTI-TRC-DENV1-13 polyprotein (POLY) gene, complete cds; and sfRNA1 lncRNA gene, complete sequence
ON123664	Maurya,R., Agrawal,T., Saraswat,S., Ananthraj,A., Chandele,A., Kumar,S., Kanakan,A., Chattopadhyay,P., Swaminathan,A., Saifi,S., Shashi,P., Pandey,R., Medigeshi,G.R.	2022-04-04 21:00:00	THSTI-TRC-DENV1-12	Dengue virus	Flavivirus	Flaviviridae	ssRNA(+)	10735	GenBank	complete		India	India	Homo sapiens	blood	2018-01-01	Dengue virus type I isolate THSTI-TRC-DENV1-12, complete genome
ON123661	Maurya,R., Agrawal,T., Saraswat,S., Ananthraj,A., Chandele,A., Kumar,S., Kanakan,A., Chattopadhyay,P., Swaminathan,A., Saifi,S., Shashi,P., Pandey,R., Medigeshi,G.R.	2022-04-04 21:00:00	THSTI-TRC-DENV1-11	Dengue virus	Flavivirus	Flaviviridae	ssRNA(+)	10735	GenBank	complete		India	India	Homo sapiens	blood	2018-01-01	Dengue virus type I isolate THSTI-TRC-DENV1-11, complete genome
ON123657	Maurya,R., Agrawal,T., Saraswat,S., Ananthraj,A., Chandele,A., Kumar,S., Kanakan,A., Chattopadhyay,P., Swaminathan,A., Saifi,S., Shashi,P., Pandey,R., Medigeshi,G.R.	2022-04-04 21:00:00	THSTI-TRC-DENV1-10	Dengue virus	Flavivirus	Flaviviridae	ssRNA(+)	10735	GenBank	complete		India	India	Homo sapiens	blood	2019-01-01	Dengue virus type I isolate THSTI-TRC-DENV1-10, complete genome
ON123654	Maurya,R., Agrawal,T., Saraswat,S., Ananthraj,A., Chandele,A., Kumar,S., Kanakan,A., Chattopadhyay,P., Swaminathan,A., Saifi,S., Shashi,P., Pandey,R., Medigeshi,G.R.	2022-04-04 21:00:00	THSTI-TRC-DENV1-06	Dengue virus	Flavivirus	Flaviviridae	ssRNA(+)	10735	GenBank	complete		India	India	Homo sapiens	blood	2020-01-01	Dengue virus type I isolate THSTI-TRC-DENV1-06, complete genome
ON123653	Maurya,R., Agrawal,T., Saraswat,S., Ananthraj,A., Chandele,A., Kumar,S., Kanakan,A., Chattopadhyay,P., Swaminathan,A., Saifi,S., Shashi,P., Pandey,R., Medigeshi,G.R.	2022-04-04 21:00:00	THSTI-TRC-DENV1-05	Dengue virus	Flavivirus	Flaviviridae	ssRNA(+)	10586	GenBank	partial		India	India	Homo sapiens	blood	2020-01-01	Dengue virus type I isolate THSTI-TRC-DENV1-05 polyprotein (POLY) gene, complete cds; and sfRNA1 lncRNA gene, partial sequence
ON123650	Maurya,R., Agrawal,T., Saraswat,S., Ananthraj,A., Chandele,A., Kumar,S., Kanakan,A., Chattopadhyay,P., Swaminathan,A., Saifi,S., Shashi,P., Pandey,R., Medigeshi,G.R.	2022-04-04 21:00:00	THSTI-TRC-DENV1-04	Dengue virus	Flavivirus	Flaviviridae	ssRNA(+)	10735	GenBank	complete		India	India	Homo sapiens	blood	2020-01-01	Dengue virus type I isolate THSTI-TRC-DENV1-04, complete genome
ON123648	Maurya,R., Agrawal,T., Saraswat,S., Ananthraj,A., Chandele,A., Kumar,S., Kanakan,A., Chattopadhyay,P., Swaminathan,A., Saifi,S., Shashi,P., Pandey,R., Medigeshi,G.R.	2022-04-04 21:00:00	THSTI-TRC-DENV1-03	Dengue virus	Flavivirus	Flaviviridae	ssRNA(+)	10586	GenBank	partial		India	India	Homo sapiens	blood	2019-01-01	Dengue virus type I isolate THSTI-TRC-DENV1-03 polyprotein (POLY) gene, complete cds; and sfRNA1 lncRNA gene, partial sequence
ON123647	Maurya,R., Agrawal,T., Saraswat,S., Ananthraj,A., Chandele,A., Kumar,S., Kanakan,A., Chattopadhyay,P., Swaminathan,A., Saifi,S., Shashi,P., Pandey,R., Medigeshi,G.R.	2022-04-04 21:00:00	THSTI-TRC-DENV1-02	Dengue virus	Flavivirus	Flaviviridae	ssRNA(+)	10588	GenBank	partial		India	India	Homo sapiens	blood	2019-01-01	Dengue virus type I isolate THSTI-TRC-DENV1-02 polyprotein (POLY) gene, complete cds; and sfRNA1 lncRNA gene, partial sequence
ON123646	Maurya,R., Agrawal,T., Saraswat,S., Ananthraj,A., Chandele,A., Kumar,S., Kanakan,A., Chattopadhyay,P., Swaminathan,A., Saifi,S., Shashi,P., Pandey,R., Medigeshi,G.R.	2022-04-04 21:00:00	THSTI-TRC-DENV1-01	Dengue virus	Flavivirus	Flaviviridae	ssRNA(+)	10735	GenBank	complete		India	India	Homo sapiens	blood	2020-01-01	Dengue virus type I isolate THSTI-TRC-DENV1-01, complete genome
ON123604	Espejo,V.I., Troncos,G.M., Cruz,C.D., Olivos,J.M., Ramos,R.E., Chuquirachi,F.J., Ocana,V.R., Holguin,C.E., Cedano,L.E., Ampuero,J.S., Tinoco,Y.O., Graf,P.C.	2022-04-04 21:00:00	FPY01548/LOR-PER/2021	Dengue virus	Flavivirus	Flaviviridae	ssRNA(+)	10636	GenBank	partial	V	Peru	Peru		blood	2021-09-18	Dengue virus 1 isolate FPY01548/LOR-PER/2021 polyprotein (POLY) gene, complete cds; and sfRNA1 lncRNA gene, partial sequence
ON123603	Espejo,V.I., Troncos,G.M., Cruz,C.D., Olivos,J.M., Ramos,R.E., Chuquirachi,F.J., Ocana,V.R., Holguin,C.E., Cedano,L.E., Ampuero,J.S., Tinoco,Y.O., Graf,P.C.	2022-04-04 21:00:00	FPY01547/LOR-PER/2021	Dengue virus	Flavivirus	Flaviviridae	ssRNA(+)	10636	GenBank	partial	V	Peru	Peru		blood	2021-09-17	Dengue virus 1 isolate FPY01547/LOR-PER/2021 polyprotein (POLY) gene, complete cds; and sfRNA1 lncRNA gene, partial sequence
ON123602	Espejo,V.I., Troncos,G.M., Cruz,C.D., Olivos,J.M., Ramos,R.E., Chuquirachi,F.J., Ocana,V.R., Holguin,C.E., Cedano,L.E., Ampuero,J.S., Tinoco,Y.O., Graf,P.C.	2022-04-04 21:00:00	FPY01546/LOR-PER/2021	Dengue virus	Flavivirus	Flaviviridae	ssRNA(+)	10636	GenBank	partial	V	Peru	Peru		blood	2021-09-17	Dengue virus 1 isolate FPY01546/LOR-PER/2021 polyprotein (POLY) gene, complete cds; and sfRNA1 lncRNA gene, partial sequence
ON123601	Espejo,V.I., Troncos,G.M., Cruz,C.D., Olivos,J.M., Ramos,R.E., Chuquirachi,F.J., Ocana,V.R., Holguin,C.E., Cedano,L.E., Ampuero,J.S., Tinoco,Y.O., Graf,P.C.	2022-04-04 21:00:00	FPY01543/LOR-PER/2021	Dengue virus	Flavivirus	Flaviviridae	ssRNA(+)	10636	GenBank	partial	V	Peru	Peru		blood	2021-09-08	Dengue virus 1 isolate FPY01543/LOR-PER/2021 polyprotein (POLY) gene, complete cds; and sfRNA1 lncRNA gene, partial sequence
ON123600	Espejo,V.I., Troncos,G.M., Cruz,C.D., Olivos,J.M., Ramos,R.E., Chuquirachi,F.J., Ocana,V.R., Holguin,C.E., Cedano,L.E., Ampuero,J.S., Tinoco,Y.O., Graf,P.C.	2022-04-04 21:00:00	FPY01535/LOR-PER/2021	Dengue virus	Flavivirus	Flaviviridae	ssRNA(+)	10636	GenBank	partial	V	Peru	Peru		blood	2021-08-30	Dengue virus 1 isolate FPY01535/LOR-PER/2021 polyprotein (POLY) gene, complete cds; and sfRNA1 lncRNA gene, partial sequence
ON123599	Espejo,V.I., Troncos,G.M., Cruz,C.D., Olivos,J.M., Ramos,R.E., Chuquirachi,F.J., Ocana,V.R., Holguin,C.E., Cedano,L.E., Ampuero,J.S., Tinoco,Y.O., Graf,P.C.	2022-04-04 21:00:00	FPY01536/LOR-PER/2021	Dengue virus	Flavivirus	Flaviviridae	ssRNA(+)	10636	GenBank	partial	V	Peru	Peru		blood	2021-08-28	Dengue virus 1 isolate FPY01536/LOR-PER/2021 polyprotein (POLY) gene, complete cds; and sfRNA1 lncRNA gene, partial sequence
ON123598	Espejo,V.I., Troncos,G.M., Cruz,C.D., Olivos,J.M., Ramos,R.E., Chuquirachi,F.J., Ocana,V.R., Holguin,C.E., Cedano,L.E., Ampuero,J.S., Tinoco,Y.O., Graf,P.C.	2022-04-04 21:00:00	FPY01534/LOR-PER/2021	Dengue virus	Flavivirus	Flaviviridae	ssRNA(+)	10636	GenBank	partial	V	Peru	Peru		blood	2021-08-27	Dengue virus 1 isolate FPY01534/LOR-PER/2021 polyprotein (POLY) gene, complete cds; and sfRNA1 lncRNA gene, partial sequence
ON123597	Espejo,V.I., Troncos,G.M., Cruz,C.D., Olivos,J.M., Ramos,R.E., Chuquirachi,F.J., Ocana,V.R., Holguin,C.E., Cedano,L.E., Ampuero,J.S., Tinoco,Y.O., Graf,P.C.	2022-04-04 21:00:00	FPY01530/LOR-PER/2021	Dengue virus	Flavivirus	Flaviviridae	ssRNA(+)	10636	GenBank	partial	V	Peru	Peru		blood	2021-08-23	Dengue virus 1 isolate FPY01530/LOR-PER/2021 polyprotein (POLY) gene, complete cds; and sfRNA1 lncRNA gene, partial sequence
ON123596	Espejo,V.I., Troncos,G.M., Cruz,C.D., Olivos,J.M., Ramos,R.E., Chuquirachi,F.J., Ocana,V.R., Holguin,C.E., Cedano,L.E., Ampuero,J.S., Tinoco,Y.O., Graf,P.C.	2022-04-04 21:00:00	FPY01529/LOR-PER/2021	Dengue virus	Flavivirus	Flaviviridae	ssRNA(+)	10636	GenBank	partial	V	Peru	Peru		blood	2021-08-20	Dengue virus 1 isolate FPY01529/LOR-PER/2021 polyprotein (POLY) gene, complete cds; and sfRNA1 lncRNA gene, partial sequence
ON123595	Espejo,V.I., Troncos,G.M., Cruz,C.D., Olivos,J.M., Ramos,R.E., Chuquirachi,F.J., Ocana,V.R., Holguin,C.E., Cedano,L.E., Ampuero,J.S., Tinoco,Y.O., Graf,P.C.	2022-04-04 21:00:00	FPY01527/LOR-PER/2021	Dengue virus	Flavivirus	Flaviviridae	ssRNA(+)	10636	GenBank	partial	V	Peru	Peru		blood	2021-08-19	Dengue virus 1 isolate FPY01527/LOR-PER/2021 polyprotein (POLY) gene, complete cds; and sfRNA1 lncRNA gene, partial sequence
ON123594	Espejo,V.I., Troncos,G.M., Cruz,C.D., Olivos,J.M., Ramos,R.E., Chuquirachi,F.J., Ocana,V.R., Holguin,C.E., Cedano,L.E., Ampuero,J.S., Tinoco,Y.O., Graf,P.C.	2022-04-04 21:00:00	FPY01522/LOR-PER/2021	Dengue virus	Flavivirus	Flaviviridae	ssRNA(+)	10636	GenBank	partial	V	Peru	Peru		blood	2021-05-20	Dengue virus 1 isolate FPY01522/LOR-PER/2021 polyprotein (POLY) gene, complete cds; and sfRNA1 lncRNA gene, partial sequence
ON123593	Espejo,V.I., Troncos,G.M., Cruz,C.D., Olivos,J.M., Ramos,R.E., Chuquirachi,F.J., Ocana,V.R., Holguin,C.E., Cedano,L.E., Ampuero,J.S., Tinoco,Y.O., Graf,P.C.	2022-04-04 21:00:00	FPP04336/PIU-PER/2021	Dengue virus	Flavivirus	Flaviviridae	ssRNA(+)	10636	GenBank	partial	V	Peru	Peru		blood	2021-09-07	Dengue virus 1 isolate FPP04336/PIU-PER/2021 polyprotein (POLY) gene, complete cds; and sfRNA1 lncRNA gene, partial sequence
ON123592	Espejo,V.I., Troncos,G.M., Cruz,C.D., Olivos,J.M., Ramos,R.E., Chuquirachi,F.J., Ocana,V.R., Holguin,C.E., Cedano,L.E., Ampuero,J.S., Tinoco,Y.O., Graf,P.C.	2022-04-04 21:00:00	FPP04314/PIU-PER/2021	Dengue virus	Flavivirus	Flaviviridae	ssRNA(+)	10636	GenBank	partial	V	Peru	Peru		blood	2021-08-20	Dengue virus 1 isolate FPP04314/PIU-PER/2021 polyprotein (POLY) gene, complete cds; and sfRNA1 lncRNA gene, partial sequence
ON123591	Espejo,V.I., Troncos,G.M., Cruz,C.D., Olivos,J.M., Ramos,R.E., Chuquirachi,F.J., Ocana,V.R., Holguin,C.E., Cedano,L.E., Ampuero,J.S., Tinoco,Y.O., Graf,P.C.	2022-04-04 21:00:00	FPP04273/PIU-PER/2021	Dengue virus	Flavivirus	Flaviviridae	ssRNA(+)	10636	GenBank	partial	V	Peru	Peru		blood	2021-07-16	Dengue virus 1 isolate FPP04273/PIU-PER/2021 polyprotein (POLY) gene, complete cds; and sfRNA1 lncRNA gene, partial sequence
ON123590	Espejo,V.I., Troncos,G.M., Cruz,C.D., Olivos,J.M., Ramos,R.E., Chuquirachi,F.J., Ocana,V.R., Holguin,C.E., Cedano,L.E., Ampuero,J.S., Tinoco,Y.O., Graf,P.C.	2022-04-04 21:00:00	FPP04272/PIU-PER/2021	Dengue virus	Flavivirus	Flaviviridae	ssRNA(+)	10636	GenBank	partial	V	Peru	Peru		blood	2021-07-16	Dengue virus 1 isolate FPP04272/PIU-PER/2021 polyprotein (POLY) gene, complete cds; and sfRNA1 lncRNA gene, partial sequence
ON123589	Espejo,V.I., Troncos,G.M., Cruz,C.D., Olivos,J.M., Ramos,R.E., Chuquirachi,F.J., Ocana,V.R., Holguin,C.E., Cedano,L.E., Ampuero,J.S., Tinoco,Y.O., Graf,P.C.	2022-04-04 21:00:00	FPP04270/PIU-PER/2021	Dengue virus	Flavivirus	Flaviviridae	ssRNA(+)	10636	GenBank	partial	V	Peru	Peru		blood	2021-07-13	Dengue virus 1 isolate FPP04270/PIU-PER/2021 polyprotein (POLY) gene, complete cds; and sfRNA1 lncRNA gene, partial sequence
ON123588	Espejo,V.I., Troncos,G.M., Cruz,C.D., Olivos,J.M., Ramos,R.E., Chuquirachi,F.J., Ocana,V.R., Holguin,C.E., Cedano,L.E., Ampuero,J.S., Tinoco,Y.O., Graf,P.C.	2022-04-04 21:00:00	FPP04185/PIU-PER/2021	Dengue virus	Flavivirus	Flaviviridae	ssRNA(+)	10636	GenBank	partial	V	Peru	Peru		blood	2021-05-10	Dengue virus 1 isolate FPP04185/PIU-PER/2021 polyprotein (POLY) gene, complete cds; and sfRNA1 lncRNA gene, partial sequence
ON123587	Espejo,V.I., Troncos,G.M., Cruz,C.D., Olivos,J.M., Ramos,R.E., Chuquirachi,F.J., Ocana,V.R., Holguin,C.E., Cedano,L.E., Ampuero,J.S., Tinoco,Y.O., Graf,P.C.	2022-04-04 21:00:00	FPP04182/PIU-PER/2021	Dengue virus	Flavivirus	Flaviviridae	ssRNA(+)	10636	GenBank	partial	V	Peru	Peru		blood	2021-05-10	Dengue virus 1 isolate FPP04182/PIU-PER/2021 polyprotein (POLY) gene, complete cds; and sfRNA1 lncRNA gene, partial sequence
ON123586	Espejo,V.I., Troncos,G.M., Cruz,C.D., Olivos,J.M., Ramos,R.E., Chuquirachi,F.J., Ocana,V.R., Holguin,C.E., Cedano,L.E., Ampuero,J.S., Tinoco,Y.O., Graf,P.C.	2022-04-04 21:00:00	FPP04180/PIU-PER/2021	Dengue virus	Flavivirus	Flaviviridae	ssRNA(+)	10636	GenBank	partial	V	Peru	Peru		blood	2021-05-07	Dengue virus 1 isolate FPP04180/PIU-PER/2021 polyprotein (POLY) gene, complete cds; and sfRNA1 lncRNA gene, partial sequence
ON123585	Espejo,V.I., Troncos,G.M., Cruz,C.D., Olivos,J.M., Ramos,R.E., Chuquirachi,F.J., Ocana,V.R., Holguin,C.E., Cedano,L.E., Ampuero,J.S., Tinoco,Y.O., Graf,P.C.	2022-04-04 21:00:00	FPP04179/PIU-PER/2021	Dengue virus	Flavivirus	Flaviviridae	ssRNA(+)	10636	GenBank	partial	V	Peru	Peru		blood	2021-05-07	Dengue virus 1 isolate FPP04179/PIU-PER/2021 polyprotein (POLY) gene, complete cds; and sfRNA1 lncRNA gene, partial sequence
ON123584	Espejo,V.I., Troncos,G.M., Cruz,C.D., Olivos,J.M., Ramos,R.E., Chuquirachi,F.J., Ocana,V.R., Holguin,C.E., Cedano,L.E., Ampuero,J.S., Tinoco,Y.O., Graf,P.C.	2022-04-04 21:00:00	FPP04177/PIU-PER/2021	Dengue virus	Flavivirus	Flaviviridae	ssRNA(+)	10636	GenBank	partial	V	Peru	Peru		blood	2021-05-04	Dengue virus 1 isolate FPP04177/PIU-PER/2021 polyprotein (POLY) gene, complete cds; and sfRNA1 lncRNA gene, partial sequence
ON123583	Espejo,V.I., Troncos,G.M., Cruz,C.D., Olivos,J.M., Ramos,R.E., Chuquirachi,F.J., Ocana,V.R., Holguin,C.E., Cedano,L.E., Ampuero,J.S., Tinoco,Y.O., Graf,P.C.	2022-04-04 21:00:00	FPJ01586/JUN-PER/2021	Dengue virus	Flavivirus	Flaviviridae	ssRNA(+)	10636	GenBank	partial	V	Peru	Peru		blood	2021-08-11	Dengue virus 1 isolate FPJ01586/JUN-PER/2021 polyprotein (POLY) gene, complete cds; and sfRNA1 lncRNA gene, partial sequence
ON123582	Espejo,V.I., Troncos,G.M., Cruz,C.D., Olivos,J.M., Ramos,R.E., Chuquirachi,F.J., Ocana,V.R., Holguin,C.E., Cedano,L.E., Ampuero,J.S., Tinoco,Y.O., Graf,P.C.	2022-04-04 21:00:00	FPJ01584/JUN-PER/2021	Dengue virus	Flavivirus	Flaviviridae	ssRNA(+)	10636	GenBank	partial	V	Peru	Peru		blood	2021-07-23	Dengue virus 1 isolate FPJ01584/JUN-PER/2021 polyprotein (POLY) gene, complete cds; and sfRNA1 lncRNA gene, partial sequence
ON123581	Espejo,V.I., Troncos,G.M., Cruz,C.D., Olivos,J.M., Ramos,R.E., Chuquirachi,F.J., Ocana,V.R., Holguin,C.E., Cedano,L.E., Ampuero,J.S., Tinoco,Y.O., Graf,P.C.	2022-04-04 21:00:00	FPG00708/AMA-PER/2021	Dengue virus	Flavivirus	Flaviviridae	ssRNA(+)	10636	GenBank	partial	V	Peru	Peru		blood	2021-09-10	Dengue virus 1 isolate FPG00708/AMA-PER/2021 polyprotein (POLY) gene, complete cds; and sfRNA1 lncRNA gene, partial sequence
ON123580	Espejo,V.I., Troncos,G.M., Cruz,C.D., Olivos,J.M., Ramos,R.E., Chuquirachi,F.J., Ocana,V.R., Holguin,C.E., Cedano,L.E., Ampuero,J.S., Tinoco,Y.O., Graf,P.C.	2022-04-04 21:00:00	FPG00707/AMA-PER/2021	Dengue virus	Flavivirus	Flaviviridae	ssRNA(+)	10636	GenBank	partial	V	Peru	Peru		blood	2021-09-10	Dengue virus 1 isolate FPG00707/AMA-PER/2021 polyprotein (POLY) gene, complete cds; and sfRNA1 lncRNA gene, partial sequence
ON123579	Espejo,V.I., Troncos,G.M., Cruz,C.D., Olivos,J.M., Ramos,R.E., Chuquirachi,F.J., Ocana,V.R., Holguin,C.E., Cedano,L.E., Ampuero,J.S., Tinoco,Y.O., Graf,P.C.	2022-04-04 21:00:00	FPG00700/AMA-PER/2021	Dengue virus	Flavivirus	Flaviviridae	ssRNA(+)	10636	GenBank	partial	V	Peru	Peru		blood	2021-09-03	Dengue virus 1 isolate FPG00700/AMA-PER/2021 polyprotein (POLY) gene, complete cds; and sfRNA1 lncRNA gene, partial sequence
ON123578	Espejo,V.I., Troncos,G.M., Cruz,C.D., Olivos,J.M., Ramos,R.E., Chuquirachi,F.J., Ocana,V.R., Holguin,C.E., Cedano,L.E., Ampuero,J.S., Tinoco,Y.O., Graf,P.C.	2022-04-04 21:00:00	FPG00694/AMA-PER/2021	Dengue virus	Flavivirus	Flaviviridae	ssRNA(+)	10636	GenBank	partial	V	Peru	Peru		blood	2021-08-27	Dengue virus 1 isolate FPG00694/AMA-PER/2021 polyprotein (POLY) gene, complete cds; and sfRNA1 lncRNA gene, partial sequence
ON123577	Espejo,V.I., Troncos,G.M., Cruz,C.D., Olivos,J.M., Ramos,R.E., Chuquirachi,F.J., Ocana,V.R., Holguin,C.E., Cedano,L.E., Ampuero,J.S., Tinoco,Y.O., Graf,P.C.	2022-04-04 21:00:00	FPG00677/AMA-PER/2021	Dengue virus	Flavivirus	Flaviviridae	ssRNA(+)	10636	GenBank	partial	V	Peru	Peru		blood	2021-08-23	Dengue virus 1 isolate FPG00677/AMA-PER/2021 polyprotein (POLY) gene, complete cds; and sfRNA1 lncRNA gene, partial sequence
ON123576	Espejo,V.I., Troncos,G.M., Cruz,C.D., Olivos,J.M., Ramos,R.E., Chuquirachi,F.J., Ocana,V.R., Holguin,C.E., Cedano,L.E., Ampuero,J.S., Tinoco,Y.O., Graf,P.C.	2022-04-04 21:00:00	FPG00657/AMA-PER/2021	Dengue virus	Flavivirus	Flaviviridae	ssRNA(+)	10636	GenBank	partial	V	Peru	Peru		blood	2021-08-10	Dengue virus 1 isolate FPG00657/AMA-PER/2021 polyprotein (POLY) gene, complete cds; and sfRNA1 lncRNA gene, partial sequence
ON123575	Espejo,V.I., Troncos,G.M., Cruz,C.D., Olivos,J.M., Ramos,R.E., Chuquirachi,F.J., Ocana,V.R., Holguin,C.E., Cedano,L.E., Ampuero,J.S., Tinoco,Y.O., Graf,P.C.	2022-04-04 21:00:00	FPG00665/AMA-PER/2021	Dengue virus	Flavivirus	Flaviviridae	ssRNA(+)	10636	GenBank	partial	V	Peru	Peru		blood	2021-08-03	Dengue virus 1 isolate FPG00665/AMA-PER/2021 polyprotein (POLY) gene, complete cds; and sfRNA1 lncRNA gene, partial sequence
ON123574	Espejo,V.I., Troncos,G.M., Cruz,C.D., Olivos,J.M., Ramos,R.E., Chuquirachi,F.J., Ocana,V.R., Holguin,C.E., Cedano,L.E., Ampuero,J.S., Tinoco,Y.O., Graf,P.C.	2022-04-04 21:00:00	FPG00637/AMA-PER/2021	Dengue virus	Flavivirus	Flaviviridae	ssRNA(+)	10636	GenBank	partial	V	Peru	Peru		blood	2021-07-07	Dengue virus 1 isolate FPG00637/AMA-PER/2021 polyprotein (POLY) gene, complete cds; and sfRNA1 lncRNA gene, partial sequence
ON123573	Espejo,V.I., Troncos,G.M., Cruz,C.D., Olivos,J.M., Ramos,R.E., Chuquirachi,F.J., Ocana,V.R., Holguin,C.E., Cedano,L.E., Ampuero,J.S., Tinoco,Y.O., Graf,P.C.	2022-04-04 21:00:00	FPG00581/AMA-PER/2021	Dengue virus	Flavivirus	Flaviviridae	ssRNA(+)	10636	GenBank	partial	V	Peru	Peru		blood	2021-03-16	Dengue virus 1 isolate FPG00581/AMA-PER/2021 polyprotein (POLY) gene, complete cds; and sfRNA1 lncRNA gene, partial sequence
ON123572	Espejo,V.I., Troncos,G.M., Cruz,C.D., Olivos,J.M., Ramos,R.E., Chuquirachi,F.J., Ocana,V.R., Holguin,C.E., Cedano,L.E., Ampuero,J.S., Tinoco,Y.O., Graf,P.C.	2022-04-04 21:00:00	FPG00576/AMA-PER/2021	Dengue virus	Flavivirus	Flaviviridae	ssRNA(+)	10636	GenBank	partial	V	Peru	Peru		blood	2021-03-08	Dengue virus 1 isolate FPG00576/AMA-PER/2021 polyprotein (POLY) gene, complete cds; and sfRNA1 lncRNA gene, partial sequence
ON123571	Espejo,V.I., Troncos,G.M., Cruz,C.D., Olivos,J.M., Ramos,R.E., Chuquirachi,F.J., Ocana,V.R., Holguin,C.E., Cedano,L.E., Ampuero,J.S., Tinoco,Y.O., Graf,P.C.	2022-04-04 21:00:00	FPG00575/AMA-PER/2021	Dengue virus	Flavivirus	Flaviviridae	ssRNA(+)	10636	GenBank	partial	V	Peru	Peru		blood	2021-03-08	Dengue virus 1 isolate FPG00575/AMA-PER/2021 polyprotein (POLY) gene, complete cds; and sfRNA1 lncRNA gene, partial sequence
ON123570	Espejo,V.I., Troncos,G.M., Cruz,C.D., Olivos,J.M., Ramos,R.E., Chuquirachi,F.J., Ocana,V.R., Holguin,C.E., Cedano,L.E., Ampuero,J.S., Tinoco,Y.O., Graf,P.C.	2022-04-04 21:00:00	FPG00574/AMA-PER/2021	Dengue virus	Flavivirus	Flaviviridae	ssRNA(+)	10636	GenBank	partial	V	Peru	Peru		blood	2021-03-02	Dengue virus 1 isolate FPG00574/AMA-PER/2021 polyprotein (POLY) gene, complete cds; and sfRNA1 lncRNA gene, partial sequence
ON123569	Espejo,V.I., Troncos,G.M., Cruz,C.D., Olivos,J.M., Ramos,R.E., Chuquirachi,F.J., Ocana,V.R., Holguin,C.E., Cedano,L.E., Ampuero,J.S., Tinoco,Y.O., Graf,P.C.	2022-04-04 21:00:00	FPG00573/AMA-PER/2021	Dengue virus	Flavivirus	Flaviviridae	ssRNA(+)	10636	GenBank	partial	V	Peru	Peru		blood	2021-03-02	Dengue virus 1 isolate FPG00573/AMA-PER/2021 polyprotein (POLY) gene, complete cds; and sfRNA1 lncRNA gene, partial sequence
ON123568	Espejo,V.I., Troncos,G.M., Cruz,C.D., Olivos,J.M., Ramos,R.E., Chuquirachi,F.J., Ocana,V.R., Holguin,C.E., Cedano,L.E., Ampuero,J.S., Tinoco,Y.O., Graf,P.C.	2022-04-04 21:00:00	FPG00572/AMA-PER/2021	Dengue virus	Flavivirus	Flaviviridae	ssRNA(+)	10636	GenBank	partial	V	Peru	Peru		blood	2021-03-01	Dengue virus 1 isolate FPG00572/AMA-PER/2021 polyprotein (POLY) gene, complete cds; and sfRNA1 lncRNA gene, partial sequence
ON123567	Espejo,V.I., Troncos,G.M., Cruz,C.D., Olivos,J.M., Ramos,R.E., Chuquirachi,F.J., Ocana,V.R., Holguin,C.E., Cedano,L.E., Ampuero,J.S., Tinoco,Y.O., Graf,P.C.	2022-04-04 21:00:00	FPG00559/AMA-PER/2021	Dengue virus	Flavivirus	Flaviviridae	ssRNA(+)	10636	GenBank	partial	V	Peru	Peru		blood	2021-02-15	Dengue virus 1 isolate FPG00559/AMA-PER/2021 polyprotein (POLY) gene, complete cds; and sfRNA1 lncRNA gene, partial sequence
ON123566	Espejo,V.I., Troncos,G.M., Cruz,C.D., Olivos,J.M., Ramos,R.E., Chuquirachi,F.J., Ocana,V.R., Holguin,C.E., Cedano,L.E., Ampuero,J.S., Tinoco,Y.O., Graf,P.C.	2022-04-04 21:00:00	FPG00558/AMA-PER/2021	Dengue virus	Flavivirus	Flaviviridae	ssRNA(+)	10636	GenBank	partial	V	Peru	Peru		blood	2021-02-15	Dengue virus 1 isolate FPG00558/AMA-PER/2021 polyprotein (POLY) gene, complete cds; and sfRNA1 lncRNA gene, partial sequence
ON123565	Espejo,V.I., Troncos,G.M., Cruz,C.D., Olivos,J.M., Ramos,R.E., Chuquirachi,F.J., Ocana,V.R., Holguin,C.E., Cedano,L.E., Ampuero,J.S., Tinoco,Y.O., Graf,P.C.	2022-04-04 21:00:00	FPG00557/AMA-PER/2021	Dengue virus	Flavivirus	Flaviviridae	ssRNA(+)	10636	GenBank	partial	V	Peru	Peru		blood	2021-02-15	Dengue virus 1 isolate FPG00557/AMA-PER/2021 polyprotein (POLY) gene, complete cds; and sfRNA1 lncRNA gene, partial sequence
ON123564	Espejo,V.I., Troncos,G.M., Cruz,C.D., Olivos,J.M., Ramos,R.E., Chuquirachi,F.J., Ocana,V.R., Holguin,C.E., Cedano,L.E., Ampuero,J.S., Tinoco,Y.O., Graf,P.C.	2022-04-04 21:00:00	FPG00556/AMA-PER/2021	Dengue virus	Flavivirus	Flaviviridae	ssRNA(+)	10636	GenBank	partial	V	Peru	Peru		blood	2021-02-15	Dengue virus 1 isolate FPG00556/AMA-PER/2021 polyprotein (POLY) gene, complete cds; and sfRNA1 lncRNA gene, partial sequence
ON123563	Espejo,V.I., Troncos,G.M., Cruz,C.D., Olivos,J.M., Ramos,R.E., Chuquirachi,F.J., Ocana,V.R., Holguin,C.E., Cedano,L.E., Ampuero,J.S., Tinoco,Y.O., Graf,P.C.	2022-04-04 21:00:00	FPG00550/AMA-PER/2021	Dengue virus	Flavivirus	Flaviviridae	ssRNA(+)	10636	GenBank	partial	V	Peru	Peru		blood	2021-02-09	Dengue virus 1 isolate FPG00550/AMA-PER/2021 polyprotein (POLY) gene, complete cds; and sfRNA1 lncRNA gene, partial sequence
ON038491	Klungthong,C., Phonpakobsin,T., Thaisomboonsuk,B., Chinnawirotpisan,P., Manasatienkit,W., Ong-ajchaowlerd,P., Rodpradit,P., Nisalak,A., Kalayanarooj,S., Punpanich Vandepitt,W., Macareo,L.R., Gibbons,R.V., Jarman,R.G., Fernandez,S.	2022-03-26 21:00:00	00487/13	Dengue virus	Flavivirus	Flaviviridae	ssRNA(+)	10459	GenBank	partial	1	Thailand	Thailand	Homo sapiens		2013-04-14	Dengue virus 1 isolate 00487/13 polyprotein (POLY) gene, complete cds; and sfRNA1 lncRNA gene, partial sequence
ON038490	Klungthong,C., Phonpakobsin,T., Thaisomboonsuk,B., Chinnawirotpisan,P., Manasatienkit,W., Ong-ajchaowlerd,P., Rodpradit,P., Nisalak,A., Kalayanarooj,S., Punpanich Vandepitt,W., Macareo,L.R., Gibbons,R.V., Jarman,R.G., Fernandez,S.	2022-03-26 21:00:00	00910/12	Dengue virus	Flavivirus	Flaviviridae	ssRNA(+)	10459	GenBank	partial	1	Thailand	Thailand	Homo sapiens		2012-11-26	Dengue virus 1 isolate 00910/12 polyprotein (POLY) gene, complete cds; and sfRNA1 lncRNA gene, partial sequence
ON038489	Klungthong,C., Phonpakobsin,T., Thaisomboonsuk,B., Chinnawirotpisan,P., Manasatienkit,W., Ong-ajchaowlerd,P., Rodpradit,P., Nisalak,A., Kalayanarooj,S., Punpanich Vandepitt,W., Macareo,L.R., Gibbons,R.V., Jarman,R.G., Fernandez,S.	2022-03-26 21:00:00	00036/12	Dengue virus	Flavivirus	Flaviviridae	ssRNA(+)	10459	GenBank	partial	1	Thailand	Thailand	Homo sapiens		2012-01-26	Dengue virus 1 isolate 00036/12 polyprotein (POLY) gene, complete cds; and sfRNA1 lncRNA gene, partial sequence
ON038488	Klungthong,C., Phonpakobsin,T., Thaisomboonsuk,B., Chinnawirotpisan,P., Manasatienkit,W., Ong-ajchaowlerd,P., Rodpradit,P., Nisalak,A., Kalayanarooj,S., Punpanich Vandepitt,W., Macareo,L.R., Gibbons,R.V., Jarman,R.G., Fernandez,S.	2022-03-26 21:00:00	01153/11	Dengue virus	Flavivirus	Flaviviridae	ssRNA(+)	10459	GenBank	partial	1	Thailand	Thailand	Homo sapiens		2011-09-18	Dengue virus 1 isolate 01153/11 polyprotein (POLY) gene, complete cds; and sfRNA1 lncRNA gene, partial sequence
ON038487	Klungthong,C., Phonpakobsin,T., Thaisomboonsuk,B., Chinnawirotpisan,P., Manasatienkit,W., Ong-ajchaowlerd,P., Rodpradit,P., Nisalak,A., Kalayanarooj,S., Punpanich Vandepitt,W., Macareo,L.R., Gibbons,R.V., Jarman,R.G., Fernandez,S.	2022-03-26 21:00:00	00554/11	Dengue virus	Flavivirus	Flaviviridae	ssRNA(+)	10459	GenBank	partial	1	Thailand	Thailand	Homo sapiens		2011-06-09	Dengue virus 1 isolate 00554/11 polyprotein (POLY) gene, complete cds; and sfRNA1 lncRNA gene, partial sequence
ON038486	Klungthong,C., Phonpakobsin,T., Thaisomboonsuk,B., Chinnawirotpisan,P., Manasatienkit,W., Ong-ajchaowlerd,P., Rodpradit,P., Nisalak,A., Kalayanarooj,S., Punpanich Vandepitt,W., Macareo,L.R., Gibbons,R.V., Jarman,R.G., Fernandez,S.	2022-03-26 21:00:00	00433/11	Dengue virus	Flavivirus	Flaviviridae	ssRNA(+)	10459	GenBank	partial	1	Thailand	Thailand	Homo sapiens		2011-05-19	Dengue virus 1 isolate 00433/11 polyprotein (POLY) gene, complete cds; and sfRNA1 lncRNA gene, partial sequence
ON038485	Klungthong,C., Phonpakobsin,T., Thaisomboonsuk,B., Chinnawirotpisan,P., Manasatienkit,W., Ong-ajchaowlerd,P., Rodpradit,P., Nisalak,A., Kalayanarooj,S., Punpanich Vandepitt,W., Macareo,L.R., Gibbons,R.V., Jarman,R.G., Fernandez,S.	2022-03-26 21:00:00	01518/10	Dengue virus	Flavivirus	Flaviviridae	ssRNA(+)	10459	GenBank	partial	1	Thailand	Thailand	Homo sapiens		2010-11-12	Dengue virus 1 isolate 01518/10 polyprotein (POLY) gene, complete cds; and sfRNA1 lncRNA gene, partial sequence
ON038484	Klungthong,C., Phonpakobsin,T., Thaisomboonsuk,B., Chinnawirotpisan,P., Manasatienkit,W., Ong-ajchaowlerd,P., Rodpradit,P., Nisalak,A., Kalayanarooj,S., Punpanich Vandepitt,W., Macareo,L.R., Gibbons,R.V., Jarman,R.G., Fernandez,S.	2022-03-26 21:00:00	01498/09	Dengue virus	Flavivirus	Flaviviridae	ssRNA(+)	10459	GenBank	partial	1	Thailand	Thailand	Homo sapiens		2009-12-14	Dengue virus 1 isolate 01498/09 polyprotein (POLY) gene, complete cds; and sfRNA1 lncRNA gene, partial sequence
ON038483	Klungthong,C., Phonpakobsin,T., Thaisomboonsuk,B., Chinnawirotpisan,P., Manasatienkit,W., Ong-ajchaowlerd,P., Rodpradit,P., Nisalak,A., Kalayanarooj,S., Punpanich Vandepitt,W., Macareo,L.R., Gibbons,R.V., Jarman,R.G., Fernandez,S.	2022-03-26 21:00:00	00376/09	Dengue virus	Flavivirus	Flaviviridae	ssRNA(+)	10459	GenBank	partial	1	Thailand	Thailand	Homo sapiens		2009-05-13	Dengue virus 1 isolate 00376/09 polyprotein (POLY) gene, complete cds; and sfRNA1 lncRNA gene, partial sequence
ON038482	Klungthong,C., Phonpakobsin,T., Thaisomboonsuk,B., Chinnawirotpisan,P., Manasatienkit,W., Ong-ajchaowlerd,P., Rodpradit,P., Nisalak,A., Kalayanarooj,S., Punpanich Vandepitt,W., Macareo,L.R., Gibbons,R.V., Jarman,R.G., Fernandez,S.	2022-03-26 21:00:00	00148/05	Dengue virus	Flavivirus	Flaviviridae	ssRNA(+)	10459	GenBank	partial	1	Thailand	Thailand	Homo sapiens		2005-01-30	Dengue virus 1 isolate 00148/05 polyprotein (POLY) gene, complete cds; and sfRNA1 lncRNA gene, partial sequence
ON038481	Klungthong,C., Phonpakobsin,T., Thaisomboonsuk,B., Chinnawirotpisan,P., Manasatienkit,W., Ong-ajchaowlerd,P., Rodpradit,P., Nisalak,A., Kalayanarooj,S., Punpanich Vandepitt,W., Macareo,L.R., Gibbons,R.V., Jarman,R.G., Fernandez,S.	2022-03-26 21:00:00	01398/04	Dengue virus	Flavivirus	Flaviviridae	ssRNA(+)	10459	GenBank	partial	1	Thailand	Thailand	Homo sapiens		2004-11-03	Dengue virus 1 isolate 01398/04 polyprotein (POLY) gene, complete cds; and sfRNA1 lncRNA gene, partial sequence
ON038480	Klungthong,C., Phonpakobsin,T., Thaisomboonsuk,B., Chinnawirotpisan,P., Manasatienkit,W., Ong-ajchaowlerd,P., Rodpradit,P., Nisalak,A., Kalayanarooj,S., Punpanich Vandepitt,W., Macareo,L.R., Gibbons,R.V., Jarman,R.G., Fernandez,S.	2022-03-26 21:00:00	00440/04	Dengue virus	Flavivirus	Flaviviridae	ssRNA(+)	10459	GenBank	partial	1	Thailand	Thailand	Homo sapiens		2004-06-13	Dengue virus 1 isolate 00440/04 polyprotein (POLY) gene, complete cds; and sfRNA1 lncRNA gene, partial sequence
ON038479	Klungthong,C., Phonpakobsin,T., Thaisomboonsuk,B., Chinnawirotpisan,P., Manasatienkit,W., Ong-ajchaowlerd,P., Rodpradit,P., Nisalak,A., Kalayanarooj,S., Punpanich Vandepitt,W., Macareo,L.R., Gibbons,R.V., Jarman,R.G., Fernandez,S.	2022-03-26 21:00:00	01801/03	Dengue virus	Flavivirus	Flaviviridae	ssRNA(+)	10459	GenBank	partial	1	Thailand	Thailand	Homo sapiens		2003-09-28	Dengue virus 1 isolate 01801/03 polyprotein (POLY) gene, complete cds; and sfRNA1 lncRNA gene, partial sequence
ON038478	Klungthong,C., Phonpakobsin,T., Thaisomboonsuk,B., Chinnawirotpisan,P., Manasatienkit,W., Ong-ajchaowlerd,P., Rodpradit,P., Nisalak,A., Kalayanarooj,S., Punpanich Vandepitt,W., Macareo,L.R., Gibbons,R.V., Jarman,R.G., Fernandez,S.	2022-03-26 21:00:00	01023/03	Dengue virus	Flavivirus	Flaviviridae	ssRNA(+)	10459	GenBank	partial	1	Thailand	Thailand	Homo sapiens		2003-05-24	Dengue virus 1 isolate 01023/03 polyprotein (POLY) gene, complete cds; and sfRNA1 lncRNA gene, partial sequence
ON005141	Jones,A.R., Rutvisuttinunt,W., Chinnawirotpisan,P., Manasatienkit,W., Ongajchaowlerd,P., Ellison,D.W., Kalayanarooj,S., Suntarattiwong,P., Fernandez,S., Klungthong,C.	2022-03-21 21:00:00	00896/11	Dengue virus	Flavivirus	Flaviviridae	ssRNA(+)	10671	GenBank	partial		Thailand	Thailand	Homo sapiens		2011-07-23	Dengue virus 1 isolate 00896/11 polyprotein (POLY) gene, complete cds; and sfRNA1 lncRNA gene, partial sequence
OM909247	Leparc-Goffart,I., Grard,G., Durand,G.A., Piorkowski,G., Noel,H., de Lamballerie,X.	2022-05-31 21:00:00	54962	Dengue virus	Flavivirus	Flaviviridae	ssRNA(+)	10666	GenBank	partial		USA: Florida	USA	Homo sapiens	blood	2020-01-31	Dengue virus 1 isolate 54962 polyprotein (POLY) gene, complete cds; and sfRNA1 lncRNA gene, partial sequence
OM909246	Leparc-Goffart,I., Grard,G., Durand,G.A., Piorkowski,G., Noel,H., de Lamballerie,X.	2022-05-31 21:00:00	54960	Dengue virus	Flavivirus	Flaviviridae	ssRNA(+)	10666	GenBank	partial		USA: Florida	USA	Homo sapiens	blood	2020-01-31	Dengue virus 1 isolate 54960 polyprotein (POLY) gene, complete cds; and sfRNA1 lncRNA gene, partial sequence
OM833059	Santiago,G.A., Gonzalez-Morales,G., Charriez,K., Flores,B., Stanek,D., Morrison,A., Munoz-Jordan,J.L.	2022-03-01 21:00:00	US/DB291/2013	Dengue virus	Flavivirus	Flaviviridae	ssRNA(+)	10311	GenBank	partial		USA	USA	Homo sapiens	blood	2013-07-24	Dengue virus 1 isolate US/DB291/2013 polyprotein (POLY) gene, complete cds; and sfRNA1 lncRNA gene, partial sequence
OM833058	Santiago,G.A., Gonzalez-Morales,G., Charriez,K., Flores,B., Stanek,D., Morrison,A., Munoz-Jordan,J.L.	2022-03-01 21:00:00	US/DB290/2020	Dengue virus	Flavivirus	Flaviviridae	ssRNA(+)	10311	GenBank	partial		USA	USA	Aedes aegypti	pooled insects	2020-06-27	Dengue virus 1 isolate US/DB290/2020 polyprotein (POLY) gene, complete cds; and sfRNA1 lncRNA gene, partial sequence
OM833057	Santiago,G.A., Gonzalez-Morales,G., Charriez,K., Flores,B., Stanek,D., Morrison,A., Munoz-Jordan,J.L.	2022-03-01 21:00:00	US/DB289/2020	Dengue virus	Flavivirus	Flaviviridae	ssRNA(+)	10311	GenBank	partial		USA	USA	Aedes aegypti	pooled insects	2020-07-29	Dengue virus 1 isolate US/DB289/2020 polyprotein (POLY) gene, complete cds; and sfRNA1 lncRNA gene, partial sequence
OM833056	Santiago,G.A., Gonzalez-Morales,G., Charriez,K., Flores,B., Stanek,D., Morrison,A., Munoz-Jordan,J.L.	2022-03-01 21:00:00	US/DB288/2020	Dengue virus	Flavivirus	Flaviviridae	ssRNA(+)	10311	GenBank	partial		USA	USA	Aedes aegypti	pooled insects	2020-06-23	Dengue virus 1 isolate US/DB288/2020 polyprotein (POLY) gene, complete cds; and sfRNA1 lncRNA gene, partial sequence
OM833055	Santiago,G.A., Gonzalez-Morales,G., Charriez,K., Flores,B., Stanek,D., Morrison,A., Munoz-Jordan,J.L.	2022-03-01 21:00:00	US/DB287/2020	Dengue virus	Flavivirus	Flaviviridae	ssRNA(+)	10311	GenBank	partial		USA	USA	Homo sapiens	blood	2020-02-18	Dengue virus 1 isolate US/DB287/2020 polyprotein (POLY) gene, complete cds; and sfRNA1 lncRNA gene, partial sequence
OM666558	Yadav,P.D.	2022-02-18 21:00:00	MCL-21-H-11388_RNA_8504	Dengue virus	Flavivirus	Flaviviridae	ssRNA(+)	10723	GenBank	partial		India	India	Homo sapiens	blood	2021-11-16	Dengue virus 1 isolate MCL-21-H-11388_RNA_8504 polyprotein (POLY) gene, complete cds; and sfRNA1 lncRNA gene, partial sequence
OM666557	Yadav,P.D.	2022-02-18 21:00:00	MCL-21-H-11428_RNA_8514	Dengue virus	Flavivirus	Flaviviridae	ssRNA(+)	10706	GenBank	partial		India	India	Homo sapiens	blood	2021-11-16	Dengue virus 1 isolate MCL-21-H-11428_RNA_8514 polyprotein (POLY) gene, complete cds; and sfRNA1 lncRNA gene, partial sequence
OM654348	Rojas-Gallardo,D.M., Restrepo-Chica,J., Key,A., Acosta,A., Castrillon-Spitia,J.D., Tabares-Villa,F.A., Trujillo,A.M., JJimenez-Posada,E.V., Martinez-Gutierrez,M., Ruiz-Saenz,J., Waggoner,J., Collins,M.H., Piantadosi,A., Cardona-Ospina,J.A.	2022-02-15 21:00:00	AFI059	Dengue virus	Flavivirus	Flaviviridae	ssRNA(+)	10637	GenBank	partial		Colombia	Colombia	Homo sapiens	blood	2021-01-25	Dengue virus 1 isolate AFI059 polyprotein (POLY) gene, complete cds; and sfRNA1 lncRNA gene, partial sequence
OM654347	Rojas-Gallardo,D.M., Restrepo-Chica,J., Key,A., Acosta,A., Castrillon-Spitia,J.D., Tabares-Villa,F.A., Trujillo,A.M., JJimenez-Posada,E.V., Martinez-Gutierrez,M., Ruiz-Saenz,J., Waggoner,J., Collins,M.H., Piantadosi,A., Cardona-Ospina,J.A.	2022-02-15 21:00:00	AFI025	Dengue virus	Flavivirus	Flaviviridae	ssRNA(+)	10669	GenBank	partial		Colombia	Colombia	Homo sapiens	blood	2021-01-25	Dengue virus 1 isolate AFI025 polyprotein (POLY) gene, complete cds; and sfRNA1 lncRNA gene, partial sequence
OM349568	Su,W., Cao,Y., Lu,W.	2022-01-28 21:00:00	GZ19XN14467L_D1	Dengue virus	Flavivirus	Flaviviridae	ssRNA(+)	10347	GenBank	partial		China: Guangzhou	China	Homo sapiens		2019-06-13	Dengue virus 1 isolate GZ19XN14467L_D1 polyprotein (POLY) gene, complete cds; and sfRNA1 lncRNA gene, partial sequence
OM349567	Su,W., Cao,Y., Lu,W.	2022-01-28 21:00:00	GZ19XN12211L_D1	Dengue virus	Flavivirus	Flaviviridae	ssRNA(+)	10388	GenBank	partial		China: Guangzhou	China	Homo sapiens		2019-05-24	Dengue virus 1 isolate GZ19XN12211L_D1 polyprotein (POLY) gene, complete cds; and sfRNA1 lncRNA gene, partial sequence
OM281599	Wang,W.	2022-12-30 21:00:00	002/SH/2020	Dengue virus	Flavivirus	Flaviviridae	ssRNA(+)	10736	GenBank	complete		Philippines	Philippines	Homo sapiens	blood	2020-12-01	Dengue virus 1 isolate 002/SH/2020, complete genome
OM281598	Wang,W.	2022-12-30 21:00:00	144/SH/2019	Dengue virus	Flavivirus	Flaviviridae	ssRNA(+)	10735	GenBank	complete		Thailand	Thailand	Homo sapiens	blood	2019-12-01	Dengue virus 1 isolate 144/SH/2019, complete genome
OM281597	Wang,W.	2022-12-30 21:00:00	137/SH/2019	Dengue virus	Flavivirus	Flaviviridae	ssRNA(+)	10736	GenBank	complete		Philippines	Philippines	Homo sapiens	blood	2019-12-01	Dengue virus 1 isolate 137/SH/2019, complete genome
OM281596	Wang,W.	2022-12-30 21:00:00	132/SH/2019	Dengue virus	Flavivirus	Flaviviridae	ssRNA(+)	10735	GenBank	complete		Maldives	Maldives	Homo sapiens	blood	2019-12-01	Dengue virus 1 isolate 132/SH/2019, complete genome
OM281595	Wang,W.	2022-12-30 21:00:00	128/SH/2019	Dengue virus	Flavivirus	Flaviviridae	ssRNA(+)	10735	GenBank	complete		Viet Nam	Viet Nam	Homo sapiens	blood	2019-12-01	Dengue virus 1 isolate 128/SH/2019, complete genome
OM281594	Wang,W.	2022-12-30 21:00:00	123/SH/2019	Dengue virus	Flavivirus	Flaviviridae	ssRNA(+)	10735	GenBank	complete		China: Guangdong province	China	Homo sapiens	blood	2019-12-01	Dengue virus 1 isolate 123/SH/2019, complete genome
OM281593	Wang,W.	2022-12-30 21:00:00	098/SH/2019	Dengue virus	Flavivirus	Flaviviridae	ssRNA(+)	10735	GenBank	complete		Thailand	Thailand	Homo sapiens	blood	2019-12-01	Dengue virus 1 isolate 098/SH/2019, complete genome
OM281592	Wang,W.	2022-12-30 21:00:00	095/SH/2019	Dengue virus	Flavivirus	Flaviviridae	ssRNA(+)	10735	GenBank	complete		Cambodia	Cambodia	Homo sapiens	blood	2019-12-01	Dengue virus 1 isolate 095/SH/2019, complete genome
OM281591	Wang,W.	2022-12-30 21:00:00	094/SH/2019	Dengue virus	Flavivirus	Flaviviridae	ssRNA(+)	10735	GenBank	complete		Cambodia	Cambodia	Homo sapiens	blood	2019-12-01	Dengue virus 1 isolate 094/SH/2019, complete genome
OM281590	Wang,W.	2022-12-30 21:00:00	092/SH/2019	Dengue virus	Flavivirus	Flaviviridae	ssRNA(+)	10735	GenBank	complete		Cambodia	Cambodia	Homo sapiens	blood	2019-12-01	Dengue virus 1 isolate 092/SH/2019, complete genome
OM281589	Wang,W.	2022-12-30 21:00:00	090/SH/2019	Dengue virus	Flavivirus	Flaviviridae	ssRNA(+)	10735	GenBank	complete		Philippines	Philippines	Homo sapiens	blood	2019-12-01	Dengue virus 1 isolate 090/SH/2019, complete genome
OM281588	Wang,W.	2022-12-30 21:00:00	074/SH/2019	Dengue virus	Flavivirus	Flaviviridae	ssRNA(+)	10735	GenBank	complete		Cambodia	Cambodia	Homo sapiens	blood	2019-12-01	Dengue virus 1 isolate 074/SH/2019, complete genome
OM281587	Wang,W.	2022-12-30 21:00:00	073/SH/2019	Dengue virus	Flavivirus	Flaviviridae	ssRNA(+)	10735	GenBank	complete		Cambodia	Cambodia	Homo sapiens	blood	2019-12-01	Dengue virus 1 isolate 073/SH/2019, complete genome
OM281586	Wang,W.	2022-12-30 21:00:00	068/SH/2019	Dengue virus	Flavivirus	Flaviviridae	ssRNA(+)	10735	GenBank	complete		Thailand	Thailand	Homo sapiens	blood	2019-12-01	Dengue virus 1 isolate 068/SH/2019, complete genome
OM281585	Wang,W.	2022-12-30 21:00:00	067/SH/2019	Dengue virus	Flavivirus	Flaviviridae	ssRNA(+)	10735	GenBank	complete		Thailand	Thailand	Homo sapiens	blood	2019-12-01	Dengue virus 1 isolate 067/SH/2019, complete genome
OM281584	Wang,W.	2022-12-30 21:00:00	057/SH/2019	Dengue virus	Flavivirus	Flaviviridae	ssRNA(+)	10735	GenBank	complete		Cambodia	Cambodia	Homo sapiens	blood	2019-12-01	Dengue virus 1 isolate 057/SH/2019, complete genome
OM281583	Wang,W.	2022-12-30 21:00:00	055/SH/2019	Dengue virus	Flavivirus	Flaviviridae	ssRNA(+)	10735	GenBank	complete		Cambodia	Cambodia	Homo sapiens	blood	2019-12-01	Dengue virus 1 isolate 055/SH/2019, complete genome
OM281582	Wang,W.	2022-12-30 21:00:00	053/SH/2019	Dengue virus	Flavivirus	Flaviviridae	ssRNA(+)	10735	GenBank	complete		Cambodia	Cambodia	Homo sapiens	blood	2019-12-01	Dengue virus 1 isolate 053/SH/2019, complete genome
OM281581	Wang,W.	2022-12-30 21:00:00	049/SH/2019	Dengue virus	Flavivirus	Flaviviridae	ssRNA(+)	10735	GenBank	complete		Cambodia	Cambodia	Homo sapiens	blood	2019-12-01	Dengue virus 1 isolate 049/SH/2019, complete genome
OM281580	Wang,W.	2022-12-30 21:00:00	046/SH/2019	Dengue virus	Flavivirus	Flaviviridae	ssRNA(+)	10735	GenBank	complete		Cambodia	Cambodia	Homo sapiens	blood	2019-12-01	Dengue virus 1 isolate 046/SH/2019, complete genome
OM281579	Wang,W.	2022-12-30 21:00:00	030/SH/2019	Dengue virus	Flavivirus	Flaviviridae	ssRNA(+)	10735	GenBank	complete		Cambodia	Cambodia	Homo sapiens	blood	2019-12-01	Dengue virus 1 isolate 030/SH/2019, complete genome
OM281578	Wang,W.	2022-12-30 21:00:00	025/SH/2019	Dengue virus	Flavivirus	Flaviviridae	ssRNA(+)	10735	GenBank	complete		Cambodia	Cambodia	Homo sapiens	blood	2019-12-01	Dengue virus 1 isolate 025/SH/2019, complete genome
OM281577	Wang,W.	2022-12-30 21:00:00	024/SH/2019	Dengue virus	Flavivirus	Flaviviridae	ssRNA(+)	10735	GenBank	complete		Cambodia	Cambodia	Homo sapiens	blood	2019-12-01	Dengue virus 1 isolate 024/SH/2019, complete genome
OM281576	Wang,W.	2022-12-30 21:00:00	023/SH/2019	Dengue virus	Flavivirus	Flaviviridae	ssRNA(+)	10735	GenBank	complete		Cambodia	Cambodia	Homo sapiens	blood	2019-12-01	Dengue virus 1 isolate 023/SH/2019, complete genome
OM281575	Wang,W.	2022-12-30 21:00:00	022/SH/2019	Dengue virus	Flavivirus	Flaviviridae	ssRNA(+)	10735	GenBank	complete		Cambodia	Cambodia	Homo sapiens	blood	2019-12-01	Dengue virus 1 isolate 022/SH/2019, complete genome
OM281574	Wang,W.	2022-12-30 21:00:00	066/SH/2018	Dengue virus	Flavivirus	Flaviviridae	ssRNA(+)	10735	GenBank	complete		Cambodia	Cambodia	Homo sapiens	blood	2018-12-01	Dengue virus 1 isolate 066/SH/2018, complete genome
OM281573	Wang,W.	2022-12-30 21:00:00	045/SH/2018	Dengue virus	Flavivirus	Flaviviridae	ssRNA(+)	10734	GenBank	complete		China: Shanghai	China	Homo sapiens	blood	2018-12-01	Dengue virus 1 isolate 045/SH/2018, complete genome
OM281572	Wang,W.	2022-12-30 21:00:00	043/SH/2018	Dengue virus	Flavivirus	Flaviviridae	ssRNA(+)	10735	GenBank	complete		Thailand	Thailand	Homo sapiens	blood	2018-12-01	Dengue virus 1 isolate 043/SH/2018, complete genome
OM281571	Wang,W.	2022-12-30 21:00:00	042/SH/2018	Dengue virus	Flavivirus	Flaviviridae	ssRNA(+)	10734	GenBank	complete		China: Shanghai	China	Homo sapiens	blood	2018-12-01	Dengue virus 1 isolate 042/SH/2018, complete genome
OM281570	Wang,W.	2022-12-30 21:00:00	038/SH/2018	Dengue virus	Flavivirus	Flaviviridae	ssRNA(+)	10735	GenBank	complete		China: Shanghai	China	Homo sapiens	blood	2018-12-01	Dengue virus 1 isolate 038/SH/2018, complete genome
OM281569	Wang,W.	2022-12-30 21:00:00	037/SH/2018	Dengue virus	Flavivirus	Flaviviridae	ssRNA(+)	10735	GenBank	complete		Cambodia	Cambodia	Homo sapiens	blood	2018-12-01	Dengue virus 1 isolate 037/SH/2018, complete genome
OM033409	Chea,S., Lay,S., Oum,M., Bohl,J.A., Yek,C., Manning,J.E.	2021-12-31 21:00:00	109-0129_L001	Dengue virus	Flavivirus	Flaviviridae	ssRNA(+)	10677	GenBank	partial		Cambodia	Cambodia	Homo sapiens	blood	2019-09-01	Dengue virus type I isolate 109-0129_L001 polyprotein (POLY) gene, complete cds; and sfRNA1 lncRNA gene, partial sequence
OL452067	Tamura,T., Zhang,J., Madan,V., Biswas,A., Schwoerer,M.P., Cafiero,T.R., Heller,B.L., Wang,W., Ploss,A.	2022-01-03 21:00:00	DENV1-5_RIO_H_36589	Dengue virus	Flavivirus	Flaviviridae	ssRNA(+)	10705	GenBank	complete		Angola	Angola	Homo sapiens	blood	1988-01-01	Dengue virus type I isolate DENV1-5_RIO_H_36589, complete genome
OL412703	Bohl,J.A., Manning,J.E., Lay,S., Chea,S., Brooks,C., Ahyong,V.	2021-11-12 21:00:00	109_060	Dengue virus	Flavivirus	Flaviviridae	ssRNA(+)	10680	GenBank	partial		Cambodia	Cambodia	Homo sapiens	blood	2019-07-01	Dengue virus type I isolate 109_060 polyprotein (POLY) gene, complete cds; and sfRNA1 lncRNA gene, partial sequence
OL412678	Bohl,J.A., Manning,J.E., Lay,S., Chea,S., Brooks,C., Ahyong,V.	2021-11-12 21:00:00	DENV1 011	Dengue virus	Flavivirus	Flaviviridae	ssRNA(+)	10685	GenBank	partial		Cambodia	Cambodia	Homo sapiens	blood	2019-07-01	Dengue virus type I isolate DENV1 011 polyprotein (POLY) gene, complete cds; and sfRNA1 lncRNA gene, partial sequence
OL412140	Bohl,J.A., Manning,J.E., Lay,S., Chea,S., Brooks,C., Ahyong,V.	2021-11-12 21:00:00	622	Dengue virus	Flavivirus	Flaviviridae	ssRNA(+)	10690	GenBank	partial		Cambodia	Cambodia	Homo sapiens	blood	2019-08-01	Dengue virus type I isolate 622 polyprotein (POLY) gene, complete cds; and sfRNA1 lncRNA gene, partial sequence
OL411499	Lay,S., Manning,J.E., Bohl,J.A., Chea,S., Brooks,C., Ahyong,V.	2021-11-12 21:00:00	100-0610_2019-07-01	Dengue virus	Flavivirus	Flaviviridae	ssRNA(+)	10680	GenBank	partial		Cambodia	Cambodia	Homo sapiens	blood	2019-07-01	Dengue virus type I isolate 100-0610_2019-07-01 polyprotein (POLY) gene, complete cds; and sfRNA1 lncRNA gene, partial sequence
OL411498	Lay,S., Manning,J.E., Bohl,J.A., Chea,S., Brooks,C., Ahyong,V.	2021-11-12 21:00:00	109-0067_2019-08-13	Dengue virus	Flavivirus	Flaviviridae	ssRNA(+)	10622	GenBank	partial		Cambodia	Cambodia	Homo sapiens	blood	2019-08-01	Dengue virus type I isolate 109-0067_2019-08-13 polyprotein (POLY) gene, complete cds; and sfRNA1 lncRNA gene, partial sequence
OL411497	Lay,S., Manning,J.E., Bohl,J.A., Chea,S., Brooks,C., Ahyong,V.	2021-11-12 21:00:00	109-0245_2020-03-04	Dengue virus	Flavivirus	Flaviviridae	ssRNA(+)	10700	GenBank	partial		Cambodia	Cambodia	Homo sapiens	blood	2020-03-01	Dengue virus type I isolate 109-0245_2020-03-04 polyprotein (POLY) gene, complete cds; and sfRNA1 lncRNA gene, partial sequence
OL411496	Lay,S., Manning,J.E., Bohl,J.A., Chea,S., Brooks,C., Ahyong,V.	2021-11-12 21:00:00	100-0642_2019-07-02	Dengue virus	Flavivirus	Flaviviridae	ssRNA(+)	10687	GenBank	partial		Cambodia	Cambodia	Homo sapiens	blood	2019-07-01	Dengue virus type I isolate 100-0642_2019-07-02 polyprotein (POLY) gene, complete cds; and sfRNA1 lncRNA gene, partial sequence
OL411495	Lay,S., Manning,J.E., Bohl,J.A., Chea,S., Brooks,C., Ahyong,V.	2021-11-12 21:00:00	109-0316_2020-07-13	Dengue virus	Flavivirus	Flaviviridae	ssRNA(+)	10682	GenBank	partial		Cambodia	Cambodia	Homo sapiens	blood	2020-07-01	Dengue virus type I isolate 109-0316_2020-07-13 polyprotein (POLY) gene, complete cds; and sfRNA1 lncRNA gene, partial sequence
OL321181	Jonduo,M., Neave,M.J., Javati,S., Abala,D., Bilo,E., Kini,A., Kumbu,J., Laman,M., Robinson,L.J., Makita,L., Susapu,M., Pomat,W., Abdad,M.Y., Williams,D.T., Horwood,P.F., Robinson,L., Williams,D.	2022-07-31 21:00:00	Kiunga045	Dengue virus	Flavivirus	Flaviviridae	ssRNA(+)	10400	GenBank	partial		Papua New Guinea: Western Province, St Gabriel	Papua New Guinea	Homo sapiens	blood	2016-02-08	Dengue virus 1 isolate Kiunga045 polyprotein (POLY) gene, complete cds; and sfRNA1 lncRNA gene, partial sequence
OL321180	Jonduo,M., Neave,M.J., Javati,S., Abala,D., Bilo,E., Kini,A., Kumbu,J., Laman,M., Robinson,L.J., Makita,L., Susapu,M., Pomat,W., Abdad,M.Y., Williams,D.T., Horwood,P.F., Robinson,L., Williams,D.	2022-07-31 21:00:00	Kiunga049	Dengue virus	Flavivirus	Flaviviridae	ssRNA(+)	10464	GenBank	partial		Papua New Guinea: Western Province, Kiunga	Papua New Guinea	Homo sapiens	blood	2016-02-08	Dengue virus 1 isolate Kiunga049 polyprotein (POLY) gene, complete cds; and sfRNA1 lncRNA gene, partial sequence
OL321179	Jonduo,M., Neave,M.J., Javati,S., Abala,D., Bilo,E., Kini,A., Kumbu,J., Laman,M., Robinson,L.J., Makita,L., Susapu,M., Pomat,W., Abdad,M.Y., Williams,D.T., Horwood,P.F., Robinson,L., Williams,D.	2022-07-31 21:00:00	Kiunga056	Dengue virus	Flavivirus	Flaviviridae	ssRNA(+)	10247	GenBank	partial		Papua New Guinea: Western Province, Tupensome	Papua New Guinea	Homo sapiens	blood	2016-02-02	Dengue virus 1 isolate Kiunga056 polyprotein (POLY) gene, partial cds; and sfRNA1 lncRNA gene, partial sequence
OK605756	Tamura,T., Zhang,J., Madan,V., Biswas,A., Schwoerer,M.P., Cafiero,T.R., Heller,B.L., Wang,W., Ploss,A.	2022-01-03 21:00:00	DENV1-4_FSE_2133	Dengue virus	Flavivirus	Flaviviridae	ssRNA(+)	10735	GenBank	complete		Ecuador	Ecuador	Homo sapiens	blood	2007-01-01	Dengue virus type I isolate DENV1-4_FSE_2133, complete genome
OK605755	Tamura,T., Zhang,J., Madan,V., Biswas,A., Schwoerer,M.P., Cafiero,T.R., Heller,B.L., Wang,W., Ploss,A.	2022-01-03 21:00:00	DENV1-3_C_0268-96	Dengue virus	Flavivirus	Flaviviridae	ssRNA(+)	10735	GenBank	complete		Thailand	Thailand	Homo sapiens	blood	1996-01-01	Dengue virus type I isolate DENV1-3_C_0268-96, complete genome
OK605754	Tamura,T., Zhang,J., Madan,V., Biswas,A., Schwoerer,M.P., Cafiero,T.R., Heller,B.L., Wang,W., Ploss,A.	2022-01-03 21:00:00	DENV1-2_BE_H_584526	Dengue virus	Flavivirus	Flaviviridae	ssRNA(+)	10735	GenBank	complete		Brazil	Brazil	Homo sapiens	blood	1997-01-01	Dengue virus type I isolate DENV1-2_BE_H_584526, complete genome
OK605753	Tamura,T., Zhang,J., Madan,V., Biswas,A., Schwoerer,M.P., Cafiero,T.R., Heller,B.L., Wang,W., Ploss,A.	2022-01-03 21:00:00	DENV1-1_AUS_H_T1_9	Dengue virus	Flavivirus	Flaviviridae	ssRNA(+)	10735	GenBank	complete		Australia	Australia	Homo sapiens	blood	1983-01-01	Dengue virus type I isolate DENV1-1_AUS_H_T1_9, complete genome
OK562744	Chen,Y.	2021-10-24 21:00:00	guangzhou2019-1	Dengue virus	Flavivirus	Flaviviridae	ssRNA(+)	10731	GenBank	partial		China	China	Homo sapiens	blood	2019-09-26	Dengue virus type I isolate guangzhou2019-1 polyprotein (POLY) gene, complete cds; and sfRNA1 lncRNA gene, complete sequence
OK562731	Chen,Y.	2021-10-24 21:00:00	guangzhou2014-1	Dengue virus	Flavivirus	Flaviviridae	ssRNA(+)	10581	GenBank	partial		China	China	Homo sapiens	blood	2014-09-26	Dengue virus type I isolate guangzhou2014-1 polyprotein (POLY) gene, complete cds; and sfRNA1 lncRNA gene, partial sequence
OK562728	Chen,Y., ren,R., Chen,R., Li,C., Liu,J.	2021-10-24 21:00:00	guangzhou2019-3	Dengue virus	Flavivirus	Flaviviridae	ssRNA(+)	10739	GenBank	complete		China	China	Homo sapiens	blood	2019-09-26	Dengue virus type I isolate guangzhou2019-3, complete genome
OK534154	Chen,Y.	2021-10-19 21:00:00	guangzhou2019-2	Dengue virus	Flavivirus	Flaviviridae	ssRNA(+)	10734	GenBank	partial		China	China	Homo sapiens	blood	2019-09-26	Dengue virus type I isolate guangzhou2019-2 polyprotein (POLY) gene, complete cds; and sfRNA1 lncRNA gene, complete sequence
OK469344	Stica,C., Barrero,R.A., Murray,R.Z., Devine,G.J., Phillips,M.J., Frentiu,F.D.	2022-02-27 21:00:00	Dengue 1 S-30150 Fiji 1975	Dengue virus	Flavivirus	Flaviviridae	ssRNA(+)	10690	GenBank	partial	1	Fiji	Fiji	Homo sapiens	blood	1975-01-01	Dengue virus 1 isolate Dengue 1 S-30150 Fiji 1975 polyprotein (POLY) gene, complete cds; and sfRNA1 lncRNA gene, partial sequence
OK469343	Stica,C., Barrero,R.A., Murray,R.Z., Devine,G.J., Phillips,M.J., Frentiu,F.D.	2022-02-27 21:00:00	PAK4 25.7.02	Dengue virus	Flavivirus	Flaviviridae	ssRNA(+)	10691	GenBank	partial	1	Pakistan	Pakistan	Homo sapiens	blood	1994-01-01	Dengue virus 1 isolate PAK4 25.7.02 polyprotein (POLY) gene, complete cds; and sfRNA1 lncRNA gene, partial sequence
OK469342	Stica,C., Barrero,R.A., Murray,R.Z., Devine,G.J., Phillips,M.J., Frentiu,F.D.	2022-02-27 21:00:00	12030 1997 6.7.06	Dengue virus	Flavivirus	Flaviviridae	ssRNA(+)	10690	GenBank	partial	1	Malaysia	Malaysia	Homo sapiens	blood	1997-01-01	Dengue virus 1 isolate 12030 1997 6.7.06 polyprotein (POLY) gene, complete cds; and sfRNA1 lncRNA gene, partial sequence
OK469341	Stica,C., Barrero,R.A., Murray,R.Z., Devine,G.J., Phillips,M.J., Frentiu,F.D.	2022-02-27 21:00:00	8196/92 DEN1	Dengue virus	Flavivirus	Flaviviridae	ssRNA(+)	10690	GenBank	partial	1	Singapore	Singapore	Homo sapiens	blood	1992-01-01	Dengue virus 1 isolate 8196/92 DEN1 polyprotein (POLY) gene, complete cds; and sfRNA1 lncRNA gene, partial sequence
OK448162	Liu,Q., Gong,Z., Zhao,T.	2021-12-13 21:00:00	10735	Dengue virus	Flavivirus	Flaviviridae	ssRNA(+)	10738	GenBank	complete		China: Zhejiang Whenzhou	China	Aedes albopictus		2019-09-01	Dengue virus type I isolate 10735, complete genome
OK159976	Bohl,J.A., Manning,J.E., Lay,S., Chea,S., Brooks,C., Ahyong,V.	2021-09-20 21:00:00	RR031_014_SERa_30965_reads_nh	Dengue virus	Flavivirus	Flaviviridae	ssRNA(+)	10179	GenBank	partial		Cambodia	Cambodia	Homo sapiens	blood	2019-07-01	Dengue virus type I isolate RR031_014_SERa_30965_reads_nh polyprotein (POLY) gene, complete cds
OK159975	Bohl,J.A., Manning,J.E., Lay,S., Chea,S., Brooks,C., Ahyong,V.	2021-09-20 21:00:00	RR031_022_SERa_30973_reads_nh	Dengue virus	Flavivirus	Flaviviridae	ssRNA(+)	10698	GenBank	partial		Cambodia	Cambodia	Homo sapiens	blood	2019-07-01	Dengue virus type I isolate RR031_022_SERa_30973_reads_nh polyprotein (POLY) gene, complete cds; and sfRNA1 lncRNA gene, partial sequence
OK159974	Bohl,J.A., Manning,J.E., Lay,S., Chea,S., Brooks,C., Ahyong,V.	2021-09-20 21:00:00	RR031_034_SERa_30985_reads_nh	Dengue virus	Flavivirus	Flaviviridae	ssRNA(+)	10179	GenBank	partial		Cambodia	Cambodia	Homo sapiens	blood	2019-08-01	Dengue virus type I isolate RR031_034_SERa_30985_reads_nh polyprotein (POLY) gene, complete cds
OK159973	Bohl,J.A., Manning,J.E., Lay,S., Chea,S., Brooks,C., Ahyong,V.	2021-09-20 21:00:00	RR031_055_SERa_31006_reads_nh	Dengue virus	Flavivirus	Flaviviridae	ssRNA(+)	10648	GenBank	partial		Cambodia	Cambodia	Homo sapiens	blood	2019-08-01	Dengue virus type I isolate RR031_055_SERa_31006_reads_nh polyprotein (POLY) gene, complete cds; and sfRNA1 lncRNA gene, partial sequence
OK159972	Bohl,J.A., Manning,J.E., Lay,S., Chea,S., Brooks,C., Ahyong,V.	2021-09-20 21:00:00	RR031_080_SERa_31030_reads_nh	Dengue virus	Flavivirus	Flaviviridae	ssRNA(+)	10641	GenBank	partial		Cambodia	Cambodia	Homo sapiens	blood	2019-08-01	Dengue virus type I isolate RR031_080_SERa_31030_reads_nh polyprotein (POLY) gene, complete cds; and sfRNA1 lncRNA gene, partial sequence
OK159971	Bohl,J.A., Manning,J.E., Lay,S., Chea,S., Brooks,C., Ahyong,V.	2021-09-20 21:00:00	RR031_081_SERa_31031_reads_nh	Dengue virus	Flavivirus	Flaviviridae	ssRNA(+)	10647	GenBank	partial		Cambodia	Cambodia	Homo sapiens	blood	2019-08-01	Dengue virus type I isolate RR031_081_SERa_31031_reads_nh polyprotein (POLY) gene, complete cds; and sfRNA1 lncRNA gene, partial sequence
OK159970	Bohl,J.A., Manning,J.E., Lay,S., Chea,S., Brooks,C., Ahyong,V.	2021-09-20 21:00:00	RR031_086_SERa_31036_reads_nh	Dengue virus	Flavivirus	Flaviviridae	ssRNA(+)	10179	GenBank	partial		Cambodia	Cambodia	Homo sapiens	blood	2019-08-01	Dengue virus type I isolate RR031_086_SERa_31036_reads_nh polyprotein (POLY) gene, complete cds
OK159969	Bohl,J.A., Manning,J.E., Lay,S., Chea,S., Brooks,C., Ahyong,V.	2021-09-20 21:00:00	RR031_105_SERa_31055_reads_nh	Dengue virus	Flavivirus	Flaviviridae	ssRNA(+)	10647	GenBank	partial		Cambodia	Cambodia	Homo sapiens	blood	2019-07-01	Dengue virus 1 isolate RR031_105_SERa_31055_reads_nh polyprotein (POLY) gene, complete cds; and sfRNA1 lncRNA gene, partial sequence
OK159968	Bohl,J.A., Manning,J.E., Lay,S., Chea,S., Brooks,C., Ahyong,V.	2021-09-20 21:00:00	RR031_110_SERa_31060_reads_nh	Dengue virus	Flavivirus	Flaviviridae	ssRNA(+)	10686	GenBank	partial		Cambodia	Cambodia	Homo sapiens	blood	2019-03-01	Dengue virus 1 isolate RR031_110_SERa_31060_reads_nh polyprotein (POLY) gene, complete cds; and sfRNA1 lncRNA gene, partial sequence
OK159967	Bohl,J.A., Manning,J.E., Lay,S., Chea,S., Brooks,C., Ahyong,V.	2021-09-20 21:00:00	RR031_127_SERa_31077_reads_nh	Dengue virus	Flavivirus	Flaviviridae	ssRNA(+)	10641	GenBank	partial		Cambodia	Cambodia	Homo sapiens	blood	2019-07-01	Dengue virus type I isolate RR031_127_SERa_31077_reads_nh polyprotein (POLY) gene, complete cds; and sfRNA1 lncRNA gene, partial sequence
OK159966	Bohl,J.A., Manning,J.E., Lay,S., Chea,S., Brooks,C., Ahyong,V.	2021-09-20 21:00:00	RR031_144_SERa_31087_reads_nh	Dengue virus	Flavivirus	Flaviviridae	ssRNA(+)	10641	GenBank	partial		Cambodia	Cambodia	Homo sapiens	blood	2019-07-01	Dengue virus type I isolate RR031_144_SERa_31087_reads_nh polyprotein (POLY) gene, complete cds; and sfRNA1 lncRNA gene, partial sequence
OK159965	Bohl,J.A., Manning,J.E., Lay,S., Chea,S., Brooks,C., Ahyong,V.	2021-09-20 21:00:00	RR031_158_SERa_31102_reads_nh	Dengue virus	Flavivirus	Flaviviridae	ssRNA(+)	10698	GenBank	partial		Cambodia	Cambodia	Homo sapiens	blood	2019-06-01	Dengue virus type I isolate RR031_158_SERa_31102_reads_nh polyprotein (POLY) gene, complete cds; and sfRNA1 lncRNA gene, partial sequence
OK159964	Bohl,J.A., Manning,J.E., Lay,S., Chea,S., Brooks,C., Ahyong,V.	2021-09-20 21:00:00	RR031_163_SERa_31107_reads_nh	Dengue virus	Flavivirus	Flaviviridae	ssRNA(+)	10179	GenBank	partial		Cambodia	Cambodia	Homo sapiens	blood	2019-08-01	Dengue virus type I isolate RR031_163_SERa_31107_reads_nh polyprotein (POLY) gene, complete cds
OK159963	Bohl,J.A., Manning,J.E., Lay,S., Chea,S., Brooks,C., Ahyong,V.	2021-09-20 21:00:00	RR031_167_SERa_31111_reads_nh	Dengue virus	Flavivirus	Flaviviridae	ssRNA(+)	10646	GenBank	partial		Cambodia	Cambodia	Homo sapiens	blood	2019-07-01	Dengue virus type I isolate RR031_167_SERa_31111_reads_nh polyprotein (POLY) gene, complete cds; and sfRNA1 lncRNA gene, partial sequence
OK159962	Bohl,J.A., Manning,J.E., Lay,S., Chea,S., Brooks,C., Ahyong,V.	2021-09-20 21:00:00	RR031_267_SERa_31136_reads_nh	Dengue virus	Flavivirus	Flaviviridae	ssRNA(+)	10698	GenBank	partial		Cambodia	Cambodia	Homo sapiens	blood	2019-08-01	Dengue virus type I isolate RR031_267_SERa_31136_reads_nh polyprotein (POLY) gene, complete cds; and sfRNA1 lncRNA gene, partial sequence
OK159961	Bohl,J.A., Manning,J.E., Lay,S., Chea,S., Brooks,C., Ahyong,V.	2021-09-20 21:00:00	109-0230_L001_56781_reads_nh	Dengue virus	Flavivirus	Flaviviridae	ssRNA(+)	10646	GenBank	partial		Cambodia	Cambodia	Homo sapiens	blood	2020-02-01	Dengue virus type I isolate 109-0230_L001_56781_reads_nh polyprotein (POLY) gene, complete cds; and sfRNA1 lncRNA gene, partial sequence
OK159960	Bohl,J.A., Manning,J.E., Lay,S., Chea,S., Brooks,C., Ahyong,V.	2021-09-20 21:00:00	109-0236_L001_56782_reads_nh	Dengue virus	Flavivirus	Flaviviridae	ssRNA(+)	10641	GenBank	partial		Cambodia	Cambodia	Homo sapiens	blood	2020-02-01	Dengue virus type I isolate 109-0236_L001_56782_reads_nh polyprotein (POLY) gene, complete cds; and sfRNA1 lncRNA gene, partial sequence
OK159959	Bohl,J.A., Manning,J.E., Lay,S., Chea,S., Brooks,C., Ahyong,V.	2021-09-20 21:00:00	RR031_002_SERa_30953_reads_nh	Dengue virus	Flavivirus	Flaviviridae	ssRNA(+)	10647	GenBank	partial		Cambodia	Cambodia	Homo sapiens	blood	2019-07-01	Dengue virus type I isolate RR031_002_SERa_30953_reads_nh polyprotein (POLY) gene, complete cds; and sfRNA1 lncRNA gene, partial sequence
OK159958	Bohl,J.A., Manning,J.E., Lay,S., Chea,S., Brooks,C., Ahyong,V.	2021-09-20 21:00:00	RR031_007_SERa_30958_reads_nh	Dengue virus	Flavivirus	Flaviviridae	ssRNA(+)	10680	GenBank	partial		Cambodia	Cambodia	Homo sapiens	blood	2019-07-01	Dengue virus type I isolate RR031_007_SERa_30958_reads_nh polyprotein (POLY) gene, complete cds; and sfRNA1 lncRNA gene, partial sequence
OK159957	Bohl,J.A., Manning,J.E., Lay,S., Chea,S., Brooks,C., Ahyong,V.	2021-09-20 21:00:00	RR031_030_SERa_30981_reads_nh	Dengue virus	Flavivirus	Flaviviridae	ssRNA(+)	10647	GenBank	partial		Cambodia	Cambodia	Homo sapiens	blood	2019-07-01	Dengue virus type I isolate RR031_030_SERa_30981_reads_nh polyprotein (POLY) gene, complete cds; and sfRNA1 lncRNA gene, partial sequence
OK159956	Bohl,J.A., Manning,J.E., Lay,S., Chea,S., Brooks,C., Ahyong,V.	2021-09-20 21:00:00	RR031_032_SERa_30983_reads_nh	Dengue virus	Flavivirus	Flaviviridae	ssRNA(+)	10693	GenBank	partial		Cambodia	Cambodia	Homo sapiens	blood	2019-07-01	Dengue virus type I isolate RR031_032_SERa_30983_reads_nh polyprotein (POLY) gene, complete cds; and sfRNA1 lncRNA gene, partial sequence
OK159955	Bohl,J.A., Manning,J.E., Lay,S., Chea,S., Brooks,C., Ahyong,V.	2021-09-20 21:00:00	RR031_042_SERa_30993_reads_nh	Dengue virus	Flavivirus	Flaviviridae	ssRNA(+)	10680	GenBank	partial		Cambodia	Cambodia	Homo sapiens	blood	2019-08-01	Dengue virus type I isolate RR031_042_SERa_30993_reads_nh polyprotein (POLY) gene, complete cds; and sfRNA1 lncRNA gene, partial sequence
OK159954	Bohl,J.A., Manning,J.E., Lay,S., Chea,S., Brooks,C., Ahyong,V.	2021-09-20 21:00:00	RR031_048_SERa_30999_reads_nh	Dengue virus	Flavivirus	Flaviviridae	ssRNA(+)	10179	GenBank	partial		Cambodia	Cambodia	Homo sapiens	blood	2019-08-01	Dengue virus type I isolate RR031_048_SERa_30999_reads_nh polyprotein (POLY) gene, complete cds
OK159953	Bohl,J.A., Manning,J.E., Lay,S., Chea,S., Brooks,C., Ahyong,V.	2021-09-20 21:00:00	RR031_050_SERa_31001_reads_nh	Dengue virus	Flavivirus	Flaviviridae	ssRNA(+)	10648	GenBank	partial		Cambodia	Cambodia	Homo sapiens	blood	2019-08-01	Dengue virus type I isolate RR031_050_SERa_31001_reads_nh polyprotein (POLY) gene, complete cds; and sfRNA1 lncRNA gene, partial sequence
OK159952	Bohl,J.A., Manning,J.E., Lay,S., Chea,S., Brooks,C., Ahyong,V.	2021-09-20 21:00:00	RR031_052_SERa_31003_reads_nh	Dengue virus	Flavivirus	Flaviviridae	ssRNA(+)	10706	GenBank	partial		Cambodia	Cambodia	Homo sapiens	blood	2019-08-01	Dengue virus type I isolate RR031_052_SERa_31003_reads_nh polyprotein (POLY) gene, complete cds; and sfRNA1 lncRNA gene, partial sequence
OK159951	Bohl,J.A., Manning,J.E., Lay,S., Chea,S., Brooks,C., Ahyong,V.	2021-09-20 21:00:00	RR031_056_SERa_31007_reads_nh	Dengue virus	Flavivirus	Flaviviridae	ssRNA(+)	10678	GenBank	partial		Cambodia	Cambodia	Homo sapiens	blood	2019-08-01	Dengue virus type I isolate RR031_056_SERa_31007_reads_nh polyprotein (POLY) gene, complete cds; and sfRNA1 lncRNA gene, partial sequence
OK159950	Bohl,J.A., Manning,J.E., Lay,S., Chea,S., Brooks,C., Ahyong,V.	2021-09-20 21:00:00	RR031_057_SERa_31008_reads_nh	Dengue virus	Flavivirus	Flaviviridae	ssRNA(+)	10688	GenBank	partial		Cambodia	Cambodia	Homo sapiens	blood	2019-08-01	Dengue virus type I isolate RR031_057_SERa_31008_reads_nh polyprotein (POLY) gene, complete cds; and sfRNA1 lncRNA gene, partial sequence
OK159949	Bohl,J.A., Manning,J.E., Lay,S., Chea,S., Brooks,C., Ahyong,V.	2021-09-20 21:00:00	RR031_068_SERa_31018_reads_nh	Dengue virus	Flavivirus	Flaviviridae	ssRNA(+)	10677	GenBank	partial		Cambodia	Cambodia	Homo sapiens	blood	2019-08-01	Dengue virus type I isolate RR031_068_SERa_31018_reads_nh polyprotein (POLY) gene, complete cds; and sfRNA1 lncRNA gene, partial sequence
OK159948	Bohl,J.A., Manning,J.E., Lay,S., Chea,S., Brooks,C., Ahyong,V.	2021-09-20 21:00:00	RR031_073_SERa_31023_reads_nh	Dengue virus	Flavivirus	Flaviviridae	ssRNA(+)	10641	GenBank	partial		Cambodia	Cambodia	Homo sapiens	blood	2019-08-01	Dengue virus type I isolate RR031_073_SERa_31023_reads_nh polyprotein (POLY) gene, complete cds; and sfRNA1 lncRNA gene, partial sequence
OK159947	Bohl,J.A., Manning,J.E., Lay,S., Chea,S., Brooks,C., Ahyong,V.	2021-09-20 21:00:00	RR031_074_SERa_31024_reads_nh	Dengue virus	Flavivirus	Flaviviridae	ssRNA(+)	10179	GenBank	partial		Cambodia	Cambodia	Homo sapiens	blood	2019-08-01	Dengue virus type I isolate RR031_074_SERa_31024_reads_nh polyprotein (POLY) gene, complete cds
OK159946	Bohl,J.A., Manning,J.E., Lay,S., Chea,S., Brooks,C., Ahyong,V.	2021-09-20 21:00:00	RR031_078_SERa_31028_reads_nh	Dengue virus	Flavivirus	Flaviviridae	ssRNA(+)	10707	GenBank	partial		Cambodia	Cambodia	Homo sapiens	blood	2019-08-01	Dengue virus type I isolate RR031_078_SERa_31028_reads_nh polyprotein (POLY) gene, complete cds; and sfRNA1 lncRNA gene, partial sequence
OK159945	Bohl,J.A., Manning,J.E., Lay,S., Chea,S., Brooks,C., Ahyong,V.	2021-09-20 21:00:00	RR031_126_SERa_31076_reads_nh	Dengue virus	Flavivirus	Flaviviridae	ssRNA(+)	10684	GenBank	partial		Cambodia	Cambodia	Homo sapiens	blood	2019-05-01	Dengue virus 1 isolate RR031_126_SERa_31076_reads_nh polyprotein (POLY) gene, complete cds; and sfRNA1 lncRNA gene, partial sequence
OK159944	Bohl,J.A., Manning,J.E., Lay,S., Chea,S., Brooks,C., Ahyong,V.	2021-09-20 21:00:00	RR031_138_SERa_31081_reads_nh	Dengue virus	Flavivirus	Flaviviridae	ssRNA(+)	10677	GenBank	partial		Cambodia	Cambodia	Homo sapiens	blood	2019-04-01	Dengue virus type I isolate RR031_138_SERa_31081_reads_nh polyprotein (POLY) gene, complete cds; and sfRNA1 lncRNA gene, partial sequence
OK159943	Bohl,J.A., Manning,J.E., Lay,S., Chea,S., Brooks,C., Ahyong,V.	2021-09-20 21:00:00	RR031_140_SERa_31083_reads_nh	Dengue virus	Flavivirus	Flaviviridae	ssRNA(+)	10689	GenBank	partial		Cambodia	Cambodia	Homo sapiens	blood	2019-05-01	Dengue virus type I isolate RR031_140_SERa_31083_reads_nh polyprotein (POLY) gene, complete cds; and sfRNA1 lncRNA gene, partial sequence
OK159942	Bohl,J.A., Manning,J.E., Lay,S., Chea,S., Brooks,C., Ahyong,V.	2021-09-20 21:00:00	RR031_147_SERa_31091_reads_nh	Dengue virus	Flavivirus	Flaviviridae	ssRNA(+)	10641	GenBank	partial		Cambodia	Cambodia	Homo sapiens	blood	2019-06-01	Dengue virus type I isolate RR031_147_SERa_31091_reads_nh polyprotein (POLY) gene, complete cds; and sfRNA1 lncRNA gene, partial sequence
OK159941	Bohl,J.A., Manning,J.E., Lay,S., Chea,S., Brooks,C., Ahyong,V.	2021-09-20 21:00:00	RR031_151_SERa_31095_reads_nh	Dengue virus	Flavivirus	Flaviviridae	ssRNA(+)	10706	GenBank	partial		Cambodia	Cambodia	Homo sapiens	blood	2019-06-01	Dengue virus type I isolate RR031_151_SERa_31095_reads_nh polyprotein (POLY) gene, complete cds; and sfRNA1 lncRNA gene, partial sequence
OK159940	Bohl,J.A., Manning,J.E., Lay,S., Chea,S., Brooks,C., Ahyong,V.	2021-09-20 21:00:00	RR031_157_SERa_31101_reads_nh	Dengue virus	Flavivirus	Flaviviridae	ssRNA(+)	10668	GenBank	partial		Cambodia	Cambodia	Homo sapiens	blood	2019-07-01	Dengue virus type I isolate RR031_157_SERa_31101_reads_nh polyprotein (POLY) gene, complete cds; and sfRNA1 lncRNA gene, partial sequence
OK159939	Bohl,J.A., Manning,J.E., Lay,S., Chea,S., Brooks,C., Ahyong,V.	2021-09-20 21:00:00	RR031_160_SERa_31104_reads_nh	Dengue virus	Flavivirus	Flaviviridae	ssRNA(+)	10706	GenBank	partial		Cambodia	Cambodia	Homo sapiens	blood	2019-07-01	Dengue virus type I isolate RR031_160_SERa_31104_reads_nh polyprotein (POLY) gene, complete cds; and sfRNA1 lncRNA gene, partial sequence
OK159938	Bohl,J.A., Manning,J.E., Lay,S., Chea,S., Brooks,C., Ahyong,V.	2021-09-20 21:00:00	RR031_165_SERa_31109_reads_nh	Dengue virus	Flavivirus	Flaviviridae	ssRNA(+)	10693	GenBank	partial		Cambodia	Cambodia	Homo sapiens	blood	2019-07-01	Dengue virus type I isolate RR031_165_SERa_31109_reads_nh polyprotein (POLY) gene, complete cds; and sfRNA1 lncRNA gene, partial sequence
OK159937	Bohl,J.A., Manning,J.E., Lay,S., Chea,S., Brooks,C., Ahyong,V.	2021-09-20 21:00:00	RR031_258_SERa_31129_reads_nh	Dengue virus	Flavivirus	Flaviviridae	ssRNA(+)	10677	GenBank	partial		Cambodia	Cambodia	Homo sapiens	blood	2019-07-01	Dengue virus type I isolate RR031_258_SERa_31129_reads_nh polyprotein (POLY) gene, complete cds; and sfRNA1 lncRNA gene, partial sequence
OK159936	Bohl,J.A., Manning,J.E., Lay,S., Chea,S., Brooks,C., Ahyong,V.	2021-09-20 21:00:00	RR031_265_SERa_31134_reads_nh	Dengue virus	Flavivirus	Flaviviridae	ssRNA(+)	10641	GenBank	partial		Cambodia	Cambodia	Homo sapiens	blood	2019-07-01	Dengue virus type I isolate RR031_265_SERa_31134_reads_nh polyprotein (POLY) gene, complete cds; and sfRNA1 lncRNA gene, partial sequence
OK159935	Bohl,J.A., Manning,J.E., Lay,S., Chea,S., Brooks,C., Ahyong,V.	2021-09-20 21:00:00	RR031_270_SERa_31139_reads_nh	Dengue virus	Flavivirus	Flaviviridae	ssRNA(+)	10641	GenBank	partial		Cambodia	Cambodia	Homo sapiens	blood	2019-08-01	Dengue virus type I isolate RR031_270_SERa_31139_reads_nh polyprotein (POLY) gene, complete cds; and sfRNA1 lncRNA gene, partial sequence
OK040060	Alfsnes,K., Eldholm,V., Gaunt,M.W., de Lamballerie,X., Gould,E.A., Pettersson,J.H., Gaunt,M., Gould,E.	2021-11-17 21:00:00	KAJP4_DENV1_Somalia_Eastern.Africa_2011	Dengue virus	Flavivirus	Flaviviridae	ssRNA(+)	10173	GenBank	partial		Somalia	Somalia	Homo sapiens	blood	2011-01-01	Dengue virus 1 isolate KAJP4_DENV1_Somalia_Eastern.Africa_2011 polyprotein (POLY) gene, complete cds
OK040059	Alfsnes,K., Eldholm,V., Gaunt,M.W., de Lamballerie,X., Gould,E.A., Pettersson,J.H., Gaunt,M., Gould,E.	2021-11-17 21:00:00	KAJP18_DENV1_Kenya_Eastern.Africa_2016	Dengue virus	Flavivirus	Flaviviridae	ssRNA(+)	10161	GenBank	partial		Kenya	Kenya	Homo sapiens	blood	2016-01-01	Dengue virus 1 isolate KAJP18_DENV1_Kenya_Eastern.Africa_2016 polyprotein (POLY) gene, complete cds
MZ945530	Santiago,G.A., Gonzalez-Morales,G., Flores,B., Charriez,K.N., Munoz-Jordan,J.L., Broussard,K.	2021-08-31 21:00:00	US/DB274/2020	Dengue virus	Flavivirus	Flaviviridae	ssRNA(+)	10389	GenBank	partial		USA: Texas	USA	Homo sapiens	blood	2020-11-18	Dengue virus type I isolate US/DB274/2020 polyprotein (POLY) gene, complete cds; and sfRNA1 lncRNA gene, partial sequence
MZ857227	Alfsnes,K., Eldholm,V., Gaunt,M.W., de Lamballerie,X., Gould,E.A., Pettersson,J.H., Gaunt,M., Gould,E.	2021-11-17 21:00:00	KAJP34_DENV1_Thailand_South.East.Asia_1992-02-12	Dengue virus	Flavivirus	Flaviviridae	ssRNA(+)	10179	GenBank	partial		Thailand	Thailand	Homo sapiens	blood	1992-02-12	Dengue virus 1 isolate KAJP34_DENV1_Thailand_South.East.Asia_1992-02-12 polyprotein (POLY) gene, complete cds
MZ857224	Alfsnes,K., Eldholm,V., Gaunt,M.W., de Lamballerie,X., Gould,E.A., Pettersson,J.H., Gaunt,M., Gould,E.	2021-11-17 21:00:00	KAJP30_DENV1_Thailand_South.East.Asia_1990-05-23	Dengue virus	Flavivirus	Flaviviridae	ssRNA(+)	10179	GenBank	partial		Thailand	Thailand	Homo sapiens	blood	1990-05-23	Dengue virus 1 isolate KAJP30_DENV1_Thailand_South.East.Asia_1990-05-23 polyprotein (POLY) gene, complete cds
MZ857223	Alfsnes,K., Eldholm,V., Gaunt,M.W., de Lamballerie,X., Gould,E.A., Pettersson,J.H., Gaunt,M., Gould,E.	2021-11-17 21:00:00	KAJP27_DENV1_Sumatra_South.East.Asia_2006	Dengue virus	Flavivirus	Flaviviridae	ssRNA(+)	10179	GenBank	partial		Indonesia	Indonesia	Homo sapiens	blood	2006-01-01	Dengue virus 1 isolate KAJP27_DENV1_Sumatra_South.East.Asia_2006 polyprotein (POLY) gene, complete cds
MZ857216	Alfsnes,K., Eldholm,V., Gaunt,M.W., de Lamballerie,X., Gould,E.A., Pettersson,J.H., Gaunt,M., Gould,E.	2021-11-17 21:00:00	KAJP17_DENV1_Eritrea_Eastern.Africa_2015	Dengue virus	Flavivirus	Flaviviridae	ssRNA(+)	10179	GenBank	partial		Eritrea	Eritrea	Homo sapiens	blood	2015-01-01	Dengue virus 1 isolate KAJP17_DENV1_Eritrea_Eastern.Africa_2015 polyprotein (POLY) gene, complete cds
MZ857206	Alfsnes,K., Eldholm,V., Gaunt,M.W., de Lamballerie,X., Gould,E.A., Pettersson,J.H., Gaunt,M., Gould,E.	2021-11-17 21:00:00	KAJP7_DENV1_Kenya_Eastern.Africa_2013	Dengue virus	Flavivirus	Flaviviridae	ssRNA(+)	10179	GenBank	partial		Kenya	Kenya	Homo sapiens	blood	2013-01-01	Dengue virus 1 isolate KAJP7_DENV1_Kenya_Eastern.Africa_2013 polyprotein (POLY) gene, complete cds
MZ857203	Alfsnes,K., Eldholm,V., Gaunt,M.W., de Lamballerie,X., Gould,E.A., Pettersson,J.H., Gaunt,M., Gould,E.	2021-11-17 21:00:00	KAJP2_DENV1_Gambia_Western.Africa_2010	Dengue virus	Flavivirus	Flaviviridae	ssRNA(+)	10179	GenBank	partial		Gambia	Gambia	Homo sapiens	blood	2010-01-01	Dengue virus 1 isolate KAJP2_DENV1_Gambia_Western.Africa_2010 polyprotein (POLY) gene, complete cds
MZ773407	Cardona-Ospina,J.A., Rojas-Gallardo,D.M., Restrepo-Chica,J., Denham,J.D., Millan,N., Acosta,A., Castrillon-Spitia,J.D., Casas,W., Lagos-Grisales,G.J., Rodriguez-Morales,A.J., Galeano-Jaramillo,E., Tabares-Villa,F.A., Trujillo,A.M., Jimenez-Posada,E.V., Martinez-Gutierrez,M., Ruiz-Saenz,J., Waggoner,J., Collins,M.H., Piantadosi,A.	2021-08-16 21:00:00	AFI007	Dengue virus	Flavivirus	Flaviviridae	ssRNA(+)	10669	GenBank	partial		Colombia	Colombia	Homo sapiens	blood	2019-09-01	Dengue virus type I isolate AFI007 polyprotein (POLY) gene, complete cds; and sfRNA1 lncRNA gene, partial sequence
MZ619041	Poltep,K., Phadungsombat,J., Nakayama,E.E., Kosoltanapiwat,N., Hanboonkunupakarn,B., Wiriyarat,W., Shioda,T., Leaungwutiwong,P.	2021-10-07 21:00:00	DV1I-TM19-74-NGS	Dengue virus	Flavivirus	Flaviviridae	ssRNA(+)	10725	GenBank	partial		Thailand: Bangkok	Thailand	Homo sapiens	blood	2019-12-28	Dengue virus type I isolate DV1I-TM19-74-NGS polyprotein (POLY) gene, complete cds; and sfRNA1 lncRNA gene, partial sequence
MZ619040	Poltep,K., Phadungsombat,J., Nakayama,E.E., Kosoltanapiwat,N., Hanboonkunupakarn,B., Wiriyarat,W., Shioda,T., Leaungwutiwong,P.	2021-10-07 21:00:00	DV1I-TM19-70-NGS	Dengue virus	Flavivirus	Flaviviridae	ssRNA(+)	10725	GenBank	partial		Thailand: Bangkok	Thailand	Homo sapiens	blood	2019-12-23	Dengue virus type I isolate DV1I-TM19-70-NGS polyprotein (POLY) gene, complete cds; and sfRNA1 lncRNA gene, partial sequence
MZ619039	Poltep,K., Phadungsombat,J., Nakayama,E.E., Kosoltanapiwat,N., Hanboonkunupakarn,B., Wiriyarat,W., Shioda,T., Leaungwutiwong,P.	2021-10-07 21:00:00	DV1I-TM19-40-NGS	Dengue virus	Flavivirus	Flaviviridae	ssRNA(+)	10725	GenBank	partial		Thailand: Bangkok	Thailand	Homo sapiens	blood	2019-11-29	Dengue virus type I isolate DV1I-TM19-40-NGS polyprotein (POLY) gene, complete cds; and sfRNA1 lncRNA gene, partial sequence
MZ619038	Poltep,K., Phadungsombat,J., Nakayama,E.E., Kosoltanapiwat,N., Hanboonkunupakarn,B., Wiriyarat,W., Shioda,T., Leaungwutiwong,P.	2021-10-07 21:00:00	DV1I-TM19-33-NGS	Dengue virus	Flavivirus	Flaviviridae	ssRNA(+)	10725	GenBank	partial		Thailand: Bangkok	Thailand	Homo sapiens	blood	2019-11-27	Dengue virus type I isolate DV1I-TM19-33-NGS polyprotein (POLY) gene, complete cds; and sfRNA1 lncRNA gene, partial sequence
MZ619037	Poltep,K., Phadungsombat,J., Nakayama,E.E., Kosoltanapiwat,N., Hanboonkunupakarn,B., Wiriyarat,W., Shioda,T., Leaungwutiwong,P.	2021-10-07 21:00:00	DV1I-TM19-12-NGS	Dengue virus	Flavivirus	Flaviviridae	ssRNA(+)	10725	GenBank	partial		Thailand: Bangkok	Thailand	Homo sapiens	blood	2019-11-19	Dengue virus type I isolate DV1I-TM19-12-NGS polyprotein (POLY) gene, complete cds; and sfRNA1 lncRNA gene, partial sequence
MZ619036	Poltep,K., Phadungsombat,J., Nakayama,E.E., Kosoltanapiwat,N., Hanboonkunupakarn,B., Wiriyarat,W., Shioda,T., Leaungwutiwong,P.	2021-10-07 21:00:00	DV1I-TM19-09-NGS	Dengue virus	Flavivirus	Flaviviridae	ssRNA(+)	10725	GenBank	partial		Thailand: Bangkok	Thailand	Homo sapiens	blood	2019-11-16	Dengue virus type I isolate DV1I-TM19-09-NGS polyprotein (POLY) gene, complete cds; and sfRNA1 lncRNA gene, partial sequence
MZ343259	Palermo,P.M., Mora-Covarrubias,A., Orbegozo,J., Plante,J.A., Plante,K.S., Jimenez,F., Watts,D.M.	2021-06-10 21:00:00	Ciudad Juarez	Dengue virus	Flavivirus	Flaviviridae	ssRNA(+)	10613	GenBank	partial		Mexico	Mexico	Homo sapiens	blood	2015-11-01	Dengue virus type I isolate Ciudad Juarez polyprotein (POLY) gene, complete cds; and sfRNA1 lncRNA gene, partial sequence
MZ312930	Jagtap,S., Pattabiraman,C., Sankaradoss,A., Pandit,A., Nisheetha,A., Krishna,S., Roy,R., Vedpathak,M., Agrawal,S., Shastri,J.	2021-09-27 21:00:00	FT_MD_193_R4_DENV1D_III_India	Dengue virus	Flavivirus	Flaviviridae	ssRNA(+)	10620	GenBank	partial	III	India	India	Homo sapiens	blood	2018-10-26	Dengue virus type I isolate FT_MD_193_R4_DENV1D_III_India polyprotein (POLY) gene, complete cds; and sfRNA1 lncRNA gene, partial sequence
MZ312929	Jagtap,S., Pattabiraman,C., Sankaradoss,A., Pandit,A., Nisheetha,A., Krishna,S., Roy,R., Vedpathak,M., Agrawal,S., Shastri,J.	2021-09-27 21:00:00	FT_MD_191_R4_DENV1D_III_India	Dengue virus	Flavivirus	Flaviviridae	ssRNA(+)	10427	GenBank	partial	III	India	India	Homo sapiens	blood	2018-10-25	Dengue virus type I isolate FT_MD_191_R4_DENV1D_III_India polyprotein (POLY) gene, complete cds; and sfRNA1 lncRNA gene, partial sequence
MZ312928	Jagtap,S., Pattabiraman,C., Sankaradoss,A., Pandit,A., Nisheetha,A., Krishna,S., Roy,R., Vedpathak,M., Agrawal,S., Shastri,J.	2021-09-27 21:00:00	FT_MD_190_R4_DENV1D_III_India	Dengue virus	Flavivirus	Flaviviridae	ssRNA(+)	10412	GenBank	partial	III	India	India	Homo sapiens	blood	2018-10-25	Dengue virus type I isolate FT_MD_190_R4_DENV1D_III_India polyprotein (POLY) gene, partial cds; and sfRNA1 lncRNA gene, partial sequence
MZ312927	Jagtap,S., Pattabiraman,C., Sankaradoss,A., Pandit,A., Nisheetha,A., Krishna,S., Roy,R., Vedpathak,M., Agrawal,S., Shastri,J.	2021-09-27 21:00:00	FT_MD_169_R4_DENV1D_III_India	Dengue virus	Flavivirus	Flaviviridae	ssRNA(+)	10713	GenBank	partial	III	India	India	Homo sapiens	blood	2018-09-28	Dengue virus type I isolate FT_MD_169_R4_DENV1D_III_India polyprotein (POLY) gene, complete cds; and sfRNA1 lncRNA gene, complete sequence
MZ312926	Jagtap,S., Pattabiraman,C., Sankaradoss,A., Pandit,A., Nisheetha,A., Krishna,S., Roy,R., Vedpathak,M., Agrawal,S., Shastri,J.	2021-09-27 21:00:00	FT_MD_161_R4_DENV1D_III_India	Dengue virus	Flavivirus	Flaviviridae	ssRNA(+)	10713	GenBank	partial	III	India	India	Homo sapiens	blood	2018-09-17	Dengue virus type I isolate FT_MD_161_R4_DENV1D_III_India polyprotein (POLY) gene, complete cds; and sfRNA1 lncRNA gene, complete sequence
MZ312925	Jagtap,S., Pattabiraman,C., Sankaradoss,A., Pandit,A., Nisheetha,A., Krishna,S., Roy,R., Vedpathak,M., Agrawal,S., Shastri,J.	2021-09-27 21:00:00	FT_MD_132_R4_DENV1D_III_India	Dengue virus	Flavivirus	Flaviviridae	ssRNA(+)	10482	GenBank	partial	III	India	India	Homo sapiens	blood	2018-09-05	Dengue virus type I isolate FT_MD_132_R4_DENV1D_III_India polyprotein (POLY) gene, complete cds; and sfRNA1 lncRNA gene, partial sequence
MZ312924	Jagtap,S., Pattabiraman,C., Sankaradoss,A., Pandit,A., Nisheetha,A., Krishna,S., Roy,R., Vedpathak,M., Agrawal,S., Shastri,J.	2021-09-27 21:00:00	FT_MD_120_R4_DENV1D_III_India	Dengue virus	Flavivirus	Flaviviridae	ssRNA(+)	10713	GenBank	partial	III	India	India	Homo sapiens	blood	2018-08-28	Dengue virus type I isolate FT_MD_120_R4_DENV1D_III_India polyprotein (POLY) gene, complete cds; and sfRNA1 lncRNA gene, complete sequence
MZ312923	Jagtap,S., Pattabiraman,C., Sankaradoss,A., Pandit,A., Nisheetha,A., Krishna,S., Roy,R., Vedpathak,M., Agrawal,S., Shastri,J.	2021-09-27 21:00:00	FT_MD_112_R4_DENV1D_III_India	Dengue virus	Flavivirus	Flaviviridae	ssRNA(+)	10713	GenBank	partial	III	India	India	Homo sapiens	blood	2018-08-27	Dengue virus type I isolate FT_MD_112_R4_DENV1D_III_India polyprotein (POLY) gene, complete cds; and sfRNA1 lncRNA gene, complete sequence
MZ312922	Jagtap,S., Pattabiraman,C., Sankaradoss,A., Pandit,A., Nisheetha,A., Krishna,S., Roy,R., Vedpathak,M., Agrawal,S., Shastri,J.	2021-09-27 21:00:00	FT_MD_106_R4_DENV1D_III_India	Dengue virus	Flavivirus	Flaviviridae	ssRNA(+)	10431	GenBank	partial	III	India	India	Homo sapiens	blood	2018-08-21	Dengue virus type I isolate FT_MD_106_R4_DENV1D_III_India polyprotein (POLY) gene, complete cds; and sfRNA1 lncRNA gene, partial sequence
MZ291446	Barzon,L., Riccetti,S., Sinigaglia,A., Lazzarini,L.	2021-05-29 21:00:00	VI/Italy/2020	Dengue virus	Flavivirus	Flaviviridae	ssRNA(+)	10617	GenBank	partial		Italy	Italy	Homo sapiens	blood	2020-08-01	Dengue virus type I isolate VI/Italy/2020 polyprotein (POLY) gene, complete cds; and sfRNA1 lncRNA gene, partial sequence
MZ229305	Jagtap,S., Pattabiraman,C., Sankaradoss,A., Kumar,A., Nisheetha,A., Pandit,A., Marimuthu,S., Krishna,S., Roy,R., Dias,M.	2021-09-27 21:00:00	FT_J290_S61_R2_DENV1D_III_India	Dengue virus	Flavivirus	Flaviviridae	ssRNA(+)	10714	GenBank	partial	III	India	India	Homo sapiens	blood	2016-09-10	Dengue virus type I isolate FT_J290_S61_R2_DENV1D_III_India polyprotein (POLY) gene, complete cds; and sfRNA1 lncRNA gene, complete sequence
MZ229304	Jagtap,S., Pattabiraman,C., Sankaradoss,A., Kumar,A., Nisheetha,A., Pandit,A., Marimuthu,S., Krishna,S., Roy,R., Dias,M.	2021-09-27 21:00:00	FT_DNS1_95_S2_R3_DENV1D_III_India	Dengue virus	Flavivirus	Flaviviridae	ssRNA(+)	10519	GenBank	partial	III	India	India	Homo sapiens	blood	2016-08-10	Dengue virus type I isolate FT_DNS1_95_S2_R3_DENV1D_III_India polyprotein (POLY) gene, complete cds; and sfRNA1 lncRNA gene, partial sequence
MZ008453	Edgerton,S.V., Thongsripong,P., Wang,C., Montaya,M., Balmaseda,A., Harris,E., Bennett,S.N.	2021-04-27 21:00:00	D1/NI/4718_10a/2013	Dengue virus	Flavivirus	Flaviviridae	ssRNA(+)	10630	GenBank	partial		Nicaragua	Nicaragua	Homo sapiens	blood	2013-01-01	Dengue virus type I isolate D1/NI/4718_10a/2013 polyprotein (POLY) gene, complete cds; and sfRNA1 lncRNA gene, partial sequence
MZ008452	Edgerton,S.V., Thongsripong,P., Wang,C., Montaya,M., Balmaseda,A., Harris,E., Bennett,S.N.	2021-04-27 21:00:00	D1/NI/1735_1E/2014	Dengue virus	Flavivirus	Flaviviridae	ssRNA(+)	10678	GenBank	partial		Nicaragua	Nicaragua	Homo sapiens	blood	2014-01-01	Dengue virus type I isolate D1/NI/1735_1E/2014 polyprotein (POLY) gene, complete cds; and sfRNA1 lncRNA gene, partial sequence
MZ008451	Edgerton,S.V., Thongsripong,P., Wang,C., Montaya,M., Balmaseda,A., Harris,E., Bennett,S.N.	2021-04-27 21:00:00	D1/NI/1731_1E/2013	Dengue virus	Flavivirus	Flaviviridae	ssRNA(+)	10689	GenBank	partial		Nicaragua	Nicaragua	Homo sapiens	blood	2013-01-01	Dengue virus type I isolate D1/NI/1731_1E/2013 polyprotein (POLY) gene, complete cds; and sfRNA1 lncRNA gene, partial sequence
MZ008450	Edgerton,S.V., Thongsripong,P., Wang,C., Montaya,M., Balmaseda,A., Harris,E., Bennett,S.N.	2021-04-27 21:00:00	D1/NI/1690_1E/2013	Dengue virus	Flavivirus	Flaviviridae	ssRNA(+)	10615	GenBank	partial		Nicaragua	Nicaragua	Homo sapiens	blood	2013-01-01	Dengue virus type I isolate D1/NI/1690_1E/2013 polyprotein (POLY) gene, complete cds; and sfRNA1 lncRNA gene, partial sequence
MZ008449	Edgerton,S.V., Thongsripong,P., Wang,C., Montaya,M., Balmaseda,A., Harris,E., Bennett,S.N.	2021-04-27 21:00:00	D1/NI/1656_1E/2013	Dengue virus	Flavivirus	Flaviviridae	ssRNA(+)	10693	GenBank	partial		Nicaragua	Nicaragua	Homo sapiens	blood	2013-01-01	Dengue virus type I isolate D1/NI/1656_1E/2013 polyprotein (POLY) gene, complete cds; and sfRNA1 lncRNA gene, partial sequence
MZ008448	Edgerton,S.V., Thongsripong,P., Wang,C., Montaya,M., Balmaseda,A., Harris,E., Bennett,S.N.	2021-04-27 21:00:00	D1/NI/1653_1E/2013	Dengue virus	Flavivirus	Flaviviridae	ssRNA(+)	10732	GenBank	partial		Nicaragua	Nicaragua	Homo sapiens	blood	2013-01-01	Dengue virus type I isolate D1/NI/1653_1E/2013 polyprotein (POLY) gene, complete cds; and sfRNA1 lncRNA gene, complete sequence
MZ008447	Edgerton,S.V., Thongsripong,P., Wang,C., Montaya,M., Balmaseda,A., Harris,E., Bennett,S.N.	2021-04-27 21:00:00	D1/NI/1597_1E/2013	Dengue virus	Flavivirus	Flaviviridae	ssRNA(+)	10697	GenBank	partial		Nicaragua	Nicaragua	Homo sapiens	blood	2013-01-01	Dengue virus type I isolate D1/NI/1597_1E/2013 polyprotein (POLY) gene, complete cds; and sfRNA1 lncRNA gene, partial sequence
MZ008446	Edgerton,S.V., Thongsripong,P., Wang,C., Montaya,M., Balmaseda,A., Harris,E., Bennett,S.N.	2021-04-27 21:00:00	D1/NI/1592_1E/2013	Dengue virus	Flavivirus	Flaviviridae	ssRNA(+)	10721	GenBank	partial		Nicaragua	Nicaragua	Homo sapiens	blood	2013-01-01	Dengue virus type I isolate D1/NI/1592_1E/2013 polyprotein (POLY) gene, complete cds; and sfRNA1 lncRNA gene, partial sequence
MZ008445	Edgerton,S.V., Thongsripong,P., Wang,C., Montaya,M., Balmaseda,A., Harris,E., Bennett,S.N.	2021-04-27 21:00:00	D1/NI/1591_1E/2013	Dengue virus	Flavivirus	Flaviviridae	ssRNA(+)	10679	GenBank	partial		Nicaragua	Nicaragua	Homo sapiens	blood	2013-01-01	Dengue virus type I isolate D1/NI/1591_1E/2013 polyprotein (POLY) gene, complete cds; and sfRNA1 lncRNA gene, partial sequence
MZ008444	Edgerton,S.V., Thongsripong,P., Wang,C., Montaya,M., Balmaseda,A., Harris,E., Bennett,S.N.	2021-04-27 21:00:00	D1/NI/1582_1E/2013	Dengue virus	Flavivirus	Flaviviridae	ssRNA(+)	10731	GenBank	partial		Nicaragua	Nicaragua	Homo sapiens	blood	2013-01-01	Dengue virus type I isolate D1/NI/1582_1E/2013 polyprotein (POLY) gene, complete cds; and sfRNA1 lncRNA gene, partial sequence
MZ008443	Edgerton,S.V., Thongsripong,P., Wang,C., Montaya,M., Balmaseda,A., Harris,E., Bennett,S.N.	2021-04-27 21:00:00	D1/NI/1575_1E/2013	Dengue virus	Flavivirus	Flaviviridae	ssRNA(+)	10731	GenBank	partial		Nicaragua	Nicaragua	Homo sapiens	blood	2013-01-01	Dengue virus type I isolate D1/NI/1575_1E/2013 polyprotein (POLY) gene, complete cds; and sfRNA1 lncRNA gene, partial sequence
MZ008442	Edgerton,S.V., Thongsripong,P., Wang,C., Montaya,M., Balmaseda,A., Harris,E., Bennett,S.N.	2021-04-27 21:00:00	D1/NI/1580_1E/2013	Dengue virus	Flavivirus	Flaviviridae	ssRNA(+)	10731	GenBank	partial		Nicaragua	Nicaragua	Homo sapiens	blood	2013-01-01	Dengue virus type I isolate D1/NI/1580_1E/2013 polyprotein (POLY) gene, complete cds; and sfRNA1 lncRNA gene, partial sequence
MZ008441	Edgerton,S.V., Thongsripong,P., Wang,C., Montaya,M., Balmaseda,A., Harris,E., Bennett,S.N.	2021-04-27 21:00:00	D1/NI/1572_1E/2013	Dengue virus	Flavivirus	Flaviviridae	ssRNA(+)	10729	GenBank	partial		Nicaragua	Nicaragua	Homo sapiens	blood	2013-01-01	Dengue virus type I isolate D1/NI/1572_1E/2013 polyprotein (POLY) gene, complete cds; and sfRNA1 lncRNA gene, partial sequence
MZ008440	Edgerton,S.V., Thongsripong,P., Wang,C., Montaya,M., Balmaseda,A., Harris,E., Bennett,S.N.	2021-04-27 21:00:00	D1/NI/1548_1E/2013	Dengue virus	Flavivirus	Flaviviridae	ssRNA(+)	10628	GenBank	partial		Nicaragua	Nicaragua	Homo sapiens	blood	2013-01-01	Dengue virus type I isolate D1/NI/1548_1E/2013 polyprotein (POLY) gene, complete cds; and sfRNA1 lncRNA gene, partial sequence
MZ008439	Edgerton,S.V., Thongsripong,P., Wang,C., Montaya,M., Balmaseda,A., Harris,E., Bennett,S.N.	2021-04-27 21:00:00	D1/NI/1527_1E/2013	Dengue virus	Flavivirus	Flaviviridae	ssRNA(+)	10731	GenBank	partial		Nicaragua	Nicaragua	Homo sapiens	blood	2013-01-01	Dengue virus type I isolate D1/NI/1527_1E/2013 polyprotein (POLY) gene, complete cds; and sfRNA1 lncRNA gene, partial sequence
MZ008438	Edgerton,S.V., Thongsripong,P., Wang,C., Montaya,M., Balmaseda,A., Harris,E., Bennett,S.N.	2021-04-27 21:00:00	D1/NI/1530_1E/2013	Dengue virus	Flavivirus	Flaviviridae	ssRNA(+)	10477	GenBank	partial		Nicaragua	Nicaragua	Homo sapiens	blood	2013-01-01	Dengue virus type I isolate D1/NI/1530_1E/2013 polyprotein (POLY) gene, complete cds; and sfRNA1 lncRNA gene, partial sequence
MW946254	Katzelnick,L., Escoto,A., Huang,A., Garcia-Carreras,B., Chowdhury,N., Berry,I., Chavez,C., Rutvisuttinunt,W., Buchy,P., Duong,V., Dussart,P., Gromowski,G., Macareo,L., Smith,D., Jarman,R., Whitehead,S., Salje,H., Cummings,D., Lessler,J., Melendrez,M., Endy,T., Kalanarooj,S., A-Nuegoonpipat,A., Chanama,S., Sangkijporn,S., Klungthong,C., Thaisomboonsuk,B., Nisalak,A., Gibbons,R., Iamsirithaworn,S.,…	2021-04-22 21:00:00	00769/95	Dengue virus	Flavivirus	Flaviviridae	ssRNA(+)	10179	GenBank	partial		Thailand	Thailand	Homo sapiens		1995-01-01	Dengue virus type I isolate 00769/95 polyprotein (POLY) gene, complete cds
MW946253	Katzelnick,L., Escoto,A., Huang,A., Garcia-Carreras,B., Chowdhury,N., Berry,I., Chavez,C., Rutvisuttinunt,W., Buchy,P., Duong,V., Dussart,P., Gromowski,G., Macareo,L., Smith,D., Jarman,R., Whitehead,S., Salje,H., Cummings,D., Lessler,J., Melendrez,M., Endy,T., Kalanarooj,S., A-Nuegoonpipat,A., Chanama,S., Sangkijporn,S., Klungthong,C., Thaisomboonsuk,B., Nisalak,A., Gibbons,R., Iamsirithaworn,S.,…	2021-04-22 21:00:00	IQT-6152	Dengue virus	Flavivirus	Flaviviridae	ssRNA(+)	10179	GenBank	partial		Peru	Peru	Homo sapiens		2000-01-01	Dengue virus type I isolate IQT-6152 polyprotein (POLY) gene, complete cds
MW946252	Katzelnick,L., Escoto,A., Huang,A., Garcia-Carreras,B., Chowdhury,N., Berry,I., Chavez,C., Rutvisuttinunt,W., Buchy,P., Duong,V., Dussart,P., Gromowski,G., Macareo,L., Smith,D., Jarman,R., Whitehead,S., Salje,H., Cummings,D., Lessler,J., Melendrez,M., Endy,T., Kalanarooj,S., A-Nuegoonpipat,A., Chanama,S., Sangkijporn,S., Klungthong,C., Thaisomboonsuk,B., Nisalak,A., Gibbons,R., Iamsirithaworn,S.,…	2021-04-22 21:00:00	00758/14	Dengue virus	Flavivirus	Flaviviridae	ssRNA(+)	10179	GenBank	partial		Thailand	Thailand	Homo sapiens		2014-01-01	Dengue virus type I isolate 00758/14 polyprotein (POLY) gene, complete cds
MW946251	Katzelnick,L., Escoto,A., Huang,A., Garcia-Carreras,B., Chowdhury,N., Berry,I., Chavez,C., Rutvisuttinunt,W., Buchy,P., Duong,V., Dussart,P., Gromowski,G., Macareo,L., Smith,D., Jarman,R., Whitehead,S., Salje,H., Cummings,D., Lessler,J., Melendrez,M., Endy,T., Kalanarooj,S., A-Nuegoonpipat,A., Chanama,S., Sangkijporn,S., Klungthong,C., Thaisomboonsuk,B., Nisalak,A., Gibbons,R., Iamsirithaworn,S.,…	2021-04-22 21:00:00	04347/99	Dengue virus	Flavivirus	Flaviviridae	ssRNA(+)	10179	GenBank	partial		Thailand	Thailand	Homo sapiens		1999-01-01	Dengue virus type I isolate 04347/99 polyprotein (POLY) gene, complete cds
MW946250	Katzelnick,L., Escoto,A., Huang,A., Garcia-Carreras,B., Chowdhury,N., Berry,I., Chavez,C., Rutvisuttinunt,W., Buchy,P., Duong,V., Dussart,P., Gromowski,G., Macareo,L., Smith,D., Jarman,R., Whitehead,S., Salje,H., Cummings,D., Lessler,J., Melendrez,M., Endy,T., Kalanarooj,S., A-Nuegoonpipat,A., Chanama,S., Sangkijporn,S., Klungthong,C., Thaisomboonsuk,B., Nisalak,A., Gibbons,R., Iamsirithaworn,S.,…	2021-04-22 21:00:00	01710/06	Dengue virus	Flavivirus	Flaviviridae	ssRNA(+)	10179	GenBank	partial		Thailand	Thailand	Homo sapiens		2006-01-01	Dengue virus type I isolate 01710/06 polyprotein (POLY) gene, complete cds
MW946249	Katzelnick,L., Escoto,A., Huang,A., Garcia-Carreras,B., Chowdhury,N., Berry,I., Chavez,C., Rutvisuttinunt,W., Buchy,P., Duong,V., Dussart,P., Gromowski,G., Macareo,L., Smith,D., Jarman,R., Whitehead,S., Salje,H., Cummings,D., Lessler,J., Melendrez,M., Endy,T., Kalanarooj,S., A-Nuegoonpipat,A., Chanama,S., Sangkijporn,S., Klungthong,C., Thaisomboonsuk,B., Nisalak,A., Gibbons,R., Iamsirithaworn,S.,…	2021-04-22 21:00:00	02478/01	Dengue virus	Flavivirus	Flaviviridae	ssRNA(+)	10179	GenBank	partial		Thailand	Thailand	Homo sapiens		2001-01-01	Dengue virus type I isolate 02478/01 polyprotein (POLY) gene, complete cds
MW946248	Katzelnick,L., Escoto,A., Huang,A., Garcia-Carreras,B., Chowdhury,N., Berry,I., Chavez,C., Rutvisuttinunt,W., Buchy,P., Duong,V., Dussart,P., Gromowski,G., Macareo,L., Smith,D., Jarman,R., Whitehead,S., Salje,H., Cummings,D., Lessler,J., Melendrez,M., Endy,T., Kalanarooj,S., A-Nuegoonpipat,A., Chanama,S., Sangkijporn,S., Klungthong,C., Thaisomboonsuk,B., Nisalak,A., Gibbons,R., Iamsirithaworn,S.,…	2021-04-22 21:00:00	01145/06	Dengue virus	Flavivirus	Flaviviridae	ssRNA(+)	10179	GenBank	partial		Thailand	Thailand	Homo sapiens		2006-01-01	Dengue virus type I isolate 01145/06 polyprotein (POLY) gene, complete cds
MW946247	Katzelnick,L., Escoto,A., Huang,A., Garcia-Carreras,B., Chowdhury,N., Berry,I., Chavez,C., Rutvisuttinunt,W., Buchy,P., Duong,V., Dussart,P., Gromowski,G., Macareo,L., Smith,D., Jarman,R., Whitehead,S., Salje,H., Cummings,D., Lessler,J., Melendrez,M., Endy,T., Kalanarooj,S., A-Nuegoonpipat,A., Chanama,S., Sangkijporn,S., Klungthong,C., Thaisomboonsuk,B., Nisalak,A., Gibbons,R., Iamsirithaworn,S.,…	2021-04-22 21:00:00	03398/97	Dengue virus	Flavivirus	Flaviviridae	ssRNA(+)	10179	GenBank	partial		Thailand	Thailand	Homo sapiens		1997-01-01	Dengue virus type I isolate 03398/97 polyprotein (POLY) gene, complete cds
MW946246	Katzelnick,L., Escoto,A., Huang,A., Garcia-Carreras,B., Chowdhury,N., Berry,I., Chavez,C., Rutvisuttinunt,W., Buchy,P., Duong,V., Dussart,P., Gromowski,G., Macareo,L., Smith,D., Jarman,R., Whitehead,S., Salje,H., Cummings,D., Lessler,J., Melendrez,M., Endy,T., Kalanarooj,S., A-Nuegoonpipat,A., Chanama,S., Sangkijporn,S., Klungthong,C., Thaisomboonsuk,B., Nisalak,A., Gibbons,R., Iamsirithaworn,S.,…	2021-04-22 21:00:00	07423/97	Dengue virus	Flavivirus	Flaviviridae	ssRNA(+)	10179	GenBank	partial		Thailand	Thailand	Homo sapiens		1997-01-01	Dengue virus type I isolate 07423/97 polyprotein (POLY) gene, complete cds
MW946245	Katzelnick,L., Escoto,A., Huang,A., Garcia-Carreras,B., Chowdhury,N., Berry,I., Chavez,C., Rutvisuttinunt,W., Buchy,P., Duong,V., Dussart,P., Gromowski,G., Macareo,L., Smith,D., Jarman,R., Whitehead,S., Salje,H., Cummings,D., Lessler,J., Melendrez,M., Endy,T., Kalanarooj,S., A-Nuegoonpipat,A., Chanama,S., Sangkijporn,S., Klungthong,C., Thaisomboonsuk,B., Nisalak,A., Gibbons,R., Iamsirithaworn,S.,…	2021-04-22 21:00:00	06491/98	Dengue virus	Flavivirus	Flaviviridae	ssRNA(+)	10179	GenBank	partial		Thailand	Thailand	Homo sapiens		1998-01-01	Dengue virus type I isolate 06491/98 polyprotein (POLY) gene, complete cds
MW946244	Katzelnick,L., Escoto,A., Huang,A., Garcia-Carreras,B., Chowdhury,N., Berry,I., Chavez,C., Rutvisuttinunt,W., Buchy,P., Duong,V., Dussart,P., Gromowski,G., Macareo,L., Smith,D., Jarman,R., Whitehead,S., Salje,H., Cummings,D., Lessler,J., Melendrez,M., Endy,T., Kalanarooj,S., A-Nuegoonpipat,A., Chanama,S., Sangkijporn,S., Klungthong,C., Thaisomboonsuk,B., Nisalak,A., Gibbons,R., Iamsirithaworn,S.,…	2021-04-22 21:00:00	01570/13	Dengue virus	Flavivirus	Flaviviridae	ssRNA(+)	10179	GenBank	partial		Thailand	Thailand	Homo sapiens		2013-01-01	Dengue virus type I isolate 01570/13 polyprotein (POLY) gene, complete cds
MW946243	Katzelnick,L., Escoto,A., Huang,A., Garcia-Carreras,B., Chowdhury,N., Berry,I., Chavez,C., Rutvisuttinunt,W., Buchy,P., Duong,V., Dussart,P., Gromowski,G., Macareo,L., Smith,D., Jarman,R., Whitehead,S., Salje,H., Cummings,D., Lessler,J., Melendrez,M., Endy,T., Kalanarooj,S., A-Nuegoonpipat,A., Chanama,S., Sangkijporn,S., Klungthong,C., Thaisomboonsuk,B., Nisalak,A., Gibbons,R., Iamsirithaworn,S.,…	2021-04-22 21:00:00	02913/02	Dengue virus	Flavivirus	Flaviviridae	ssRNA(+)	10179	GenBank	partial		Thailand	Thailand	Homo sapiens		2002-01-01	Dengue virus type I isolate 02913/02 polyprotein (POLY) gene, complete cds
MW946242	Katzelnick,L., Escoto,A., Huang,A., Garcia-Carreras,B., Chowdhury,N., Berry,I., Chavez,C., Rutvisuttinunt,W., Buchy,P., Duong,V., Dussart,P., Gromowski,G., Macareo,L., Smith,D., Jarman,R., Whitehead,S., Salje,H., Cummings,D., Lessler,J., Melendrez,M., Endy,T., Kalanarooj,S., A-Nuegoonpipat,A., Chanama,S., Sangkijporn,S., Klungthong,C., Thaisomboonsuk,B., Nisalak,A., Gibbons,R., Iamsirithaworn,S.,…	2021-04-22 21:00:00	01031/13	Dengue virus	Flavivirus	Flaviviridae	ssRNA(+)	10179	GenBank	partial		Thailand	Thailand	Homo sapiens		2013-01-01	Dengue virus type I isolate 01031/13 polyprotein (POLY) gene, complete cds
MW946241	Katzelnick,L., Escoto,A., Huang,A., Garcia-Carreras,B., Chowdhury,N., Berry,I., Chavez,C., Rutvisuttinunt,W., Buchy,P., Duong,V., Dussart,P., Gromowski,G., Macareo,L., Smith,D., Jarman,R., Whitehead,S., Salje,H., Cummings,D., Lessler,J., Melendrez,M., Endy,T., Kalanarooj,S., A-Nuegoonpipat,A., Chanama,S., Sangkijporn,S., Klungthong,C., Thaisomboonsuk,B., Nisalak,A., Gibbons,R., Iamsirithaworn,S.,…	2021-04-22 21:00:00	02452/96	Dengue virus	Flavivirus	Flaviviridae	ssRNA(+)	10179	GenBank	partial		Thailand	Thailand	Homo sapiens		1996-01-01	Dengue virus type I isolate 02452/96 polyprotein (POLY) gene, complete cds
MW946240	Katzelnick,L., Escoto,A., Huang,A., Garcia-Carreras,B., Chowdhury,N., Berry,I., Chavez,C., Rutvisuttinunt,W., Buchy,P., Duong,V., Dussart,P., Gromowski,G., Macareo,L., Smith,D., Jarman,R., Whitehead,S., Salje,H., Cummings,D., Lessler,J., Melendrez,M., Endy,T., Kalanarooj,S., A-Nuegoonpipat,A., Chanama,S., Sangkijporn,S., Klungthong,C., Thaisomboonsuk,B., Nisalak,A., Gibbons,R., Iamsirithaworn,S.,…	2021-04-22 21:00:00	00297/13	Dengue virus	Flavivirus	Flaviviridae	ssRNA(+)	10179	GenBank	partial		Thailand	Thailand	Homo sapiens		2013-01-01	Dengue virus type I isolate 00297/13 polyprotein (POLY) gene, complete cds
MW946239	Katzelnick,L., Escoto,A., Huang,A., Garcia-Carreras,B., Chowdhury,N., Berry,I., Chavez,C., Rutvisuttinunt,W., Buchy,P., Duong,V., Dussart,P., Gromowski,G., Macareo,L., Smith,D., Jarman,R., Whitehead,S., Salje,H., Cummings,D., Lessler,J., Melendrez,M., Endy,T., Kalanarooj,S., A-Nuegoonpipat,A., Chanama,S., Sangkijporn,S., Klungthong,C., Thaisomboonsuk,B., Nisalak,A., Gibbons,R., Iamsirithaworn,S.,…	2021-04-22 21:00:00	03410/99	Dengue virus	Flavivirus	Flaviviridae	ssRNA(+)	10179	GenBank	partial		Thailand	Thailand	Homo sapiens		1999-01-01	Dengue virus type I isolate 03410/99 polyprotein (POLY) gene, complete cds
MW946238	Katzelnick,L., Escoto,A., Huang,A., Garcia-Carreras,B., Chowdhury,N., Berry,I., Chavez,C., Rutvisuttinunt,W., Buchy,P., Duong,V., Dussart,P., Gromowski,G., Macareo,L., Smith,D., Jarman,R., Whitehead,S., Salje,H., Cummings,D., Lessler,J., Melendrez,M., Endy,T., Kalanarooj,S., A-Nuegoonpipat,A., Chanama,S., Sangkijporn,S., Klungthong,C., Thaisomboonsuk,B., Nisalak,A., Gibbons,R., Iamsirithaworn,S.,…	2021-04-22 21:00:00	00738/14	Dengue virus	Flavivirus	Flaviviridae	ssRNA(+)	10179	GenBank	partial		Thailand	Thailand	Homo sapiens		2014-01-01	Dengue virus type I isolate 00738/14 polyprotein (POLY) gene, complete cds
MW946237	Katzelnick,L., Escoto,A., Huang,A., Garcia-Carreras,B., Chowdhury,N., Berry,I., Chavez,C., Rutvisuttinunt,W., Buchy,P., Duong,V., Dussart,P., Gromowski,G., Macareo,L., Smith,D., Jarman,R., Whitehead,S., Salje,H., Cummings,D., Lessler,J., Melendrez,M., Endy,T., Kalanarooj,S., A-Nuegoonpipat,A., Chanama,S., Sangkijporn,S., Klungthong,C., Thaisomboonsuk,B., Nisalak,A., Gibbons,R., Iamsirithaworn,S.,…	2021-04-22 21:00:00	00532/04	Dengue virus	Flavivirus	Flaviviridae	ssRNA(+)	10179	GenBank	partial		Thailand	Thailand	Homo sapiens		2004-01-01	Dengue virus type I isolate 00532/04 polyprotein (POLY) gene, complete cds
MW946236	Katzelnick,L., Escoto,A., Huang,A., Garcia-Carreras,B., Chowdhury,N., Berry,I., Chavez,C., Rutvisuttinunt,W., Buchy,P., Duong,V., Dussart,P., Gromowski,G., Macareo,L., Smith,D., Jarman,R., Whitehead,S., Salje,H., Cummings,D., Lessler,J., Melendrez,M., Endy,T., Kalanarooj,S., A-Nuegoonpipat,A., Chanama,S., Sangkijporn,S., Klungthong,C., Thaisomboonsuk,B., Nisalak,A., Gibbons,R., Iamsirithaworn,S.,…	2021-04-22 21:00:00	03878/01	Dengue virus	Flavivirus	Flaviviridae	ssRNA(+)	10179	GenBank	partial		Thailand	Thailand	Homo sapiens		2001-01-01	Dengue virus type I isolate 03878/01 polyprotein (POLY) gene, complete cds
MW946235	Katzelnick,L., Escoto,A., Huang,A., Garcia-Carreras,B., Chowdhury,N., Berry,I., Chavez,C., Rutvisuttinunt,W., Buchy,P., Duong,V., Dussart,P., Gromowski,G., Macareo,L., Smith,D., Jarman,R., Whitehead,S., Salje,H., Cummings,D., Lessler,J., Melendrez,M., Endy,T., Kalanarooj,S., A-Nuegoonpipat,A., Chanama,S., Sangkijporn,S., Klungthong,C., Thaisomboonsuk,B., Nisalak,A., Gibbons,R., Iamsirithaworn,S.,…	2021-04-22 21:00:00	00494/01	Dengue virus	Flavivirus	Flaviviridae	ssRNA(+)	10179	GenBank	partial		Thailand	Thailand	Homo sapiens		2001-01-01	Dengue virus type I isolate 00494/01 polyprotein (POLY) gene, complete cds
MW946234	Katzelnick,L., Escoto,A., Huang,A., Garcia-Carreras,B., Chowdhury,N., Berry,I., Chavez,C., Rutvisuttinunt,W., Buchy,P., Duong,V., Dussart,P., Gromowski,G., Macareo,L., Smith,D., Jarman,R., Whitehead,S., Salje,H., Cummings,D., Lessler,J., Melendrez,M., Endy,T., Kalanarooj,S., A-Nuegoonpipat,A., Chanama,S., Sangkijporn,S., Klungthong,C., Thaisomboonsuk,B., Nisalak,A., Gibbons,R., Iamsirithaworn,S.,…	2021-04-22 21:00:00	02110/02	Dengue virus	Flavivirus	Flaviviridae	ssRNA(+)	10179	GenBank	partial		Thailand	Thailand	Homo sapiens		2002-01-01	Dengue virus type I isolate 02110/02 polyprotein (POLY) gene, complete cds
MW946233	Katzelnick,L., Escoto,A., Huang,A., Garcia-Carreras,B., Chowdhury,N., Berry,I., Chavez,C., Rutvisuttinunt,W., Buchy,P., Duong,V., Dussart,P., Gromowski,G., Macareo,L., Smith,D., Jarman,R., Whitehead,S., Salje,H., Cummings,D., Lessler,J., Melendrez,M., Endy,T., Kalanarooj,S., A-Nuegoonpipat,A., Chanama,S., Sangkijporn,S., Klungthong,C., Thaisomboonsuk,B., Nisalak,A., Gibbons,R., Iamsirithaworn,S.,…	2021-04-22 21:00:00	00046/11	Dengue virus	Flavivirus	Flaviviridae	ssRNA(+)	10179	GenBank	partial		Thailand	Thailand	Homo sapiens		2011-01-01	Dengue virus type I isolate 00046/11 polyprotein (POLY) gene, complete cds
MW946232	Katzelnick,L., Escoto,A., Huang,A., Garcia-Carreras,B., Chowdhury,N., Berry,I., Chavez,C., Rutvisuttinunt,W., Buchy,P., Duong,V., Dussart,P., Gromowski,G., Macareo,L., Smith,D., Jarman,R., Whitehead,S., Salje,H., Cummings,D., Lessler,J., Melendrez,M., Endy,T., Kalanarooj,S., A-Nuegoonpipat,A., Chanama,S., Sangkijporn,S., Klungthong,C., Thaisomboonsuk,B., Nisalak,A., Gibbons,R., Iamsirithaworn,S.,…	2021-04-22 21:00:00	00785/11	Dengue virus	Flavivirus	Flaviviridae	ssRNA(+)	10179	GenBank	partial		Thailand	Thailand	Homo sapiens		2011-01-01	Dengue virus type I isolate 00785/11 polyprotein (POLY) gene, complete cds
MW946231	Katzelnick,L., Escoto,A., Huang,A., Garcia-Carreras,B., Chowdhury,N., Berry,I., Chavez,C., Rutvisuttinunt,W., Buchy,P., Duong,V., Dussart,P., Gromowski,G., Macareo,L., Smith,D., Jarman,R., Whitehead,S., Salje,H., Cummings,D., Lessler,J., Melendrez,M., Endy,T., Kalanarooj,S., A-Nuegoonpipat,A., Chanama,S., Sangkijporn,S., Klungthong,C., Thaisomboonsuk,B., Nisalak,A., Gibbons,R., Iamsirithaworn,S.,…	2021-04-22 21:00:00	00617/05	Dengue virus	Flavivirus	Flaviviridae	ssRNA(+)	10179	GenBank	partial		Thailand	Thailand	Homo sapiens		2005-01-01	Dengue virus type I isolate 00617/05 polyprotein (POLY) gene, complete cds
MW946230	Katzelnick,L., Escoto,A., Huang,A., Garcia-Carreras,B., Chowdhury,N., Berry,I., Chavez,C., Rutvisuttinunt,W., Buchy,P., Duong,V., Dussart,P., Gromowski,G., Macareo,L., Smith,D., Jarman,R., Whitehead,S., Salje,H., Cummings,D., Lessler,J., Melendrez,M., Endy,T., Kalanarooj,S., A-Nuegoonpipat,A., Chanama,S., Sangkijporn,S., Klungthong,C., Thaisomboonsuk,B., Nisalak,A., Gibbons,R., Iamsirithaworn,S.,…	2021-04-22 21:00:00	30103/95	Dengue virus	Flavivirus	Flaviviridae	ssRNA(+)	10179	GenBank	partial		Thailand	Thailand	Homo sapiens		1995-01-01	Dengue virus type I isolate 30103/95 polyprotein (POLY) gene, complete cds
MW946229	Katzelnick,L., Escoto,A., Huang,A., Garcia-Carreras,B., Chowdhury,N., Berry,I., Chavez,C., Rutvisuttinunt,W., Buchy,P., Duong,V., Dussart,P., Gromowski,G., Macareo,L., Smith,D., Jarman,R., Whitehead,S., Salje,H., Cummings,D., Lessler,J., Melendrez,M., Endy,T., Kalanarooj,S., A-Nuegoonpipat,A., Chanama,S., Sangkijporn,S., Klungthong,C., Thaisomboonsuk,B., Nisalak,A., Gibbons,R., Iamsirithaworn,S.,…	2021-04-22 21:00:00	02129/06	Dengue virus	Flavivirus	Flaviviridae	ssRNA(+)	10179	GenBank	partial		Thailand	Thailand	Homo sapiens		2006-01-01	Dengue virus type I isolate 02129/06 polyprotein (POLY) gene, complete cds
MW946228	Katzelnick,L., Escoto,A., Huang,A., Garcia-Carreras,B., Chowdhury,N., Berry,I., Chavez,C., Rutvisuttinunt,W., Buchy,P., Duong,V., Dussart,P., Gromowski,G., Macareo,L., Smith,D., Jarman,R., Whitehead,S., Salje,H., Cummings,D., Lessler,J., Melendrez,M., Endy,T., Kalanarooj,S., A-Nuegoonpipat,A., Chanama,S., Sangkijporn,S., Klungthong,C., Thaisomboonsuk,B., Nisalak,A., Gibbons,R., Iamsirithaworn,S.,…	2021-04-22 21:00:00	01302/11	Dengue virus	Flavivirus	Flaviviridae	ssRNA(+)	10179	GenBank	partial		Thailand	Thailand	Homo sapiens		2011-01-01	Dengue virus type I isolate 01302/11 polyprotein (POLY) gene, complete cds
MW946227	Katzelnick,L., Escoto,A., Huang,A., Garcia-Carreras,B., Chowdhury,N., Berry,I., Chavez,C., Rutvisuttinunt,W., Buchy,P., Duong,V., Dussart,P., Gromowski,G., Macareo,L., Smith,D., Jarman,R., Whitehead,S., Salje,H., Cummings,D., Lessler,J., Melendrez,M., Endy,T., Kalanarooj,S., A-Nuegoonpipat,A., Chanama,S., Sangkijporn,S., Klungthong,C., Thaisomboonsuk,B., Nisalak,A., Gibbons,R., Iamsirithaworn,S.,…	2021-04-22 21:00:00	01893/02	Dengue virus	Flavivirus	Flaviviridae	ssRNA(+)	10179	GenBank	partial		Thailand	Thailand	Homo sapiens		2002-01-01	Dengue virus type I isolate 01893/02 polyprotein (POLY) gene, complete cds
MW946226	Katzelnick,L., Escoto,A., Huang,A., Garcia-Carreras,B., Chowdhury,N., Berry,I., Chavez,C., Rutvisuttinunt,W., Buchy,P., Duong,V., Dussart,P., Gromowski,G., Macareo,L., Smith,D., Jarman,R., Whitehead,S., Salje,H., Cummings,D., Lessler,J., Melendrez,M., Endy,T., Kalanarooj,S., A-Nuegoonpipat,A., Chanama,S., Sangkijporn,S., Klungthong,C., Thaisomboonsuk,B., Nisalak,A., Gibbons,R., Iamsirithaworn,S.,…	2021-04-22 21:00:00	00592/98	Dengue virus	Flavivirus	Flaviviridae	ssRNA(+)	10179	GenBank	partial		Thailand	Thailand	Homo sapiens		1998-01-01	Dengue virus type I isolate 00592/98 polyprotein (POLY) gene, complete cds
MW946225	Katzelnick,L., Escoto,A., Huang,A., Garcia-Carreras,B., Chowdhury,N., Berry,I., Chavez,C., Rutvisuttinunt,W., Buchy,P., Duong,V., Dussart,P., Gromowski,G., Macareo,L., Smith,D., Jarman,R., Whitehead,S., Salje,H., Cummings,D., Lessler,J., Melendrez,M., Endy,T., Kalanarooj,S., A-Nuegoonpipat,A., Chanama,S., Sangkijporn,S., Klungthong,C., Thaisomboonsuk,B., Nisalak,A., Gibbons,R., Iamsirithaworn,S.,…	2021-04-22 21:00:00	01057/97	Dengue virus	Flavivirus	Flaviviridae	ssRNA(+)	10179	GenBank	partial		Thailand	Thailand	Homo sapiens		1997-01-01	Dengue virus type I isolate 01057/97 polyprotein (POLY) gene, complete cds
MW946224	Katzelnick,L., Escoto,A., Huang,A., Garcia-Carreras,B., Chowdhury,N., Berry,I., Chavez,C., Rutvisuttinunt,W., Buchy,P., Duong,V., Dussart,P., Gromowski,G., Macareo,L., Smith,D., Jarman,R., Whitehead,S., Salje,H., Cummings,D., Lessler,J., Melendrez,M., Endy,T., Kalanarooj,S., A-Nuegoonpipat,A., Chanama,S., Sangkijporn,S., Klungthong,C., Thaisomboonsuk,B., Nisalak,A., Gibbons,R., Iamsirithaworn,S.,…	2021-04-22 21:00:00	01476/94	Dengue virus	Flavivirus	Flaviviridae	ssRNA(+)	10179	GenBank	partial		Thailand	Thailand	Homo sapiens		1994-01-01	Dengue virus type I isolate 01476/94 polyprotein (POLY) gene, complete cds
MW946223	Katzelnick,L., Escoto,A., Huang,A., Garcia-Carreras,B., Chowdhury,N., Berry,I., Chavez,C., Rutvisuttinunt,W., Buchy,P., Duong,V., Dussart,P., Gromowski,G., Macareo,L., Smith,D., Jarman,R., Whitehead,S., Salje,H., Cummings,D., Lessler,J., Melendrez,M., Endy,T., Kalanarooj,S., A-Nuegoonpipat,A., Chanama,S., Sangkijporn,S., Klungthong,C., Thaisomboonsuk,B., Nisalak,A., Gibbons,R., Iamsirithaworn,S.,…	2021-04-22 21:00:00	00349/03	Dengue virus	Flavivirus	Flaviviridae	ssRNA(+)	10179	GenBank	partial		Thailand	Thailand	Homo sapiens		2003-01-01	Dengue virus type I isolate 00349/03 polyprotein (POLY) gene, complete cds
MW946222	Katzelnick,L., Escoto,A., Huang,A., Garcia-Carreras,B., Chowdhury,N., Berry,I., Chavez,C., Rutvisuttinunt,W., Buchy,P., Duong,V., Dussart,P., Gromowski,G., Macareo,L., Smith,D., Jarman,R., Whitehead,S., Salje,H., Cummings,D., Lessler,J., Melendrez,M., Endy,T., Kalanarooj,S., A-Nuegoonpipat,A., Chanama,S., Sangkijporn,S., Klungthong,C., Thaisomboonsuk,B., Nisalak,A., Gibbons,R., Iamsirithaworn,S.,…	2021-04-22 21:00:00	01510/10	Dengue virus	Flavivirus	Flaviviridae	ssRNA(+)	10179	GenBank	partial		Thailand	Thailand	Homo sapiens		2010-01-01	Dengue virus type I isolate 01510/10 polyprotein (POLY) gene, complete cds
MW946221	Katzelnick,L., Escoto,A., Huang,A., Garcia-Carreras,B., Chowdhury,N., Berry,I., Chavez,C., Rutvisuttinunt,W., Buchy,P., Duong,V., Dussart,P., Gromowski,G., Macareo,L., Smith,D., Jarman,R., Whitehead,S., Salje,H., Cummings,D., Lessler,J., Melendrez,M., Endy,T., Kalanarooj,S., A-Nuegoonpipat,A., Chanama,S., Sangkijporn,S., Klungthong,C., Thaisomboonsuk,B., Nisalak,A., Gibbons,R., Iamsirithaworn,S.,…	2021-04-22 21:00:00	01380/06	Dengue virus	Flavivirus	Flaviviridae	ssRNA(+)	10179	GenBank	partial		Thailand	Thailand	Homo sapiens		2006-01-01	Dengue virus type I isolate 01380/06 polyprotein (POLY) gene, complete cds
MW946220	Katzelnick,L., Escoto,A., Huang,A., Garcia-Carreras,B., Chowdhury,N., Berry,I., Chavez,C., Rutvisuttinunt,W., Buchy,P., Duong,V., Dussart,P., Gromowski,G., Macareo,L., Smith,D., Jarman,R., Whitehead,S., Salje,H., Cummings,D., Lessler,J., Melendrez,M., Endy,T., Kalanarooj,S., A-Nuegoonpipat,A., Chanama,S., Sangkijporn,S., Klungthong,C., Thaisomboonsuk,B., Nisalak,A., Gibbons,R., Iamsirithaworn,S.,…	2021-04-22 21:00:00	00395/94	Dengue virus	Flavivirus	Flaviviridae	ssRNA(+)	10179	GenBank	partial		Thailand	Thailand	Homo sapiens		1994-01-01	Dengue virus type I isolate 00395/94 polyprotein (POLY) gene, complete cds
MW946219	Katzelnick,L., Escoto,A., Huang,A., Garcia-Carreras,B., Chowdhury,N., Berry,I., Chavez,C., Rutvisuttinunt,W., Buchy,P., Duong,V., Dussart,P., Gromowski,G., Macareo,L., Smith,D., Jarman,R., Whitehead,S., Salje,H., Cummings,D., Lessler,J., Melendrez,M., Endy,T., Kalanarooj,S., A-Nuegoonpipat,A., Chanama,S., Sangkijporn,S., Klungthong,C., Thaisomboonsuk,B., Nisalak,A., Gibbons,R., Iamsirithaworn,S.,…	2021-04-22 21:00:00	01565/00	Dengue virus	Flavivirus	Flaviviridae	ssRNA(+)	10179	GenBank	partial		Thailand	Thailand	Homo sapiens		2000-01-01	Dengue virus type I isolate 01565/00 polyprotein (POLY) gene, complete cds
MW946218	Katzelnick,L., Escoto,A., Huang,A., Garcia-Carreras,B., Chowdhury,N., Berry,I., Chavez,C., Rutvisuttinunt,W., Buchy,P., Duong,V., Dussart,P., Gromowski,G., Macareo,L., Smith,D., Jarman,R., Whitehead,S., Salje,H., Cummings,D., Lessler,J., Melendrez,M., Endy,T., Kalanarooj,S., A-Nuegoonpipat,A., Chanama,S., Sangkijporn,S., Klungthong,C., Thaisomboonsuk,B., Nisalak,A., Gibbons,R., Iamsirithaworn,S.,…	2021-04-22 21:00:00	01518/10	Dengue virus	Flavivirus	Flaviviridae	ssRNA(+)	10179	GenBank	partial		Thailand	Thailand	Homo sapiens		2010-01-01	Dengue virus type I isolate 01518/10 polyprotein (POLY) gene, complete cds
MW946217	Katzelnick,L., Escoto,A., Huang,A., Garcia-Carreras,B., Chowdhury,N., Berry,I., Chavez,C., Rutvisuttinunt,W., Buchy,P., Duong,V., Dussart,P., Gromowski,G., Macareo,L., Smith,D., Jarman,R., Whitehead,S., Salje,H., Cummings,D., Lessler,J., Melendrez,M., Endy,T., Kalanarooj,S., A-Nuegoonpipat,A., Chanama,S., Sangkijporn,S., Klungthong,C., Thaisomboonsuk,B., Nisalak,A., Gibbons,R., Iamsirithaworn,S.,…	2021-04-22 21:00:00	00330/11	Dengue virus	Flavivirus	Flaviviridae	ssRNA(+)	10179	GenBank	partial		Thailand	Thailand	Homo sapiens		2011-01-01	Dengue virus type I isolate 00330/11 polyprotein (POLY) gene, complete cds
MW946216	Katzelnick,L., Escoto,A., Huang,A., Garcia-Carreras,B., Chowdhury,N., Berry,I., Chavez,C., Rutvisuttinunt,W., Buchy,P., Duong,V., Dussart,P., Gromowski,G., Macareo,L., Smith,D., Jarman,R., Whitehead,S., Salje,H., Cummings,D., Lessler,J., Melendrez,M., Endy,T., Kalanarooj,S., A-Nuegoonpipat,A., Chanama,S., Sangkijporn,S., Klungthong,C., Thaisomboonsuk,B., Nisalak,A., Gibbons,R., Iamsirithaworn,S.,…	2021-04-22 21:00:00	00208/05	Dengue virus	Flavivirus	Flaviviridae	ssRNA(+)	10179	GenBank	partial		Thailand	Thailand	Homo sapiens		2005-01-01	Dengue virus type I isolate 00208/05 polyprotein (POLY) gene, complete cds
MW946215	Katzelnick,L., Escoto,A., Huang,A., Garcia-Carreras,B., Chowdhury,N., Berry,I., Chavez,C., Rutvisuttinunt,W., Buchy,P., Duong,V., Dussart,P., Gromowski,G., Macareo,L., Smith,D., Jarman,R., Whitehead,S., Salje,H., Cummings,D., Lessler,J., Melendrez,M., Endy,T., Kalanarooj,S., A-Nuegoonpipat,A., Chanama,S., Sangkijporn,S., Klungthong,C., Thaisomboonsuk,B., Nisalak,A., Gibbons,R., Iamsirithaworn,S.,…	2021-04-22 21:00:00	01535/06	Dengue virus	Flavivirus	Flaviviridae	ssRNA(+)	10179	GenBank	partial		Thailand	Thailand	Homo sapiens		2006-01-01	Dengue virus type I isolate 01535/06 polyprotein (POLY) gene, complete cds
MW946214	Katzelnick,L., Escoto,A., Huang,A., Garcia-Carreras,B., Chowdhury,N., Berry,I., Chavez,C., Rutvisuttinunt,W., Buchy,P., Duong,V., Dussart,P., Gromowski,G., Macareo,L., Smith,D., Jarman,R., Whitehead,S., Salje,H., Cummings,D., Lessler,J., Melendrez,M., Endy,T., Kalanarooj,S., A-Nuegoonpipat,A., Chanama,S., Sangkijporn,S., Klungthong,C., Thaisomboonsuk,B., Nisalak,A., Gibbons,R., Iamsirithaworn,S.,…	2021-04-22 21:00:00	02185/96	Dengue virus	Flavivirus	Flaviviridae	ssRNA(+)	10179	GenBank	partial		Thailand	Thailand	Homo sapiens		1996-01-01	Dengue virus type I isolate 02185/96 polyprotein (POLY) gene, complete cds
MW946213	Katzelnick,L., Escoto,A., Huang,A., Garcia-Carreras,B., Chowdhury,N., Berry,I., Chavez,C., Rutvisuttinunt,W., Buchy,P., Duong,V., Dussart,P., Gromowski,G., Macareo,L., Smith,D., Jarman,R., Whitehead,S., Salje,H., Cummings,D., Lessler,J., Melendrez,M., Endy,T., Kalanarooj,S., A-Nuegoonpipat,A., Chanama,S., Sangkijporn,S., Klungthong,C., Thaisomboonsuk,B., Nisalak,A., Gibbons,R., Iamsirithaworn,S.,…	2021-04-22 21:00:00	02817/06	Dengue virus	Flavivirus	Flaviviridae	ssRNA(+)	10179	GenBank	partial		Thailand	Thailand	Homo sapiens		2006-01-01	Dengue virus type I isolate 02817/06 polyprotein (POLY) gene, complete cds
MW946212	Katzelnick,L., Escoto,A., Huang,A., Garcia-Carreras,B., Chowdhury,N., Berry,I., Chavez,C., Rutvisuttinunt,W., Buchy,P., Duong,V., Dussart,P., Gromowski,G., Macareo,L., Smith,D., Jarman,R., Whitehead,S., Salje,H., Cummings,D., Lessler,J., Melendrez,M., Endy,T., Kalanarooj,S., A-Nuegoonpipat,A., Chanama,S., Sangkijporn,S., Klungthong,C., Thaisomboonsuk,B., Nisalak,A., Gibbons,R., Iamsirithaworn,S.,…	2021-04-22 21:00:00	00350/94	Dengue virus	Flavivirus	Flaviviridae	ssRNA(+)	10179	GenBank	partial		Thailand	Thailand	Homo sapiens		1994-01-01	Dengue virus type I isolate 00350/94 polyprotein (POLY) gene, complete cds
MW946211	Katzelnick,L., Escoto,A., Huang,A., Garcia-Carreras,B., Chowdhury,N., Berry,I., Chavez,C., Rutvisuttinunt,W., Buchy,P., Duong,V., Dussart,P., Gromowski,G., Macareo,L., Smith,D., Jarman,R., Whitehead,S., Salje,H., Cummings,D., Lessler,J., Melendrez,M., Endy,T., Kalanarooj,S., A-Nuegoonpipat,A., Chanama,S., Sangkijporn,S., Klungthong,C., Thaisomboonsuk,B., Nisalak,A., Gibbons,R., Iamsirithaworn,S.,…	2021-04-22 21:00:00	01555/03	Dengue virus	Flavivirus	Flaviviridae	ssRNA(+)	10179	GenBank	partial		Thailand	Thailand	Homo sapiens		2003-01-01	Dengue virus type I isolate 01555/03 polyprotein (POLY) gene, complete cds
MW946210	Katzelnick,L., Escoto,A., Huang,A., Garcia-Carreras,B., Chowdhury,N., Berry,I., Chavez,C., Rutvisuttinunt,W., Buchy,P., Duong,V., Dussart,P., Gromowski,G., Macareo,L., Smith,D., Jarman,R., Whitehead,S., Salje,H., Cummings,D., Lessler,J., Melendrez,M., Endy,T., Kalanarooj,S., A-Nuegoonpipat,A., Chanama,S., Sangkijporn,S., Klungthong,C., Thaisomboonsuk,B., Nisalak,A., Gibbons,R., Iamsirithaworn,S.,…	2021-04-22 21:00:00	00487/95	Dengue virus	Flavivirus	Flaviviridae	ssRNA(+)	10179	GenBank	partial		Thailand	Thailand	Homo sapiens		1995-01-01	Dengue virus type I isolate 00487/95 polyprotein (POLY) gene, complete cds
MW946209	Katzelnick,L., Escoto,A., Huang,A., Garcia-Carreras,B., Chowdhury,N., Berry,I., Chavez,C., Rutvisuttinunt,W., Buchy,P., Duong,V., Dussart,P., Gromowski,G., Macareo,L., Smith,D., Jarman,R., Whitehead,S., Salje,H., Cummings,D., Lessler,J., Melendrez,M., Endy,T., Kalanarooj,S., A-Nuegoonpipat,A., Chanama,S., Sangkijporn,S., Klungthong,C., Thaisomboonsuk,B., Nisalak,A., Gibbons,R., Iamsirithaworn,S.,…	2021-04-22 21:00:00	00365/99	Dengue virus	Flavivirus	Flaviviridae	ssRNA(+)	10179	GenBank	partial		Thailand	Thailand	Homo sapiens		1999-01-01	Dengue virus type I isolate 00365/99 polyprotein (POLY) gene, complete cds
MW946208	Katzelnick,L., Escoto,A., Huang,A., Garcia-Carreras,B., Chowdhury,N., Berry,I., Chavez,C., Rutvisuttinunt,W., Buchy,P., Duong,V., Dussart,P., Gromowski,G., Macareo,L., Smith,D., Jarman,R., Whitehead,S., Salje,H., Cummings,D., Lessler,J., Melendrez,M., Endy,T., Kalanarooj,S., A-Nuegoonpipat,A., Chanama,S., Sangkijporn,S., Klungthong,C., Thaisomboonsuk,B., Nisalak,A., Gibbons,R., Iamsirithaworn,S.,…	2021-04-22 21:00:00	00270/13	Dengue virus	Flavivirus	Flaviviridae	ssRNA(+)	10179	GenBank	partial		Thailand	Thailand	Homo sapiens		2013-01-01	Dengue virus type I isolate 00270/13 polyprotein (POLY) gene, complete cds
MW946207	Katzelnick,L., Escoto,A., Huang,A., Garcia-Carreras,B., Chowdhury,N., Berry,I., Chavez,C., Rutvisuttinunt,W., Buchy,P., Duong,V., Dussart,P., Gromowski,G., Macareo,L., Smith,D., Jarman,R., Whitehead,S., Salje,H., Cummings,D., Lessler,J., Melendrez,M., Endy,T., Kalanarooj,S., A-Nuegoonpipat,A., Chanama,S., Sangkijporn,S., Klungthong,C., Thaisomboonsuk,B., Nisalak,A., Gibbons,R., Iamsirithaworn,S.,…	2021-04-22 21:00:00	01909/00	Dengue virus	Flavivirus	Flaviviridae	ssRNA(+)	10179	GenBank	partial		Thailand	Thailand	Homo sapiens		2000-01-01	Dengue virus type I isolate 01909/00 polyprotein (POLY) gene, complete cds
MW946206	Katzelnick,L., Escoto,A., Huang,A., Garcia-Carreras,B., Chowdhury,N., Berry,I., Chavez,C., Rutvisuttinunt,W., Buchy,P., Duong,V., Dussart,P., Gromowski,G., Macareo,L., Smith,D., Jarman,R., Whitehead,S., Salje,H., Cummings,D., Lessler,J., Melendrez,M., Endy,T., Kalanarooj,S., A-Nuegoonpipat,A., Chanama,S., Sangkijporn,S., Klungthong,C., Thaisomboonsuk,B., Nisalak,A., Gibbons,R., Iamsirithaworn,S.,…	2021-04-22 21:00:00	03805/99	Dengue virus	Flavivirus	Flaviviridae	ssRNA(+)	10179	GenBank	partial		Thailand	Thailand	Homo sapiens		1999-01-01	Dengue virus type I isolate 03805/99 polyprotein (POLY) gene, complete cds
MW946205	Katzelnick,L., Escoto,A., Huang,A., Garcia-Carreras,B., Chowdhury,N., Berry,I., Chavez,C., Rutvisuttinunt,W., Buchy,P., Duong,V., Dussart,P., Gromowski,G., Macareo,L., Smith,D., Jarman,R., Whitehead,S., Salje,H., Cummings,D., Lessler,J., Melendrez,M., Endy,T., Kalanarooj,S., A-Nuegoonpipat,A., Chanama,S., Sangkijporn,S., Klungthong,C., Thaisomboonsuk,B., Nisalak,A., Gibbons,R., Iamsirithaworn,S.,…	2021-04-22 21:00:00	01060/13	Dengue virus	Flavivirus	Flaviviridae	ssRNA(+)	10179	GenBank	partial		Thailand	Thailand	Homo sapiens		2013-01-01	Dengue virus type I isolate 01060/13 polyprotein (POLY) gene, complete cds
MW946204	Katzelnick,L., Escoto,A., Huang,A., Garcia-Carreras,B., Chowdhury,N., Berry,I., Chavez,C., Rutvisuttinunt,W., Buchy,P., Duong,V., Dussart,P., Gromowski,G., Macareo,L., Smith,D., Jarman,R., Whitehead,S., Salje,H., Cummings,D., Lessler,J., Melendrez,M., Endy,T., Kalanarooj,S., A-Nuegoonpipat,A., Chanama,S., Sangkijporn,S., Klungthong,C., Thaisomboonsuk,B., Nisalak,A., Gibbons,R., Iamsirithaworn,S.,…	2021-04-22 21:00:00	01813/02	Dengue virus	Flavivirus	Flaviviridae	ssRNA(+)	10179	GenBank	partial		Thailand	Thailand	Homo sapiens		2002-01-01	Dengue virus type I isolate 01813/02 polyprotein (POLY) gene, complete cds
MW946203	Katzelnick,L., Escoto,A., Huang,A., Garcia-Carreras,B., Chowdhury,N., Berry,I., Chavez,C., Rutvisuttinunt,W., Buchy,P., Duong,V., Dussart,P., Gromowski,G., Macareo,L., Smith,D., Jarman,R., Whitehead,S., Salje,H., Cummings,D., Lessler,J., Melendrez,M., Endy,T., Kalanarooj,S., A-Nuegoonpipat,A., Chanama,S., Sangkijporn,S., Klungthong,C., Thaisomboonsuk,B., Nisalak,A., Gibbons,R., Iamsirithaworn,S.,…	2021-04-22 21:00:00	00595/95	Dengue virus	Flavivirus	Flaviviridae	ssRNA(+)	10179	GenBank	partial		Thailand	Thailand	Homo sapiens		1995-01-01	Dengue virus type I isolate 00595/95 polyprotein (POLY) gene, complete cds
MW946202	Katzelnick,L., Escoto,A., Huang,A., Garcia-Carreras,B., Chowdhury,N., Berry,I., Chavez,C., Rutvisuttinunt,W., Buchy,P., Duong,V., Dussart,P., Gromowski,G., Macareo,L., Smith,D., Jarman,R., Whitehead,S., Salje,H., Cummings,D., Lessler,J., Melendrez,M., Endy,T., Kalanarooj,S., A-Nuegoonpipat,A., Chanama,S., Sangkijporn,S., Klungthong,C., Thaisomboonsuk,B., Nisalak,A., Gibbons,R., Iamsirithaworn,S.,…	2021-04-22 21:00:00	30797/94	Dengue virus	Flavivirus	Flaviviridae	ssRNA(+)	10179	GenBank	partial		Thailand	Thailand	Homo sapiens		1994-01-01	Dengue virus type I isolate 30797/94 polyprotein (POLY) gene, complete cds
MW946201	Katzelnick,L., Escoto,A., Huang,A., Garcia-Carreras,B., Chowdhury,N., Berry,I., Chavez,C., Rutvisuttinunt,W., Buchy,P., Duong,V., Dussart,P., Gromowski,G., Macareo,L., Smith,D., Jarman,R., Whitehead,S., Salje,H., Cummings,D., Lessler,J., Melendrez,M., Endy,T., Kalanarooj,S., A-Nuegoonpipat,A., Chanama,S., Sangkijporn,S., Klungthong,C., Thaisomboonsuk,B., Nisalak,A., Gibbons,R., Iamsirithaworn,S.,…	2021-04-22 21:00:00	01798/00	Dengue virus	Flavivirus	Flaviviridae	ssRNA(+)	10179	GenBank	partial		Thailand	Thailand	Homo sapiens		2000-01-01	Dengue virus type I isolate 01798/00 polyprotein (POLY) gene, complete cds
MW946200	Katzelnick,L., Escoto,A., Huang,A., Garcia-Carreras,B., Chowdhury,N., Berry,I., Chavez,C., Rutvisuttinunt,W., Buchy,P., Duong,V., Dussart,P., Gromowski,G., Macareo,L., Smith,D., Jarman,R., Whitehead,S., Salje,H., Cummings,D., Lessler,J., Melendrez,M., Endy,T., Kalanarooj,S., A-Nuegoonpipat,A., Chanama,S., Sangkijporn,S., Klungthong,C., Thaisomboonsuk,B., Nisalak,A., Gibbons,R., Iamsirithaworn,S.,…	2021-04-22 21:00:00	01499/06	Dengue virus	Flavivirus	Flaviviridae	ssRNA(+)	10179	GenBank	partial		Thailand	Thailand	Homo sapiens		2006-01-01	Dengue virus type I isolate 01499/06 polyprotein (POLY) gene, complete cds
MW946199	Katzelnick,L., Escoto,A., Huang,A., Garcia-Carreras,B., Chowdhury,N., Berry,I., Chavez,C., Rutvisuttinunt,W., Buchy,P., Duong,V., Dussart,P., Gromowski,G., Macareo,L., Smith,D., Jarman,R., Whitehead,S., Salje,H., Cummings,D., Lessler,J., Melendrez,M., Endy,T., Kalanarooj,S., A-Nuegoonpipat,A., Chanama,S., Sangkijporn,S., Klungthong,C., Thaisomboonsuk,B., Nisalak,A., Gibbons,R., Iamsirithaworn,S.,…	2021-04-22 21:00:00	02089/00	Dengue virus	Flavivirus	Flaviviridae	ssRNA(+)	10179	GenBank	partial		Thailand	Thailand	Homo sapiens		2000-01-01	Dengue virus type I isolate 02089/00 polyprotein (POLY) gene, complete cds
MW946198	Katzelnick,L., Escoto,A., Huang,A., Garcia-Carreras,B., Chowdhury,N., Berry,I., Chavez,C., Rutvisuttinunt,W., Buchy,P., Duong,V., Dussart,P., Gromowski,G., Macareo,L., Smith,D., Jarman,R., Whitehead,S., Salje,H., Cummings,D., Lessler,J., Melendrez,M., Endy,T., Kalanarooj,S., A-Nuegoonpipat,A., Chanama,S., Sangkijporn,S., Klungthong,C., Thaisomboonsuk,B., Nisalak,A., Gibbons,R., Iamsirithaworn,S.,…	2021-04-22 21:00:00	00109/05	Dengue virus	Flavivirus	Flaviviridae	ssRNA(+)	10179	GenBank	partial		Thailand	Thailand	Homo sapiens		2005-01-01	Dengue virus type I isolate 00109/05 polyprotein (POLY) gene, complete cds
MW946197	Katzelnick,L., Escoto,A., Huang,A., Garcia-Carreras,B., Chowdhury,N., Berry,I., Chavez,C., Rutvisuttinunt,W., Buchy,P., Duong,V., Dussart,P., Gromowski,G., Macareo,L., Smith,D., Jarman,R., Whitehead,S., Salje,H., Cummings,D., Lessler,J., Melendrez,M., Endy,T., Kalanarooj,S., A-Nuegoonpipat,A., Chanama,S., Sangkijporn,S., Klungthong,C., Thaisomboonsuk,B., Nisalak,A., Gibbons,R., Iamsirithaworn,S.,…	2021-04-22 21:00:00	02150/03	Dengue virus	Flavivirus	Flaviviridae	ssRNA(+)	10179	GenBank	partial		Thailand	Thailand	Homo sapiens		2003-01-01	Dengue virus type I isolate 02150/03 polyprotein (POLY) gene, complete cds
MW946196	Katzelnick,L., Escoto,A., Huang,A., Garcia-Carreras,B., Chowdhury,N., Berry,I., Chavez,C., Rutvisuttinunt,W., Buchy,P., Duong,V., Dussart,P., Gromowski,G., Macareo,L., Smith,D., Jarman,R., Whitehead,S., Salje,H., Cummings,D., Lessler,J., Melendrez,M., Endy,T., Kalanarooj,S., A-Nuegoonpipat,A., Chanama,S., Sangkijporn,S., Klungthong,C., Thaisomboonsuk,B., Nisalak,A., Gibbons,R., Iamsirithaworn,S.,…	2021-04-22 21:00:00	00968/95	Dengue virus	Flavivirus	Flaviviridae	ssRNA(+)	10179	GenBank	partial		Thailand	Thailand	Homo sapiens		1995-01-01	Dengue virus type I isolate 00968/95 polyprotein (POLY) gene, complete cds
MW946195	Katzelnick,L., Escoto,A., Huang,A., Garcia-Carreras,B., Chowdhury,N., Berry,I., Chavez,C., Rutvisuttinunt,W., Buchy,P., Duong,V., Dussart,P., Gromowski,G., Macareo,L., Smith,D., Jarman,R., Whitehead,S., Salje,H., Cummings,D., Lessler,J., Melendrez,M., Endy,T., Kalanarooj,S., A-Nuegoonpipat,A., Chanama,S., Sangkijporn,S., Klungthong,C., Thaisomboonsuk,B., Nisalak,A., Gibbons,R., Iamsirithaworn,S.,…	2021-04-22 21:00:00	00263/94	Dengue virus	Flavivirus	Flaviviridae	ssRNA(+)	10179	GenBank	partial		Thailand	Thailand	Homo sapiens		1994-01-01	Dengue virus type I isolate 00263/94 polyprotein (POLY) gene, complete cds
MW946194	Katzelnick,L., Escoto,A., Huang,A., Garcia-Carreras,B., Chowdhury,N., Berry,I., Chavez,C., Rutvisuttinunt,W., Buchy,P., Duong,V., Dussart,P., Gromowski,G., Macareo,L., Smith,D., Jarman,R., Whitehead,S., Salje,H., Cummings,D., Lessler,J., Melendrez,M., Endy,T., Kalanarooj,S., A-Nuegoonpipat,A., Chanama,S., Sangkijporn,S., Klungthong,C., Thaisomboonsuk,B., Nisalak,A., Gibbons,R., Iamsirithaworn,S.,…	2021-04-22 21:00:00	00809/12	Dengue virus	Flavivirus	Flaviviridae	ssRNA(+)	10179	GenBank	partial		Thailand	Thailand	Homo sapiens		2012-01-01	Dengue virus type I isolate 00809/12 polyprotein (POLY) gene, complete cds
MW946193	Katzelnick,L., Escoto,A., Huang,A., Garcia-Carreras,B., Chowdhury,N., Berry,I., Chavez,C., Rutvisuttinunt,W., Buchy,P., Duong,V., Dussart,P., Gromowski,G., Macareo,L., Smith,D., Jarman,R., Whitehead,S., Salje,H., Cummings,D., Lessler,J., Melendrez,M., Endy,T., Kalanarooj,S., A-Nuegoonpipat,A., Chanama,S., Sangkijporn,S., Klungthong,C., Thaisomboonsuk,B., Nisalak,A., Gibbons,R., Iamsirithaworn,S.,…	2021-04-22 21:00:00	02588/97	Dengue virus	Flavivirus	Flaviviridae	ssRNA(+)	10179	GenBank	partial		Thailand	Thailand	Homo sapiens		1997-01-01	Dengue virus type I isolate 02588/97 polyprotein (POLY) gene, complete cds
MW946192	Katzelnick,L., Escoto,A., Huang,A., Garcia-Carreras,B., Chowdhury,N., Berry,I., Chavez,C., Rutvisuttinunt,W., Buchy,P., Duong,V., Dussart,P., Gromowski,G., Macareo,L., Smith,D., Jarman,R., Whitehead,S., Salje,H., Cummings,D., Lessler,J., Melendrez,M., Endy,T., Kalanarooj,S., A-Nuegoonpipat,A., Chanama,S., Sangkijporn,S., Klungthong,C., Thaisomboonsuk,B., Nisalak,A., Gibbons,R., Iamsirithaworn,S.,…	2021-04-22 21:00:00	00961/03	Dengue virus	Flavivirus	Flaviviridae	ssRNA(+)	10179	GenBank	partial		Thailand	Thailand	Homo sapiens		2003-01-01	Dengue virus type I isolate 00961/03 polyprotein (POLY) gene, complete cds
MW946191	Katzelnick,L., Escoto,A., Huang,A., Garcia-Carreras,B., Chowdhury,N., Berry,I., Chavez,C., Rutvisuttinunt,W., Buchy,P., Duong,V., Dussart,P., Gromowski,G., Macareo,L., Smith,D., Jarman,R., Whitehead,S., Salje,H., Cummings,D., Lessler,J., Melendrez,M., Endy,T., Kalanarooj,S., A-Nuegoonpipat,A., Chanama,S., Sangkijporn,S., Klungthong,C., Thaisomboonsuk,B., Nisalak,A., Gibbons,R., Iamsirithaworn,S.,…	2021-04-22 21:00:00	00739/98	Dengue virus	Flavivirus	Flaviviridae	ssRNA(+)	10179	GenBank	partial		Thailand	Thailand	Homo sapiens		1998-01-01	Dengue virus type I isolate 00739/98 polyprotein (POLY) gene, complete cds
MW946190	Katzelnick,L., Escoto,A., Huang,A., Garcia-Carreras,B., Chowdhury,N., Berry,I., Chavez,C., Rutvisuttinunt,W., Buchy,P., Duong,V., Dussart,P., Gromowski,G., Macareo,L., Smith,D., Jarman,R., Whitehead,S., Salje,H., Cummings,D., Lessler,J., Melendrez,M., Endy,T., Kalanarooj,S., A-Nuegoonpipat,A., Chanama,S., Sangkijporn,S., Klungthong,C., Thaisomboonsuk,B., Nisalak,A., Gibbons,R., Iamsirithaworn,S.,…	2021-04-22 21:00:00	01723/94	Dengue virus	Flavivirus	Flaviviridae	ssRNA(+)	10179	GenBank	partial		Thailand	Thailand	Homo sapiens		1994-01-01	Dengue virus type I isolate 01723/94 polyprotein (POLY) gene, complete cds
MW946189	Katzelnick,L., Escoto,A., Huang,A., Garcia-Carreras,B., Chowdhury,N., Berry,I., Chavez,C., Rutvisuttinunt,W., Buchy,P., Duong,V., Dussart,P., Gromowski,G., Macareo,L., Smith,D., Jarman,R., Whitehead,S., Salje,H., Cummings,D., Lessler,J., Melendrez,M., Endy,T., Kalanarooj,S., A-Nuegoonpipat,A., Chanama,S., Sangkijporn,S., Klungthong,C., Thaisomboonsuk,B., Nisalak,A., Gibbons,R., Iamsirithaworn,S.,…	2021-04-22 21:00:00	01821/02	Dengue virus	Flavivirus	Flaviviridae	ssRNA(+)	10179	GenBank	partial		Thailand	Thailand	Homo sapiens		2002-01-01	Dengue virus type I isolate 01821/02 polyprotein (POLY) gene, complete cds
MW946188	Katzelnick,L., Escoto,A., Huang,A., Garcia-Carreras,B., Chowdhury,N., Berry,I., Chavez,C., Rutvisuttinunt,W., Buchy,P., Duong,V., Dussart,P., Gromowski,G., Macareo,L., Smith,D., Jarman,R., Whitehead,S., Salje,H., Cummings,D., Lessler,J., Melendrez,M., Endy,T., Kalanarooj,S., A-Nuegoonpipat,A., Chanama,S., Sangkijporn,S., Klungthong,C., Thaisomboonsuk,B., Nisalak,A., Gibbons,R., Iamsirithaworn,S.,…	2021-04-22 21:00:00	03086/01	Dengue virus	Flavivirus	Flaviviridae	ssRNA(+)	10179	GenBank	partial		Thailand	Thailand	Homo sapiens		2001-01-01	Dengue virus type I isolate 03086/01 polyprotein (POLY) gene, complete cds
MW946187	Katzelnick,L., Escoto,A., Huang,A., Garcia-Carreras,B., Chowdhury,N., Berry,I., Chavez,C., Rutvisuttinunt,W., Buchy,P., Duong,V., Dussart,P., Gromowski,G., Macareo,L., Smith,D., Jarman,R., Whitehead,S., Salje,H., Cummings,D., Lessler,J., Melendrez,M., Endy,T., Kalanarooj,S., A-Nuegoonpipat,A., Chanama,S., Sangkijporn,S., Klungthong,C., Thaisomboonsuk,B., Nisalak,A., Gibbons,R., Iamsirithaworn,S.,…	2021-04-22 21:00:00	02433/06	Dengue virus	Flavivirus	Flaviviridae	ssRNA(+)	10179	GenBank	partial		Thailand	Thailand	Homo sapiens		2006-01-01	Dengue virus type I isolate 02433/06 polyprotein (POLY) gene, complete cds
MW946186	Katzelnick,L., Escoto,A., Huang,A., Garcia-Carreras,B., Chowdhury,N., Berry,I., Chavez,C., Rutvisuttinunt,W., Buchy,P., Duong,V., Dussart,P., Gromowski,G., Macareo,L., Smith,D., Jarman,R., Whitehead,S., Salje,H., Cummings,D., Lessler,J., Melendrez,M., Endy,T., Kalanarooj,S., A-Nuegoonpipat,A., Chanama,S., Sangkijporn,S., Klungthong,C., Thaisomboonsuk,B., Nisalak,A., Gibbons,R., Iamsirithaworn,S.,…	2021-04-22 21:00:00	02547/06	Dengue virus	Flavivirus	Flaviviridae	ssRNA(+)	10179	GenBank	partial		Thailand	Thailand	Homo sapiens		2006-01-01	Dengue virus type I isolate 02547/06 polyprotein (POLY) gene, complete cds
MW946185	Katzelnick,L., Escoto,A., Huang,A., Garcia-Carreras,B., Chowdhury,N., Berry,I., Chavez,C., Rutvisuttinunt,W., Buchy,P., Duong,V., Dussart,P., Gromowski,G., Macareo,L., Smith,D., Jarman,R., Whitehead,S., Salje,H., Cummings,D., Lessler,J., Melendrez,M., Endy,T., Kalanarooj,S., A-Nuegoonpipat,A., Chanama,S., Sangkijporn,S., Klungthong,C., Thaisomboonsuk,B., Nisalak,A., Gibbons,R., Iamsirithaworn,S.,…	2021-04-22 21:00:00	02834/06	Dengue virus	Flavivirus	Flaviviridae	ssRNA(+)	10179	GenBank	partial		Thailand	Thailand	Homo sapiens		2006-01-01	Dengue virus type I isolate 02834/06 polyprotein (POLY) gene, complete cds
MW946184	Katzelnick,L., Escoto,A., Huang,A., Garcia-Carreras,B., Chowdhury,N., Berry,I., Chavez,C., Rutvisuttinunt,W., Buchy,P., Duong,V., Dussart,P., Gromowski,G., Macareo,L., Smith,D., Jarman,R., Whitehead,S., Salje,H., Cummings,D., Lessler,J., Melendrez,M., Endy,T., Kalanarooj,S., A-Nuegoonpipat,A., Chanama,S., Sangkijporn,S., Klungthong,C., Thaisomboonsuk,B., Nisalak,A., Gibbons,R., Iamsirithaworn,S.,…	2021-04-22 21:00:00	00807/12	Dengue virus	Flavivirus	Flaviviridae	ssRNA(+)	10179	GenBank	partial		Thailand	Thailand	Homo sapiens		2012-01-01	Dengue virus type I isolate 00807/12 polyprotein (POLY) gene, complete cds
MW946183	Katzelnick,L., Escoto,A., Huang,A., Garcia-Carreras,B., Chowdhury,N., Berry,I., Chavez,C., Rutvisuttinunt,W., Buchy,P., Duong,V., Dussart,P., Gromowski,G., Macareo,L., Smith,D., Jarman,R., Whitehead,S., Salje,H., Cummings,D., Lessler,J., Melendrez,M., Endy,T., Kalanarooj,S., A-Nuegoonpipat,A., Chanama,S., Sangkijporn,S., Klungthong,C., Thaisomboonsuk,B., Nisalak,A., Gibbons,R., Iamsirithaworn,S.,…	2021-04-22 21:00:00	02585/06	Dengue virus	Flavivirus	Flaviviridae	ssRNA(+)	10179	GenBank	partial		Thailand	Thailand	Homo sapiens		2006-01-01	Dengue virus type I isolate 02585/06 polyprotein (POLY) gene, complete cds
MW946182	Katzelnick,L., Escoto,A., Huang,A., Garcia-Carreras,B., Chowdhury,N., Berry,I., Chavez,C., Rutvisuttinunt,W., Buchy,P., Duong,V., Dussart,P., Gromowski,G., Macareo,L., Smith,D., Jarman,R., Whitehead,S., Salje,H., Cummings,D., Lessler,J., Melendrez,M., Endy,T., Kalanarooj,S., A-Nuegoonpipat,A., Chanama,S., Sangkijporn,S., Klungthong,C., Thaisomboonsuk,B., Nisalak,A., Gibbons,R., Iamsirithaworn,S.,…	2021-04-22 21:00:00	00479/04	Dengue virus	Flavivirus	Flaviviridae	ssRNA(+)	10179	GenBank	partial		Thailand	Thailand	Homo sapiens		2004-01-01	Dengue virus type I isolate 00479/04 polyprotein (POLY) gene, complete cds
MW946181	Katzelnick,L., Escoto,A., Huang,A., Garcia-Carreras,B., Chowdhury,N., Berry,I., Chavez,C., Rutvisuttinunt,W., Buchy,P., Duong,V., Dussart,P., Gromowski,G., Macareo,L., Smith,D., Jarman,R., Whitehead,S., Salje,H., Cummings,D., Lessler,J., Melendrez,M., Endy,T., Kalanarooj,S., A-Nuegoonpipat,A., Chanama,S., Sangkijporn,S., Klungthong,C., Thaisomboonsuk,B., Nisalak,A., Gibbons,R., Iamsirithaworn,S.,…	2021-04-22 21:00:00	00306/05	Dengue virus	Flavivirus	Flaviviridae	ssRNA(+)	10179	GenBank	partial		Thailand	Thailand	Homo sapiens		2005-01-01	Dengue virus type I isolate 00306/05 polyprotein (POLY) gene, complete cds
MW946180	Katzelnick,L., Escoto,A., Huang,A., Garcia-Carreras,B., Chowdhury,N., Berry,I., Chavez,C., Rutvisuttinunt,W., Buchy,P., Duong,V., Dussart,P., Gromowski,G., Macareo,L., Smith,D., Jarman,R., Whitehead,S., Salje,H., Cummings,D., Lessler,J., Melendrez,M., Endy,T., Kalanarooj,S., A-Nuegoonpipat,A., Chanama,S., Sangkijporn,S., Klungthong,C., Thaisomboonsuk,B., Nisalak,A., Gibbons,R., Iamsirithaworn,S.,…	2021-04-22 21:00:00	00062/13	Dengue virus	Flavivirus	Flaviviridae	ssRNA(+)	10179	GenBank	partial		Thailand	Thailand	Homo sapiens		2013-01-01	Dengue virus type I isolate 00062/13 polyprotein (POLY) gene, complete cds
MW946179	Katzelnick,L., Escoto,A., Huang,A., Garcia-Carreras,B., Chowdhury,N., Berry,I., Chavez,C., Rutvisuttinunt,W., Buchy,P., Duong,V., Dussart,P., Gromowski,G., Macareo,L., Smith,D., Jarman,R., Whitehead,S., Salje,H., Cummings,D., Lessler,J., Melendrez,M., Endy,T., Kalanarooj,S., A-Nuegoonpipat,A., Chanama,S., Sangkijporn,S., Klungthong,C., Thaisomboonsuk,B., Nisalak,A., Gibbons,R., Iamsirithaworn,S.,…	2021-04-22 21:00:00	01006/12	Dengue virus	Flavivirus	Flaviviridae	ssRNA(+)	10179	GenBank	partial		Thailand	Thailand	Homo sapiens		2012-01-01	Dengue virus type I isolate 01006/12 polyprotein (POLY) gene, complete cds
MW946178	Katzelnick,L., Escoto,A., Huang,A., Garcia-Carreras,B., Chowdhury,N., Berry,I., Chavez,C., Rutvisuttinunt,W., Buchy,P., Duong,V., Dussart,P., Gromowski,G., Macareo,L., Smith,D., Jarman,R., Whitehead,S., Salje,H., Cummings,D., Lessler,J., Melendrez,M., Endy,T., Kalanarooj,S., A-Nuegoonpipat,A., Chanama,S., Sangkijporn,S., Klungthong,C., Thaisomboonsuk,B., Nisalak,A., Gibbons,R., Iamsirithaworn,S.,…	2021-04-22 21:00:00	02701/97	Dengue virus	Flavivirus	Flaviviridae	ssRNA(+)	10179	GenBank	partial		Thailand	Thailand	Homo sapiens		1997-01-01	Dengue virus type I isolate 02701/97 polyprotein (POLY) gene, complete cds
MW946177	Katzelnick,L., Escoto,A., Huang,A., Garcia-Carreras,B., Chowdhury,N., Berry,I., Chavez,C., Rutvisuttinunt,W., Buchy,P., Duong,V., Dussart,P., Gromowski,G., Macareo,L., Smith,D., Jarman,R., Whitehead,S., Salje,H., Cummings,D., Lessler,J., Melendrez,M., Endy,T., Kalanarooj,S., A-Nuegoonpipat,A., Chanama,S., Sangkijporn,S., Klungthong,C., Thaisomboonsuk,B., Nisalak,A., Gibbons,R., Iamsirithaworn,S.,…	2021-04-22 21:00:00	30577/94	Dengue virus	Flavivirus	Flaviviridae	ssRNA(+)	10179	GenBank	partial		Thailand	Thailand	Homo sapiens		1994-01-01	Dengue virus type I isolate 30577/94 polyprotein (POLY) gene, complete cds
MW946176	Katzelnick,L., Escoto,A., Huang,A., Garcia-Carreras,B., Chowdhury,N., Berry,I., Chavez,C., Rutvisuttinunt,W., Buchy,P., Duong,V., Dussart,P., Gromowski,G., Macareo,L., Smith,D., Jarman,R., Whitehead,S., Salje,H., Cummings,D., Lessler,J., Melendrez,M., Endy,T., Kalanarooj,S., A-Nuegoonpipat,A., Chanama,S., Sangkijporn,S., Klungthong,C., Thaisomboonsuk,B., Nisalak,A., Gibbons,R., Iamsirithaworn,S.,…	2021-04-22 21:00:00	00431/02	Dengue virus	Flavivirus	Flaviviridae	ssRNA(+)	10179	GenBank	partial		Thailand	Thailand	Homo sapiens		2002-01-01	Dengue virus type I isolate 00431/02 polyprotein (POLY) gene, complete cds
MW946175	Katzelnick,L., Escoto,A., Huang,A., Garcia-Carreras,B., Chowdhury,N., Berry,I., Chavez,C., Rutvisuttinunt,W., Buchy,P., Duong,V., Dussart,P., Gromowski,G., Macareo,L., Smith,D., Jarman,R., Whitehead,S., Salje,H., Cummings,D., Lessler,J., Melendrez,M., Endy,T., Kalanarooj,S., A-Nuegoonpipat,A., Chanama,S., Sangkijporn,S., Klungthong,C., Thaisomboonsuk,B., Nisalak,A., Gibbons,R., Iamsirithaworn,S.,…	2021-04-22 21:00:00	01533/94	Dengue virus	Flavivirus	Flaviviridae	ssRNA(+)	10179	GenBank	partial		Thailand	Thailand	Homo sapiens		1994-01-01	Dengue virus type I isolate 01533/94 polyprotein (POLY) gene, complete cds
MW946174	Katzelnick,L., Escoto,A., Huang,A., Garcia-Carreras,B., Chowdhury,N., Berry,I., Chavez,C., Rutvisuttinunt,W., Buchy,P., Duong,V., Dussart,P., Gromowski,G., Macareo,L., Smith,D., Jarman,R., Whitehead,S., Salje,H., Cummings,D., Lessler,J., Melendrez,M., Endy,T., Kalanarooj,S., A-Nuegoonpipat,A., Chanama,S., Sangkijporn,S., Klungthong,C., Thaisomboonsuk,B., Nisalak,A., Gibbons,R., Iamsirithaworn,S.,…	2021-04-22 21:00:00	02583/06	Dengue virus	Flavivirus	Flaviviridae	ssRNA(+)	10179	GenBank	partial		Thailand	Thailand	Homo sapiens		2006-01-01	Dengue virus type I isolate 02583/06 polyprotein (POLY) gene, complete cds
MW946173	Katzelnick,L., Escoto,A., Huang,A., Garcia-Carreras,B., Chowdhury,N., Berry,I., Chavez,C., Rutvisuttinunt,W., Buchy,P., Duong,V., Dussart,P., Gromowski,G., Macareo,L., Smith,D., Jarman,R., Whitehead,S., Salje,H., Cummings,D., Lessler,J., Melendrez,M., Endy,T., Kalanarooj,S., A-Nuegoonpipat,A., Chanama,S., Sangkijporn,S., Klungthong,C., Thaisomboonsuk,B., Nisalak,A., Gibbons,R., Iamsirithaworn,S.,…	2021-04-22 21:00:00	00817/06	Dengue virus	Flavivirus	Flaviviridae	ssRNA(+)	10179	GenBank	partial		Thailand	Thailand	Homo sapiens		2006-01-01	Dengue virus type I isolate 00817/06 polyprotein (POLY) gene, complete cds
MW946172	Katzelnick,L., Escoto,A., Huang,A., Garcia-Carreras,B., Chowdhury,N., Berry,I., Chavez,C., Rutvisuttinunt,W., Buchy,P., Duong,V., Dussart,P., Gromowski,G., Macareo,L., Smith,D., Jarman,R., Whitehead,S., Salje,H., Cummings,D., Lessler,J., Melendrez,M., Endy,T., Kalanarooj,S., A-Nuegoonpipat,A., Chanama,S., Sangkijporn,S., Klungthong,C., Thaisomboonsuk,B., Nisalak,A., Gibbons,R., Iamsirithaworn,S.,…	2021-04-22 21:00:00	00272/11	Dengue virus	Flavivirus	Flaviviridae	ssRNA(+)	10179	GenBank	partial		Thailand	Thailand	Homo sapiens		2011-01-01	Dengue virus type I isolate 00272/11 polyprotein (POLY) gene, complete cds
MW946171	Katzelnick,L., Escoto,A., Huang,A., Garcia-Carreras,B., Chowdhury,N., Berry,I., Chavez,C., Rutvisuttinunt,W., Buchy,P., Duong,V., Dussart,P., Gromowski,G., Macareo,L., Smith,D., Jarman,R., Whitehead,S., Salje,H., Cummings,D., Lessler,J., Melendrez,M., Endy,T., Kalanarooj,S., A-Nuegoonpipat,A., Chanama,S., Sangkijporn,S., Klungthong,C., Thaisomboonsuk,B., Nisalak,A., Gibbons,R., Iamsirithaworn,S.,…	2021-04-22 21:00:00	01591/05	Dengue virus	Flavivirus	Flaviviridae	ssRNA(+)	10179	GenBank	partial		Thailand	Thailand	Homo sapiens		2005-01-01	Dengue virus type I isolate 01591/05 polyprotein (POLY) gene, complete cds
MW946170	Katzelnick,L., Escoto,A., Huang,A., Garcia-Carreras,B., Chowdhury,N., Berry,I., Chavez,C., Rutvisuttinunt,W., Buchy,P., Duong,V., Dussart,P., Gromowski,G., Macareo,L., Smith,D., Jarman,R., Whitehead,S., Salje,H., Cummings,D., Lessler,J., Melendrez,M., Endy,T., Kalanarooj,S., A-Nuegoonpipat,A., Chanama,S., Sangkijporn,S., Klungthong,C., Thaisomboonsuk,B., Nisalak,A., Gibbons,R., Iamsirithaworn,S.,…	2021-04-22 21:00:00	01579/02	Dengue virus	Flavivirus	Flaviviridae	ssRNA(+)	10179	GenBank	partial		Thailand	Thailand	Homo sapiens		2002-01-01	Dengue virus type I isolate 01579/02 polyprotein (POLY) gene, complete cds
MW946169	Katzelnick,L., Escoto,A., Huang,A., Garcia-Carreras,B., Chowdhury,N., Berry,I., Chavez,C., Rutvisuttinunt,W., Buchy,P., Duong,V., Dussart,P., Gromowski,G., Macareo,L., Smith,D., Jarman,R., Whitehead,S., Salje,H., Cummings,D., Lessler,J., Melendrez,M., Endy,T., Kalanarooj,S., A-Nuegoonpipat,A., Chanama,S., Sangkijporn,S., Klungthong,C., Thaisomboonsuk,B., Nisalak,A., Gibbons,R., Iamsirithaworn,S.,…	2021-04-22 21:00:00	01397/00	Dengue virus	Flavivirus	Flaviviridae	ssRNA(+)	10179	GenBank	partial		Thailand	Thailand	Homo sapiens		2000-01-01	Dengue virus type I isolate 01397/00 polyprotein (POLY) gene, complete cds
MW946168	Katzelnick,L., Escoto,A., Huang,A., Garcia-Carreras,B., Chowdhury,N., Berry,I., Chavez,C., Rutvisuttinunt,W., Buchy,P., Duong,V., Dussart,P., Gromowski,G., Macareo,L., Smith,D., Jarman,R., Whitehead,S., Salje,H., Cummings,D., Lessler,J., Melendrez,M., Endy,T., Kalanarooj,S., A-Nuegoonpipat,A., Chanama,S., Sangkijporn,S., Klungthong,C., Thaisomboonsuk,B., Nisalak,A., Gibbons,R., Iamsirithaworn,S.,…	2021-04-22 21:00:00	30254/95	Dengue virus	Flavivirus	Flaviviridae	ssRNA(+)	10179	GenBank	partial		Thailand	Thailand	Homo sapiens		1995-01-01	Dengue virus type I isolate 30254/95 polyprotein (POLY) gene, complete cds
MW946167	Katzelnick,L., Escoto,A., Huang,A., Garcia-Carreras,B., Chowdhury,N., Berry,I., Chavez,C., Rutvisuttinunt,W., Buchy,P., Duong,V., Dussart,P., Gromowski,G., Macareo,L., Smith,D., Jarman,R., Whitehead,S., Salje,H., Cummings,D., Lessler,J., Melendrez,M., Endy,T., Kalanarooj,S., A-Nuegoonpipat,A., Chanama,S., Sangkijporn,S., Klungthong,C., Thaisomboonsuk,B., Nisalak,A., Gibbons,R., Iamsirithaworn,S.,…	2021-04-22 21:00:00	01447/94	Dengue virus	Flavivirus	Flaviviridae	ssRNA(+)	10179	GenBank	partial		Thailand	Thailand	Homo sapiens		1994-01-01	Dengue virus type I isolate 01447/94 polyprotein (POLY) gene, complete cds
MW946166	Katzelnick,L., Escoto,A., Huang,A., Garcia-Carreras,B., Chowdhury,N., Berry,I., Chavez,C., Rutvisuttinunt,W., Buchy,P., Duong,V., Dussart,P., Gromowski,G., Macareo,L., Smith,D., Jarman,R., Whitehead,S., Salje,H., Cummings,D., Lessler,J., Melendrez,M., Endy,T., Kalanarooj,S., A-Nuegoonpipat,A., Chanama,S., Sangkijporn,S., Klungthong,C., Thaisomboonsuk,B., Nisalak,A., Gibbons,R., Iamsirithaworn,S.,…	2021-04-22 21:00:00	00763/12	Dengue virus	Flavivirus	Flaviviridae	ssRNA(+)	10179	GenBank	partial		Thailand	Thailand	Homo sapiens		2012-01-01	Dengue virus type I isolate 00763/12 polyprotein (POLY) gene, complete cds
MW946165	Katzelnick,L., Escoto,A., Huang,A., Garcia-Carreras,B., Chowdhury,N., Berry,I., Chavez,C., Rutvisuttinunt,W., Buchy,P., Duong,V., Dussart,P., Gromowski,G., Macareo,L., Smith,D., Jarman,R., Whitehead,S., Salje,H., Cummings,D., Lessler,J., Melendrez,M., Endy,T., Kalanarooj,S., A-Nuegoonpipat,A., Chanama,S., Sangkijporn,S., Klungthong,C., Thaisomboonsuk,B., Nisalak,A., Gibbons,R., Iamsirithaworn,S.,…	2021-04-22 21:00:00	01039/01	Dengue virus	Flavivirus	Flaviviridae	ssRNA(+)	10179	GenBank	partial		Thailand	Thailand	Homo sapiens		2001-01-01	Dengue virus type I isolate 01039/01 polyprotein (POLY) gene, complete cds
MW946164	Katzelnick,L., Escoto,A., Huang,A., Garcia-Carreras,B., Chowdhury,N., Berry,I., Chavez,C., Rutvisuttinunt,W., Buchy,P., Duong,V., Dussart,P., Gromowski,G., Macareo,L., Smith,D., Jarman,R., Whitehead,S., Salje,H., Cummings,D., Lessler,J., Melendrez,M., Endy,T., Kalanarooj,S., A-Nuegoonpipat,A., Chanama,S., Sangkijporn,S., Klungthong,C., Thaisomboonsuk,B., Nisalak,A., Gibbons,R., Iamsirithaworn,S.,…	2021-04-22 21:00:00	00392/06	Dengue virus	Flavivirus	Flaviviridae	ssRNA(+)	10179	GenBank	partial		Thailand	Thailand	Homo sapiens		2006-01-01	Dengue virus type I isolate 00392/06 polyprotein (POLY) gene, complete cds
MW946163	Katzelnick,L., Escoto,A., Huang,A., Garcia-Carreras,B., Chowdhury,N., Berry,I., Chavez,C., Rutvisuttinunt,W., Buchy,P., Duong,V., Dussart,P., Gromowski,G., Macareo,L., Smith,D., Jarman,R., Whitehead,S., Salje,H., Cummings,D., Lessler,J., Melendrez,M., Endy,T., Kalanarooj,S., A-Nuegoonpipat,A., Chanama,S., Sangkijporn,S., Klungthong,C., Thaisomboonsuk,B., Nisalak,A., Gibbons,R., Iamsirithaworn,S.,…	2021-04-22 21:00:00	00210/05	Dengue virus	Flavivirus	Flaviviridae	ssRNA(+)	10179	GenBank	partial		Thailand	Thailand	Homo sapiens		2005-01-01	Dengue virus type I isolate 00210/05 polyprotein (POLY) gene, complete cds
MW946162	Katzelnick,L., Escoto,A., Huang,A., Garcia-Carreras,B., Chowdhury,N., Berry,I., Chavez,C., Rutvisuttinunt,W., Buchy,P., Duong,V., Dussart,P., Gromowski,G., Macareo,L., Smith,D., Jarman,R., Whitehead,S., Salje,H., Cummings,D., Lessler,J., Melendrez,M., Endy,T., Kalanarooj,S., A-Nuegoonpipat,A., Chanama,S., Sangkijporn,S., Klungthong,C., Thaisomboonsuk,B., Nisalak,A., Gibbons,R., Iamsirithaworn,S.,…	2021-04-22 21:00:00	03910/01	Dengue virus	Flavivirus	Flaviviridae	ssRNA(+)	10179	GenBank	partial		Thailand	Thailand	Homo sapiens		2001-01-01	Dengue virus type I isolate 03910/01 polyprotein (POLY) gene, complete cds
MW946161	Katzelnick,L., Escoto,A., Huang,A., Garcia-Carreras,B., Chowdhury,N., Berry,I., Chavez,C., Rutvisuttinunt,W., Buchy,P., Duong,V., Dussart,P., Gromowski,G., Macareo,L., Smith,D., Jarman,R., Whitehead,S., Salje,H., Cummings,D., Lessler,J., Melendrez,M., Endy,T., Kalanarooj,S., A-Nuegoonpipat,A., Chanama,S., Sangkijporn,S., Klungthong,C., Thaisomboonsuk,B., Nisalak,A., Gibbons,R., Iamsirithaworn,S.,…	2021-04-22 21:00:00	02508/06	Dengue virus	Flavivirus	Flaviviridae	ssRNA(+)	10179	GenBank	partial		Thailand	Thailand	Homo sapiens		2006-01-01	Dengue virus type I isolate 02508/06 polyprotein (POLY) gene, complete cds
MW946160	Katzelnick,L., Escoto,A., Huang,A., Garcia-Carreras,B., Chowdhury,N., Berry,I., Chavez,C., Rutvisuttinunt,W., Buchy,P., Duong,V., Dussart,P., Gromowski,G., Macareo,L., Smith,D., Jarman,R., Whitehead,S., Salje,H., Cummings,D., Lessler,J., Melendrez,M., Endy,T., Kalanarooj,S., A-Nuegoonpipat,A., Chanama,S., Sangkijporn,S., Klungthong,C., Thaisomboonsuk,B., Nisalak,A., Gibbons,R., Iamsirithaworn,S.,…	2021-04-22 21:00:00	01579/98	Dengue virus	Flavivirus	Flaviviridae	ssRNA(+)	10179	GenBank	partial		Thailand	Thailand	Homo sapiens		1998-01-01	Dengue virus type I isolate 01579/98 polyprotein (POLY) gene, complete cds
MW946159	Katzelnick,L., Escoto,A., Huang,A., Garcia-Carreras,B., Chowdhury,N., Berry,I., Chavez,C., Rutvisuttinunt,W., Buchy,P., Duong,V., Dussart,P., Gromowski,G., Macareo,L., Smith,D., Jarman,R., Whitehead,S., Salje,H., Cummings,D., Lessler,J., Melendrez,M., Endy,T., Kalanarooj,S., A-Nuegoonpipat,A., Chanama,S., Sangkijporn,S., Klungthong,C., Thaisomboonsuk,B., Nisalak,A., Gibbons,R., Iamsirithaworn,S.,…	2021-04-22 21:00:00	01095/96	Dengue virus	Flavivirus	Flaviviridae	ssRNA(+)	10179	GenBank	partial		Thailand	Thailand	Homo sapiens		1996-01-01	Dengue virus type I isolate 01095/96 polyprotein (POLY) gene, complete cds
MW946158	Katzelnick,L., Escoto,A., Huang,A., Garcia-Carreras,B., Chowdhury,N., Berry,I., Chavez,C., Rutvisuttinunt,W., Buchy,P., Duong,V., Dussart,P., Gromowski,G., Macareo,L., Smith,D., Jarman,R., Whitehead,S., Salje,H., Cummings,D., Lessler,J., Melendrez,M., Endy,T., Kalanarooj,S., A-Nuegoonpipat,A., Chanama,S., Sangkijporn,S., Klungthong,C., Thaisomboonsuk,B., Nisalak,A., Gibbons,R., Iamsirithaworn,S.,…	2021-04-22 21:00:00	00380/99	Dengue virus	Flavivirus	Flaviviridae	ssRNA(+)	10179	GenBank	partial		Thailand	Thailand	Homo sapiens		1999-01-01	Dengue virus type I isolate 00380/99 polyprotein (POLY) gene, complete cds
MW946157	Katzelnick,L., Escoto,A., Huang,A., Garcia-Carreras,B., Chowdhury,N., Berry,I., Chavez,C., Rutvisuttinunt,W., Buchy,P., Duong,V., Dussart,P., Gromowski,G., Macareo,L., Smith,D., Jarman,R., Whitehead,S., Salje,H., Cummings,D., Lessler,J., Melendrez,M., Endy,T., Kalanarooj,S., A-Nuegoonpipat,A., Chanama,S., Sangkijporn,S., Klungthong,C., Thaisomboonsuk,B., Nisalak,A., Gibbons,R., Iamsirithaworn,S.,…	2021-04-22 21:00:00	01858/06	Dengue virus	Flavivirus	Flaviviridae	ssRNA(+)	10179	GenBank	partial		Thailand	Thailand	Homo sapiens		2006-01-01	Dengue virus type I isolate 01858/06 polyprotein (POLY) gene, complete cds
MW946156	Katzelnick,L., Escoto,A., Huang,A., Garcia-Carreras,B., Chowdhury,N., Berry,I., Chavez,C., Rutvisuttinunt,W., Buchy,P., Duong,V., Dussart,P., Gromowski,G., Macareo,L., Smith,D., Jarman,R., Whitehead,S., Salje,H., Cummings,D., Lessler,J., Melendrez,M., Endy,T., Kalanarooj,S., A-Nuegoonpipat,A., Chanama,S., Sangkijporn,S., Klungthong,C., Thaisomboonsuk,B., Nisalak,A., Gibbons,R., Iamsirithaworn,S.,…	2021-04-22 21:00:00	00348/03	Dengue virus	Flavivirus	Flaviviridae	ssRNA(+)	10179	GenBank	partial		Thailand	Thailand	Homo sapiens		2003-01-01	Dengue virus type I isolate 00348/03 polyprotein (POLY) gene, complete cds
MW946155	Katzelnick,L., Escoto,A., Huang,A., Garcia-Carreras,B., Chowdhury,N., Berry,I., Chavez,C., Rutvisuttinunt,W., Buchy,P., Duong,V., Dussart,P., Gromowski,G., Macareo,L., Smith,D., Jarman,R., Whitehead,S., Salje,H., Cummings,D., Lessler,J., Melendrez,M., Endy,T., Kalanarooj,S., A-Nuegoonpipat,A., Chanama,S., Sangkijporn,S., Klungthong,C., Thaisomboonsuk,B., Nisalak,A., Gibbons,R., Iamsirithaworn,S.,…	2021-04-22 21:00:00	02789/06	Dengue virus	Flavivirus	Flaviviridae	ssRNA(+)	10179	GenBank	partial		Thailand	Thailand	Homo sapiens		2006-01-01	Dengue virus type I isolate 02789/06 polyprotein (POLY) gene, complete cds
MW946154	Katzelnick,L., Escoto,A., Huang,A., Garcia-Carreras,B., Chowdhury,N., Berry,I., Chavez,C., Rutvisuttinunt,W., Buchy,P., Duong,V., Dussart,P., Gromowski,G., Macareo,L., Smith,D., Jarman,R., Whitehead,S., Salje,H., Cummings,D., Lessler,J., Melendrez,M., Endy,T., Kalanarooj,S., A-Nuegoonpipat,A., Chanama,S., Sangkijporn,S., Klungthong,C., Thaisomboonsuk,B., Nisalak,A., Gibbons,R., Iamsirithaworn,S.,…	2021-04-22 21:00:00	00375/96	Dengue virus	Flavivirus	Flaviviridae	ssRNA(+)	10179	GenBank	partial		Thailand	Thailand	Homo sapiens		1996-01-01	Dengue virus type I isolate 00375/96 polyprotein (POLY) gene, complete cds
MW946153	Katzelnick,L., Escoto,A., Huang,A., Garcia-Carreras,B., Chowdhury,N., Berry,I., Chavez,C., Rutvisuttinunt,W., Buchy,P., Duong,V., Dussart,P., Gromowski,G., Macareo,L., Smith,D., Jarman,R., Whitehead,S., Salje,H., Cummings,D., Lessler,J., Melendrez,M., Endy,T., Kalanarooj,S., A-Nuegoonpipat,A., Chanama,S., Sangkijporn,S., Klungthong,C., Thaisomboonsuk,B., Nisalak,A., Gibbons,R., Iamsirithaworn,S.,…	2021-04-22 21:00:00	00713/06	Dengue virus	Flavivirus	Flaviviridae	ssRNA(+)	10179	GenBank	partial		Thailand	Thailand	Homo sapiens		2006-01-01	Dengue virus type I isolate 00713/06 polyprotein (POLY) gene, complete cds
MW946152	Katzelnick,L., Escoto,A., Huang,A., Garcia-Carreras,B., Chowdhury,N., Berry,I., Chavez,C., Rutvisuttinunt,W., Buchy,P., Duong,V., Dussart,P., Gromowski,G., Macareo,L., Smith,D., Jarman,R., Whitehead,S., Salje,H., Cummings,D., Lessler,J., Melendrez,M., Endy,T., Kalanarooj,S., A-Nuegoonpipat,A., Chanama,S., Sangkijporn,S., Klungthong,C., Thaisomboonsuk,B., Nisalak,A., Gibbons,R., Iamsirithaworn,S.,…	2021-04-22 21:00:00	01651/05	Dengue virus	Flavivirus	Flaviviridae	ssRNA(+)	10179	GenBank	partial		Thailand	Thailand	Homo sapiens		2005-01-01	Dengue virus type I isolate 01651/05 polyprotein (POLY) gene, complete cds
MW946151	Katzelnick,L., Escoto,A., Huang,A., Garcia-Carreras,B., Chowdhury,N., Berry,I., Chavez,C., Rutvisuttinunt,W., Buchy,P., Duong,V., Dussart,P., Gromowski,G., Macareo,L., Smith,D., Jarman,R., Whitehead,S., Salje,H., Cummings,D., Lessler,J., Melendrez,M., Endy,T., Kalanarooj,S., A-Nuegoonpipat,A., Chanama,S., Sangkijporn,S., Klungthong,C., Thaisomboonsuk,B., Nisalak,A., Gibbons,R., Iamsirithaworn,S.,…	2021-04-22 21:00:00	02000/06	Dengue virus	Flavivirus	Flaviviridae	ssRNA(+)	10179	GenBank	partial		Thailand	Thailand	Homo sapiens		2006-01-01	Dengue virus type I isolate 02000/06 polyprotein (POLY) gene, complete cds
MW946150	Katzelnick,L., Escoto,A., Huang,A., Garcia-Carreras,B., Chowdhury,N., Berry,I., Chavez,C., Rutvisuttinunt,W., Buchy,P., Duong,V., Dussart,P., Gromowski,G., Macareo,L., Smith,D., Jarman,R., Whitehead,S., Salje,H., Cummings,D., Lessler,J., Melendrez,M., Endy,T., Kalanarooj,S., A-Nuegoonpipat,A., Chanama,S., Sangkijporn,S., Klungthong,C., Thaisomboonsuk,B., Nisalak,A., Gibbons,R., Iamsirithaworn,S.,…	2021-04-22 21:00:00	02595/06	Dengue virus	Flavivirus	Flaviviridae	ssRNA(+)	10179	GenBank	partial		Thailand	Thailand	Homo sapiens		2006-01-01	Dengue virus type I isolate 02595/06 polyprotein (POLY) gene, complete cds
MW946149	Katzelnick,L., Escoto,A., Huang,A., Garcia-Carreras,B., Chowdhury,N., Berry,I., Chavez,C., Rutvisuttinunt,W., Buchy,P., Duong,V., Dussart,P., Gromowski,G., Macareo,L., Smith,D., Jarman,R., Whitehead,S., Salje,H., Cummings,D., Lessler,J., Melendrez,M., Endy,T., Kalanarooj,S., A-Nuegoonpipat,A., Chanama,S., Sangkijporn,S., Klungthong,C., Thaisomboonsuk,B., Nisalak,A., Gibbons,R., Iamsirithaworn,S.,…	2021-04-22 21:00:00	01982/03	Dengue virus	Flavivirus	Flaviviridae	ssRNA(+)	10179	GenBank	partial		Thailand	Thailand	Homo sapiens		2003-01-01	Dengue virus type I isolate 01982/03 polyprotein (POLY) gene, complete cds
MW946148	Katzelnick,L., Escoto,A., Huang,A., Garcia-Carreras,B., Chowdhury,N., Berry,I., Chavez,C., Rutvisuttinunt,W., Buchy,P., Duong,V., Dussart,P., Gromowski,G., Macareo,L., Smith,D., Jarman,R., Whitehead,S., Salje,H., Cummings,D., Lessler,J., Melendrez,M., Endy,T., Kalanarooj,S., A-Nuegoonpipat,A., Chanama,S., Sangkijporn,S., Klungthong,C., Thaisomboonsuk,B., Nisalak,A., Gibbons,R., Iamsirithaworn,S.,…	2021-04-22 21:00:00	05236/01	Dengue virus	Flavivirus	Flaviviridae	ssRNA(+)	10179	GenBank	partial		Thailand	Thailand	Homo sapiens		2001-01-01	Dengue virus type I isolate 05236/01 polyprotein (POLY) gene, complete cds
MW946147	Katzelnick,L., Escoto,A., Huang,A., Garcia-Carreras,B., Chowdhury,N., Berry,I., Chavez,C., Rutvisuttinunt,W., Buchy,P., Duong,V., Dussart,P., Gromowski,G., Macareo,L., Smith,D., Jarman,R., Whitehead,S., Salje,H., Cummings,D., Lessler,J., Melendrez,M., Endy,T., Kalanarooj,S., A-Nuegoonpipat,A., Chanama,S., Sangkijporn,S., Klungthong,C., Thaisomboonsuk,B., Nisalak,A., Gibbons,R., Iamsirithaworn,S.,…	2021-04-22 21:00:00	01147/05	Dengue virus	Flavivirus	Flaviviridae	ssRNA(+)	10179	GenBank	partial		Thailand	Thailand	Homo sapiens		2005-01-01	Dengue virus type I isolate 01147/05 polyprotein (POLY) gene, complete cds
MW946146	Katzelnick,L., Escoto,A., Huang,A., Garcia-Carreras,B., Chowdhury,N., Berry,I., Chavez,C., Rutvisuttinunt,W., Buchy,P., Duong,V., Dussart,P., Gromowski,G., Macareo,L., Smith,D., Jarman,R., Whitehead,S., Salje,H., Cummings,D., Lessler,J., Melendrez,M., Endy,T., Kalanarooj,S., A-Nuegoonpipat,A., Chanama,S., Sangkijporn,S., Klungthong,C., Thaisomboonsuk,B., Nisalak,A., Gibbons,R., Iamsirithaworn,S.,…	2021-04-22 21:00:00	30179/95	Dengue virus	Flavivirus	Flaviviridae	ssRNA(+)	10179	GenBank	partial		Thailand	Thailand	Homo sapiens		1995-01-01	Dengue virus type I isolate 30179/95 polyprotein (POLY) gene, complete cds
MW946145	Katzelnick,L., Escoto,A., Huang,A., Garcia-Carreras,B., Chowdhury,N., Berry,I., Chavez,C., Rutvisuttinunt,W., Buchy,P., Duong,V., Dussart,P., Gromowski,G., Macareo,L., Smith,D., Jarman,R., Whitehead,S., Salje,H., Cummings,D., Lessler,J., Melendrez,M., Endy,T., Kalanarooj,S., A-Nuegoonpipat,A., Chanama,S., Sangkijporn,S., Klungthong,C., Thaisomboonsuk,B., Nisalak,A., Gibbons,R., Iamsirithaworn,S.,…	2021-04-22 21:00:00	00793/04	Dengue virus	Flavivirus	Flaviviridae	ssRNA(+)	10179	GenBank	partial		Thailand	Thailand	Homo sapiens		2004-01-01	Dengue virus type I isolate 00793/04 polyprotein (POLY) gene, complete cds
MW946144	Katzelnick,L., Escoto,A., Huang,A., Garcia-Carreras,B., Chowdhury,N., Berry,I., Chavez,C., Rutvisuttinunt,W., Buchy,P., Duong,V., Dussart,P., Gromowski,G., Macareo,L., Smith,D., Jarman,R., Whitehead,S., Salje,H., Cummings,D., Lessler,J., Melendrez,M., Endy,T., Kalanarooj,S., A-Nuegoonpipat,A., Chanama,S., Sangkijporn,S., Klungthong,C., Thaisomboonsuk,B., Nisalak,A., Gibbons,R., Iamsirithaworn,S.,…	2021-04-22 21:00:00	01393/02	Dengue virus	Flavivirus	Flaviviridae	ssRNA(+)	10179	GenBank	partial		Thailand	Thailand	Homo sapiens		2002-01-01	Dengue virus type I isolate 01393/02 polyprotein (POLY) gene, complete cds
MW946143	Katzelnick,L., Escoto,A., Huang,A., Garcia-Carreras,B., Chowdhury,N., Berry,I., Chavez,C., Rutvisuttinunt,W., Buchy,P., Duong,V., Dussart,P., Gromowski,G., Macareo,L., Smith,D., Jarman,R., Whitehead,S., Salje,H., Cummings,D., Lessler,J., Melendrez,M., Endy,T., Kalanarooj,S., A-Nuegoonpipat,A., Chanama,S., Sangkijporn,S., Klungthong,C., Thaisomboonsuk,B., Nisalak,A., Gibbons,R., Iamsirithaworn,S.,…	2021-04-22 21:00:00	01932/06	Dengue virus	Flavivirus	Flaviviridae	ssRNA(+)	10179	GenBank	partial		Thailand	Thailand	Homo sapiens		2006-01-01	Dengue virus type I isolate 01932/06 polyprotein (POLY) gene, complete cds
MW946142	Katzelnick,L., Escoto,A., Huang,A., Garcia-Carreras,B., Chowdhury,N., Berry,I., Chavez,C., Rutvisuttinunt,W., Buchy,P., Duong,V., Dussart,P., Gromowski,G., Macareo,L., Smith,D., Jarman,R., Whitehead,S., Salje,H., Cummings,D., Lessler,J., Melendrez,M., Endy,T., Kalanarooj,S., A-Nuegoonpipat,A., Chanama,S., Sangkijporn,S., Klungthong,C., Thaisomboonsuk,B., Nisalak,A., Gibbons,R., Iamsirithaworn,S.,…	2021-04-22 21:00:00	02553/06	Dengue virus	Flavivirus	Flaviviridae	ssRNA(+)	10179	GenBank	partial		Thailand	Thailand	Homo sapiens		2006-01-01	Dengue virus type I isolate 02553/06 polyprotein (POLY) gene, complete cds
MW946141	Katzelnick,L., Escoto,A., Huang,A., Garcia-Carreras,B., Chowdhury,N., Berry,I., Chavez,C., Rutvisuttinunt,W., Buchy,P., Duong,V., Dussart,P., Gromowski,G., Macareo,L., Smith,D., Jarman,R., Whitehead,S., Salje,H., Cummings,D., Lessler,J., Melendrez,M., Endy,T., Kalanarooj,S., A-Nuegoonpipat,A., Chanama,S., Sangkijporn,S., Klungthong,C., Thaisomboonsuk,B., Nisalak,A., Gibbons,R., Iamsirithaworn,S.,…	2021-04-22 21:00:00	02718/06	Dengue virus	Flavivirus	Flaviviridae	ssRNA(+)	10179	GenBank	partial		Thailand	Thailand	Homo sapiens		2006-01-01	Dengue virus type I isolate 02718/06 polyprotein (POLY) gene, complete cds
MW946140	Katzelnick,L., Escoto,A., Huang,A., Garcia-Carreras,B., Chowdhury,N., Berry,I., Chavez,C., Rutvisuttinunt,W., Buchy,P., Duong,V., Dussart,P., Gromowski,G., Macareo,L., Smith,D., Jarman,R., Whitehead,S., Salje,H., Cummings,D., Lessler,J., Melendrez,M., Endy,T., Kalanarooj,S., A-Nuegoonpipat,A., Chanama,S., Sangkijporn,S., Klungthong,C., Thaisomboonsuk,B., Nisalak,A., Gibbons,R., Iamsirithaworn,S.,…	2021-04-22 21:00:00	04762/01	Dengue virus	Flavivirus	Flaviviridae	ssRNA(+)	10179	GenBank	partial		Thailand	Thailand	Homo sapiens		2001-01-01	Dengue virus type I isolate 04762/01 polyprotein (POLY) gene, complete cds
MW946139	Katzelnick,L., Escoto,A., Huang,A., Garcia-Carreras,B., Chowdhury,N., Berry,I., Chavez,C., Rutvisuttinunt,W., Buchy,P., Duong,V., Dussart,P., Gromowski,G., Macareo,L., Smith,D., Jarman,R., Whitehead,S., Salje,H., Cummings,D., Lessler,J., Melendrez,M., Endy,T., Kalanarooj,S., A-Nuegoonpipat,A., Chanama,S., Sangkijporn,S., Klungthong,C., Thaisomboonsuk,B., Nisalak,A., Gibbons,R., Iamsirithaworn,S.,…	2021-04-22 21:00:00	02717/06	Dengue virus	Flavivirus	Flaviviridae	ssRNA(+)	10179	GenBank	partial		Thailand	Thailand	Homo sapiens		2006-01-01	Dengue virus type I isolate 02717/06 polyprotein (POLY) gene, complete cds
MW946138	Katzelnick,L., Escoto,A., Huang,A., Garcia-Carreras,B., Chowdhury,N., Berry,I., Chavez,C., Rutvisuttinunt,W., Buchy,P., Duong,V., Dussart,P., Gromowski,G., Macareo,L., Smith,D., Jarman,R., Whitehead,S., Salje,H., Cummings,D., Lessler,J., Melendrez,M., Endy,T., Kalanarooj,S., A-Nuegoonpipat,A., Chanama,S., Sangkijporn,S., Klungthong,C., Thaisomboonsuk,B., Nisalak,A., Gibbons,R., Iamsirithaworn,S.,…	2021-04-22 21:00:00	00633/80	Dengue virus	Flavivirus	Flaviviridae	ssRNA(+)	10179	GenBank	partial		Thailand	Thailand	Homo sapiens		1980-01-01	Dengue virus type I isolate 00633/80 polyprotein (POLY) gene, complete cds
MW946137	Katzelnick,L., Escoto,A., Huang,A., Garcia-Carreras,B., Chowdhury,N., Berry,I., Chavez,C., Rutvisuttinunt,W., Buchy,P., Duong,V., Dussart,P., Gromowski,G., Macareo,L., Smith,D., Jarman,R., Whitehead,S., Salje,H., Cummings,D., Lessler,J., Melendrez,M., Endy,T., Kalanarooj,S., A-Nuegoonpipat,A., Chanama,S., Sangkijporn,S., Klungthong,C., Thaisomboonsuk,B., Nisalak,A., Gibbons,R., Iamsirithaworn,S.,…	2021-04-22 21:00:00	06236/01	Dengue virus	Flavivirus	Flaviviridae	ssRNA(+)	10179	GenBank	partial		Thailand	Thailand	Homo sapiens		2001-01-01	Dengue virus type I isolate 06236/01 polyprotein (POLY) gene, complete cds
MW946136	Katzelnick,L., Escoto,A., Huang,A., Garcia-Carreras,B., Chowdhury,N., Berry,I., Chavez,C., Rutvisuttinunt,W., Buchy,P., Duong,V., Dussart,P., Gromowski,G., Macareo,L., Smith,D., Jarman,R., Whitehead,S., Salje,H., Cummings,D., Lessler,J., Melendrez,M., Endy,T., Kalanarooj,S., A-Nuegoonpipat,A., Chanama,S., Sangkijporn,S., Klungthong,C., Thaisomboonsuk,B., Nisalak,A., Gibbons,R., Iamsirithaworn,S.,…	2021-04-22 21:00:00	00841/06	Dengue virus	Flavivirus	Flaviviridae	ssRNA(+)	10179	GenBank	partial		Thailand	Thailand	Homo sapiens		2006-01-01	Dengue virus type I isolate 00841/06 polyprotein (POLY) gene, complete cds
MW946135	Katzelnick,L., Escoto,A., Huang,A., Garcia-Carreras,B., Chowdhury,N., Berry,I., Chavez,C., Rutvisuttinunt,W., Buchy,P., Duong,V., Dussart,P., Gromowski,G., Macareo,L., Smith,D., Jarman,R., Whitehead,S., Salje,H., Cummings,D., Lessler,J., Melendrez,M., Endy,T., Kalanarooj,S., A-Nuegoonpipat,A., Chanama,S., Sangkijporn,S., Klungthong,C., Thaisomboonsuk,B., Nisalak,A., Gibbons,R., Iamsirithaworn,S.,…	2021-04-22 21:00:00	03704/99	Dengue virus	Flavivirus	Flaviviridae	ssRNA(+)	10179	GenBank	partial		Thailand	Thailand	Homo sapiens		1999-01-01	Dengue virus type I isolate 03704/99 polyprotein (POLY) gene, complete cds
MW946134	Katzelnick,L., Escoto,A., Huang,A., Garcia-Carreras,B., Chowdhury,N., Berry,I., Chavez,C., Rutvisuttinunt,W., Buchy,P., Duong,V., Dussart,P., Gromowski,G., Macareo,L., Smith,D., Jarman,R., Whitehead,S., Salje,H., Cummings,D., Lessler,J., Melendrez,M., Endy,T., Kalanarooj,S., A-Nuegoonpipat,A., Chanama,S., Sangkijporn,S., Klungthong,C., Thaisomboonsuk,B., Nisalak,A., Gibbons,R., Iamsirithaworn,S.,…	2021-04-22 21:00:00	01771/96	Dengue virus	Flavivirus	Flaviviridae	ssRNA(+)	10179	GenBank	partial		Thailand	Thailand	Homo sapiens		1996-01-01	Dengue virus type I isolate 01771/96 polyprotein (POLY) gene, complete cds
MW946133	Katzelnick,L., Escoto,A., Huang,A., Garcia-Carreras,B., Chowdhury,N., Berry,I., Chavez,C., Rutvisuttinunt,W., Buchy,P., Duong,V., Dussart,P., Gromowski,G., Macareo,L., Smith,D., Jarman,R., Whitehead,S., Salje,H., Cummings,D., Lessler,J., Melendrez,M., Endy,T., Kalanarooj,S., A-Nuegoonpipat,A., Chanama,S., Sangkijporn,S., Klungthong,C., Thaisomboonsuk,B., Nisalak,A., Gibbons,R., Iamsirithaworn,S.,…	2021-04-22 21:00:00	01450/11	Dengue virus	Flavivirus	Flaviviridae	ssRNA(+)	10179	GenBank	partial		Thailand	Thailand	Homo sapiens		2011-01-01	Dengue virus type I isolate 01450/11 polyprotein (POLY) gene, complete cds
MW946132	Katzelnick,L., Escoto,A., Huang,A., Garcia-Carreras,B., Chowdhury,N., Berry,I., Chavez,C., Rutvisuttinunt,W., Buchy,P., Duong,V., Dussart,P., Gromowski,G., Macareo,L., Smith,D., Jarman,R., Whitehead,S., Salje,H., Cummings,D., Lessler,J., Melendrez,M., Endy,T., Kalanarooj,S., A-Nuegoonpipat,A., Chanama,S., Sangkijporn,S., Klungthong,C., Thaisomboonsuk,B., Nisalak,A., Gibbons,R., Iamsirithaworn,S.,…	2021-04-22 21:00:00	02679/06	Dengue virus	Flavivirus	Flaviviridae	ssRNA(+)	10179	GenBank	partial		Thailand	Thailand	Homo sapiens		2006-01-01	Dengue virus type I isolate 02679/06 polyprotein (POLY) gene, complete cds
MW946131	Katzelnick,L., Escoto,A., Huang,A., Garcia-Carreras,B., Chowdhury,N., Berry,I., Chavez,C., Rutvisuttinunt,W., Buchy,P., Duong,V., Dussart,P., Gromowski,G., Macareo,L., Smith,D., Jarman,R., Whitehead,S., Salje,H., Cummings,D., Lessler,J., Melendrez,M., Endy,T., Kalanarooj,S., A-Nuegoonpipat,A., Chanama,S., Sangkijporn,S., Klungthong,C., Thaisomboonsuk,B., Nisalak,A., Gibbons,R., Iamsirithaworn,S.,…	2021-04-22 21:00:00	03163/02	Dengue virus	Flavivirus	Flaviviridae	ssRNA(+)	10179	GenBank	partial		Thailand	Thailand	Homo sapiens		2002-01-01	Dengue virus type I isolate 03163/02 polyprotein (POLY) gene, complete cds
MW946130	Katzelnick,L., Escoto,A., Huang,A., Garcia-Carreras,B., Chowdhury,N., Berry,I., Chavez,C., Rutvisuttinunt,W., Buchy,P., Duong,V., Dussart,P., Gromowski,G., Macareo,L., Smith,D., Jarman,R., Whitehead,S., Salje,H., Cummings,D., Lessler,J., Melendrez,M., Endy,T., Kalanarooj,S., A-Nuegoonpipat,A., Chanama,S., Sangkijporn,S., Klungthong,C., Thaisomboonsuk,B., Nisalak,A., Gibbons,R., Iamsirithaworn,S.,…	2021-04-22 21:00:00	00006/06	Dengue virus	Flavivirus	Flaviviridae	ssRNA(+)	10179	GenBank	partial		Thailand	Thailand	Homo sapiens		2006-01-01	Dengue virus type I isolate 00006/06 polyprotein (POLY) gene, complete cds
MW946129	Katzelnick,L., Escoto,A., Huang,A., Garcia-Carreras,B., Chowdhury,N., Berry,I., Chavez,C., Rutvisuttinunt,W., Buchy,P., Duong,V., Dussart,P., Gromowski,G., Macareo,L., Smith,D., Jarman,R., Whitehead,S., Salje,H., Cummings,D., Lessler,J., Melendrez,M., Endy,T., Kalanarooj,S., A-Nuegoonpipat,A., Chanama,S., Sangkijporn,S., Klungthong,C., Thaisomboonsuk,B., Nisalak,A., Gibbons,R., Iamsirithaworn,S.,…	2021-04-22 21:00:00	00485/14	Dengue virus	Flavivirus	Flaviviridae	ssRNA(+)	10179	GenBank	partial		Thailand	Thailand	Homo sapiens		2014-01-01	Dengue virus type I isolate 00485/14 polyprotein (POLY) gene, complete cds
MW946128	Katzelnick,L., Escoto,A., Huang,A., Garcia-Carreras,B., Chowdhury,N., Berry,I., Chavez,C., Rutvisuttinunt,W., Buchy,P., Duong,V., Dussart,P., Gromowski,G., Macareo,L., Smith,D., Jarman,R., Whitehead,S., Salje,H., Cummings,D., Lessler,J., Melendrez,M., Endy,T., Kalanarooj,S., A-Nuegoonpipat,A., Chanama,S., Sangkijporn,S., Klungthong,C., Thaisomboonsuk,B., Nisalak,A., Gibbons,R., Iamsirithaworn,S.,…	2021-04-22 21:00:00	01937/06	Dengue virus	Flavivirus	Flaviviridae	ssRNA(+)	10179	GenBank	partial		Thailand	Thailand	Homo sapiens		2006-01-01	Dengue virus type I isolate 01937/06 polyprotein (POLY) gene, complete cds
MW946127	Katzelnick,L., Escoto,A., Huang,A., Garcia-Carreras,B., Chowdhury,N., Berry,I., Chavez,C., Rutvisuttinunt,W., Buchy,P., Duong,V., Dussart,P., Gromowski,G., Macareo,L., Smith,D., Jarman,R., Whitehead,S., Salje,H., Cummings,D., Lessler,J., Melendrez,M., Endy,T., Kalanarooj,S., A-Nuegoonpipat,A., Chanama,S., Sangkijporn,S., Klungthong,C., Thaisomboonsuk,B., Nisalak,A., Gibbons,R., Iamsirithaworn,S.,…	2021-04-22 21:00:00	01932/98	Dengue virus	Flavivirus	Flaviviridae	ssRNA(+)	10179	GenBank	partial		Thailand	Thailand	Homo sapiens		1998-01-01	Dengue virus type I isolate 01932/98 polyprotein (POLY) gene, complete cds
MW946126	Katzelnick,L., Escoto,A., Huang,A., Garcia-Carreras,B., Chowdhury,N., Berry,I., Chavez,C., Rutvisuttinunt,W., Buchy,P., Duong,V., Dussart,P., Gromowski,G., Macareo,L., Smith,D., Jarman,R., Whitehead,S., Salje,H., Cummings,D., Lessler,J., Melendrez,M., Endy,T., Kalanarooj,S., A-Nuegoonpipat,A., Chanama,S., Sangkijporn,S., Klungthong,C., Thaisomboonsuk,B., Nisalak,A., Gibbons,R., Iamsirithaworn,S.,…	2021-04-22 21:00:00	01088/94	Dengue virus	Flavivirus	Flaviviridae	ssRNA(+)	10179	GenBank	partial		Thailand	Thailand	Homo sapiens		1994-01-01	Dengue virus type I isolate 01088/94 polyprotein (POLY) gene, complete cds
MW946125	Katzelnick,L., Escoto,A., Huang,A., Garcia-Carreras,B., Chowdhury,N., Berry,I., Chavez,C., Rutvisuttinunt,W., Buchy,P., Duong,V., Dussart,P., Gromowski,G., Macareo,L., Smith,D., Jarman,R., Whitehead,S., Salje,H., Cummings,D., Lessler,J., Melendrez,M., Endy,T., Kalanarooj,S., A-Nuegoonpipat,A., Chanama,S., Sangkijporn,S., Klungthong,C., Thaisomboonsuk,B., Nisalak,A., Gibbons,R., Iamsirithaworn,S.,…	2021-04-22 21:00:00	05865/97	Dengue virus	Flavivirus	Flaviviridae	ssRNA(+)	10179	GenBank	partial		Thailand	Thailand	Homo sapiens		1997-01-01	Dengue virus type I isolate 05865/97 polyprotein (POLY) gene, complete cds
MW946124	Katzelnick,L., Escoto,A., Huang,A., Garcia-Carreras,B., Chowdhury,N., Berry,I., Chavez,C., Rutvisuttinunt,W., Buchy,P., Duong,V., Dussart,P., Gromowski,G., Macareo,L., Smith,D., Jarman,R., Whitehead,S., Salje,H., Cummings,D., Lessler,J., Melendrez,M., Endy,T., Kalanarooj,S., A-Nuegoonpipat,A., Chanama,S., Sangkijporn,S., Klungthong,C., Thaisomboonsuk,B., Nisalak,A., Gibbons,R., Iamsirithaworn,S.,…	2021-04-22 21:00:00	00493/11	Dengue virus	Flavivirus	Flaviviridae	ssRNA(+)	10179	GenBank	partial		Thailand	Thailand	Homo sapiens		2011-01-01	Dengue virus type I isolate 00493/11 polyprotein (POLY) gene, complete cds
MW946123	Katzelnick,L., Escoto,A., Huang,A., Garcia-Carreras,B., Chowdhury,N., Berry,I., Chavez,C., Rutvisuttinunt,W., Buchy,P., Duong,V., Dussart,P., Gromowski,G., Macareo,L., Smith,D., Jarman,R., Whitehead,S., Salje,H., Cummings,D., Lessler,J., Melendrez,M., Endy,T., Kalanarooj,S., A-Nuegoonpipat,A., Chanama,S., Sangkijporn,S., Klungthong,C., Thaisomboonsuk,B., Nisalak,A., Gibbons,R., Iamsirithaworn,S.,…	2021-04-22 21:00:00	00740/94	Dengue virus	Flavivirus	Flaviviridae	ssRNA(+)	10179	GenBank	partial		Thailand	Thailand	Homo sapiens		1994-01-01	Dengue virus type I isolate 00740/94 polyprotein (POLY) gene, complete cds
MW946122	Katzelnick,L., Escoto,A., Huang,A., Garcia-Carreras,B., Chowdhury,N., Berry,I., Chavez,C., Rutvisuttinunt,W., Buchy,P., Duong,V., Dussart,P., Gromowski,G., Macareo,L., Smith,D., Jarman,R., Whitehead,S., Salje,H., Cummings,D., Lessler,J., Melendrez,M., Endy,T., Kalanarooj,S., A-Nuegoonpipat,A., Chanama,S., Sangkijporn,S., Klungthong,C., Thaisomboonsuk,B., Nisalak,A., Gibbons,R., Iamsirithaworn,S.,…	2021-04-22 21:00:00	01524/96	Dengue virus	Flavivirus	Flaviviridae	ssRNA(+)	10179	GenBank	partial		Thailand	Thailand	Homo sapiens		1996-01-01	Dengue virus type I isolate 01524/96 polyprotein (POLY) gene, complete cds
MW946121	Katzelnick,L., Escoto,A., Huang,A., Garcia-Carreras,B., Chowdhury,N., Berry,I., Chavez,C., Rutvisuttinunt,W., Buchy,P., Duong,V., Dussart,P., Gromowski,G., Macareo,L., Smith,D., Jarman,R., Whitehead,S., Salje,H., Cummings,D., Lessler,J., Melendrez,M., Endy,T., Kalanarooj,S., A-Nuegoonpipat,A., Chanama,S., Sangkijporn,S., Klungthong,C., Thaisomboonsuk,B., Nisalak,A., Gibbons,R., Iamsirithaworn,S.,…	2021-04-22 21:00:00	00594/99	Dengue virus	Flavivirus	Flaviviridae	ssRNA(+)	10176	GenBank	partial		Thailand	Thailand	Homo sapiens		1999-01-01	Dengue virus type I isolate 00594/99 polyprotein (POLY) gene, partial cds
MW946120	Katzelnick,L., Escoto,A., Huang,A., Garcia-Carreras,B., Chowdhury,N., Berry,I., Chavez,C., Rutvisuttinunt,W., Buchy,P., Duong,V., Dussart,P., Gromowski,G., Macareo,L., Smith,D., Jarman,R., Whitehead,S., Salje,H., Cummings,D., Lessler,J., Melendrez,M., Endy,T., Kalanarooj,S., A-Nuegoonpipat,A., Chanama,S., Sangkijporn,S., Klungthong,C., Thaisomboonsuk,B., Nisalak,A., Gibbons,R., Iamsirithaworn,S.,…	2021-04-22 21:00:00	00437/82	Dengue virus	Flavivirus	Flaviviridae	ssRNA(+)	10179	GenBank	partial		Thailand	Thailand	Homo sapiens		1982-01-01	Dengue virus type I isolate 00437/82 polyprotein (POLY) gene, complete cds
MW946119	Katzelnick,L., Escoto,A., Huang,A., Garcia-Carreras,B., Chowdhury,N., Berry,I., Chavez,C., Rutvisuttinunt,W., Buchy,P., Duong,V., Dussart,P., Gromowski,G., Macareo,L., Smith,D., Jarman,R., Whitehead,S., Salje,H., Cummings,D., Lessler,J., Melendrez,M., Endy,T., Kalanarooj,S., A-Nuegoonpipat,A., Chanama,S., Sangkijporn,S., Klungthong,C., Thaisomboonsuk,B., Nisalak,A., Gibbons,R., Iamsirithaworn,S.,…	2021-04-22 21:00:00	01471/94	Dengue virus	Flavivirus	Flaviviridae	ssRNA(+)	10179	GenBank	partial		Thailand	Thailand	Homo sapiens		1994-01-01	Dengue virus type I isolate 01471/94 polyprotein (POLY) gene, complete cds
MW946118	Katzelnick,L., Escoto,A., Huang,A., Garcia-Carreras,B., Chowdhury,N., Berry,I., Chavez,C., Rutvisuttinunt,W., Buchy,P., Duong,V., Dussart,P., Gromowski,G., Macareo,L., Smith,D., Jarman,R., Whitehead,S., Salje,H., Cummings,D., Lessler,J., Melendrez,M., Endy,T., Kalanarooj,S., A-Nuegoonpipat,A., Chanama,S., Sangkijporn,S., Klungthong,C., Thaisomboonsuk,B., Nisalak,A., Gibbons,R., Iamsirithaworn,S.,…	2021-04-22 21:00:00	00607/13	Dengue virus	Flavivirus	Flaviviridae	ssRNA(+)	10179	GenBank	partial		Thailand	Thailand	Homo sapiens		2013-01-01	Dengue virus type I isolate 00607/13 polyprotein (POLY) gene, complete cds
MW946117	Katzelnick,L., Escoto,A., Huang,A., Garcia-Carreras,B., Chowdhury,N., Berry,I., Chavez,C., Rutvisuttinunt,W., Buchy,P., Duong,V., Dussart,P., Gromowski,G., Macareo,L., Smith,D., Jarman,R., Whitehead,S., Salje,H., Cummings,D., Lessler,J., Melendrez,M., Endy,T., Kalanarooj,S., A-Nuegoonpipat,A., Chanama,S., Sangkijporn,S., Klungthong,C., Thaisomboonsuk,B., Nisalak,A., Gibbons,R., Iamsirithaworn,S.,…	2021-04-22 21:00:00	02443/96	Dengue virus	Flavivirus	Flaviviridae	ssRNA(+)	10179	GenBank	partial		Thailand	Thailand	Homo sapiens		1996-01-01	Dengue virus type I isolate 02443/96 polyprotein (POLY) gene, complete cds
MW946116	Katzelnick,L., Escoto,A., Huang,A., Garcia-Carreras,B., Chowdhury,N., Berry,I., Chavez,C., Rutvisuttinunt,W., Buchy,P., Duong,V., Dussart,P., Gromowski,G., Macareo,L., Smith,D., Jarman,R., Whitehead,S., Salje,H., Cummings,D., Lessler,J., Melendrez,M., Endy,T., Kalanarooj,S., A-Nuegoonpipat,A., Chanama,S., Sangkijporn,S., Klungthong,C., Thaisomboonsuk,B., Nisalak,A., Gibbons,R., Iamsirithaworn,S.,…	2021-04-22 21:00:00	00674/06	Dengue virus	Flavivirus	Flaviviridae	ssRNA(+)	10179	GenBank	partial		Thailand	Thailand	Homo sapiens		2006-01-01	Dengue virus type I isolate 00674/06 polyprotein (POLY) gene, complete cds
MW946115	Katzelnick,L., Escoto,A., Huang,A., Garcia-Carreras,B., Chowdhury,N., Berry,I., Chavez,C., Rutvisuttinunt,W., Buchy,P., Duong,V., Dussart,P., Gromowski,G., Macareo,L., Smith,D., Jarman,R., Whitehead,S., Salje,H., Cummings,D., Lessler,J., Melendrez,M., Endy,T., Kalanarooj,S., A-Nuegoonpipat,A., Chanama,S., Sangkijporn,S., Klungthong,C., Thaisomboonsuk,B., Nisalak,A., Gibbons,R., Iamsirithaworn,S.,…	2021-04-22 21:00:00	05097/01	Dengue virus	Flavivirus	Flaviviridae	ssRNA(+)	10179	GenBank	partial		Thailand	Thailand	Homo sapiens		2001-01-01	Dengue virus type I isolate 05097/01 polyprotein (POLY) gene, complete cds
MW946114	Katzelnick,L., Escoto,A., Huang,A., Garcia-Carreras,B., Chowdhury,N., Berry,I., Chavez,C., Rutvisuttinunt,W., Buchy,P., Duong,V., Dussart,P., Gromowski,G., Macareo,L., Smith,D., Jarman,R., Whitehead,S., Salje,H., Cummings,D., Lessler,J., Melendrez,M., Endy,T., Kalanarooj,S., A-Nuegoonpipat,A., Chanama,S., Sangkijporn,S., Klungthong,C., Thaisomboonsuk,B., Nisalak,A., Gibbons,R., Iamsirithaworn,S.,…	2021-04-22 21:00:00	00600/02	Dengue virus	Flavivirus	Flaviviridae	ssRNA(+)	10179	GenBank	partial		Thailand	Thailand	Homo sapiens		2002-01-01	Dengue virus type I isolate 00600/02 polyprotein (POLY) gene, complete cds
MW946113	Katzelnick,L., Escoto,A., Huang,A., Garcia-Carreras,B., Chowdhury,N., Berry,I., Chavez,C., Rutvisuttinunt,W., Buchy,P., Duong,V., Dussart,P., Gromowski,G., Macareo,L., Smith,D., Jarman,R., Whitehead,S., Salje,H., Cummings,D., Lessler,J., Melendrez,M., Endy,T., Kalanarooj,S., A-Nuegoonpipat,A., Chanama,S., Sangkijporn,S., Klungthong,C., Thaisomboonsuk,B., Nisalak,A., Gibbons,R., Iamsirithaworn,S.,…	2021-04-22 21:00:00	02681/06	Dengue virus	Flavivirus	Flaviviridae	ssRNA(+)	10179	GenBank	partial		Thailand	Thailand	Homo sapiens		2006-01-01	Dengue virus type I isolate 02681/06 polyprotein (POLY) gene, complete cds
MW946112	Katzelnick,L., Escoto,A., Huang,A., Garcia-Carreras,B., Chowdhury,N., Berry,I., Chavez,C., Rutvisuttinunt,W., Buchy,P., Duong,V., Dussart,P., Gromowski,G., Macareo,L., Smith,D., Jarman,R., Whitehead,S., Salje,H., Cummings,D., Lessler,J., Melendrez,M., Endy,T., Kalanarooj,S., A-Nuegoonpipat,A., Chanama,S., Sangkijporn,S., Klungthong,C., Thaisomboonsuk,B., Nisalak,A., Gibbons,R., Iamsirithaworn,S.,…	2021-04-22 21:00:00	02549/06	Dengue virus	Flavivirus	Flaviviridae	ssRNA(+)	10179	GenBank	partial		Thailand	Thailand	Homo sapiens		2006-01-01	Dengue virus type I isolate 02549/06 polyprotein (POLY) gene, complete cds
MW946111	Katzelnick,L., Escoto,A., Huang,A., Garcia-Carreras,B., Chowdhury,N., Berry,I., Chavez,C., Rutvisuttinunt,W., Buchy,P., Duong,V., Dussart,P., Gromowski,G., Macareo,L., Smith,D., Jarman,R., Whitehead,S., Salje,H., Cummings,D., Lessler,J., Melendrez,M., Endy,T., Kalanarooj,S., A-Nuegoonpipat,A., Chanama,S., Sangkijporn,S., Klungthong,C., Thaisomboonsuk,B., Nisalak,A., Gibbons,R., Iamsirithaworn,S.,…	2021-04-22 21:00:00	00012/97	Dengue virus	Flavivirus	Flaviviridae	ssRNA(+)	10179	GenBank	partial		Thailand	Thailand	Homo sapiens		1997-01-01	Dengue virus type I isolate 00012/97 polyprotein (POLY) gene, complete cds
MW946110	Katzelnick,L., Escoto,A., Huang,A., Garcia-Carreras,B., Chowdhury,N., Berry,I., Chavez,C., Rutvisuttinunt,W., Buchy,P., Duong,V., Dussart,P., Gromowski,G., Macareo,L., Smith,D., Jarman,R., Whitehead,S., Salje,H., Cummings,D., Lessler,J., Melendrez,M., Endy,T., Kalanarooj,S., A-Nuegoonpipat,A., Chanama,S., Sangkijporn,S., Klungthong,C., Thaisomboonsuk,B., Nisalak,A., Gibbons,R., Iamsirithaworn,S.,…	2021-04-22 21:00:00	01521/10	Dengue virus	Flavivirus	Flaviviridae	ssRNA(+)	10179	GenBank	partial		Thailand	Thailand	Homo sapiens		2010-01-01	Dengue virus type I isolate 01521/10 polyprotein (POLY) gene, complete cds
MW946109	Katzelnick,L., Escoto,A., Huang,A., Garcia-Carreras,B., Chowdhury,N., Berry,I., Chavez,C., Rutvisuttinunt,W., Buchy,P., Duong,V., Dussart,P., Gromowski,G., Macareo,L., Smith,D., Jarman,R., Whitehead,S., Salje,H., Cummings,D., Lessler,J., Melendrez,M., Endy,T., Kalanarooj,S., A-Nuegoonpipat,A., Chanama,S., Sangkijporn,S., Klungthong,C., Thaisomboonsuk,B., Nisalak,A., Gibbons,R., Iamsirithaworn,S.,…	2021-04-22 21:00:00	01023/03	Dengue virus	Flavivirus	Flaviviridae	ssRNA(+)	10179	GenBank	partial		Thailand	Thailand	Homo sapiens		2003-01-01	Dengue virus type I isolate 01023/03 polyprotein (POLY) gene, complete cds
MW946108	Katzelnick,L., Escoto,A., Huang,A., Garcia-Carreras,B., Chowdhury,N., Berry,I., Chavez,C., Rutvisuttinunt,W., Buchy,P., Duong,V., Dussart,P., Gromowski,G., Macareo,L., Smith,D., Jarman,R., Whitehead,S., Salje,H., Cummings,D., Lessler,J., Melendrez,M., Endy,T., Kalanarooj,S., A-Nuegoonpipat,A., Chanama,S., Sangkijporn,S., Klungthong,C., Thaisomboonsuk,B., Nisalak,A., Gibbons,R., Iamsirithaworn,S.,…	2021-04-22 21:00:00	00047/01	Dengue virus	Flavivirus	Flaviviridae	ssRNA(+)	10179	GenBank	partial		Thailand	Thailand	Homo sapiens		2001-01-01	Dengue virus type I isolate 00047/01 polyprotein (POLY) gene, complete cds
MW946107	Katzelnick,L., Escoto,A., Huang,A., Garcia-Carreras,B., Chowdhury,N., Berry,I., Chavez,C., Rutvisuttinunt,W., Buchy,P., Duong,V., Dussart,P., Gromowski,G., Macareo,L., Smith,D., Jarman,R., Whitehead,S., Salje,H., Cummings,D., Lessler,J., Melendrez,M., Endy,T., Kalanarooj,S., A-Nuegoonpipat,A., Chanama,S., Sangkijporn,S., Klungthong,C., Thaisomboonsuk,B., Nisalak,A., Gibbons,R., Iamsirithaworn,S.,…	2021-04-22 21:00:00	00188/06	Dengue virus	Flavivirus	Flaviviridae	ssRNA(+)	10179	GenBank	partial		Thailand	Thailand	Homo sapiens		2006-01-01	Dengue virus type I isolate 00188/06 polyprotein (POLY) gene, complete cds
MW946106	Katzelnick,L., Escoto,A., Huang,A., Garcia-Carreras,B., Chowdhury,N., Berry,I., Chavez,C., Rutvisuttinunt,W., Buchy,P., Duong,V., Dussart,P., Gromowski,G., Macareo,L., Smith,D., Jarman,R., Whitehead,S., Salje,H., Cummings,D., Lessler,J., Melendrez,M., Endy,T., Kalanarooj,S., A-Nuegoonpipat,A., Chanama,S., Sangkijporn,S., Klungthong,C., Thaisomboonsuk,B., Nisalak,A., Gibbons,R., Iamsirithaworn,S.,…	2021-04-22 21:00:00	01462/02	Dengue virus	Flavivirus	Flaviviridae	ssRNA(+)	10179	GenBank	partial		Thailand	Thailand	Homo sapiens		2002-01-01	Dengue virus type I isolate 01462/02 polyprotein (POLY) gene, complete cds
MW946105	Katzelnick,L., Escoto,A., Huang,A., Garcia-Carreras,B., Chowdhury,N., Berry,I., Chavez,C., Rutvisuttinunt,W., Buchy,P., Duong,V., Dussart,P., Gromowski,G., Macareo,L., Smith,D., Jarman,R., Whitehead,S., Salje,H., Cummings,D., Lessler,J., Melendrez,M., Endy,T., Kalanarooj,S., A-Nuegoonpipat,A., Chanama,S., Sangkijporn,S., Klungthong,C., Thaisomboonsuk,B., Nisalak,A., Gibbons,R., Iamsirithaworn,S.,…	2021-04-22 21:00:00	02730/06	Dengue virus	Flavivirus	Flaviviridae	ssRNA(+)	10179	GenBank	partial		Thailand	Thailand	Homo sapiens		2006-01-01	Dengue virus type I isolate 02730/06 polyprotein (POLY) gene, complete cds
MW946104	Katzelnick,L., Escoto,A., Huang,A., Garcia-Carreras,B., Chowdhury,N., Berry,I., Chavez,C., Rutvisuttinunt,W., Buchy,P., Duong,V., Dussart,P., Gromowski,G., Macareo,L., Smith,D., Jarman,R., Whitehead,S., Salje,H., Cummings,D., Lessler,J., Melendrez,M., Endy,T., Kalanarooj,S., A-Nuegoonpipat,A., Chanama,S., Sangkijporn,S., Klungthong,C., Thaisomboonsuk,B., Nisalak,A., Gibbons,R., Iamsirithaworn,S.,…	2021-04-22 21:00:00	30295/95	Dengue virus	Flavivirus	Flaviviridae	ssRNA(+)	10179	GenBank	partial		Thailand	Thailand	Homo sapiens		1995-01-01	Dengue virus type I isolate 30295/95 polyprotein (POLY) gene, complete cds
MW946103	Katzelnick,L., Escoto,A., Huang,A., Garcia-Carreras,B., Chowdhury,N., Berry,I., Chavez,C., Rutvisuttinunt,W., Buchy,P., Duong,V., Dussart,P., Gromowski,G., Macareo,L., Smith,D., Jarman,R., Whitehead,S., Salje,H., Cummings,D., Lessler,J., Melendrez,M., Endy,T., Kalanarooj,S., A-Nuegoonpipat,A., Chanama,S., Sangkijporn,S., Klungthong,C., Thaisomboonsuk,B., Nisalak,A., Gibbons,R., Iamsirithaworn,S.,…	2021-04-22 21:00:00	00382/97	Dengue virus	Flavivirus	Flaviviridae	ssRNA(+)	10179	GenBank	partial		Thailand	Thailand	Homo sapiens		1997-01-01	Dengue virus type I isolate 00382/97 polyprotein (POLY) gene, complete cds
MW946102	Katzelnick,L., Escoto,A., Huang,A., Garcia-Carreras,B., Chowdhury,N., Berry,I., Chavez,C., Rutvisuttinunt,W., Buchy,P., Duong,V., Dussart,P., Gromowski,G., Macareo,L., Smith,D., Jarman,R., Whitehead,S., Salje,H., Cummings,D., Lessler,J., Melendrez,M., Endy,T., Kalanarooj,S., A-Nuegoonpipat,A., Chanama,S., Sangkijporn,S., Klungthong,C., Thaisomboonsuk,B., Nisalak,A., Gibbons,R., Iamsirithaworn,S.,…	2021-04-22 21:00:00	30620/94	Dengue virus	Flavivirus	Flaviviridae	ssRNA(+)	10179	GenBank	partial		Thailand	Thailand	Homo sapiens		1994-01-01	Dengue virus type I isolate 30620/94 polyprotein (POLY) gene, complete cds
MW946101	Katzelnick,L., Escoto,A., Huang,A., Garcia-Carreras,B., Chowdhury,N., Berry,I., Chavez,C., Rutvisuttinunt,W., Buchy,P., Duong,V., Dussart,P., Gromowski,G., Macareo,L., Smith,D., Jarman,R., Whitehead,S., Salje,H., Cummings,D., Lessler,J., Melendrez,M., Endy,T., Kalanarooj,S., A-Nuegoonpipat,A., Chanama,S., Sangkijporn,S., Klungthong,C., Thaisomboonsuk,B., Nisalak,A., Gibbons,R., Iamsirithaworn,S.,…	2021-04-22 21:00:00	00637/95	Dengue virus	Flavivirus	Flaviviridae	ssRNA(+)	10179	GenBank	partial		Thailand	Thailand	Homo sapiens		1995-01-01	Dengue virus type I isolate 00637/95 polyprotein (POLY) gene, complete cds
MW946100	Katzelnick,L., Escoto,A., Huang,A., Garcia-Carreras,B., Chowdhury,N., Berry,I., Chavez,C., Rutvisuttinunt,W., Buchy,P., Duong,V., Dussart,P., Gromowski,G., Macareo,L., Smith,D., Jarman,R., Whitehead,S., Salje,H., Cummings,D., Lessler,J., Melendrez,M., Endy,T., Kalanarooj,S., A-Nuegoonpipat,A., Chanama,S., Sangkijporn,S., Klungthong,C., Thaisomboonsuk,B., Nisalak,A., Gibbons,R., Iamsirithaworn,S.,…	2021-04-22 21:00:00	30174/94	Dengue virus	Flavivirus	Flaviviridae	ssRNA(+)	10179	GenBank	partial		Thailand	Thailand	Homo sapiens		1994-01-01	Dengue virus type I isolate 30174/94 polyprotein (POLY) gene, complete cds
MW946099	Katzelnick,L., Escoto,A., Huang,A., Garcia-Carreras,B., Chowdhury,N., Berry,I., Chavez,C., Rutvisuttinunt,W., Buchy,P., Duong,V., Dussart,P., Gromowski,G., Macareo,L., Smith,D., Jarman,R., Whitehead,S., Salje,H., Cummings,D., Lessler,J., Melendrez,M., Endy,T., Kalanarooj,S., A-Nuegoonpipat,A., Chanama,S., Sangkijporn,S., Klungthong,C., Thaisomboonsuk,B., Nisalak,A., Gibbons,R., Iamsirithaworn,S.,…	2021-04-22 21:00:00	00377/97	Dengue virus	Flavivirus	Flaviviridae	ssRNA(+)	10179	GenBank	partial		Thailand	Thailand	Homo sapiens		1997-01-01	Dengue virus type I isolate 00377/97 polyprotein (POLY) gene, complete cds
MW946098	Katzelnick,L., Escoto,A., Huang,A., Garcia-Carreras,B., Chowdhury,N., Berry,I., Chavez,C., Rutvisuttinunt,W., Buchy,P., Duong,V., Dussart,P., Gromowski,G., Macareo,L., Smith,D., Jarman,R., Whitehead,S., Salje,H., Cummings,D., Lessler,J., Melendrez,M., Endy,T., Kalanarooj,S., A-Nuegoonpipat,A., Chanama,S., Sangkijporn,S., Klungthong,C., Thaisomboonsuk,B., Nisalak,A., Gibbons,R., Iamsirithaworn,S.,…	2021-04-22 21:00:00	30778/94	Dengue virus	Flavivirus	Flaviviridae	ssRNA(+)	10179	GenBank	partial		Thailand	Thailand	Homo sapiens		1994-01-01	Dengue virus type I isolate 30778/94 polyprotein (POLY) gene, complete cds
MW946097	Katzelnick,L., Escoto,A., Huang,A., Garcia-Carreras,B., Chowdhury,N., Berry,I., Chavez,C., Rutvisuttinunt,W., Buchy,P., Duong,V., Dussart,P., Gromowski,G., Macareo,L., Smith,D., Jarman,R., Whitehead,S., Salje,H., Cummings,D., Lessler,J., Melendrez,M., Endy,T., Kalanarooj,S., A-Nuegoonpipat,A., Chanama,S., Sangkijporn,S., Klungthong,C., Thaisomboonsuk,B., Nisalak,A., Gibbons,R., Iamsirithaworn,S.,…	2021-04-22 21:00:00	00186/05	Dengue virus	Flavivirus	Flaviviridae	ssRNA(+)	10179	GenBank	partial		Thailand	Thailand	Homo sapiens		2005-01-01	Dengue virus type I isolate 00186/05 polyprotein (POLY) gene, complete cds
MW946096	Katzelnick,L., Escoto,A., Huang,A., Garcia-Carreras,B., Chowdhury,N., Berry,I., Chavez,C., Rutvisuttinunt,W., Buchy,P., Duong,V., Dussart,P., Gromowski,G., Macareo,L., Smith,D., Jarman,R., Whitehead,S., Salje,H., Cummings,D., Lessler,J., Melendrez,M., Endy,T., Kalanarooj,S., A-Nuegoonpipat,A., Chanama,S., Sangkijporn,S., Klungthong,C., Thaisomboonsuk,B., Nisalak,A., Gibbons,R., Iamsirithaworn,S.,…	2021-04-22 21:00:00	01600/10	Dengue virus	Flavivirus	Flaviviridae	ssRNA(+)	10179	GenBank	partial		Thailand	Thailand	Homo sapiens		2010-01-01	Dengue virus type I isolate 01600/10 polyprotein (POLY) gene, complete cds
MW946095	Katzelnick,L., Escoto,A., Huang,A., Garcia-Carreras,B., Chowdhury,N., Berry,I., Chavez,C., Rutvisuttinunt,W., Buchy,P., Duong,V., Dussart,P., Gromowski,G., Macareo,L., Smith,D., Jarman,R., Whitehead,S., Salje,H., Cummings,D., Lessler,J., Melendrez,M., Endy,T., Kalanarooj,S., A-Nuegoonpipat,A., Chanama,S., Sangkijporn,S., Klungthong,C., Thaisomboonsuk,B., Nisalak,A., Gibbons,R., Iamsirithaworn,S.,…	2021-04-22 21:00:00	00369/06	Dengue virus	Flavivirus	Flaviviridae	ssRNA(+)	10179	GenBank	partial		Thailand	Thailand	Homo sapiens		2006-01-01	Dengue virus type I isolate 00369/06 polyprotein (POLY) gene, complete cds
MW946094	Katzelnick,L., Escoto,A., Huang,A., Garcia-Carreras,B., Chowdhury,N., Berry,I., Chavez,C., Rutvisuttinunt,W., Buchy,P., Duong,V., Dussart,P., Gromowski,G., Macareo,L., Smith,D., Jarman,R., Whitehead,S., Salje,H., Cummings,D., Lessler,J., Melendrez,M., Endy,T., Kalanarooj,S., A-Nuegoonpipat,A., Chanama,S., Sangkijporn,S., Klungthong,C., Thaisomboonsuk,B., Nisalak,A., Gibbons,R., Iamsirithaworn,S.,…	2021-04-22 21:00:00	01133/12	Dengue virus	Flavivirus	Flaviviridae	ssRNA(+)	10179	GenBank	partial		Thailand	Thailand	Homo sapiens		2012-01-01	Dengue virus type I isolate 01133/12 polyprotein (POLY) gene, complete cds
MW946093	Katzelnick,L., Escoto,A., Huang,A., Garcia-Carreras,B., Chowdhury,N., Berry,I., Chavez,C., Rutvisuttinunt,W., Buchy,P., Duong,V., Dussart,P., Gromowski,G., Macareo,L., Smith,D., Jarman,R., Whitehead,S., Salje,H., Cummings,D., Lessler,J., Melendrez,M., Endy,T., Kalanarooj,S., A-Nuegoonpipat,A., Chanama,S., Sangkijporn,S., Klungthong,C., Thaisomboonsuk,B., Nisalak,A., Gibbons,R., Iamsirithaworn,S.,…	2021-04-22 21:00:00	01231/96	Dengue virus	Flavivirus	Flaviviridae	ssRNA(+)	10179	GenBank	partial		Thailand	Thailand	Homo sapiens		1996-01-01	Dengue virus type I isolate 01231/96 polyprotein (POLY) gene, complete cds
MW946092	Katzelnick,L., Escoto,A., Huang,A., Garcia-Carreras,B., Chowdhury,N., Berry,I., Chavez,C., Rutvisuttinunt,W., Buchy,P., Duong,V., Dussart,P., Gromowski,G., Macareo,L., Smith,D., Jarman,R., Whitehead,S., Salje,H., Cummings,D., Lessler,J., Melendrez,M., Endy,T., Kalanarooj,S., A-Nuegoonpipat,A., Chanama,S., Sangkijporn,S., Klungthong,C., Thaisomboonsuk,B., Nisalak,A., Gibbons,R., Iamsirithaworn,S.,…	2021-04-22 21:00:00	03334/01	Dengue virus	Flavivirus	Flaviviridae	ssRNA(+)	10179	GenBank	partial		Thailand	Thailand	Homo sapiens		2001-01-01	Dengue virus type I isolate 03334/01 polyprotein (POLY) gene, complete cds
MW946091	Katzelnick,L., Escoto,A., Huang,A., Garcia-Carreras,B., Chowdhury,N., Berry,I., Chavez,C., Rutvisuttinunt,W., Buchy,P., Duong,V., Dussart,P., Gromowski,G., Macareo,L., Smith,D., Jarman,R., Whitehead,S., Salje,H., Cummings,D., Lessler,J., Melendrez,M., Endy,T., Kalanarooj,S., A-Nuegoonpipat,A., Chanama,S., Sangkijporn,S., Klungthong,C., Thaisomboonsuk,B., Nisalak,A., Gibbons,R., Iamsirithaworn,S.,…	2021-04-22 21:00:00	01789/96	Dengue virus	Flavivirus	Flaviviridae	ssRNA(+)	10179	GenBank	partial		Thailand	Thailand	Homo sapiens		1996-01-01	Dengue virus type I isolate 01789/96 polyprotein (POLY) gene, complete cds
MW946090	Katzelnick,L., Escoto,A., Huang,A., Garcia-Carreras,B., Chowdhury,N., Berry,I., Chavez,C., Rutvisuttinunt,W., Buchy,P., Duong,V., Dussart,P., Gromowski,G., Macareo,L., Smith,D., Jarman,R., Whitehead,S., Salje,H., Cummings,D., Lessler,J., Melendrez,M., Endy,T., Kalanarooj,S., A-Nuegoonpipat,A., Chanama,S., Sangkijporn,S., Klungthong,C., Thaisomboonsuk,B., Nisalak,A., Gibbons,R., Iamsirithaworn,S.,…	2021-04-22 21:00:00	05411/00	Dengue virus	Flavivirus	Flaviviridae	ssRNA(+)	10179	GenBank	partial		Thailand	Thailand	Homo sapiens		2000-01-01	Dengue virus type I isolate 05411/00 polyprotein (POLY) gene, complete cds
MW946089	Katzelnick,L., Escoto,A., Huang,A., Garcia-Carreras,B., Chowdhury,N., Berry,I., Chavez,C., Rutvisuttinunt,W., Buchy,P., Duong,V., Dussart,P., Gromowski,G., Macareo,L., Smith,D., Jarman,R., Whitehead,S., Salje,H., Cummings,D., Lessler,J., Melendrez,M., Endy,T., Kalanarooj,S., A-Nuegoonpipat,A., Chanama,S., Sangkijporn,S., Klungthong,C., Thaisomboonsuk,B., Nisalak,A., Gibbons,R., Iamsirithaworn,S.,…	2021-04-22 21:00:00	00743/05	Dengue virus	Flavivirus	Flaviviridae	ssRNA(+)	10179	GenBank	partial		Thailand	Thailand	Homo sapiens		2005-01-01	Dengue virus type I isolate 00743/05 polyprotein (POLY) gene, complete cds
MW946088	Katzelnick,L., Escoto,A., Huang,A., Garcia-Carreras,B., Chowdhury,N., Berry,I., Chavez,C., Rutvisuttinunt,W., Buchy,P., Duong,V., Dussart,P., Gromowski,G., Macareo,L., Smith,D., Jarman,R., Whitehead,S., Salje,H., Cummings,D., Lessler,J., Melendrez,M., Endy,T., Kalanarooj,S., A-Nuegoonpipat,A., Chanama,S., Sangkijporn,S., Klungthong,C., Thaisomboonsuk,B., Nisalak,A., Gibbons,R., Iamsirithaworn,S.,…	2021-04-22 21:00:00	03440/99	Dengue virus	Flavivirus	Flaviviridae	ssRNA(+)	10179	GenBank	partial		Thailand	Thailand	Homo sapiens		1999-01-01	Dengue virus type I isolate 03440/99 polyprotein (POLY) gene, complete cds
MW946087	Katzelnick,L., Escoto,A., Huang,A., Garcia-Carreras,B., Chowdhury,N., Berry,I., Chavez,C., Rutvisuttinunt,W., Buchy,P., Duong,V., Dussart,P., Gromowski,G., Macareo,L., Smith,D., Jarman,R., Whitehead,S., Salje,H., Cummings,D., Lessler,J., Melendrez,M., Endy,T., Kalanarooj,S., A-Nuegoonpipat,A., Chanama,S., Sangkijporn,S., Klungthong,C., Thaisomboonsuk,B., Nisalak,A., Gibbons,R., Iamsirithaworn,S.,…	2021-04-22 21:00:00	00543/12	Dengue virus	Flavivirus	Flaviviridae	ssRNA(+)	10179	GenBank	partial		Thailand	Thailand	Homo sapiens		2012-01-01	Dengue virus type I isolate 00543/12 polyprotein (POLY) gene, complete cds
MW946086	Katzelnick,L., Escoto,A., Huang,A., Garcia-Carreras,B., Chowdhury,N., Berry,I., Chavez,C., Rutvisuttinunt,W., Buchy,P., Duong,V., Dussart,P., Gromowski,G., Macareo,L., Smith,D., Jarman,R., Whitehead,S., Salje,H., Cummings,D., Lessler,J., Melendrez,M., Endy,T., Kalanarooj,S., A-Nuegoonpipat,A., Chanama,S., Sangkijporn,S., Klungthong,C., Thaisomboonsuk,B., Nisalak,A., Gibbons,R., Iamsirithaworn,S.,…	2021-04-22 21:00:00	30182/94	Dengue virus	Flavivirus	Flaviviridae	ssRNA(+)	10179	GenBank	partial		Thailand	Thailand	Homo sapiens		1994-01-01	Dengue virus type I isolate 30182/94 polyprotein (POLY) gene, complete cds
MW946085	Katzelnick,L., Escoto,A., Huang,A., Garcia-Carreras,B., Chowdhury,N., Berry,I., Chavez,C., Rutvisuttinunt,W., Buchy,P., Duong,V., Dussart,P., Gromowski,G., Macareo,L., Smith,D., Jarman,R., Whitehead,S., Salje,H., Cummings,D., Lessler,J., Melendrez,M., Endy,T., Kalanarooj,S., A-Nuegoonpipat,A., Chanama,S., Sangkijporn,S., Klungthong,C., Thaisomboonsuk,B., Nisalak,A., Gibbons,R., Iamsirithaworn,S.,…	2021-04-22 21:00:00	00650/02	Dengue virus	Flavivirus	Flaviviridae	ssRNA(+)	10179	GenBank	partial		Thailand	Thailand	Homo sapiens		2002-01-01	Dengue virus type I isolate 00650/02 polyprotein (POLY) gene, complete cds
MW946084	Katzelnick,L., Escoto,A., Huang,A., Garcia-Carreras,B., Chowdhury,N., Berry,I., Chavez,C., Rutvisuttinunt,W., Buchy,P., Duong,V., Dussart,P., Gromowski,G., Macareo,L., Smith,D., Jarman,R., Whitehead,S., Salje,H., Cummings,D., Lessler,J., Melendrez,M., Endy,T., Kalanarooj,S., A-Nuegoonpipat,A., Chanama,S., Sangkijporn,S., Klungthong,C., Thaisomboonsuk,B., Nisalak,A., Gibbons,R., Iamsirithaworn,S.,…	2021-04-22 21:00:00	02634/06	Dengue virus	Flavivirus	Flaviviridae	ssRNA(+)	10179	GenBank	partial		Thailand	Thailand	Homo sapiens		2006-01-01	Dengue virus type I isolate 02634/06 polyprotein (POLY) gene, complete cds
MW946083	Katzelnick,L., Escoto,A., Huang,A., Garcia-Carreras,B., Chowdhury,N., Berry,I., Chavez,C., Rutvisuttinunt,W., Buchy,P., Duong,V., Dussart,P., Gromowski,G., Macareo,L., Smith,D., Jarman,R., Whitehead,S., Salje,H., Cummings,D., Lessler,J., Melendrez,M., Endy,T., Kalanarooj,S., A-Nuegoonpipat,A., Chanama,S., Sangkijporn,S., Klungthong,C., Thaisomboonsuk,B., Nisalak,A., Gibbons,R., Iamsirithaworn,S.,…	2021-04-22 21:00:00	05390/99	Dengue virus	Flavivirus	Flaviviridae	ssRNA(+)	10179	GenBank	partial		Thailand	Thailand	Homo sapiens		1999-01-01	Dengue virus type I isolate 05390/99 polyprotein (POLY) gene, complete cds
MW946082	Katzelnick,L., Escoto,A., Huang,A., Garcia-Carreras,B., Chowdhury,N., Berry,I., Chavez,C., Rutvisuttinunt,W., Buchy,P., Duong,V., Dussart,P., Gromowski,G., Macareo,L., Smith,D., Jarman,R., Whitehead,S., Salje,H., Cummings,D., Lessler,J., Melendrez,M., Endy,T., Kalanarooj,S., A-Nuegoonpipat,A., Chanama,S., Sangkijporn,S., Klungthong,C., Thaisomboonsuk,B., Nisalak,A., Gibbons,R., Iamsirithaworn,S.,…	2021-04-22 21:00:00	00614/95	Dengue virus	Flavivirus	Flaviviridae	ssRNA(+)	10179	GenBank	partial		Thailand	Thailand	Homo sapiens		1995-01-01	Dengue virus type I isolate 00614/95 polyprotein (POLY) gene, complete cds
MW946081	Katzelnick,L., Escoto,A., Huang,A., Garcia-Carreras,B., Chowdhury,N., Berry,I., Chavez,C., Rutvisuttinunt,W., Buchy,P., Duong,V., Dussart,P., Gromowski,G., Macareo,L., Smith,D., Jarman,R., Whitehead,S., Salje,H., Cummings,D., Lessler,J., Melendrez,M., Endy,T., Kalanarooj,S., A-Nuegoonpipat,A., Chanama,S., Sangkijporn,S., Klungthong,C., Thaisomboonsuk,B., Nisalak,A., Gibbons,R., Iamsirithaworn,S.,…	2021-04-22 21:00:00	01764/04	Dengue virus	Flavivirus	Flaviviridae	ssRNA(+)	10179	GenBank	partial		Thailand	Thailand	Homo sapiens		2004-01-01	Dengue virus type I isolate 01764/04 polyprotein (POLY) gene, complete cds
MW946080	Katzelnick,L., Escoto,A., Huang,A., Garcia-Carreras,B., Chowdhury,N., Berry,I., Chavez,C., Rutvisuttinunt,W., Buchy,P., Duong,V., Dussart,P., Gromowski,G., Macareo,L., Smith,D., Jarman,R., Whitehead,S., Salje,H., Cummings,D., Lessler,J., Melendrez,M., Endy,T., Kalanarooj,S., A-Nuegoonpipat,A., Chanama,S., Sangkijporn,S., Klungthong,C., Thaisomboonsuk,B., Nisalak,A., Gibbons,R., Iamsirithaworn,S.,…	2021-04-22 21:00:00	01202/11	Dengue virus	Flavivirus	Flaviviridae	ssRNA(+)	10179	GenBank	partial		Thailand	Thailand	Homo sapiens		2011-01-01	Dengue virus type I isolate 01202/11 polyprotein (POLY) gene, complete cds
MW946079	Katzelnick,L., Escoto,A., Huang,A., Garcia-Carreras,B., Chowdhury,N., Berry,I., Chavez,C., Rutvisuttinunt,W., Buchy,P., Duong,V., Dussart,P., Gromowski,G., Macareo,L., Smith,D., Jarman,R., Whitehead,S., Salje,H., Cummings,D., Lessler,J., Melendrez,M., Endy,T., Kalanarooj,S., A-Nuegoonpipat,A., Chanama,S., Sangkijporn,S., Klungthong,C., Thaisomboonsuk,B., Nisalak,A., Gibbons,R., Iamsirithaworn,S.,…	2021-04-22 21:00:00	01738/80	Dengue virus	Flavivirus	Flaviviridae	ssRNA(+)	10179	GenBank	partial		Thailand	Thailand	Homo sapiens		1980-01-01	Dengue virus type I isolate 01738/80 polyprotein (POLY) gene, complete cds
MW946078	Katzelnick,L., Escoto,A., Huang,A., Garcia-Carreras,B., Chowdhury,N., Berry,I., Chavez,C., Rutvisuttinunt,W., Buchy,P., Duong,V., Dussart,P., Gromowski,G., Macareo,L., Smith,D., Jarman,R., Whitehead,S., Salje,H., Cummings,D., Lessler,J., Melendrez,M., Endy,T., Kalanarooj,S., A-Nuegoonpipat,A., Chanama,S., Sangkijporn,S., Klungthong,C., Thaisomboonsuk,B., Nisalak,A., Gibbons,R., Iamsirithaworn,S.,…	2021-04-22 21:00:00	00059/13	Dengue virus	Flavivirus	Flaviviridae	ssRNA(+)	10179	GenBank	partial		Thailand	Thailand	Homo sapiens		2013-01-01	Dengue virus type I isolate 00059/13 polyprotein (POLY) gene, complete cds
MW946077	Katzelnick,L., Escoto,A., Huang,A., Garcia-Carreras,B., Chowdhury,N., Berry,I., Chavez,C., Rutvisuttinunt,W., Buchy,P., Duong,V., Dussart,P., Gromowski,G., Macareo,L., Smith,D., Jarman,R., Whitehead,S., Salje,H., Cummings,D., Lessler,J., Melendrez,M., Endy,T., Kalanarooj,S., A-Nuegoonpipat,A., Chanama,S., Sangkijporn,S., Klungthong,C., Thaisomboonsuk,B., Nisalak,A., Gibbons,R., Iamsirithaworn,S.,…	2021-04-22 21:00:00	00002/11	Dengue virus	Flavivirus	Flaviviridae	ssRNA(+)	10179	GenBank	partial		Thailand	Thailand	Homo sapiens		2011-01-01	Dengue virus type I isolate 00002/11 polyprotein (POLY) gene, complete cds
MW946076	Katzelnick,L., Escoto,A., Huang,A., Garcia-Carreras,B., Chowdhury,N., Berry,I., Chavez,C., Rutvisuttinunt,W., Buchy,P., Duong,V., Dussart,P., Gromowski,G., Macareo,L., Smith,D., Jarman,R., Whitehead,S., Salje,H., Cummings,D., Lessler,J., Melendrez,M., Endy,T., Kalanarooj,S., A-Nuegoonpipat,A., Chanama,S., Sangkijporn,S., Klungthong,C., Thaisomboonsuk,B., Nisalak,A., Gibbons,R., Iamsirithaworn,S.,…	2021-04-22 21:00:00	05491/01	Dengue virus	Flavivirus	Flaviviridae	ssRNA(+)	10179	GenBank	partial		Thailand	Thailand	Homo sapiens		2001-01-01	Dengue virus type I isolate 05491/01 polyprotein (POLY) gene, complete cds
MW946075	Katzelnick,L., Escoto,A., Huang,A., Garcia-Carreras,B., Chowdhury,N., Berry,I., Chavez,C., Rutvisuttinunt,W., Buchy,P., Duong,V., Dussart,P., Gromowski,G., Macareo,L., Smith,D., Jarman,R., Whitehead,S., Salje,H., Cummings,D., Lessler,J., Melendrez,M., Endy,T., Kalanarooj,S., A-Nuegoonpipat,A., Chanama,S., Sangkijporn,S., Klungthong,C., Thaisomboonsuk,B., Nisalak,A., Gibbons,R., Iamsirithaworn,S.,…	2021-04-22 21:00:00	01040/10	Dengue virus	Flavivirus	Flaviviridae	ssRNA(+)	10179	GenBank	partial		Thailand	Thailand	Homo sapiens		2010-01-01	Dengue virus type I isolate 01040/10 polyprotein (POLY) gene, complete cds
MW946074	Katzelnick,L., Escoto,A., Huang,A., Garcia-Carreras,B., Chowdhury,N., Berry,I., Chavez,C., Rutvisuttinunt,W., Buchy,P., Duong,V., Dussart,P., Gromowski,G., Macareo,L., Smith,D., Jarman,R., Whitehead,S., Salje,H., Cummings,D., Lessler,J., Melendrez,M., Endy,T., Kalanarooj,S., A-Nuegoonpipat,A., Chanama,S., Sangkijporn,S., Klungthong,C., Thaisomboonsuk,B., Nisalak,A., Gibbons,R., Iamsirithaworn,S.,…	2021-04-22 21:00:00	02676/06	Dengue virus	Flavivirus	Flaviviridae	ssRNA(+)	10179	GenBank	partial		Thailand	Thailand	Homo sapiens		2006-01-01	Dengue virus type I isolate 02676/06 polyprotein (POLY) gene, complete cds
MW946073	Katzelnick,L., Escoto,A., Huang,A., Garcia-Carreras,B., Chowdhury,N., Berry,I., Chavez,C., Rutvisuttinunt,W., Buchy,P., Duong,V., Dussart,P., Gromowski,G., Macareo,L., Smith,D., Jarman,R., Whitehead,S., Salje,H., Cummings,D., Lessler,J., Melendrez,M., Endy,T., Kalanarooj,S., A-Nuegoonpipat,A., Chanama,S., Sangkijporn,S., Klungthong,C., Thaisomboonsuk,B., Nisalak,A., Gibbons,R., Iamsirithaworn,S.,…	2021-04-22 21:00:00	06069/00	Dengue virus	Flavivirus	Flaviviridae	ssRNA(+)	10179	GenBank	partial		Thailand	Thailand	Homo sapiens		2000-01-01	Dengue virus type I isolate 06069/00 polyprotein (POLY) gene, complete cds
MW946072	Katzelnick,L., Escoto,A., Huang,A., Garcia-Carreras,B., Chowdhury,N., Berry,I., Chavez,C., Rutvisuttinunt,W., Buchy,P., Duong,V., Dussart,P., Gromowski,G., Macareo,L., Smith,D., Jarman,R., Whitehead,S., Salje,H., Cummings,D., Lessler,J., Melendrez,M., Endy,T., Kalanarooj,S., A-Nuegoonpipat,A., Chanama,S., Sangkijporn,S., Klungthong,C., Thaisomboonsuk,B., Nisalak,A., Gibbons,R., Iamsirithaworn,S.,…	2021-04-22 21:00:00	00975/04	Dengue virus	Flavivirus	Flaviviridae	ssRNA(+)	10179	GenBank	partial		Thailand	Thailand	Homo sapiens		2004-01-01	Dengue virus type I isolate 00975/04 polyprotein (POLY) gene, complete cds
MW946071	Katzelnick,L., Escoto,A., Huang,A., Garcia-Carreras,B., Chowdhury,N., Berry,I., Chavez,C., Rutvisuttinunt,W., Buchy,P., Duong,V., Dussart,P., Gromowski,G., Macareo,L., Smith,D., Jarman,R., Whitehead,S., Salje,H., Cummings,D., Lessler,J., Melendrez,M., Endy,T., Kalanarooj,S., A-Nuegoonpipat,A., Chanama,S., Sangkijporn,S., Klungthong,C., Thaisomboonsuk,B., Nisalak,A., Gibbons,R., Iamsirithaworn,S.,…	2021-04-22 21:00:00	00942/96	Dengue virus	Flavivirus	Flaviviridae	ssRNA(+)	10179	GenBank	partial		Thailand	Thailand	Homo sapiens		1996-01-01	Dengue virus type I isolate 00942/96 polyprotein (POLY) gene, complete cds
MW946070	Katzelnick,L., Escoto,A., Huang,A., Garcia-Carreras,B., Chowdhury,N., Berry,I., Chavez,C., Rutvisuttinunt,W., Buchy,P., Duong,V., Dussart,P., Gromowski,G., Macareo,L., Smith,D., Jarman,R., Whitehead,S., Salje,H., Cummings,D., Lessler,J., Melendrez,M., Endy,T., Kalanarooj,S., A-Nuegoonpipat,A., Chanama,S., Sangkijporn,S., Klungthong,C., Thaisomboonsuk,B., Nisalak,A., Gibbons,R., Iamsirithaworn,S.,…	2021-04-22 21:00:00	02677/06	Dengue virus	Flavivirus	Flaviviridae	ssRNA(+)	10179	GenBank	partial		Thailand	Thailand	Homo sapiens		2006-01-01	Dengue virus type I isolate 02677/06 polyprotein (POLY) gene, complete cds
MW946069	Katzelnick,L., Escoto,A., Huang,A., Garcia-Carreras,B., Chowdhury,N., Berry,I., Chavez,C., Rutvisuttinunt,W., Buchy,P., Duong,V., Dussart,P., Gromowski,G., Macareo,L., Smith,D., Jarman,R., Whitehead,S., Salje,H., Cummings,D., Lessler,J., Melendrez,M., Endy,T., Kalanarooj,S., A-Nuegoonpipat,A., Chanama,S., Sangkijporn,S., Klungthong,C., Thaisomboonsuk,B., Nisalak,A., Gibbons,R., Iamsirithaworn,S.,…	2021-04-22 21:00:00	04348/99	Dengue virus	Flavivirus	Flaviviridae	ssRNA(+)	10179	GenBank	partial		Thailand	Thailand	Homo sapiens		1999-01-01	Dengue virus type I isolate 04348/99 polyprotein (POLY) gene, complete cds
MW946068	Katzelnick,L., Escoto,A., Huang,A., Garcia-Carreras,B., Chowdhury,N., Berry,I., Chavez,C., Rutvisuttinunt,W., Buchy,P., Duong,V., Dussart,P., Gromowski,G., Macareo,L., Smith,D., Jarman,R., Whitehead,S., Salje,H., Cummings,D., Lessler,J., Melendrez,M., Endy,T., Kalanarooj,S., A-Nuegoonpipat,A., Chanama,S., Sangkijporn,S., Klungthong,C., Thaisomboonsuk,B., Nisalak,A., Gibbons,R., Iamsirithaworn,S.,…	2021-04-22 21:00:00	02371/03	Dengue virus	Flavivirus	Flaviviridae	ssRNA(+)	10179	GenBank	partial		Thailand	Thailand	Homo sapiens		2003-01-01	Dengue virus type I isolate 02371/03 polyprotein (POLY) gene, complete cds
MW946067	Katzelnick,L., Escoto,A., Huang,A., Garcia-Carreras,B., Chowdhury,N., Berry,I., Chavez,C., Rutvisuttinunt,W., Buchy,P., Duong,V., Dussart,P., Gromowski,G., Macareo,L., Smith,D., Jarman,R., Whitehead,S., Salje,H., Cummings,D., Lessler,J., Melendrez,M., Endy,T., Kalanarooj,S., A-Nuegoonpipat,A., Chanama,S., Sangkijporn,S., Klungthong,C., Thaisomboonsuk,B., Nisalak,A., Gibbons,R., Iamsirithaworn,S.,…	2021-04-22 21:00:00	01203/03	Dengue virus	Flavivirus	Flaviviridae	ssRNA(+)	10179	GenBank	partial		Thailand	Thailand	Homo sapiens		2003-01-01	Dengue virus type I isolate 01203/03 polyprotein (POLY) gene, complete cds
MW946066	Katzelnick,L., Escoto,A., Huang,A., Garcia-Carreras,B., Chowdhury,N., Berry,I., Chavez,C., Rutvisuttinunt,W., Buchy,P., Duong,V., Dussart,P., Gromowski,G., Macareo,L., Smith,D., Jarman,R., Whitehead,S., Salje,H., Cummings,D., Lessler,J., Melendrez,M., Endy,T., Kalanarooj,S., A-Nuegoonpipat,A., Chanama,S., Sangkijporn,S., Klungthong,C., Thaisomboonsuk,B., Nisalak,A., Gibbons,R., Iamsirithaworn,S.,…	2021-04-22 21:00:00	01331/05	Dengue virus	Flavivirus	Flaviviridae	ssRNA(+)	10179	GenBank	partial		Thailand	Thailand	Homo sapiens		2005-01-01	Dengue virus type I isolate 01331/05 polyprotein (POLY) gene, complete cds
[truncated: 3,080 more rows]
