# Supplementary material for: Circulation of Dengue Virus Serotype 1 genotype V and Dengue Virus Serotype 2 genotype III in Tocantins State, Northern Brazil, 2021-2022
Source: Preprints.org preprint supplement (doi:10.20944/preprints202309.1376.v1), 2023-09-20
Supplement: Supplementary file 4 [file Table S2.xlsx]

## Sheet: Table S2
Table S2. DENV-2 Genomes of All Known Six Genotypes (I-VI) Obtained from GenBank
Accession	Submitters	Release_Date	Isolate	Species	Genus	Family	Molecule_type	Length	Sequence_Type	Nuc_Completeness	Genotype	Geo_Location	Country	Host	Isolation_Source	Collection_Date	GenBank_Title
NC_001474.2	Kinney,R.M., Butrapet,S., Chang,G.J., Tsuchiya,K.R., Roehrig,J.T., Bhamarapravati,N., Gubler,D.J.	1993-08-02T00:00:00Z	0	Dengue virus	Flavivirus	Flaviviridae	ssRNA(+)	10723	RefSeq	complete	0	Thailand	Thailand	0	0	1964	Dengue virus 2, complete genome
OP410992.1	Hapuarachchi,H.C., Setoh,Y.X., Wong,J.C.C., Ng,L.C.	2022-09-15T00:00:00Z	SG(EHI)D2/43089Y16	Dengue virus	Flavivirus	Flaviviridae	ssRNA(+)	10723	GenBank	complete	Cosmopolitan	Singapore	Singapore	Homo sapiens	blood	2016-10	Dengue virus type 2 isolate SG(EHI)D2/43089Y16, complete genome
OP410991.1	Hapuarachchi,H.C., Setoh,Y.X., Wong,J.C.C., Ng,L.C.	2022-09-15T00:00:00Z	SG(EHI)D2/44766Y17	Dengue virus	Flavivirus	Flaviviridae	ssRNA(+)	10718	GenBank	complete	Cosmopolitan (Indian lineage)	Singapore	Singapore	Homo sapiens	blood	2017-10	Dengue virus type 2 isolate SG(EHI)D2/44766Y17, complete genome
OP410990.1	Hapuarachchi,H.C., Setoh,Y.X., Wong,J.C.C., Ng,L.C.	2022-09-15T00:00:00Z	SG(EHI)D2/41002Y19	Dengue virus	Flavivirus	Flaviviridae	ssRNA(+)	10723	GenBank	complete	Cosmopolitan	Singapore	Singapore	Homo sapiens	blood	2019-10	Dengue virus type 2 isolate SG(EHI)D2/41002Y19, complete genome
OP410989.1	Hapuarachchi,H.C., Setoh,Y.X., Wong,J.C.C., Ng,L.C.	2022-09-15T00:00:00Z	SG(EHI)D2/0866Y07	Dengue virus	Flavivirus	Flaviviridae	ssRNA(+)	10723	GenBank	complete	Cosmopolitan	Singapore	Singapore	Homo sapiens	blood	2007-07	Dengue virus type 2 isolate SG(EHI)D2/0866Y07, complete genome
OP389112.1	Su,W., Cao,Y., Lu,W.	2022-09-13T00:00:00Z	2022GZ01726_LKA	Dengue virus	Flavivirus	Flaviviridae	ssRNA(+)	10586	GenBank	partial	0	China	China	Homo sapiens	blood	2022-07-25	Dengue virus type 2 isolate 2022GZ01726_LKA polyprotein (POLY) gene, complete cds
OP310808.1	Agrawal,T., Saraswat,S., Shashi,P., Ananthraj,A., Kumar,S., Chandele,A., Lodha,R., Singh,B., Medigeshi,G.R.	2022-08-31T00:00:00Z	S144	Dengue virus	Flavivirus	Flaviviridae	ssRNA(+)	10598	GenBank	partial	0	India	India	Homo sapiens	blood	2019-09-27	Dengue virus type 2 isolate S144 polyprotein (POLY) gene, complete cds
OP310807.1	Agrawal,T., Saraswat,S., Shashi,P., Ananthraj,A., Kumar,S., Chandele,A., Lodha,R., Singh,B., Medigeshi,G.R.	2022-08-31T00:00:00Z	S121	Dengue virus	Flavivirus	Flaviviridae	ssRNA(+)	10556	GenBank	partial	0	India	India	Homo sapiens	blood	2019-09-26	Dengue virus type 2 isolate S121 polyprotein (POLY) gene, complete cds
OP310806.1	Agrawal,T., Saraswat,S., Shashi,P., Ananthraj,A., Kumar,S., Chandele,A., Lodha,R., Singh,B., Medigeshi,G.R.	2022-08-31T00:00:00Z	S3	Dengue virus	Flavivirus	Flaviviridae	ssRNA(+)	10713	GenBank	partial	0	India	India	Homo sapiens	blood	2018-10-30	Dengue virus type 2 isolate S3 polyprotein (POLY) gene, complete cds
OP310805.1	Agrawal,T., Saraswat,S., Shashi,P., Ananthraj,A., Kumar,S., Chandele,A., Lodha,R., Singh,B., Medigeshi,G.R.	2022-08-31T00:00:00Z	D3022	Dengue virus	Flavivirus	Flaviviridae	ssRNA(+)	10708	GenBank	partial	0	India	India	Homo sapiens	blood	2020-10-14	Dengue virus type 2 isolate D3022 polyprotein (POLY) gene, complete cds
ON908244.1	Su,W., Jiang,L., Lu,W., Cao,Y.	2022-07-07T00:00:00Z	D2_19XN15729	Dengue virus	Flavivirus	Flaviviridae	ssRNA(+)	10672	GenBank	partial	0	China	China	Homo sapiens	blood	2019-06-20	Dengue virus 2 isolate D2_19XN15729 polyprotein (POLY) gene, complete cds
ON908230.1	Su,W., Jiang,L., Lu,W., Cao,Y.	2022-07-07T00:00:00Z	19XN50506	Dengue virus	Flavivirus	Flaviviridae	ssRNA(+)	10586	GenBank	partial	0	Cambodia	Cambodia	Homo sapiens	blood	2019-05-31	Dengue virus 2 isolate 19XN50506 polyprotein (POLY) gene, complete cds
ON908229.1	Su,W., Jiang,L., Lu,W., Cao,Y.	2022-07-07T00:00:00Z	19XN23153	Dengue virus	Flavivirus	Flaviviridae	ssRNA(+)	10563	GenBank	partial	0	China	China	Homo sapiens	blood	2019-09-16	Dengue virus 2 isolate 19XN23153 polyprotein (POLY) gene, complete cds
ON908228.1	Su,W., Jiang,L., Lu,W., Cao,Y.	2022-07-07T00:00:00Z	17XN21603	Dengue virus	Flavivirus	Flaviviridae	ssRNA(+)	10588	GenBank	partial	0	China	China	Homo sapiens	blood	2017-08-07	Dengue virus 2 isolate 17XN21603 polyprotein (POLY) gene, complete cds
ON908227.1	Su,W., Jiang,L., Lu,W., Cao,Y.	2022-07-07T00:00:00Z	19XN50755	Dengue virus	Flavivirus	Flaviviridae	ssRNA(+)	10671	GenBank	partial	0	China	China	Homo sapiens	blood	2019-08-16	Dengue virus 2 isolate 19XN50755 polyprotein (POLY) gene, complete cds
ON908226.1	Su,W., Jiang,L., Lu,W., Cao,Y.	2022-07-07T00:00:00Z	18XN20677	Dengue virus	Flavivirus	Flaviviridae	ssRNA(+)	10588	GenBank	partial	0	China	China	Homo sapiens	blood	2018-08-28	Dengue virus 2 isolate 18XN20677 polyprotein (POLY) gene, complete cds
ON908225.1	Su,W., Jiang,L., Lu,W., Cao,Y.	2022-07-07T00:00:00Z	19XN19634	Dengue virus	Flavivirus	Flaviviridae	ssRNA(+)	10561	GenBank	partial	0	China	China	Homo sapiens	blood	2019-08-04	Dengue virus 2 isolate 19XN19634 polyprotein (POLY) gene, complete cds
ON908224.1	Su,W., Jiang,L., Lu,W., Cao,Y.	2022-07-07T00:00:00Z	19XN17542	Dengue virus	Flavivirus	Flaviviridae	ssRNA(+)	10528	GenBank	partial	0	Cambodia	Cambodia	Homo sapiens	blood	2019-07-08	Dengue virus 2 isolate 19XN17542 polyprotein (POLY) gene, complete cds
ON908223.1	Su,W., Jiang,L., Lu,W., Cao,Y.	2022-07-07T00:00:00Z	19XN14641	Dengue virus	Flavivirus	Flaviviridae	ssRNA(+)	10542	GenBank	partial	0	Niger	Niger	Homo sapiens	blood	2019-06-15	Dengue virus 2 isolate 19XN14641 polyprotein (POLY) gene, complete cds
ON908222.1	Su,W., Jiang,L., Lu,W., Cao,Y.	2022-07-07T00:00:00Z	18XN13236	Dengue virus	Flavivirus	Flaviviridae	ssRNA(+)	10635	GenBank	partial	0	China	China	Homo sapiens	blood	2018-05-17	Dengue virus 2 isolate 18XN13236 polyprotein (POLY) gene, complete cds
ON908221.1	Su,W., Jiang,L., Lu,W., Cao,Y.	2022-07-07T00:00:00Z	19XN16107	Dengue virus	Flavivirus	Flaviviridae	ssRNA(+)	10478	GenBank	partial	0	Philippines	Philippines	Homo sapiens	blood	2019-07-02	Dengue virus 2 isolate 19XN16107 polyprotein (POLY) gene, complete cds
ON907581.1	Su,W., Cao,Y., Lu,W.	2022-07-07T00:00:00Z	19XN16107_D2_PHL	Dengue virus	Flavivirus	Flaviviridae	ssRNA(+)	10582	GenBank	partial	0	Philippines	Philippines	Homo sapiens	blood	2019-07-02	Dengue virus 2 isolate 19XN16107_D2_PHL polyprotein (POLY) gene, complete cds
ON907580.1	Su,W., Cao,Y., Lu,W.	2022-07-07T00:00:00Z	19XN14641_D2_NER	Dengue virus	Flavivirus	Flaviviridae	ssRNA(+)	10570	GenBank	partial	0	Niger	Niger	Homo sapiens	blood	2019-06-15	Dengue virus 2 isolate 19XN14641_D2_NER polyprotein (POLY) gene, complete cds
ON907579.1	Su,W., Cao,Y., Lu,W.	2022-07-07T00:00:00Z	17XN21603_D2_CHN	Dengue virus	Flavivirus	Flaviviridae	ssRNA(+)	10558	GenBank	partial	0	China	China	Homo sapiens	blood	2017-08-07	Dengue virus 2 isolate 17XN21603_D2_CHN polyprotein (POLY) gene, complete cds
ON890479.1	Su,W., Cao,Y., Lu,W.	2022-07-05T00:00:00Z	19XN50506_D2_KHM	Dengue virus	Flavivirus	Flaviviridae	ssRNA(+)	10573	GenBank	partial	0	Cambodia	Cambodia	Homo sapiens	blood	2019-05-31	Dengue virus 2 isolate 19XN50506_D2_KHM polyprotein (POLY) gene, complete cds
ON890422.1	Su,W., Cao,Y., Lu,W.	2022-07-05T00:00:00Z	19XN23153_D2_CHN	Dengue virus	Flavivirus	Flaviviridae	ssRNA(+)	10565	GenBank	partial	0	China: Guangzhou	China	Homo sapiens	blood	2019-09-16	Dengue virus 2 isolate 19XN23153_D2_CHN polyprotein (POLY) gene, complete cds
ON890351.1	Su,W., Cao,Y., Lu,W.	2022-07-05T00:00:00Z	17XN21603_D2_CHN	Dengue virus	Flavivirus	Flaviviridae	ssRNA(+)	10558	GenBank	partial	0	China: Guangzhou	China	Homo sapiens	blood	2017-08-07	Dengue virus 2 isolate 17XN21603_D2_CHN polyprotein (POLY) gene, complete cds
ON888666.1	Su,W., Cao,Y., Lu,W.	2022-07-05T00:00:00Z	19XN50755_D2_CHN	Dengue virus	Flavivirus	Flaviviridae	ssRNA(+)	10604	GenBank	partial	0	China: Guangzhou	China	Homo sapiens	blood	2019-08-16	Dengue virus 2 isolate 19XN50755_D2_CHN polyprotein (POLY) gene, complete cds
ON887640.1	Su,W., Cao,Y., Lu,W.	2022-07-05T00:00:00Z	18XN20677_D2_CHN	Dengue virus	Flavivirus	Flaviviridae	ssRNA(+)	10558	GenBank	partial	0	China: Guangzhou	China	Homo sapiens	blood	2018-08-28	Dengue virus 2 isolate 18XN20677_D2_CHN polyprotein (POLY) gene, complete cds
ON887284.1	Su,W., Cao,Y., Lu,W.	2022-07-05T00:00:00Z	19XN17542_D2_KHM	Dengue virus	Flavivirus	Flaviviridae	ssRNA(+)	10572	GenBank	partial	0	Cambodia	Cambodia	Homo sapiens	blood	2019-07-08	Dengue virus 2 isolate 19XN17542_D2_KHM polyprotein (POLY) gene, complete cds
ON885286.1	Su,W., Cao,Y., Lu,W.	2022-07-05T00:00:00Z	19XN14641_D2_NER	Dengue virus	Flavivirus	Flaviviridae	ssRNA(+)	10570	GenBank	partial	0	Niger	Niger	Homo sapiens	blood	2019-06-15	Dengue virus 2 isolate 19XN14641_D2_NER polyprotein (POLY) gene, complete cds
ON885253.1	Su,W., Cao,Y., Lu,W.	2022-07-05T00:00:00Z	19XN16107_D2_PHL	Dengue virus	Flavivirus	Flaviviridae	ssRNA(+)	10582	GenBank	partial	0	Philippines	Philippines	Homo sapiens	blood	2019-07-02	Dengue virus 2 isolate 19XN16107_D2_PHL polyprotein (POLY) gene, complete cds
ON875316.1	Su,W., Cao,Y., Lu,W.	2022-07-04T00:00:00Z	18XN13236_D2_FJI	Dengue virus	Flavivirus	Flaviviridae	ssRNA(+)	10564	GenBank	partial	0	China: Guangzhou	China	Homo sapiens	blood	2018-05-17	Dengue virus 2 isolate 18XN13236_D2_FJI polyprotein (POLY) gene, complete cds
ON853797.1	Su,W., Cao,Y., Lu,W.	2022-07-02T00:00:00Z	18XN18318_D2_KHM	Dengue virus	Flavivirus	Flaviviridae	ssRNA(+)	10686	GenBank	partial	0	Cambodia	Cambodia	Homo sapiens	blood	2018-07-13	Dengue virus 2 isolate 18XN18318_D2_KHM polyprotein (POLY) gene, complete cds
ON799267.1	Maurya,R., Agrawal,T., Saraswat,S., Ananthraj,A., Chandele,A., Kumar,S., Kanakan,A., Chattopadhyay,P., Swaminathan,A., Saifi,S., Shashi,P., Pandey,R., Medigeshi,G.R.	2022-06-26T00:00:00Z	S9	Dengue virus	Flavivirus	Flaviviridae	ssRNA(+)	10511	GenBank	partial	0	India	India	Homo sapiens	blood	2018-10-30	Dengue virus 2 isolate S9 polyprotein (POLY) gene, complete cds
ON714337.1	Cruz,C.D., Alba,M., Mores,C., Torre,A.J., Pollet,S., Leguia,M., Comach,G.A., Camacho,D.E., Ampuero,J.S., Leguia,M.L., Graf,P.C.	2022-06-13T00:00:00Z	FVM00186/VEN/2015	Dengue virus	Flavivirus	Flaviviridae	ssRNA(+)	10687	GenBank	partial	Genotype III - Southern Asian-American	Venezuela: Aragua	Venezuela	Homo sapiens	blood	2015-01-29	Dengue virus 2 isolate FVM00186/VEN/2015 polyprotein (POLY) gene, complete cds
ON634756.1	Sacchi,C.T., Campos,K.R., Santos,M.B., Reis,A.D., Amarante,A.F.	2022-08-23T00:00:00Z	NS10939	Dengue virus	Flavivirus	Flaviviridae	ssRNA(+)	10421	GenBank	partial	II - Cosmopolitan	Brazil: Sao Paulo, Piracicaba	Brazil	Homo sapiens	blood	2022-01-30	Dengue virus 2 isolate NS10939 polyprotein (POLY) gene, complete cds
ON634755.1	Sacchi,C.T., Campos,K.R., Santos,M.B., Reis,A.D., Amarante,A.F.	2022-08-23T00:00:00Z	NS11458	Dengue virus	Flavivirus	Flaviviridae	ssRNA(+)	10418	GenBank	partial	II - Cosmopolitan	Brazil: Sao Paulo, Piracicaba	Brazil	Homo sapiens	blood	2022-03-06	Dengue virus 2 isolate NS11458 polyprotein (POLY) gene, complete cds
ON634754.1	Sacchi,C.T., Campos,K.R., Santos,M.B., Reis,A.D., Amarante,A.F.	2022-08-23T00:00:00Z	NS11423	Dengue virus	Flavivirus	Flaviviridae	ssRNA(+)	10432	GenBank	partial	III - Southern Asian-American	Brazil: Sao Paulo, Taubate	Brazil	Homo sapiens	blood	2022-03-26	Dengue virus 2 isolate NS11423 polyprotein (POLY) gene, complete cds
ON634753.1	Sacchi,C.T., Campos,K.R., Santos,M.B., Reis,A.D., Amarante,A.F.	2022-08-23T00:00:00Z	NS11379	Dengue virus	Flavivirus	Flaviviridae	ssRNA(+)	10421	GenBank	partial	III - Southern Asian-American	Brazil: Sao Paulo, Sao Jose dos Campos	Brazil	Homo sapiens	blood	2022-03-21	Dengue virus 2 isolate NS11379 polyprotein (POLY) gene, complete cds
ON634752.1	Sacchi,C.T., Campos,K.R., Santos,M.B., Reis,A.D., Amarante,A.F.	2022-08-23T00:00:00Z	NS11331	Dengue virus	Flavivirus	Flaviviridae	ssRNA(+)	10418	GenBank	partial	III - Southern Asian-American	Brazil: Sao Paulo, Tremembe	Brazil	Homo sapiens	blood	2022-03-17	Dengue virus 2 isolate NS11331 polyprotein (POLY) gene, complete cds
ON634751.1	Sacchi,C.T., Campos,K.R., Santos,M.B., Reis,A.D., Amarante,A.F.	2022-08-23T00:00:00Z	49297	Dengue virus	Flavivirus	Flaviviridae	ssRNA(+)	10423	GenBank	partial	III - Southern Asian-American	Brazil: Sao Paulo, Monte Castela	Brazil	Homo sapiens	blood	2022-04-14	Dengue virus 2 isolate 49297 polyprotein (POLY) gene, complete cds
ON634750.1	Sacchi,C.T., Campos,K.R., Santos,M.B., Reis,A.D., Amarante,A.F.	2022-08-23T00:00:00Z	RP15	Dengue virus	Flavivirus	Flaviviridae	ssRNA(+)	10424	GenBank	partial	II - Cosmopolitan	Brazil: Sao Paulo, Santa Rosa do Viterbo	Brazil	Homo sapiens	blood	2022-03-24	Dengue virus 2 isolate RP15 polyprotein (POLY) gene, complete cds
ON634749.1	Sacchi,C.T., Campos,K.R., Santos,M.B., Reis,A.D., Amarante,A.F.	2022-08-23T00:00:00Z	NS11622	Dengue virus	Flavivirus	Flaviviridae	ssRNA(+)	10380	GenBank	partial	III - Southern Asian-American	Brazil: Sao Paulo, Sao Sebastiao	Brazil	Homo sapiens	blood	2022-04-05	Dengue virus 2 isolate NS11622 polyprotein (POLY) gene, complete cds
ON634748.1	Sacchi,C.T., Campos,K.R., Santos,M.B., Reis,A.D., Amarante,A.F.	2022-08-23T00:00:00Z	NS11605	Dengue virus	Flavivirus	Flaviviridae	ssRNA(+)	10498	GenBank	partial	III - Southern Asian-American	Brazil: Sao Paulo, Dracena	Brazil	Homo sapiens	blood	2022-04-13	Dengue virus 2 isolate NS11605 polyprotein (POLY) gene, complete cds
ON634747.1	Sacchi,C.T., Campos,K.R., Santos,M.B., Reis,A.D., Amarante,A.F.	2022-08-23T00:00:00Z	NS11573	Dengue virus	Flavivirus	Flaviviridae	ssRNA(+)	10380	GenBank	partial	III - Southern Asian-American	Brazil: Sao Paulo, Tremembe	Brazil	Homo sapiens	blood	2022-04-11	Dengue virus 2 isolate NS11573 polyprotein (POLY) gene, complete cds
ON634746.1	Sacchi,C.T., Campos,K.R., Santos,M.B., Reis,A.D., Amarante,A.F.	2022-08-23T00:00:00Z	NS11487	Dengue virus	Flavivirus	Flaviviridae	ssRNA(+)	10425	GenBank	partial	III - Southern Asian-American	Brazil: Sao Paulo, Dracena	Brazil	Homo sapiens	blood	2022-03-25	Dengue virus 2 isolate NS11487 polyprotein (POLY) gene, complete cds
ON634745.1	Sacchi,C.T., Campos,K.R., Santos,M.B., Reis,A.D., Amarante,A.F.	2022-08-23T00:00:00Z	NS11354	Dengue virus	Flavivirus	Flaviviridae	ssRNA(+)	10588	GenBank	partial	II - Cosmopolitan	Brazil: Sao Paulo, Piracicaba	Brazil	Homo sapiens	blood	2022-03-14	Dengue virus 2 isolate NS11354 polyprotein (POLY) gene, complete cds
ON634744.1	Sacchi,C.T., Campos,K.R., Santos,M.B., Reis,A.D., Amarante,A.F.	2022-08-23T00:00:00Z	NS11353	Dengue virus	Flavivirus	Flaviviridae	ssRNA(+)	10422	GenBank	partial	III - Southern Asian-American	Brazil: Sao Paulo, Piracicaba	Brazil	Homo sapiens	blood	2022-03-11	Dengue virus 2 isolate NS11353 polyprotein (POLY) gene, complete cds
ON634743.1	Sacchi,C.T., Campos,K.R., Santos,M.B., Reis,A.D., Amarante,A.F.	2022-08-23T00:00:00Z	NS11299	Dengue virus	Flavivirus	Flaviviridae	ssRNA(+)	10428	GenBank	partial	II - Cosmopolitan	Brazil: Sao Paulo, Sao Jose dos Campos	Brazil	Homo sapiens	blood	2022-03-15	Dengue virus 2 isolate NS11299 polyprotein (POLY) gene, complete cds
ON634742.1	Sacchi,C.T., Campos,K.R., Santos,M.B., Reis,A.D., Amarante,A.F.	2022-08-23T00:00:00Z	NS11015	Dengue virus	Flavivirus	Flaviviridae	ssRNA(+)	10425	GenBank	partial	II - Cosmopolitan	Brazil: Sao Paulo, Piracicaba	Brazil	Homo sapiens	blood	2022-02-05	Dengue virus 2 isolate NS11015 polyprotein (POLY) gene, complete cds
ON634741.1	Sacchi,C.T., Campos,K.R., Santos,M.B., Reis,A.D., Amarante,A.F.	2022-08-23T00:00:00Z	49340	Dengue virus	Flavivirus	Flaviviridae	ssRNA(+)	10422	GenBank	partial	III - Southern Asian-American	Brazil: Sao Paulo, Carapicuiba	Brazil	Homo sapiens	blood	2022-04-25	Dengue virus 2 isolate 49340 polyprotein (POLY) gene, complete cds
ON634740.1	Sacchi,C.T., Campos,K.R., Santos,M.B., Reis,A.D., Amarante,A.F.	2022-08-23T00:00:00Z	NS11543	Dengue virus	Flavivirus	Flaviviridae	ssRNA(+)	10420	GenBank	partial	III - Southern Asian-American	Brazil: Sao Paulo, Diadema	Brazil	Homo sapiens	blood	2022-03-28	Dengue virus 2 isolate NS11543 polyprotein (POLY) gene, complete cds
ON634739.1	Sacchi,C.T., Campos,K.R., Santos,M.B., Reis,A.D., Amarante,A.F.	2022-08-23T00:00:00Z	RNA46678	Dengue virus	Flavivirus	Flaviviridae	ssRNA(+)	10386	GenBank	partial	III - Southern Asian-American	Brazil: Sao Paulo, Praia Grande	Brazil	Homo sapiens	blood	2021-05-07	Dengue virus 2 isolate RNA46678 polyprotein (POLY) gene, complete cds
ON634738.1	Sacchi,C.T., Campos,K.R., Santos,M.B., Reis,A.D., Amarante,A.F.	2022-08-23T00:00:00Z	RNA44295	Dengue virus	Flavivirus	Flaviviridae	ssRNA(+)	10386	GenBank	partial	III - Southern Asian-American	Brazil: Sao Paulo, Sao Pedro do Turvo	Brazil	Homo sapiens	blood	2020-04-03	Dengue virus 2 isolate RNA44295 polyprotein (POLY) gene, complete cds
ON634737.1	Sacchi,C.T., Campos,K.R., Santos,M.B., Reis,A.D., Amarante,A.F.	2022-08-23T00:00:00Z	NS9817	Dengue virus	Flavivirus	Flaviviridae	ssRNA(+)	10384	GenBank	partial	III - Southern Asian-American	Brazil: Sao Paulo, Mirandopolis	Brazil	Homo sapiens	blood	2021-05-04	Dengue virus 2 isolate NS9817 polyprotein (POLY) gene, complete cds
ON634736.1	Sacchi,C.T., Campos,K.R., Santos,M.B., Reis,A.D., Amarante,A.F.	2022-08-23T00:00:00Z	NS9815	Dengue virus	Flavivirus	Flaviviridae	ssRNA(+)	10386	GenBank	partial	III - Southern Asian-American	Brazil: Sao Paulo, Rubiacea	Brazil	Homo sapiens	blood	2021-04-30	Dengue virus 2 isolate NS9815 polyprotein (POLY) gene, complete cds
ON634735.1	Sacchi,C.T., Campos,K.R., Santos,M.B., Reis,A.D., Amarante,A.F.	2022-08-23T00:00:00Z	NS9759	Dengue virus	Flavivirus	Flaviviridae	ssRNA(+)	10386	GenBank	partial	III - Southern Asian-American	Brazil: Sao Paulo, Piracicaba	Brazil	Homo sapiens	blood	2021-04-25	Dengue virus 2 isolate NS9759 polyprotein (POLY) gene, complete cds
ON634734.1	Sacchi,C.T., Campos,K.R., Santos,M.B., Reis,A.D., Amarante,A.F.	2022-08-23T00:00:00Z	NS9745	Dengue virus	Flavivirus	Flaviviridae	ssRNA(+)	10386	GenBank	partial	III - Southern Asian-American	Brazil: Sao Paulo, Itu	Brazil	Homo sapiens	blood	2021-05-06	Dengue virus 2 isolate NS9745 polyprotein (POLY) gene, complete cds
ON634733.1	Sacchi,C.T., Campos,K.R., Santos,M.B., Reis,A.D., Amarante,A.F.	2022-08-23T00:00:00Z	NS9510	Dengue virus	Flavivirus	Flaviviridae	ssRNA(+)	10386	GenBank	partial	III - Southern Asian-American	Brazil: Sao Paulo, Itabera	Brazil	Homo sapiens	blood	2021-04-19	Dengue virus 2 isolate NS9510 polyprotein (POLY) gene, complete cds
ON634732.1	Sacchi,C.T., Campos,K.R., Santos,M.B., Reis,A.D., Amarante,A.F.	2022-08-23T00:00:00Z	NS9471	Dengue virus	Flavivirus	Flaviviridae	ssRNA(+)	10386	GenBank	partial	III - Southern Asian-American	Brazil: Sao Paulo, Tupa	Brazil	Homo sapiens	blood	2021-04-13	Dengue virus 2 isolate NS9471 polyprotein (POLY) gene, complete cds
ON634731.1	Sacchi,C.T., Campos,K.R., Santos,M.B., Reis,A.D., Amarante,A.F.	2022-08-23T00:00:00Z	NS9469	Dengue virus	Flavivirus	Flaviviridae	ssRNA(+)	10386	GenBank	partial	III - Southern Asian-American	Brazil: Sao Paulo, Arci-Iris	Brazil	Homo sapiens	blood	2021-03-25	Dengue virus 2 isolate NS9469 polyprotein (POLY) gene, complete cds
ON634730.1	Sacchi,C.T., Campos,K.R., Santos,M.B., Reis,A.D., Amarante,A.F.	2022-08-23T00:00:00Z	NS9459	Dengue virus	Flavivirus	Flaviviridae	ssRNA(+)	10386	GenBank	partial	III - Southern Asian-American	Brazil: Sao Paulo, Bertioga	Brazil	Homo sapiens	blood	2021-04-07	Dengue virus 2 isolate NS9459 polyprotein (POLY) gene, complete cds
ON634729.1	Sacchi,C.T., Campos,K.R., Santos,M.B., Reis,A.D., Amarante,A.F.	2022-08-23T00:00:00Z	NS9434	Dengue virus	Flavivirus	Flaviviridae	ssRNA(+)	10384	GenBank	partial	III - Southern Asian-American	Brazil: Sao Paulo, Piracicaba	Brazil	Homo sapiens	blood	2021-04-09	Dengue virus 2 isolate NS9434 polyprotein (POLY) gene, complete cds
ON634728.1	Sacchi,C.T., Campos,K.R., Santos,M.B., Reis,A.D., Amarante,A.F.	2022-08-23T00:00:00Z	NS9428	Dengue virus	Flavivirus	Flaviviridae	ssRNA(+)	10386	GenBank	partial	III - Southern Asian-American	Brazil: Sao Paulo, Pirajui	Brazil	Homo sapiens	blood	2021-04-06	Dengue virus 2 isolate NS9428 polyprotein (POLY) gene, complete cds
ON634727.1	Sacchi,C.T., Campos,K.R., Santos,M.B., Reis,A.D., Amarante,A.F.	2022-08-23T00:00:00Z	NS9406	Dengue virus	Flavivirus	Flaviviridae	ssRNA(+)	10386	GenBank	partial	III - Southern Asian-American	Brazil: Sao Paulo, Ilhabela	Brazil	Homo sapiens	blood	2021-04-02	Dengue virus 2 isolate NS9406 polyprotein (POLY) gene, complete cds
ON634726.1	Sacchi,C.T., Campos,K.R., Santos,M.B., Reis,A.D., Amarante,A.F.	2022-08-23T00:00:00Z	NS9244	Dengue virus	Flavivirus	Flaviviridae	ssRNA(+)	10384	GenBank	partial	III - Southern Asian-American	Brazil: Sao Paulo, Tiete	Brazil	Homo sapiens	blood	2021-03-25	Dengue virus 2 isolate NS9244 polyprotein (POLY) gene, complete cds
ON634725.1	Sacchi,C.T., Campos,K.R., Santos,M.B., Reis,A.D., Amarante,A.F.	2022-08-23T00:00:00Z	NS9186	Dengue virus	Flavivirus	Flaviviridae	ssRNA(+)	10384	GenBank	partial	III - Southern Asian-American	Brazil: Sao Paulo, Andradina	Brazil	Homo sapiens	blood	2021-03-02	Dengue virus 2 isolate NS9186 polyprotein (POLY) gene, complete cds
ON634724.1	Sacchi,C.T., Campos,K.R., Santos,M.B., Reis,A.D., Amarante,A.F.	2022-08-23T00:00:00Z	NS9076	Dengue virus	Flavivirus	Flaviviridae	ssRNA(+)	10386	GenBank	partial	III - Southern Asian-American	Brazil: Sao Paulo, Ubatuba	Brazil	Homo sapiens	blood	2021-03-18	Dengue virus 2 isolate NS9076 polyprotein (POLY) gene, complete cds
ON634723.1	Sacchi,C.T., Campos,K.R., Santos,M.B., Reis,A.D., Amarante,A.F.	2022-08-23T00:00:00Z	NS9053	Dengue virus	Flavivirus	Flaviviridae	ssRNA(+)	10386	GenBank	partial	III - Southern Asian-American	Brazil: Sao Paulo, Ubatuba	Brazil	Homo sapiens	blood	2021-03-18	Dengue virus 2 isolate NS9053 polyprotein (POLY) gene, complete cds
ON634722.1	Sacchi,C.T., Campos,K.R., Santos,M.B., Reis,A.D., Amarante,A.F.	2022-08-23T00:00:00Z	NS8859	Dengue virus	Flavivirus	Flaviviridae	ssRNA(+)	10386	GenBank	partial	III - Southern Asian-American	Brazil: Sao Paulo, Castilho	Brazil	Homo sapiens	blood	2021-02-20	Dengue virus 2 isolate NS8859 polyprotein (POLY) gene, complete cds
ON634721.1	Sacchi,C.T., Campos,K.R., Santos,M.B., Reis,A.D., Amarante,A.F.	2022-08-23T00:00:00Z	NS8809	Dengue virus	Flavivirus	Flaviviridae	ssRNA(+)	10384	GenBank	partial	III - Southern Asian-American	Brazil: Sao Paulo, Sao Vicente	Brazil	Homo sapiens	blood	2021-02-10	Dengue virus 2 isolate NS8809 polyprotein (POLY) gene, complete cds
ON634720.1	Sacchi,C.T., Campos,K.R., Santos,M.B., Reis,A.D., Amarante,A.F.	2022-08-23T00:00:00Z	NS8806	Dengue virus	Flavivirus	Flaviviridae	ssRNA(+)	10386	GenBank	partial	III - Southern Asian-American	Brazil: Sao Paulo, Cubatao	Brazil	Homo sapiens	blood	2021-02-22	Dengue virus 2 isolate NS8806 polyprotein (POLY) gene, complete cds
ON634719.1	Sacchi,C.T., Campos,K.R., Santos,M.B., Reis,A.D., Amarante,A.F.	2022-08-23T00:00:00Z	NS8604	Dengue virus	Flavivirus	Flaviviridae	ssRNA(+)	10386	GenBank	partial	III - Southern Asian-American	Brazil: Sao Paulo, Barueri	Brazil	Homo sapiens	blood	2021-02-04	Dengue virus 2 isolate NS8604 polyprotein (POLY) gene, complete cds
ON634718.1	Sacchi,C.T., Campos,K.R., Santos,M.B., Reis,A.D., Amarante,A.F.	2022-08-23T00:00:00Z	NS8588	Dengue virus	Flavivirus	Flaviviridae	ssRNA(+)	10386	GenBank	partial	III - Southern Asian-American	Brazil: Sao Paulo, Birigui	Brazil	Homo sapiens	blood	2021-01-21	Dengue virus 2 isolate NS8588 polyprotein (POLY) gene, complete cds
ON634717.1	Sacchi,C.T., Campos,K.R., Santos,M.B., Reis,A.D., Amarante,A.F.	2022-08-23T00:00:00Z	NS8533	Dengue virus	Flavivirus	Flaviviridae	ssRNA(+)	10384	GenBank	partial	III - Southern Asian-American	Brazil: Sao Paulo, Santos	Brazil	Homo sapiens	blood	2021-01-14	Dengue virus 2 isolate NS8533 polyprotein (POLY) gene, complete cds
ON634716.1	Sacchi,C.T., Campos,K.R., Santos,M.B., Reis,A.D., Amarante,A.F.	2022-08-23T00:00:00Z	NS8187	Dengue virus	Flavivirus	Flaviviridae	ssRNA(+)	10386	GenBank	partial	III - Southern Asian-American	Brazil: Sao Paulo, Lorena	Brazil	Homo sapiens	blood	2020-02-04	Dengue virus 2 isolate NS8187 polyprotein (POLY) gene, complete cds
ON634715.1	Sacchi,C.T., Campos,K.R., Santos,M.B., Reis,A.D., Amarante,A.F.	2022-08-23T00:00:00Z	NS8010	Dengue virus	Flavivirus	Flaviviridae	ssRNA(+)	10386	GenBank	partial	III - Southern Asian-American	Brazil: Sao Paulo, Mogi Guacu	Brazil	Homo sapiens	blood	2020-03-16	Dengue virus 2 isolate NS8010 polyprotein (POLY) gene, complete cds
ON634714.1	Sacchi,C.T., Campos,K.R., Santos,M.B., Reis,A.D., Amarante,A.F.	2022-08-23T00:00:00Z	NS8000	Dengue virus	Flavivirus	Flaviviridae	ssRNA(+)	10386	GenBank	partial	III - Southern Asian-American	Brazil: Sao Paulo, Porto Feliz	Brazil	Homo sapiens	blood	2020-03-19	Dengue virus 2 isolate NS8000 polyprotein (POLY) gene, complete cds
ON634713.1	Sacchi,C.T., Campos,K.R., Santos,M.B., Reis,A.D., Amarante,A.F.	2022-08-23T00:00:00Z	NS7465	Dengue virus	Flavivirus	Flaviviridae	ssRNA(+)	10386	GenBank	partial	III - Southern Asian-American	Brazil: Sao Paulo, Sao Paulo	Brazil	Homo sapiens	blood	2020-02-27	Dengue virus 2 isolate NS7465 polyprotein (POLY) gene, complete cds
ON634712.1	Sacchi,C.T., Campos,K.R., Santos,M.B., Reis,A.D., Amarante,A.F.	2022-08-23T00:00:00Z	NS7453	Dengue virus	Flavivirus	Flaviviridae	ssRNA(+)	10386	GenBank	partial	III - Southern Asian-American	Brazil: Sao Paulo, Conchal	Brazil	Homo sapiens	blood	2020-02-14	Dengue virus 2 isolate NS7453 polyprotein (POLY) gene, complete cds
ON634711.1	Sacchi,C.T., Campos,K.R., Santos,M.B., Reis,A.D., Amarante,A.F.	2022-08-23T00:00:00Z	NS7323	Dengue virus	Flavivirus	Flaviviridae	ssRNA(+)	10386	GenBank	partial	III - Southern Asian-American	Brazil: Sao Paulo, Guarija	Brazil	Homo sapiens	blood	2020-02-17	Dengue virus 2 isolate NS7323 polyprotein (POLY) gene, complete cds
ON634710.1	Sacchi,C.T., Campos,K.R., Santos,M.B., Reis,A.D., Amarante,A.F.	2022-08-23T00:00:00Z	NS7253	Dengue virus	Flavivirus	Flaviviridae	ssRNA(+)	10386	GenBank	partial	III - Southern Asian-American	Brazil: Sao Paulo, Mogi Mirim	Brazil	Homo sapiens	blood	2020-02-08	Dengue virus 2 isolate NS7253 polyprotein (POLY) gene, complete cds
ON634709.1	Sacchi,C.T., Campos,K.R., Santos,M.B., Reis,A.D., Amarante,A.F.	2022-08-23T00:00:00Z	NS7227	Dengue virus	Flavivirus	Flaviviridae	ssRNA(+)	10384	GenBank	partial	III - Southern Asian-American	Brazil: Sao Paulo, Bastos	Brazil	Homo sapiens	blood	2020-02-10	Dengue virus 2 isolate NS7227 polyprotein (POLY) gene, complete cds
ON634708.1	Sacchi,C.T., Campos,K.R., Santos,M.B., Reis,A.D., Amarante,A.F.	2022-08-23T00:00:00Z	NS6587	Dengue virus	Flavivirus	Flaviviridae	ssRNA(+)	10384	GenBank	partial	III - Southern Asian-American	Brazil: Sao Paulo, Oswaldo Cruz	Brazil	Homo sapiens	blood	2020-01-28	Dengue virus 2 isolate NS6587 polyprotein (POLY) gene, complete cds
ON634707.1	Sacchi,C.T., Campos,K.R., Santos,M.B., Reis,A.D., Amarante,A.F.	2022-08-23T00:00:00Z	NS6573	Dengue virus	Flavivirus	Flaviviridae	ssRNA(+)	10386	GenBank	partial	III - Southern Asian-American	Brazil: Sao Paulo, Ourinhos	Brazil	Homo sapiens	blood	2020-01-14	Dengue virus 2 isolate NS6573 polyprotein (POLY) gene, complete cds
ON634706.1	Sacchi,C.T., Campos,K.R., Santos,M.B., Reis,A.D., Amarante,A.F.	2022-08-23T00:00:00Z	NS6535	Dengue virus	Flavivirus	Flaviviridae	ssRNA(+)	10386	GenBank	partial	III - Southern Asian-American	Brazil: Sao Paulo, Cunha	Brazil	Homo sapiens	blood	2020-01-21	Dengue virus 2 isolate NS6535 polyprotein (POLY) gene, complete cds
ON634705.1	Sacchi,C.T., Campos,K.R., Santos,M.B., Reis,A.D., Amarante,A.F.	2022-08-23T00:00:00Z	NS6480	Dengue virus	Flavivirus	Flaviviridae	ssRNA(+)	10386	GenBank	partial	III - Southern Asian-American	Brazil: Sao Paulo, Pindamonhangaba	Brazil	Homo sapiens	blood	2020-01-15	Dengue virus 2 isolate NS6480 polyprotein (POLY) gene, complete cds
ON634704.1	Sacchi,C.T., Campos,K.R., Santos,M.B., Reis,A.D., Amarante,A.F.	2022-08-23T00:00:00Z	NS6312	Dengue virus	Flavivirus	Flaviviridae	ssRNA(+)	10384	GenBank	partial	III - Southern Asian-American	Brazil: Sao Paulo, Santa Cruz das Palmeiras	Brazil	Homo sapiens	blood	2020-01-21	Dengue virus 2 isolate NS6312 polyprotein (POLY) gene, complete cds
ON634703.1	Sacchi,C.T., Campos,K.R., Santos,M.B., Reis,A.D., Amarante,A.F.	2022-08-23T00:00:00Z	NS6267	Dengue virus	Flavivirus	Flaviviridae	ssRNA(+)	10386	GenBank	partial	III - Southern Asian-American	Brazil: Sao Paulo, Mogi das Cruzes	Brazil	Homo sapiens	blood	2020-01-18	Dengue virus 2 isolate NS6267 polyprotein (POLY) gene, complete cds
ON634702.1	Sacchi,C.T., Campos,K.R., Santos,M.B., Reis,A.D., Amarante,A.F.	2022-08-23T00:00:00Z	NS6257	Dengue virus	Flavivirus	Flaviviridae	ssRNA(+)	10386	GenBank	partial	III - Southern Asian-American	Brazil: Sao Paulo, Hortolandia	Brazil	Homo sapiens	blood	2020-01-02	Dengue virus 2 isolate NS6257 polyprotein (POLY) gene, complete cds
ON634701.1	Sacchi,C.T., Campos,K.R., Santos,M.B., Reis,A.D., Amarante,A.F.	2022-08-23T00:00:00Z	NS10098	Dengue virus	Flavivirus	Flaviviridae	ssRNA(+)	10384	GenBank	partial	III - Southern Asian-American	Brazil: Sao Paulo, Itanhaem	Brazil	Homo sapiens	blood	2021-05-28	Dengue virus 2 isolate NS10098 polyprotein (POLY) gene, complete cds
ON634700.1	Sacchi,C.T., Campos,K.R., Santos,M.B., Reis,A.D., Amarante,A.F.	2022-08-23T00:00:00Z	NS10083	Dengue virus	Flavivirus	Flaviviridae	ssRNA(+)	10386	GenBank	partial	III - Southern Asian-American	Brazil: Sao Paulo, Sorocaba	Brazil	Homo sapiens	blood	2021-04-06	Dengue virus 2 isolate NS10083 polyprotein (POLY) gene, complete cds
ON510270.1	Espejo,V.I., Troncos,G.M., Cruz,C.D., Gomez-Camargo,D., Cano-Perez,E., Ampuero,J.S., Tinoco,Y.O., Silva,M.E., Graf,P.C.	2022-05-18T00:00:00Z	FCC00999/BOL-COL/2021	Dengue virus	Flavivirus	Flaviviridae	ssRNA(+)	10672	GenBank	partial	III - Southern Asian-American	Colombia	Colombia	Homo sapiens	blood	2021-05-10	Dengue virus 2 isolate FCC00999/BOL-COL/2021 polyprotein (POLY) gene, complete cds
ON510269.1	Espejo,V.I., Troncos,G.M., Cruz,C.D., Gomez-Camargo,D., Cano-Perez,E., Ampuero,J.S., Tinoco,Y.O., Silva,M.E., Graf,P.C.	2022-05-18T00:00:00Z	FCC00974/BOL-COL/2021	Dengue virus	Flavivirus	Flaviviridae	ssRNA(+)	10672	GenBank	partial	III - Southern Asian-American	Colombia	Colombia	Homo sapiens	blood	2021-04-09	Dengue virus 2 isolate FCC00974/BOL-COL/2021 polyprotein (POLY) gene, complete cds
ON510268.1	Espejo,V.I., Troncos,G.M., Cruz,C.D., Gomez-Camargo,D., Cano-Perez,E., Ampuero,J.S., Tinoco,Y.O., Silva,M.E., Graf,P.C.	2022-05-18T00:00:00Z	FCC00973/BOL-COL/2021	Dengue virus	Flavivirus	Flaviviridae	ssRNA(+)	10672	GenBank	partial	III - Southern Asian-American	Colombia	Colombia	Homo sapiens	blood	2021-04-09	Dengue virus 2 isolate FCC00973/BOL-COL/2021 polyprotein (POLY) gene, complete cds
ON398847.1	Marano,J.M., Weger-Lucarelli,J.	2022-05-09T00:00:00Z	PUO-218	Dengue virus	Flavivirus	Flaviviridae	ssRNA(+)	10723	GenBank	complete	2	Thailand	Thailand	Homo sapiens	blood	1905-06-02	Dengue virus 2 isolate PUO-218, complete genome
ON231313.1	Dieng,I., Diallo,A., Ndiaye,M., Mahmadi,M., Diagne,M.M., Sanke,S., Ndione,M.H.D., Gaye,A., Sagne,S.N., Heraud,J.M., Sall,A.A., Fall,G., Loucoubar,C., Faye,O.	2022-07-29T00:00:00Z	310621	Dengue virus	Flavivirus	Flaviviridae	ssRNA(+)	10176	GenBank	partial	2	Senegal	Senegal	Homo sapiens	blood	2018-11-09	Dengue virus 2 isolate 310621 polyprotein (POLY) gene, complete cds
ON231312.1	Dieng,I., Diallo,A., Ndiaye,M., Mahmadi,M., Diagne,M.M., Sanke,S., Ndione,M.H.D., Gaye,A., Sagne,S.N., Heraud,J.M., Sall,A.A., Fall,G., Loucoubar,C., Faye,O.	2022-07-29T00:00:00Z	310550	Dengue virus	Flavivirus	Flaviviridae	ssRNA(+)	10176	GenBank	partial	2	Senegal	Senegal	Homo sapiens	blood	2018-11-08	Dengue virus 2 isolate 310550 polyprotein (POLY) gene, complete cds
ON231311.1	Dieng,I., Diallo,A., Ndiaye,M., Mahmadi,M., Diagne,M.M., Sanke,S., Ndione,M.H.D., Gaye,A., Sagne,S.N., Heraud,J.M., Sall,A.A., Fall,G., Loucoubar,C., Faye,O.	2022-07-29T00:00:00Z	310605	Dengue virus	Flavivirus	Flaviviridae	ssRNA(+)	10176	GenBank	partial	2	Senegal	Senegal	Homo sapiens	blood	2018-11-09	Dengue virus 2 isolate 310605 polyprotein (POLY) gene, complete cds
ON231310.1	Dieng,I., Diallo,A., Ndiaye,M., Mahmadi,M., Diagne,M.M., Sanke,S., Ndione,M.H.D., Gaye,A., Sagne,S.N., Heraud,J.M., Sall,A.A., Fall,G., Loucoubar,C., Faye,O.	2022-07-29T00:00:00Z	310393	Dengue virus	Flavivirus	Flaviviridae	ssRNA(+)	10176	GenBank	partial	2	Senegal	Senegal	Homo sapiens	blood	2018-10-31	Dengue virus 2 isolate 310393 polyprotein (POLY) gene, complete cds
ON231309.1	Dieng,I., Diallo,A., Ndiaye,M., Mahmadi,M., Diagne,M.M., Sanke,S., Ndione,M.H.D., Gaye,A., Sagne,S.N., Heraud,J.M., Sall,A.A., Fall,G., Loucoubar,C., Faye,O.	2022-07-29T00:00:00Z	310411	Dengue virus	Flavivirus	Flaviviridae	ssRNA(+)	10176	GenBank	partial	2	Senegal	Senegal	Homo sapiens	blood	2018-10-28	Dengue virus 2 isolate 310411 polyprotein (POLY) gene, complete cds
ON231308.1	Dieng,I., Diallo,A., Ndiaye,M., Mahmadi,M., Diagne,M.M., Sanke,S., Ndione,M.H.D., Gaye,A., Sagne,S.N., Heraud,J.M., Sall,A.A., Fall,G., Loucoubar,C., Faye,O.	2022-07-29T00:00:00Z	310405	Dengue virus	Flavivirus	Flaviviridae	ssRNA(+)	10176	GenBank	partial	2	Senegal	Senegal	Homo sapiens	blood	2018-10-28	Dengue virus 2 isolate 310405 polyprotein (POLY) gene, complete cds
ON231307.1	Dieng,I., Diallo,A., Ndiaye,M., Mahmadi,M., Diagne,M.M., Sanke,S., Ndione,M.H.D., Gaye,A., Sagne,S.N., Heraud,J.M., Sall,A.A., Fall,G., Loucoubar,C., Faye,O.	2022-07-29T00:00:00Z	310403	Dengue virus	Flavivirus	Flaviviridae	ssRNA(+)	10176	GenBank	partial	2	Senegal	Senegal	Homo sapiens	blood	2018-10-28	Dengue virus 2 isolate 310403 polyprotein (POLY) gene, complete cds
ON231306.1	Dieng,I., Diallo,A., Ndiaye,M., Mahmadi,M., Diagne,M.M., Sanke,S., Ndione,M.H.D., Gaye,A., Sagne,S.N., Heraud,J.M., Sall,A.A., Fall,G., Loucoubar,C., Faye,O.	2022-07-29T00:00:00Z	310402	Dengue virus	Flavivirus	Flaviviridae	ssRNA(+)	10176	GenBank	partial	2	Senegal	Senegal	Homo sapiens	blood	2018-10-28	Dengue virus 2 isolate 310402 polyprotein (POLY) gene, complete cds
ON231304.1	Dieng,I., Diallo,A., Ndiaye,M., Mahmadi,M., Diagne,M.M., Sanke,S., Ndione,M.H.D., Gaye,A., Sagne,S.N., Heraud,J.M., Sall,A.A., Fall,G., Loucoubar,C., Faye,O.	2022-07-29T00:00:00Z	310395	Dengue virus	Flavivirus	Flaviviridae	ssRNA(+)	10176	GenBank	partial	2	Senegal	Senegal	Homo sapiens	blood	2018-10-26	Dengue virus 2 isolate 310395 polyprotein (POLY) gene, complete cds
ON123663.1	Maurya,R., Agrawal,T., Saraswat,S., Ananthraj,A., Chandele,A., Kumar,S., Kanakan,A., Chattopadhyay,P., Swaminathan,A., Saifi,S., Shashi,P., Pandey,R., Medigeshi,G.R.	2022-04-05T00:00:00Z	N292	Dengue virus	Flavivirus	Flaviviridae	ssRNA(+)	10546	GenBank	partial	0	India	India	Homo sapiens	blood	2018-09-17	Dengue virus 2 isolate N292 polyprotein (POLY) gene, complete cds
ON123652.1	Maurya,R., Agrawal,T., Saraswat,S., Ananthraj,A., Chandele,A., Kumar,S., Kanakan,A., Chattopadhyay,P., Swaminathan,A., Saifi,S., Shashi,P., Pandey,R., Medigeshi,G.R.	2022-04-05T00:00:00Z	D25004	Dengue virus	Flavivirus	Flaviviridae	ssRNA(+)	10256	GenBank	partial	0	India	India	Homo sapiens	blood	2020-02-28	Dengue virus 2 isolate D25004 polyprotein (POLY) gene, complete cds
ON123651.1	Maurya,R., Agrawal,T., Saraswat,S., Ananthraj,A., Chandele,A., Kumar,S., Kanakan,A., Chattopadhyay,P., Swaminathan,A., Saifi,S., Shashi,P., Pandey,R., Medigeshi,G.R.	2022-04-05T00:00:00Z	D23024	Dengue virus	Flavivirus	Flaviviridae	ssRNA(+)	10723	GenBank	complete	0	India	India	Homo sapiens	blood	2020-10-22	Dengue virus 2 isolate D23024, complete genome
ON123649.1	Maurya,R., Agrawal,T., Saraswat,S., Ananthraj,A., Chandele,A., Kumar,S., Kanakan,A., Chattopadhyay,P., Swaminathan,A., Saifi,S., Shashi,P., Pandey,R., Medigeshi,G.R.	2022-04-05T00:00:00Z	D22006	Dengue virus	Flavivirus	Flaviviridae	ssRNA(+)	10598	GenBank	partial	0	India	India	Homo sapiens	blood	2020-09-23	Dengue virus 2 isolate D22006 polyprotein (POLY) gene, complete cds
ON123645.1	Espejo,V.I., Troncos,G.M., Cruz,C.D., Olivos,J.M., Ramos,R.E., Chuquirachi,F.J., Ocana,V.R., Holguin,C.E., Ampuero,J.S., Tinoco,Y.O., Graf,P.C.	2022-04-05T00:00:00Z	FPP04238/PIU-PER/2021	Dengue virus	Flavivirus	Flaviviridae	ssRNA(+)	10671	GenBank	partial	III - Southern Asian-American	Peru	Peru	Homo sapiens	blood	2021-06-18	Dengue virus 2 isolate FPP04238/PIU-PER/2021 polyprotein (POLY) gene, complete cds
ON123644.1	Espejo,V.I., Troncos,G.M., Cruz,C.D., Olivos,J.M., Ramos,R.E., Chuquirachi,F.J., Ocana,V.R., Holguin,C.E., Ampuero,J.S., Tinoco,Y.O., Graf,P.C.	2022-04-05T00:00:00Z	FPJ01582/JUN-PER/2021	Dengue virus	Flavivirus	Flaviviridae	ssRNA(+)	10671	GenBank	partial	II - Cosmopolitan	Peru	Peru	Homo sapiens	blood	2021-07-21	Dengue virus 2 isolate FPJ01582/JUN-PER/2021 polyprotein (POLY) gene, complete cds
ON123643.1	Espejo,V.I., Troncos,G.M., Cruz,C.D., Olivos,J.M., Ramos,R.E., Chuquirachi,F.J., Ocana,V.R., Holguin,C.E., Ampuero,J.S., Tinoco,Y.O., Graf,P.C.	2022-04-05T00:00:00Z	FPJ01523/JUN-PER/2021	Dengue virus	Flavivirus	Flaviviridae	ssRNA(+)	10671	GenBank	partial	II - Cosmopolitan	Peru	Peru	Homo sapiens	blood	2021-04-12	Dengue virus 2 isolate FPJ01523/JUN-PER/2021 polyprotein (POLY) gene, complete cds
ON123642.1	Espejo,V.I., Troncos,G.M., Cruz,C.D., Olivos,J.M., Ramos,R.E., Chuquirachi,F.J., Ocana,V.R., Holguin,C.E., Ampuero,J.S., Tinoco,Y.O., Graf,P.C.	2022-04-05T00:00:00Z	FPJ01518/JUN-PER/2021	Dengue virus	Flavivirus	Flaviviridae	ssRNA(+)	10671	GenBank	partial	II - Cosmopolitan	Peru	Peru	Homo sapiens	blood	2021-04-08	Dengue virus 2 isolate FPJ01518/JUN-PER/2021 polyprotein (POLY) gene, complete cds
ON123641.1	Espejo,V.I., Troncos,G.M., Cruz,C.D., Olivos,J.M., Ramos,R.E., Chuquirachi,F.J., Ocana,V.R., Holguin,C.E., Ampuero,J.S., Tinoco,Y.O., Graf,P.C.	2022-04-05T00:00:00Z	FPJ01508/JUN-PER/2021	Dengue virus	Flavivirus	Flaviviridae	ssRNA(+)	10671	GenBank	partial	II - Cosmopolitan	Peru	Peru	Homo sapiens	blood	2021-03-24	Dengue virus 2 isolate FPJ01508/JUN-PER/2021 polyprotein (POLY) gene, complete cds
ON123640.1	Espejo,V.I., Troncos,G.M., Cruz,C.D., Olivos,J.M., Ramos,R.E., Chuquirachi,F.J., Ocana,V.R., Holguin,C.E., Ampuero,J.S., Tinoco,Y.O., Graf,P.C.	2022-04-05T00:00:00Z	FPJ01494/JUN-PER/2021	Dengue virus	Flavivirus	Flaviviridae	ssRNA(+)	10671	GenBank	partial	II - Cosmopolitan	Peru	Peru	Homo sapiens	blood	2021-03-08	Dengue virus 2 isolate FPJ01494/JUN-PER/2021 polyprotein (POLY) gene, complete cds
ON123639.1	Espejo,V.I., Troncos,G.M., Cruz,C.D., Olivos,J.M., Ramos,R.E., Chuquirachi,F.J., Ocana,V.R., Holguin,C.E., Ampuero,J.S., Tinoco,Y.O., Graf,P.C.	2022-04-05T00:00:00Z	FPJ01491/JUN-PER/2021	Dengue virus	Flavivirus	Flaviviridae	ssRNA(+)	10671	GenBank	partial	II - Cosmopolitan	Peru	Peru	Homo sapiens	blood	2021-03-04	Dengue virus 2 isolate FPJ01491/JUN-PER/2021 polyprotein (POLY) gene, complete cds
ON123638.1	Espejo,V.I., Troncos,G.M., Cruz,C.D., Olivos,J.M., Ramos,R.E., Chuquirachi,F.J., Ocana,V.R., Holguin,C.E., Ampuero,J.S., Tinoco,Y.O., Graf,P.C.	2022-04-05T00:00:00Z	FPJ01489/JUN-PER/2021	Dengue virus	Flavivirus	Flaviviridae	ssRNA(+)	10671	GenBank	partial	II - Cosmopolitan	Peru	Peru	Homo sapiens	blood	2021-03-01	Dengue virus 2 isolate FPJ01489/JUN-PER/2021 polyprotein (POLY) gene, complete cds
ON123637.1	Espejo,V.I., Troncos,G.M., Cruz,C.D., Olivos,J.M., Ramos,R.E., Chuquirachi,F.J., Ocana,V.R., Holguin,C.E., Ampuero,J.S., Tinoco,Y.O., Graf,P.C.	2022-04-05T00:00:00Z	FPG00675/AMA-PER/2021	Dengue virus	Flavivirus	Flaviviridae	ssRNA(+)	10671	GenBank	partial	II - Cosmopolitan	Peru	Peru	Homo sapiens	blood	2021-08-20	Dengue virus 2 isolate FPG00675/AMA-PER/2021 polyprotein (POLY) gene, complete cds
ON123636.1	Espejo,V.I., Troncos,G.M., Cruz,C.D., Olivos,J.M., Ramos,R.E., Chuquirachi,F.J., Ocana,V.R., Holguin,C.E., Ampuero,J.S., Tinoco,Y.O., Graf,P.C.	2022-04-05T00:00:00Z	FPG00671/AMA-PER/2021	Dengue virus	Flavivirus	Flaviviridae	ssRNA(+)	10671	GenBank	partial	II - Cosmopolitan	Peru	Peru	Homo sapiens	blood	2021-08-17	Dengue virus 2 isolate FPG00671/AMA-PER/2021 polyprotein (POLY) gene, complete cds
ON123635.1	Espejo,V.I., Troncos,G.M., Cruz,C.D., Olivos,J.M., Ramos,R.E., Chuquirachi,F.J., Ocana,V.R., Holguin,C.E., Ampuero,J.S., Tinoco,Y.O., Graf,P.C.	2022-04-05T00:00:00Z	FPG00668/AMA-PER/2021	Dengue virus	Flavivirus	Flaviviridae	ssRNA(+)	10671	GenBank	partial	II - Cosmopolitan	Peru	Peru	Homo sapiens	blood	2021-08-13	Dengue virus 2 isolate FPG00668/AMA-PER/2021 polyprotein (POLY) gene, complete cds
ON123634.1	Espejo,V.I., Troncos,G.M., Cruz,C.D., Olivos,J.M., Ramos,R.E., Chuquirachi,F.J., Ocana,V.R., Holguin,C.E., Ampuero,J.S., Tinoco,Y.O., Graf,P.C.	2022-04-05T00:00:00Z	FPG00664/AMA-PER/2021	Dengue virus	Flavivirus	Flaviviridae	ssRNA(+)	10671	GenBank	partial	II - Cosmopolitan	Peru	Peru	Homo sapiens	blood	2021-08-10	Dengue virus 2 isolate FPG00664/AMA-PER/2021 polyprotein (POLY) gene, complete cds
ON123633.1	Espejo,V.I., Troncos,G.M., Cruz,C.D., Olivos,J.M., Ramos,R.E., Chuquirachi,F.J., Ocana,V.R., Holguin,C.E., Ampuero,J.S., Tinoco,Y.O., Graf,P.C.	2022-04-05T00:00:00Z	FPG00662/AMA-PER/2021	Dengue virus	Flavivirus	Flaviviridae	ssRNA(+)	10671	GenBank	partial	II - Cosmopolitan	Peru	Peru	Homo sapiens	blood	2021-08-10	Dengue virus 2 isolate FPG00662/AMA-PER/2021 polyprotein (POLY) gene, complete cds
ON123632.1	Espejo,V.I., Troncos,G.M., Cruz,C.D., Olivos,J.M., Ramos,R.E., Chuquirachi,F.J., Ocana,V.R., Holguin,C.E., Ampuero,J.S., Tinoco,Y.O., Graf,P.C.	2022-04-05T00:00:00Z	FPG00634/AMA-PER/2021	Dengue virus	Flavivirus	Flaviviridae	ssRNA(+)	10671	GenBank	partial	II - Cosmopolitan	Peru	Peru	Homo sapiens	blood	2021-07-05	Dengue virus 2 isolate FPG00634/AMA-PER/2021 polyprotein (POLY) gene, complete cds
ON123631.1	Espejo,V.I., Troncos,G.M., Cruz,C.D., Olivos,J.M., Ramos,R.E., Chuquirachi,F.J., Ocana,V.R., Holguin,C.E., Ampuero,J.S., Tinoco,Y.O., Graf,P.C.	2022-04-05T00:00:00Z	FPG00618/AMA-PER/2021	Dengue virus	Flavivirus	Flaviviridae	ssRNA(+)	10671	GenBank	partial	II - Cosmopolitan	Peru	Peru	Homo sapiens	blood	2021-06-08	Dengue virus 2 isolate FPG00618/AMA-PER/2021 polyprotein (POLY) gene, complete cds
ON123630.1	Espejo,V.I., Troncos,G.M., Cruz,C.D., Olivos,J.M., Ramos,R.E., Chuquirachi,F.J., Ocana,V.R., Holguin,C.E., Ampuero,J.S., Tinoco,Y.O., Graf,P.C.	2022-04-05T00:00:00Z	FPG00617/AMA-PER/2021	Dengue virus	Flavivirus	Flaviviridae	ssRNA(+)	10671	GenBank	partial	II - Cosmopolitan	Peru	Peru	Homo sapiens	blood	2021-06-08	Dengue virus 2 isolate FPG00617/AMA-PER/2021 polyprotein (POLY) gene, complete cds
ON123629.1	Espejo,V.I., Troncos,G.M., Cruz,C.D., Olivos,J.M., Ramos,R.E., Chuquirachi,F.J., Ocana,V.R., Holguin,C.E., Ampuero,J.S., Tinoco,Y.O., Graf,P.C.	2022-04-05T00:00:00Z	FPG00616/AMA-PER/2021	Dengue virus	Flavivirus	Flaviviridae	ssRNA(+)	10671	GenBank	partial	II - Cosmopolitan	Peru	Peru	Homo sapiens	blood	2021-06-08	Dengue virus 2 isolate FPG00616/AMA-PER/2021 polyprotein (POLY) gene, complete cds
ON123628.1	Espejo,V.I., Troncos,G.M., Cruz,C.D., Olivos,J.M., Ramos,R.E., Chuquirachi,F.J., Ocana,V.R., Holguin,C.E., Ampuero,J.S., Tinoco,Y.O., Graf,P.C.	2022-04-05T00:00:00Z	FPG00602/AMA-PER/2021	Dengue virus	Flavivirus	Flaviviridae	ssRNA(+)	10671	GenBank	partial	II - Cosmopolitan	Peru	Peru	Homo sapiens	blood	2021-04-26	Dengue virus 2 isolate FPG00602/AMA-PER/2021 polyprotein (POLY) gene, complete cds
ON123627.1	Espejo,V.I., Troncos,G.M., Cruz,C.D., Olivos,J.M., Ramos,R.E., Chuquirachi,F.J., Ocana,V.R., Holguin,C.E., Ampuero,J.S., Tinoco,Y.O., Graf,P.C.	2022-04-05T00:00:00Z	FPG00589/AMA-PER/2021	Dengue virus	Flavivirus	Flaviviridae	ssRNA(+)	10671	GenBank	partial	III - Southern Asian-American	Peru	Peru	Homo sapiens	blood	2021-04-06	Dengue virus 2 isolate FPG00589/AMA-PER/2021 polyprotein (POLY) gene, complete cds
ON123626.1	Espejo,V.I., Troncos,G.M., Cruz,C.D., Olivos,J.M., Ramos,R.E., Chuquirachi,F.J., Ocana,V.R., Holguin,C.E., Ampuero,J.S., Tinoco,Y.O., Graf,P.C.	2022-04-05T00:00:00Z	FPG00588/AMA-PER/2021	Dengue virus	Flavivirus	Flaviviridae	ssRNA(+)	10671	GenBank	partial	II - Cosmopolitan	Peru	Peru	Homo sapiens	blood	2021-04-05	Dengue virus 2 isolate FPG00588/AMA-PER/2021 polyprotein (POLY) gene, complete cds
ON123625.1	Espejo,V.I., Troncos,G.M., Cruz,C.D., Olivos,J.M., Ramos,R.E., Chuquirachi,F.J., Ocana,V.R., Holguin,C.E., Ampuero,J.S., Tinoco,Y.O., Graf,P.C.	2022-04-05T00:00:00Z	FPG00574-2/AMA-PER/2021	Dengue virus	Flavivirus	Flaviviridae	ssRNA(+)	10671	GenBank	partial	III - Southern Asian-American	Peru	Peru	Homo sapiens	blood	2021-03-02	Dengue virus 2 isolate FPG00574-2/AMA-PER/2021 polyprotein (POLY) gene, complete cds
ON123624.1	Espejo,V.I., Troncos,G.M., Cruz,C.D., Olivos,J.M., Ramos,R.E., Chuquirachi,F.J., Ocana,V.R., Holguin,C.E., Ampuero,J.S., Tinoco,Y.O., Graf,P.C.	2022-04-05T00:00:00Z	FPG00573-2/AMA-PER/2021	Dengue virus	Flavivirus	Flaviviridae	ssRNA(+)	10671	GenBank	partial	III - Southern Asian-American	Peru	Peru	Homo sapiens	blood	2021-03-02	Dengue virus 2 isolate FPG00573-2/AMA-PER/2021 polyprotein (POLY) gene, complete cds
ON123623.1	Espejo,V.I., Troncos,G.M., Cruz,C.D., Olivos,J.M., Ramos,R.E., Chuquirachi,F.J., Ocana,V.R., Holguin,C.E., Ampuero,J.S., Tinoco,Y.O., Graf,P.C.	2022-04-05T00:00:00Z	FPG00572-2/AMA-PER/2021	Dengue virus	Flavivirus	Flaviviridae	ssRNA(+)	10671	GenBank	partial	III - Southern Asian-American	Peru	Peru	Homo sapiens	blood	2021-03-01	Dengue virus 2 isolate FPG00572-2/AMA-PER/2021 polyprotein (POLY) gene, complete cds
ON123622.1	Espejo,V.I., Troncos,G.M., Cruz,C.D., Olivos,J.M., Ramos,R.E., Chuquirachi,F.J., Ocana,V.R., Holguin,C.E., Ampuero,J.S., Tinoco,Y.O., Graf,P.C.	2022-04-05T00:00:00Z	FPG00557-2/AMA-PER/2021	Dengue virus	Flavivirus	Flaviviridae	ssRNA(+)	10671	GenBank	partial	III - Southern Asian-American	Peru	Peru	Homo sapiens	blood	2021-02-15	Dengue virus 2 isolate FPG00557-2/AMA-PER/2021 polyprotein (POLY) gene, complete cds
ON123621.1	Espejo,V.I., Troncos,G.M., Cruz,C.D., Olivos,J.M., Ramos,R.E., Chuquirachi,F.J., Ocana,V.R., Holguin,C.E., Ampuero,J.S., Tinoco,Y.O., Graf,P.C.	2022-04-05T00:00:00Z	FPG00556-2/AMA-PER/2021	Dengue virus	Flavivirus	Flaviviridae	ssRNA(+)	10671	GenBank	partial	III - Southern Asian-American	Peru	Peru	Homo sapiens	blood	2021-02-15	Dengue virus 2 isolate FPG00556-2/AMA-PER/2021 polyprotein (POLY) gene, complete cds
ON123620.1	Espejo,V.I., Troncos,G.M., Cruz,C.D., Olivos,J.M., Ramos,R.E., Chuquirachi,F.J., Ocana,V.R., Holguin,C.E., Ampuero,J.S., Tinoco,Y.O., Graf,P.C.	2022-04-05T00:00:00Z	FPG00541/AMA-PER/2021	Dengue virus	Flavivirus	Flaviviridae	ssRNA(+)	10671	GenBank	partial	III - Southern Asian-American	Peru	Peru	Homo sapiens	blood	2021-01-25	Dengue virus 2 isolate FPG00541/AMA-PER/2021 polyprotein (POLY) gene, complete cds
ON109598.1	Medigeshi,G., Pandey,R., Agrawal,T., Saraswat,S., Ananthraj,A., Chandele,A., Maurya,R., Kanakan,A., Chattopadhyay,P., Swaminathan,A., Saifi,S.	2022-04-04T00:00:00Z	S9	Dengue virus	Flavivirus	Flaviviridae	ssRNA(+)	10511	GenBank	partial	0	India	India	Homo sapiens	blood	1905-07-13	Dengue virus 2 isolate S9 polyprotein (POLY) gene, complete cds
ON005157.1	Jones,A.R., Rutvisuttinunt,W., Chinnawirotpisan,P., Manasatienkit,W., Ongajchaowlerd,P., Ellison,D.W., Kalayanarooj,S., Suntarattiwong,P., Fernandez,S., Klungthong,C.	2022-03-22T00:00:00Z	00855/11	Dengue virus	Flavivirus	Flaviviridae	ssRNA(+)	10543	GenBank	partial	0	Thailand	Thailand	Homo sapiens	0	2011-07-15	Dengue virus 2 isolate 00855/11 polyprotein (POLY) gene, complete cds
OM791802.1	Santiago,G.A., Flores,B., Gonzalez-Morales,G., Charriez,K.N., Marcelo-Nique,A., Garcia-Mendoza,M.P., Munoz-Jordan,J.L.	2022-02-28T00:00:00Z	PE/DB276/2018	Dengue virus	Flavivirus	Flaviviridae	ssRNA(+)	10371	GenBank	partial	South East Asian-American	Peru	Peru	Homo sapiens	blood	2018-12-31	Dengue virus 2 isolate PE/DB276/2018 polyprotein (POLY) gene, complete cds
OM791801.1	Santiago,G.A., Flores,B., Gonzalez-Morales,G., Charriez,K.N., Marcelo-Nique,A., Garcia-Mendoza,M.P., Munoz-Jordan,J.L.	2022-02-28T00:00:00Z	PE/DB275/2019	Dengue virus	Flavivirus	Flaviviridae	ssRNA(+)	10273	GenBank	partial	Cosmopolitan	Peru	Peru	Homo sapiens	blood	2019-09-28	Dengue virus 2 isolate PE/DB275/2019 polyprotein (POLY) gene, complete cds
OM791800.1	Santiago,G.A., Flores,B., Gonzalez-Morales,G., Charriez,K.N., Marcelo-Nique,A., Garcia-Mendoza,M.P., Munoz-Jordan,J.L.	2022-02-28T00:00:00Z	PE/DB274/2019	Dengue virus	Flavivirus	Flaviviridae	ssRNA(+)	10273	GenBank	partial	Cosmopolitan	Peru	Peru	Homo sapiens	blood	2019-09-26	Dengue virus 2 isolate PE/DB274/2019 polyprotein (POLY) gene, complete cds
OM744143.1	Fonseca,V., Giovanetti,M., Xavier,J., Mendonca,A.F., Pereira,L., Oliveira,C., Paixao,L., Fritsch,H., Tosta,S., Rodrigues,E., Castro,E., Silva,V., Alcantara,L.	2022-05-09T00:00:00Z	GO-BC12-2021	Dengue virus	Flavivirus	Flaviviridae	ssRNA(+)	9289	GenBank	partial	0	Brazil: Aparecida de Goiania, Goias	Brazil	Homo sapiens	blood	2021-11-29	Dengue virus 2 isolate GO-BC12-2021 polyprotein (POLY) gene, partial cds
OM730078.1	Yadav,P.D.	2022-02-22T00:00:00Z	MCL-21-H-11204_RNA-8485	Dengue virus	Flavivirus	Flaviviridae	ssRNA(+)	10692	GenBank	partial	0	India	India	Homo sapiens	blood	2021-11-16	Dengue virus 2 isolate MCL-21-H-11204_RNA-8485 polyprotein (POLY) gene, complete cds
OM700181.1	Yadav,P.D.	2022-02-21T00:00:00Z	MCL-21-H-10977	Dengue virus	Flavivirus	Flaviviridae	ssRNA(+)	10690	GenBank	partial	0	India	India	Homo sapiens	blood	2021-11-16	Dengue virus 2 isolate MCL-21-H-10977 polyprotein (POLY) gene, complete cds
OM700180.1	Yadav,P.D.	2022-02-21T00:00:00Z	MCL-21-H-10974_RNA-8474	Dengue virus	Flavivirus	Flaviviridae	ssRNA(+)	10685	GenBank	partial	0	India	India	Homo sapiens	blood	2021-11-16	Dengue virus 2 isolate MCL-21-H-10974_RNA-8474 polyprotein (POLY) gene, partial cds
OM698821.1	Yadav,P.D.	2022-02-21T00:00:00Z	MCL-21-H-11400_RNA-8508	Dengue virus	Flavivirus	Flaviviridae	ssRNA(+)	10719	GenBank	partial	0	India	India	Homo sapiens	blood	2021-11-16	Dengue virus 2 isolate MCL-21-H-11400_RNA-8508 polyprotein (POLY) gene, complete cds
OM681318.1	Yadav,P.D.	2022-02-20T00:00:00Z	MCL-21-H-11408	Dengue virus	Flavivirus	Flaviviridae	ssRNA(+)	10722	GenBank	complete	0	India	India	Homo sapiens	blood	2021-11-16	Dengue virus 2 isolate MCL-21-H-11408, complete genome
OM680963.1	Yadav,P.D.	2022-02-20T00:00:00Z	MCL-21-H-11369	Dengue virus	Flavivirus	Flaviviridae	ssRNA(+)	10721	GenBank	partial	0	India	India	Homo sapiens	blood	2021-11-16	Dengue virus 2 isolate MCL-21-H-11369 polyprotein (POLY) gene, complete cds
OM648092.1	Yadav,P.D.	2022-02-15T00:00:00Z	India_MCL-21-H-10601_8463_2021	Dengue virus	Flavivirus	Flaviviridae	ssRNA(+)	10697	GenBank	partial	0	India	India	Homo sapiens	blood	2021-10-20	Dengue virus 2 isolate India_MCL-21-H-10601_8463_2021 polyprotein (POLY) gene, complete cds
OM639993.1	Yadav,P.D.	2022-02-15T00:00:00Z	MCL-21-H-11634	Dengue virus	Flavivirus	Flaviviridae	ssRNA(+)	10670	GenBank	partial	0	India	India	Homo sapiens	blood	2021-11-16	Dengue virus 2 isolate MCL-21-H-11634 polyprotein (POLY) gene, partial cds
OM639992.1	Yadav,P.D.	2022-02-15T00:00:00Z	MCL-21-H-11449	Dengue virus	Flavivirus	Flaviviridae	ssRNA(+)	10716	GenBank	partial	0	India	India	Homo sapiens	blood	2021-11-16	Dengue virus 2 isolate MCL-21-H-11449 polyprotein (POLY) gene, complete cds
OM639991.1	Yadav,P.D.	2022-02-15T00:00:00Z	MCL-21-H-11427	Dengue virus	Flavivirus	Flaviviridae	ssRNA(+)	10721	GenBank	partial	0	India	India	Homo sapiens	blood	2021-11-16	Dengue virus 2 isolate MCL-21-H-11427 polyprotein (POLY) gene, complete cds
OM639990.1	Yadav,P.D.	2022-02-15T00:00:00Z	MCL-21-H-11405	Dengue virus	Flavivirus	Flaviviridae	ssRNA(+)	10708	GenBank	partial	0	India	India	Homo sapiens	blood	2021-11-16	Dengue virus 2 isolate MCL-21-H-11405 polyprotein (POLY) gene, complete cds
OM639989.1	Yadav,P.D.	2022-02-15T00:00:00Z	MCL-21-H-11403	Dengue virus	Flavivirus	Flaviviridae	ssRNA(+)	10713	GenBank	partial	0	India	India	Homo sapiens	blood	2021-11-16	Dengue virus 2 isolate MCL-21-H-11403 polyprotein (POLY) gene, complete cds
OM639988.1	Yadav,P.D.	2022-02-15T00:00:00Z	MCL-21-H-11399	Dengue virus	Flavivirus	Flaviviridae	ssRNA(+)	10710	GenBank	partial	0	India	India	Homo sapiens	blood	2021-11-16	Dengue virus 2 isolate MCL-21-H-11399 polyprotein (POLY) gene, complete cds
OM639987.1	Yadav,P.D.	2022-02-15T00:00:00Z	MCL-21-H-11392	Dengue virus	Flavivirus	Flaviviridae	ssRNA(+)	10711	GenBank	partial	0	India	India	Homo sapiens	blood	2021-11-16	Dengue virus 2 isolate MCL-21-H-11392 polyprotein (POLY) gene, complete cds
OM639986.1	Yadav,P.D.	2022-02-15T00:00:00Z	MCL-21-H-11381	Dengue virus	Flavivirus	Flaviviridae	ssRNA(+)	10720	GenBank	partial	0	India	India	Homo sapiens	blood	2021-11-16	Dengue virus 2 isolate MCL-21-H-11381 polyprotein (POLY) gene, complete cds
OM639985.1	Yadav,P.D.	2022-02-15T00:00:00Z	MCL-21-H-11373	Dengue virus	Flavivirus	Flaviviridae	ssRNA(+)	10712	GenBank	partial	0	India	India	Homo sapiens	blood	2021-11-16	Dengue virus 2 isolate MCL-21-H-11373 polyprotein (POLY) gene, complete cds
OM639984.1	Yadav,P.D.	2022-02-15T00:00:00Z	MCL-21-H-11365	Dengue virus	Flavivirus	Flaviviridae	ssRNA(+)	10687	GenBank	partial	0	India	India	Homo sapiens	blood	2021-11-16	Dengue virus 2 isolate MCL-21-H-11365 polyprotein (POLY) gene, complete cds
OM639983.1	Yadav,P.D.	2022-02-15T00:00:00Z	MCL-21-H-11361	Dengue virus	Flavivirus	Flaviviridae	ssRNA(+)	10709	GenBank	partial	0	India	India	Homo sapiens	blood	2021-11-16	Dengue virus 2 isolate MCL-21-H-11361 polyprotein (POLY) gene, partial cds
OM639982.1	Yadav,P.D.	2022-02-15T00:00:00Z	MCL-21-H-11025	Dengue virus	Flavivirus	Flaviviridae	ssRNA(+)	10723	GenBank	complete	0	India	India	Homo sapiens	blood	2021-09-14	Dengue virus 2 isolate MCL-21-H-11025, complete genome
OM639981.1	Yadav,P.D.	2022-02-15T00:00:00Z	MCL-21-H-11017	Dengue virus	Flavivirus	Flaviviridae	ssRNA(+)	10707	GenBank	partial	0	India	India	Homo sapiens	blood	2021-09-02	Dengue virus 2 isolate MCL-21-H-11017 polyprotein (POLY) gene, complete cds
OM639980.1	Yadav,P.D.	2022-02-15T00:00:00Z	MCL-21-H-10947	Dengue virus	Flavivirus	Flaviviridae	ssRNA(+)	10706	GenBank	partial	0	India	India	Homo sapiens	blood	2021-11-16	Dengue virus 2 isolate MCL-21-H-10947 polyprotein (POLY) gene, complete cds
OM639979.1	Yadav,P.D.	2022-02-15T00:00:00Z	MCL-21-H-10600	Dengue virus	Flavivirus	Flaviviridae	ssRNA(+)	10677	GenBank	partial	0	India	India	Homo sapiens	blood	2021-10-19	Dengue virus 2 isolate MCL-21-H-10600 polyprotein (POLY) gene, complete cds
OM505022.1	Wong-Arambula,C.E., Rodriguez-Maldonado,A.P., Fuentes-Cuevas,C.H., Duran-Ayala,D., Torres-Rodriguez,Mdl.L., Rivero-Arredondo,V., Serrano-Gutierrez,S., Aparicio-Antonio,M., Rosales-Jimenez,C., del Mazo-Lopez,J.C., Hernandez-Rivas,L., Lopez-Martinez,I., Ramirez-Gonzalez,J.E., Vazquez-Pichardo,M.	2022-02-09T00:00:00Z	594	Dengue virus	Flavivirus	Flaviviridae	ssRNA(+)	10679	GenBank	partial	0	Mexico: Coahuila	Mexico	Homo sapiens	blood	2021-09-21	Dengue virus 2 isolate 594 polyprotein (POLY) gene, complete cds
OM505021.1	Wong-Arambula,C.E., Rodriguez-Maldonado,A.P., Fuentes-Cuevas,C.H., Duran-Ayala,D., Torres-Rodriguez,Mdl.L., Rivero-Arredondo,V., Serrano-Gutierrez,S., Aparicio-Antonio,M., Rosales-Jimenez,C., del Mazo-Lopez,J.C., Hernandez-Rivas,L., Lopez-Martinez,I., Ramirez-Gonzalez,J.E., Vazquez-Pichardo,M.	2022-02-09T00:00:00Z	362	Dengue virus	Flavivirus	Flaviviridae	ssRNA(+)	10679	GenBank	partial	0	Mexico: Michoacan	Mexico	Homo sapiens	blood	2021-06-30	Dengue virus 2 isolate 362 polyprotein (POLY) gene, complete cds
OM368352.1	Su,W., Cao,Y., Lu,W.	2022-01-29T00:00:00Z	19XN13236_D2	Dengue virus	Flavivirus	Flaviviridae	ssRNA(+)	10654	GenBank	partial	0	China: Guangzhou	China	Homo sapiens	0	2018-05-17	Dengue virus 2 isolate 19XN13236_D2 polyprotein (POLY) gene, complete cds
OM368351.1	Su,W., Cao,Y., Lu,W.	2022-01-29T00:00:00Z	19XN23153_D2	Dengue virus	Flavivirus	Flaviviridae	ssRNA(+)	10624	GenBank	partial	0	China: Guangzhou	China	Homo sapiens	0	2019-09-16	Dengue virus 2 isolate 19XN23153_D2 polyprotein (POLY) gene, complete cds
OM349569.1	Su,W., Cao,Y., Lu,W.	2022-01-29T00:00:00Z	19XN50989L_D2	Dengue virus	Flavivirus	Flaviviridae	ssRNA(+)	9848	GenBank	partial	0	China: Guangzhou	China	Homo sapiens	0	2019-09-25	Dengue virus 2 isolate 19XN50989L_D2 polyprotein (POLY) gene, partial cds
OM317566.1	Key,A., Waggoner,J., Ali,I.M., Piantadosi,A.L., Collins,M.	2022-01-24T00:00:00Z	DSG2020_061	Dengue virus	Flavivirus	Flaviviridae	ssRNA(+)	10380	GenBank	partial	Cosmopolitan	Cameroon: Africa	Cameroon	Homo sapiens	blood	2020-08-02	Dengue virus 2 isolate DSG2020_061 polyprotein (POLY) gene, complete cds
OM317565.1	Key,A., Waggoner,J., Ali,I.M., Piantadosi,A.L., Collins,M.	2022-01-24T00:00:00Z	DSG2020_345	Dengue virus	Flavivirus	Flaviviridae	ssRNA(+)	10630	GenBank	partial	Cosmopolitan	Cameroon: Africa	Cameroon	Homo sapiens	blood	2020-06-24	Dengue virus 2 isolate DSG2020_345 polyprotein (POLY) gene, complete cds
OL469513.1	Dieng,I.	2021-11-18T00:00:00Z	SH291129	Dengue virus	Flavivirus	Flaviviridae	ssRNA(+)	10176	GenBank	partial	0	Cote d'Ivoire	Cote d'Ivoire	Homo sapiens	blood	2017-05-04	Dengue virus 2 isolate SH291129 polyprotein (POLY) gene, complete cds
OL469512.1	Dieng,I.	2021-11-18T00:00:00Z	SH291122	Dengue virus	Flavivirus	Flaviviridae	ssRNA(+)	10176	GenBank	partial	0	Cote d'Ivoire	Cote d'Ivoire	Homo sapiens	blood	2017-04-30	Dengue virus 2 isolate SH291122 polyprotein (POLY) gene, complete cds
OL435143.1	Bohl,J.A., Manning,J.E., Lay,S., Chea,S., Brooks,C., Ahyong,V.	2021-11-15T00:00:00Z	109-358	Dengue virus	Flavivirus	Flaviviridae	ssRNA(+)	10464	GenBank	partial	cosmopolitan	Cambodia	Cambodia	Homo sapiens	blood	2020-08	Dengue virus type 2 isolate 109-358 polyprotein (POLY) gene, partial cds
OL420733.1	Bohl,J.A., Manning,J.E., Lay,S., Chea,S., Brooks,C., Ahyong,V.	2021-11-14T00:00:00Z	109-0008	Dengue virus	Flavivirus	Flaviviridae	ssRNA(+)	10703	GenBank	partial	Cosmopolitan	Cambodia	Cambodia	Homo sapiens	blood	2019-07	Dengue virus type 2 isolate 109-0008 polyprotein (POLY) gene, complete cds
OL414765.1	Bohl,J.A., Manning,J.E., Lay,S., Chea,S., Brooks,C., Ahyong,V.	2021-11-14T00:00:00Z	109-0349_2020-08-10	Dengue virus	Flavivirus	Flaviviridae	ssRNA(+)	10322	GenBank	partial	Cosmopolitan	Cambodia	Cambodia	Homo sapiens	blood	2020-08	Dengue virus type 2 isolate 109-0349_2020-08-10 polyprotein (POLY) gene, partial cds
OL414764.1	Bohl,J.A., Manning,J.E., Lay,S., Chea,S., Brooks,C., Ahyong,V.	2021-11-14T00:00:00Z	109-0372_2020-08-27	Dengue virus	Flavivirus	Flaviviridae	ssRNA(+)	10638	GenBank	partial	Cosmopolitan	Cambodia	Cambodia	Homo sapiens	blood	2020-08	Dengue virus type 2 isolate 109-0372_2020-08-27 polyprotein (POLY) gene, complete cds
OL414763.1	Bohl,J.A., Manning,J.E., Lay,S., Chea,S., Brooks,C., Ahyong,V.	2021-11-14T00:00:00Z	109-0039_2019-08-02	Dengue virus	Flavivirus	Flaviviridae	ssRNA(+)	10695	GenBank	partial	Cosmopolitan	Cambodia	Cambodia	Homo sapiens	blood	2019-08	Dengue virus type 2 isolate 109-0039_2019-08-02 polyprotein (POLY) gene, complete cds
OL414762.1	Bohl,J.A., Manning,J.E., Lay,S., Chea,S., Brooks,C., Ahyong,V.	2021-11-14T00:00:00Z	109-0001_2019-07-23	Dengue virus	Flavivirus	Flaviviridae	ssRNA(+)	10569	GenBank	partial	Cosmopolitan	Cambodia	Cambodia	Homo sapiens	blood	2019-07	Dengue virus type 2 isolate 109-0001_2019-07-23 polyprotein (POLY) gene, complete cds
OL414761.1	Bohl,J.A., Manning,J.E., Lay,S., Chea,S., Brooks,C., Ahyong,V.	2021-11-14T00:00:00Z	109-0020_2019-07-26	Dengue virus	Flavivirus	Flaviviridae	ssRNA(+)	10675	GenBank	partial	0	Cambodia	Cambodia	Homo sapiens	blood	2019-08	Dengue virus type 2 isolate 109-0020_2019-07-26 polyprotein (POLY) gene, complete cds
OL414760.1	Bohl,J.A., Manning,J.E., Lay,S., Chea,S., Brooks,C., Ahyong,V.	2021-11-14T00:00:00Z	100-0215_2019-08-16	Dengue virus	Flavivirus	Flaviviridae	ssRNA(+)	10674	GenBank	partial	Cosmopolitan	Cambodia	Cambodia	Homo sapiens	blood	2019-08	Dengue virus type 2 isolate 100-0215_2019-08-16 polyprotein (POLY) gene, complete cds
OL414759.1	Bohl,J.A., Manning,J.E., Lay,S., Chea,S., Brooks,C., Ahyong,V.	2021-11-14T00:00:00Z	100-0432_2019-06-28	Dengue virus	Flavivirus	Flaviviridae	ssRNA(+)	10695	GenBank	partial	Cosmopolitan	Cambodia	Cambodia	Homo sapiens	blood	2019-06	Dengue virus type 2 isolate 100-0432_2019-06-28 polyprotein (POLY) gene, complete cds
OL414758.1	Bohl,J.A., Manning,J.E., Lay,S., Chea,S., Brooks,C., Ahyong,V.	2021-11-14T00:00:00Z	109-0408_2020-09-23	Dengue virus	Flavivirus	Flaviviridae	ssRNA(+)	10623	GenBank	partial	Cosmopolitan	Cambodia	Cambodia	Homo sapiens	blood	2020-09	Dengue virus type 2 isolate 109-0408_2020-09-23 polyprotein (POLY) gene, complete cds
OL414757.1	Bohl,J.A., Manning,J.E., Lay,S., Chea,S., Brooks,C., Ahyong,V.	2021-11-14T00:00:00Z	109-0384_2020-09-01	Dengue virus	Flavivirus	Flaviviridae	ssRNA(+)	10711	GenBank	partial	Cosmopolitan	Cambodia	Cambodia	Homo sapiens	blood	2020-09	Dengue virus type 2 isolate 109-0384_2020-09-01 polyprotein (POLY) gene, complete cds
OL414756.1	Bohl,J.A., Manning,J.E., Lay,S., Chea,S., Brooks,C., Ahyong,V.	2021-11-14T00:00:00Z	109-0377_2020-08-29	Dengue virus	Flavivirus	Flaviviridae	ssRNA(+)	10696	GenBank	partial	Cosmopolitan	Cambodia	Cambodia	Homo sapiens	blood	2020-08	Dengue virus type 2 isolate 109-0377_2020-08-29 polyprotein (POLY) gene, complete cds
OL414755.1	Bohl,J.A., Manning,J.E., Lay,S., Chea,S., Brooks,C., Ahyong,V.	2021-11-14T00:00:00Z	109-0363_2020-08-13	Dengue virus	Flavivirus	Flaviviridae	ssRNA(+)	10100	GenBank	partial	Cosmopolitan	Cambodia	Cambodia	Homo sapiens	blood	2020-08	Dengue virus type 2 isolate 109-0363_2020-08-13 polyprotein (POLY) gene, partial cds
OL414754.1	Bohl,J.A., Manning,J.E., Lay,S., Chea,S., Brooks,C., Ahyong,V.	2021-11-14T00:00:00Z	109-0353_2020-08-10	Dengue virus	Flavivirus	Flaviviridae	ssRNA(+)	10691	GenBank	partial	Cosmopolitan	Cambodia	Cambodia	Homo sapiens	blood	2020-08	Dengue virus type 2 isolate 109-0353_2020-08-10 polyprotein (POLY) gene, complete cds
OL414753.1	Bohl,J.A., Manning,J.E., Lay,S., Chea,S., Brooks,C., Ahyong,V.	2021-11-14T00:00:00Z	109-0352_2020-08-09	Dengue virus	Flavivirus	Flaviviridae	ssRNA(+)	10693	GenBank	partial	Cosmopolitan	Cambodia	Cambodia	Homo sapiens	blood	2020-08	Dengue virus type 2 isolate 109-0352_2020-08-09 polyprotein (POLY) gene, complete cds
OL414752.1	Bohl,J.A., Manning,J.E., Lay,S., Chea,S., Brooks,C., Ahyong,V.	2021-11-14T00:00:00Z	109-0334_2020-07-29	Dengue virus	Flavivirus	Flaviviridae	ssRNA(+)	10714	GenBank	partial	Cosmopolitan	Cambodia	Cambodia	Homo sapiens	blood	2020-07	Dengue virus type 2 isolate 109-0334_2020-07-29 polyprotein (POLY) gene, complete cds
OL414751.1	Bohl,J.A., Manning,J.E., Lay,S., Chea,S., Brooks,C., Ahyong,V.	2021-11-14T00:00:00Z	109-0318_2020-07-14	Dengue virus	Flavivirus	Flaviviridae	ssRNA(+)	10713	GenBank	partial	Cosmopolitan	Cambodia	Cambodia	Homo sapiens	blood	2020-07	Dengue virus type 2 isolate 109-0318_2020-07-14 polyprotein (POLY) gene, complete cds
OL414750.1	Bohl,J.A., Manning,J.E., Lay,S., Chea,S., Brooks,C., Ahyong,V.	2021-11-14T00:00:00Z	109-0304_2020-07-05	Dengue virus	Flavivirus	Flaviviridae	ssRNA(+)	10693	GenBank	partial	Cosmopolitan	Cambodia	Cambodia	Homo sapiens	blood	2020-07	Dengue virus type 2 isolate 109-0304_2020-07-05 polyprotein (POLY) gene, complete cds
OL414749.1	Bohl,J.A., Manning,J.E., Lay,S., Chea,S., Brooks,C., Ahyong,V.	2021-11-14T00:00:00Z	109-0293_2020-06-17	Dengue virus	Flavivirus	Flaviviridae	ssRNA(+)	10608	GenBank	partial	Cosmopolitan	Cambodia	Cambodia	Homo sapiens	blood	2020-06	Dengue virus type 2 isolate 109-0293_2020-06-17 polyprotein (POLY) gene, complete cds
OL414747.1	Bohl,J.A., Manning,J.E., Lay,S., Chea,S., Brooks,C., Ahyong,V.	2021-11-14T00:00:00Z	100-0034_2019-08-20	Dengue virus	Flavivirus	Flaviviridae	ssRNA(+)	10572	GenBank	partial	0	Cambodia	Cambodia	Homo sapiens	blood	2019-08	Dengue virus type 2 isolate 100-0034_2019-08-20 polyprotein (POLY) gene, complete cds
OL414746.1	Bohl,J.A., Manning,J.E., Lay,S., Chea,S., Brooks,C., Ahyong,V.	2021-11-14T00:00:00Z	109-0292_2020-06-16	Dengue virus	Flavivirus	Flaviviridae	ssRNA(+)	10569	GenBank	partial	0	Cambodia	Cambodia	Homo sapiens	blood	2020-06	Dengue virus 2 isolate 109-0292_2020-06-16 polyprotein (POLY) gene, complete cds
OL414745.1	Bohl,J.A., Manning,J.E., Lay,S., Chea,S., Brooks,C., Ahyong,V.	2021-11-14T00:00:00Z	109-0045_2019-08-06	Dengue virus	Flavivirus	Flaviviridae	ssRNA(+)	10572	GenBank	partial	0	Cambodia	Cambodia	Homo sapiens	blood	2019-08	Dengue virus type 2 isolate 109-0045_2019-08-06 polyprotein (POLY) gene, complete cds
OL414744.1	Bohl,J.A., Manning,J.E., Lay,S., Chea,S., Brooks,C., Ahyong,V.	2021-11-14T00:00:00Z	100-0039_2019-07-15	Dengue virus	Flavivirus	Flaviviridae	ssRNA(+)	10573	GenBank	partial	0	Cambodia	Cambodia	Homo sapiens	blood	2019-07	Dengue virus type 2 isolate 100-0039_2019-07-15 polyprotein (POLY) gene, complete cds
OL414743.1	Bohl,J.A., Manning,J.E., Lay,S., Chea,S., Brooks,C., Ahyong,V.	2021-11-14T00:00:00Z	100-0072_2019-04-04	Dengue virus	Flavivirus	Flaviviridae	ssRNA(+)	10573	GenBank	partial	0	Cambodia	Cambodia	Homo sapiens	blood	2019-05	Dengue virus type 2 isolate 100-0072_2019-04-04 polyprotein (POLY) gene, complete cds
OL414742.1	Bohl,J.A., Manning,J.E., Lay,S., Chea,S., Brooks,C., Ahyong,V.	2021-11-14T00:00:00Z	100-0153_2019-06-23	Dengue virus	Flavivirus	Flaviviridae	ssRNA(+)	10572	GenBank	partial	0	Cambodia	Cambodia	Homo sapiens	blood	2019-06	Dengue virus type 2 isolate 100-0153_2019-06-23 polyprotein (POLY) gene, complete cds
OL414741.1	Bohl,J.A., Manning,J.E., Lay,S., Chea,S., Brooks,C., Ahyong,V.	2021-11-14T00:00:00Z	100-0277_2019-07-23	Dengue virus	Flavivirus	Flaviviridae	ssRNA(+)	10572	GenBank	partial	0	Cambodia	Cambodia	Homo sapiens	blood	2019-07	Dengue virus type 2 isolate 100-0277_2019-07-23 polyprotein (POLY) gene, complete cds
OL414740.1	Bohl,J.A., Manning,J.E., Lay,S., Chea,S., Brooks,C., Ahyong,V.	2021-11-14T00:00:00Z	100-0405_2019-06-27	Dengue virus	Flavivirus	Flaviviridae	ssRNA(+)	10572	GenBank	partial	0	Cambodia	Cambodia	Homo sapiens	blood	2019-06	Dengue virus type 2 isolate 100-0405_2019-06-27 polyprotein (POLY) gene, complete cds
OL414739.1	Bohl,J.A., Manning,J.E., Lay,S., Chea,S., Brooks,C., Ahyong,V.	2021-11-14T00:00:00Z	100-0427_2019-07-23	Dengue virus	Flavivirus	Flaviviridae	ssRNA(+)	10572	GenBank	partial	0	Cambodia	Cambodia	Homo sapiens	blood	2019-07	Dengue virus type 2 isolate 100-0427_2019-07-23 polyprotein (POLY) gene, complete cds
OL414738.1	Bohl,J.A., Manning,J.E., Lay,S., Chea,S., Brooks,C., Ahyong,V.	2021-11-14T00:00:00Z	100-0428_2019-07-19	Dengue virus	Flavivirus	Flaviviridae	ssRNA(+)	10572	GenBank	partial	0	Cambodia	Cambodia	Homo sapiens	blood	2019-06	Dengue virus type 2 isolate 100-0428_2019-07-19 polyprotein (POLY) gene, complete cds
OL414737.1	Bohl,J.A., Manning,J.E., Lay,S., Chea,S., Brooks,C., Ahyong,V.	2021-11-14T00:00:00Z	100-0477_2019-06-20	Dengue virus	Flavivirus	Flaviviridae	ssRNA(+)	10572	GenBank	partial	0	Cambodia	Cambodia	Homo sapiens	blood	2019-06	Dengue virus 2 isolate 100-0477_2019-06-20 polyprotein (POLY) gene, complete cds
OL414736.1	Bohl,J.A., Manning,J.E., Lay,S., Chea,S., Brooks,C., Ahyong,V.	2021-11-14T00:00:00Z	109-0294_2020-06-17	Dengue virus	Flavivirus	Flaviviridae	ssRNA(+)	10600	GenBank	partial	0	Cambodia	Cambodia	Homo sapiens	blood	2020-06	Dengue virus type 2 isolate 109-0294_2020-06-17 polyprotein (POLY) gene, complete cds
OL414735.1	Bohl,J.A., Manning,J.E., Lay,S., Chea,S., Brooks,C., Ahyong,V.	2021-11-14T00:00:00Z	109-0295_2020-06-18	Dengue virus	Flavivirus	Flaviviridae	ssRNA(+)	10620	GenBank	partial	0	Cambodia	Cambodia	Homo sapiens	blood	2020-06	Dengue virus type 2 isolate 109-0295_2020-06-18 polyprotein (POLY) gene, complete cds
OL414734.1	Bohl,J.A., Manning,J.E., Lay,S., Chea,S., Brooks,C., Ahyong,V.	2021-11-14T00:00:00Z	109-0298_2020-06-30	Dengue virus	Flavivirus	Flaviviridae	ssRNA(+)	10568	GenBank	partial	0	Cambodia	Cambodia	Homo sapiens	blood	2020-06	Dengue virus type 2 isolate 109-0298_2020-06-30 polyprotein (POLY) gene, complete cds
OL414733.1	Bohl,J.A., Manning,J.E., Lay,S., Chea,S., Brooks,C., Ahyong,V.	2021-11-14T00:00:00Z	109-0350_2020-08-10	Dengue virus	Flavivirus	Flaviviridae	ssRNA(+)	10695	GenBank	partial	0	Cambodia	Cambodia	Homo sapiens	blood	2020-08	Dengue virus type 2 isolate 109-0350_2020-08-10 polyprotein (POLY) gene, complete cds
OL414732.1	Bohl,J.A., Manning,J.E., Lay,S., Chea,S., Brooks,C., Ahyong,V.	2021-11-14T00:00:00Z	109-0376_2020-08-28	Dengue virus	Flavivirus	Flaviviridae	ssRNA(+)	10642	GenBank	partial	0	Cambodia	Cambodia	Homo sapiens	blood	2020-08	Dengue virus type 2 isolate 109-0376_2020-08-28 polyprotein (POLY) gene, complete cds
OL414731.1	Bohl,J.A., Manning,J.E., Lay,S., Chea,S., Brooks,C., Ahyong,V.	2021-11-14T00:00:00Z	109-0389_2020-09-04	Dengue virus	Flavivirus	Flaviviridae	ssRNA(+)	10694	GenBank	partial	0	Cambodia	Cambodia	Homo sapiens	blood	2020-09	Dengue virus type 2 isolate 109-0389_2020-09-04 polyprotein (POLY) gene, complete cds
OL414730.1	Bohl,J.A., Manning,J.E., Lay,S., Chea,S., Brooks,C., Ahyong,V.	2021-11-14T00:00:00Z	109-0003_2019-07-24	Dengue virus	Flavivirus	Flaviviridae	ssRNA(+)	10687	GenBank	partial	0	Cambodia	Cambodia	Homo sapiens	blood	2019-07	Dengue virus type 2 isolate 109-0003_2019-07-24 polyprotein (POLY) gene, complete cds
OL414729.1	Bohl,J.A., Manning,J.E., Lay,S., Chea,S., Brooks,C., Ahyong,V.	2021-11-14T00:00:00Z	109-0019_2019-07-26	Dengue virus	Flavivirus	Flaviviridae	ssRNA(+)	10636	GenBank	partial	0	Cambodia	Cambodia	Homo sapiens	blood	2019-07	Dengue virus type 2 isolate 109-0019_2019-07-26 polyprotein (POLY) gene, complete cds
OL414728.1	Bohl,J.A., Manning,J.E., Lay,S., Chea,S., Brooks,C., Ahyong,V.	2021-11-14T00:00:00Z	109-0023_2019-07-29	Dengue virus	Flavivirus	Flaviviridae	ssRNA(+)	10713	GenBank	partial	0	Cambodia	Cambodia	Homo sapiens	blood	2019-07	Dengue virus type 2 isolate 109-0023_2019-07-29 polyprotein (POLY) gene, complete cds
OL414727.1	Bohl,J.A., Manning,J.E., Lay,S., Chea,S., Brooks,C., Ahyong,V.	2021-11-14T00:00:00Z	109-0049_2019-08-06	Dengue virus	Flavivirus	Flaviviridae	ssRNA(+)	10572	GenBank	partial	0	Cambodia	Cambodia	Homo sapiens	blood	2019-08	Dengue virus type 2 isolate 109-0049_2019-08-06 polyprotein (POLY) gene, complete cds
OL414726.1	Bohl,J.A., Manning,J.E., Lay,S., Chea,S., Brooks,C., Ahyong,V.	2021-11-14T00:00:00Z	109-0053_2019-08-07	Dengue virus	Flavivirus	Flaviviridae	ssRNA(+)	10572	GenBank	partial	0	Cambodia	Cambodia	Homo sapiens	blood	2019-08	Dengue virus type 2 isolate 109-0053_2019-08-07 polyprotein (POLY) gene, complete cds
OL414725.1	Bohl,J.A., Manning,J.E., Lay,S., Chea,S., Brooks,C., Ahyong,V.	2021-11-14T00:00:00Z	109-0059_2019-08-09	Dengue virus	Flavivirus	Flaviviridae	ssRNA(+)	10671	GenBank	partial	0	Cambodia	Cambodia	Homo sapiens	blood	2019-08	Dengue virus type 2 isolate 109-0059_2019-08-09 polyprotein (POLY) gene, complete cds
OL414724.1	Bohl,J.A., Manning,J.E., Lay,S., Chea,S., Brooks,C., Ahyong,V.	2021-11-14T00:00:00Z	109-0086_2019-08-21	Dengue virus	Flavivirus	Flaviviridae	ssRNA(+)	10572	GenBank	partial	0	Cambodia	Cambodia	Homo sapiens	blood	2019-08	Dengue virus type 2 isolate 109-0086_2019-08-21 polyprotein (POLY) gene, complete cds
OL414723.1	Bohl,J.A., Manning,J.E., Lay,S., Chea,S., Brooks,C., Ahyong,V.	2021-11-14T00:00:00Z	109-0087_2019-08-21	Dengue virus	Flavivirus	Flaviviridae	ssRNA(+)	10572	GenBank	partial	0	Cambodia	Cambodia	Homo sapiens	blood	2019-08	Dengue virus type 2 isolate 109-0087_2019-08-21 polyprotein (POLY) gene, complete cds
OL414722.1	Bohl,J.A., Manning,J.E., Lay,S., Chea,S., Brooks,C., Ahyong,V.	2021-11-14T00:00:00Z	109-0093_2019-08-22	Dengue virus	Flavivirus	Flaviviridae	ssRNA(+)	10572	GenBank	partial	0	Cambodia	Cambodia	Homo sapiens	blood	2019-08	Dengue virus type 2 isolate 109-0093_2019-08-22 polyprotein (POLY) gene, complete cds
OL414721.1	Bohl,J.A., Manning,J.E., Lay,S., Chea,S., Brooks,C., Ahyong,V.	2021-11-14T00:00:00Z	100-0067_2019-07-25	Dengue virus	Flavivirus	Flaviviridae	ssRNA(+)	10573	GenBank	partial	0	Cambodia	Cambodia	Homo sapiens	blood	2019-07	Dengue virus type 2 isolate 100-0067_2019-07-25 polyprotein (POLY) gene, complete cds
OL414720.1	Bohl,J.A., Manning,J.E., Lay,S., Chea,S., Brooks,C., Ahyong,V.	2021-11-14T00:00:00Z	100-0068_2019-07-25	Dengue virus	Flavivirus	Flaviviridae	ssRNA(+)	10573	GenBank	partial	0	Cambodia	Cambodia	Homo sapiens	blood	2019-07	Dengue virus type 2 isolate 100-0068_2019-07-25 polyprotein (POLY) gene, complete cds
OL414719.1	Bohl,J.A., Manning,J.E., Lay,S., Chea,S., Brooks,C., Ahyong,V.	2021-11-14T00:00:00Z	100-0156_2019-07-25	Dengue virus	Flavivirus	Flaviviridae	ssRNA(+)	10572	GenBank	partial	0	Cambodia	Cambodia	Homo sapiens	blood	2019-07	Dengue virus type 2 isolate 100-0156_2019-07-25 polyprotein (POLY) gene, complete cds
OL414718.1	Bohl,J.A., Manning,J.E., Lay,S., Chea,S., Brooks,C., Ahyong,V.	2021-11-14T00:00:00Z	100-0160_2019-07-29	Dengue virus	Flavivirus	Flaviviridae	ssRNA(+)	10572	GenBank	partial	0	Cambodia	Cambodia	Homo sapiens	blood	2019-07	Dengue virus type 2 isolate 100-0160_2019-07-29 polyprotein (POLY) gene, complete cds
OL414717.1	Bohl,J.A., Manning,J.E., Lay,S., Chea,S., Brooks,C., Ahyong,V.	2021-11-14T00:00:00Z	100-0430_2019-07-02	Dengue virus	Flavivirus	Flaviviridae	ssRNA(+)	10689	GenBank	partial	0	Cambodia	Cambodia	Homo sapiens	blood	2019-07	Dengue virus type 2 isolate 100-0430_2019-07-02 polyprotein (POLY) gene, complete cds
OL412740.1	Bohl,J.A., Manning,J.E., Lay,S., Chea,S., Brooks,C., Ahyong,V.	2021-11-13T00:00:00Z	100-0670_2019-07-30	Dengue virus	Flavivirus	Flaviviridae	ssRNA(+)	10697	GenBank	partial	Cosmopolitan	Cambodia	Cambodia	Homo sapiens	blood	2019-07	Dengue virus type 2 isolate 100-0670_2019-07-30 polyprotein (POLY) gene, complete cds
OL321186.1	Jonduo,M., Neave,M.J., Javati,S., Abala,D., Bilo,E., Kini,A., Kumbu,J., Laman,M., Robinson,L.J., Makita,L., Susapu,M., Pomat,W., Abdad,M.Y., Williams,D.T., Horwood,P.F., Robinson,L., Williams,D.	2022-08-01T00:00:00Z	NCD060	Dengue virus	Flavivirus	Flaviviridae	ssRNA(+)	10165	GenBank	partial	0	Papua New Guinea: NCD, Hohola	Papua New Guinea	Homo sapiens	blood	2016-04-12	Dengue virus 2 isolate NCD060 polyprotein (POLY) gene, partial cds
OL321185.1	Jonduo,M., Neave,M.J., Javati,S., Abala,D., Bilo,E., Kini,A., Kumbu,J., Laman,M., Robinson,L.J., Makita,L., Susapu,M., Pomat,W., Abdad,M.Y., Williams,D.T., Horwood,P.F., Robinson,L., Williams,D.	2022-08-01T00:00:00Z	NCD043	Dengue virus	Flavivirus	Flaviviridae	ssRNA(+)	10431	GenBank	partial	0	Papua New Guinea: NCD	Papua New Guinea	Homo sapiens	blood	2016	Dengue virus 2 isolate NCD043 polyprotein (POLY) gene, partial cds
OL321184.1	Jonduo,M., Neave,M.J., Javati,S., Abala,D., Bilo,E., Kini,A., Kumbu,J., Laman,M., Robinson,L.J., Makita,L., Susapu,M., Pomat,W., Abdad,M.Y., Williams,D.T., Horwood,P.F., Robinson,L., Williams,D.	2022-08-01T00:00:00Z	POM069	Dengue virus	Flavivirus	Flaviviridae	ssRNA(+)	10472	GenBank	partial	0	Papua New Guinea: NCD	Papua New Guinea	Homo sapiens	blood	2016-05-10	Dengue virus 2 isolate POM069 polyprotein (POLY) gene, complete cds
OL321183.1	Jonduo,M., Neave,M.J., Javati,S., Abala,D., Bilo,E., Kini,A., Kumbu,J., Laman,M., Robinson,L.J., Makita,L., Susapu,M., Pomat,W., Abdad,M.Y., Williams,D.T., Horwood,P.F., Robinson,L., Williams,D.	2022-08-01T00:00:00Z	NCD009	Dengue virus	Flavivirus	Flaviviridae	ssRNA(+)	10515	GenBank	partial	0	Papua New Guinea: NCD, June Valley	Papua New Guinea	Homo sapiens	blood	2016-03-12	Dengue virus 2 isolate NCD009 polyprotein (POLY) gene, complete cds
OL321182.1	Jonduo,M., Neave,M.J., Javati,S., Abala,D., Bilo,E., Kini,A., Kumbu,J., Laman,M., Robinson,L.J., Makita,L., Susapu,M., Pomat,W., Abdad,M.Y., Williams,D.T., Horwood,P.F., Robinson,L., Williams,D.	2022-08-01T00:00:00Z	NCD015	Dengue virus	Flavivirus	Flaviviridae	ssRNA(+)	10635	GenBank	partial	0	Papua New Guinea: NCD, Hohola	Papua New Guinea	Homo sapiens	blood	2016-03-05	Dengue virus 2 isolate NCD015 polyprotein (POLY) gene, complete cds
OL321178.1	Jonduo,M., Neave,M.J., Javati,S., Abala,D., Bilo,E., Kini,A., Kumbu,J., Laman,M., Robinson,L.J., Makita,L., Susapu,M., Pomat,W., Abdad,M.Y., Williams,D.T., Horwood,P.F., Robinson,L., Williams,D.	2022-08-01T00:00:00Z	DAR026	Dengue virus	Flavivirus	Flaviviridae	ssRNA(+)	10317	GenBank	partial	0	Papua New Guinea: Daru	Papua New Guinea	Homo sapiens	blood	2016-03-07	Dengue virus 2 isolate DAR026 polyprotein (POLY) gene, partial cds
OL321177.1	Jonduo,M., Neave,M.J., Javati,S., Abala,D., Bilo,E., Kini,A., Kumbu,J., Laman,M., Robinson,L.J., Makita,L., Susapu,M., Pomat,W., Abdad,M.Y., Williams,D.T., Horwood,P.F., Robinson,L., Williams,D.	2022-08-01T00:00:00Z	NCD050	Dengue virus	Flavivirus	Flaviviridae	ssRNA(+)	10454	GenBank	partial	0	Papua New Guinea: NCD	Papua New Guinea	Homo sapiens	blood	2016	Dengue virus 2 isolate NCD050 polyprotein (POLY) gene, partial cds
OL321176.1	Jonduo,M., Neave,M.J., Javati,S., Abala,D., Bilo,E., Kini,A., Kumbu,J., Laman,M., Robinson,L.J., Makita,L., Susapu,M., Pomat,W., Abdad,M.Y., Williams,D.T., Horwood,P.F., Robinson,L., Williams,D.	2022-08-01T00:00:00Z	NCD049	Dengue virus	Flavivirus	Flaviviridae	ssRNA(+)	10523	GenBank	partial	0	Papua New Guinea: NCD	Papua New Guinea	Homo sapiens	blood	2016	Dengue virus 2 isolate NCD049 polyprotein (POLY) gene, complete cds
OK605761.1	Tamura,T., Zhang,J., Madan,V., Biswas,A., Schwoerer,M.P., Cafiero,T.R., Heller,B.L., Wang,W., Ploss,A.	2022-01-04T00:00:00Z	DENV2-5_SP194589	Dengue virus	Flavivirus	Flaviviridae	ssRNA(+)	10723	GenBank	complete	0	Brazil	Brazil	Homo sapiens	blood	2000	Dengue virus type 2 isolate DENV2-5_SP194589, complete genome
OK605760.1	Tamura,T., Zhang,J., Madan,V., Biswas,A., Schwoerer,M.P., Cafiero,T.R., Heller,B.L., Wang,W., Ploss,A.	2022-01-04T00:00:00Z	DENV2-4_PH_H023-88	Dengue virus	Flavivirus	Flaviviridae	ssRNA(+)	10722	GenBank	complete	0	Philippines	Philippines	Homo sapiens	blood	1988	Dengue virus type 2 isolate DENV2-4_PH_H023-88, complete genome
OK605759.1	Tamura,T., Zhang,J., Madan,V., Biswas,A., Schwoerer,M.P., Cafiero,T.R., Heller,B.L., Wang,W., Ploss,A.	2022-01-04T00:00:00Z	DENV2-3_K_0006-94	Dengue virus	Flavivirus	Flaviviridae	ssRNA(+)	10724	GenBank	complete	0	Thailand	Thailand	Homo sapiens	blood	1994	Dengue virus type 2 isolate DENV2-3_K_0006-94, complete genome
OK605758.1	Tamura,T., Zhang,J., Madan,V., Biswas,A., Schwoerer,M.P., Cafiero,T.R., Heller,B.L., Wang,W., Ploss,A.	2022-01-04T00:00:00Z	DENV2-2_INS_378816	Dengue virus	Flavivirus	Flaviviridae	ssRNA(+)	10723	GenBank	complete	0	Colombia	Colombia	Homo sapiens	blood	1998	Dengue virus type 2 isolate DENV2-2_INS_378816, complete genome
OK605757.1	Tamura,T., Zhang,J., Madan,V., Biswas,A., Schwoerer,M.P., Cafiero,T.R., Heller,B.L., Wang,W., Ploss,A.	2022-01-04T00:00:00Z	DENV2-1_DAK_HD_76395	Dengue virus	Flavivirus	Flaviviridae	ssRNA(+)	10724	GenBank	complete	0	Senegal	Senegal	Homo sapiens	blood	1990	Dengue virus type 2 isolate DENV2-1_DAK_HD_76395, complete genome
OK559627.1	Chen,Y.	2021-10-25T00:00:00Z	guangzhou2019-4	Dengue virus	Flavivirus	Flaviviridae	ssRNA(+)	10714	GenBank	partial	0	China	China	Homo sapiens	blood	2019-09-26	Dengue virus type 2 isolate guangzhou2019-4 polyprotein (POLY) gene, complete cds
OK469352.1	Stica,C., Barrero,R.A., Murray,R.Z., Devine,G.J., Phillips,M.J., Frentiu,F.D.	2022-02-28T00:00:00Z	8546/93 DEN2	Dengue virus	Flavivirus	Flaviviridae	ssRNA(+)	10678	GenBank	partial	2	Singapore	Singapore	Homo sapiens	blood	1993	Dengue virus 2 isolate 8546/93 DEN2 polyprotein (POLY) gene, complete cds
OK469351.1	Stica,C., Barrero,R.A., Murray,R.Z., Devine,G.J., Phillips,M.J., Frentiu,F.D.	2022-02-28T00:00:00Z	22942 WMH 1995 DENV 2	Dengue virus	Flavivirus	Flaviviridae	ssRNA(+)	10676	GenBank	partial	2	Myanmar	Myanmar	Homo sapiens	blood	1995	Dengue virus 2 isolate 22942 WMH 1995 DENV 2 polyprotein (POLY) gene, complete cds
OK469350.1	Stica,C., Barrero,R.A., Murray,R.Z., Devine,G.J., Phillips,M.J., Frentiu,F.D.	2022-02-28T00:00:00Z	DEN 3 D90-1002 3/00	Dengue virus	Flavivirus	Flaviviridae	ssRNA(+)	10676	GenBank	partial	2	Thailand	Thailand	Homo sapiens	blood	1990	Dengue virus 2 isolate DEN 3 D90-1002 3/00 polyprotein (POLY) gene, complete cds
OK469349.1	Stica,C., Barrero,R.A., Murray,R.Z., Devine,G.J., Phillips,M.J., Frentiu,F.D.	2022-02-28T00:00:00Z	Dengue 2 S-5279 Samoa1972	Dengue virus	Flavivirus	Flaviviridae	ssRNA(+)	10591	GenBank	partial	2	Samoa	Samoa	Homo sapiens	blood	1972	Dengue virus 2 isolate Dengue 2 S-5279 Samoa1972 polyprotein (POLY) gene, complete cds
OK469348.1	Stica,C., Barrero,R.A., Murray,R.Z., Devine,G.J., Phillips,M.J., Frentiu,F.D.	2022-02-28T00:00:00Z	Dengue 2 S-40921 Burma 1976	Dengue virus	Flavivirus	Flaviviridae	ssRNA(+)	10558	GenBank	partial	2	Myanmar	Myanmar	Homo sapiens	blood	1976	Dengue virus 2 isolate Dengue 2 S-40921 Burma 1976 polyprotein (POLY) gene, complete cds
OK469347.1	Stica,C., Barrero,R.A., Murray,R.Z., Devine,G.J., Phillips,M.J., Frentiu,F.D.	2022-02-28T00:00:00Z	Dengue 2 239127 Palau 1988	Dengue virus	Flavivirus	Flaviviridae	ssRNA(+)	10680	GenBank	partial	2	Palau	Palau	Homo sapiens	blood	1988	Dengue virus 2 isolate Dengue 2 239127 Palau 1988 polyprotein (POLY) gene, complete cds
OK469346.1	Stica,C., Barrero,R.A., Murray,R.Z., Devine,G.J., Phillips,M.J., Frentiu,F.D.	2022-02-28T00:00:00Z	DENV 2 Jamaica B78779	Dengue virus	Flavivirus	Flaviviridae	ssRNA(+)	10680	GenBank	partial	2	Jamaica	Jamaica	Homo sapiens	blood	1981	Dengue virus 2 isolate DENV 2 Jamaica B78779 polyprotein (POLY) gene, complete cds
OK469345.1	Stica,C., Barrero,R.A., Murray,R.Z., Devine,G.J., Phillips,M.J., Frentiu,F.D.	2022-02-28T00:00:00Z	55765 DENV 2	Dengue virus	Flavivirus	Flaviviridae	ssRNA(+)	10680	GenBank	partial	2	Myanmar	Myanmar	Homo sapiens	blood	1985	Dengue virus 2 isolate 55765 DENV 2 polyprotein (POLY) gene, complete cds
MZ945535.1	Santiago,G.A., Gonzalez-Morales,G., Flores,B., Charriez,K.N., Munoz-Jordan,J.L., Broussard,K.	2021-09-01T00:00:00Z	US/DB279/2020	Dengue virus	Flavivirus	Flaviviridae	ssRNA(+)	10241	GenBank	partial	0	USA: Texas	USA	Homo sapiens	blood	2020-10-08	Dengue virus type 2 isolate US/DB279/2020 polyprotein (POLY) gene, complete cds
MZ945534.1	Santiago,G.A., Gonzalez-Morales,G., Flores,B., Charriez,K.N., Munoz-Jordan,J.L., Broussard,K.	2021-09-01T00:00:00Z	US/DB278/2020	Dengue virus	Flavivirus	Flaviviridae	ssRNA(+)	10225	GenBank	partial	0	USA: Texas	USA	Homo sapiens	blood	2020-10-13	Dengue virus type 2 isolate US/DB278/2020 polyprotein (POLY) gene, partial cds
MZ945533.1	Santiago,G.A., Gonzalez-Morales,G., Flores,B., Charriez,K.N., Munoz-Jordan,J.L., Broussard,K.	2021-09-01T00:00:00Z	US/DB277/2020	Dengue virus	Flavivirus	Flaviviridae	ssRNA(+)	10225	GenBank	partial	0	USA: Texas	USA	Homo sapiens	blood	2020-10-28	Dengue virus type 2 isolate US/DB277/2020 polyprotein (POLY) gene, partial cds
MZ945532.1	Santiago,G.A., Gonzalez-Morales,G., Flores,B., Charriez,K.N., Munoz-Jordan,J.L., Broussard,K.	2021-09-01T00:00:00Z	US/DB276/2020	Dengue virus	Flavivirus	Flaviviridae	ssRNA(+)	10225	GenBank	partial	0	USA: Texas	USA	Homo sapiens	blood	2020-10-28	Dengue virus type 2 isolate US/DB276/2020 polyprotein (POLY) gene, partial cds
MZ945531.1	Santiago,G.A., Gonzalez-Morales,G., Flores,B., Charriez,K.N., Munoz-Jordan,J.L., Broussard,K.	2021-09-01T00:00:00Z	US/DB275/2020	Dengue virus	Flavivirus	Flaviviridae	ssRNA(+)	10224	GenBank	partial	0	USA: Texas	USA	Homo sapiens	blood	2020-11-01	Dengue virus type 2 isolate US/DB275/2020 polyprotein (POLY) gene, partial cds
MZ857222.1	Alfsnes,K., Eldholm,V., Gaunt,M.W., de Lamballerie,X., Gould,E.A., Pettersson,J.H., Gaunt,M., Gould,E.	2021-11-18T00:00:00Z	KAJP25_DENV2_Djibouti_Eastern.Africa_2007	Dengue virus	Flavivirus	Flaviviridae	ssRNA(+)	10173	GenBank	partial	0	Djibouti	Djibouti	Homo sapiens	blood	2007	Dengue virus 2 isolate KAJP25_DENV2_Djibouti_Eastern.Africa_2007 polyprotein (POLY) gene, complete cds
MZ857221.1	Alfsnes,K., Eldholm,V., Gaunt,M.W., de Lamballerie,X., Gould,E.A., Pettersson,J.H., Gaunt,M., Gould,E.	2021-11-18T00:00:00Z	KAJP24_DENV2_Uganda_Eastern.Africa_2017	Dengue virus	Flavivirus	Flaviviridae	ssRNA(+)	10173	GenBank	partial	0	Uganda	Uganda	Homo sapiens	blood	2017	Dengue virus 2 isolate KAJP24_DENV2_Uganda_Eastern.Africa_2017 polyprotein (POLY) gene, complete cds
MZ857220.1	Alfsnes,K., Eldholm,V., Gaunt,M.W., de Lamballerie,X., Gould,E.A., Pettersson,J.H., Gaunt,M., Gould,E.	2021-11-18T00:00:00Z	KAJP23_DENV2_Burkina.Faso_Western.Africa_2017	Dengue virus	Flavivirus	Flaviviridae	ssRNA(+)	10173	GenBank	partial	0	Burkina Faso	Burkina Faso	Homo sapiens	blood	2017	Dengue virus 2 isolate KAJP23_DENV2_Burkina.Faso_Western.Africa_2017 polyprotein (POLY) gene, complete cds
MZ857219.1	Alfsnes,K., Eldholm,V., Gaunt,M.W., de Lamballerie,X., Gould,E.A., Pettersson,J.H., Gaunt,M., Gould,E.	2021-11-18T00:00:00Z	KAJP22_DENV2_Somalia_Eastern.Africa_1996	Dengue virus	Flavivirus	Flaviviridae	ssRNA(+)	10173	GenBank	partial	0	Somalia	Somalia	Homo sapiens	blood	1996	Dengue virus 2 isolate KAJP22_DENV2_Somalia_Eastern.Africa_1996 polyprotein (POLY) gene, complete cds
MZ857218.1	Alfsnes,K., Eldholm,V., Gaunt,M.W., de Lamballerie,X., Gould,E.A., Pettersson,J.H., Gaunt,M., Gould,E.	2021-11-18T00:00:00Z	KAJP21_DENV2_Eritrea_Eastern.Africa_2017	Dengue virus	Flavivirus	Flaviviridae	ssRNA(+)	10173	GenBank	partial	0	Eritrea	Eritrea	Homo sapiens	blood	2017	Dengue virus 2 isolate KAJP21_DENV2_Eritrea_Eastern.Africa_2017 polyprotein (POLY) gene, complete cds
MZ857215.1	Alfsnes,K., Eldholm,V., Gaunt,M.W., de Lamballerie,X., Gould,E.A., Pettersson,J.H., Gaunt,M., Gould,E.	2021-11-18T00:00:00Z	KAJP16_DENV2_Somalia_Eastern.Africa_2015	Dengue virus	Flavivirus	Flaviviridae	ssRNA(+)	10173	GenBank	partial	0	Somalia	Somalia	Homo sapiens	blood	2015	Dengue virus 2 isolate KAJP16_DENV2_Somalia_Eastern.Africa_2015 polyprotein (POLY) gene, complete cds
MZ857214.1	Alfsnes,K., Eldholm,V., Gaunt,M.W., de Lamballerie,X., Gould,E.A., Pettersson,J.H., Gaunt,M., Gould,E.	2021-11-18T00:00:00Z	KAJP15_DENV2_Tanzania_Eastern.Africa_2014	Dengue virus	Flavivirus	Flaviviridae	ssRNA(+)	10173	GenBank	partial	0	Tanzania	Tanzania	Homo sapiens	blood	2014	Dengue virus 2 isolate KAJP15_DENV2_Tanzania_Eastern.Africa_2014 polyprotein (POLY) gene, complete cds
MZ857213.1	Alfsnes,K., Eldholm,V., Gaunt,M.W., de Lamballerie,X., Gould,E.A., Pettersson,J.H., Gaunt,M., Gould,E.	2021-11-18T00:00:00Z	KAJP14_DENV2_Tanzania_Eastern.Africa_2014-06	Dengue virus	Flavivirus	Flaviviridae	ssRNA(+)	10173	GenBank	partial	0	Tanzania	Tanzania	Homo sapiens	blood	2014-06	Dengue virus 2 isolate KAJP14_DENV2_Tanzania_Eastern.Africa_2014-06 polyprotein (POLY) gene, complete cds
MZ857212.1	Alfsnes,K., Eldholm,V., Gaunt,M.W., de Lamballerie,X., Gould,E.A., Pettersson,J.H., Gaunt,M., Gould,E.	2021-11-18T00:00:00Z	KAJP13_DENV2_Tanzania_Eastern.Africa_2014	Dengue virus	Flavivirus	Flaviviridae	ssRNA(+)	10173	GenBank	partial	0	Tanzania	Tanzania	Homo sapiens	blood	2014	Dengue virus 2 isolate KAJP13_DENV2_Tanzania_Eastern.Africa_2014 polyprotein (POLY) gene, complete cds
MZ857211.1	Alfsnes,K., Eldholm,V., Gaunt,M.W., de Lamballerie,X., Gould,E.A., Pettersson,J.H., Gaunt,M., Gould,E.	2021-11-18T00:00:00Z	KAJP12_DENV2_Mocambique_Eastern.Africa_2014	Dengue virus	Flavivirus	Flaviviridae	ssRNA(+)	10173	GenBank	partial	0	Mozambique	Mozambique	Homo sapiens	blood	2014	Dengue virus 2 isolate KAJP12_DENV2_Mocambique_Eastern.Africa_2014 polyprotein (POLY) gene, complete cds
MZ857210.1	Alfsnes,K., Eldholm,V., Gaunt,M.W., de Lamballerie,X., Gould,E.A., Pettersson,J.H., Gaunt,M., Gould,E.	2021-11-18T00:00:00Z	KAJP11_DENV2_Tanzania_Eastern.Africa_2014	Dengue virus	Flavivirus	Flaviviridae	ssRNA(+)	10173	GenBank	partial	0	Tanzania	Tanzania	Homo sapiens	blood	2014	Dengue virus 2 isolate KAJP11_DENV2_Tanzania_Eastern.Africa_2014 polyprotein (POLY) gene, complete cds
MZ857209.1	Alfsnes,K., Eldholm,V., Gaunt,M.W., de Lamballerie,X., Gould,E.A., Pettersson,J.H., Gaunt,M., Gould,E.	2021-11-18T00:00:00Z	KAJP10_DENV2_Kenya_Eastern.Africa_2013	Dengue virus	Flavivirus	Flaviviridae	ssRNA(+)	10173	GenBank	partial	0	Kenya	Kenya	Homo sapiens	blood	2013	Dengue virus 2 isolate KAJP10_DENV2_Kenya_Eastern.Africa_2013 polyprotein (POLY) gene, complete cds
MZ857208.1	Alfsnes,K., Eldholm,V., Gaunt,M.W., de Lamballerie,X., Gould,E.A., Pettersson,J.H., Gaunt,M., Gould,E.	2021-11-18T00:00:00Z	KAJP9_DENV2_Kenya_Eastern.Africa_2013	Dengue virus	Flavivirus	Flaviviridae	ssRNA(+)	10173	GenBank	partial	0	Kenya	Kenya	Homo sapiens	blood	2013	Dengue virus 2 isolate KAJP9_DENV2_Kenya_Eastern.Africa_2013 polyprotein (POLY) gene, complete cds
MZ773408.1	Cardona-Ospina,J.A., Rojas-Gallardo,D.M., Restrepo-Chica,J., Denham,J.D., Millan,N., Acosta,A., Castrillon-Spitia,J.D., Casas,W., Lagos-Grisales,G.J., Rodriguez-Morales,A.J., Galeano-Jaramillo,E., Tabares-Villa,F.A., Trujillo,A.M., Jimenez-Posada,E.V., Martinez-Gutierrez,M., Ruiz-Saenz,J., Waggoner,J., Collins,M.H., Piantadosi,A.	2021-08-17T00:00:00Z	AFI009	Dengue virus	Flavivirus	Flaviviridae	ssRNA(+)	10694	GenBank	partial	0	Colombia	Colombia	Homo sapiens	blood	2019-09	Dengue virus type 2 isolate AFI009 polyprotein (POLY) gene, complete cds
MZ636805.1	Poltep,K., Phadungsombat,J., Nakayama,E.E., Kosoltanapiwat,N., Hanboonkunupakarn,B., Wiriyarat,W., Shioda,T., Leaungwutiwong,P.	2021-10-08T00:00:00Z	DV2C-TM19-80	Dengue virus	Flavivirus	Flaviviridae	ssRNA(+)	10711	GenBank	partial	2	Thailand: Bangkok	Thailand	Homo sapiens	blood	2019-12-30	Dengue virus type 2 isolate DV2C-TM19-80 polyprotein (POLY) gene, complete cds
MZ636804.1	Poltep,K., Phadungsombat,J., Nakayama,E.E., Kosoltanapiwat,N., Hanboonkunupakarn,B., Wiriyarat,W., Shioda,T., Leaungwutiwong,P.	2021-10-08T00:00:00Z	DV2C-TM19-41	Dengue virus	Flavivirus	Flaviviridae	ssRNA(+)	10711	GenBank	partial	2	Thailand: Bangkok	Thailand	Homo sapiens	blood	2019-11-30	Dengue virus type 2 isolate DV2C-TM19-41 polyprotein (POLY) gene, complete cds
MZ636803.1	Poltep,K., Phadungsombat,J., Nakayama,E.E., Kosoltanapiwat,N., Hanboonkunupakarn,B., Wiriyarat,W., Shioda,T., Leaungwutiwong,P.	2021-10-08T00:00:00Z	DV2C-TM19-37	Dengue virus	Flavivirus	Flaviviridae	ssRNA(+)	10711	GenBank	partial	2	Thailand: Bangkok	Thailand	Homo sapiens	blood	2019-11-28	Dengue virus type 2 isolate DV2C-TM19-37 polyprotein (POLY) gene, complete cds
MZ636802.1	Poltep,K., Phadungsombat,J., Nakayama,E.E., Kosoltanapiwat,N., Hanboonkunupakarn,B., Wiriyarat,W., Shioda,T., Leaungwutiwong,P.	2021-10-08T00:00:00Z	DV2C-TM19-26	Dengue virus	Flavivirus	Flaviviridae	ssRNA(+)	10711	GenBank	partial	2	Thailand: Bangkok	Thailand	Homo sapiens	blood	2019-11-24	Dengue virus type 2 isolate DV2C-TM19-26 polyprotein (POLY) gene, complete cds
MZ636801.1	Poltep,K., Phadungsombat,J., Nakayama,E.E., Kosoltanapiwat,N., Hanboonkunupakarn,B., Wiriyarat,W., Shioda,T., Leaungwutiwong,P.	2021-10-08T00:00:00Z	DV2A-TM19-13	Dengue virus	Flavivirus	Flaviviridae	ssRNA(+)	10711	GenBank	partial	2	Thailand: Bangkok	Thailand	Homo sapiens	blood	2019-11-19	Dengue virus type 2 isolate DV2A-TM19-13 polyprotein (POLY) gene, complete cds
MZ453011.1	Sun,Q., Wang,X.	2021-12-31T00:00:00Z	SD 106	Dengue virus	Flavivirus	Flaviviridae	ssRNA(+)	10176	GenBank	partial	0	China	China	Homo sapiens	blood	2019	Dengue virus type 2 isolate SD 106 polyprotein (POLY) gene, complete cds
MZ453010.1	Sun,Q., Wang,X.	2021-12-31T00:00:00Z	SD92	Dengue virus	Flavivirus	Flaviviridae	ssRNA(+)	10176	GenBank	partial	0	China	China	Homo sapiens	blood	2019	Dengue virus type 2 isolate SD92 polyprotein (POLY) gene, complete cds
MZ453009.1	Sun,Q., Wang,X.	2021-12-31T00:00:00Z	SD9	Dengue virus	Flavivirus	Flaviviridae	ssRNA(+)	10176	GenBank	partial	0	China	China	Homo sapiens	blood	2019	Dengue virus type 2 isolate SD9 polyprotein (POLY) gene, complete cds
MZ453008.1	Sun,Q., Wang,X.	2021-12-31T00:00:00Z	DFF11	Dengue virus	Flavivirus	Flaviviridae	ssRNA(+)	10176	GenBank	partial	0	China	China	Homo sapiens	blood	2019	Dengue virus type 2 isolate DFF11 polyprotein (POLY) gene, complete cds
MZ453006.1	Sun,Q., Wang,X.	2021-12-31T00:00:00Z	DF11	Dengue virus	Flavivirus	Flaviviridae	ssRNA(+)	10176	GenBank	partial	0	China	China	Homo sapiens	blood	2019	Dengue virus type 2 isolate DF11 polyprotein (POLY) gene, complete cds
MZ312931.1	Jagtap,S., Pattabiraman,C., Sankaradoss,A., Pandit,A., Nisheetha,A., Krishna,S., Roy,R., Gadepalli,R.	2021-09-28T00:00:00Z	FT_AJ_34_S73_R3_DENV2_Cosmopolitan_India	Dengue virus	Flavivirus	Flaviviridae	ssRNA(+)	10591	GenBank	partial	Cosmopolitan	India	India	Homo sapiens	blood	2017-10-09	Dengue virus type 2 isolate FT_AJ_34_S73_R3_DENV2_Cosmopolitan_India polyprotein (POLY) gene, complete cds
MZ008467.1	Edgerton,S.V., Thongsripong,P., Wang,C., Montaya,M., Balmaseda,A., Harris,E., Bennett,S.N.	2021-04-28T00:00:00Z	D2/NI/5592_11A1/2015	Dengue virus	Flavivirus	Flaviviridae	ssRNA(+)	10724	GenBank	complete	0	Nicaragua	Nicaragua	Homo sapiens	blood	2015	Dengue virus type 2 isolate D2/NI/5592_11A1/2015, complete genome
MZ008466.1	Edgerton,S.V., Thongsripong,P., Wang,C., Montaya,M., Balmaseda,A., Harris,E., Bennett,S.N.	2021-04-28T00:00:00Z	D2/NI/2578_10a/2013	Dengue virus	Flavivirus	Flaviviridae	ssRNA(+)	10517	GenBank	partial	0	Nicaragua	Nicaragua	Homo sapiens	blood	2013	Dengue virus type 2 isolate D2/NI/2578_10a/2013 polyprotein (POLY) gene, complete cds
MZ008465.1	Edgerton,S.V., Thongsripong,P., Wang,C., Montaya,M., Balmaseda,A., Harris,E., Bennett,S.N.	2021-04-28T00:00:00Z	D2/NI/1949_1E/2015	Dengue virus	Flavivirus	Flaviviridae	ssRNA(+)	10588	GenBank	partial	0	Nicaragua	Nicaragua	Homo sapiens	blood	2015	Dengue virus type 2 isolate D2/NI/1949_1E/2015 polyprotein (POLY) gene, complete cds
MZ008464.1	Edgerton,S.V., Thongsripong,P., Wang,C., Montaya,M., Balmaseda,A., Harris,E., Bennett,S.N.	2021-04-28T00:00:00Z	D2/NI/1744_1E/2014	Dengue virus	Flavivirus	Flaviviridae	ssRNA(+)	10472	GenBank	partial	0	Nicaragua	Nicaragua	Homo sapiens	blood	2014	Dengue virus type 2 isolate D2/NI/1744_1E/2014 polyprotein (POLY) gene, complete cds
MZ008463.1	Edgerton,S.V., Thongsripong,P., Wang,C., Montaya,M., Balmaseda,A., Harris,E., Bennett,S.N.	2021-04-28T00:00:00Z	D2/NI/1670_1E/2013	Dengue virus	Flavivirus	Flaviviridae	ssRNA(+)	10725	GenBank	complete	0	Nicaragua	Nicaragua	Homo sapiens	blood	2013	Dengue virus type 2 isolate D2/NI/1670_1E/2013, complete genome
MZ008462.1	Edgerton,S.V., Thongsripong,P., Wang,C., Montaya,M., Balmaseda,A., Harris,E., Bennett,S.N.	2021-04-28T00:00:00Z	D2/NI/454_12A1/2015	Dengue virus	Flavivirus	Flaviviridae	ssRNA(+)	10664	GenBank	partial	0	Nicaragua	Nicaragua	Homo sapiens	blood	2015	Dengue virus type 2 isolate D2/NI/454_12A1/2015 polyprotein (POLY) gene, complete cds
MZ008461.1	Edgerton,S.V., Thongsripong,P., Wang,C., Montaya,M., Balmaseda,A., Harris,E., Bennett,S.N.	2021-04-28T00:00:00Z	D2/NI/1536_1E/2013	Dengue virus	Flavivirus	Flaviviridae	ssRNA(+)	10576	GenBank	partial	0	Nicaragua	Nicaragua	Homo sapiens	blood	2013	Dengue virus type 2 isolate D2/NI/1536_1E/2013 polyprotein (POLY) gene, complete cds
MZ008460.1	Edgerton,S.V., Thongsripong,P., Wang,C., Montaya,M., Balmaseda,A., Harris,E., Bennett,S.N.	2021-04-28T00:00:00Z	D2/NI/1567_1E/2013	Dengue virus	Flavivirus	Flaviviridae	ssRNA(+)	10632	GenBank	partial	0	Nicaragua	Nicaragua	Homo sapiens	blood	2013	Dengue virus type 2 isolate D2/NI/1567_1E/2013 polyprotein (POLY) gene, complete cds
MZ008459.1	Edgerton,S.V., Thongsripong,P., Wang,C., Montaya,M., Balmaseda,A., Harris,E., Bennett,S.N.	2021-04-28T00:00:00Z	D2/NI/1568_1E/2013	Dengue virus	Flavivirus	Flaviviridae	ssRNA(+)	10631	GenBank	partial	0	Nicaragua	Nicaragua	Homo sapiens	blood	2013	Dengue virus type 2 isolate D2/NI/1568_1E/2013 polyprotein (POLY) gene, complete cds
MZ008458.1	Edgerton,S.V., Thongsripong,P., Wang,C., Montaya,M., Balmaseda,A., Harris,E., Bennett,S.N.	2021-04-28T00:00:00Z	D2/NI/1950_1d/2015	Dengue virus	Flavivirus	Flaviviridae	ssRNA(+)	10590	GenBank	partial	0	Nicaragua	Nicaragua	Homo sapiens	blood	2015	Dengue virus type 2 isolate D2/NI/1950_1d/2015 polyprotein (POLY) gene, complete cds
MZ008457.1	Edgerton,S.V., Thongsripong,P., Wang,C., Montaya,M., Balmaseda,A., Harris,E., Bennett,S.N.	2021-04-28T00:00:00Z	D2/NI/1991_1e/2015	Dengue virus	Flavivirus	Flaviviridae	ssRNA(+)	10659	GenBank	partial	0	Nicaragua	Nicaragua	Homo sapiens	blood	2015	Dengue virus type 2 isolate D2/NI/1991_1e/2015 polyprotein (POLY) gene, complete cds
MZ008456.1	Edgerton,S.V., Thongsripong,P., Wang,C., Montaya,M., Balmaseda,A., Harris,E., Bennett,S.N.	2021-04-28T00:00:00Z	D2/NI/5262_12B1/2016	Dengue virus	Flavivirus	Flaviviridae	ssRNA(+)	10638	GenBank	partial	0	Nicaragua	Nicaragua	Homo sapiens	blood	2016	Dengue virus type 2 isolate D2/NI/5262_12B1/2016 polyprotein (POLY) gene, complete cds
MZ008455.1	Edgerton,S.V., Thongsripong,P., Wang,C., Montaya,M., Balmaseda,A., Harris,E., Bennett,S.N.	2021-04-28T00:00:00Z	D2/NI/8595_12B1/2016	Dengue virus	Flavivirus	Flaviviridae	ssRNA(+)	10633	GenBank	partial	0	Nicaragua	Nicaragua	Homo sapiens	blood	2016	Dengue virus type 2 isolate D2/NI/8595_12B1/2016 polyprotein (POLY) gene, complete cds
MZ008454.1	Edgerton,S.V., Thongsripong,P., Wang,C., Montaya,M., Balmaseda,A., Harris,E., Bennett,S.N.	2021-04-28T00:00:00Z	D2/NI/8971_12A1/2016	Dengue virus	Flavivirus	Flaviviridae	ssRNA(+)	10633	GenBank	partial	0	Nicaragua	Nicaragua	Homo sapiens	blood	2016	Dengue virus type 2 isolate D2/NI/8971_12A1/2016 polyprotein (POLY) gene, complete cds
MW946604.1	Katzelnick,L., Escoto,A., Huang,A., Garcia-Carreras,B., Chowdhury,N., Berry,I., Chavez,C., Rutvisuttinunt,W., Buchy,P., Duong,V., Dussart,P., Gromowski,G., Macareo,L., Smith,D., Jarman,R., Whitehead,S., Salje,H., Cummings,D., Lessler,J., Melendrez,M., Endy,T., Kalanarooj,S., A-Nuegoonpipat,A., Chanama,S., Sangkijporn,S., Klungthong,C., Thaisomboonsuk,B., Nisalak,A., Gibbons,R., Iamsirithaworn,S.,…	2021-04-23T00:00:00Z	00443/98	Dengue virus	Flavivirus	Flaviviridae	ssRNA(+)	10175	GenBank	partial	0	Thailand	Thailand	Homo sapiens	0	1998	Dengue virus type 2 isolate 00443/98 polyprotein (POLY) gene, partial cds
MW946603.1	Katzelnick,L., Escoto,A., Huang,A., Garcia-Carreras,B., Chowdhury,N., Berry,I., Chavez,C., Rutvisuttinunt,W., Buchy,P., Duong,V., Dussart,P., Gromowski,G., Macareo,L., Smith,D., Jarman,R., Whitehead,S., Salje,H., Cummings,D., Lessler,J., Melendrez,M., Endy,T., Kalanarooj,S., A-Nuegoonpipat,A., Chanama,S., Sangkijporn,S., Klungthong,C., Thaisomboonsuk,B., Nisalak,A., Gibbons,R., Iamsirithaworn,S.,…	2021-04-23T00:00:00Z	01465/05	Dengue virus	Flavivirus	Flaviviridae	ssRNA(+)	10175	GenBank	partial	0	Thailand	Thailand	Homo sapiens	0	2005	Dengue virus type 2 isolate 01465/05 polyprotein (POLY) gene, partial cds
MW946602.1	Katzelnick,L., Escoto,A., Huang,A., Garcia-Carreras,B., Chowdhury,N., Berry,I., Chavez,C., Rutvisuttinunt,W., Buchy,P., Duong,V., Dussart,P., Gromowski,G., Macareo,L., Smith,D., Jarman,R., Whitehead,S., Salje,H., Cummings,D., Lessler,J., Melendrez,M., Endy,T., Kalanarooj,S., A-Nuegoonpipat,A., Chanama,S., Sangkijporn,S., Klungthong,C., Thaisomboonsuk,B., Nisalak,A., Gibbons,R., Iamsirithaworn,S.,…	2021-04-23T00:00:00Z	00331/11	Dengue virus	Flavivirus	Flaviviridae	ssRNA(+)	10175	GenBank	partial	0	Thailand	Thailand	Homo sapiens	0	2011	Dengue virus type 2 isolate 00331/11 polyprotein (POLY) gene, partial cds
MW946601.1	Katzelnick,L., Escoto,A., Huang,A., Garcia-Carreras,B., Chowdhury,N., Berry,I., Chavez,C., Rutvisuttinunt,W., Buchy,P., Duong,V., Dussart,P., Gromowski,G., Macareo,L., Smith,D., Jarman,R., Whitehead,S., Salje,H., Cummings,D., Lessler,J., Melendrez,M., Endy,T., Kalanarooj,S., A-Nuegoonpipat,A., Chanama,S., Sangkijporn,S., Klungthong,C., Thaisomboonsuk,B., Nisalak,A., Gibbons,R., Iamsirithaworn,S.,…	2021-04-23T00:00:00Z	01298/11	Dengue virus	Flavivirus	Flaviviridae	ssRNA(+)	10175	GenBank	partial	0	Thailand	Thailand	Homo sapiens	0	2011	Dengue virus type 2 isolate 01298/11 polyprotein (POLY) gene, partial cds
MW946600.1	Katzelnick,L., Escoto,A., Huang,A., Garcia-Carreras,B., Chowdhury,N., Berry,I., Chavez,C., Rutvisuttinunt,W., Buchy,P., Duong,V., Dussart,P., Gromowski,G., Macareo,L., Smith,D., Jarman,R., Whitehead,S., Salje,H., Cummings,D., Lessler,J., Melendrez,M., Endy,T., Kalanarooj,S., A-Nuegoonpipat,A., Chanama,S., Sangkijporn,S., Klungthong,C., Thaisomboonsuk,B., Nisalak,A., Gibbons,R., Iamsirithaworn,S.,…	2021-04-23T00:00:00Z	01468/02	Dengue virus	Flavivirus	Flaviviridae	ssRNA(+)	10175	GenBank	partial	0	Thailand	Thailand	Homo sapiens	0	2002	Dengue virus type 2 isolate 01468/02 polyprotein (POLY) gene, partial cds
MW946599.1	Katzelnick,L., Escoto,A., Huang,A., Garcia-Carreras,B., Chowdhury,N., Berry,I., Chavez,C., Rutvisuttinunt,W., Buchy,P., Duong,V., Dussart,P., Gromowski,G., Macareo,L., Smith,D., Jarman,R., Whitehead,S., Salje,H., Cummings,D., Lessler,J., Melendrez,M., Endy,T., Kalanarooj,S., A-Nuegoonpipat,A., Chanama,S., Sangkijporn,S., Klungthong,C., Thaisomboonsuk,B., Nisalak,A., Gibbons,R., Iamsirithaworn,S.,…	2021-04-23T00:00:00Z	03658/99	Dengue virus	Flavivirus	Flaviviridae	ssRNA(+)	10175	GenBank	partial	0	Thailand	Thailand	Homo sapiens	0	1999	Dengue virus type 2 isolate 03658/99 polyprotein (POLY) gene, partial cds
MW946598.1	Katzelnick,L., Escoto,A., Huang,A., Garcia-Carreras,B., Chowdhury,N., Berry,I., Chavez,C., Rutvisuttinunt,W., Buchy,P., Duong,V., Dussart,P., Gromowski,G., Macareo,L., Smith,D., Jarman,R., Whitehead,S., Salje,H., Cummings,D., Lessler,J., Melendrez,M., Endy,T., Kalanarooj,S., A-Nuegoonpipat,A., Chanama,S., Sangkijporn,S., Klungthong,C., Thaisomboonsuk,B., Nisalak,A., Gibbons,R., Iamsirithaworn,S.,…	2021-04-23T00:00:00Z	03064/97	Dengue virus	Flavivirus	Flaviviridae	ssRNA(+)	10175	GenBank	partial	0	Thailand	Thailand	Homo sapiens	0	1997	Dengue virus type 2 isolate 03064/97 polyprotein (POLY) gene, partial cds
MW946597.1	Katzelnick,L., Escoto,A., Huang,A., Garcia-Carreras,B., Chowdhury,N., Berry,I., Chavez,C., Rutvisuttinunt,W., Buchy,P., Duong,V., Dussart,P., Gromowski,G., Macareo,L., Smith,D., Jarman,R., Whitehead,S., Salje,H., Cummings,D., Lessler,J., Melendrez,M., Endy,T., Kalanarooj,S., A-Nuegoonpipat,A., Chanama,S., Sangkijporn,S., Klungthong,C., Thaisomboonsuk,B., Nisalak,A., Gibbons,R., Iamsirithaworn,S.,…	2021-04-23T00:00:00Z	01836/07	Dengue virus	Flavivirus	Flaviviridae	ssRNA(+)	10175	GenBank	partial	0	Thailand	Thailand	Homo sapiens	0	2007	Dengue virus type 2 isolate 01836/07 polyprotein (POLY) gene, partial cds
MW946596.1	Katzelnick,L., Escoto,A., Huang,A., Garcia-Carreras,B., Chowdhury,N., Berry,I., Chavez,C., Rutvisuttinunt,W., Buchy,P., Duong,V., Dussart,P., Gromowski,G., Macareo,L., Smith,D., Jarman,R., Whitehead,S., Salje,H., Cummings,D., Lessler,J., Melendrez,M., Endy,T., Kalanarooj,S., A-Nuegoonpipat,A., Chanama,S., Sangkijporn,S., Klungthong,C., Thaisomboonsuk,B., Nisalak,A., Gibbons,R., Iamsirithaworn,S.,…	2021-04-23T00:00:00Z	03844/99	Dengue virus	Flavivirus	Flaviviridae	ssRNA(+)	10175	GenBank	partial	0	Thailand	Thailand	Homo sapiens	0	1999	Dengue virus type 2 isolate 03844/99 polyprotein (POLY) gene, partial cds
MW946595.1	Katzelnick,L., Escoto,A., Huang,A., Garcia-Carreras,B., Chowdhury,N., Berry,I., Chavez,C., Rutvisuttinunt,W., Buchy,P., Duong,V., Dussart,P., Gromowski,G., Macareo,L., Smith,D., Jarman,R., Whitehead,S., Salje,H., Cummings,D., Lessler,J., Melendrez,M., Endy,T., Kalanarooj,S., A-Nuegoonpipat,A., Chanama,S., Sangkijporn,S., Klungthong,C., Thaisomboonsuk,B., Nisalak,A., Gibbons,R., Iamsirithaworn,S.,…	2021-04-23T00:00:00Z	00420/05	Dengue virus	Flavivirus	Flaviviridae	ssRNA(+)	10175	GenBank	partial	0	Thailand	Thailand	Homo sapiens	0	2005	Dengue virus type 2 isolate 00420/05 polyprotein (POLY) gene, partial cds
MW946594.1	Katzelnick,L., Escoto,A., Huang,A., Garcia-Carreras,B., Chowdhury,N., Berry,I., Chavez,C., Rutvisuttinunt,W., Buchy,P., Duong,V., Dussart,P., Gromowski,G., Macareo,L., Smith,D., Jarman,R., Whitehead,S., Salje,H., Cummings,D., Lessler,J., Melendrez,M., Endy,T., Kalanarooj,S., A-Nuegoonpipat,A., Chanama,S., Sangkijporn,S., Klungthong,C., Thaisomboonsuk,B., Nisalak,A., Gibbons,R., Iamsirithaworn,S.,…	2021-04-23T00:00:00Z	05353/01	Dengue virus	Flavivirus	Flaviviridae	ssRNA(+)	10175	GenBank	partial	0	Thailand	Thailand	Homo sapiens	0	2001	Dengue virus type 2 isolate 05353/01 polyprotein (POLY) gene, partial cds
MW946593.1	Katzelnick,L., Escoto,A., Huang,A., Garcia-Carreras,B., Chowdhury,N., Berry,I., Chavez,C., Rutvisuttinunt,W., Buchy,P., Duong,V., Dussart,P., Gromowski,G., Macareo,L., Smith,D., Jarman,R., Whitehead,S., Salje,H., Cummings,D., Lessler,J., Melendrez,M., Endy,T., Kalanarooj,S., A-Nuegoonpipat,A., Chanama,S., Sangkijporn,S., Klungthong,C., Thaisomboonsuk,B., Nisalak,A., Gibbons,R., Iamsirithaworn,S.,…	2021-04-23T00:00:00Z	00777/95	Dengue virus	Flavivirus	Flaviviridae	ssRNA(+)	10175	GenBank	partial	0	Thailand	Thailand	Homo sapiens	0	1995	Dengue virus type 2 isolate 00777/95 polyprotein (POLY) gene, partial cds
MW946592.1	Katzelnick,L., Escoto,A., Huang,A., Garcia-Carreras,B., Chowdhury,N., Berry,I., Chavez,C., Rutvisuttinunt,W., Buchy,P., Duong,V., Dussart,P., Gromowski,G., Macareo,L., Smith,D., Jarman,R., Whitehead,S., Salje,H., Cummings,D., Lessler,J., Melendrez,M., Endy,T., Kalanarooj,S., A-Nuegoonpipat,A., Chanama,S., Sangkijporn,S., Klungthong,C., Thaisomboonsuk,B., Nisalak,A., Gibbons,R., Iamsirithaworn,S.,…	2021-04-23T00:00:00Z	02206/97	Dengue virus	Flavivirus	Flaviviridae	ssRNA(+)	10175	GenBank	partial	0	Thailand	Thailand	Homo sapiens	0	1997	Dengue virus type 2 isolate 02206/97 polyprotein (POLY) gene, partial cds
MW946591.1	Katzelnick,L., Escoto,A., Huang,A., Garcia-Carreras,B., Chowdhury,N., Berry,I., Chavez,C., Rutvisuttinunt,W., Buchy,P., Duong,V., Dussart,P., Gromowski,G., Macareo,L., Smith,D., Jarman,R., Whitehead,S., Salje,H., Cummings,D., Lessler,J., Melendrez,M., Endy,T., Kalanarooj,S., A-Nuegoonpipat,A., Chanama,S., Sangkijporn,S., Klungthong,C., Thaisomboonsuk,B., Nisalak,A., Gibbons,R., Iamsirithaworn,S.,…	2021-04-23T00:00:00Z	00233/95	Dengue virus	Flavivirus	Flaviviridae	ssRNA(+)	10175	GenBank	partial	0	Thailand	Thailand	Homo sapiens	0	1995	Dengue virus type 2 isolate 00233/95 polyprotein (POLY) gene, partial cds
MW946590.1	Katzelnick,L., Escoto,A., Huang,A., Garcia-Carreras,B., Chowdhury,N., Berry,I., Chavez,C., Rutvisuttinunt,W., Buchy,P., Duong,V., Dussart,P., Gromowski,G., Macareo,L., Smith,D., Jarman,R., Whitehead,S., Salje,H., Cummings,D., Lessler,J., Melendrez,M., Endy,T., Kalanarooj,S., A-Nuegoonpipat,A., Chanama,S., Sangkijporn,S., Klungthong,C., Thaisomboonsuk,B., Nisalak,A., Gibbons,R., Iamsirithaworn,S.,…	2021-04-23T00:00:00Z	07161/97	Dengue virus	Flavivirus	Flaviviridae	ssRNA(+)	10175	GenBank	partial	0	Thailand	Thailand	Homo sapiens	0	1997	Dengue virus type 2 isolate 07161/97 polyprotein (POLY) gene, partial cds
MW946589.1	Katzelnick,L., Escoto,A., Huang,A., Garcia-Carreras,B., Chowdhury,N., Berry,I., Chavez,C., Rutvisuttinunt,W., Buchy,P., Duong,V., Dussart,P., Gromowski,G., Macareo,L., Smith,D., Jarman,R., Whitehead,S., Salje,H., Cummings,D., Lessler,J., Melendrez,M., Endy,T., Kalanarooj,S., A-Nuegoonpipat,A., Chanama,S., Sangkijporn,S., Klungthong,C., Thaisomboonsuk,B., Nisalak,A., Gibbons,R., Iamsirithaworn,S.,…	2021-04-23T00:00:00Z	00078/13	Dengue virus	Flavivirus	Flaviviridae	ssRNA(+)	10175	GenBank	partial	0	Thailand	Thailand	Homo sapiens	0	2013	Dengue virus type 2 isolate 00078/13 polyprotein (POLY) gene, partial cds
MW946588.1	Katzelnick,L., Escoto,A., Huang,A., Garcia-Carreras,B., Chowdhury,N., Berry,I., Chavez,C., Rutvisuttinunt,W., Buchy,P., Duong,V., Dussart,P., Gromowski,G., Macareo,L., Smith,D., Jarman,R., Whitehead,S., Salje,H., Cummings,D., Lessler,J., Melendrez,M., Endy,T., Kalanarooj,S., A-Nuegoonpipat,A., Chanama,S., Sangkijporn,S., Klungthong,C., Thaisomboonsuk,B., Nisalak,A., Gibbons,R., Iamsirithaworn,S.,…	2021-04-23T00:00:00Z	00444/02	Dengue virus	Flavivirus	Flaviviridae	ssRNA(+)	10175	GenBank	partial	0	Thailand	Thailand	Homo sapiens	0	2002	Dengue virus type 2 isolate 00444/02 polyprotein (POLY) gene, partial cds
MW946587.1	Katzelnick,L., Escoto,A., Huang,A., Garcia-Carreras,B., Chowdhury,N., Berry,I., Chavez,C., Rutvisuttinunt,W., Buchy,P., Duong,V., Dussart,P., Gromowski,G., Macareo,L., Smith,D., Jarman,R., Whitehead,S., Salje,H., Cummings,D., Lessler,J., Melendrez,M., Endy,T., Kalanarooj,S., A-Nuegoonpipat,A., Chanama,S., Sangkijporn,S., Klungthong,C., Thaisomboonsuk,B., Nisalak,A., Gibbons,R., Iamsirithaworn,S.,…	2021-04-23T00:00:00Z	00903/05	Dengue virus	Flavivirus	Flaviviridae	ssRNA(+)	10175	GenBank	partial	0	Thailand	Thailand	Homo sapiens	0	2005	Dengue virus type 2 isolate 00903/05 polyprotein (POLY) gene, partial cds
MW946586.1	Katzelnick,L., Escoto,A., Huang,A., Garcia-Carreras,B., Chowdhury,N., Berry,I., Chavez,C., Rutvisuttinunt,W., Buchy,P., Duong,V., Dussart,P., Gromowski,G., Macareo,L., Smith,D., Jarman,R., Whitehead,S., Salje,H., Cummings,D., Lessler,J., Melendrez,M., Endy,T., Kalanarooj,S., A-Nuegoonpipat,A., Chanama,S., Sangkijporn,S., Klungthong,C., Thaisomboonsuk,B., Nisalak,A., Gibbons,R., Iamsirithaworn,S.,…	2021-04-23T00:00:00Z	02234/96	Dengue virus	Flavivirus	Flaviviridae	ssRNA(+)	10175	GenBank	partial	0	Thailand	Thailand	Homo sapiens	0	1996	Dengue virus type 2 isolate 02234/96 polyprotein (POLY) gene, partial cds
MW946585.1	Katzelnick,L., Escoto,A., Huang,A., Garcia-Carreras,B., Chowdhury,N., Berry,I., Chavez,C., Rutvisuttinunt,W., Buchy,P., Duong,V., Dussart,P., Gromowski,G., Macareo,L., Smith,D., Jarman,R., Whitehead,S., Salje,H., Cummings,D., Lessler,J., Melendrez,M., Endy,T., Kalanarooj,S., A-Nuegoonpipat,A., Chanama,S., Sangkijporn,S., Klungthong,C., Thaisomboonsuk,B., Nisalak,A., Gibbons,R., Iamsirithaworn,S.,…	2021-04-23T00:00:00Z	01454/11	Dengue virus	Flavivirus	Flaviviridae	ssRNA(+)	10175	GenBank	partial	0	Thailand	Thailand	Homo sapiens	0	2011	Dengue virus type 2 isolate 01454/11 polyprotein (POLY) gene, partial cds
MW946584.1	Katzelnick,L., Escoto,A., Huang,A., Garcia-Carreras,B., Chowdhury,N., Berry,I., Chavez,C., Rutvisuttinunt,W., Buchy,P., Duong,V., Dussart,P., Gromowski,G., Macareo,L., Smith,D., Jarman,R., Whitehead,S., Salje,H., Cummings,D., Lessler,J., Melendrez,M., Endy,T., Kalanarooj,S., A-Nuegoonpipat,A., Chanama,S., Sangkijporn,S., Klungthong,C., Thaisomboonsuk,B., Nisalak,A., Gibbons,R., Iamsirithaworn,S.,…	2021-04-23T00:00:00Z	02039/07	Dengue virus	Flavivirus	Flaviviridae	ssRNA(+)	10175	GenBank	partial	0	Thailand	Thailand	Homo sapiens	0	2007	Dengue virus type 2 isolate 02039/07 polyprotein (POLY) gene, partial cds
MW946583.1	Katzelnick,L., Escoto,A., Huang,A., Garcia-Carreras,B., Chowdhury,N., Berry,I., Chavez,C., Rutvisuttinunt,W., Buchy,P., Duong,V., Dussart,P., Gromowski,G., Macareo,L., Smith,D., Jarman,R., Whitehead,S., Salje,H., Cummings,D., Lessler,J., Melendrez,M., Endy,T., Kalanarooj,S., A-Nuegoonpipat,A., Chanama,S., Sangkijporn,S., Klungthong,C., Thaisomboonsuk,B., Nisalak,A., Gibbons,R., Iamsirithaworn,S.,…	2021-04-23T00:00:00Z	BR-161	Dengue virus	Flavivirus	Flaviviridae	ssRNA(+)	10176	GenBank	partial	0	Brazil	Brazil	Homo sapiens	0	2004	Dengue virus type 2 isolate BR-161 polyprotein (POLY) gene, complete cds
MW946582.1	Katzelnick,L., Escoto,A., Huang,A., Garcia-Carreras,B., Chowdhury,N., Berry,I., Chavez,C., Rutvisuttinunt,W., Buchy,P., Duong,V., Dussart,P., Gromowski,G., Macareo,L., Smith,D., Jarman,R., Whitehead,S., Salje,H., Cummings,D., Lessler,J., Melendrez,M., Endy,T., Kalanarooj,S., A-Nuegoonpipat,A., Chanama,S., Sangkijporn,S., Klungthong,C., Thaisomboonsuk,B., Nisalak,A., Gibbons,R., Iamsirithaworn,S.,…	2021-04-23T00:00:00Z	01667/00	Dengue virus	Flavivirus	Flaviviridae	ssRNA(+)	10175	GenBank	partial	0	Thailand	Thailand	Homo sapiens	0	2000	Dengue virus type 2 isolate 01667/00 polyprotein (POLY) gene, partial cds
MW946581.1	Katzelnick,L., Escoto,A., Huang,A., Garcia-Carreras,B., Chowdhury,N., Berry,I., Chavez,C., Rutvisuttinunt,W., Buchy,P., Duong,V., Dussart,P., Gromowski,G., Macareo,L., Smith,D., Jarman,R., Whitehead,S., Salje,H., Cummings,D., Lessler,J., Melendrez,M., Endy,T., Kalanarooj,S., A-Nuegoonpipat,A., Chanama,S., Sangkijporn,S., Klungthong,C., Thaisomboonsuk,B., Nisalak,A., Gibbons,R., Iamsirithaworn,S.,…	2021-04-23T00:00:00Z	00425/98	Dengue virus	Flavivirus	Flaviviridae	ssRNA(+)	10175	GenBank	partial	0	Thailand	Thailand	Homo sapiens	0	1998	Dengue virus type 2 isolate 00425/98 polyprotein (POLY) gene, partial cds
MW946580.1	Katzelnick,L., Escoto,A., Huang,A., Garcia-Carreras,B., Chowdhury,N., Berry,I., Chavez,C., Rutvisuttinunt,W., Buchy,P., Duong,V., Dussart,P., Gromowski,G., Macareo,L., Smith,D., Jarman,R., Whitehead,S., Salje,H., Cummings,D., Lessler,J., Melendrez,M., Endy,T., Kalanarooj,S., A-Nuegoonpipat,A., Chanama,S., Sangkijporn,S., Klungthong,C., Thaisomboonsuk,B., Nisalak,A., Gibbons,R., Iamsirithaworn,S.,…	2021-04-23T00:00:00Z	01177/04	Dengue virus	Flavivirus	Flaviviridae	ssRNA(+)	10175	GenBank	partial	0	Thailand	Thailand	Homo sapiens	0	2004	Dengue virus type 2 isolate 01177/04 polyprotein (POLY) gene, partial cds
MW946579.1	Katzelnick,L., Escoto,A., Huang,A., Garcia-Carreras,B., Chowdhury,N., Berry,I., Chavez,C., Rutvisuttinunt,W., Buchy,P., Duong,V., Dussart,P., Gromowski,G., Macareo,L., Smith,D., Jarman,R., Whitehead,S., Salje,H., Cummings,D., Lessler,J., Melendrez,M., Endy,T., Kalanarooj,S., A-Nuegoonpipat,A., Chanama,S., Sangkijporn,S., Klungthong,C., Thaisomboonsuk,B., Nisalak,A., Gibbons,R., Iamsirithaworn,S.,…	2021-04-23T00:00:00Z	03684/99	Dengue virus	Flavivirus	Flaviviridae	ssRNA(+)	10175	GenBank	partial	0	Thailand	Thailand	Homo sapiens	0	1999	Dengue virus type 2 isolate 03684/99 polyprotein (POLY) gene, partial cds
MW946578.1	Katzelnick,L., Escoto,A., Huang,A., Garcia-Carreras,B., Chowdhury,N., Berry,I., Chavez,C., Rutvisuttinunt,W., Buchy,P., Duong,V., Dussart,P., Gromowski,G., Macareo,L., Smith,D., Jarman,R., Whitehead,S., Salje,H., Cummings,D., Lessler,J., Melendrez,M., Endy,T., Kalanarooj,S., A-Nuegoonpipat,A., Chanama,S., Sangkijporn,S., Klungthong,C., Thaisomboonsuk,B., Nisalak,A., Gibbons,R., Iamsirithaworn,S.,…	2021-04-23T00:00:00Z	05885/01	Dengue virus	Flavivirus	Flaviviridae	ssRNA(+)	10175	GenBank	partial	0	Thailand	Thailand	Homo sapiens	0	2001	Dengue virus type 2 isolate 05885/01 polyprotein (POLY) gene, partial cds
MW946577.1	Katzelnick,L., Escoto,A., Huang,A., Garcia-Carreras,B., Chowdhury,N., Berry,I., Chavez,C., Rutvisuttinunt,W., Buchy,P., Duong,V., Dussart,P., Gromowski,G., Macareo,L., Smith,D., Jarman,R., Whitehead,S., Salje,H., Cummings,D., Lessler,J., Melendrez,M., Endy,T., Kalanarooj,S., A-Nuegoonpipat,A., Chanama,S., Sangkijporn,S., Klungthong,C., Thaisomboonsuk,B., Nisalak,A., Gibbons,R., Iamsirithaworn,S.,…	2021-04-23T00:00:00Z	00334/12	Dengue virus	Flavivirus	Flaviviridae	ssRNA(+)	10175	GenBank	partial	0	Thailand	Thailand	Homo sapiens	0	2012	Dengue virus type 2 isolate 00334/12 polyprotein (POLY) gene, partial cds
MW946576.1	Katzelnick,L., Escoto,A., Huang,A., Garcia-Carreras,B., Chowdhury,N., Berry,I., Chavez,C., Rutvisuttinunt,W., Buchy,P., Duong,V., Dussart,P., Gromowski,G., Macareo,L., Smith,D., Jarman,R., Whitehead,S., Salje,H., Cummings,D., Lessler,J., Melendrez,M., Endy,T., Kalanarooj,S., A-Nuegoonpipat,A., Chanama,S., Sangkijporn,S., Klungthong,C., Thaisomboonsuk,B., Nisalak,A., Gibbons,R., Iamsirithaworn,S.,…	2021-04-23T00:00:00Z	00058/13	Dengue virus	Flavivirus	Flaviviridae	ssRNA(+)	10175	GenBank	partial	0	Thailand	Thailand	Homo sapiens	0	2013	Dengue virus type 2 isolate 00058/13 polyprotein (POLY) gene, partial cds
MW946575.1	Katzelnick,L., Escoto,A., Huang,A., Garcia-Carreras,B., Chowdhury,N., Berry,I., Chavez,C., Rutvisuttinunt,W., Buchy,P., Duong,V., Dussart,P., Gromowski,G., Macareo,L., Smith,D., Jarman,R., Whitehead,S., Salje,H., Cummings,D., Lessler,J., Melendrez,M., Endy,T., Kalanarooj,S., A-Nuegoonpipat,A., Chanama,S., Sangkijporn,S., Klungthong,C., Thaisomboonsuk,B., Nisalak,A., Gibbons,R., Iamsirithaworn,S.,…	2021-04-23T00:00:00Z	IQT2913	Dengue virus	Flavivirus	Flaviviridae	ssRNA(+)	10176	GenBank	partial	0	Peru	Peru	Homo sapiens	0	1996	Dengue virus type 2 isolate IQT2913 polyprotein (POLY) gene, complete cds
MW946574.1	Katzelnick,L., Escoto,A., Huang,A., Garcia-Carreras,B., Chowdhury,N., Berry,I., Chavez,C., Rutvisuttinunt,W., Buchy,P., Duong,V., Dussart,P., Gromowski,G., Macareo,L., Smith,D., Jarman,R., Whitehead,S., Salje,H., Cummings,D., Lessler,J., Melendrez,M., Endy,T., Kalanarooj,S., A-Nuegoonpipat,A., Chanama,S., Sangkijporn,S., Klungthong,C., Thaisomboonsuk,B., Nisalak,A., Gibbons,R., Iamsirithaworn,S.,…	2021-04-23T00:00:00Z	00135/01	Dengue virus	Flavivirus	Flaviviridae	ssRNA(+)	10175	GenBank	partial	0	Thailand	Thailand	Homo sapiens	0	2001	Dengue virus type 2 isolate 00135/01 polyprotein (POLY) gene, partial cds
MW946573.1	Katzelnick,L., Escoto,A., Huang,A., Garcia-Carreras,B., Chowdhury,N., Berry,I., Chavez,C., Rutvisuttinunt,W., Buchy,P., Duong,V., Dussart,P., Gromowski,G., Macareo,L., Smith,D., Jarman,R., Whitehead,S., Salje,H., Cummings,D., Lessler,J., Melendrez,M., Endy,T., Kalanarooj,S., A-Nuegoonpipat,A., Chanama,S., Sangkijporn,S., Klungthong,C., Thaisomboonsuk,B., Nisalak,A., Gibbons,R., Iamsirithaworn,S.,…	2021-04-23T00:00:00Z	00696/13	Dengue virus	Flavivirus	Flaviviridae	ssRNA(+)	10175	GenBank	partial	0	Thailand	Thailand	Homo sapiens	0	2013	Dengue virus type 2 isolate 00696/13 polyprotein (POLY) gene, partial cds
MW946572.1	Katzelnick,L., Escoto,A., Huang,A., Garcia-Carreras,B., Chowdhury,N., Berry,I., Chavez,C., Rutvisuttinunt,W., Buchy,P., Duong,V., Dussart,P., Gromowski,G., Macareo,L., Smith,D., Jarman,R., Whitehead,S., Salje,H., Cummings,D., Lessler,J., Melendrez,M., Endy,T., Kalanarooj,S., A-Nuegoonpipat,A., Chanama,S., Sangkijporn,S., Klungthong,C., Thaisomboonsuk,B., Nisalak,A., Gibbons,R., Iamsirithaworn,S.,…	2021-04-23T00:00:00Z	01001/95	Dengue virus	Flavivirus	Flaviviridae	ssRNA(+)	10175	GenBank	partial	0	Thailand	Thailand	Homo sapiens	0	1995	Dengue virus type 2 isolate 01001/95 polyprotein (POLY) gene, partial cds
MW946571.1	Katzelnick,L., Escoto,A., Huang,A., Garcia-Carreras,B., Chowdhury,N., Berry,I., Chavez,C., Rutvisuttinunt,W., Buchy,P., Duong,V., Dussart,P., Gromowski,G., Macareo,L., Smith,D., Jarman,R., Whitehead,S., Salje,H., Cummings,D., Lessler,J., Melendrez,M., Endy,T., Kalanarooj,S., A-Nuegoonpipat,A., Chanama,S., Sangkijporn,S., Klungthong,C., Thaisomboonsuk,B., Nisalak,A., Gibbons,R., Iamsirithaworn,S.,…	2021-04-23T00:00:00Z	00996/96	Dengue virus	Flavivirus	Flaviviridae	ssRNA(+)	10175	GenBank	partial	0	Thailand	Thailand	Homo sapiens	0	1996	Dengue virus type 2 isolate 00996/96 polyprotein (POLY) gene, partial cds
MW946570.1	Katzelnick,L., Escoto,A., Huang,A., Garcia-Carreras,B., Chowdhury,N., Berry,I., Chavez,C., Rutvisuttinunt,W., Buchy,P., Duong,V., Dussart,P., Gromowski,G., Macareo,L., Smith,D., Jarman,R., Whitehead,S., Salje,H., Cummings,D., Lessler,J., Melendrez,M., Endy,T., Kalanarooj,S., A-Nuegoonpipat,A., Chanama,S., Sangkijporn,S., Klungthong,C., Thaisomboonsuk,B., Nisalak,A., Gibbons,R., Iamsirithaworn,S.,…	2021-04-23T00:00:00Z	02158/97	Dengue virus	Flavivirus	Flaviviridae	ssRNA(+)	10175	GenBank	partial	0	Thailand	Thailand	Homo sapiens	0	1997	Dengue virus type 2 isolate 02158/97 polyprotein (POLY) gene, partial cds
MW946569.1	Katzelnick,L., Escoto,A., Huang,A., Garcia-Carreras,B., Chowdhury,N., Berry,I., Chavez,C., Rutvisuttinunt,W., Buchy,P., Duong,V., Dussart,P., Gromowski,G., Macareo,L., Smith,D., Jarman,R., Whitehead,S., Salje,H., Cummings,D., Lessler,J., Melendrez,M., Endy,T., Kalanarooj,S., A-Nuegoonpipat,A., Chanama,S., Sangkijporn,S., Klungthong,C., Thaisomboonsuk,B., Nisalak,A., Gibbons,R., Iamsirithaworn,S.,…	2021-04-23T00:00:00Z	01084/04	Dengue virus	Flavivirus	Flaviviridae	ssRNA(+)	10175	GenBank	partial	0	Thailand	Thailand	Homo sapiens	0	2004	Dengue virus type 2 isolate 01084/04 polyprotein (POLY) gene, partial cds
MW946568.1	Katzelnick,L., Escoto,A., Huang,A., Garcia-Carreras,B., Chowdhury,N., Berry,I., Chavez,C., Rutvisuttinunt,W., Buchy,P., Duong,V., Dussart,P., Gromowski,G., Macareo,L., Smith,D., Jarman,R., Whitehead,S., Salje,H., Cummings,D., Lessler,J., Melendrez,M., Endy,T., Kalanarooj,S., A-Nuegoonpipat,A., Chanama,S., Sangkijporn,S., Klungthong,C., Thaisomboonsuk,B., Nisalak,A., Gibbons,R., Iamsirithaworn,S.,…	2021-04-23T00:00:00Z	01384/10	Dengue virus	Flavivirus	Flaviviridae	ssRNA(+)	10175	GenBank	partial	0	Thailand	Thailand	Homo sapiens	0	2010	Dengue virus type 2 isolate 01384/10 polyprotein (POLY) gene, partial cds
MW946567.1	Katzelnick,L., Escoto,A., Huang,A., Garcia-Carreras,B., Chowdhury,N., Berry,I., Chavez,C., Rutvisuttinunt,W., Buchy,P., Duong,V., Dussart,P., Gromowski,G., Macareo,L., Smith,D., Jarman,R., Whitehead,S., Salje,H., Cummings,D., Lessler,J., Melendrez,M., Endy,T., Kalanarooj,S., A-Nuegoonpipat,A., Chanama,S., Sangkijporn,S., Klungthong,C., Thaisomboonsuk,B., Nisalak,A., Gibbons,R., Iamsirithaworn,S.,…	2021-04-23T00:00:00Z	01429/11	Dengue virus	Flavivirus	Flaviviridae	ssRNA(+)	10175	GenBank	partial	0	Thailand	Thailand	Homo sapiens	0	2011	Dengue virus type 2 isolate 01429/11 polyprotein (POLY) gene, partial cds
MW946566.1	Katzelnick,L., Escoto,A., Huang,A., Garcia-Carreras,B., Chowdhury,N., Berry,I., Chavez,C., Rutvisuttinunt,W., Buchy,P., Duong,V., Dussart,P., Gromowski,G., Macareo,L., Smith,D., Jarman,R., Whitehead,S., Salje,H., Cummings,D., Lessler,J., Melendrez,M., Endy,T., Kalanarooj,S., A-Nuegoonpipat,A., Chanama,S., Sangkijporn,S., Klungthong,C., Thaisomboonsuk,B., Nisalak,A., Gibbons,R., Iamsirithaworn,S.,…	2021-04-23T00:00:00Z	00662/13	Dengue virus	Flavivirus	Flaviviridae	ssRNA(+)	10175	GenBank	partial	0	Thailand	Thailand	Homo sapiens	0	2013	Dengue virus type 2 isolate 00662/13 polyprotein (POLY) gene, partial cds
MW946565.1	Katzelnick,L., Escoto,A., Huang,A., Garcia-Carreras,B., Chowdhury,N., Berry,I., Chavez,C., Rutvisuttinunt,W., Buchy,P., Duong,V., Dussart,P., Gromowski,G., Macareo,L., Smith,D., Jarman,R., Whitehead,S., Salje,H., Cummings,D., Lessler,J., Melendrez,M., Endy,T., Kalanarooj,S., A-Nuegoonpipat,A., Chanama,S., Sangkijporn,S., Klungthong,C., Thaisomboonsuk,B., Nisalak,A., Gibbons,R., Iamsirithaworn,S.,…	2021-04-23T00:00:00Z	03680/99	Dengue virus	Flavivirus	Flaviviridae	ssRNA(+)	10175	GenBank	partial	0	Thailand	Thailand	Homo sapiens	0	1999	Dengue virus type 2 isolate 03680/99 polyprotein (POLY) gene, partial cds
MW946564.1	Katzelnick,L., Escoto,A., Huang,A., Garcia-Carreras,B., Chowdhury,N., Berry,I., Chavez,C., Rutvisuttinunt,W., Buchy,P., Duong,V., Dussart,P., Gromowski,G., Macareo,L., Smith,D., Jarman,R., Whitehead,S., Salje,H., Cummings,D., Lessler,J., Melendrez,M., Endy,T., Kalanarooj,S., A-Nuegoonpipat,A., Chanama,S., Sangkijporn,S., Klungthong,C., Thaisomboonsuk,B., Nisalak,A., Gibbons,R., Iamsirithaworn,S.,…	2021-04-23T00:00:00Z	SENDAK-HD-10674	Dengue virus	Flavivirus	Flaviviridae	ssRNA(+)	10176	GenBank	partial	0	Senegal	Senegal	Homo sapiens	0	1970	Dengue virus type 2 isolate SENDAK-HD-10674 polyprotein (POLY) gene, complete cds
MW946563.1	Katzelnick,L., Escoto,A., Huang,A., Garcia-Carreras,B., Chowdhury,N., Berry,I., Chavez,C., Rutvisuttinunt,W., Buchy,P., Duong,V., Dussart,P., Gromowski,G., Macareo,L., Smith,D., Jarman,R., Whitehead,S., Salje,H., Cummings,D., Lessler,J., Melendrez,M., Endy,T., Kalanarooj,S., A-Nuegoonpipat,A., Chanama,S., Sangkijporn,S., Klungthong,C., Thaisomboonsuk,B., Nisalak,A., Gibbons,R., Iamsirithaworn,S.,…	2021-04-23T00:00:00Z	01082/03	Dengue virus	Flavivirus	Flaviviridae	ssRNA(+)	10175	GenBank	partial	0	Thailand	Thailand	Homo sapiens	0	2003	Dengue virus type 2 isolate 01082/03 polyprotein (POLY) gene, partial cds
MW946562.1	Katzelnick,L., Escoto,A., Huang,A., Garcia-Carreras,B., Chowdhury,N., Berry,I., Chavez,C., Rutvisuttinunt,W., Buchy,P., Duong,V., Dussart,P., Gromowski,G., Macareo,L., Smith,D., Jarman,R., Whitehead,S., Salje,H., Cummings,D., Lessler,J., Melendrez,M., Endy,T., Kalanarooj,S., A-Nuegoonpipat,A., Chanama,S., Sangkijporn,S., Klungthong,C., Thaisomboonsuk,B., Nisalak,A., Gibbons,R., Iamsirithaworn,S.,…	2021-04-23T00:00:00Z	00895/95	Dengue virus	Flavivirus	Flaviviridae	ssRNA(+)	10175	GenBank	partial	0	Thailand	Thailand	Homo sapiens	0	1995	Dengue virus type 2 isolate 00895/95 polyprotein (POLY) gene, partial cds
MW946561.1	Katzelnick,L., Escoto,A., Huang,A., Garcia-Carreras,B., Chowdhury,N., Berry,I., Chavez,C., Rutvisuttinunt,W., Buchy,P., Duong,V., Dussart,P., Gromowski,G., Macareo,L., Smith,D., Jarman,R., Whitehead,S., Salje,H., Cummings,D., Lessler,J., Melendrez,M., Endy,T., Kalanarooj,S., A-Nuegoonpipat,A., Chanama,S., Sangkijporn,S., Klungthong,C., Thaisomboonsuk,B., Nisalak,A., Gibbons,R., Iamsirithaworn,S.,…	2021-04-23T00:00:00Z	00345/01	Dengue virus	Flavivirus	Flaviviridae	ssRNA(+)	10175	GenBank	partial	0	Thailand	Thailand	Homo sapiens	0	2001	Dengue virus type 2 isolate 00345/01 polyprotein (POLY) gene, partial cds
MW946560.1	Katzelnick,L., Escoto,A., Huang,A., Garcia-Carreras,B., Chowdhury,N., Berry,I., Chavez,C., Rutvisuttinunt,W., Buchy,P., Duong,V., Dussart,P., Gromowski,G., Macareo,L., Smith,D., Jarman,R., Whitehead,S., Salje,H., Cummings,D., Lessler,J., Melendrez,M., Endy,T., Kalanarooj,S., A-Nuegoonpipat,A., Chanama,S., Sangkijporn,S., Klungthong,C., Thaisomboonsuk,B., Nisalak,A., Gibbons,R., Iamsirithaworn,S.,…	2021-04-23T00:00:00Z	00458/98	Dengue virus	Flavivirus	Flaviviridae	ssRNA(+)	10175	GenBank	partial	0	Thailand	Thailand	Homo sapiens	0	1998	Dengue virus type 2 isolate 00458/98 polyprotein (POLY) gene, partial cds
MW946559.1	Katzelnick,L., Escoto,A., Huang,A., Garcia-Carreras,B., Chowdhury,N., Berry,I., Chavez,C., Rutvisuttinunt,W., Buchy,P., Duong,V., Dussart,P., Gromowski,G., Macareo,L., Smith,D., Jarman,R., Whitehead,S., Salje,H., Cummings,D., Lessler,J., Melendrez,M., Endy,T., Kalanarooj,S., A-Nuegoonpipat,A., Chanama,S., Sangkijporn,S., Klungthong,C., Thaisomboonsuk,B., Nisalak,A., Gibbons,R., Iamsirithaworn,S.,…	2021-04-23T00:00:00Z	02660/06	Dengue virus	Flavivirus	Flaviviridae	ssRNA(+)	10175	GenBank	partial	0	Thailand	Thailand	Homo sapiens	0	2006	Dengue virus type 2 isolate 02660/06 polyprotein (POLY) gene, partial cds
MW946558.1	Katzelnick,L., Escoto,A., Huang,A., Garcia-Carreras,B., Chowdhury,N., Berry,I., Chavez,C., Rutvisuttinunt,W., Buchy,P., Duong,V., Dussart,P., Gromowski,G., Macareo,L., Smith,D., Jarman,R., Whitehead,S., Salje,H., Cummings,D., Lessler,J., Melendrez,M., Endy,T., Kalanarooj,S., A-Nuegoonpipat,A., Chanama,S., Sangkijporn,S., Klungthong,C., Thaisomboonsuk,B., Nisalak,A., Gibbons,R., Iamsirithaworn,S.,…	2021-04-23T00:00:00Z	00050/03	Dengue virus	Flavivirus	Flaviviridae	ssRNA(+)	10175	GenBank	partial	0	Thailand	Thailand	Homo sapiens	0	2003	Dengue virus type 2 isolate 00050/03 polyprotein (POLY) gene, partial cds
MW946557.1	Katzelnick,L., Escoto,A., Huang,A., Garcia-Carreras,B., Chowdhury,N., Berry,I., Chavez,C., Rutvisuttinunt,W., Buchy,P., Duong,V., Dussart,P., Gromowski,G., Macareo,L., Smith,D., Jarman,R., Whitehead,S., Salje,H., Cummings,D., Lessler,J., Melendrez,M., Endy,T., Kalanarooj,S., A-Nuegoonpipat,A., Chanama,S., Sangkijporn,S., Klungthong,C., Thaisomboonsuk,B., Nisalak,A., Gibbons,R., Iamsirithaworn,S.,…	2021-04-23T00:00:00Z	01340/10	Dengue virus	Flavivirus	Flaviviridae	ssRNA(+)	10175	GenBank	partial	0	Thailand	Thailand	Homo sapiens	0	2010	Dengue virus type 2 isolate 01340/10 polyprotein (POLY) gene, partial cds
MW946556.1	Katzelnick,L., Escoto,A., Huang,A., Garcia-Carreras,B., Chowdhury,N., Berry,I., Chavez,C., Rutvisuttinunt,W., Buchy,P., Duong,V., Dussart,P., Gromowski,G., Macareo,L., Smith,D., Jarman,R., Whitehead,S., Salje,H., Cummings,D., Lessler,J., Melendrez,M., Endy,T., Kalanarooj,S., A-Nuegoonpipat,A., Chanama,S., Sangkijporn,S., Klungthong,C., Thaisomboonsuk,B., Nisalak,A., Gibbons,R., Iamsirithaworn,S.,…	2021-04-23T00:00:00Z	01082/95	Dengue virus	Flavivirus	Flaviviridae	ssRNA(+)	10175	GenBank	partial	0	Thailand	Thailand	Homo sapiens	0	1995	Dengue virus type 2 isolate 01082/95 polyprotein (POLY) gene, partial cds
MW946555.1	Katzelnick,L., Escoto,A., Huang,A., Garcia-Carreras,B., Chowdhury,N., Berry,I., Chavez,C., Rutvisuttinunt,W., Buchy,P., Duong,V., Dussart,P., Gromowski,G., Macareo,L., Smith,D., Jarman,R., Whitehead,S., Salje,H., Cummings,D., Lessler,J., Melendrez,M., Endy,T., Kalanarooj,S., A-Nuegoonpipat,A., Chanama,S., Sangkijporn,S., Klungthong,C., Thaisomboonsuk,B., Nisalak,A., Gibbons,R., Iamsirithaworn,S.,…	2021-04-23T00:00:00Z	00907/12	Dengue virus	Flavivirus	Flaviviridae	ssRNA(+)	10175	GenBank	partial	0	Thailand	Thailand	Homo sapiens	0	2012	Dengue virus type 2 isolate 00907/12 polyprotein (POLY) gene, partial cds
MW946554.1	Katzelnick,L., Escoto,A., Huang,A., Garcia-Carreras,B., Chowdhury,N., Berry,I., Chavez,C., Rutvisuttinunt,W., Buchy,P., Duong,V., Dussart,P., Gromowski,G., Macareo,L., Smith,D., Jarman,R., Whitehead,S., Salje,H., Cummings,D., Lessler,J., Melendrez,M., Endy,T., Kalanarooj,S., A-Nuegoonpipat,A., Chanama,S., Sangkijporn,S., Klungthong,C., Thaisomboonsuk,B., Nisalak,A., Gibbons,R., Iamsirithaworn,S.,…	2021-04-23T00:00:00Z	00206/11	Dengue virus	Flavivirus	Flaviviridae	ssRNA(+)	10175	GenBank	partial	0	Thailand	Thailand	Homo sapiens	0	2011	Dengue virus type 2 isolate 00206/11 polyprotein (POLY) gene, partial cds
MW946553.1	Katzelnick,L., Escoto,A., Huang,A., Garcia-Carreras,B., Chowdhury,N., Berry,I., Chavez,C., Rutvisuttinunt,W., Buchy,P., Duong,V., Dussart,P., Gromowski,G., Macareo,L., Smith,D., Jarman,R., Whitehead,S., Salje,H., Cummings,D., Lessler,J., Melendrez,M., Endy,T., Kalanarooj,S., A-Nuegoonpipat,A., Chanama,S., Sangkijporn,S., Klungthong,C., Thaisomboonsuk,B., Nisalak,A., Gibbons,R., Iamsirithaworn,S.,…	2021-04-23T00:00:00Z	01175/96	Dengue virus	Flavivirus	Flaviviridae	ssRNA(+)	10175	GenBank	partial	0	Thailand	Thailand	Homo sapiens	0	1996	Dengue virus type 2 isolate 01175/96 polyprotein (POLY) gene, partial cds
MW946552.1	Katzelnick,L., Escoto,A., Huang,A., Garcia-Carreras,B., Chowdhury,N., Berry,I., Chavez,C., Rutvisuttinunt,W., Buchy,P., Duong,V., Dussart,P., Gromowski,G., Macareo,L., Smith,D., Jarman,R., Whitehead,S., Salje,H., Cummings,D., Lessler,J., Melendrez,M., Endy,T., Kalanarooj,S., A-Nuegoonpipat,A., Chanama,S., Sangkijporn,S., Klungthong,C., Thaisomboonsuk,B., Nisalak,A., Gibbons,R., Iamsirithaworn,S.,…	2021-04-23T00:00:00Z	00720/06	Dengue virus	Flavivirus	Flaviviridae	ssRNA(+)	10175	GenBank	partial	0	Thailand	Thailand	Homo sapiens	0	2006	Dengue virus type 2 isolate 00720/06 polyprotein (POLY) gene, partial cds
MW946551.1	Katzelnick,L., Escoto,A., Huang,A., Garcia-Carreras,B., Chowdhury,N., Berry,I., Chavez,C., Rutvisuttinunt,W., Buchy,P., Duong,V., Dussart,P., Gromowski,G., Macareo,L., Smith,D., Jarman,R., Whitehead,S., Salje,H., Cummings,D., Lessler,J., Melendrez,M., Endy,T., Kalanarooj,S., A-Nuegoonpipat,A., Chanama,S., Sangkijporn,S., Klungthong,C., Thaisomboonsuk,B., Nisalak,A., Gibbons,R., Iamsirithaworn,S.,…	2021-04-23T00:00:00Z	05493/97	Dengue virus	Flavivirus	Flaviviridae	ssRNA(+)	10175	GenBank	partial	0	Thailand	Thailand	Homo sapiens	0	1997	Dengue virus type 2 isolate 05493/97 polyprotein (POLY) gene, partial cds
MW946550.1	Katzelnick,L., Escoto,A., Huang,A., Garcia-Carreras,B., Chowdhury,N., Berry,I., Chavez,C., Rutvisuttinunt,W., Buchy,P., Duong,V., Dussart,P., Gromowski,G., Macareo,L., Smith,D., Jarman,R., Whitehead,S., Salje,H., Cummings,D., Lessler,J., Melendrez,M., Endy,T., Kalanarooj,S., A-Nuegoonpipat,A., Chanama,S., Sangkijporn,S., Klungthong,C., Thaisomboonsuk,B., Nisalak,A., Gibbons,R., Iamsirithaworn,S.,…	2021-04-23T00:00:00Z	01113/12	Dengue virus	Flavivirus	Flaviviridae	ssRNA(+)	10175	GenBank	partial	0	Thailand	Thailand	Homo sapiens	0	2012	Dengue virus type 2 isolate 01113/12 polyprotein (POLY) gene, partial cds
MW946549.1	Katzelnick,L., Escoto,A., Huang,A., Garcia-Carreras,B., Chowdhury,N., Berry,I., Chavez,C., Rutvisuttinunt,W., Buchy,P., Duong,V., Dussart,P., Gromowski,G., Macareo,L., Smith,D., Jarman,R., Whitehead,S., Salje,H., Cummings,D., Lessler,J., Melendrez,M., Endy,T., Kalanarooj,S., A-Nuegoonpipat,A., Chanama,S., Sangkijporn,S., Klungthong,C., Thaisomboonsuk,B., Nisalak,A., Gibbons,R., Iamsirithaworn,S.,…	2021-04-23T00:00:00Z	01865/96	Dengue virus	Flavivirus	Flaviviridae	ssRNA(+)	10175	GenBank	partial	0	Thailand	Thailand	Homo sapiens	0	1996	Dengue virus type 2 isolate 01865/96 polyprotein (POLY) gene, partial cds
MW946548.1	Katzelnick,L., Escoto,A., Huang,A., Garcia-Carreras,B., Chowdhury,N., Berry,I., Chavez,C., Rutvisuttinunt,W., Buchy,P., Duong,V., Dussart,P., Gromowski,G., Macareo,L., Smith,D., Jarman,R., Whitehead,S., Salje,H., Cummings,D., Lessler,J., Melendrez,M., Endy,T., Kalanarooj,S., A-Nuegoonpipat,A., Chanama,S., Sangkijporn,S., Klungthong,C., Thaisomboonsuk,B., Nisalak,A., Gibbons,R., Iamsirithaworn,S.,…	2021-04-23T00:00:00Z	04790/99	Dengue virus	Flavivirus	Flaviviridae	ssRNA(+)	10175	GenBank	partial	0	Thailand	Thailand	Homo sapiens	0	1999	Dengue virus type 2 isolate 04790/99 polyprotein (POLY) gene, partial cds
MW946547.1	Katzelnick,L., Escoto,A., Huang,A., Garcia-Carreras,B., Chowdhury,N., Berry,I., Chavez,C., Rutvisuttinunt,W., Buchy,P., Duong,V., Dussart,P., Gromowski,G., Macareo,L., Smith,D., Jarman,R., Whitehead,S., Salje,H., Cummings,D., Lessler,J., Melendrez,M., Endy,T., Kalanarooj,S., A-Nuegoonpipat,A., Chanama,S., Sangkijporn,S., Klungthong,C., Thaisomboonsuk,B., Nisalak,A., Gibbons,R., Iamsirithaworn,S.,…	2021-04-23T00:00:00Z	05042/01	Dengue virus	Flavivirus	Flaviviridae	ssRNA(+)	10175	GenBank	partial	0	Thailand	Thailand	Homo sapiens	0	2001	Dengue virus type 2 isolate 05042/01 polyprotein (POLY) gene, partial cds
MW946546.1	Katzelnick,L., Escoto,A., Huang,A., Garcia-Carreras,B., Chowdhury,N., Berry,I., Chavez,C., Rutvisuttinunt,W., Buchy,P., Duong,V., Dussart,P., Gromowski,G., Macareo,L., Smith,D., Jarman,R., Whitehead,S., Salje,H., Cummings,D., Lessler,J., Melendrez,M., Endy,T., Kalanarooj,S., A-Nuegoonpipat,A., Chanama,S., Sangkijporn,S., Klungthong,C., Thaisomboonsuk,B., Nisalak,A., Gibbons,R., Iamsirithaworn,S.,…	2021-04-23T00:00:00Z	06902/98	Dengue virus	Flavivirus	Flaviviridae	ssRNA(+)	10175	GenBank	partial	0	Thailand	Thailand	Homo sapiens	0	1998	Dengue virus type 2 isolate 06902/98 polyprotein (POLY) gene, partial cds
MW946545.1	Katzelnick,L., Escoto,A., Huang,A., Garcia-Carreras,B., Chowdhury,N., Berry,I., Chavez,C., Rutvisuttinunt,W., Buchy,P., Duong,V., Dussart,P., Gromowski,G., Macareo,L., Smith,D., Jarman,R., Whitehead,S., Salje,H., Cummings,D., Lessler,J., Melendrez,M., Endy,T., Kalanarooj,S., A-Nuegoonpipat,A., Chanama,S., Sangkijporn,S., Klungthong,C., Thaisomboonsuk,B., Nisalak,A., Gibbons,R., Iamsirithaworn,S.,…	2021-04-23T00:00:00Z	01363/10	Dengue virus	Flavivirus	Flaviviridae	ssRNA(+)	10175	GenBank	partial	0	Thailand	Thailand	Homo sapiens	0	2010	Dengue virus type 2 isolate 01363/10 polyprotein (POLY) gene, partial cds
MW946544.1	Katzelnick,L., Escoto,A., Huang,A., Garcia-Carreras,B., Chowdhury,N., Berry,I., Chavez,C., Rutvisuttinunt,W., Buchy,P., Duong,V., Dussart,P., Gromowski,G., Macareo,L., Smith,D., Jarman,R., Whitehead,S., Salje,H., Cummings,D., Lessler,J., Melendrez,M., Endy,T., Kalanarooj,S., A-Nuegoonpipat,A., Chanama,S., Sangkijporn,S., Klungthong,C., Thaisomboonsuk,B., Nisalak,A., Gibbons,R., Iamsirithaworn,S.,…	2021-04-23T00:00:00Z	00144/12	Dengue virus	Flavivirus	Flaviviridae	ssRNA(+)	10175	GenBank	partial	0	Thailand	Thailand	Homo sapiens	0	2012	Dengue virus type 2 isolate 00144/12 polyprotein (POLY) gene, partial cds
MW946543.1	Katzelnick,L., Escoto,A., Huang,A., Garcia-Carreras,B., Chowdhury,N., Berry,I., Chavez,C., Rutvisuttinunt,W., Buchy,P., Duong,V., Dussart,P., Gromowski,G., Macareo,L., Smith,D., Jarman,R., Whitehead,S., Salje,H., Cummings,D., Lessler,J., Melendrez,M., Endy,T., Kalanarooj,S., A-Nuegoonpipat,A., Chanama,S., Sangkijporn,S., Klungthong,C., Thaisomboonsuk,B., Nisalak,A., Gibbons,R., Iamsirithaworn,S.,…	2021-04-23T00:00:00Z	00020/96	Dengue virus	Flavivirus	Flaviviridae	ssRNA(+)	10175	GenBank	partial	0	Thailand	Thailand	Homo sapiens	0	1996	Dengue virus type 2 isolate 00020/96 polyprotein (POLY) gene, partial cds
MW946542.1	Katzelnick,L., Escoto,A., Huang,A., Garcia-Carreras,B., Chowdhury,N., Berry,I., Chavez,C., Rutvisuttinunt,W., Buchy,P., Duong,V., Dussart,P., Gromowski,G., Macareo,L., Smith,D., Jarman,R., Whitehead,S., Salje,H., Cummings,D., Lessler,J., Melendrez,M., Endy,T., Kalanarooj,S., A-Nuegoonpipat,A., Chanama,S., Sangkijporn,S., Klungthong,C., Thaisomboonsuk,B., Nisalak,A., Gibbons,R., Iamsirithaworn,S.,…	2021-04-23T00:00:00Z	00786/02	Dengue virus	Flavivirus	Flaviviridae	ssRNA(+)	10175	GenBank	partial	0	Thailand	Thailand	Homo sapiens	0	2002	Dengue virus type 2 isolate 00786/02 polyprotein (POLY) gene, partial cds
MW946541.1	Katzelnick,L., Escoto,A., Huang,A., Garcia-Carreras,B., Chowdhury,N., Berry,I., Chavez,C., Rutvisuttinunt,W., Buchy,P., Duong,V., Dussart,P., Gromowski,G., Macareo,L., Smith,D., Jarman,R., Whitehead,S., Salje,H., Cummings,D., Lessler,J., Melendrez,M., Endy,T., Kalanarooj,S., A-Nuegoonpipat,A., Chanama,S., Sangkijporn,S., Klungthong,C., Thaisomboonsuk,B., Nisalak,A., Gibbons,R., Iamsirithaworn,S.,…	2021-04-23T00:00:00Z	02971/02	Dengue virus	Flavivirus	Flaviviridae	ssRNA(+)	10175	GenBank	partial	0	Thailand	Thailand	Homo sapiens	0	2002	Dengue virus type 2 isolate 02971/02 polyprotein (POLY) gene, partial cds
MW946540.1	Katzelnick,L., Escoto,A., Huang,A., Garcia-Carreras,B., Chowdhury,N., Berry,I., Chavez,C., Rutvisuttinunt,W., Buchy,P., Duong,V., Dussart,P., Gromowski,G., Macareo,L., Smith,D., Jarman,R., Whitehead,S., Salje,H., Cummings,D., Lessler,J., Melendrez,M., Endy,T., Kalanarooj,S., A-Nuegoonpipat,A., Chanama,S., Sangkijporn,S., Klungthong,C., Thaisomboonsuk,B., Nisalak,A., Gibbons,R., Iamsirithaworn,S.,…	2021-04-23T00:00:00Z	00441/98	Dengue virus	Flavivirus	Flaviviridae	ssRNA(+)	10175	GenBank	partial	0	Thailand	Thailand	Homo sapiens	0	1998	Dengue virus type 2 isolate 00441/98 polyprotein (POLY) gene, partial cds
MW946539.1	Katzelnick,L., Escoto,A., Huang,A., Garcia-Carreras,B., Chowdhury,N., Berry,I., Chavez,C., Rutvisuttinunt,W., Buchy,P., Duong,V., Dussart,P., Gromowski,G., Macareo,L., Smith,D., Jarman,R., Whitehead,S., Salje,H., Cummings,D., Lessler,J., Melendrez,M., Endy,T., Kalanarooj,S., A-Nuegoonpipat,A., Chanama,S., Sangkijporn,S., Klungthong,C., Thaisomboonsuk,B., Nisalak,A., Gibbons,R., Iamsirithaworn,S.,…	2021-04-23T00:00:00Z	00126/94	Dengue virus	Flavivirus	Flaviviridae	ssRNA(+)	10175	GenBank	partial	0	Thailand	Thailand	Homo sapiens	0	1994	Dengue virus type 2 isolate 00126/94 polyprotein (POLY) gene, partial cds
MW946538.1	Katzelnick,L., Escoto,A., Huang,A., Garcia-Carreras,B., Chowdhury,N., Berry,I., Chavez,C., Rutvisuttinunt,W., Buchy,P., Duong,V., Dussart,P., Gromowski,G., Macareo,L., Smith,D., Jarman,R., Whitehead,S., Salje,H., Cummings,D., Lessler,J., Melendrez,M., Endy,T., Kalanarooj,S., A-Nuegoonpipat,A., Chanama,S., Sangkijporn,S., Klungthong,C., Thaisomboonsuk,B., Nisalak,A., Gibbons,R., Iamsirithaworn,S.,…	2021-04-23T00:00:00Z	00615/01	Dengue virus	Flavivirus	Flaviviridae	ssRNA(+)	10175	GenBank	partial	0	Thailand	Thailand	Homo sapiens	0	2001	Dengue virus type 2 isolate 00615/01 polyprotein (POLY) gene, partial cds
MW946537.1	Katzelnick,L., Escoto,A., Huang,A., Garcia-Carreras,B., Chowdhury,N., Berry,I., Chavez,C., Rutvisuttinunt,W., Buchy,P., Duong,V., Dussart,P., Gromowski,G., Macareo,L., Smith,D., Jarman,R., Whitehead,S., Salje,H., Cummings,D., Lessler,J., Melendrez,M., Endy,T., Kalanarooj,S., A-Nuegoonpipat,A., Chanama,S., Sangkijporn,S., Klungthong,C., Thaisomboonsuk,B., Nisalak,A., Gibbons,R., Iamsirithaworn,S.,…	2021-04-23T00:00:00Z	00364/99	Dengue virus	Flavivirus	Flaviviridae	ssRNA(+)	10175	GenBank	partial	0	Thailand	Thailand	Homo sapiens	0	1999	Dengue virus type 2 isolate 00364/99 polyprotein (POLY) gene, partial cds
MW946536.1	Katzelnick,L., Escoto,A., Huang,A., Garcia-Carreras,B., Chowdhury,N., Berry,I., Chavez,C., Rutvisuttinunt,W., Buchy,P., Duong,V., Dussart,P., Gromowski,G., Macareo,L., Smith,D., Jarman,R., Whitehead,S., Salje,H., Cummings,D., Lessler,J., Melendrez,M., Endy,T., Kalanarooj,S., A-Nuegoonpipat,A., Chanama,S., Sangkijporn,S., Klungthong,C., Thaisomboonsuk,B., Nisalak,A., Gibbons,R., Iamsirithaworn,S.,…	2021-04-23T00:00:00Z	01309/96	Dengue virus	Flavivirus	Flaviviridae	ssRNA(+)	10175	GenBank	partial	0	Thailand	Thailand	Homo sapiens	0	1996	Dengue virus type 2 isolate 01309/96 polyprotein (POLY) gene, partial cds
MW946535.1	Katzelnick,L., Escoto,A., Huang,A., Garcia-Carreras,B., Chowdhury,N., Berry,I., Chavez,C., Rutvisuttinunt,W., Buchy,P., Duong,V., Dussart,P., Gromowski,G., Macareo,L., Smith,D., Jarman,R., Whitehead,S., Salje,H., Cummings,D., Lessler,J., Melendrez,M., Endy,T., Kalanarooj,S., A-Nuegoonpipat,A., Chanama,S., Sangkijporn,S., Klungthong,C., Thaisomboonsuk,B., Nisalak,A., Gibbons,R., Iamsirithaworn,S.,…	2021-04-23T00:00:00Z	01009/02	Dengue virus	Flavivirus	Flaviviridae	ssRNA(+)	10175	GenBank	partial	0	Thailand	Thailand	Homo sapiens	0	2002	Dengue virus type 2 isolate 01009/02 polyprotein (POLY) gene, partial cds
MW946534.1	Katzelnick,L., Escoto,A., Huang,A., Garcia-Carreras,B., Chowdhury,N., Berry,I., Chavez,C., Rutvisuttinunt,W., Buchy,P., Duong,V., Dussart,P., Gromowski,G., Macareo,L., Smith,D., Jarman,R., Whitehead,S., Salje,H., Cummings,D., Lessler,J., Melendrez,M., Endy,T., Kalanarooj,S., A-Nuegoonpipat,A., Chanama,S., Sangkijporn,S., Klungthong,C., Thaisomboonsuk,B., Nisalak,A., Gibbons,R., Iamsirithaworn,S.,…	2021-04-23T00:00:00Z	00139/03	Dengue virus	Flavivirus	Flaviviridae	ssRNA(+)	10175	GenBank	partial	0	Thailand	Thailand	Homo sapiens	0	2003	Dengue virus type 2 isolate 00139/03 polyprotein (POLY) gene, partial cds
MW946533.1	Katzelnick,L., Escoto,A., Huang,A., Garcia-Carreras,B., Chowdhury,N., Berry,I., Chavez,C., Rutvisuttinunt,W., Buchy,P., Duong,V., Dussart,P., Gromowski,G., Macareo,L., Smith,D., Jarman,R., Whitehead,S., Salje,H., Cummings,D., Lessler,J., Melendrez,M., Endy,T., Kalanarooj,S., A-Nuegoonpipat,A., Chanama,S., Sangkijporn,S., Klungthong,C., Thaisomboonsuk,B., Nisalak,A., Gibbons,R., Iamsirithaworn,S.,…	2021-04-23T00:00:00Z	02071/07	Dengue virus	Flavivirus	Flaviviridae	ssRNA(+)	10175	GenBank	partial	0	Thailand	Thailand	Homo sapiens	0	2007	Dengue virus type 2 isolate 02071/07 polyprotein (POLY) gene, partial cds
MW946532.1	Katzelnick,L., Escoto,A., Huang,A., Garcia-Carreras,B., Chowdhury,N., Berry,I., Chavez,C., Rutvisuttinunt,W., Buchy,P., Duong,V., Dussart,P., Gromowski,G., Macareo,L., Smith,D., Jarman,R., Whitehead,S., Salje,H., Cummings,D., Lessler,J., Melendrez,M., Endy,T., Kalanarooj,S., A-Nuegoonpipat,A., Chanama,S., Sangkijporn,S., Klungthong,C., Thaisomboonsuk,B., Nisalak,A., Gibbons,R., Iamsirithaworn,S.,…	2021-04-23T00:00:00Z	00015/99	Dengue virus	Flavivirus	Flaviviridae	ssRNA(+)	10175	GenBank	partial	0	Thailand	Thailand	Homo sapiens	0	1999	Dengue virus type 2 isolate 00015/99 polyprotein (POLY) gene, partial cds
MW946531.1	Katzelnick,L., Escoto,A., Huang,A., Garcia-Carreras,B., Chowdhury,N., Berry,I., Chavez,C., Rutvisuttinunt,W., Buchy,P., Duong,V., Dussart,P., Gromowski,G., Macareo,L., Smith,D., Jarman,R., Whitehead,S., Salje,H., Cummings,D., Lessler,J., Melendrez,M., Endy,T., Kalanarooj,S., A-Nuegoonpipat,A., Chanama,S., Sangkijporn,S., Klungthong,C., Thaisomboonsuk,B., Nisalak,A., Gibbons,R., Iamsirithaworn,S.,…	2021-04-23T00:00:00Z	00791/10	Dengue virus	Flavivirus	Flaviviridae	ssRNA(+)	10175	GenBank	partial	0	Thailand	Thailand	Homo sapiens	0	2010	Dengue virus type 2 isolate 00791/10 polyprotein (POLY) gene, partial cds
MW946530.1	Katzelnick,L., Escoto,A., Huang,A., Garcia-Carreras,B., Chowdhury,N., Berry,I., Chavez,C., Rutvisuttinunt,W., Buchy,P., Duong,V., Dussart,P., Gromowski,G., Macareo,L., Smith,D., Jarman,R., Whitehead,S., Salje,H., Cummings,D., Lessler,J., Melendrez,M., Endy,T., Kalanarooj,S., A-Nuegoonpipat,A., Chanama,S., Sangkijporn,S., Klungthong,C., Thaisomboonsuk,B., Nisalak,A., Gibbons,R., Iamsirithaworn,S.,…	2021-04-23T00:00:00Z	05342/99	Dengue virus	Flavivirus	Flaviviridae	ssRNA(+)	10175	GenBank	partial	0	Thailand	Thailand	Homo sapiens	0	1999	Dengue virus type 2 isolate 05342/99 polyprotein (POLY) gene, partial cds
MW946529.1	Katzelnick,L., Escoto,A., Huang,A., Garcia-Carreras,B., Chowdhury,N., Berry,I., Chavez,C., Rutvisuttinunt,W., Buchy,P., Duong,V., Dussart,P., Gromowski,G., Macareo,L., Smith,D., Jarman,R., Whitehead,S., Salje,H., Cummings,D., Lessler,J., Melendrez,M., Endy,T., Kalanarooj,S., A-Nuegoonpipat,A., Chanama,S., Sangkijporn,S., Klungthong,C., Thaisomboonsuk,B., Nisalak,A., Gibbons,R., Iamsirithaworn,S.,…	2021-04-23T00:00:00Z	01005/02	Dengue virus	Flavivirus	Flaviviridae	ssRNA(+)	10175	GenBank	partial	0	Thailand	Thailand	Homo sapiens	0	2002	Dengue virus type 2 isolate 01005/02 polyprotein (POLY) gene, partial cds
MW946528.1	Katzelnick,L., Escoto,A., Huang,A., Garcia-Carreras,B., Chowdhury,N., Berry,I., Chavez,C., Rutvisuttinunt,W., Buchy,P., Duong,V., Dussart,P., Gromowski,G., Macareo,L., Smith,D., Jarman,R., Whitehead,S., Salje,H., Cummings,D., Lessler,J., Melendrez,M., Endy,T., Kalanarooj,S., A-Nuegoonpipat,A., Chanama,S., Sangkijporn,S., Klungthong,C., Thaisomboonsuk,B., Nisalak,A., Gibbons,R., Iamsirithaworn,S.,…	2021-04-23T00:00:00Z	02094/02	Dengue virus	Flavivirus	Flaviviridae	ssRNA(+)	10175	GenBank	partial	0	Thailand	Thailand	Homo sapiens	0	2002	Dengue virus type 2 isolate 02094/02 polyprotein (POLY) gene, partial cds
MW946527.1	Katzelnick,L., Escoto,A., Huang,A., Garcia-Carreras,B., Chowdhury,N., Berry,I., Chavez,C., Rutvisuttinunt,W., Buchy,P., Duong,V., Dussart,P., Gromowski,G., Macareo,L., Smith,D., Jarman,R., Whitehead,S., Salje,H., Cummings,D., Lessler,J., Melendrez,M., Endy,T., Kalanarooj,S., A-Nuegoonpipat,A., Chanama,S., Sangkijporn,S., Klungthong,C., Thaisomboonsuk,B., Nisalak,A., Gibbons,R., Iamsirithaworn,S.,…	2021-04-23T00:00:00Z	02398/06	Dengue virus	Flavivirus	Flaviviridae	ssRNA(+)	10175	GenBank	partial	0	Thailand	Thailand	Homo sapiens	0	2006	Dengue virus type 2 isolate 02398/06 polyprotein (POLY) gene, partial cds
MW946526.1	Katzelnick,L., Escoto,A., Huang,A., Garcia-Carreras,B., Chowdhury,N., Berry,I., Chavez,C., Rutvisuttinunt,W., Buchy,P., Duong,V., Dussart,P., Gromowski,G., Macareo,L., Smith,D., Jarman,R., Whitehead,S., Salje,H., Cummings,D., Lessler,J., Melendrez,M., Endy,T., Kalanarooj,S., A-Nuegoonpipat,A., Chanama,S., Sangkijporn,S., Klungthong,C., Thaisomboonsuk,B., Nisalak,A., Gibbons,R., Iamsirithaworn,S.,…	2021-04-23T00:00:00Z	01536/94	Dengue virus	Flavivirus	Flaviviridae	ssRNA(+)	10175	GenBank	partial	0	Thailand	Thailand	Homo sapiens	0	1994	Dengue virus type 2 isolate 01536/94 polyprotein (POLY) gene, partial cds
MW946525.1	Katzelnick,L., Escoto,A., Huang,A., Garcia-Carreras,B., Chowdhury,N., Berry,I., Chavez,C., Rutvisuttinunt,W., Buchy,P., Duong,V., Dussart,P., Gromowski,G., Macareo,L., Smith,D., Jarman,R., Whitehead,S., Salje,H., Cummings,D., Lessler,J., Melendrez,M., Endy,T., Kalanarooj,S., A-Nuegoonpipat,A., Chanama,S., Sangkijporn,S., Klungthong,C., Thaisomboonsuk,B., Nisalak,A., Gibbons,R., Iamsirithaworn,S.,…	2021-04-23T00:00:00Z	01109/10	Dengue virus	Flavivirus	Flaviviridae	ssRNA(+)	10175	GenBank	partial	0	Thailand	Thailand	Homo sapiens	0	2010	Dengue virus type 2 isolate 01109/10 polyprotein (POLY) gene, partial cds
MW946524.1	Katzelnick,L., Escoto,A., Huang,A., Garcia-Carreras,B., Chowdhury,N., Berry,I., Chavez,C., Rutvisuttinunt,W., Buchy,P., Duong,V., Dussart,P., Gromowski,G., Macareo,L., Smith,D., Jarman,R., Whitehead,S., Salje,H., Cummings,D., Lessler,J., Melendrez,M., Endy,T., Kalanarooj,S., A-Nuegoonpipat,A., Chanama,S., Sangkijporn,S., Klungthong,C., Thaisomboonsuk,B., Nisalak,A., Gibbons,R., Iamsirithaworn,S.,…	2021-04-23T00:00:00Z	01209/02	Dengue virus	Flavivirus	Flaviviridae	ssRNA(+)	10175	GenBank	partial	0	Thailand	Thailand	Homo sapiens	0	2002	Dengue virus type 2 isolate 01209/02 polyprotein (POLY) gene, partial cds
MW946523.1	Katzelnick,L., Escoto,A., Huang,A., Garcia-Carreras,B., Chowdhury,N., Berry,I., Chavez,C., Rutvisuttinunt,W., Buchy,P., Duong,V., Dussart,P., Gromowski,G., Macareo,L., Smith,D., Jarman,R., Whitehead,S., Salje,H., Cummings,D., Lessler,J., Melendrez,M., Endy,T., Kalanarooj,S., A-Nuegoonpipat,A., Chanama,S., Sangkijporn,S., Klungthong,C., Thaisomboonsuk,B., Nisalak,A., Gibbons,R., Iamsirithaworn,S.,…	2021-04-23T00:00:00Z	05888/00	Dengue virus	Flavivirus	Flaviviridae	ssRNA(+)	10175	GenBank	partial	0	Thailand	Thailand	Homo sapiens	0	2000	Dengue virus type 2 isolate 05888/00 polyprotein (POLY) gene, partial cds
MW946522.1	Katzelnick,L., Escoto,A., Huang,A., Garcia-Carreras,B., Chowdhury,N., Berry,I., Chavez,C., Rutvisuttinunt,W., Buchy,P., Duong,V., Dussart,P., Gromowski,G., Macareo,L., Smith,D., Jarman,R., Whitehead,S., Salje,H., Cummings,D., Lessler,J., Melendrez,M., Endy,T., Kalanarooj,S., A-Nuegoonpipat,A., Chanama,S., Sangkijporn,S., Klungthong,C., Thaisomboonsuk,B., Nisalak,A., Gibbons,R., Iamsirithaworn,S.,…	2021-04-23T00:00:00Z	04732/97	Dengue virus	Flavivirus	Flaviviridae	ssRNA(+)	10175	GenBank	partial	0	Thailand	Thailand	Homo sapiens	0	1997	Dengue virus type 2 isolate 04732/97 polyprotein (POLY) gene, partial cds
MW946521.1	Katzelnick,L., Escoto,A., Huang,A., Garcia-Carreras,B., Chowdhury,N., Berry,I., Chavez,C., Rutvisuttinunt,W., Buchy,P., Duong,V., Dussart,P., Gromowski,G., Macareo,L., Smith,D., Jarman,R., Whitehead,S., Salje,H., Cummings,D., Lessler,J., Melendrez,M., Endy,T., Kalanarooj,S., A-Nuegoonpipat,A., Chanama,S., Sangkijporn,S., Klungthong,C., Thaisomboonsuk,B., Nisalak,A., Gibbons,R., Iamsirithaworn,S.,…	2021-04-23T00:00:00Z	01693/03	Dengue virus	Flavivirus	Flaviviridae	ssRNA(+)	10175	GenBank	partial	0	Thailand	Thailand	Homo sapiens	0	2003	Dengue virus type 2 isolate 01693/03 polyprotein (POLY) gene, partial cds
MW946520.1	Katzelnick,L., Escoto,A., Huang,A., Garcia-Carreras,B., Chowdhury,N., Berry,I., Chavez,C., Rutvisuttinunt,W., Buchy,P., Duong,V., Dussart,P., Gromowski,G., Macareo,L., Smith,D., Jarman,R., Whitehead,S., Salje,H., Cummings,D., Lessler,J., Melendrez,M., Endy,T., Kalanarooj,S., A-Nuegoonpipat,A., Chanama,S., Sangkijporn,S., Klungthong,C., Thaisomboonsuk,B., Nisalak,A., Gibbons,R., Iamsirithaworn,S.,…	2021-04-23T00:00:00Z	04957/01	Dengue virus	Flavivirus	Flaviviridae	ssRNA(+)	10175	GenBank	partial	0	Thailand	Thailand	Homo sapiens	0	2001	Dengue virus type 2 isolate 04957/01 polyprotein (POLY) gene, partial cds
MW946519.1	Katzelnick,L., Escoto,A., Huang,A., Garcia-Carreras,B., Chowdhury,N., Berry,I., Chavez,C., Rutvisuttinunt,W., Buchy,P., Duong,V., Dussart,P., Gromowski,G., Macareo,L., Smith,D., Jarman,R., Whitehead,S., Salje,H., Cummings,D., Lessler,J., Melendrez,M., Endy,T., Kalanarooj,S., A-Nuegoonpipat,A., Chanama,S., Sangkijporn,S., Klungthong,C., Thaisomboonsuk,B., Nisalak,A., Gibbons,R., Iamsirithaworn,S.,…	2021-04-23T00:00:00Z	00911/10	Dengue virus	Flavivirus	Flaviviridae	ssRNA(+)	10175	GenBank	partial	0	Thailand	Thailand	Homo sapiens	0	2010	Dengue virus type 2 isolate 00911/10 polyprotein (POLY) gene, partial cds
MW946518.1	Katzelnick,L., Escoto,A., Huang,A., Garcia-Carreras,B., Chowdhury,N., Berry,I., Chavez,C., Rutvisuttinunt,W., Buchy,P., Duong,V., Dussart,P., Gromowski,G., Macareo,L., Smith,D., Jarman,R., Whitehead,S., Salje,H., Cummings,D., Lessler,J., Melendrez,M., Endy,T., Kalanarooj,S., A-Nuegoonpipat,A., Chanama,S., Sangkijporn,S., Klungthong,C., Thaisomboonsuk,B., Nisalak,A., Gibbons,R., Iamsirithaworn,S.,…	2021-04-23T00:00:00Z	01220/11	Dengue virus	Flavivirus	Flaviviridae	ssRNA(+)	10175	GenBank	partial	0	Thailand	Thailand	Homo sapiens	0	2011	Dengue virus type 2 isolate 01220/11 polyprotein (POLY) gene, partial cds
MW946517.1	Katzelnick,L., Escoto,A., Huang,A., Garcia-Carreras,B., Chowdhury,N., Berry,I., Chavez,C., Rutvisuttinunt,W., Buchy,P., Duong,V., Dussart,P., Gromowski,G., Macareo,L., Smith,D., Jarman,R., Whitehead,S., Salje,H., Cummings,D., Lessler,J., Melendrez,M., Endy,T., Kalanarooj,S., A-Nuegoonpipat,A., Chanama,S., Sangkijporn,S., Klungthong,C., Thaisomboonsuk,B., Nisalak,A., Gibbons,R., Iamsirithaworn,S.,…	2021-04-23T00:00:00Z	01574/05	Dengue virus	Flavivirus	Flaviviridae	ssRNA(+)	10175	GenBank	partial	0	Thailand	Thailand	Homo sapiens	0	2005	Dengue virus type 2 isolate 01574/05 polyprotein (POLY) gene, partial cds
MW946516.1	Katzelnick,L., Escoto,A., Huang,A., Garcia-Carreras,B., Chowdhury,N., Berry,I., Chavez,C., Rutvisuttinunt,W., Buchy,P., Duong,V., Dussart,P., Gromowski,G., Macareo,L., Smith,D., Jarman,R., Whitehead,S., Salje,H., Cummings,D., Lessler,J., Melendrez,M., Endy,T., Kalanarooj,S., A-Nuegoonpipat,A., Chanama,S., Sangkijporn,S., Klungthong,C., Thaisomboonsuk,B., Nisalak,A., Gibbons,R., Iamsirithaworn,S.,…	2021-04-23T00:00:00Z	01636/00	Dengue virus	Flavivirus	Flaviviridae	ssRNA(+)	10175	GenBank	partial	0	Thailand	Thailand	Homo sapiens	0	2000	Dengue virus type 2 isolate 01636/00 polyprotein (POLY) gene, partial cds
MW946515.1	Katzelnick,L., Escoto,A., Huang,A., Garcia-Carreras,B., Chowdhury,N., Berry,I., Chavez,C., Rutvisuttinunt,W., Buchy,P., Duong,V., Dussart,P., Gromowski,G., Macareo,L., Smith,D., Jarman,R., Whitehead,S., Salje,H., Cummings,D., Lessler,J., Melendrez,M., Endy,T., Kalanarooj,S., A-Nuegoonpipat,A., Chanama,S., Sangkijporn,S., Klungthong,C., Thaisomboonsuk,B., Nisalak,A., Gibbons,R., Iamsirithaworn,S.,…	2021-04-23T00:00:00Z	00937/94	Dengue virus	Flavivirus	Flaviviridae	ssRNA(+)	10175	GenBank	partial	0	Thailand	Thailand	Homo sapiens	0	1994	Dengue virus type 2 isolate 00937/94 polyprotein (POLY) gene, partial cds
MW946514.1	Katzelnick,L., Escoto,A., Huang,A., Garcia-Carreras,B., Chowdhury,N., Berry,I., Chavez,C., Rutvisuttinunt,W., Buchy,P., Duong,V., Dussart,P., Gromowski,G., Macareo,L., Smith,D., Jarman,R., Whitehead,S., Salje,H., Cummings,D., Lessler,J., Melendrez,M., Endy,T., Kalanarooj,S., A-Nuegoonpipat,A., Chanama,S., Sangkijporn,S., Klungthong,C., Thaisomboonsuk,B., Nisalak,A., Gibbons,R., Iamsirithaworn,S.,…	2021-04-23T00:00:00Z	03579/99	Dengue virus	Flavivirus	Flaviviridae	ssRNA(+)	10175	GenBank	partial	0	Thailand	Thailand	Homo sapiens	0	1999	Dengue virus type 2 isolate 03579/99 polyprotein (POLY) gene, partial cds
MW946513.1	Katzelnick,L., Escoto,A., Huang,A., Garcia-Carreras,B., Chowdhury,N., Berry,I., Chavez,C., Rutvisuttinunt,W., Buchy,P., Duong,V., Dussart,P., Gromowski,G., Macareo,L., Smith,D., Jarman,R., Whitehead,S., Salje,H., Cummings,D., Lessler,J., Melendrez,M., Endy,T., Kalanarooj,S., A-Nuegoonpipat,A., Chanama,S., Sangkijporn,S., Klungthong,C., Thaisomboonsuk,B., Nisalak,A., Gibbons,R., Iamsirithaworn,S.,…	2021-04-23T00:00:00Z	02174/97	Dengue virus	Flavivirus	Flaviviridae	ssRNA(+)	10175	GenBank	partial	0	Thailand	Thailand	Homo sapiens	0	1997	Dengue virus type 2 isolate 02174/97 polyprotein (POLY) gene, partial cds
MW946512.1	Katzelnick,L., Escoto,A., Huang,A., Garcia-Carreras,B., Chowdhury,N., Berry,I., Chavez,C., Rutvisuttinunt,W., Buchy,P., Duong,V., Dussart,P., Gromowski,G., Macareo,L., Smith,D., Jarman,R., Whitehead,S., Salje,H., Cummings,D., Lessler,J., Melendrez,M., Endy,T., Kalanarooj,S., A-Nuegoonpipat,A., Chanama,S., Sangkijporn,S., Klungthong,C., Thaisomboonsuk,B., Nisalak,A., Gibbons,R., Iamsirithaworn,S.,…	2021-04-23T00:00:00Z	00760/95	Dengue virus	Flavivirus	Flaviviridae	ssRNA(+)	10175	GenBank	partial	0	Thailand	Thailand	Homo sapiens	0	1995	Dengue virus type 2 isolate 00760/95 polyprotein (POLY) gene, partial cds
MW946511.1	Katzelnick,L., Escoto,A., Huang,A., Garcia-Carreras,B., Chowdhury,N., Berry,I., Chavez,C., Rutvisuttinunt,W., Buchy,P., Duong,V., Dussart,P., Gromowski,G., Macareo,L., Smith,D., Jarman,R., Whitehead,S., Salje,H., Cummings,D., Lessler,J., Melendrez,M., Endy,T., Kalanarooj,S., A-Nuegoonpipat,A., Chanama,S., Sangkijporn,S., Klungthong,C., Thaisomboonsuk,B., Nisalak,A., Gibbons,R., Iamsirithaworn,S.,…	2021-04-23T00:00:00Z	00436/95	Dengue virus	Flavivirus	Flaviviridae	ssRNA(+)	10175	GenBank	partial	0	Thailand	Thailand	Homo sapiens	0	1995	Dengue virus type 2 isolate 00436/95 polyprotein (POLY) gene, partial cds
MW946510.1	Katzelnick,L., Escoto,A., Huang,A., Garcia-Carreras,B., Chowdhury,N., Berry,I., Chavez,C., Rutvisuttinunt,W., Buchy,P., Duong,V., Dussart,P., Gromowski,G., Macareo,L., Smith,D., Jarman,R., Whitehead,S., Salje,H., Cummings,D., Lessler,J., Melendrez,M., Endy,T., Kalanarooj,S., A-Nuegoonpipat,A., Chanama,S., Sangkijporn,S., Klungthong,C., Thaisomboonsuk,B., Nisalak,A., Gibbons,R., Iamsirithaworn,S.,…	2021-04-23T00:00:00Z	00381/11	Dengue virus	Flavivirus	Flaviviridae	ssRNA(+)	10175	GenBank	partial	0	Thailand	Thailand	Homo sapiens	0	2011	Dengue virus type 2 isolate 00381/11 polyprotein (POLY) gene, partial cds
MW946509.1	Katzelnick,L., Escoto,A., Huang,A., Garcia-Carreras,B., Chowdhury,N., Berry,I., Chavez,C., Rutvisuttinunt,W., Buchy,P., Duong,V., Dussart,P., Gromowski,G., Macareo,L., Smith,D., Jarman,R., Whitehead,S., Salje,H., Cummings,D., Lessler,J., Melendrez,M., Endy,T., Kalanarooj,S., A-Nuegoonpipat,A., Chanama,S., Sangkijporn,S., Klungthong,C., Thaisomboonsuk,B., Nisalak,A., Gibbons,R., Iamsirithaworn,S.,…	2021-04-23T00:00:00Z	01787/98	Dengue virus	Flavivirus	Flaviviridae	ssRNA(+)	10175	GenBank	partial	0	Thailand	Thailand	Homo sapiens	0	1998	Dengue virus type 2 isolate 01787/98 polyprotein (POLY) gene, partial cds
MW946508.1	Katzelnick,L., Escoto,A., Huang,A., Garcia-Carreras,B., Chowdhury,N., Berry,I., Chavez,C., Rutvisuttinunt,W., Buchy,P., Duong,V., Dussart,P., Gromowski,G., Macareo,L., Smith,D., Jarman,R., Whitehead,S., Salje,H., Cummings,D., Lessler,J., Melendrez,M., Endy,T., Kalanarooj,S., A-Nuegoonpipat,A., Chanama,S., Sangkijporn,S., Klungthong,C., Thaisomboonsuk,B., Nisalak,A., Gibbons,R., Iamsirithaworn,S.,…	2021-04-23T00:00:00Z	06328/98	Dengue virus	Flavivirus	Flaviviridae	ssRNA(+)	10175	GenBank	partial	0	Thailand	Thailand	Homo sapiens	0	1998	Dengue virus type 2 isolate 06328/98 polyprotein (POLY) gene, partial cds
MW946507.1	Katzelnick,L., Escoto,A., Huang,A., Garcia-Carreras,B., Chowdhury,N., Berry,I., Chavez,C., Rutvisuttinunt,W., Buchy,P., Duong,V., Dussart,P., Gromowski,G., Macareo,L., Smith,D., Jarman,R., Whitehead,S., Salje,H., Cummings,D., Lessler,J., Melendrez,M., Endy,T., Kalanarooj,S., A-Nuegoonpipat,A., Chanama,S., Sangkijporn,S., Klungthong,C., Thaisomboonsuk,B., Nisalak,A., Gibbons,R., Iamsirithaworn,S.,…	2021-04-23T00:00:00Z	06341/98	Dengue virus	Flavivirus	Flaviviridae	ssRNA(+)	10175	GenBank	partial	0	Thailand	Thailand	Homo sapiens	0	1998	Dengue virus type 2 isolate 06341/98 polyprotein (POLY) gene, partial cds
MW946506.1	Katzelnick,L., Escoto,A., Huang,A., Garcia-Carreras,B., Chowdhury,N., Berry,I., Chavez,C., Rutvisuttinunt,W., Buchy,P., Duong,V., Dussart,P., Gromowski,G., Macareo,L., Smith,D., Jarman,R., Whitehead,S., Salje,H., Cummings,D., Lessler,J., Melendrez,M., Endy,T., Kalanarooj,S., A-Nuegoonpipat,A., Chanama,S., Sangkijporn,S., Klungthong,C., Thaisomboonsuk,B., Nisalak,A., Gibbons,R., Iamsirithaworn,S.,…	2021-04-23T00:00:00Z	00004/04	Dengue virus	Flavivirus	Flaviviridae	ssRNA(+)	10175	GenBank	partial	0	Thailand	Thailand	Homo sapiens	0	2004	Dengue virus type 2 isolate 00004/04 polyprotein (POLY) gene, partial cds
MW946505.1	Katzelnick,L., Escoto,A., Huang,A., Garcia-Carreras,B., Chowdhury,N., Berry,I., Chavez,C., Rutvisuttinunt,W., Buchy,P., Duong,V., Dussart,P., Gromowski,G., Macareo,L., Smith,D., Jarman,R., Whitehead,S., Salje,H., Cummings,D., Lessler,J., Melendrez,M., Endy,T., Kalanarooj,S., A-Nuegoonpipat,A., Chanama,S., Sangkijporn,S., Klungthong,C., Thaisomboonsuk,B., Nisalak,A., Gibbons,R., Iamsirithaworn,S.,…	2021-04-23T00:00:00Z	01088/95	Dengue virus	Flavivirus	Flaviviridae	ssRNA(+)	10175	GenBank	partial	0	Thailand	Thailand	Homo sapiens	0	1995	Dengue virus type 2 isolate 01088/95 polyprotein (POLY) gene, partial cds
MW946504.1	Katzelnick,L., Escoto,A., Huang,A., Garcia-Carreras,B., Chowdhury,N., Berry,I., Chavez,C., Rutvisuttinunt,W., Buchy,P., Duong,V., Dussart,P., Gromowski,G., Macareo,L., Smith,D., Jarman,R., Whitehead,S., Salje,H., Cummings,D., Lessler,J., Melendrez,M., Endy,T., Kalanarooj,S., A-Nuegoonpipat,A., Chanama,S., Sangkijporn,S., Klungthong,C., Thaisomboonsuk,B., Nisalak,A., Gibbons,R., Iamsirithaworn,S.,…	2021-04-23T00:00:00Z	06650/98	Dengue virus	Flavivirus	Flaviviridae	ssRNA(+)	10175	GenBank	partial	0	Thailand	Thailand	Homo sapiens	0	1998	Dengue virus type 2 isolate 06650/98 polyprotein (POLY) gene, partial cds
MW946503.1	Katzelnick,L., Escoto,A., Huang,A., Garcia-Carreras,B., Chowdhury,N., Berry,I., Chavez,C., Rutvisuttinunt,W., Buchy,P., Duong,V., Dussart,P., Gromowski,G., Macareo,L., Smith,D., Jarman,R., Whitehead,S., Salje,H., Cummings,D., Lessler,J., Melendrez,M., Endy,T., Kalanarooj,S., A-Nuegoonpipat,A., Chanama,S., Sangkijporn,S., Klungthong,C., Thaisomboonsuk,B., Nisalak,A., Gibbons,R., Iamsirithaworn,S.,…	2021-04-23T00:00:00Z	02816/99	Dengue virus	Flavivirus	Flaviviridae	ssRNA(+)	10175	GenBank	partial	0	Thailand	Thailand	Homo sapiens	0	1999	Dengue virus type 2 isolate 02816/99 polyprotein (POLY) gene, partial cds
MW946502.1	Katzelnick,L., Escoto,A., Huang,A., Garcia-Carreras,B., Chowdhury,N., Berry,I., Chavez,C., Rutvisuttinunt,W., Buchy,P., Duong,V., Dussart,P., Gromowski,G., Macareo,L., Smith,D., Jarman,R., Whitehead,S., Salje,H., Cummings,D., Lessler,J., Melendrez,M., Endy,T., Kalanarooj,S., A-Nuegoonpipat,A., Chanama,S., Sangkijporn,S., Klungthong,C., Thaisomboonsuk,B., Nisalak,A., Gibbons,R., Iamsirithaworn,S.,…	2021-04-23T00:00:00Z	02022/00	Dengue virus	Flavivirus	Flaviviridae	ssRNA(+)	10175	GenBank	partial	0	Thailand	Thailand	Homo sapiens	0	2000	Dengue virus type 2 isolate 02022/00 polyprotein (POLY) gene, partial cds
MW946501.1	Katzelnick,L., Escoto,A., Huang,A., Garcia-Carreras,B., Chowdhury,N., Berry,I., Chavez,C., Rutvisuttinunt,W., Buchy,P., Duong,V., Dussart,P., Gromowski,G., Macareo,L., Smith,D., Jarman,R., Whitehead,S., Salje,H., Cummings,D., Lessler,J., Melendrez,M., Endy,T., Kalanarooj,S., A-Nuegoonpipat,A., Chanama,S., Sangkijporn,S., Klungthong,C., Thaisomboonsuk,B., Nisalak,A., Gibbons,R., Iamsirithaworn,S.,…	2021-04-23T00:00:00Z	04156/99	Dengue virus	Flavivirus	Flaviviridae	ssRNA(+)	10175	GenBank	partial	0	Thailand	Thailand	Homo sapiens	0	1999	Dengue virus type 2 isolate 04156/99 polyprotein (POLY) gene, partial cds
MW946500.1	Katzelnick,L., Escoto,A., Huang,A., Garcia-Carreras,B., Chowdhury,N., Berry,I., Chavez,C., Rutvisuttinunt,W., Buchy,P., Duong,V., Dussart,P., Gromowski,G., Macareo,L., Smith,D., Jarman,R., Whitehead,S., Salje,H., Cummings,D., Lessler,J., Melendrez,M., Endy,T., Kalanarooj,S., A-Nuegoonpipat,A., Chanama,S., Sangkijporn,S., Klungthong,C., Thaisomboonsuk,B., Nisalak,A., Gibbons,R., Iamsirithaworn,S.,…	2021-04-23T00:00:00Z	00569/02	Dengue virus	Flavivirus	Flaviviridae	ssRNA(+)	10175	GenBank	partial	0	Thailand	Thailand	Homo sapiens	0	2002	Dengue virus type 2 isolate 00569/02 polyprotein (POLY) gene, partial cds
MW946499.1	Katzelnick,L., Escoto,A., Huang,A., Garcia-Carreras,B., Chowdhury,N., Berry,I., Chavez,C., Rutvisuttinunt,W., Buchy,P., Duong,V., Dussart,P., Gromowski,G., Macareo,L., Smith,D., Jarman,R., Whitehead,S., Salje,H., Cummings,D., Lessler,J., Melendrez,M., Endy,T., Kalanarooj,S., A-Nuegoonpipat,A., Chanama,S., Sangkijporn,S., Klungthong,C., Thaisomboonsuk,B., Nisalak,A., Gibbons,R., Iamsirithaworn,S.,…	2021-04-23T00:00:00Z	00309/95	Dengue virus	Flavivirus	Flaviviridae	ssRNA(+)	10175	GenBank	partial	0	Thailand	Thailand	Homo sapiens	0	1995	Dengue virus type 2 isolate 00309/95 polyprotein (POLY) gene, partial cds
MW946498.1	Katzelnick,L., Escoto,A., Huang,A., Garcia-Carreras,B., Chowdhury,N., Berry,I., Chavez,C., Rutvisuttinunt,W., Buchy,P., Duong,V., Dussart,P., Gromowski,G., Macareo,L., Smith,D., Jarman,R., Whitehead,S., Salje,H., Cummings,D., Lessler,J., Melendrez,M., Endy,T., Kalanarooj,S., A-Nuegoonpipat,A., Chanama,S., Sangkijporn,S., Klungthong,C., Thaisomboonsuk,B., Nisalak,A., Gibbons,R., Iamsirithaworn,S.,…	2021-04-23T00:00:00Z	00285/01	Dengue virus	Flavivirus	Flaviviridae	ssRNA(+)	10175	GenBank	partial	0	Thailand	Thailand	Homo sapiens	0	2001	Dengue virus type 2 isolate 00285/01 polyprotein (POLY) gene, partial cds
MW946497.1	Katzelnick,L., Escoto,A., Huang,A., Garcia-Carreras,B., Chowdhury,N., Berry,I., Chavez,C., Rutvisuttinunt,W., Buchy,P., Duong,V., Dussart,P., Gromowski,G., Macareo,L., Smith,D., Jarman,R., Whitehead,S., Salje,H., Cummings,D., Lessler,J., Melendrez,M., Endy,T., Kalanarooj,S., A-Nuegoonpipat,A., Chanama,S., Sangkijporn,S., Klungthong,C., Thaisomboonsuk,B., Nisalak,A., Gibbons,R., Iamsirithaworn,S.,…	2021-04-23T00:00:00Z	00788/96	Dengue virus	Flavivirus	Flaviviridae	ssRNA(+)	10175	GenBank	partial	0	Thailand	Thailand	Homo sapiens	0	1996	Dengue virus type 2 isolate 00788/96 polyprotein (POLY) gene, partial cds
MW946496.1	Katzelnick,L., Escoto,A., Huang,A., Garcia-Carreras,B., Chowdhury,N., Berry,I., Chavez,C., Rutvisuttinunt,W., Buchy,P., Duong,V., Dussart,P., Gromowski,G., Macareo,L., Smith,D., Jarman,R., Whitehead,S., Salje,H., Cummings,D., Lessler,J., Melendrez,M., Endy,T., Kalanarooj,S., A-Nuegoonpipat,A., Chanama,S., Sangkijporn,S., Klungthong,C., Thaisomboonsuk,B., Nisalak,A., Gibbons,R., Iamsirithaworn,S.,…	2021-04-23T00:00:00Z	00938/07	Dengue virus	Flavivirus	Flaviviridae	ssRNA(+)	10175	GenBank	partial	0	Thailand	Thailand	Homo sapiens	0	2007	Dengue virus type 2 isolate 00938/07 polyprotein (POLY) gene, partial cds
MW946495.1	Katzelnick,L., Escoto,A., Huang,A., Garcia-Carreras,B., Chowdhury,N., Berry,I., Chavez,C., Rutvisuttinunt,W., Buchy,P., Duong,V., Dussart,P., Gromowski,G., Macareo,L., Smith,D., Jarman,R., Whitehead,S., Salje,H., Cummings,D., Lessler,J., Melendrez,M., Endy,T., Kalanarooj,S., A-Nuegoonpipat,A., Chanama,S., Sangkijporn,S., Klungthong,C., Thaisomboonsuk,B., Nisalak,A., Gibbons,R., Iamsirithaworn,S.,…	2021-04-23T00:00:00Z	BID-V571	Dengue virus	Flavivirus	Flaviviridae	ssRNA(+)	10176	GenBank	partial	0	Nicaragua	Nicaragua	Homo sapiens	0	2006	Dengue virus type 2 isolate BID-V571 polyprotein (POLY) gene, complete cds
MW946494.1	Katzelnick,L., Escoto,A., Huang,A., Garcia-Carreras,B., Chowdhury,N., Berry,I., Chavez,C., Rutvisuttinunt,W., Buchy,P., Duong,V., Dussart,P., Gromowski,G., Macareo,L., Smith,D., Jarman,R., Whitehead,S., Salje,H., Cummings,D., Lessler,J., Melendrez,M., Endy,T., Kalanarooj,S., A-Nuegoonpipat,A., Chanama,S., Sangkijporn,S., Klungthong,C., Thaisomboonsuk,B., Nisalak,A., Gibbons,R., Iamsirithaworn,S.,…	2021-04-23T00:00:00Z	00035/03	Dengue virus	Flavivirus	Flaviviridae	ssRNA(+)	10175	GenBank	partial	0	Thailand	Thailand	Homo sapiens	0	2003	Dengue virus type 2 isolate 00035/03 polyprotein (POLY) gene, partial cds
MW946493.1	Katzelnick,L., Escoto,A., Huang,A., Garcia-Carreras,B., Chowdhury,N., Berry,I., Chavez,C., Rutvisuttinunt,W., Buchy,P., Duong,V., Dussart,P., Gromowski,G., Macareo,L., Smith,D., Jarman,R., Whitehead,S., Salje,H., Cummings,D., Lessler,J., Melendrez,M., Endy,T., Kalanarooj,S., A-Nuegoonpipat,A., Chanama,S., Sangkijporn,S., Klungthong,C., Thaisomboonsuk,B., Nisalak,A., Gibbons,R., Iamsirithaworn,S.,…	2021-04-23T00:00:00Z	00496/07	Dengue virus	Flavivirus	Flaviviridae	ssRNA(+)	10175	GenBank	partial	0	Thailand	Thailand	Homo sapiens	0	2007	Dengue virus type 2 isolate 00496/07 polyprotein (POLY) gene, partial cds
MW946492.1	Katzelnick,L., Escoto,A., Huang,A., Garcia-Carreras,B., Chowdhury,N., Berry,I., Chavez,C., Rutvisuttinunt,W., Buchy,P., Duong,V., Dussart,P., Gromowski,G., Macareo,L., Smith,D., Jarman,R., Whitehead,S., Salje,H., Cummings,D., Lessler,J., Melendrez,M., Endy,T., Kalanarooj,S., A-Nuegoonpipat,A., Chanama,S., Sangkijporn,S., Klungthong,C., Thaisomboonsuk,B., Nisalak,A., Gibbons,R., Iamsirithaworn,S.,…	2021-04-23T00:00:00Z	00035/02	Dengue virus	Flavivirus	Flaviviridae	ssRNA(+)	10175	GenBank	partial	0	Thailand	Thailand	Homo sapiens	0	2002	Dengue virus type 2 isolate 00035/02 polyprotein (POLY) gene, partial cds
MW946491.1	Katzelnick,L., Escoto,A., Huang,A., Garcia-Carreras,B., Chowdhury,N., Berry,I., Chavez,C., Rutvisuttinunt,W., Buchy,P., Duong,V., Dussart,P., Gromowski,G., Macareo,L., Smith,D., Jarman,R., Whitehead,S., Salje,H., Cummings,D., Lessler,J., Melendrez,M., Endy,T., Kalanarooj,S., A-Nuegoonpipat,A., Chanama,S., Sangkijporn,S., Klungthong,C., Thaisomboonsuk,B., Nisalak,A., Gibbons,R., Iamsirithaworn,S.,…	2021-04-23T00:00:00Z	00220/11	Dengue virus	Flavivirus	Flaviviridae	ssRNA(+)	10175	GenBank	partial	0	Thailand	Thailand	Homo sapiens	0	2011	Dengue virus type 2 isolate 00220/11 polyprotein (POLY) gene, partial cds
MW946490.1	Katzelnick,L., Escoto,A., Huang,A., Garcia-Carreras,B., Chowdhury,N., Berry,I., Chavez,C., Rutvisuttinunt,W., Buchy,P., Duong,V., Dussart,P., Gromowski,G., Macareo,L., Smith,D., Jarman,R., Whitehead,S., Salje,H., Cummings,D., Lessler,J., Melendrez,M., Endy,T., Kalanarooj,S., A-Nuegoonpipat,A., Chanama,S., Sangkijporn,S., Klungthong,C., Thaisomboonsuk,B., Nisalak,A., Gibbons,R., Iamsirithaworn,S.,…	2021-04-23T00:00:00Z	00742/96	Dengue virus	Flavivirus	Flaviviridae	ssRNA(+)	10175	GenBank	partial	0	Thailand	Thailand	Homo sapiens	0	1996	Dengue virus type 2 isolate 00742/96 polyprotein (POLY) gene, partial cds
MW946489.1	Katzelnick,L., Escoto,A., Huang,A., Garcia-Carreras,B., Chowdhury,N., Berry,I., Chavez,C., Rutvisuttinunt,W., Buchy,P., Duong,V., Dussart,P., Gromowski,G., Macareo,L., Smith,D., Jarman,R., Whitehead,S., Salje,H., Cummings,D., Lessler,J., Melendrez,M., Endy,T., Kalanarooj,S., A-Nuegoonpipat,A., Chanama,S., Sangkijporn,S., Klungthong,C., Thaisomboonsuk,B., Nisalak,A., Gibbons,R., Iamsirithaworn,S.,…	2021-04-23T00:00:00Z	06281/01	Dengue virus	Flavivirus	Flaviviridae	ssRNA(+)	10175	GenBank	partial	0	Thailand	Thailand	Homo sapiens	0	2001	Dengue virus type 2 isolate 06281/01 polyprotein (POLY) gene, partial cds
MW946488.1	Katzelnick,L., Escoto,A., Huang,A., Garcia-Carreras,B., Chowdhury,N., Berry,I., Chavez,C., Rutvisuttinunt,W., Buchy,P., Duong,V., Dussart,P., Gromowski,G., Macareo,L., Smith,D., Jarman,R., Whitehead,S., Salje,H., Cummings,D., Lessler,J., Melendrez,M., Endy,T., Kalanarooj,S., A-Nuegoonpipat,A., Chanama,S., Sangkijporn,S., Klungthong,C., Thaisomboonsuk,B., Nisalak,A., Gibbons,R., Iamsirithaworn,S.,…	2021-04-23T00:00:00Z	03090/02	Dengue virus	Flavivirus	Flaviviridae	ssRNA(+)	10175	GenBank	partial	0	Thailand	Thailand	Homo sapiens	0	2002	Dengue virus type 2 isolate 03090/02 polyprotein (POLY) gene, partial cds
MW946487.1	Katzelnick,L., Escoto,A., Huang,A., Garcia-Carreras,B., Chowdhury,N., Berry,I., Chavez,C., Rutvisuttinunt,W., Buchy,P., Duong,V., Dussart,P., Gromowski,G., Macareo,L., Smith,D., Jarman,R., Whitehead,S., Salje,H., Cummings,D., Lessler,J., Melendrez,M., Endy,T., Kalanarooj,S., A-Nuegoonpipat,A., Chanama,S., Sangkijporn,S., Klungthong,C., Thaisomboonsuk,B., Nisalak,A., Gibbons,R., Iamsirithaworn,S.,…	2021-04-23T00:00:00Z	07035/98	Dengue virus	Flavivirus	Flaviviridae	ssRNA(+)	10175	GenBank	partial	0	Thailand	Thailand	Homo sapiens	0	1998	Dengue virus type 2 isolate 07035/98 polyprotein (POLY) gene, partial cds
MW946486.1	Katzelnick,L., Escoto,A., Huang,A., Garcia-Carreras,B., Chowdhury,N., Berry,I., Chavez,C., Rutvisuttinunt,W., Buchy,P., Duong,V., Dussart,P., Gromowski,G., Macareo,L., Smith,D., Jarman,R., Whitehead,S., Salje,H., Cummings,D., Lessler,J., Melendrez,M., Endy,T., Kalanarooj,S., A-Nuegoonpipat,A., Chanama,S., Sangkijporn,S., Klungthong,C., Thaisomboonsuk,B., Nisalak,A., Gibbons,R., Iamsirithaworn,S.,…	2021-04-23T00:00:00Z	01624/10	Dengue virus	Flavivirus	Flaviviridae	ssRNA(+)	10175	GenBank	partial	0	Thailand	Thailand	Homo sapiens	0	2010	Dengue virus type 2 isolate 01624/10 polyprotein (POLY) gene, partial cds
MW946485.1	Katzelnick,L., Escoto,A., Huang,A., Garcia-Carreras,B., Chowdhury,N., Berry,I., Chavez,C., Rutvisuttinunt,W., Buchy,P., Duong,V., Dussart,P., Gromowski,G., Macareo,L., Smith,D., Jarman,R., Whitehead,S., Salje,H., Cummings,D., Lessler,J., Melendrez,M., Endy,T., Kalanarooj,S., A-Nuegoonpipat,A., Chanama,S., Sangkijporn,S., Klungthong,C., Thaisomboonsuk,B., Nisalak,A., Gibbons,R., Iamsirithaworn,S.,…	2021-04-23T00:00:00Z	00991/95	Dengue virus	Flavivirus	Flaviviridae	ssRNA(+)	10175	GenBank	partial	0	Thailand	Thailand	Homo sapiens	0	1995	Dengue virus type 2 isolate 00991/95 polyprotein (POLY) gene, partial cds
MW946484.1	Katzelnick,L., Escoto,A., Huang,A., Garcia-Carreras,B., Chowdhury,N., Berry,I., Chavez,C., Rutvisuttinunt,W., Buchy,P., Duong,V., Dussart,P., Gromowski,G., Macareo,L., Smith,D., Jarman,R., Whitehead,S., Salje,H., Cummings,D., Lessler,J., Melendrez,M., Endy,T., Kalanarooj,S., A-Nuegoonpipat,A., Chanama,S., Sangkijporn,S., Klungthong,C., Thaisomboonsuk,B., Nisalak,A., Gibbons,R., Iamsirithaworn,S.,…	2021-04-23T00:00:00Z	01431/96	Dengue virus	Flavivirus	Flaviviridae	ssRNA(+)	10175	GenBank	partial	0	Thailand	Thailand	Homo sapiens	0	1996	Dengue virus type 2 isolate 01431/96 polyprotein (POLY) gene, partial cds
MW946483.1	Katzelnick,L., Escoto,A., Huang,A., Garcia-Carreras,B., Chowdhury,N., Berry,I., Chavez,C., Rutvisuttinunt,W., Buchy,P., Duong,V., Dussart,P., Gromowski,G., Macareo,L., Smith,D., Jarman,R., Whitehead,S., Salje,H., Cummings,D., Lessler,J., Melendrez,M., Endy,T., Kalanarooj,S., A-Nuegoonpipat,A., Chanama,S., Sangkijporn,S., Klungthong,C., Thaisomboonsuk,B., Nisalak,A., Gibbons,R., Iamsirithaworn,S.,…	2021-04-23T00:00:00Z	05819/01	Dengue virus	Flavivirus	Flaviviridae	ssRNA(+)	10175	GenBank	partial	0	Thailand	Thailand	Homo sapiens	0	2001	Dengue virus type 2 isolate 05819/01 polyprotein (POLY) gene, partial cds
MW946482.1	Katzelnick,L., Escoto,A., Huang,A., Garcia-Carreras,B., Chowdhury,N., Berry,I., Chavez,C., Rutvisuttinunt,W., Buchy,P., Duong,V., Dussart,P., Gromowski,G., Macareo,L., Smith,D., Jarman,R., Whitehead,S., Salje,H., Cummings,D., Lessler,J., Melendrez,M., Endy,T., Kalanarooj,S., A-Nuegoonpipat,A., Chanama,S., Sangkijporn,S., Klungthong,C., Thaisomboonsuk,B., Nisalak,A., Gibbons,R., Iamsirithaworn,S.,…	2021-04-23T00:00:00Z	00043/96	Dengue virus	Flavivirus	Flaviviridae	ssRNA(+)	10175	GenBank	partial	0	Thailand	Thailand	Homo sapiens	0	1996	Dengue virus type 2 isolate 00043/96 polyprotein (POLY) gene, partial cds
MW946481.1	Katzelnick,L., Escoto,A., Huang,A., Garcia-Carreras,B., Chowdhury,N., Berry,I., Chavez,C., Rutvisuttinunt,W., Buchy,P., Duong,V., Dussart,P., Gromowski,G., Macareo,L., Smith,D., Jarman,R., Whitehead,S., Salje,H., Cummings,D., Lessler,J., Melendrez,M., Endy,T., Kalanarooj,S., A-Nuegoonpipat,A., Chanama,S., Sangkijporn,S., Klungthong,C., Thaisomboonsuk,B., Nisalak,A., Gibbons,R., Iamsirithaworn,S.,…	2021-04-23T00:00:00Z	00017/01	Dengue virus	Flavivirus	Flaviviridae	ssRNA(+)	10175	GenBank	partial	0	Thailand	Thailand	Homo sapiens	0	2001	Dengue virus type 2 isolate 00017/01 polyprotein (POLY) gene, partial cds
MW946480.1	Katzelnick,L., Escoto,A., Huang,A., Garcia-Carreras,B., Chowdhury,N., Berry,I., Chavez,C., Rutvisuttinunt,W., Buchy,P., Duong,V., Dussart,P., Gromowski,G., Macareo,L., Smith,D., Jarman,R., Whitehead,S., Salje,H., Cummings,D., Lessler,J., Melendrez,M., Endy,T., Kalanarooj,S., A-Nuegoonpipat,A., Chanama,S., Sangkijporn,S., Klungthong,C., Thaisomboonsuk,B., Nisalak,A., Gibbons,R., Iamsirithaworn,S.,…	2021-04-23T00:00:00Z	00974/96	Dengue virus	Flavivirus	Flaviviridae	ssRNA(+)	10175	GenBank	partial	0	Thailand	Thailand	Homo sapiens	0	1996	Dengue virus type 2 isolate 00974/96 polyprotein (POLY) gene, partial cds
MW946479.1	Katzelnick,L., Escoto,A., Huang,A., Garcia-Carreras,B., Chowdhury,N., Berry,I., Chavez,C., Rutvisuttinunt,W., Buchy,P., Duong,V., Dussart,P., Gromowski,G., Macareo,L., Smith,D., Jarman,R., Whitehead,S., Salje,H., Cummings,D., Lessler,J., Melendrez,M., Endy,T., Kalanarooj,S., A-Nuegoonpipat,A., Chanama,S., Sangkijporn,S., Klungthong,C., Thaisomboonsuk,B., Nisalak,A., Gibbons,R., Iamsirithaworn,S.,…	2021-04-23T00:00:00Z	00342/12	Dengue virus	Flavivirus	Flaviviridae	ssRNA(+)	10175	GenBank	partial	0	Thailand	Thailand	Homo sapiens	0	2012	Dengue virus type 2 isolate 00342/12 polyprotein (POLY) gene, partial cds
MW946478.1	Katzelnick,L., Escoto,A., Huang,A., Garcia-Carreras,B., Chowdhury,N., Berry,I., Chavez,C., Rutvisuttinunt,W., Buchy,P., Duong,V., Dussart,P., Gromowski,G., Macareo,L., Smith,D., Jarman,R., Whitehead,S., Salje,H., Cummings,D., Lessler,J., Melendrez,M., Endy,T., Kalanarooj,S., A-Nuegoonpipat,A., Chanama,S., Sangkijporn,S., Klungthong,C., Thaisomboonsuk,B., Nisalak,A., Gibbons,R., Iamsirithaworn,S.,…	2021-04-23T00:00:00Z	POONA-742295	Dengue virus	Flavivirus	Flaviviridae	ssRNA(+)	10176	GenBank	partial	0	India	India	Homo sapiens	0	1974	Dengue virus type 2 isolate POONA-742295 polyprotein (POLY) gene, complete cds
MW946477.1	Katzelnick,L., Escoto,A., Huang,A., Garcia-Carreras,B., Chowdhury,N., Berry,I., Chavez,C., Rutvisuttinunt,W., Buchy,P., Duong,V., Dussart,P., Gromowski,G., Macareo,L., Smith,D., Jarman,R., Whitehead,S., Salje,H., Cummings,D., Lessler,J., Melendrez,M., Endy,T., Kalanarooj,S., A-Nuegoonpipat,A., Chanama,S., Sangkijporn,S., Klungthong,C., Thaisomboonsuk,B., Nisalak,A., Gibbons,R., Iamsirithaworn,S.,…	2021-04-23T00:00:00Z	00494/97	Dengue virus	Flavivirus	Flaviviridae	ssRNA(+)	10175	GenBank	partial	0	Thailand	Thailand	Homo sapiens	0	1997	Dengue virus type 2 isolate 00494/97 polyprotein (POLY) gene, partial cds
MW946476.1	Katzelnick,L., Escoto,A., Huang,A., Garcia-Carreras,B., Chowdhury,N., Berry,I., Chavez,C., Rutvisuttinunt,W., Buchy,P., Duong,V., Dussart,P., Gromowski,G., Macareo,L., Smith,D., Jarman,R., Whitehead,S., Salje,H., Cummings,D., Lessler,J., Melendrez,M., Endy,T., Kalanarooj,S., A-Nuegoonpipat,A., Chanama,S., Sangkijporn,S., Klungthong,C., Thaisomboonsuk,B., Nisalak,A., Gibbons,R., Iamsirithaworn,S.,…	2021-04-23T00:00:00Z	04726/98	Dengue virus	Flavivirus	Flaviviridae	ssRNA(+)	10175	GenBank	partial	0	Thailand	Thailand	Homo sapiens	0	1998	Dengue virus type 2 isolate 04726/98 polyprotein (POLY) gene, partial cds
MW946475.1	Katzelnick,L., Escoto,A., Huang,A., Garcia-Carreras,B., Chowdhury,N., Berry,I., Chavez,C., Rutvisuttinunt,W., Buchy,P., Duong,V., Dussart,P., Gromowski,G., Macareo,L., Smith,D., Jarman,R., Whitehead,S., Salje,H., Cummings,D., Lessler,J., Melendrez,M., Endy,T., Kalanarooj,S., A-Nuegoonpipat,A., Chanama,S., Sangkijporn,S., Klungthong,C., Thaisomboonsuk,B., Nisalak,A., Gibbons,R., Iamsirithaworn,S.,…	2021-04-23T00:00:00Z	TONGA-74	Dengue virus	Flavivirus	Flaviviridae	ssRNA(+)	10176	GenBank	partial	0	Tonga	Tonga	Homo sapiens	0	1974	Dengue virus type 2 isolate TONGA-74 polyprotein (POLY) gene, complete cds
MW946474.1	Katzelnick,L., Escoto,A., Huang,A., Garcia-Carreras,B., Chowdhury,N., Berry,I., Chavez,C., Rutvisuttinunt,W., Buchy,P., Duong,V., Dussart,P., Gromowski,G., Macareo,L., Smith,D., Jarman,R., Whitehead,S., Salje,H., Cummings,D., Lessler,J., Melendrez,M., Endy,T., Kalanarooj,S., A-Nuegoonpipat,A., Chanama,S., Sangkijporn,S., Klungthong,C., Thaisomboonsuk,B., Nisalak,A., Gibbons,R., Iamsirithaworn,S.,…	2021-04-23T00:00:00Z	01458/94	Dengue virus	Flavivirus	Flaviviridae	ssRNA(+)	10175	GenBank	partial	0	Thailand	Thailand	Homo sapiens	0	1994	Dengue virus type 2 isolate 01458/94 polyprotein (POLY) gene, partial cds
MW946473.1	Katzelnick,L., Escoto,A., Huang,A., Garcia-Carreras,B., Chowdhury,N., Berry,I., Chavez,C., Rutvisuttinunt,W., Buchy,P., Duong,V., Dussart,P., Gromowski,G., Macareo,L., Smith,D., Jarman,R., Whitehead,S., Salje,H., Cummings,D., Lessler,J., Melendrez,M., Endy,T., Kalanarooj,S., A-Nuegoonpipat,A., Chanama,S., Sangkijporn,S., Klungthong,C., Thaisomboonsuk,B., Nisalak,A., Gibbons,R., Iamsirithaworn,S.,…	2021-04-23T00:00:00Z	00185/99	Dengue virus	Flavivirus	Flaviviridae	ssRNA(+)	10175	GenBank	partial	0	Thailand	Thailand	Homo sapiens	0	1999	Dengue virus type 2 isolate 00185/99 polyprotein (POLY) gene, partial cds
MW946472.1	Katzelnick,L., Escoto,A., Huang,A., Garcia-Carreras,B., Chowdhury,N., Berry,I., Chavez,C., Rutvisuttinunt,W., Buchy,P., Duong,V., Dussart,P., Gromowski,G., Macareo,L., Smith,D., Jarman,R., Whitehead,S., Salje,H., Cummings,D., Lessler,J., Melendrez,M., Endy,T., Kalanarooj,S., A-Nuegoonpipat,A., Chanama,S., Sangkijporn,S., Klungthong,C., Thaisomboonsuk,B., Nisalak,A., Gibbons,R., Iamsirithaworn,S.,…	2021-04-23T00:00:00Z	01707/03	Dengue virus	Flavivirus	Flaviviridae	ssRNA(+)	10175	GenBank	partial	0	Thailand	Thailand	Homo sapiens	0	2003	Dengue virus type 2 isolate 01707/03 polyprotein (POLY) gene, partial cds
MW946471.1	Katzelnick,L., Escoto,A., Huang,A., Garcia-Carreras,B., Chowdhury,N., Berry,I., Chavez,C., Rutvisuttinunt,W., Buchy,P., Duong,V., Dussart,P., Gromowski,G., Macareo,L., Smith,D., Jarman,R., Whitehead,S., Salje,H., Cummings,D., Lessler,J., Melendrez,M., Endy,T., Kalanarooj,S., A-Nuegoonpipat,A., Chanama,S., Sangkijporn,S., Klungthong,C., Thaisomboonsuk,B., Nisalak,A., Gibbons,R., Iamsirithaworn,S.,…	2021-04-23T00:00:00Z	00669/12	Dengue virus	Flavivirus	Flaviviridae	ssRNA(+)	10175	GenBank	partial	0	Thailand	Thailand	Homo sapiens	0	2012	Dengue virus type 2 isolate 00669/12 polyprotein (POLY) gene, partial cds
MW946470.1	Katzelnick,L., Escoto,A., Huang,A., Garcia-Carreras,B., Chowdhury,N., Berry,I., Chavez,C., Rutvisuttinunt,W., Buchy,P., Duong,V., Dussart,P., Gromowski,G., Macareo,L., Smith,D., Jarman,R., Whitehead,S., Salje,H., Cummings,D., Lessler,J., Melendrez,M., Endy,T., Kalanarooj,S., A-Nuegoonpipat,A., Chanama,S., Sangkijporn,S., Klungthong,C., Thaisomboonsuk,B., Nisalak,A., Gibbons,R., Iamsirithaworn,S.,…	2021-04-23T00:00:00Z	00077/00	Dengue virus	Flavivirus	Flaviviridae	ssRNA(+)	10175	GenBank	partial	0	Thailand	Thailand	Homo sapiens	0	2000	Dengue virus type 2 isolate 00077/00 polyprotein (POLY) gene, partial cds
MW946469.1	Katzelnick,L., Escoto,A., Huang,A., Garcia-Carreras,B., Chowdhury,N., Berry,I., Chavez,C., Rutvisuttinunt,W., Buchy,P., Duong,V., Dussart,P., Gromowski,G., Macareo,L., Smith,D., Jarman,R., Whitehead,S., Salje,H., Cummings,D., Lessler,J., Melendrez,M., Endy,T., Kalanarooj,S., A-Nuegoonpipat,A., Chanama,S., Sangkijporn,S., Klungthong,C., Thaisomboonsuk,B., Nisalak,A., Gibbons,R., Iamsirithaworn,S.,…	2021-04-23T00:00:00Z	00523/94	Dengue virus	Flavivirus	Flaviviridae	ssRNA(+)	10175	GenBank	partial	0	Thailand	Thailand	Homo sapiens	0	1994	Dengue virus type 2 isolate 00523/94 polyprotein (POLY) gene, partial cds
MW946468.1	Katzelnick,L., Escoto,A., Huang,A., Garcia-Carreras,B., Chowdhury,N., Berry,I., Chavez,C., Rutvisuttinunt,W., Buchy,P., Duong,V., Dussart,P., Gromowski,G., Macareo,L., Smith,D., Jarman,R., Whitehead,S., Salje,H., Cummings,D., Lessler,J., Melendrez,M., Endy,T., Kalanarooj,S., A-Nuegoonpipat,A., Chanama,S., Sangkijporn,S., Klungthong,C., Thaisomboonsuk,B., Nisalak,A., Gibbons,R., Iamsirithaworn,S.,…	2021-04-23T00:00:00Z	00605/03	Dengue virus	Flavivirus	Flaviviridae	ssRNA(+)	10175	GenBank	partial	0	Thailand	Thailand	Homo sapiens	0	2003	Dengue virus type 2 isolate 00605/03 polyprotein (POLY) gene, partial cds
MW946467.1	Katzelnick,L., Escoto,A., Huang,A., Garcia-Carreras,B., Chowdhury,N., Berry,I., Chavez,C., Rutvisuttinunt,W., Buchy,P., Duong,V., Dussart,P., Gromowski,G., Macareo,L., Smith,D., Jarman,R., Whitehead,S., Salje,H., Cummings,D., Lessler,J., Melendrez,M., Endy,T., Kalanarooj,S., A-Nuegoonpipat,A., Chanama,S., Sangkijporn,S., Klungthong,C., Thaisomboonsuk,B., Nisalak,A., Gibbons,R., Iamsirithaworn,S.,…	2021-04-23T00:00:00Z	07130/97	Dengue virus	Flavivirus	Flaviviridae	ssRNA(+)	10175	GenBank	partial	0	Thailand	Thailand	Homo sapiens	0	1997	Dengue virus type 2 isolate 07130/97 polyprotein (POLY) gene, partial cds
MW946466.1	Katzelnick,L., Escoto,A., Huang,A., Garcia-Carreras,B., Chowdhury,N., Berry,I., Chavez,C., Rutvisuttinunt,W., Buchy,P., Duong,V., Dussart,P., Gromowski,G., Macareo,L., Smith,D., Jarman,R., Whitehead,S., Salje,H., Cummings,D., Lessler,J., Melendrez,M., Endy,T., Kalanarooj,S., A-Nuegoonpipat,A., Chanama,S., Sangkijporn,S., Klungthong,C., Thaisomboonsuk,B., Nisalak,A., Gibbons,R., Iamsirithaworn,S.,…	2021-04-23T00:00:00Z	02322/03	Dengue virus	Flavivirus	Flaviviridae	ssRNA(+)	10175	GenBank	partial	0	Thailand	Thailand	Homo sapiens	0	2003	Dengue virus type 2 isolate 02322/03 polyprotein (POLY) gene, partial cds
MW946465.1	Katzelnick,L., Escoto,A., Huang,A., Garcia-Carreras,B., Chowdhury,N., Berry,I., Chavez,C., Rutvisuttinunt,W., Buchy,P., Duong,V., Dussart,P., Gromowski,G., Macareo,L., Smith,D., Jarman,R., Whitehead,S., Salje,H., Cummings,D., Lessler,J., Melendrez,M., Endy,T., Kalanarooj,S., A-Nuegoonpipat,A., Chanama,S., Sangkijporn,S., Klungthong,C., Thaisomboonsuk,B., Nisalak,A., Gibbons,R., Iamsirithaworn,S.,…	2021-04-23T00:00:00Z	00800/98	Dengue virus	Flavivirus	Flaviviridae	ssRNA(+)	10175	GenBank	partial	0	Thailand	Thailand	Homo sapiens	0	1998	Dengue virus type 2 isolate 00800/98 polyprotein (POLY) gene, partial cds
MW946464.1	Katzelnick,L., Escoto,A., Huang,A., Garcia-Carreras,B., Chowdhury,N., Berry,I., Chavez,C., Rutvisuttinunt,W., Buchy,P., Duong,V., Dussart,P., Gromowski,G., Macareo,L., Smith,D., Jarman,R., Whitehead,S., Salje,H., Cummings,D., Lessler,J., Melendrez,M., Endy,T., Kalanarooj,S., A-Nuegoonpipat,A., Chanama,S., Sangkijporn,S., Klungthong,C., Thaisomboonsuk,B., Nisalak,A., Gibbons,R., Iamsirithaworn,S.,…	2021-04-23T00:00:00Z	00760/97	Dengue virus	Flavivirus	Flaviviridae	ssRNA(+)	10175	GenBank	partial	0	Thailand	Thailand	Homo sapiens	0	1997	Dengue virus type 2 isolate 00760/97 polyprotein (POLY) gene, partial cds
MW946463.1	Katzelnick,L., Escoto,A., Huang,A., Garcia-Carreras,B., Chowdhury,N., Berry,I., Chavez,C., Rutvisuttinunt,W., Buchy,P., Duong,V., Dussart,P., Gromowski,G., Macareo,L., Smith,D., Jarman,R., Whitehead,S., Salje,H., Cummings,D., Lessler,J., Melendrez,M., Endy,T., Kalanarooj,S., A-Nuegoonpipat,A., Chanama,S., Sangkijporn,S., Klungthong,C., Thaisomboonsuk,B., Nisalak,A., Gibbons,R., Iamsirithaworn,S.,…	2021-04-23T00:00:00Z	02119/96	Dengue virus	Flavivirus	Flaviviridae	ssRNA(+)	10175	GenBank	partial	0	Thailand	Thailand	Homo sapiens	0	1996	Dengue virus type 2 isolate 02119/96 polyprotein (POLY) gene, partial cds
MW946462.1	Katzelnick,L., Escoto,A., Huang,A., Garcia-Carreras,B., Chowdhury,N., Berry,I., Chavez,C., Rutvisuttinunt,W., Buchy,P., Duong,V., Dussart,P., Gromowski,G., Macareo,L., Smith,D., Jarman,R., Whitehead,S., Salje,H., Cummings,D., Lessler,J., Melendrez,M., Endy,T., Kalanarooj,S., A-Nuegoonpipat,A., Chanama,S., Sangkijporn,S., Klungthong,C., Thaisomboonsuk,B., Nisalak,A., Gibbons,R., Iamsirithaworn,S.,…	2021-04-23T00:00:00Z	00678/06	Dengue virus	Flavivirus	Flaviviridae	ssRNA(+)	10175	GenBank	partial	0	Thailand	Thailand	Homo sapiens	0	2006	Dengue virus type 2 isolate 00678/06 polyprotein (POLY) gene, partial cds
MW946461.1	Katzelnick,L., Escoto,A., Huang,A., Garcia-Carreras,B., Chowdhury,N., Berry,I., Chavez,C., Rutvisuttinunt,W., Buchy,P., Duong,V., Dussart,P., Gromowski,G., Macareo,L., Smith,D., Jarman,R., Whitehead,S., Salje,H., Cummings,D., Lessler,J., Melendrez,M., Endy,T., Kalanarooj,S., A-Nuegoonpipat,A., Chanama,S., Sangkijporn,S., Klungthong,C., Thaisomboonsuk,B., Nisalak,A., Gibbons,R., Iamsirithaworn,S.,…	2021-04-23T00:00:00Z	05470/88	Dengue virus	Flavivirus	Flaviviridae	ssRNA(+)	10175	GenBank	partial	0	Thailand	Thailand	Homo sapiens	0	1988	Dengue virus type 2 isolate 05470/88 polyprotein (POLY) gene, partial cds
MW946460.1	Katzelnick,L., Escoto,A., Huang,A., Garcia-Carreras,B., Chowdhury,N., Berry,I., Chavez,C., Rutvisuttinunt,W., Buchy,P., Duong,V., Dussart,P., Gromowski,G., Macareo,L., Smith,D., Jarman,R., Whitehead,S., Salje,H., Cummings,D., Lessler,J., Melendrez,M., Endy,T., Kalanarooj,S., A-Nuegoonpipat,A., Chanama,S., Sangkijporn,S., Klungthong,C., Thaisomboonsuk,B., Nisalak,A., Gibbons,R., Iamsirithaworn,S.,…	2021-04-23T00:00:00Z	05925/97	Dengue virus	Flavivirus	Flaviviridae	ssRNA(+)	10175	GenBank	partial	0	Thailand	Thailand	Homo sapiens	0	1997	Dengue virus type 2 isolate 05925/97 polyprotein (POLY) gene, partial cds
MW946459.1	Katzelnick,L., Escoto,A., Huang,A., Garcia-Carreras,B., Chowdhury,N., Berry,I., Chavez,C., Rutvisuttinunt,W., Buchy,P., Duong,V., Dussart,P., Gromowski,G., Macareo,L., Smith,D., Jarman,R., Whitehead,S., Salje,H., Cummings,D., Lessler,J., Melendrez,M., Endy,T., Kalanarooj,S., A-Nuegoonpipat,A., Chanama,S., Sangkijporn,S., Klungthong,C., Thaisomboonsuk,B., Nisalak,A., Gibbons,R., Iamsirithaworn,S.,…	2021-04-23T00:00:00Z	01726/07	Dengue virus	Flavivirus	Flaviviridae	ssRNA(+)	10175	GenBank	partial	0	Thailand	Thailand	Homo sapiens	0	2007	Dengue virus type 2 isolate 01726/07 polyprotein (POLY) gene, partial cds
MW946458.1	Katzelnick,L., Escoto,A., Huang,A., Garcia-Carreras,B., Chowdhury,N., Berry,I., Chavez,C., Rutvisuttinunt,W., Buchy,P., Duong,V., Dussart,P., Gromowski,G., Macareo,L., Smith,D., Jarman,R., Whitehead,S., Salje,H., Cummings,D., Lessler,J., Melendrez,M., Endy,T., Kalanarooj,S., A-Nuegoonpipat,A., Chanama,S., Sangkijporn,S., Klungthong,C., Thaisomboonsuk,B., Nisalak,A., Gibbons,R., Iamsirithaworn,S.,…	2021-04-23T00:00:00Z	00606/11	Dengue virus	Flavivirus	Flaviviridae	ssRNA(+)	10175	GenBank	partial	0	Thailand	Thailand	Homo sapiens	0	2011	Dengue virus type 2 isolate 00606/11 polyprotein (POLY) gene, partial cds
MW946457.1	Katzelnick,L., Escoto,A., Huang,A., Garcia-Carreras,B., Chowdhury,N., Berry,I., Chavez,C., Rutvisuttinunt,W., Buchy,P., Duong,V., Dussart,P., Gromowski,G., Macareo,L., Smith,D., Jarman,R., Whitehead,S., Salje,H., Cummings,D., Lessler,J., Melendrez,M., Endy,T., Kalanarooj,S., A-Nuegoonpipat,A., Chanama,S., Sangkijporn,S., Klungthong,C., Thaisomboonsuk,B., Nisalak,A., Gibbons,R., Iamsirithaworn,S.,…	2021-04-23T00:00:00Z	05512/99	Dengue virus	Flavivirus	Flaviviridae	ssRNA(+)	10175	GenBank	partial	0	Thailand	Thailand	Homo sapiens	0	1999	Dengue virus type 2 isolate 05512/99 polyprotein (POLY) gene, partial cds
MW946456.1	Katzelnick,L., Escoto,A., Huang,A., Garcia-Carreras,B., Chowdhury,N., Berry,I., Chavez,C., Rutvisuttinunt,W., Buchy,P., Duong,V., Dussart,P., Gromowski,G., Macareo,L., Smith,D., Jarman,R., Whitehead,S., Salje,H., Cummings,D., Lessler,J., Melendrez,M., Endy,T., Kalanarooj,S., A-Nuegoonpipat,A., Chanama,S., Sangkijporn,S., Klungthong,C., Thaisomboonsuk,B., Nisalak,A., Gibbons,R., Iamsirithaworn,S.,…	2021-04-23T00:00:00Z	04834/01	Dengue virus	Flavivirus	Flaviviridae	ssRNA(+)	10175	GenBank	partial	0	Thailand	Thailand	Homo sapiens	0	2001	Dengue virus type 2 isolate 04834/01 polyprotein (POLY) gene, partial cds
MW946455.1	Katzelnick,L., Escoto,A., Huang,A., Garcia-Carreras,B., Chowdhury,N., Berry,I., Chavez,C., Rutvisuttinunt,W., Buchy,P., Duong,V., Dussart,P., Gromowski,G., Macareo,L., Smith,D., Jarman,R., Whitehead,S., Salje,H., Cummings,D., Lessler,J., Melendrez,M., Endy,T., Kalanarooj,S., A-Nuegoonpipat,A., Chanama,S., Sangkijporn,S., Klungthong,C., Thaisomboonsuk,B., Nisalak,A., Gibbons,R., Iamsirithaworn,S.,…	2021-04-23T00:00:00Z	05107/97	Dengue virus	Flavivirus	Flaviviridae	ssRNA(+)	10175	GenBank	partial	0	Thailand	Thailand	Homo sapiens	0	1997	Dengue virus type 2 isolate 05107/97 polyprotein (POLY) gene, partial cds
MW946454.1	Katzelnick,L., Escoto,A., Huang,A., Garcia-Carreras,B., Chowdhury,N., Berry,I., Chavez,C., Rutvisuttinunt,W., Buchy,P., Duong,V., Dussart,P., Gromowski,G., Macareo,L., Smith,D., Jarman,R., Whitehead,S., Salje,H., Cummings,D., Lessler,J., Melendrez,M., Endy,T., Kalanarooj,S., A-Nuegoonpipat,A., Chanama,S., Sangkijporn,S., Klungthong,C., Thaisomboonsuk,B., Nisalak,A., Gibbons,R., Iamsirithaworn,S.,…	2021-04-23T00:00:00Z	00024/96	Dengue virus	Flavivirus	Flaviviridae	ssRNA(+)	10175	GenBank	partial	0	Thailand	Thailand	Homo sapiens	0	1996	Dengue virus type 2 isolate 00024/96 polyprotein (POLY) gene, partial cds
MW946453.1	Katzelnick,L., Escoto,A., Huang,A., Garcia-Carreras,B., Chowdhury,N., Berry,I., Chavez,C., Rutvisuttinunt,W., Buchy,P., Duong,V., Dussart,P., Gromowski,G., Macareo,L., Smith,D., Jarman,R., Whitehead,S., Salje,H., Cummings,D., Lessler,J., Melendrez,M., Endy,T., Kalanarooj,S., A-Nuegoonpipat,A., Chanama,S., Sangkijporn,S., Klungthong,C., Thaisomboonsuk,B., Nisalak,A., Gibbons,R., Iamsirithaworn,S.,…	2021-04-23T00:00:00Z	00721/01	Dengue virus	Flavivirus	Flaviviridae	ssRNA(+)	10175	GenBank	partial	0	Thailand	Thailand	Homo sapiens	0	2001	Dengue virus type 2 isolate 00721/01 polyprotein (POLY) gene, partial cds
MW946452.1	Katzelnick,L., Escoto,A., Huang,A., Garcia-Carreras,B., Chowdhury,N., Berry,I., Chavez,C., Rutvisuttinunt,W., Buchy,P., Duong,V., Dussart,P., Gromowski,G., Macareo,L., Smith,D., Jarman,R., Whitehead,S., Salje,H., Cummings,D., Lessler,J., Melendrez,M., Endy,T., Kalanarooj,S., A-Nuegoonpipat,A., Chanama,S., Sangkijporn,S., Klungthong,C., Thaisomboonsuk,B., Nisalak,A., Gibbons,R., Iamsirithaworn,S.,…	2021-04-23T00:00:00Z	03042/98	Dengue virus	Flavivirus	Flaviviridae	ssRNA(+)	10175	GenBank	partial	0	Thailand	Thailand	Homo sapiens	0	1998	Dengue virus type 2 isolate 03042/98 polyprotein (POLY) gene, partial cds
MW946451.1	Katzelnick,L., Escoto,A., Huang,A., Garcia-Carreras,B., Chowdhury,N., Berry,I., Chavez,C., Rutvisuttinunt,W., Buchy,P., Duong,V., Dussart,P., Gromowski,G., Macareo,L., Smith,D., Jarman,R., Whitehead,S., Salje,H., Cummings,D., Lessler,J., Melendrez,M., Endy,T., Kalanarooj,S., A-Nuegoonpipat,A., Chanama,S., Sangkijporn,S., Klungthong,C., Thaisomboonsuk,B., Nisalak,A., Gibbons,R., Iamsirithaworn,S.,…	2021-04-23T00:00:00Z	05492/00	Dengue virus	Flavivirus	Flaviviridae	ssRNA(+)	10175	GenBank	partial	0	Thailand	Thailand	Homo sapiens	0	2000	Dengue virus type 2 isolate 05492/00 polyprotein (POLY) gene, partial cds
MW946450.1	Katzelnick,L., Escoto,A., Huang,A., Garcia-Carreras,B., Chowdhury,N., Berry,I., Chavez,C., Rutvisuttinunt,W., Buchy,P., Duong,V., Dussart,P., Gromowski,G., Macareo,L., Smith,D., Jarman,R., Whitehead,S., Salje,H., Cummings,D., Lessler,J., Melendrez,M., Endy,T., Kalanarooj,S., A-Nuegoonpipat,A., Chanama,S., Sangkijporn,S., Klungthong,C., Thaisomboonsuk,B., Nisalak,A., Gibbons,R., Iamsirithaworn,S.,…	2021-04-23T00:00:00Z	01497/94	Dengue virus	Flavivirus	Flaviviridae	ssRNA(+)	10175	GenBank	partial	0	Thailand	Thailand	Homo sapiens	0	1994	Dengue virus type 2 isolate 01497/94 polyprotein (POLY) gene, partial cds
MW946449.1	Katzelnick,L., Escoto,A., Huang,A., Garcia-Carreras,B., Chowdhury,N., Berry,I., Chavez,C., Rutvisuttinunt,W., Buchy,P., Duong,V., Dussart,P., Gromowski,G., Macareo,L., Smith,D., Jarman,R., Whitehead,S., Salje,H., Cummings,D., Lessler,J., Melendrez,M., Endy,T., Kalanarooj,S., A-Nuegoonpipat,A., Chanama,S., Sangkijporn,S., Klungthong,C., Thaisomboonsuk,B., Nisalak,A., Gibbons,R., Iamsirithaworn,S.,…	2021-04-23T00:00:00Z	00740/14	Dengue virus	Flavivirus	Flaviviridae	ssRNA(+)	10175	GenBank	partial	0	Thailand	Thailand	Homo sapiens	0	2014	Dengue virus type 2 isolate 00740/14 polyprotein (POLY) gene, partial cds
MW946448.1	Katzelnick,L., Escoto,A., Huang,A., Garcia-Carreras,B., Chowdhury,N., Berry,I., Chavez,C., Rutvisuttinunt,W., Buchy,P., Duong,V., Dussart,P., Gromowski,G., Macareo,L., Smith,D., Jarman,R., Whitehead,S., Salje,H., Cummings,D., Lessler,J., Melendrez,M., Endy,T., Kalanarooj,S., A-Nuegoonpipat,A., Chanama,S., Sangkijporn,S., Klungthong,C., Thaisomboonsuk,B., Nisalak,A., Gibbons,R., Iamsirithaworn,S.,…	2021-04-23T00:00:00Z	01594/05	Dengue virus	Flavivirus	Flaviviridae	ssRNA(+)	10175	GenBank	partial	0	Thailand	Thailand	Homo sapiens	0	2005	Dengue virus type 2 isolate 01594/05 polyprotein (POLY) gene, partial cds
MW946447.1	Katzelnick,L., Escoto,A., Huang,A., Garcia-Carreras,B., Chowdhury,N., Berry,I., Chavez,C., Rutvisuttinunt,W., Buchy,P., Duong,V., Dussart,P., Gromowski,G., Macareo,L., Smith,D., Jarman,R., Whitehead,S., Salje,H., Cummings,D., Lessler,J., Melendrez,M., Endy,T., Kalanarooj,S., A-Nuegoonpipat,A., Chanama,S., Sangkijporn,S., Klungthong,C., Thaisomboonsuk,B., Nisalak,A., Gibbons,R., Iamsirithaworn,S.,…	2021-04-23T00:00:00Z	05511/00	Dengue virus	Flavivirus	Flaviviridae	ssRNA(+)	10175	GenBank	partial	0	Thailand	Thailand	Homo sapiens	0	2000	Dengue virus type 2 isolate 05511/00 polyprotein (POLY) gene, partial cds
MW946446.1	Katzelnick,L., Escoto,A., Huang,A., Garcia-Carreras,B., Chowdhury,N., Berry,I., Chavez,C., Rutvisuttinunt,W., Buchy,P., Duong,V., Dussart,P., Gromowski,G., Macareo,L., Smith,D., Jarman,R., Whitehead,S., Salje,H., Cummings,D., Lessler,J., Melendrez,M., Endy,T., Kalanarooj,S., A-Nuegoonpipat,A., Chanama,S., Sangkijporn,S., Klungthong,C., Thaisomboonsuk,B., Nisalak,A., Gibbons,R., Iamsirithaworn,S.,…	2021-04-23T00:00:00Z	01940/96	Dengue virus	Flavivirus	Flaviviridae	ssRNA(+)	10175	GenBank	partial	0	Thailand	Thailand	Homo sapiens	0	1996	Dengue virus type 2 isolate 01940/96 polyprotein (POLY) gene, partial cds
MW946445.1	Katzelnick,L., Escoto,A., Huang,A., Garcia-Carreras,B., Chowdhury,N., Berry,I., Chavez,C., Rutvisuttinunt,W., Buchy,P., Duong,V., Dussart,P., Gromowski,G., Macareo,L., Smith,D., Jarman,R., Whitehead,S., Salje,H., Cummings,D., Lessler,J., Melendrez,M., Endy,T., Kalanarooj,S., A-Nuegoonpipat,A., Chanama,S., Sangkijporn,S., Klungthong,C., Thaisomboonsuk,B., Nisalak,A., Gibbons,R., Iamsirithaworn,S.,…	2021-04-23T00:00:00Z	04177/99	Dengue virus	Flavivirus	Flaviviridae	ssRNA(+)	10175	GenBank	partial	0	Thailand	Thailand	Homo sapiens	0	1999	Dengue virus type 2 isolate 04177/99 polyprotein (POLY) gene, partial cds
MW946444.1	Katzelnick,L., Escoto,A., Huang,A., Garcia-Carreras,B., Chowdhury,N., Berry,I., Chavez,C., Rutvisuttinunt,W., Buchy,P., Duong,V., Dussart,P., Gromowski,G., Macareo,L., Smith,D., Jarman,R., Whitehead,S., Salje,H., Cummings,D., Lessler,J., Melendrez,M., Endy,T., Kalanarooj,S., A-Nuegoonpipat,A., Chanama,S., Sangkijporn,S., Klungthong,C., Thaisomboonsuk,B., Nisalak,A., Gibbons,R., Iamsirithaworn,S.,…	2021-04-23T00:00:00Z	CAREC-00-08221	Dengue virus	Flavivirus	Flaviviridae	ssRNA(+)	10176	GenBank	partial	0	Guyana	Guyana	Homo sapiens	0	2000	Dengue virus type 2 isolate CAREC-00-08221 polyprotein (POLY) gene, complete cds
MW946443.1	Katzelnick,L., Escoto,A., Huang,A., Garcia-Carreras,B., Chowdhury,N., Berry,I., Chavez,C., Rutvisuttinunt,W., Buchy,P., Duong,V., Dussart,P., Gromowski,G., Macareo,L., Smith,D., Jarman,R., Whitehead,S., Salje,H., Cummings,D., Lessler,J., Melendrez,M., Endy,T., Kalanarooj,S., A-Nuegoonpipat,A., Chanama,S., Sangkijporn,S., Klungthong,C., Thaisomboonsuk,B., Nisalak,A., Gibbons,R., Iamsirithaworn,S.,…	2021-04-23T00:00:00Z	01550/98	Dengue virus	Flavivirus	Flaviviridae	ssRNA(+)	10175	GenBank	partial	0	Thailand	Thailand	Homo sapiens	0	1998	Dengue virus type 2 isolate 01550/98 polyprotein (POLY) gene, partial cds
MW946442.1	Katzelnick,L., Escoto,A., Huang,A., Garcia-Carreras,B., Chowdhury,N., Berry,I., Chavez,C., Rutvisuttinunt,W., Buchy,P., Duong,V., Dussart,P., Gromowski,G., Macareo,L., Smith,D., Jarman,R., Whitehead,S., Salje,H., Cummings,D., Lessler,J., Melendrez,M., Endy,T., Kalanarooj,S., A-Nuegoonpipat,A., Chanama,S., Sangkijporn,S., Klungthong,C., Thaisomboonsuk,B., Nisalak,A., Gibbons,R., Iamsirithaworn,S.,…	2021-04-23T00:00:00Z	01549/10	Dengue virus	Flavivirus	Flaviviridae	ssRNA(+)	10175	GenBank	partial	0	Thailand	Thailand	Homo sapiens	0	2010	Dengue virus type 2 isolate 01549/10 polyprotein (POLY) gene, partial cds
MW946441.1	Katzelnick,L., Escoto,A., Huang,A., Garcia-Carreras,B., Chowdhury,N., Berry,I., Chavez,C., Rutvisuttinunt,W., Buchy,P., Duong,V., Dussart,P., Gromowski,G., Macareo,L., Smith,D., Jarman,R., Whitehead,S., Salje,H., Cummings,D., Lessler,J., Melendrez,M., Endy,T., Kalanarooj,S., A-Nuegoonpipat,A., Chanama,S., Sangkijporn,S., Klungthong,C., Thaisomboonsuk,B., Nisalak,A., Gibbons,R., Iamsirithaworn,S.,…	2021-04-23T00:00:00Z	02339/03	Dengue virus	Flavivirus	Flaviviridae	ssRNA(+)	10175	GenBank	partial	0	Thailand	Thailand	Homo sapiens	0	2003	Dengue virus type 2 isolate 02339/03 polyprotein (POLY) gene, partial cds
MW946440.1	Katzelnick,L., Escoto,A., Huang,A., Garcia-Carreras,B., Chowdhury,N., Berry,I., Chavez,C., Rutvisuttinunt,W., Buchy,P., Duong,V., Dussart,P., Gromowski,G., Macareo,L., Smith,D., Jarman,R., Whitehead,S., Salje,H., Cummings,D., Lessler,J., Melendrez,M., Endy,T., Kalanarooj,S., A-Nuegoonpipat,A., Chanama,S., Sangkijporn,S., Klungthong,C., Thaisomboonsuk,B., Nisalak,A., Gibbons,R., Iamsirithaworn,S.,…	2021-04-23T00:00:00Z	00672/98	Dengue virus	Flavivirus	Flaviviridae	ssRNA(+)	10175	GenBank	partial	0	Thailand	Thailand	Homo sapiens	0	1998	Dengue virus type 2 isolate 00672/98 polyprotein (POLY) gene, partial cds
MW946439.1	Katzelnick,L., Escoto,A., Huang,A., Garcia-Carreras,B., Chowdhury,N., Berry,I., Chavez,C., Rutvisuttinunt,W., Buchy,P., Duong,V., Dussart,P., Gromowski,G., Macareo,L., Smith,D., Jarman,R., Whitehead,S., Salje,H., Cummings,D., Lessler,J., Melendrez,M., Endy,T., Kalanarooj,S., A-Nuegoonpipat,A., Chanama,S., Sangkijporn,S., Klungthong,C., Thaisomboonsuk,B., Nisalak,A., Gibbons,R., Iamsirithaworn,S.,…	2021-04-23T00:00:00Z	00774/97	Dengue virus	Flavivirus	Flaviviridae	ssRNA(+)	10175	GenBank	partial	0	Thailand	Thailand	Homo sapiens	0	1997	Dengue virus type 2 isolate 00774/97 polyprotein (POLY) gene, partial cds
MW946438.1	Katzelnick,L., Escoto,A., Huang,A., Garcia-Carreras,B., Chowdhury,N., Berry,I., Chavez,C., Rutvisuttinunt,W., Buchy,P., Duong,V., Dussart,P., Gromowski,G., Macareo,L., Smith,D., Jarman,R., Whitehead,S., Salje,H., Cummings,D., Lessler,J., Melendrez,M., Endy,T., Kalanarooj,S., A-Nuegoonpipat,A., Chanama,S., Sangkijporn,S., Klungthong,C., Thaisomboonsuk,B., Nisalak,A., Gibbons,R., Iamsirithaworn,S.,…	2021-04-23T00:00:00Z	03921/01	Dengue virus	Flavivirus	Flaviviridae	ssRNA(+)	10175	GenBank	partial	0	Thailand	Thailand	Homo sapiens	0	2001	Dengue virus type 2 isolate 03921/01 polyprotein (POLY) gene, partial cds
MW946437.1	Katzelnick,L., Escoto,A., Huang,A., Garcia-Carreras,B., Chowdhury,N., Berry,I., Chavez,C., Rutvisuttinunt,W., Buchy,P., Duong,V., Dussart,P., Gromowski,G., Macareo,L., Smith,D., Jarman,R., Whitehead,S., Salje,H., Cummings,D., Lessler,J., Melendrez,M., Endy,T., Kalanarooj,S., A-Nuegoonpipat,A., Chanama,S., Sangkijporn,S., Klungthong,C., Thaisomboonsuk,B., Nisalak,A., Gibbons,R., Iamsirithaworn,S.,…	2021-04-23T00:00:00Z	00647/11	Dengue virus	Flavivirus	Flaviviridae	ssRNA(+)	10175	GenBank	partial	0	Thailand	Thailand	Homo sapiens	0	2011	Dengue virus type 2 isolate 00647/11 polyprotein (POLY) gene, partial cds
MW946436.1	Katzelnick,L., Escoto,A., Huang,A., Garcia-Carreras,B., Chowdhury,N., Berry,I., Chavez,C., Rutvisuttinunt,W., Buchy,P., Duong,V., Dussart,P., Gromowski,G., Macareo,L., Smith,D., Jarman,R., Whitehead,S., Salje,H., Cummings,D., Lessler,J., Melendrez,M., Endy,T., Kalanarooj,S., A-Nuegoonpipat,A., Chanama,S., Sangkijporn,S., Klungthong,C., Thaisomboonsuk,B., Nisalak,A., Gibbons,R., Iamsirithaworn,S.,…	2021-04-23T00:00:00Z	02164/00	Dengue virus	Flavivirus	Flaviviridae	ssRNA(+)	10175	GenBank	partial	0	Thailand	Thailand	Homo sapiens	0	2000	Dengue virus type 2 isolate 02164/00 polyprotein (POLY) gene, partial cds
MW946435.1	Katzelnick,L., Escoto,A., Huang,A., Garcia-Carreras,B., Chowdhury,N., Berry,I., Chavez,C., Rutvisuttinunt,W., Buchy,P., Duong,V., Dussart,P., Gromowski,G., Macareo,L., Smith,D., Jarman,R., Whitehead,S., Salje,H., Cummings,D., Lessler,J., Melendrez,M., Endy,T., Kalanarooj,S., A-Nuegoonpipat,A., Chanama,S., Sangkijporn,S., Klungthong,C., Thaisomboonsuk,B., Nisalak,A., Gibbons,R., Iamsirithaworn,S.,…	2021-04-23T00:00:00Z	00273/12	Dengue virus	Flavivirus	Flaviviridae	ssRNA(+)	10175	GenBank	partial	0	Thailand	Thailand	Homo sapiens	0	2012	Dengue virus type 2 isolate 00273/12 polyprotein (POLY) gene, partial cds
MW946434.1	Katzelnick,L., Escoto,A., Huang,A., Garcia-Carreras,B., Chowdhury,N., Berry,I., Chavez,C., Rutvisuttinunt,W., Buchy,P., Duong,V., Dussart,P., Gromowski,G., Macareo,L., Smith,D., Jarman,R., Whitehead,S., Salje,H., Cummings,D., Lessler,J., Melendrez,M., Endy,T., Kalanarooj,S., A-Nuegoonpipat,A., Chanama,S., Sangkijporn,S., Klungthong,C., Thaisomboonsuk,B., Nisalak,A., Gibbons,R., Iamsirithaworn,S.,…	2021-04-23T00:00:00Z	01249/00	Dengue virus	Flavivirus	Flaviviridae	ssRNA(+)	10175	GenBank	partial	0	Thailand	Thailand	Homo sapiens	0	2000	Dengue virus type 2 isolate 01249/00 polyprotein (POLY) gene, partial cds
MW946433.1	Katzelnick,L., Escoto,A., Huang,A., Garcia-Carreras,B., Chowdhury,N., Berry,I., Chavez,C., Rutvisuttinunt,W., Buchy,P., Duong,V., Dussart,P., Gromowski,G., Macareo,L., Smith,D., Jarman,R., Whitehead,S., Salje,H., Cummings,D., Lessler,J., Melendrez,M., Endy,T., Kalanarooj,S., A-Nuegoonpipat,A., Chanama,S., Sangkijporn,S., Klungthong,C., Thaisomboonsuk,B., Nisalak,A., Gibbons,R., Iamsirithaworn,S.,…	2021-04-23T00:00:00Z	00408/07	Dengue virus	Flavivirus	Flaviviridae	ssRNA(+)	10175	GenBank	partial	0	Thailand	Thailand	Homo sapiens	0	2007	Dengue virus type 2 isolate 00408/07 polyprotein (POLY) gene, partial cds
MW946432.1	Katzelnick,L., Escoto,A., Huang,A., Garcia-Carreras,B., Chowdhury,N., Berry,I., Chavez,C., Rutvisuttinunt,W., Buchy,P., Duong,V., Dussart,P., Gromowski,G., Macareo,L., Smith,D., Jarman,R., Whitehead,S., Salje,H., Cummings,D., Lessler,J., Melendrez,M., Endy,T., Kalanarooj,S., A-Nuegoonpipat,A., Chanama,S., Sangkijporn,S., Klungthong,C., Thaisomboonsuk,B., Nisalak,A., Gibbons,R., Iamsirithaworn,S.,…	2021-04-23T00:00:00Z	00295/98	Dengue virus	Flavivirus	Flaviviridae	ssRNA(+)	10175	GenBank	partial	0	Thailand	Thailand	Homo sapiens	0	1998	Dengue virus type 2 isolate 00295/98 polyprotein (POLY) gene, partial cds
MW946431.1	Katzelnick,L., Escoto,A., Huang,A., Garcia-Carreras,B., Chowdhury,N., Berry,I., Chavez,C., Rutvisuttinunt,W., Buchy,P., Duong,V., Dussart,P., Gromowski,G., Macareo,L., Smith,D., Jarman,R., Whitehead,S., Salje,H., Cummings,D., Lessler,J., Melendrez,M., Endy,T., Kalanarooj,S., A-Nuegoonpipat,A., Chanama,S., Sangkijporn,S., Klungthong,C., Thaisomboonsuk,B., Nisalak,A., Gibbons,R., Iamsirithaworn,S.,…	2021-04-23T00:00:00Z	00741/12	Dengue virus	Flavivirus	Flaviviridae	ssRNA(+)	10175	GenBank	partial	0	Thailand	Thailand	Homo sapiens	0	2012	Dengue virus type 2 isolate 00741/12 polyprotein (POLY) gene, partial cds
MW946430.1	Katzelnick,L., Escoto,A., Huang,A., Garcia-Carreras,B., Chowdhury,N., Berry,I., Chavez,C., Rutvisuttinunt,W., Buchy,P., Duong,V., Dussart,P., Gromowski,G., Macareo,L., Smith,D., Jarman,R., Whitehead,S., Salje,H., Cummings,D., Lessler,J., Melendrez,M., Endy,T., Kalanarooj,S., A-Nuegoonpipat,A., Chanama,S., Sangkijporn,S., Klungthong,C., Thaisomboonsuk,B., Nisalak,A., Gibbons,R., Iamsirithaworn,S.,…	2021-04-23T00:00:00Z	01381/05	Dengue virus	Flavivirus	Flaviviridae	ssRNA(+)	10175	GenBank	partial	0	Thailand	Thailand	Homo sapiens	0	2005	Dengue virus type 2 isolate 01381/05 polyprotein (POLY) gene, partial cds
MW946429.1	Katzelnick,L., Escoto,A., Huang,A., Garcia-Carreras,B., Chowdhury,N., Berry,I., Chavez,C., Rutvisuttinunt,W., Buchy,P., Duong,V., Dussart,P., Gromowski,G., Macareo,L., Smith,D., Jarman,R., Whitehead,S., Salje,H., Cummings,D., Lessler,J., Melendrez,M., Endy,T., Kalanarooj,S., A-Nuegoonpipat,A., Chanama,S., Sangkijporn,S., Klungthong,C., Thaisomboonsuk,B., Nisalak,A., Gibbons,R., Iamsirithaworn,S.,…	2021-04-23T00:00:00Z	06834/01	Dengue virus	Flavivirus	Flaviviridae	ssRNA(+)	10175	GenBank	partial	0	Thailand	Thailand	Homo sapiens	0	2001	Dengue virus type 2 isolate 06834/01 polyprotein (POLY) gene, partial cds
MW946428.1	Katzelnick,L., Escoto,A., Huang,A., Garcia-Carreras,B., Chowdhury,N., Berry,I., Chavez,C., Rutvisuttinunt,W., Buchy,P., Duong,V., Dussart,P., Gromowski,G., Macareo,L., Smith,D., Jarman,R., Whitehead,S., Salje,H., Cummings,D., Lessler,J., Melendrez,M., Endy,T., Kalanarooj,S., A-Nuegoonpipat,A., Chanama,S., Sangkijporn,S., Klungthong,C., Thaisomboonsuk,B., Nisalak,A., Gibbons,R., Iamsirithaworn,S.,…	2021-04-23T00:00:00Z	03876/01	Dengue virus	Flavivirus	Flaviviridae	ssRNA(+)	10175	GenBank	partial	0	Thailand	Thailand	Homo sapiens	0	2001	Dengue virus type 2 isolate 03876/01 polyprotein (POLY) gene, partial cds
MW946427.1	Katzelnick,L., Escoto,A., Huang,A., Garcia-Carreras,B., Chowdhury,N., Berry,I., Chavez,C., Rutvisuttinunt,W., Buchy,P., Duong,V., Dussart,P., Gromowski,G., Macareo,L., Smith,D., Jarman,R., Whitehead,S., Salje,H., Cummings,D., Lessler,J., Melendrez,M., Endy,T., Kalanarooj,S., A-Nuegoonpipat,A., Chanama,S., Sangkijporn,S., Klungthong,C., Thaisomboonsuk,B., Nisalak,A., Gibbons,R., Iamsirithaworn,S.,…	2021-04-23T00:00:00Z	04897/01	Dengue virus	Flavivirus	Flaviviridae	ssRNA(+)	10175	GenBank	partial	0	Thailand	Thailand	Homo sapiens	0	2001	Dengue virus type 2 isolate 04897/01 polyprotein (POLY) gene, partial cds
MW946426.1	Katzelnick,L., Escoto,A., Huang,A., Garcia-Carreras,B., Chowdhury,N., Berry,I., Chavez,C., Rutvisuttinunt,W., Buchy,P., Duong,V., Dussart,P., Gromowski,G., Macareo,L., Smith,D., Jarman,R., Whitehead,S., Salje,H., Cummings,D., Lessler,J., Melendrez,M., Endy,T., Kalanarooj,S., A-Nuegoonpipat,A., Chanama,S., Sangkijporn,S., Klungthong,C., Thaisomboonsuk,B., Nisalak,A., Gibbons,R., Iamsirithaworn,S.,…	2021-04-23T00:00:00Z	00333/00	Dengue virus	Flavivirus	Flaviviridae	ssRNA(+)	10175	GenBank	partial	0	Thailand	Thailand	Homo sapiens	0	2000	Dengue virus type 2 isolate 00333/00 polyprotein (POLY) gene, partial cds
MW946425.1	Katzelnick,L., Escoto,A., Huang,A., Garcia-Carreras,B., Chowdhury,N., Berry,I., Chavez,C., Rutvisuttinunt,W., Buchy,P., Duong,V., Dussart,P., Gromowski,G., Macareo,L., Smith,D., Jarman,R., Whitehead,S., Salje,H., Cummings,D., Lessler,J., Melendrez,M., Endy,T., Kalanarooj,S., A-Nuegoonpipat,A., Chanama,S., Sangkijporn,S., Klungthong,C., Thaisomboonsuk,B., Nisalak,A., Gibbons,R., Iamsirithaworn,S.,…	2021-04-23T00:00:00Z	00997/94	Dengue virus	Flavivirus	Flaviviridae	ssRNA(+)	10175	GenBank	partial	0	Thailand	Thailand	Homo sapiens	0	1994	Dengue virus type 2 isolate 00997/94 polyprotein (POLY) gene, partial cds
MW946424.1	Katzelnick,L., Escoto,A., Huang,A., Garcia-Carreras,B., Chowdhury,N., Berry,I., Chavez,C., Rutvisuttinunt,W., Buchy,P., Duong,V., Dussart,P., Gromowski,G., Macareo,L., Smith,D., Jarman,R., Whitehead,S., Salje,H., Cummings,D., Lessler,J., Melendrez,M., Endy,T., Kalanarooj,S., A-Nuegoonpipat,A., Chanama,S., Sangkijporn,S., Klungthong,C., Thaisomboonsuk,B., Nisalak,A., Gibbons,R., Iamsirithaworn,S.,…	2021-04-23T00:00:00Z	02195/07	Dengue virus	Flavivirus	Flaviviridae	ssRNA(+)	10175	GenBank	partial	0	Thailand	Thailand	Homo sapiens	0	2007	Dengue virus type 2 isolate 02195/07 polyprotein (POLY) gene, partial cds
MW946423.1	Katzelnick,L., Escoto,A., Huang,A., Garcia-Carreras,B., Chowdhury,N., Berry,I., Chavez,C., Rutvisuttinunt,W., Buchy,P., Duong,V., Dussart,P., Gromowski,G., Macareo,L., Smith,D., Jarman,R., Whitehead,S., Salje,H., Cummings,D., Lessler,J., Melendrez,M., Endy,T., Kalanarooj,S., A-Nuegoonpipat,A., Chanama,S., Sangkijporn,S., Klungthong,C., Thaisomboonsuk,B., Nisalak,A., Gibbons,R., Iamsirithaworn,S.,…	2021-04-23T00:00:00Z	03993/01	Dengue virus	Flavivirus	Flaviviridae	ssRNA(+)	10175	GenBank	partial	0	Thailand	Thailand	Homo sapiens	0	2001	Dengue virus type 2 isolate 03993/01 polyprotein (POLY) gene, partial cds
MW946422.1	Katzelnick,L., Escoto,A., Huang,A., Garcia-Carreras,B., Chowdhury,N., Berry,I., Chavez,C., Rutvisuttinunt,W., Buchy,P., Duong,V., Dussart,P., Gromowski,G., Macareo,L., Smith,D., Jarman,R., Whitehead,S., Salje,H., Cummings,D., Lessler,J., Melendrez,M., Endy,T., Kalanarooj,S., A-Nuegoonpipat,A., Chanama,S., Sangkijporn,S., Klungthong,C., Thaisomboonsuk,B., Nisalak,A., Gibbons,R., Iamsirithaworn,S.,…	2021-04-23T00:00:00Z	01034/94	Dengue virus	Flavivirus	Flaviviridae	ssRNA(+)	10175	GenBank	partial	0	Thailand	Thailand	Homo sapiens	0	1994	Dengue virus type 2 isolate 01034/94 polyprotein (POLY) gene, partial cds
MW946421.1	Katzelnick,L., Escoto,A., Huang,A., Garcia-Carreras,B., Chowdhury,N., Berry,I., Chavez,C., Rutvisuttinunt,W., Buchy,P., Duong,V., Dussart,P., Gromowski,G., Macareo,L., Smith,D., Jarman,R., Whitehead,S., Salje,H., Cummings,D., Lessler,J., Melendrez,M., Endy,T., Kalanarooj,S., A-Nuegoonpipat,A., Chanama,S., Sangkijporn,S., Klungthong,C., Thaisomboonsuk,B., Nisalak,A., Gibbons,R., Iamsirithaworn,S.,…	2021-04-23T00:00:00Z	03600/01	Dengue virus	Flavivirus	Flaviviridae	ssRNA(+)	10175	GenBank	partial	0	Thailand	Thailand	Homo sapiens	0	2001	Dengue virus type 2 isolate 03600/01 polyprotein (POLY) gene, partial cds
MW946420.1	Katzelnick,L., Escoto,A., Huang,A., Garcia-Carreras,B., Chowdhury,N., Berry,I., Chavez,C., Rutvisuttinunt,W., Buchy,P., Duong,V., Dussart,P., Gromowski,G., Macareo,L., Smith,D., Jarman,R., Whitehead,S., Salje,H., Cummings,D., Lessler,J., Melendrez,M., Endy,T., Kalanarooj,S., A-Nuegoonpipat,A., Chanama,S., Sangkijporn,S., Klungthong,C., Thaisomboonsuk,B., Nisalak,A., Gibbons,R., Iamsirithaworn,S.,…	2021-04-23T00:00:00Z	01816/96	Dengue virus	Flavivirus	Flaviviridae	ssRNA(+)	10175	GenBank	partial	0	Thailand	Thailand	Homo sapiens	0	1996	Dengue virus type 2 isolate 01816/96 polyprotein (POLY) gene, partial cds
MW946419.1	Katzelnick,L., Escoto,A., Huang,A., Garcia-Carreras,B., Chowdhury,N., Berry,I., Chavez,C., Rutvisuttinunt,W., Buchy,P., Duong,V., Dussart,P., Gromowski,G., Macareo,L., Smith,D., Jarman,R., Whitehead,S., Salje,H., Cummings,D., Lessler,J., Melendrez,M., Endy,T., Kalanarooj,S., A-Nuegoonpipat,A., Chanama,S., Sangkijporn,S., Klungthong,C., Thaisomboonsuk,B., Nisalak,A., Gibbons,R., Iamsirithaworn,S.,…	2021-04-23T00:00:00Z	02199/96	Dengue virus	Flavivirus	Flaviviridae	ssRNA(+)	10175	GenBank	partial	0	Thailand	Thailand	Homo sapiens	0	1996	Dengue virus type 2 isolate 02199/96 polyprotein (POLY) gene, partial cds
MW946418.1	Katzelnick,L., Escoto,A., Huang,A., Garcia-Carreras,B., Chowdhury,N., Berry,I., Chavez,C., Rutvisuttinunt,W., Buchy,P., Duong,V., Dussart,P., Gromowski,G., Macareo,L., Smith,D., Jarman,R., Whitehead,S., Salje,H., Cummings,D., Lessler,J., Melendrez,M., Endy,T., Kalanarooj,S., A-Nuegoonpipat,A., Chanama,S., Sangkijporn,S., Klungthong,C., Thaisomboonsuk,B., Nisalak,A., Gibbons,R., Iamsirithaworn,S.,…	2021-04-23T00:00:00Z	01024/02	Dengue virus	Flavivirus	Flaviviridae	ssRNA(+)	10175	GenBank	partial	0	Thailand	Thailand	Homo sapiens	0	2002	Dengue virus type 2 isolate 01024/02 polyprotein (POLY) gene, partial cds
MW946417.1	Katzelnick,L., Escoto,A., Huang,A., Garcia-Carreras,B., Chowdhury,N., Berry,I., Chavez,C., Rutvisuttinunt,W., Buchy,P., Duong,V., Dussart,P., Gromowski,G., Macareo,L., Smith,D., Jarman,R., Whitehead,S., Salje,H., Cummings,D., Lessler,J., Melendrez,M., Endy,T., Kalanarooj,S., A-Nuegoonpipat,A., Chanama,S., Sangkijporn,S., Klungthong,C., Thaisomboonsuk,B., Nisalak,A., Gibbons,R., Iamsirithaworn,S.,…	2021-04-23T00:00:00Z	03060/97	Dengue virus	Flavivirus	Flaviviridae	ssRNA(+)	10175	GenBank	partial	0	Thailand	Thailand	Homo sapiens	0	1997	Dengue virus type 2 isolate 03060/97 polyprotein (POLY) gene, partial cds
MW946416.1	Katzelnick,L., Escoto,A., Huang,A., Garcia-Carreras,B., Chowdhury,N., Berry,I., Chavez,C., Rutvisuttinunt,W., Buchy,P., Duong,V., Dussart,P., Gromowski,G., Macareo,L., Smith,D., Jarman,R., Whitehead,S., Salje,H., Cummings,D., Lessler,J., Melendrez,M., Endy,T., Kalanarooj,S., A-Nuegoonpipat,A., Chanama,S., Sangkijporn,S., Klungthong,C., Thaisomboonsuk,B., Nisalak,A., Gibbons,R., Iamsirithaworn,S.,…	2021-04-23T00:00:00Z	00227/03	Dengue virus	Flavivirus	Flaviviridae	ssRNA(+)	10175	GenBank	partial	0	Thailand	Thailand	Homo sapiens	0	2003	Dengue virus type 2 isolate 00227/03 polyprotein (POLY) gene, partial cds
MW946415.1	Katzelnick,L., Escoto,A., Huang,A., Garcia-Carreras,B., Chowdhury,N., Berry,I., Chavez,C., Rutvisuttinunt,W., Buchy,P., Duong,V., Dussart,P., Gromowski,G., Macareo,L., Smith,D., Jarman,R., Whitehead,S., Salje,H., Cummings,D., Lessler,J., Melendrez,M., Endy,T., Kalanarooj,S., A-Nuegoonpipat,A., Chanama,S., Sangkijporn,S., Klungthong,C., Thaisomboonsuk,B., Nisalak,A., Gibbons,R., Iamsirithaworn,S.,…	2021-04-23T00:00:00Z	00009/12	Dengue virus	Flavivirus	Flaviviridae	ssRNA(+)	10175	GenBank	partial	0	Thailand	Thailand	Homo sapiens	0	2012	Dengue virus type 2 isolate 00009/12 polyprotein (POLY) gene, partial cds
MW946414.1	Katzelnick,L., Escoto,A., Huang,A., Garcia-Carreras,B., Chowdhury,N., Berry,I., Chavez,C., Rutvisuttinunt,W., Buchy,P., Duong,V., Dussart,P., Gromowski,G., Macareo,L., Smith,D., Jarman,R., Whitehead,S., Salje,H., Cummings,D., Lessler,J., Melendrez,M., Endy,T., Kalanarooj,S., A-Nuegoonpipat,A., Chanama,S., Sangkijporn,S., Klungthong,C., Thaisomboonsuk,B., Nisalak,A., Gibbons,R., Iamsirithaworn,S.,…	2021-04-23T00:00:00Z	01268/03	Dengue virus	Flavivirus	Flaviviridae	ssRNA(+)	10175	GenBank	partial	0	Thailand	Thailand	Homo sapiens	0	2003	Dengue virus type 2 isolate 01268/03 polyprotein (POLY) gene, partial cds
MW946413.1	Katzelnick,L., Escoto,A., Huang,A., Garcia-Carreras,B., Chowdhury,N., Berry,I., Chavez,C., Rutvisuttinunt,W., Buchy,P., Duong,V., Dussart,P., Gromowski,G., Macareo,L., Smith,D., Jarman,R., Whitehead,S., Salje,H., Cummings,D., Lessler,J., Melendrez,M., Endy,T., Kalanarooj,S., A-Nuegoonpipat,A., Chanama,S., Sangkijporn,S., Klungthong,C., Thaisomboonsuk,B., Nisalak,A., Gibbons,R., Iamsirithaworn,S.,…	2021-04-23T00:00:00Z	01534/05	Dengue virus	Flavivirus	Flaviviridae	ssRNA(+)	10175	GenBank	partial	0	Thailand	Thailand	Homo sapiens	0	2005	Dengue virus type 2 isolate 01534/05 polyprotein (POLY) gene, partial cds
MW946412.1	Katzelnick,L., Escoto,A., Huang,A., Garcia-Carreras,B., Chowdhury,N., Berry,I., Chavez,C., Rutvisuttinunt,W., Buchy,P., Duong,V., Dussart,P., Gromowski,G., Macareo,L., Smith,D., Jarman,R., Whitehead,S., Salje,H., Cummings,D., Lessler,J., Melendrez,M., Endy,T., Kalanarooj,S., A-Nuegoonpipat,A., Chanama,S., Sangkijporn,S., Klungthong,C., Thaisomboonsuk,B., Nisalak,A., Gibbons,R., Iamsirithaworn,S.,…	2021-04-23T00:00:00Z	00327/94	Dengue virus	Flavivirus	Flaviviridae	ssRNA(+)	10175	GenBank	partial	0	Thailand	Thailand	Homo sapiens	0	1994	Dengue virus type 2 isolate 00327/94 polyprotein (POLY) gene, partial cds
MW946411.1	Katzelnick,L., Escoto,A., Huang,A., Garcia-Carreras,B., Chowdhury,N., Berry,I., Chavez,C., Rutvisuttinunt,W., Buchy,P., Duong,V., Dussart,P., Gromowski,G., Macareo,L., Smith,D., Jarman,R., Whitehead,S., Salje,H., Cummings,D., Lessler,J., Melendrez,M., Endy,T., Kalanarooj,S., A-Nuegoonpipat,A., Chanama,S., Sangkijporn,S., Klungthong,C., Thaisomboonsuk,B., Nisalak,A., Gibbons,R., Iamsirithaworn,S.,…	2021-04-23T00:00:00Z	02561/96	Dengue virus	Flavivirus	Flaviviridae	ssRNA(+)	10175	GenBank	partial	0	Thailand	Thailand	Homo sapiens	0	1996	Dengue virus type 2 isolate 02561/96 polyprotein (POLY) gene, partial cds
MW946410.1	Katzelnick,L., Escoto,A., Huang,A., Garcia-Carreras,B., Chowdhury,N., Berry,I., Chavez,C., Rutvisuttinunt,W., Buchy,P., Duong,V., Dussart,P., Gromowski,G., Macareo,L., Smith,D., Jarman,R., Whitehead,S., Salje,H., Cummings,D., Lessler,J., Melendrez,M., Endy,T., Kalanarooj,S., A-Nuegoonpipat,A., Chanama,S., Sangkijporn,S., Klungthong,C., Thaisomboonsuk,B., Nisalak,A., Gibbons,R., Iamsirithaworn,S.,…	2021-04-23T00:00:00Z	06814/98	Dengue virus	Flavivirus	Flaviviridae	ssRNA(+)	10175	GenBank	partial	0	Thailand	Thailand	Homo sapiens	0	1998	Dengue virus type 2 isolate 06814/98 polyprotein (POLY) gene, partial cds
MW946409.1	Katzelnick,L., Escoto,A., Huang,A., Garcia-Carreras,B., Chowdhury,N., Berry,I., Chavez,C., Rutvisuttinunt,W., Buchy,P., Duong,V., Dussart,P., Gromowski,G., Macareo,L., Smith,D., Jarman,R., Whitehead,S., Salje,H., Cummings,D., Lessler,J., Melendrez,M., Endy,T., Kalanarooj,S., A-Nuegoonpipat,A., Chanama,S., Sangkijporn,S., Klungthong,C., Thaisomboonsuk,B., Nisalak,A., Gibbons,R., Iamsirithaworn,S.,…	2021-04-23T00:00:00Z	04031/99	Dengue virus	Flavivirus	Flaviviridae	ssRNA(+)	10175	GenBank	partial	0	Thailand	Thailand	Homo sapiens	0	1999	Dengue virus type 2 isolate 04031/99 polyprotein (POLY) gene, partial cds
MW946408.1	Katzelnick,L., Escoto,A., Huang,A., Garcia-Carreras,B., Chowdhury,N., Berry,I., Chavez,C., Rutvisuttinunt,W., Buchy,P., Duong,V., Dussart,P., Gromowski,G., Macareo,L., Smith,D., Jarman,R., Whitehead,S., Salje,H., Cummings,D., Lessler,J., Melendrez,M., Endy,T., Kalanarooj,S., A-Nuegoonpipat,A., Chanama,S., Sangkijporn,S., Klungthong,C., Thaisomboonsuk,B., Nisalak,A., Gibbons,R., Iamsirithaworn,S.,…	2021-04-23T00:00:00Z	01261/95	Dengue virus	Flavivirus	Flaviviridae	ssRNA(+)	10175	GenBank	partial	0	Thailand	Thailand	Homo sapiens	0	1995	Dengue virus type 2 isolate 01261/95 polyprotein (POLY) gene, partial cds
MW946407.1	Katzelnick,L., Escoto,A., Huang,A., Garcia-Carreras,B., Chowdhury,N., Berry,I., Chavez,C., Rutvisuttinunt,W., Buchy,P., Duong,V., Dussart,P., Gromowski,G., Macareo,L., Smith,D., Jarman,R., Whitehead,S., Salje,H., Cummings,D., Lessler,J., Melendrez,M., Endy,T., Kalanarooj,S., A-Nuegoonpipat,A., Chanama,S., Sangkijporn,S., Klungthong,C., Thaisomboonsuk,B., Nisalak,A., Gibbons,R., Iamsirithaworn,S.,…	2021-04-23T00:00:00Z	00074/02	Dengue virus	Flavivirus	Flaviviridae	ssRNA(+)	10175	GenBank	partial	0	Thailand	Thailand	Homo sapiens	0	2002	Dengue virus type 2 isolate 00074/02 polyprotein (POLY) gene, partial cds
MW946406.1	Katzelnick,L., Escoto,A., Huang,A., Garcia-Carreras,B., Chowdhury,N., Berry,I., Chavez,C., Rutvisuttinunt,W., Buchy,P., Duong,V., Dussart,P., Gromowski,G., Macareo,L., Smith,D., Jarman,R., Whitehead,S., Salje,H., Cummings,D., Lessler,J., Melendrez,M., Endy,T., Kalanarooj,S., A-Nuegoonpipat,A., Chanama,S., Sangkijporn,S., Klungthong,C., Thaisomboonsuk,B., Nisalak,A., Gibbons,R., Iamsirithaworn,S.,…	2021-04-23T00:00:00Z	01496/07	Dengue virus	Flavivirus	Flaviviridae	ssRNA(+)	10175	GenBank	partial	0	Thailand	Thailand	Homo sapiens	0	2007	Dengue virus type 2 isolate 01496/07 polyprotein (POLY) gene, partial cds
MW946405.1	Katzelnick,L., Escoto,A., Huang,A., Garcia-Carreras,B., Chowdhury,N., Berry,I., Chavez,C., Rutvisuttinunt,W., Buchy,P., Duong,V., Dussart,P., Gromowski,G., Macareo,L., Smith,D., Jarman,R., Whitehead,S., Salje,H., Cummings,D., Lessler,J., Melendrez,M., Endy,T., Kalanarooj,S., A-Nuegoonpipat,A., Chanama,S., Sangkijporn,S., Klungthong,C., Thaisomboonsuk,B., Nisalak,A., Gibbons,R., Iamsirithaworn,S.,…	2021-04-23T00:00:00Z	00280/13	Dengue virus	Flavivirus	Flaviviridae	ssRNA(+)	10175	GenBank	partial	0	Thailand	Thailand	Homo sapiens	0	2013	Dengue virus type 2 isolate 00280/13 polyprotein (POLY) gene, partial cds
MW946404.1	Katzelnick,L., Escoto,A., Huang,A., Garcia-Carreras,B., Chowdhury,N., Berry,I., Chavez,C., Rutvisuttinunt,W., Buchy,P., Duong,V., Dussart,P., Gromowski,G., Macareo,L., Smith,D., Jarman,R., Whitehead,S., Salje,H., Cummings,D., Lessler,J., Melendrez,M., Endy,T., Kalanarooj,S., A-Nuegoonpipat,A., Chanama,S., Sangkijporn,S., Klungthong,C., Thaisomboonsuk,B., Nisalak,A., Gibbons,R., Iamsirithaworn,S.,…	2021-04-23T00:00:00Z	02617/06	Dengue virus	Flavivirus	Flaviviridae	ssRNA(+)	10175	GenBank	partial	0	Thailand	Thailand	Homo sapiens	0	2006	Dengue virus type 2 isolate 02617/06 polyprotein (POLY) gene, partial cds
MW946403.1	Katzelnick,L., Escoto,A., Huang,A., Garcia-Carreras,B., Chowdhury,N., Berry,I., Chavez,C., Rutvisuttinunt,W., Buchy,P., Duong,V., Dussart,P., Gromowski,G., Macareo,L., Smith,D., Jarman,R., Whitehead,S., Salje,H., Cummings,D., Lessler,J., Melendrez,M., Endy,T., Kalanarooj,S., A-Nuegoonpipat,A., Chanama,S., Sangkijporn,S., Klungthong,C., Thaisomboonsuk,B., Nisalak,A., Gibbons,R., Iamsirithaworn,S.,…	2021-04-23T00:00:00Z	00193/01	Dengue virus	Flavivirus	Flaviviridae	ssRNA(+)	10175	GenBank	partial	0	Thailand	Thailand	Homo sapiens	0	2001	Dengue virus type 2 isolate 00193/01 polyprotein (POLY) gene, partial cds
MW946402.1	Katzelnick,L., Escoto,A., Huang,A., Garcia-Carreras,B., Chowdhury,N., Berry,I., Chavez,C., Rutvisuttinunt,W., Buchy,P., Duong,V., Dussart,P., Gromowski,G., Macareo,L., Smith,D., Jarman,R., Whitehead,S., Salje,H., Cummings,D., Lessler,J., Melendrez,M., Endy,T., Kalanarooj,S., A-Nuegoonpipat,A., Chanama,S., Sangkijporn,S., Klungthong,C., Thaisomboonsuk,B., Nisalak,A., Gibbons,R., Iamsirithaworn,S.,…	2021-04-23T00:00:00Z	01182/96	Dengue virus	Flavivirus	Flaviviridae	ssRNA(+)	10175	GenBank	partial	0	Thailand	Thailand	Homo sapiens	0	1996	Dengue virus type 2 isolate 01182/96 polyprotein (POLY) gene, partial cds
MW946401.1	Katzelnick,L., Escoto,A., Huang,A., Garcia-Carreras,B., Chowdhury,N., Berry,I., Chavez,C., Rutvisuttinunt,W., Buchy,P., Duong,V., Dussart,P., Gromowski,G., Macareo,L., Smith,D., Jarman,R., Whitehead,S., Salje,H., Cummings,D., Lessler,J., Melendrez,M., Endy,T., Kalanarooj,S., A-Nuegoonpipat,A., Chanama,S., Sangkijporn,S., Klungthong,C., Thaisomboonsuk,B., Nisalak,A., Gibbons,R., Iamsirithaworn,S.,…	2021-04-23T00:00:00Z	06060/00	Dengue virus	Flavivirus	Flaviviridae	ssRNA(+)	10175	GenBank	partial	0	Thailand	Thailand	Homo sapiens	0	2000	Dengue virus type 2 isolate 06060/00 polyprotein (POLY) gene, partial cds
MW946400.1	Katzelnick,L., Escoto,A., Huang,A., Garcia-Carreras,B., Chowdhury,N., Berry,I., Chavez,C., Rutvisuttinunt,W., Buchy,P., Duong,V., Dussart,P., Gromowski,G., Macareo,L., Smith,D., Jarman,R., Whitehead,S., Salje,H., Cummings,D., Lessler,J., Melendrez,M., Endy,T., Kalanarooj,S., A-Nuegoonpipat,A., Chanama,S., Sangkijporn,S., Klungthong,C., Thaisomboonsuk,B., Nisalak,A., Gibbons,R., Iamsirithaworn,S.,…	2021-04-23T00:00:00Z	00376/12	Dengue virus	Flavivirus	Flaviviridae	ssRNA(+)	10175	GenBank	partial	0	Thailand	Thailand	Homo sapiens	0	2012	Dengue virus type 2 isolate 00376/12 polyprotein (POLY) gene, partial cds
MW946399.1	Katzelnick,L., Escoto,A., Huang,A., Garcia-Carreras,B., Chowdhury,N., Berry,I., Chavez,C., Rutvisuttinunt,W., Buchy,P., Duong,V., Dussart,P., Gromowski,G., Macareo,L., Smith,D., Jarman,R., Whitehead,S., Salje,H., Cummings,D., Lessler,J., Melendrez,M., Endy,T., Kalanarooj,S., A-Nuegoonpipat,A., Chanama,S., Sangkijporn,S., Klungthong,C., Thaisomboonsuk,B., Nisalak,A., Gibbons,R., Iamsirithaworn,S.,…	2021-04-23T00:00:00Z	06036/97	Dengue virus	Flavivirus	Flaviviridae	ssRNA(+)	10175	GenBank	partial	0	Thailand	Thailand	Homo sapiens	0	1997	Dengue virus type 2 isolate 06036/97 polyprotein (POLY) gene, partial cds
MW946398.1	Katzelnick,L., Escoto,A., Huang,A., Garcia-Carreras,B., Chowdhury,N., Berry,I., Chavez,C., Rutvisuttinunt,W., Buchy,P., Duong,V., Dussart,P., Gromowski,G., Macareo,L., Smith,D., Jarman,R., Whitehead,S., Salje,H., Cummings,D., Lessler,J., Melendrez,M., Endy,T., Kalanarooj,S., A-Nuegoonpipat,A., Chanama,S., Sangkijporn,S., Klungthong,C., Thaisomboonsuk,B., Nisalak,A., Gibbons,R., Iamsirithaworn,S.,…	2021-04-23T00:00:00Z	01549/03	Dengue virus	Flavivirus	Flaviviridae	ssRNA(+)	10175	GenBank	partial	0	Thailand	Thailand	Homo sapiens	0	2003	Dengue virus type 2 isolate 01549/03 polyprotein (POLY) gene, partial cds
MW946397.1	Katzelnick,L., Escoto,A., Huang,A., Garcia-Carreras,B., Chowdhury,N., Berry,I., Chavez,C., Rutvisuttinunt,W., Buchy,P., Duong,V., Dussart,P., Gromowski,G., Macareo,L., Smith,D., Jarman,R., Whitehead,S., Salje,H., Cummings,D., Lessler,J., Melendrez,M., Endy,T., Kalanarooj,S., A-Nuegoonpipat,A., Chanama,S., Sangkijporn,S., Klungthong,C., Thaisomboonsuk,B., Nisalak,A., Gibbons,R., Iamsirithaworn,S.,…	2021-04-23T00:00:00Z	00322/11	Dengue virus	Flavivirus	Flaviviridae	ssRNA(+)	10175	GenBank	partial	0	Thailand	Thailand	Homo sapiens	0	2011	Dengue virus type 2 isolate 00322/11 polyprotein (POLY) gene, partial cds
MW946396.1	Katzelnick,L., Escoto,A., Huang,A., Garcia-Carreras,B., Chowdhury,N., Berry,I., Chavez,C., Rutvisuttinunt,W., Buchy,P., Duong,V., Dussart,P., Gromowski,G., Macareo,L., Smith,D., Jarman,R., Whitehead,S., Salje,H., Cummings,D., Lessler,J., Melendrez,M., Endy,T., Kalanarooj,S., A-Nuegoonpipat,A., Chanama,S., Sangkijporn,S., Klungthong,C., Thaisomboonsuk,B., Nisalak,A., Gibbons,R., Iamsirithaworn,S.,…	2021-04-23T00:00:00Z	01006/04	Dengue virus	Flavivirus	Flaviviridae	ssRNA(+)	10175	GenBank	partial	0	Thailand	Thailand	Homo sapiens	0	2004	Dengue virus type 2 isolate 01006/04 polyprotein (POLY) gene, partial cds
MW946395.1	Katzelnick,L., Escoto,A., Huang,A., Garcia-Carreras,B., Chowdhury,N., Berry,I., Chavez,C., Rutvisuttinunt,W., Buchy,P., Duong,V., Dussart,P., Gromowski,G., Macareo,L., Smith,D., Jarman,R., Whitehead,S., Salje,H., Cummings,D., Lessler,J., Melendrez,M., Endy,T., Kalanarooj,S., A-Nuegoonpipat,A., Chanama,S., Sangkijporn,S., Klungthong,C., Thaisomboonsuk,B., Nisalak,A., Gibbons,R., Iamsirithaworn,S.,…	2021-04-23T00:00:00Z	02365/03	Dengue virus	Flavivirus	Flaviviridae	ssRNA(+)	10175	GenBank	partial	0	Thailand	Thailand	Homo sapiens	0	2003	Dengue virus type 2 isolate 02365/03 polyprotein (POLY) gene, partial cds
MW946394.1	Katzelnick,L., Escoto,A., Huang,A., Garcia-Carreras,B., Chowdhury,N., Berry,I., Chavez,C., Rutvisuttinunt,W., Buchy,P., Duong,V., Dussart,P., Gromowski,G., Macareo,L., Smith,D., Jarman,R., Whitehead,S., Salje,H., Cummings,D., Lessler,J., Melendrez,M., Endy,T., Kalanarooj,S., A-Nuegoonpipat,A., Chanama,S., Sangkijporn,S., Klungthong,C., Thaisomboonsuk,B., Nisalak,A., Gibbons,R., Iamsirithaworn,S.,…	2021-04-23T00:00:00Z	01414/94	Dengue virus	Flavivirus	Flaviviridae	ssRNA(+)	10175	GenBank	partial	0	Thailand	Thailand	Homo sapiens	0	1994	Dengue virus type 2 isolate 01414/94 polyprotein (POLY) gene, partial cds
MW946393.1	Katzelnick,L., Escoto,A., Huang,A., Garcia-Carreras,B., Chowdhury,N., Berry,I., Chavez,C., Rutvisuttinunt,W., Buchy,P., Duong,V., Dussart,P., Gromowski,G., Macareo,L., Smith,D., Jarman,R., Whitehead,S., Salje,H., Cummings,D., Lessler,J., Melendrez,M., Endy,T., Kalanarooj,S., A-Nuegoonpipat,A., Chanama,S., Sangkijporn,S., Klungthong,C., Thaisomboonsuk,B., Nisalak,A., Gibbons,R., Iamsirithaworn,S.,…	2021-04-23T00:00:00Z	00612/94	Dengue virus	Flavivirus	Flaviviridae	ssRNA(+)	10175	GenBank	partial	0	Thailand	Thailand	Homo sapiens	0	1994	Dengue virus type 2 isolate 00612/94 polyprotein (POLY) gene, partial cds
MW946392.1	Katzelnick,L., Escoto,A., Huang,A., Garcia-Carreras,B., Chowdhury,N., Berry,I., Chavez,C., Rutvisuttinunt,W., Buchy,P., Duong,V., Dussart,P., Gromowski,G., Macareo,L., Smith,D., Jarman,R., Whitehead,S., Salje,H., Cummings,D., Lessler,J., Melendrez,M., Endy,T., Kalanarooj,S., A-Nuegoonpipat,A., Chanama,S., Sangkijporn,S., Klungthong,C., Thaisomboonsuk,B., Nisalak,A., Gibbons,R., Iamsirithaworn,S.,…	2021-04-23T00:00:00Z	01441/05	Dengue virus	Flavivirus	Flaviviridae	ssRNA(+)	10175	GenBank	partial	0	Thailand	Thailand	Homo sapiens	0	2005	Dengue virus type 2 isolate 01441/05 polyprotein (POLY) gene, partial cds
MW946391.1	Katzelnick,L., Escoto,A., Huang,A., Garcia-Carreras,B., Chowdhury,N., Berry,I., Chavez,C., Rutvisuttinunt,W., Buchy,P., Duong,V., Dussart,P., Gromowski,G., Macareo,L., Smith,D., Jarman,R., Whitehead,S., Salje,H., Cummings,D., Lessler,J., Melendrez,M., Endy,T., Kalanarooj,S., A-Nuegoonpipat,A., Chanama,S., Sangkijporn,S., Klungthong,C., Thaisomboonsuk,B., Nisalak,A., Gibbons,R., Iamsirithaworn,S.,…	2021-04-23T00:00:00Z	00449/03	Dengue virus	Flavivirus	Flaviviridae	ssRNA(+)	10175	GenBank	partial	0	Thailand	Thailand	Homo sapiens	0	2003	Dengue virus type 2 isolate 00449/03 polyprotein (POLY) gene, partial cds
MW946390.1	Katzelnick,L., Escoto,A., Huang,A., Garcia-Carreras,B., Chowdhury,N., Berry,I., Chavez,C., Rutvisuttinunt,W., Buchy,P., Duong,V., Dussart,P., Gromowski,G., Macareo,L., Smith,D., Jarman,R., Whitehead,S., Salje,H., Cummings,D., Lessler,J., Melendrez,M., Endy,T., Kalanarooj,S., A-Nuegoonpipat,A., Chanama,S., Sangkijporn,S., Klungthong,C., Thaisomboonsuk,B., Nisalak,A., Gibbons,R., Iamsirithaworn,S.,…	2021-04-23T00:00:00Z	01019/95	Dengue virus	Flavivirus	Flaviviridae	ssRNA(+)	10175	GenBank	partial	0	Thailand	Thailand	Homo sapiens	0	1995	Dengue virus type 2 isolate 01019/95 polyprotein (POLY) gene, partial cds
MW946389.1	Katzelnick,L., Escoto,A., Huang,A., Garcia-Carreras,B., Chowdhury,N., Berry,I., Chavez,C., Rutvisuttinunt,W., Buchy,P., Duong,V., Dussart,P., Gromowski,G., Macareo,L., Smith,D., Jarman,R., Whitehead,S., Salje,H., Cummings,D., Lessler,J., Melendrez,M., Endy,T., Kalanarooj,S., A-Nuegoonpipat,A., Chanama,S., Sangkijporn,S., Klungthong,C., Thaisomboonsuk,B., Nisalak,A., Gibbons,R., Iamsirithaworn,S.,…	2021-04-23T00:00:00Z	00499/03	Dengue virus	Flavivirus	Flaviviridae	ssRNA(+)	10175	GenBank	partial	0	Thailand	Thailand	Homo sapiens	0	2003	Dengue virus type 2 isolate 00499/03 polyprotein (POLY) gene, partial cds
MW946388.1	Katzelnick,L., Escoto,A., Huang,A., Garcia-Carreras,B., Chowdhury,N., Berry,I., Chavez,C., Rutvisuttinunt,W., Buchy,P., Duong,V., Dussart,P., Gromowski,G., Macareo,L., Smith,D., Jarman,R., Whitehead,S., Salje,H., Cummings,D., Lessler,J., Melendrez,M., Endy,T., Kalanarooj,S., A-Nuegoonpipat,A., Chanama,S., Sangkijporn,S., Klungthong,C., Thaisomboonsuk,B., Nisalak,A., Gibbons,R., Iamsirithaworn,S.,…	2021-04-23T00:00:00Z	01968/03	Dengue virus	Flavivirus	Flaviviridae	ssRNA(+)	10175	GenBank	partial	0	Thailand	Thailand	Homo sapiens	0	2003	Dengue virus type 2 isolate 01968/03 polyprotein (POLY) gene, partial cds
MW946387.1	Katzelnick,L., Escoto,A., Huang,A., Garcia-Carreras,B., Chowdhury,N., Berry,I., Chavez,C., Rutvisuttinunt,W., Buchy,P., Duong,V., Dussart,P., Gromowski,G., Macareo,L., Smith,D., Jarman,R., Whitehead,S., Salje,H., Cummings,D., Lessler,J., Melendrez,M., Endy,T., Kalanarooj,S., A-Nuegoonpipat,A., Chanama,S., Sangkijporn,S., Klungthong,C., Thaisomboonsuk,B., Nisalak,A., Gibbons,R., Iamsirithaworn,S.,…	2021-04-23T00:00:00Z	00706/94	Dengue virus	Flavivirus	Flaviviridae	ssRNA(+)	10175	GenBank	partial	0	Thailand	Thailand	Homo sapiens	0	1994	Dengue virus type 2 isolate 00706/94 polyprotein (POLY) gene, partial cds
MW946386.1	Katzelnick,L., Escoto,A., Huang,A., Garcia-Carreras,B., Chowdhury,N., Berry,I., Chavez,C., Rutvisuttinunt,W., Buchy,P., Duong,V., Dussart,P., Gromowski,G., Macareo,L., Smith,D., Jarman,R., Whitehead,S., Salje,H., Cummings,D., Lessler,J., Melendrez,M., Endy,T., Kalanarooj,S., A-Nuegoonpipat,A., Chanama,S., Sangkijporn,S., Klungthong,C., Thaisomboonsuk,B., Nisalak,A., Gibbons,R., Iamsirithaworn,S.,…	2021-04-23T00:00:00Z	00828/11	Dengue virus	Flavivirus	Flaviviridae	ssRNA(+)	10175	GenBank	partial	0	Thailand	Thailand	Homo sapiens	0	2011	Dengue virus type 2 isolate 00828/11 polyprotein (POLY) gene, partial cds
MW946385.1	Katzelnick,L., Escoto,A., Huang,A., Garcia-Carreras,B., Chowdhury,N., Berry,I., Chavez,C., Rutvisuttinunt,W., Buchy,P., Duong,V., Dussart,P., Gromowski,G., Macareo,L., Smith,D., Jarman,R., Whitehead,S., Salje,H., Cummings,D., Lessler,J., Melendrez,M., Endy,T., Kalanarooj,S., A-Nuegoonpipat,A., Chanama,S., Sangkijporn,S., Klungthong,C., Thaisomboonsuk,B., Nisalak,A., Gibbons,R., Iamsirithaworn,S.,…	2021-04-23T00:00:00Z	01899/02	Dengue virus	Flavivirus	Flaviviridae	ssRNA(+)	10175	GenBank	partial	0	Thailand	Thailand	Homo sapiens	0	2002	Dengue virus type 2 isolate 01899/02 polyprotein (POLY) gene, partial cds
MW946384.1	Katzelnick,L., Escoto,A., Huang,A., Garcia-Carreras,B., Chowdhury,N., Berry,I., Chavez,C., Rutvisuttinunt,W., Buchy,P., Duong,V., Dussart,P., Gromowski,G., Macareo,L., Smith,D., Jarman,R., Whitehead,S., Salje,H., Cummings,D., Lessler,J., Melendrez,M., Endy,T., Kalanarooj,S., A-Nuegoonpipat,A., Chanama,S., Sangkijporn,S., Klungthong,C., Thaisomboonsuk,B., Nisalak,A., Gibbons,R., Iamsirithaworn,S.,…	2021-04-23T00:00:00Z	00084/97	Dengue virus	Flavivirus	Flaviviridae	ssRNA(+)	10175	GenBank	partial	0	Thailand	Thailand	Homo sapiens	0	1997	Dengue virus type 2 isolate 00084/97 polyprotein (POLY) gene, partial cds
MW946383.1	Katzelnick,L., Escoto,A., Huang,A., Garcia-Carreras,B., Chowdhury,N., Berry,I., Chavez,C., Rutvisuttinunt,W., Buchy,P., Duong,V., Dussart,P., Gromowski,G., Macareo,L., Smith,D., Jarman,R., Whitehead,S., Salje,H., Cummings,D., Lessler,J., Melendrez,M., Endy,T., Kalanarooj,S., A-Nuegoonpipat,A., Chanama,S., Sangkijporn,S., Klungthong,C., Thaisomboonsuk,B., Nisalak,A., Gibbons,R., Iamsirithaworn,S.,…	2021-04-23T00:00:00Z	00656/95	Dengue virus	Flavivirus	Flaviviridae	ssRNA(+)	10175	GenBank	partial	0	Thailand	Thailand	Homo sapiens	0	1995	Dengue virus type 2 isolate 00656/95 polyprotein (POLY) gene, partial cds
MW946382.1	Katzelnick,L., Escoto,A., Huang,A., Garcia-Carreras,B., Chowdhury,N., Berry,I., Chavez,C., Rutvisuttinunt,W., Buchy,P., Duong,V., Dussart,P., Gromowski,G., Macareo,L., Smith,D., Jarman,R., Whitehead,S., Salje,H., Cummings,D., Lessler,J., Melendrez,M., Endy,T., Kalanarooj,S., A-Nuegoonpipat,A., Chanama,S., Sangkijporn,S., Klungthong,C., Thaisomboonsuk,B., Nisalak,A., Gibbons,R., Iamsirithaworn,S.,…	2021-04-23T00:00:00Z	00556/11	Dengue virus	Flavivirus	Flaviviridae	ssRNA(+)	10175	GenBank	partial	0	Thailand	Thailand	Homo sapiens	0	2011	Dengue virus type 2 isolate 00556/11 polyprotein (POLY) gene, partial cds
MW946381.1	Katzelnick,L., Escoto,A., Huang,A., Garcia-Carreras,B., Chowdhury,N., Berry,I., Chavez,C., Rutvisuttinunt,W., Buchy,P., Duong,V., Dussart,P., Gromowski,G., Macareo,L., Smith,D., Jarman,R., Whitehead,S., Salje,H., Cummings,D., Lessler,J., Melendrez,M., Endy,T., Kalanarooj,S., A-Nuegoonpipat,A., Chanama,S., Sangkijporn,S., Klungthong,C., Thaisomboonsuk,B., Nisalak,A., Gibbons,R., Iamsirithaworn,S.,…	2021-04-23T00:00:00Z	01256/04	Dengue virus	Flavivirus	Flaviviridae	ssRNA(+)	10175	GenBank	partial	0	Thailand	Thailand	Homo sapiens	0	2004	Dengue virus type 2 isolate 01256/04 polyprotein (POLY) gene, partial cds
MW946380.1	Katzelnick,L., Escoto,A., Huang,A., Garcia-Carreras,B., Chowdhury,N., Berry,I., Chavez,C., Rutvisuttinunt,W., Buchy,P., Duong,V., Dussart,P., Gromowski,G., Macareo,L., Smith,D., Jarman,R., Whitehead,S., Salje,H., Cummings,D., Lessler,J., Melendrez,M., Endy,T., Kalanarooj,S., A-Nuegoonpipat,A., Chanama,S., Sangkijporn,S., Klungthong,C., Thaisomboonsuk,B., Nisalak,A., Gibbons,R., Iamsirithaworn,S.,…	2021-04-23T00:00:00Z	00290/04	Dengue virus	Flavivirus	Flaviviridae	ssRNA(+)	10175	GenBank	partial	0	Thailand	Thailand	Homo sapiens	0	2004	Dengue virus type 2 isolate 00290/04 polyprotein (POLY) gene, partial cds
MW946379.1	Katzelnick,L., Escoto,A., Huang,A., Garcia-Carreras,B., Chowdhury,N., Berry,I., Chavez,C., Rutvisuttinunt,W., Buchy,P., Duong,V., Dussart,P., Gromowski,G., Macareo,L., Smith,D., Jarman,R., Whitehead,S., Salje,H., Cummings,D., Lessler,J., Melendrez,M., Endy,T., Kalanarooj,S., A-Nuegoonpipat,A., Chanama,S., Sangkijporn,S., Klungthong,C., Thaisomboonsuk,B., Nisalak,A., Gibbons,R., Iamsirithaworn,S.,…	2021-04-23T00:00:00Z	00590/02	Dengue virus	Flavivirus	Flaviviridae	ssRNA(+)	10175	GenBank	partial	0	Thailand	Thailand	Homo sapiens	0	2002	Dengue virus type 2 isolate 00590/02 polyprotein (POLY) gene, partial cds
MW946378.1	Katzelnick,L., Escoto,A., Huang,A., Garcia-Carreras,B., Chowdhury,N., Berry,I., Chavez,C., Rutvisuttinunt,W., Buchy,P., Duong,V., Dussart,P., Gromowski,G., Macareo,L., Smith,D., Jarman,R., Whitehead,S., Salje,H., Cummings,D., Lessler,J., Melendrez,M., Endy,T., Kalanarooj,S., A-Nuegoonpipat,A., Chanama,S., Sangkijporn,S., Klungthong,C., Thaisomboonsuk,B., Nisalak,A., Gibbons,R., Iamsirithaworn,S.,…	2021-04-23T00:00:00Z	00740/04	Dengue virus	Flavivirus	Flaviviridae	ssRNA(+)	10175	GenBank	partial	0	Thailand	Thailand	Homo sapiens	0	2004	Dengue virus type 2 isolate 00740/04 polyprotein (POLY) gene, partial cds
MW946377.1	Katzelnick,L., Escoto,A., Huang,A., Garcia-Carreras,B., Chowdhury,N., Berry,I., Chavez,C., Rutvisuttinunt,W., Buchy,P., Duong,V., Dussart,P., Gromowski,G., Macareo,L., Smith,D., Jarman,R., Whitehead,S., Salje,H., Cummings,D., Lessler,J., Melendrez,M., Endy,T., Kalanarooj,S., A-Nuegoonpipat,A., Chanama,S., Sangkijporn,S., Klungthong,C., Thaisomboonsuk,B., Nisalak,A., Gibbons,R., Iamsirithaworn,S.,…	2021-04-23T00:00:00Z	01066/10	Dengue virus	Flavivirus	Flaviviridae	ssRNA(+)	10175	GenBank	partial	0	Thailand	Thailand	Homo sapiens	0	2010	Dengue virus type 2 isolate 01066/10 polyprotein (POLY) gene, partial cds
MW946376.1	Katzelnick,L., Escoto,A., Huang,A., Garcia-Carreras,B., Chowdhury,N., Berry,I., Chavez,C., Rutvisuttinunt,W., Buchy,P., Duong,V., Dussart,P., Gromowski,G., Macareo,L., Smith,D., Jarman,R., Whitehead,S., Salje,H., Cummings,D., Lessler,J., Melendrez,M., Endy,T., Kalanarooj,S., A-Nuegoonpipat,A., Chanama,S., Sangkijporn,S., Klungthong,C., Thaisomboonsuk,B., Nisalak,A., Gibbons,R., Iamsirithaworn,S.,…	2021-04-23T00:00:00Z	00045/11	Dengue virus	Flavivirus	Flaviviridae	ssRNA(+)	10175	GenBank	partial	0	Thailand	Thailand	Homo sapiens	0	2011	Dengue virus type 2 isolate 00045/11 polyprotein (POLY) gene, partial cds
MW946375.1	Katzelnick,L., Escoto,A., Huang,A., Garcia-Carreras,B., Chowdhury,N., Berry,I., Chavez,C., Rutvisuttinunt,W., Buchy,P., Duong,V., Dussart,P., Gromowski,G., Macareo,L., Smith,D., Jarman,R., Whitehead,S., Salje,H., Cummings,D., Lessler,J., Melendrez,M., Endy,T., Kalanarooj,S., A-Nuegoonpipat,A., Chanama,S., Sangkijporn,S., Klungthong,C., Thaisomboonsuk,B., Nisalak,A., Gibbons,R., Iamsirithaworn,S.,…	2021-04-23T00:00:00Z	00118/12	Dengue virus	Flavivirus	Flaviviridae	ssRNA(+)	10175	GenBank	partial	0	Thailand	Thailand	Homo sapiens	0	2012	Dengue virus type 2 isolate 00118/12 polyprotein (POLY) gene, partial cds
MW946374.1	Katzelnick,L., Escoto,A., Huang,A., Garcia-Carreras,B., Chowdhury,N., Berry,I., Chavez,C., Rutvisuttinunt,W., Buchy,P., Duong,V., Dussart,P., Gromowski,G., Macareo,L., Smith,D., Jarman,R., Whitehead,S., Salje,H., Cummings,D., Lessler,J., Melendrez,M., Endy,T., Kalanarooj,S., A-Nuegoonpipat,A., Chanama,S., Sangkijporn,S., Klungthong,C., Thaisomboonsuk,B., Nisalak,A., Gibbons,R., Iamsirithaworn,S.,…	2021-04-23T00:00:00Z	00478/12	Dengue virus	Flavivirus	Flaviviridae	ssRNA(+)	10175	GenBank	partial	0	Thailand	Thailand	Homo sapiens	0	2012	Dengue virus type 2 isolate 00478/12 polyprotein (POLY) gene, partial cds
MW946373.1	Katzelnick,L., Escoto,A., Huang,A., Garcia-Carreras,B., Chowdhury,N., Berry,I., Chavez,C., Rutvisuttinunt,W., Buchy,P., Duong,V., Dussart,P., Gromowski,G., Macareo,L., Smith,D., Jarman,R., Whitehead,S., Salje,H., Cummings,D., Lessler,J., Melendrez,M., Endy,T., Kalanarooj,S., A-Nuegoonpipat,A., Chanama,S., Sangkijporn,S., Klungthong,C., Thaisomboonsuk,B., Nisalak,A., Gibbons,R., Iamsirithaworn,S.,…	2021-04-23T00:00:00Z	05015/01	Dengue virus	Flavivirus	Flaviviridae	ssRNA(+)	10175	GenBank	partial	0	Thailand	Thailand	Homo sapiens	0	2001	Dengue virus type 2 isolate 05015/01 polyprotein (POLY) gene, partial cds
MW946372.1	Katzelnick,L., Escoto,A., Huang,A., Garcia-Carreras,B., Chowdhury,N., Berry,I., Chavez,C., Rutvisuttinunt,W., Buchy,P., Duong,V., Dussart,P., Gromowski,G., Macareo,L., Smith,D., Jarman,R., Whitehead,S., Salje,H., Cummings,D., Lessler,J., Melendrez,M., Endy,T., Kalanarooj,S., A-Nuegoonpipat,A., Chanama,S., Sangkijporn,S., Klungthong,C., Thaisomboonsuk,B., Nisalak,A., Gibbons,R., Iamsirithaworn,S.,…	2021-04-23T00:00:00Z	00925/95	Dengue virus	Flavivirus	Flaviviridae	ssRNA(+)	10175	GenBank	partial	0	Thailand	Thailand	Homo sapiens	0	1995	Dengue virus type 2 isolate 00925/95 polyprotein (POLY) gene, partial cds
MW946371.1	Katzelnick,L., Escoto,A., Huang,A., Garcia-Carreras,B., Chowdhury,N., Berry,I., Chavez,C., Rutvisuttinunt,W., Buchy,P., Duong,V., Dussart,P., Gromowski,G., Macareo,L., Smith,D., Jarman,R., Whitehead,S., Salje,H., Cummings,D., Lessler,J., Melendrez,M., Endy,T., Kalanarooj,S., A-Nuegoonpipat,A., Chanama,S., Sangkijporn,S., Klungthong,C., Thaisomboonsuk,B., Nisalak,A., Gibbons,R., Iamsirithaworn,S.,…	2021-04-23T00:00:00Z	00037/04	Dengue virus	Flavivirus	Flaviviridae	ssRNA(+)	10175	GenBank	partial	0	Thailand	Thailand	Homo sapiens	0	2004	Dengue virus type 2 isolate 00037/04 polyprotein (POLY) gene, partial cds
MW946370.1	Katzelnick,L., Escoto,A., Huang,A., Garcia-Carreras,B., Chowdhury,N., Berry,I., Chavez,C., Rutvisuttinunt,W., Buchy,P., Duong,V., Dussart,P., Gromowski,G., Macareo,L., Smith,D., Jarman,R., Whitehead,S., Salje,H., Cummings,D., Lessler,J., Melendrez,M., Endy,T., Kalanarooj,S., A-Nuegoonpipat,A., Chanama,S., Sangkijporn,S., Klungthong,C., Thaisomboonsuk,B., Nisalak,A., Gibbons,R., Iamsirithaworn,S.,…	2021-04-23T00:00:00Z	02393/06	Dengue virus	Flavivirus	Flaviviridae	ssRNA(+)	10175	GenBank	partial	0	Thailand	Thailand	Homo sapiens	0	2006	Dengue virus type 2 isolate 02393/06 polyprotein (POLY) gene, partial cds
MW946369.1	Katzelnick,L., Escoto,A., Huang,A., Garcia-Carreras,B., Chowdhury,N., Berry,I., Chavez,C., Rutvisuttinunt,W., Buchy,P., Duong,V., Dussart,P., Gromowski,G., Macareo,L., Smith,D., Jarman,R., Whitehead,S., Salje,H., Cummings,D., Lessler,J., Melendrez,M., Endy,T., Kalanarooj,S., A-Nuegoonpipat,A., Chanama,S., Sangkijporn,S., Klungthong,C., Thaisomboonsuk,B., Nisalak,A., Gibbons,R., Iamsirithaworn,S.,…	2021-04-23T00:00:00Z	00849/94	Dengue virus	Flavivirus	Flaviviridae	ssRNA(+)	10175	GenBank	partial	0	Thailand	Thailand	Homo sapiens	0	1994	Dengue virus type 2 isolate 00849/94 polyprotein (POLY) gene, partial cds
MW946368.1	Katzelnick,L., Escoto,A., Huang,A., Garcia-Carreras,B., Chowdhury,N., Berry,I., Chavez,C., Rutvisuttinunt,W., Buchy,P., Duong,V., Dussart,P., Gromowski,G., Macareo,L., Smith,D., Jarman,R., Whitehead,S., Salje,H., Cummings,D., Lessler,J., Melendrez,M., Endy,T., Kalanarooj,S., A-Nuegoonpipat,A., Chanama,S., Sangkijporn,S., Klungthong,C., Thaisomboonsuk,B., Nisalak,A., Gibbons,R., Iamsirithaworn,S.,…	2021-04-23T00:00:00Z	02947/99	Dengue virus	Flavivirus	Flaviviridae	ssRNA(+)	10175	GenBank	partial	0	Thailand	Thailand	Homo sapiens	0	1999	Dengue virus type 2 isolate 02947/99 polyprotein (POLY) gene, partial cds
MW946367.1	Katzelnick,L., Escoto,A., Huang,A., Garcia-Carreras,B., Chowdhury,N., Berry,I., Chavez,C., Rutvisuttinunt,W., Buchy,P., Duong,V., Dussart,P., Gromowski,G., Macareo,L., Smith,D., Jarman,R., Whitehead,S., Salje,H., Cummings,D., Lessler,J., Melendrez,M., Endy,T., Kalanarooj,S., A-Nuegoonpipat,A., Chanama,S., Sangkijporn,S., Klungthong,C., Thaisomboonsuk,B., Nisalak,A., Gibbons,R., Iamsirithaworn,S.,…	2021-04-23T00:00:00Z	01206/10	Dengue virus	Flavivirus	Flaviviridae	ssRNA(+)	10175	GenBank	partial	0	Thailand	Thailand	Homo sapiens	0	2010	Dengue virus type 2 isolate 01206/10 polyprotein (POLY) gene, partial cds
MW946366.1	Katzelnick,L., Escoto,A., Huang,A., Garcia-Carreras,B., Chowdhury,N., Berry,I., Chavez,C., Rutvisuttinunt,W., Buchy,P., Duong,V., Dussart,P., Gromowski,G., Macareo,L., Smith,D., Jarman,R., Whitehead,S., Salje,H., Cummings,D., Lessler,J., Melendrez,M., Endy,T., Kalanarooj,S., A-Nuegoonpipat,A., Chanama,S., Sangkijporn,S., Klungthong,C., Thaisomboonsuk,B., Nisalak,A., Gibbons,R., Iamsirithaworn,S.,…	2021-04-23T00:00:00Z	01449/10	Dengue virus	Flavivirus	Flaviviridae	ssRNA(+)	10175	GenBank	partial	0	Thailand	Thailand	Homo sapiens	0	2010	Dengue virus type 2 isolate 01449/10 polyprotein (POLY) gene, partial cds
MW946365.1	Katzelnick,L., Escoto,A., Huang,A., Garcia-Carreras,B., Chowdhury,N., Berry,I., Chavez,C., Rutvisuttinunt,W., Buchy,P., Duong,V., Dussart,P., Gromowski,G., Macareo,L., Smith,D., Jarman,R., Whitehead,S., Salje,H., Cummings,D., Lessler,J., Melendrez,M., Endy,T., Kalanarooj,S., A-Nuegoonpipat,A., Chanama,S., Sangkijporn,S., Klungthong,C., Thaisomboonsuk,B., Nisalak,A., Gibbons,R., Iamsirithaworn,S.,…	2021-04-23T00:00:00Z	00856/95	Dengue virus	Flavivirus	Flaviviridae	ssRNA(+)	10175	GenBank	partial	0	Thailand	Thailand	Homo sapiens	0	1995	Dengue virus type 2 isolate 00856/95 polyprotein (POLY) gene, partial cds
MW946364.1	Katzelnick,L., Escoto,A., Huang,A., Garcia-Carreras,B., Chowdhury,N., Berry,I., Chavez,C., Rutvisuttinunt,W., Buchy,P., Duong,V., Dussart,P., Gromowski,G., Macareo,L., Smith,D., Jarman,R., Whitehead,S., Salje,H., Cummings,D., Lessler,J., Melendrez,M., Endy,T., Kalanarooj,S., A-Nuegoonpipat,A., Chanama,S., Sangkijporn,S., Klungthong,C., Thaisomboonsuk,B., Nisalak,A., Gibbons,R., Iamsirithaworn,S.,…	2021-04-23T00:00:00Z	01315/96	Dengue virus	Flavivirus	Flaviviridae	ssRNA(+)	10175	GenBank	partial	0	Thailand	Thailand	Homo sapiens	0	1996	Dengue virus type 2 isolate 01315/96 polyprotein (POLY) gene, partial cds
MW946363.1	Katzelnick,L., Escoto,A., Huang,A., Garcia-Carreras,B., Chowdhury,N., Berry,I., Chavez,C., Rutvisuttinunt,W., Buchy,P., Duong,V., Dussart,P., Gromowski,G., Macareo,L., Smith,D., Jarman,R., Whitehead,S., Salje,H., Cummings,D., Lessler,J., Melendrez,M., Endy,T., Kalanarooj,S., A-Nuegoonpipat,A., Chanama,S., Sangkijporn,S., Klungthong,C., Thaisomboonsuk,B., Nisalak,A., Gibbons,R., Iamsirithaworn,S.,…	2021-04-23T00:00:00Z	01281/95	Dengue virus	Flavivirus	Flaviviridae	ssRNA(+)	10175	GenBank	partial	0	Thailand	Thailand	Homo sapiens	0	1995	Dengue virus type 2 isolate 01281/95 polyprotein (POLY) gene, partial cds
MW946362.1	Katzelnick,L., Escoto,A., Huang,A., Garcia-Carreras,B., Chowdhury,N., Berry,I., Chavez,C., Rutvisuttinunt,W., Buchy,P., Duong,V., Dussart,P., Gromowski,G., Macareo,L., Smith,D., Jarman,R., Whitehead,S., Salje,H., Cummings,D., Lessler,J., Melendrez,M., Endy,T., Kalanarooj,S., A-Nuegoonpipat,A., Chanama,S., Sangkijporn,S., Klungthong,C., Thaisomboonsuk,B., Nisalak,A., Gibbons,R., Iamsirithaworn,S.,…	2021-04-23T00:00:00Z	02113/00	Dengue virus	Flavivirus	Flaviviridae	ssRNA(+)	10175	GenBank	partial	0	Thailand	Thailand	Homo sapiens	0	2000	Dengue virus type 2 isolate 02113/00 polyprotein (POLY) gene, partial cds
MW946361.1	Katzelnick,L., Escoto,A., Huang,A., Garcia-Carreras,B., Chowdhury,N., Berry,I., Chavez,C., Rutvisuttinunt,W., Buchy,P., Duong,V., Dussart,P., Gromowski,G., Macareo,L., Smith,D., Jarman,R., Whitehead,S., Salje,H., Cummings,D., Lessler,J., Melendrez,M., Endy,T., Kalanarooj,S., A-Nuegoonpipat,A., Chanama,S., Sangkijporn,S., Klungthong,C., Thaisomboonsuk,B., Nisalak,A., Gibbons,R., Iamsirithaworn,S.,…	2021-04-23T00:00:00Z	01181/96	Dengue virus	Flavivirus	Flaviviridae	ssRNA(+)	10175	GenBank	partial	0	Thailand	Thailand	Homo sapiens	0	1996	Dengue virus type 2 isolate 01181/96 polyprotein (POLY) gene, partial cds
MW946360.1	Katzelnick,L., Escoto,A., Huang,A., Garcia-Carreras,B., Chowdhury,N., Berry,I., Chavez,C., Rutvisuttinunt,W., Buchy,P., Duong,V., Dussart,P., Gromowski,G., Macareo,L., Smith,D., Jarman,R., Whitehead,S., Salje,H., Cummings,D., Lessler,J., Melendrez,M., Endy,T., Kalanarooj,S., A-Nuegoonpipat,A., Chanama,S., Sangkijporn,S., Klungthong,C., Thaisomboonsuk,B., Nisalak,A., Gibbons,R., Iamsirithaworn,S.,…	2021-04-23T00:00:00Z	00270/03	Dengue virus	Flavivirus	Flaviviridae	ssRNA(+)	10175	GenBank	partial	0	Thailand	Thailand	Homo sapiens	0	2003	Dengue virus type 2 isolate 00270/03 polyprotein (POLY) gene, partial cds
MW946359.1	Katzelnick,L., Escoto,A., Huang,A., Garcia-Carreras,B., Chowdhury,N., Berry,I., Chavez,C., Rutvisuttinunt,W., Buchy,P., Duong,V., Dussart,P., Gromowski,G., Macareo,L., Smith,D., Jarman,R., Whitehead,S., Salje,H., Cummings,D., Lessler,J., Melendrez,M., Endy,T., Kalanarooj,S., A-Nuegoonpipat,A., Chanama,S., Sangkijporn,S., Klungthong,C., Thaisomboonsuk,B., Nisalak,A., Gibbons,R., Iamsirithaworn,S.,…	2021-04-23T00:00:00Z	00016/14	Dengue virus	Flavivirus	Flaviviridae	ssRNA(+)	10175	GenBank	partial	0	Thailand	Thailand	Homo sapiens	0	2014	Dengue virus type 2 isolate 00016/14 polyprotein (POLY) gene, partial cds
MW946358.1	Katzelnick,L., Escoto,A., Huang,A., Garcia-Carreras,B., Chowdhury,N., Berry,I., Chavez,C., Rutvisuttinunt,W., Buchy,P., Duong,V., Dussart,P., Gromowski,G., Macareo,L., Smith,D., Jarman,R., Whitehead,S., Salje,H., Cummings,D., Lessler,J., Melendrez,M., Endy,T., Kalanarooj,S., A-Nuegoonpipat,A., Chanama,S., Sangkijporn,S., Klungthong,C., Thaisomboonsuk,B., Nisalak,A., Gibbons,R., Iamsirithaworn,S.,…	2021-04-23T00:00:00Z	02455/03	Dengue virus	Flavivirus	Flaviviridae	ssRNA(+)	10175	GenBank	partial	0	Thailand	Thailand	Homo sapiens	0	2003	Dengue virus type 2 isolate 02455/03 polyprotein (POLY) gene, partial cds
MW946357.1	Katzelnick,L., Escoto,A., Huang,A., Garcia-Carreras,B., Chowdhury,N., Berry,I., Chavez,C., Rutvisuttinunt,W., Buchy,P., Duong,V., Dussart,P., Gromowski,G., Macareo,L., Smith,D., Jarman,R., Whitehead,S., Salje,H., Cummings,D., Lessler,J., Melendrez,M., Endy,T., Kalanarooj,S., A-Nuegoonpipat,A., Chanama,S., Sangkijporn,S., Klungthong,C., Thaisomboonsuk,B., Nisalak,A., Gibbons,R., Iamsirithaworn,S.,…	2021-04-23T00:00:00Z	00809/97	Dengue virus	Flavivirus	Flaviviridae	ssRNA(+)	10175	GenBank	partial	0	Thailand	Thailand	Homo sapiens	0	1997	Dengue virus type 2 isolate 00809/97 polyprotein (POLY) gene, partial cds
MW946356.1	Katzelnick,L., Escoto,A., Huang,A., Garcia-Carreras,B., Chowdhury,N., Berry,I., Chavez,C., Rutvisuttinunt,W., Buchy,P., Duong,V., Dussart,P., Gromowski,G., Macareo,L., Smith,D., Jarman,R., Whitehead,S., Salje,H., Cummings,D., Lessler,J., Melendrez,M., Endy,T., Kalanarooj,S., A-Nuegoonpipat,A., Chanama,S., Sangkijporn,S., Klungthong,C., Thaisomboonsuk,B., Nisalak,A., Gibbons,R., Iamsirithaworn,S.,…	2021-04-23T00:00:00Z	00637/94	Dengue virus	Flavivirus	Flaviviridae	ssRNA(+)	10175	GenBank	partial	0	Thailand	Thailand	Homo sapiens	0	1994	Dengue virus type 2 isolate 00637/94 polyprotein (POLY) gene, partial cds
MW946355.1	Katzelnick,L., Escoto,A., Huang,A., Garcia-Carreras,B., Chowdhury,N., Berry,I., Chavez,C., Rutvisuttinunt,W., Buchy,P., Duong,V., Dussart,P., Gromowski,G., Macareo,L., Smith,D., Jarman,R., Whitehead,S., Salje,H., Cummings,D., Lessler,J., Melendrez,M., Endy,T., Kalanarooj,S., A-Nuegoonpipat,A., Chanama,S., Sangkijporn,S., Klungthong,C., Thaisomboonsuk,B., Nisalak,A., Gibbons,R., Iamsirithaworn,S.,…	2021-04-23T00:00:00Z	01849/07	Dengue virus	Flavivirus	Flaviviridae	ssRNA(+)	10175	GenBank	partial	0	Thailand	Thailand	Homo sapiens	0	2007	Dengue virus type 2 isolate 01849/07 polyprotein (POLY) gene, partial cds
MW946354.1	Katzelnick,L., Escoto,A., Huang,A., Garcia-Carreras,B., Chowdhury,N., Berry,I., Chavez,C., Rutvisuttinunt,W., Buchy,P., Duong,V., Dussart,P., Gromowski,G., Macareo,L., Smith,D., Jarman,R., Whitehead,S., Salje,H., Cummings,D., Lessler,J., Melendrez,M., Endy,T., Kalanarooj,S., A-Nuegoonpipat,A., Chanama,S., Sangkijporn,S., Klungthong,C., Thaisomboonsuk,B., Nisalak,A., Gibbons,R., Iamsirithaworn,S.,…	2021-04-23T00:00:00Z	00098/04	Dengue virus	Flavivirus	Flaviviridae	ssRNA(+)	10175	GenBank	partial	0	Thailand	Thailand	Homo sapiens	0	2004	Dengue virus type 2 isolate 00098/04 polyprotein (POLY) gene, partial cds
MW946353.1	Katzelnick,L., Escoto,A., Huang,A., Garcia-Carreras,B., Chowdhury,N., Berry,I., Chavez,C., Rutvisuttinunt,W., Buchy,P., Duong,V., Dussart,P., Gromowski,G., Macareo,L., Smith,D., Jarman,R., Whitehead,S., Salje,H., Cummings,D., Lessler,J., Melendrez,M., Endy,T., Kalanarooj,S., A-Nuegoonpipat,A., Chanama,S., Sangkijporn,S., Klungthong,C., Thaisomboonsuk,B., Nisalak,A., Gibbons,R., Iamsirithaworn,S.,…	2021-04-23T00:00:00Z	00630/04	Dengue virus	Flavivirus	Flaviviridae	ssRNA(+)	10175	GenBank	partial	0	Thailand	Thailand	Homo sapiens	0	2004	Dengue virus type 2 isolate 00630/04 polyprotein (POLY) gene, partial cds
MW946352.1	Katzelnick,L., Escoto,A., Huang,A., Garcia-Carreras,B., Chowdhury,N., Berry,I., Chavez,C., Rutvisuttinunt,W., Buchy,P., Duong,V., Dussart,P., Gromowski,G., Macareo,L., Smith,D., Jarman,R., Whitehead,S., Salje,H., Cummings,D., Lessler,J., Melendrez,M., Endy,T., Kalanarooj,S., A-Nuegoonpipat,A., Chanama,S., Sangkijporn,S., Klungthong,C., Thaisomboonsuk,B., Nisalak,A., Gibbons,R., Iamsirithaworn,S.,…	2021-04-23T00:00:00Z	00511/07	Dengue virus	Flavivirus	Flaviviridae	ssRNA(+)	10175	GenBank	partial	0	Thailand	Thailand	Homo sapiens	0	2007	Dengue virus type 2 isolate 00511/07 polyprotein (POLY) gene, partial cds
MW946351.1	Katzelnick,L., Escoto,A., Huang,A., Garcia-Carreras,B., Chowdhury,N., Berry,I., Chavez,C., Rutvisuttinunt,W., Buchy,P., Duong,V., Dussart,P., Gromowski,G., Macareo,L., Smith,D., Jarman,R., Whitehead,S., Salje,H., Cummings,D., Lessler,J., Melendrez,M., Endy,T., Kalanarooj,S., A-Nuegoonpipat,A., Chanama,S., Sangkijporn,S., Klungthong,C., Thaisomboonsuk,B., Nisalak,A., Gibbons,R., Iamsirithaworn,S.,…	2021-04-23T00:00:00Z	01726/13	Dengue virus	Flavivirus	Flaviviridae	ssRNA(+)	10173	GenBank	partial	0	Thailand	Thailand	Homo sapiens	0	2013	Dengue virus type 2 isolate 01726/13 polyprotein (POLY) gene, partial cds
MW946350.1	Katzelnick,L., Escoto,A., Huang,A., Garcia-Carreras,B., Chowdhury,N., Berry,I., Chavez,C., Rutvisuttinunt,W., Buchy,P., Duong,V., Dussart,P., Gromowski,G., Macareo,L., Smith,D., Jarman,R., Whitehead,S., Salje,H., Cummings,D., Lessler,J., Melendrez,M., Endy,T., Kalanarooj,S., A-Nuegoonpipat,A., Chanama,S., Sangkijporn,S., Klungthong,C., Thaisomboonsuk,B., Nisalak,A., Gibbons,R., Iamsirithaworn,S.,…	2021-04-23T00:00:00Z	07537/97	Dengue virus	Flavivirus	Flaviviridae	ssRNA(+)	10175	GenBank	partial	0	Thailand	Thailand	Homo sapiens	0	1997	Dengue virus type 2 isolate 07537/97 polyprotein (POLY) gene, partial cds
MW946349.1	Katzelnick,L., Escoto,A., Huang,A., Garcia-Carreras,B., Chowdhury,N., Berry,I., Chavez,C., Rutvisuttinunt,W., Buchy,P., Duong,V., Dussart,P., Gromowski,G., Macareo,L., Smith,D., Jarman,R., Whitehead,S., Salje,H., Cummings,D., Lessler,J., Melendrez,M., Endy,T., Kalanarooj,S., A-Nuegoonpipat,A., Chanama,S., Sangkijporn,S., Klungthong,C., Thaisomboonsuk,B., Nisalak,A., Gibbons,R., Iamsirithaworn,S.,…	2021-04-23T00:00:00Z	02148/03	Dengue virus	Flavivirus	Flaviviridae	ssRNA(+)	10175	GenBank	partial	0	Thailand	Thailand	Homo sapiens	0	2003	Dengue virus type 2 isolate 02148/03 polyprotein (POLY) gene, partial cds
MW946348.1	Katzelnick,L., Escoto,A., Huang,A., Garcia-Carreras,B., Chowdhury,N., Berry,I., Chavez,C., Rutvisuttinunt,W., Buchy,P., Duong,V., Dussart,P., Gromowski,G., Macareo,L., Smith,D., Jarman,R., Whitehead,S., Salje,H., Cummings,D., Lessler,J., Melendrez,M., Endy,T., Kalanarooj,S., A-Nuegoonpipat,A., Chanama,S., Sangkijporn,S., Klungthong,C., Thaisomboonsuk,B., Nisalak,A., Gibbons,R., Iamsirithaworn,S.,…	2021-04-23T00:00:00Z	04539/99	Dengue virus	Flavivirus	Flaviviridae	ssRNA(+)	10175	GenBank	partial	0	Thailand	Thailand	Homo sapiens	0	1999	Dengue virus type 2 isolate 04539/99 polyprotein (POLY) gene, partial cds
MW946347.1	Katzelnick,L., Escoto,A., Huang,A., Garcia-Carreras,B., Chowdhury,N., Berry,I., Chavez,C., Rutvisuttinunt,W., Buchy,P., Duong,V., Dussart,P., Gromowski,G., Macareo,L., Smith,D., Jarman,R., Whitehead,S., Salje,H., Cummings,D., Lessler,J., Melendrez,M., Endy,T., Kalanarooj,S., A-Nuegoonpipat,A., Chanama,S., Sangkijporn,S., Klungthong,C., Thaisomboonsuk,B., Nisalak,A., Gibbons,R., Iamsirithaworn,S.,…	2021-04-23T00:00:00Z	00070/03	Dengue virus	Flavivirus	Flaviviridae	ssRNA(+)	10175	GenBank	partial	0	Thailand	Thailand	Homo sapiens	0	2003	Dengue virus type 2 isolate 00070/03 polyprotein (POLY) gene, partial cds
MW946346.1	Katzelnick,L., Escoto,A., Huang,A., Garcia-Carreras,B., Chowdhury,N., Berry,I., Chavez,C., Rutvisuttinunt,W., Buchy,P., Duong,V., Dussart,P., Gromowski,G., Macareo,L., Smith,D., Jarman,R., Whitehead,S., Salje,H., Cummings,D., Lessler,J., Melendrez,M., Endy,T., Kalanarooj,S., A-Nuegoonpipat,A., Chanama,S., Sangkijporn,S., Klungthong,C., Thaisomboonsuk,B., Nisalak,A., Gibbons,R., Iamsirithaworn,S.,…	2021-04-23T00:00:00Z	01430/94	Dengue virus	Flavivirus	Flaviviridae	ssRNA(+)	10175	GenBank	partial	0	Thailand	Thailand	Homo sapiens	0	1994	Dengue virus type 2 isolate 01430/94 polyprotein (POLY) gene, partial cds
MW946344.1	Katzelnick,L., Escoto,A., Huang,A., Garcia-Carreras,B., Chowdhury,N., Berry,I., Chavez,C., Rutvisuttinunt,W., Buchy,P., Duong,V., Dussart,P., Gromowski,G., Macareo,L., Smith,D., Jarman,R., Whitehead,S., Salje,H., Cummings,D., Lessler,J., Melendrez,M., Endy,T., Kalanarooj,S., A-Nuegoonpipat,A., Chanama,S., Sangkijporn,S., Klungthong,C., Thaisomboonsuk,B., Nisalak,A., Gibbons,R., Iamsirithaworn,S.,…	2021-04-23T00:00:00Z	04952/97	Dengue virus	Flavivirus	Flaviviridae	ssRNA(+)	10175	GenBank	partial	0	Thailand	Thailand	Homo sapiens	0	1997	Dengue virus type 2 isolate 04952/97 polyprotein (POLY) gene, partial cds
MW946343.1	Katzelnick,L., Escoto,A., Huang,A., Garcia-Carreras,B., Chowdhury,N., Berry,I., Chavez,C., Rutvisuttinunt,W., Buchy,P., Duong,V., Dussart,P., Gromowski,G., Macareo,L., Smith,D., Jarman,R., Whitehead,S., Salje,H., Cummings,D., Lessler,J., Melendrez,M., Endy,T., Kalanarooj,S., A-Nuegoonpipat,A., Chanama,S., Sangkijporn,S., Klungthong,C., Thaisomboonsuk,B., Nisalak,A., Gibbons,R., Iamsirithaworn,S.,…	2021-04-23T00:00:00Z	00298/95	Dengue virus	Flavivirus	Flaviviridae	ssRNA(+)	10175	GenBank	partial	0	Thailand	Thailand	Homo sapiens	0	1995	Dengue virus type 2 isolate 00298/95 polyprotein (POLY) gene, partial cds
MW946342.1	Katzelnick,L., Escoto,A., Huang,A., Garcia-Carreras,B., Chowdhury,N., Berry,I., Chavez,C., Rutvisuttinunt,W., Buchy,P., Duong,V., Dussart,P., Gromowski,G., Macareo,L., Smith,D., Jarman,R., Whitehead,S., Salje,H., Cummings,D., Lessler,J., Melendrez,M., Endy,T., Kalanarooj,S., A-Nuegoonpipat,A., Chanama,S., Sangkijporn,S., Klungthong,C., Thaisomboonsuk,B., Nisalak,A., Gibbons,R., Iamsirithaworn,S.,…	2021-04-23T00:00:00Z	01171/05	Dengue virus	Flavivirus	Flaviviridae	ssRNA(+)	10175	GenBank	partial	0	Thailand	Thailand	Homo sapiens	0	2005	Dengue virus type 2 isolate 01171/05 polyprotein (POLY) gene, partial cds
MW946341.1	Katzelnick,L., Escoto,A., Huang,A., Garcia-Carreras,B., Chowdhury,N., Berry,I., Chavez,C., Rutvisuttinunt,W., Buchy,P., Duong,V., Dussart,P., Gromowski,G., Macareo,L., Smith,D., Jarman,R., Whitehead,S., Salje,H., Cummings,D., Lessler,J., Melendrez,M., Endy,T., Kalanarooj,S., A-Nuegoonpipat,A., Chanama,S., Sangkijporn,S., Klungthong,C., Thaisomboonsuk,B., Nisalak,A., Gibbons,R., Iamsirithaworn,S.,…	2021-04-23T00:00:00Z	00380/00	Dengue virus	Flavivirus	Flaviviridae	ssRNA(+)	10175	GenBank	partial	0	Thailand	Thailand	Homo sapiens	0	2000	Dengue virus type 2 isolate 00380/00 polyprotein (POLY) gene, partial cds
MW946340.1	Katzelnick,L., Escoto,A., Huang,A., Garcia-Carreras,B., Chowdhury,N., Berry,I., Chavez,C., Rutvisuttinunt,W., Buchy,P., Duong,V., Dussart,P., Gromowski,G., Macareo,L., Smith,D., Jarman,R., Whitehead,S., Salje,H., Cummings,D., Lessler,J., Melendrez,M., Endy,T., Kalanarooj,S., A-Nuegoonpipat,A., Chanama,S., Sangkijporn,S., Klungthong,C., Thaisomboonsuk,B., Nisalak,A., Gibbons,R., Iamsirithaworn,S.,…	2021-04-23T00:00:00Z	01291/05	Dengue virus	Flavivirus	Flaviviridae	ssRNA(+)	10175	GenBank	partial	0	Thailand	Thailand	Homo sapiens	0	2005	Dengue virus type 2 isolate 01291/05 polyprotein (POLY) gene, partial cds
MW946339.1	Katzelnick,L., Escoto,A., Huang,A., Garcia-Carreras,B., Chowdhury,N., Berry,I., Chavez,C., Rutvisuttinunt,W., Buchy,P., Duong,V., Dussart,P., Gromowski,G., Macareo,L., Smith,D., Jarman,R., Whitehead,S., Salje,H., Cummings,D., Lessler,J., Melendrez,M., Endy,T., Kalanarooj,S., A-Nuegoonpipat,A., Chanama,S., Sangkijporn,S., Klungthong,C., Thaisomboonsuk,B., Nisalak,A., Gibbons,R., Iamsirithaworn,S.,…	2021-04-23T00:00:00Z	00838/13	Dengue virus	Flavivirus	Flaviviridae	ssRNA(+)	10175	GenBank	partial	0	Thailand	Thailand	Homo sapiens	0	2013	Dengue virus type 2 isolate 00838/13 polyprotein (POLY) gene, partial cds
MW946338.1	Katzelnick,L., Escoto,A., Huang,A., Garcia-Carreras,B., Chowdhury,N., Berry,I., Chavez,C., Rutvisuttinunt,W., Buchy,P., Duong,V., Dussart,P., Gromowski,G., Macareo,L., Smith,D., Jarman,R., Whitehead,S., Salje,H., Cummings,D., Lessler,J., Melendrez,M., Endy,T., Kalanarooj,S., A-Nuegoonpipat,A., Chanama,S., Sangkijporn,S., Klungthong,C., Thaisomboonsuk,B., Nisalak,A., Gibbons,R., Iamsirithaworn,S.,…	2021-04-23T00:00:00Z	02118/96	Dengue virus	Flavivirus	Flaviviridae	ssRNA(+)	10175	GenBank	partial	0	Thailand	Thailand	Homo sapiens	0	1996	Dengue virus type 2 isolate 02118/96 polyprotein (POLY) gene, partial cds
MW946337.1	Katzelnick,L., Escoto,A., Huang,A., Garcia-Carreras,B., Chowdhury,N., Berry,I., Chavez,C., Rutvisuttinunt,W., Buchy,P., Duong,V., Dussart,P., Gromowski,G., Macareo,L., Smith,D., Jarman,R., Whitehead,S., Salje,H., Cummings,D., Lessler,J., Melendrez,M., Endy,T., Kalanarooj,S., A-Nuegoonpipat,A., Chanama,S., Sangkijporn,S., Klungthong,C., Thaisomboonsuk,B., Nisalak,A., Gibbons,R., Iamsirithaworn,S.,…	2021-04-23T00:00:00Z	03657/99	Dengue virus	Flavivirus	Flaviviridae	ssRNA(+)	10175	GenBank	partial	0	Thailand	Thailand	Homo sapiens	0	1999	Dengue virus type 2 isolate 03657/99 polyprotein (POLY) gene, partial cds
MW946336.1	Katzelnick,L., Escoto,A., Huang,A., Garcia-Carreras,B., Chowdhury,N., Berry,I., Chavez,C., Rutvisuttinunt,W., Buchy,P., Duong,V., Dussart,P., Gromowski,G., Macareo,L., Smith,D., Jarman,R., Whitehead,S., Salje,H., Cummings,D., Lessler,J., Melendrez,M., Endy,T., Kalanarooj,S., A-Nuegoonpipat,A., Chanama,S., Sangkijporn,S., Klungthong,C., Thaisomboonsuk,B., Nisalak,A., Gibbons,R., Iamsirithaworn,S.,…	2021-04-23T00:00:00Z	00576/07	Dengue virus	Flavivirus	Flaviviridae	ssRNA(+)	10175	GenBank	partial	0	Thailand	Thailand	Homo sapiens	0	2007	Dengue virus type 2 isolate 00576/07 polyprotein (POLY) gene, partial cds
MW946335.1	Katzelnick,L., Escoto,A., Huang,A., Garcia-Carreras,B., Chowdhury,N., Berry,I., Chavez,C., Rutvisuttinunt,W., Buchy,P., Duong,V., Dussart,P., Gromowski,G., Macareo,L., Smith,D., Jarman,R., Whitehead,S., Salje,H., Cummings,D., Lessler,J., Melendrez,M., Endy,T., Kalanarooj,S., A-Nuegoonpipat,A., Chanama,S., Sangkijporn,S., Klungthong,C., Thaisomboonsuk,B., Nisalak,A., Gibbons,R., Iamsirithaworn,S.,…	2021-04-23T00:00:00Z	01318/02	Dengue virus	Flavivirus	Flaviviridae	ssRNA(+)	10175	GenBank	partial	0	Thailand	Thailand	Homo sapiens	0	2002	Dengue virus type 2 isolate 01318/02 polyprotein (POLY) gene, partial cds
MW946334.1	Katzelnick,L., Escoto,A., Huang,A., Garcia-Carreras,B., Chowdhury,N., Berry,I., Chavez,C., Rutvisuttinunt,W., Buchy,P., Duong,V., Dussart,P., Gromowski,G., Macareo,L., Smith,D., Jarman,R., Whitehead,S., Salje,H., Cummings,D., Lessler,J., Melendrez,M., Endy,T., Kalanarooj,S., A-Nuegoonpipat,A., Chanama,S., Sangkijporn,S., Klungthong,C., Thaisomboonsuk,B., Nisalak,A., Gibbons,R., Iamsirithaworn,S.,…	2021-04-23T00:00:00Z	00258/12	Dengue virus	Flavivirus	Flaviviridae	ssRNA(+)	10175	GenBank	partial	0	Thailand	Thailand	Homo sapiens	0	2012	Dengue virus type 2 isolate 00258/12 polyprotein (POLY) gene, partial cds
MW946333.1	Katzelnick,L., Escoto,A., Huang,A., Garcia-Carreras,B., Chowdhury,N., Berry,I., Chavez,C., Rutvisuttinunt,W., Buchy,P., Duong,V., Dussart,P., Gromowski,G., Macareo,L., Smith,D., Jarman,R., Whitehead,S., Salje,H., Cummings,D., Lessler,J., Melendrez,M., Endy,T., Kalanarooj,S., A-Nuegoonpipat,A., Chanama,S., Sangkijporn,S., Klungthong,C., Thaisomboonsuk,B., Nisalak,A., Gibbons,R., Iamsirithaworn,S.,…	2021-04-23T00:00:00Z	01376/98	Dengue virus	Flavivirus	Flaviviridae	ssRNA(+)	10175	GenBank	partial	0	Thailand	Thailand	Homo sapiens	0	1998	Dengue virus type 2 isolate 01376/98 polyprotein (POLY) gene, partial cds
MW946332.1	Katzelnick,L., Escoto,A., Huang,A., Garcia-Carreras,B., Chowdhury,N., Berry,I., Chavez,C., Rutvisuttinunt,W., Buchy,P., Duong,V., Dussart,P., Gromowski,G., Macareo,L., Smith,D., Jarman,R., Whitehead,S., Salje,H., Cummings,D., Lessler,J., Melendrez,M., Endy,T., Kalanarooj,S., A-Nuegoonpipat,A., Chanama,S., Sangkijporn,S., Klungthong,C., Thaisomboonsuk,B., Nisalak,A., Gibbons,R., Iamsirithaworn,S.,…	2021-04-23T00:00:00Z	03510/99	Dengue virus	Flavivirus	Flaviviridae	ssRNA(+)	10175	GenBank	partial	0	Thailand	Thailand	Homo sapiens	0	1999	Dengue virus type 2 isolate 03510/99 polyprotein (POLY) gene, partial cds
MW946331.1	Katzelnick,L., Escoto,A., Huang,A., Garcia-Carreras,B., Chowdhury,N., Berry,I., Chavez,C., Rutvisuttinunt,W., Buchy,P., Duong,V., Dussart,P., Gromowski,G., Macareo,L., Smith,D., Jarman,R., Whitehead,S., Salje,H., Cummings,D., Lessler,J., Melendrez,M., Endy,T., Kalanarooj,S., A-Nuegoonpipat,A., Chanama,S., Sangkijporn,S., Klungthong,C., Thaisomboonsuk,B., Nisalak,A., Gibbons,R., Iamsirithaworn,S.,…	2021-04-23T00:00:00Z	00112/97	Dengue virus	Flavivirus	Flaviviridae	ssRNA(+)	10175	GenBank	partial	0	Thailand	Thailand	Homo sapiens	0	1997	Dengue virus type 2 isolate 00112/97 polyprotein (POLY) gene, partial cds
MW946330.1	Katzelnick,L., Escoto,A., Huang,A., Garcia-Carreras,B., Chowdhury,N., Berry,I., Chavez,C., Rutvisuttinunt,W., Buchy,P., Duong,V., Dussart,P., Gromowski,G., Macareo,L., Smith,D., Jarman,R., Whitehead,S., Salje,H., Cummings,D., Lessler,J., Melendrez,M., Endy,T., Kalanarooj,S., A-Nuegoonpipat,A., Chanama,S., Sangkijporn,S., Klungthong,C., Thaisomboonsuk,B., Nisalak,A., Gibbons,R., Iamsirithaworn,S.,…	2021-04-23T00:00:00Z	01314/02	Dengue virus	Flavivirus	Flaviviridae	ssRNA(+)	10175	GenBank	partial	0	Thailand	Thailand	Homo sapiens	0	2002	Dengue virus type 2 isolate 01314/02 polyprotein (POLY) gene, partial cds
MW946329.1	Katzelnick,L., Escoto,A., Huang,A., Garcia-Carreras,B., Chowdhury,N., Berry,I., Chavez,C., Rutvisuttinunt,W., Buchy,P., Duong,V., Dussart,P., Gromowski,G., Macareo,L., Smith,D., Jarman,R., Whitehead,S., Salje,H., Cummings,D., Lessler,J., Melendrez,M., Endy,T., Kalanarooj,S., A-Nuegoonpipat,A., Chanama,S., Sangkijporn,S., Klungthong,C., Thaisomboonsuk,B., Nisalak,A., Gibbons,R., Iamsirithaworn,S.,…	2021-04-23T00:00:00Z	00242/04	Dengue virus	Flavivirus	Flaviviridae	ssRNA(+)	10175	GenBank	partial	0	Thailand	Thailand	Homo sapiens	0	2004	Dengue virus type 2 isolate 00242/04 polyprotein (POLY) gene, partial cds
MW946328.1	Katzelnick,L., Escoto,A., Huang,A., Garcia-Carreras,B., Chowdhury,N., Berry,I., Chavez,C., Rutvisuttinunt,W., Buchy,P., Duong,V., Dussart,P., Gromowski,G., Macareo,L., Smith,D., Jarman,R., Whitehead,S., Salje,H., Cummings,D., Lessler,J., Melendrez,M., Endy,T., Kalanarooj,S., A-Nuegoonpipat,A., Chanama,S., Sangkijporn,S., Klungthong,C., Thaisomboonsuk,B., Nisalak,A., Gibbons,R., Iamsirithaworn,S.,…	2021-04-23T00:00:00Z	00489/94	Dengue virus	Flavivirus	Flaviviridae	ssRNA(+)	10175	GenBank	partial	0	Thailand	Thailand	Homo sapiens	0	1994	Dengue virus type 2 isolate 00489/94 polyprotein (POLY) gene, partial cds
MW946327.1	Katzelnick,L., Escoto,A., Huang,A., Garcia-Carreras,B., Chowdhury,N., Berry,I., Chavez,C., Rutvisuttinunt,W., Buchy,P., Duong,V., Dussart,P., Gromowski,G., Macareo,L., Smith,D., Jarman,R., Whitehead,S., Salje,H., Cummings,D., Lessler,J., Melendrez,M., Endy,T., Kalanarooj,S., A-Nuegoonpipat,A., Chanama,S., Sangkijporn,S., Klungthong,C., Thaisomboonsuk,B., Nisalak,A., Gibbons,R., Iamsirithaworn,S.,…	2021-04-23T00:00:00Z	00234/95	Dengue virus	Flavivirus	Flaviviridae	ssRNA(+)	10175	GenBank	partial	0	Thailand	Thailand	Homo sapiens	0	1995	Dengue virus type 2 isolate 00234/95 polyprotein (POLY) gene, partial cds
MW946326.1	Katzelnick,L., Escoto,A., Huang,A., Garcia-Carreras,B., Chowdhury,N., Berry,I., Chavez,C., Rutvisuttinunt,W., Buchy,P., Duong,V., Dussart,P., Gromowski,G., Macareo,L., Smith,D., Jarman,R., Whitehead,S., Salje,H., Cummings,D., Lessler,J., Melendrez,M., Endy,T., Kalanarooj,S., A-Nuegoonpipat,A., Chanama,S., Sangkijporn,S., Klungthong,C., Thaisomboonsuk,B., Nisalak,A., Gibbons,R., Iamsirithaworn,S.,…	2021-04-23T00:00:00Z	01090/12	Dengue virus	Flavivirus	Flaviviridae	ssRNA(+)	10175	GenBank	partial	0	Thailand	Thailand	Homo sapiens	0	2012	Dengue virus type 2 isolate 01090/12 polyprotein (POLY) gene, partial cds
MW946325.1	Katzelnick,L., Escoto,A., Huang,A., Garcia-Carreras,B., Chowdhury,N., Berry,I., Chavez,C., Rutvisuttinunt,W., Buchy,P., Duong,V., Dussart,P., Gromowski,G., Macareo,L., Smith,D., Jarman,R., Whitehead,S., Salje,H., Cummings,D., Lessler,J., Melendrez,M., Endy,T., Kalanarooj,S., A-Nuegoonpipat,A., Chanama,S., Sangkijporn,S., Klungthong,C., Thaisomboonsuk,B., Nisalak,A., Gibbons,R., Iamsirithaworn,S.,…	2021-04-23T00:00:00Z	02866/99	Dengue virus	Flavivirus	Flaviviridae	ssRNA(+)	10175	GenBank	partial	0	Thailand	Thailand	Homo sapiens	0	1999	Dengue virus type 2 isolate 02866/99 polyprotein (POLY) gene, partial cds
MW946324.1	Katzelnick,L., Escoto,A., Huang,A., Garcia-Carreras,B., Chowdhury,N., Berry,I., Chavez,C., Rutvisuttinunt,W., Buchy,P., Duong,V., Dussart,P., Gromowski,G., Macareo,L., Smith,D., Jarman,R., Whitehead,S., Salje,H., Cummings,D., Lessler,J., Melendrez,M., Endy,T., Kalanarooj,S., A-Nuegoonpipat,A., Chanama,S., Sangkijporn,S., Klungthong,C., Thaisomboonsuk,B., Nisalak,A., Gibbons,R., Iamsirithaworn,S.,…	2021-04-23T00:00:00Z	01334/05	Dengue virus	Flavivirus	Flaviviridae	ssRNA(+)	10175	GenBank	partial	0	Thailand	Thailand	Homo sapiens	0	2005	Dengue virus type 2 isolate 01334/05 polyprotein (POLY) gene, partial cds
MW946323.1	Katzelnick,L., Escoto,A., Huang,A., Garcia-Carreras,B., Chowdhury,N., Berry,I., Chavez,C., Rutvisuttinunt,W., Buchy,P., Duong,V., Dussart,P., Gromowski,G., Macareo,L., Smith,D., Jarman,R., Whitehead,S., Salje,H., Cummings,D., Lessler,J., Melendrez,M., Endy,T., Kalanarooj,S., A-Nuegoonpipat,A., Chanama,S., Sangkijporn,S., Klungthong,C., Thaisomboonsuk,B., Nisalak,A., Gibbons,R., Iamsirithaworn,S.,…	2021-04-23T00:00:00Z	00269/13	Dengue virus	Flavivirus	Flaviviridae	ssRNA(+)	10175	GenBank	partial	0	Thailand	Thailand	Homo sapiens	0	2013	Dengue virus type 2 isolate 00269/13 polyprotein (POLY) gene, partial cds
MW946322.1	Katzelnick,L., Escoto,A., Huang,A., Garcia-Carreras,B., Chowdhury,N., Berry,I., Chavez,C., Rutvisuttinunt,W., Buchy,P., Duong,V., Dussart,P., Gromowski,G., Macareo,L., Smith,D., Jarman,R., Whitehead,S., Salje,H., Cummings,D., Lessler,J., Melendrez,M., Endy,T., Kalanarooj,S., A-Nuegoonpipat,A., Chanama,S., Sangkijporn,S., Klungthong,C., Thaisomboonsuk,B., Nisalak,A., Gibbons,R., Iamsirithaworn,S.,…	2021-04-23T00:00:00Z	00569/07	Dengue virus	Flavivirus	Flaviviridae	ssRNA(+)	10175	GenBank	partial	0	Thailand	Thailand	Homo sapiens	0	2007	Dengue virus type 2 isolate 00569/07 polyprotein (POLY) gene, partial cds
MW946321.1	Katzelnick,L., Escoto,A., Huang,A., Garcia-Carreras,B., Chowdhury,N., Berry,I., Chavez,C., Rutvisuttinunt,W., Buchy,P., Duong,V., Dussart,P., Gromowski,G., Macareo,L., Smith,D., Jarman,R., Whitehead,S., Salje,H., Cummings,D., Lessler,J., Melendrez,M., Endy,T., Kalanarooj,S., A-Nuegoonpipat,A., Chanama,S., Sangkijporn,S., Klungthong,C., Thaisomboonsuk,B., Nisalak,A., Gibbons,R., Iamsirithaworn,S.,…	2021-04-23T00:00:00Z	02182/06	Dengue virus	Flavivirus	Flaviviridae	ssRNA(+)	10175	GenBank	partial	0	Thailand	Thailand	Homo sapiens	0	2006	Dengue virus type 2 isolate 02182/06 polyprotein (POLY) gene, partial cds
MW946320.1	Katzelnick,L., Escoto,A., Huang,A., Garcia-Carreras,B., Chowdhury,N., Berry,I., Chavez,C., Rutvisuttinunt,W., Buchy,P., Duong,V., Dussart,P., Gromowski,G., Macareo,L., Smith,D., Jarman,R., Whitehead,S., Salje,H., Cummings,D., Lessler,J., Melendrez,M., Endy,T., Kalanarooj,S., A-Nuegoonpipat,A., Chanama,S., Sangkijporn,S., Klungthong,C., Thaisomboonsuk,B., Nisalak,A., Gibbons,R., Iamsirithaworn,S.,…	2021-04-23T00:00:00Z	02518/06	Dengue virus	Flavivirus	Flaviviridae	ssRNA(+)	10175	GenBank	partial	0	Thailand	Thailand	Homo sapiens	0	2006	Dengue virus type 2 isolate 02518/06 polyprotein (POLY) gene, partial cds
MW946319.1	Katzelnick,L., Escoto,A., Huang,A., Garcia-Carreras,B., Chowdhury,N., Berry,I., Chavez,C., Rutvisuttinunt,W., Buchy,P., Duong,V., Dussart,P., Gromowski,G., Macareo,L., Smith,D., Jarman,R., Whitehead,S., Salje,H., Cummings,D., Lessler,J., Melendrez,M., Endy,T., Kalanarooj,S., A-Nuegoonpipat,A., Chanama,S., Sangkijporn,S., Klungthong,C., Thaisomboonsuk,B., Nisalak,A., Gibbons,R., Iamsirithaworn,S.,…	2021-04-23T00:00:00Z	00045/07	Dengue virus	Flavivirus	Flaviviridae	ssRNA(+)	10175	GenBank	partial	0	Thailand	Thailand	Homo sapiens	0	2007	Dengue virus type 2 isolate 00045/07 polyprotein (POLY) gene, partial cds
MW946318.1	Katzelnick,L., Escoto,A., Huang,A., Garcia-Carreras,B., Chowdhury,N., Berry,I., Chavez,C., Rutvisuttinunt,W., Buchy,P., Duong,V., Dussart,P., Gromowski,G., Macareo,L., Smith,D., Jarman,R., Whitehead,S., Salje,H., Cummings,D., Lessler,J., Melendrez,M., Endy,T., Kalanarooj,S., A-Nuegoonpipat,A., Chanama,S., Sangkijporn,S., Klungthong,C., Thaisomboonsuk,B., Nisalak,A., Gibbons,R., Iamsirithaworn,S.,…	2021-04-23T00:00:00Z	00697/06	Dengue virus	Flavivirus	Flaviviridae	ssRNA(+)	10175	GenBank	partial	0	Thailand	Thailand	Homo sapiens	0	2006	Dengue virus type 2 isolate 00697/06 polyprotein (POLY) gene, partial cds
MW946317.1	Katzelnick,L., Escoto,A., Huang,A., Garcia-Carreras,B., Chowdhury,N., Berry,I., Chavez,C., Rutvisuttinunt,W., Buchy,P., Duong,V., Dussart,P., Gromowski,G., Macareo,L., Smith,D., Jarman,R., Whitehead,S., Salje,H., Cummings,D., Lessler,J., Melendrez,M., Endy,T., Kalanarooj,S., A-Nuegoonpipat,A., Chanama,S., Sangkijporn,S., Klungthong,C., Thaisomboonsuk,B., Nisalak,A., Gibbons,R., Iamsirithaworn,S.,…	2021-04-23T00:00:00Z	05157/97	Dengue virus	Flavivirus	Flaviviridae	ssRNA(+)	10175	GenBank	partial	0	Thailand	Thailand	Homo sapiens	0	1997	Dengue virus type 2 isolate 05157/97 polyprotein (POLY) gene, partial cds
MW946316.1	Katzelnick,L., Escoto,A., Huang,A., Garcia-Carreras,B., Chowdhury,N., Berry,I., Chavez,C., Rutvisuttinunt,W., Buchy,P., Duong,V., Dussart,P., Gromowski,G., Macareo,L., Smith,D., Jarman,R., Whitehead,S., Salje,H., Cummings,D., Lessler,J., Melendrez,M., Endy,T., Kalanarooj,S., A-Nuegoonpipat,A., Chanama,S., Sangkijporn,S., Klungthong,C., Thaisomboonsuk,B., Nisalak,A., Gibbons,R., Iamsirithaworn,S.,…	2021-04-23T00:00:00Z	00289/06	Dengue virus	Flavivirus	Flaviviridae	ssRNA(+)	10175	GenBank	partial	0	Thailand	Thailand	Homo sapiens	0	2006	Dengue virus type 2 isolate 00289/06 polyprotein (POLY) gene, partial cds
MW946315.1	Katzelnick,L., Escoto,A., Huang,A., Garcia-Carreras,B., Chowdhury,N., Berry,I., Chavez,C., Rutvisuttinunt,W., Buchy,P., Duong,V., Dussart,P., Gromowski,G., Macareo,L., Smith,D., Jarman,R., Whitehead,S., Salje,H., Cummings,D., Lessler,J., Melendrez,M., Endy,T., Kalanarooj,S., A-Nuegoonpipat,A., Chanama,S., Sangkijporn,S., Klungthong,C., Thaisomboonsuk,B., Nisalak,A., Gibbons,R., Iamsirithaworn,S.,…	2021-04-23T00:00:00Z	07854/97	Dengue virus	Flavivirus	Flaviviridae	ssRNA(+)	10175	GenBank	partial	0	Thailand	Thailand	Homo sapiens	0	1997	Dengue virus type 2 isolate 07854/97 polyprotein (POLY) gene, partial cds
MW946314.1	Katzelnick,L., Escoto,A., Huang,A., Garcia-Carreras,B., Chowdhury,N., Berry,I., Chavez,C., Rutvisuttinunt,W., Buchy,P., Duong,V., Dussart,P., Gromowski,G., Macareo,L., Smith,D., Jarman,R., Whitehead,S., Salje,H., Cummings,D., Lessler,J., Melendrez,M., Endy,T., Kalanarooj,S., A-Nuegoonpipat,A., Chanama,S., Sangkijporn,S., Klungthong,C., Thaisomboonsuk,B., Nisalak,A., Gibbons,R., Iamsirithaworn,S.,…	2021-04-23T00:00:00Z	00225/13	Dengue virus	Flavivirus	Flaviviridae	ssRNA(+)	10175	GenBank	partial	0	Thailand	Thailand	Homo sapiens	0	2013	Dengue virus type 2 isolate 00225/13 polyprotein (POLY) gene, partial cds
MW946313.1	Katzelnick,L., Escoto,A., Huang,A., Garcia-Carreras,B., Chowdhury,N., Berry,I., Chavez,C., Rutvisuttinunt,W., Buchy,P., Duong,V., Dussart,P., Gromowski,G., Macareo,L., Smith,D., Jarman,R., Whitehead,S., Salje,H., Cummings,D., Lessler,J., Melendrez,M., Endy,T., Kalanarooj,S., A-Nuegoonpipat,A., Chanama,S., Sangkijporn,S., Klungthong,C., Thaisomboonsuk,B., Nisalak,A., Gibbons,R., Iamsirithaworn,S.,…	2021-04-23T00:00:00Z	00647/06	Dengue virus	Flavivirus	Flaviviridae	ssRNA(+)	10175	GenBank	partial	0	Thailand	Thailand	Homo sapiens	0	2006	Dengue virus type 2 isolate 00647/06 polyprotein (POLY) gene, partial cds
MW946312.1	Katzelnick,L., Escoto,A., Huang,A., Garcia-Carreras,B., Chowdhury,N., Berry,I., Chavez,C., Rutvisuttinunt,W., Buchy,P., Duong,V., Dussart,P., Gromowski,G., Macareo,L., Smith,D., Jarman,R., Whitehead,S., Salje,H., Cummings,D., Lessler,J., Melendrez,M., Endy,T., Kalanarooj,S., A-Nuegoonpipat,A., Chanama,S., Sangkijporn,S., Klungthong,C., Thaisomboonsuk,B., Nisalak,A., Gibbons,R., Iamsirithaworn,S.,…	2021-04-23T00:00:00Z	05855/00	Dengue virus	Flavivirus	Flaviviridae	ssRNA(+)	10175	GenBank	partial	0	Thailand	Thailand	Homo sapiens	0	2000	Dengue virus type 2 isolate 05855/00 polyprotein (POLY) gene, partial cds
MW946311.1	Katzelnick,L., Escoto,A., Huang,A., Garcia-Carreras,B., Chowdhury,N., Berry,I., Chavez,C., Rutvisuttinunt,W., Buchy,P., Duong,V., Dussart,P., Gromowski,G., Macareo,L., Smith,D., Jarman,R., Whitehead,S., Salje,H., Cummings,D., Lessler,J., Melendrez,M., Endy,T., Kalanarooj,S., A-Nuegoonpipat,A., Chanama,S., Sangkijporn,S., Klungthong,C., Thaisomboonsuk,B., Nisalak,A., Gibbons,R., Iamsirithaworn,S.,…	2021-04-23T00:00:00Z	00664/04	Dengue virus	Flavivirus	Flaviviridae	ssRNA(+)	10175	GenBank	partial	0	Thailand	Thailand	Homo sapiens	0	2004	Dengue virus type 2 isolate 00664/04 polyprotein (POLY) gene, partial cds
MW946310.1	Katzelnick,L., Escoto,A., Huang,A., Garcia-Carreras,B., Chowdhury,N., Berry,I., Chavez,C., Rutvisuttinunt,W., Buchy,P., Duong,V., Dussart,P., Gromowski,G., Macareo,L., Smith,D., Jarman,R., Whitehead,S., Salje,H., Cummings,D., Lessler,J., Melendrez,M., Endy,T., Kalanarooj,S., A-Nuegoonpipat,A., Chanama,S., Sangkijporn,S., Klungthong,C., Thaisomboonsuk,B., Nisalak,A., Gibbons,R., Iamsirithaworn,S.,…	2021-04-23T00:00:00Z	01565/98	Dengue virus	Flavivirus	Flaviviridae	ssRNA(+)	10175	GenBank	partial	0	Thailand	Thailand	Homo sapiens	0	1998	Dengue virus type 2 isolate 01565/98 polyprotein (POLY) gene, partial cds
MW946309.1	Katzelnick,L., Escoto,A., Huang,A., Garcia-Carreras,B., Chowdhury,N., Berry,I., Chavez,C., Rutvisuttinunt,W., Buchy,P., Duong,V., Dussart,P., Gromowski,G., Macareo,L., Smith,D., Jarman,R., Whitehead,S., Salje,H., Cummings,D., Lessler,J., Melendrez,M., Endy,T., Kalanarooj,S., A-Nuegoonpipat,A., Chanama,S., Sangkijporn,S., Klungthong,C., Thaisomboonsuk,B., Nisalak,A., Gibbons,R., Iamsirithaworn,S.,…	2021-04-23T00:00:00Z	01462/04	Dengue virus	Flavivirus	Flaviviridae	ssRNA(+)	10175	GenBank	partial	0	Thailand	Thailand	Homo sapiens	0	2004	Dengue virus type 2 isolate 01462/04 polyprotein (POLY) gene, partial cds
MW946308.1	Katzelnick,L., Escoto,A., Huang,A., Garcia-Carreras,B., Chowdhury,N., Berry,I., Chavez,C., Rutvisuttinunt,W., Buchy,P., Duong,V., Dussart,P., Gromowski,G., Macareo,L., Smith,D., Jarman,R., Whitehead,S., Salje,H., Cummings,D., Lessler,J., Melendrez,M., Endy,T., Kalanarooj,S., A-Nuegoonpipat,A., Chanama,S., Sangkijporn,S., Klungthong,C., Thaisomboonsuk,B., Nisalak,A., Gibbons,R., Iamsirithaworn,S.,…	2021-04-23T00:00:00Z	06771/98	Dengue virus	Flavivirus	Flaviviridae	ssRNA(+)	10175	GenBank	partial	0	Thailand	Thailand	Homo sapiens	0	1998	Dengue virus type 2 isolate 06771/98 polyprotein (POLY) gene, partial cds
MW946307.1	Katzelnick,L., Escoto,A., Huang,A., Garcia-Carreras,B., Chowdhury,N., Berry,I., Chavez,C., Rutvisuttinunt,W., Buchy,P., Duong,V., Dussart,P., Gromowski,G., Macareo,L., Smith,D., Jarman,R., Whitehead,S., Salje,H., Cummings,D., Lessler,J., Melendrez,M., Endy,T., Kalanarooj,S., A-Nuegoonpipat,A., Chanama,S., Sangkijporn,S., Klungthong,C., Thaisomboonsuk,B., Nisalak,A., Gibbons,R., Iamsirithaworn,S.,…	2021-04-23T00:00:00Z	06009/00	Dengue virus	Flavivirus	Flaviviridae	ssRNA(+)	10175	GenBank	partial	0	Thailand	Thailand	Homo sapiens	0	2000	Dengue virus type 2 isolate 06009/00 polyprotein (POLY) gene, partial cds
MW946306.1	Katzelnick,L., Escoto,A., Huang,A., Garcia-Carreras,B., Chowdhury,N., Berry,I., Chavez,C., Rutvisuttinunt,W., Buchy,P., Duong,V., Dussart,P., Gromowski,G., Macareo,L., Smith,D., Jarman,R., Whitehead,S., Salje,H., Cummings,D., Lessler,J., Melendrez,M., Endy,T., Kalanarooj,S., A-Nuegoonpipat,A., Chanama,S., Sangkijporn,S., Klungthong,C., Thaisomboonsuk,B., Nisalak,A., Gibbons,R., Iamsirithaworn,S.,…	2021-04-23T00:00:00Z	03333/99	Dengue virus	Flavivirus	Flaviviridae	ssRNA(+)	10175	GenBank	partial	0	Thailand	Thailand	Homo sapiens	0	1999	Dengue virus type 2 isolate 03333/99 polyprotein (POLY) gene, partial cds
MW946305.1	Katzelnick,L., Escoto,A., Huang,A., Garcia-Carreras,B., Chowdhury,N., Berry,I., Chavez,C., Rutvisuttinunt,W., Buchy,P., Duong,V., Dussart,P., Gromowski,G., Macareo,L., Smith,D., Jarman,R., Whitehead,S., Salje,H., Cummings,D., Lessler,J., Melendrez,M., Endy,T., Kalanarooj,S., A-Nuegoonpipat,A., Chanama,S., Sangkijporn,S., Klungthong,C., Thaisomboonsuk,B., Nisalak,A., Gibbons,R., Iamsirithaworn,S.,…	2021-04-23T00:00:00Z	02108/07	Dengue virus	Flavivirus	Flaviviridae	ssRNA(+)	10175	GenBank	partial	0	Thailand	Thailand	Homo sapiens	0	2007	Dengue virus type 2 isolate 02108/07 polyprotein (POLY) gene, partial cds
MW946304.1	Katzelnick,L., Escoto,A., Huang,A., Garcia-Carreras,B., Chowdhury,N., Berry,I., Chavez,C., Rutvisuttinunt,W., Buchy,P., Duong,V., Dussart,P., Gromowski,G., Macareo,L., Smith,D., Jarman,R., Whitehead,S., Salje,H., Cummings,D., Lessler,J., Melendrez,M., Endy,T., Kalanarooj,S., A-Nuegoonpipat,A., Chanama,S., Sangkijporn,S., Klungthong,C., Thaisomboonsuk,B., Nisalak,A., Gibbons,R., Iamsirithaworn,S.,…	2021-04-23T00:00:00Z	01092/12	Dengue virus	Flavivirus	Flaviviridae	ssRNA(+)	10175	GenBank	partial	0	Thailand	Thailand	Homo sapiens	0	2012	Dengue virus type 2 isolate 01092/12 polyprotein (POLY) gene, partial cds
MW946303.1	Katzelnick,L., Escoto,A., Huang,A., Garcia-Carreras,B., Chowdhury,N., Berry,I., Chavez,C., Rutvisuttinunt,W., Buchy,P., Duong,V., Dussart,P., Gromowski,G., Macareo,L., Smith,D., Jarman,R., Whitehead,S., Salje,H., Cummings,D., Lessler,J., Melendrez,M., Endy,T., Kalanarooj,S., A-Nuegoonpipat,A., Chanama,S., Sangkijporn,S., Klungthong,C., Thaisomboonsuk,B., Nisalak,A., Gibbons,R., Iamsirithaworn,S.,…	2021-04-23T00:00:00Z	05692/00	Dengue virus	Flavivirus	Flaviviridae	ssRNA(+)	10175	GenBank	partial	0	Thailand	Thailand	Homo sapiens	0	2000	Dengue virus type 2 isolate 05692/00 polyprotein (POLY) gene, partial cds
MW946302.1	Katzelnick,L., Escoto,A., Huang,A., Garcia-Carreras,B., Chowdhury,N., Berry,I., Chavez,C., Rutvisuttinunt,W., Buchy,P., Duong,V., Dussart,P., Gromowski,G., Macareo,L., Smith,D., Jarman,R., Whitehead,S., Salje,H., Cummings,D., Lessler,J., Melendrez,M., Endy,T., Kalanarooj,S., A-Nuegoonpipat,A., Chanama,S., Sangkijporn,S., Klungthong,C., Thaisomboonsuk,B., Nisalak,A., Gibbons,R., Iamsirithaworn,S.,…	2021-04-23T00:00:00Z	00335/07	Dengue virus	Flavivirus	Flaviviridae	ssRNA(+)	10175	GenBank	partial	0	Thailand	Thailand	Homo sapiens	0	2007	Dengue virus type 2 isolate 00335/07 polyprotein (POLY) gene, partial cds
MW946301.1	Katzelnick,L., Escoto,A., Huang,A., Garcia-Carreras,B., Chowdhury,N., Berry,I., Chavez,C., Rutvisuttinunt,W., Buchy,P., Duong,V., Dussart,P., Gromowski,G., Macareo,L., Smith,D., Jarman,R., Whitehead,S., Salje,H., Cummings,D., Lessler,J., Melendrez,M., Endy,T., Kalanarooj,S., A-Nuegoonpipat,A., Chanama,S., Sangkijporn,S., Klungthong,C., Thaisomboonsuk,B., Nisalak,A., Gibbons,R., Iamsirithaworn,S.,…	2021-04-23T00:00:00Z	05894/00	Dengue virus	Flavivirus	Flaviviridae	ssRNA(+)	10175	GenBank	partial	0	Thailand	Thailand	Homo sapiens	0	2000	Dengue virus type 2 isolate 05894/00 polyprotein (POLY) gene, partial cds
MW946300.1	Katzelnick,L., Escoto,A., Huang,A., Garcia-Carreras,B., Chowdhury,N., Berry,I., Chavez,C., Rutvisuttinunt,W., Buchy,P., Duong,V., Dussart,P., Gromowski,G., Macareo,L., Smith,D., Jarman,R., Whitehead,S., Salje,H., Cummings,D., Lessler,J., Melendrez,M., Endy,T., Kalanarooj,S., A-Nuegoonpipat,A., Chanama,S., Sangkijporn,S., Klungthong,C., Thaisomboonsuk,B., Nisalak,A., Gibbons,R., Iamsirithaworn,S.,…	2021-04-23T00:00:00Z	00753/11	Dengue virus	Flavivirus	Flaviviridae	ssRNA(+)	10175	GenBank	partial	0	Thailand	Thailand	Homo sapiens	0	2011	Dengue virus type 2 isolate 00753/11 polyprotein (POLY) gene, partial cds
MW946299.1	Katzelnick,L., Escoto,A., Huang,A., Garcia-Carreras,B., Chowdhury,N., Berry,I., Chavez,C., Rutvisuttinunt,W., Buchy,P., Duong,V., Dussart,P., Gromowski,G., Macareo,L., Smith,D., Jarman,R., Whitehead,S., Salje,H., Cummings,D., Lessler,J., Melendrez,M., Endy,T., Kalanarooj,S., A-Nuegoonpipat,A., Chanama,S., Sangkijporn,S., Klungthong,C., Thaisomboonsuk,B., Nisalak,A., Gibbons,R., Iamsirithaworn,S.,…	2021-04-23T00:00:00Z	03130/02	Dengue virus	Flavivirus	Flaviviridae	ssRNA(+)	10175	GenBank	partial	0	Thailand	Thailand	Homo sapiens	0	2002	Dengue virus type 2 isolate 03130/02 polyprotein (POLY) gene, partial cds
MW946298.1	Katzelnick,L., Escoto,A., Huang,A., Garcia-Carreras,B., Chowdhury,N., Berry,I., Chavez,C., Rutvisuttinunt,W., Buchy,P., Duong,V., Dussart,P., Gromowski,G., Macareo,L., Smith,D., Jarman,R., Whitehead,S., Salje,H., Cummings,D., Lessler,J., Melendrez,M., Endy,T., Kalanarooj,S., A-Nuegoonpipat,A., Chanama,S., Sangkijporn,S., Klungthong,C., Thaisomboonsuk,B., Nisalak,A., Gibbons,R., Iamsirithaworn,S.,…	2021-04-23T00:00:00Z	00945/96	Dengue virus	Flavivirus	Flaviviridae	ssRNA(+)	10175	GenBank	partial	0	Thailand	Thailand	Homo sapiens	0	1996	Dengue virus type 2 isolate 00945/96 polyprotein (POLY) gene, partial cds
MW946297.1	Katzelnick,L., Escoto,A., Huang,A., Garcia-Carreras,B., Chowdhury,N., Berry,I., Chavez,C., Rutvisuttinunt,W., Buchy,P., Duong,V., Dussart,P., Gromowski,G., Macareo,L., Smith,D., Jarman,R., Whitehead,S., Salje,H., Cummings,D., Lessler,J., Melendrez,M., Endy,T., Kalanarooj,S., A-Nuegoonpipat,A., Chanama,S., Sangkijporn,S., Klungthong,C., Thaisomboonsuk,B., Nisalak,A., Gibbons,R., Iamsirithaworn,S.,…	2021-04-23T00:00:00Z	00901/05	Dengue virus	Flavivirus	Flaviviridae	ssRNA(+)	10175	GenBank	partial	0	Thailand	Thailand	Homo sapiens	0	2005	Dengue virus type 2 isolate 00901/05 polyprotein (POLY) gene, partial cds
MW946296.1	Katzelnick,L., Escoto,A., Huang,A., Garcia-Carreras,B., Chowdhury,N., Berry,I., Chavez,C., Rutvisuttinunt,W., Buchy,P., Duong,V., Dussart,P., Gromowski,G., Macareo,L., Smith,D., Jarman,R., Whitehead,S., Salje,H., Cummings,D., Lessler,J., Melendrez,M., Endy,T., Kalanarooj,S., A-Nuegoonpipat,A., Chanama,S., Sangkijporn,S., Klungthong,C., Thaisomboonsuk,B., Nisalak,A., Gibbons,R., Iamsirithaworn,S.,…	2021-04-23T00:00:00Z	05882/00	Dengue virus	Flavivirus	Flaviviridae	ssRNA(+)	10175	GenBank	partial	0	Thailand	Thailand	Homo sapiens	0	2000	Dengue virus type 2 isolate 05882/00 polyprotein (POLY) gene, partial cds
MW946295.1	Katzelnick,L., Escoto,A., Huang,A., Garcia-Carreras,B., Chowdhury,N., Berry,I., Chavez,C., Rutvisuttinunt,W., Buchy,P., Duong,V., Dussart,P., Gromowski,G., Macareo,L., Smith,D., Jarman,R., Whitehead,S., Salje,H., Cummings,D., Lessler,J., Melendrez,M., Endy,T., Kalanarooj,S., A-Nuegoonpipat,A., Chanama,S., Sangkijporn,S., Klungthong,C., Thaisomboonsuk,B., Nisalak,A., Gibbons,R., Iamsirithaworn,S.,…	2021-04-23T00:00:00Z	02126/96	Dengue virus	Flavivirus	Flaviviridae	ssRNA(+)	10175	GenBank	partial	0	Thailand	Thailand	Homo sapiens	0	1996	Dengue virus type 2 isolate 02126/96 polyprotein (POLY) gene, partial cds
MW946294.1	Katzelnick,L., Escoto,A., Huang,A., Garcia-Carreras,B., Chowdhury,N., Berry,I., Chavez,C., Rutvisuttinunt,W., Buchy,P., Duong,V., Dussart,P., Gromowski,G., Macareo,L., Smith,D., Jarman,R., Whitehead,S., Salje,H., Cummings,D., Lessler,J., Melendrez,M., Endy,T., Kalanarooj,S., A-Nuegoonpipat,A., Chanama,S., Sangkijporn,S., Klungthong,C., Thaisomboonsuk,B., Nisalak,A., Gibbons,R., Iamsirithaworn,S.,…	2021-04-23T00:00:00Z	02180/00	Dengue virus	Flavivirus	Flaviviridae	ssRNA(+)	10175	GenBank	partial	0	Thailand	Thailand	Homo sapiens	0	2000	Dengue virus type 2 isolate 02180/00 polyprotein (POLY) gene, partial cds
MW946293.1	Katzelnick,L., Escoto,A., Huang,A., Garcia-Carreras,B., Chowdhury,N., Berry,I., Chavez,C., Rutvisuttinunt,W., Buchy,P., Duong,V., Dussart,P., Gromowski,G., Macareo,L., Smith,D., Jarman,R., Whitehead,S., Salje,H., Cummings,D., Lessler,J., Melendrez,M., Endy,T., Kalanarooj,S., A-Nuegoonpipat,A., Chanama,S., Sangkijporn,S., Klungthong,C., Thaisomboonsuk,B., Nisalak,A., Gibbons,R., Iamsirithaworn,S.,…	2021-04-23T00:00:00Z	05012/01	Dengue virus	Flavivirus	Flaviviridae	ssRNA(+)	10175	GenBank	partial	0	Thailand	Thailand	Homo sapiens	0	2001	Dengue virus type 2 isolate 05012/01 polyprotein (POLY) gene, partial cds
MW946292.1	Katzelnick,L., Escoto,A., Huang,A., Garcia-Carreras,B., Chowdhury,N., Berry,I., Chavez,C., Rutvisuttinunt,W., Buchy,P., Duong,V., Dussart,P., Gromowski,G., Macareo,L., Smith,D., Jarman,R., Whitehead,S., Salje,H., Cummings,D., Lessler,J., Melendrez,M., Endy,T., Kalanarooj,S., A-Nuegoonpipat,A., Chanama,S., Sangkijporn,S., Klungthong,C., Thaisomboonsuk,B., Nisalak,A., Gibbons,R., Iamsirithaworn,S.,…	2021-04-23T00:00:00Z	00016/06	Dengue virus	Flavivirus	Flaviviridae	ssRNA(+)	10175	GenBank	partial	0	Thailand	Thailand	Homo sapiens	0	2006	Dengue virus type 2 isolate 00016/06 polyprotein (POLY) gene, partial cds
MW946291.1	Katzelnick,L., Escoto,A., Huang,A., Garcia-Carreras,B., Chowdhury,N., Berry,I., Chavez,C., Rutvisuttinunt,W., Buchy,P., Duong,V., Dussart,P., Gromowski,G., Macareo,L., Smith,D., Jarman,R., Whitehead,S., Salje,H., Cummings,D., Lessler,J., Melendrez,M., Endy,T., Kalanarooj,S., A-Nuegoonpipat,A., Chanama,S., Sangkijporn,S., Klungthong,C., Thaisomboonsuk,B., Nisalak,A., Gibbons,R., Iamsirithaworn,S.,…	2021-04-23T00:00:00Z	01644/06	Dengue virus	Flavivirus	Flaviviridae	ssRNA(+)	10175	GenBank	partial	0	Thailand	Thailand	Homo sapiens	0	2006	Dengue virus type 2 isolate 01644/06 polyprotein (POLY) gene, partial cds
MW946290.1	Katzelnick,L., Escoto,A., Huang,A., Garcia-Carreras,B., Chowdhury,N., Berry,I., Chavez,C., Rutvisuttinunt,W., Buchy,P., Duong,V., Dussart,P., Gromowski,G., Macareo,L., Smith,D., Jarman,R., Whitehead,S., Salje,H., Cummings,D., Lessler,J., Melendrez,M., Endy,T., Kalanarooj,S., A-Nuegoonpipat,A., Chanama,S., Sangkijporn,S., Klungthong,C., Thaisomboonsuk,B., Nisalak,A., Gibbons,R., Iamsirithaworn,S.,…	2021-04-23T00:00:00Z	03412/97	Dengue virus	Flavivirus	Flaviviridae	ssRNA(+)	10175	GenBank	partial	0	Thailand	Thailand	Homo sapiens	0	1997	Dengue virus type 2 isolate 03412/97 polyprotein (POLY) gene, partial cds
MW946289.1	Katzelnick,L., Escoto,A., Huang,A., Garcia-Carreras,B., Chowdhury,N., Berry,I., Chavez,C., Rutvisuttinunt,W., Buchy,P., Duong,V., Dussart,P., Gromowski,G., Macareo,L., Smith,D., Jarman,R., Whitehead,S., Salje,H., Cummings,D., Lessler,J., Melendrez,M., Endy,T., Kalanarooj,S., A-Nuegoonpipat,A., Chanama,S., Sangkijporn,S., Klungthong,C., Thaisomboonsuk,B., Nisalak,A., Gibbons,R., Iamsirithaworn,S.,…	2021-04-23T00:00:00Z	02933/02	Dengue virus	Flavivirus	Flaviviridae	ssRNA(+)	10175	GenBank	partial	0	Thailand	Thailand	Homo sapiens	0	2002	Dengue virus type 2 isolate 02933/02 polyprotein (POLY) gene, partial cds
MW946288.1	Katzelnick,L., Escoto,A., Huang,A., Garcia-Carreras,B., Chowdhury,N., Berry,I., Chavez,C., Rutvisuttinunt,W., Buchy,P., Duong,V., Dussart,P., Gromowski,G., Macareo,L., Smith,D., Jarman,R., Whitehead,S., Salje,H., Cummings,D., Lessler,J., Melendrez,M., Endy,T., Kalanarooj,S., A-Nuegoonpipat,A., Chanama,S., Sangkijporn,S., Klungthong,C., Thaisomboonsuk,B., Nisalak,A., Gibbons,R., Iamsirithaworn,S.,…	2021-04-23T00:00:00Z	01326/00	Dengue virus	Flavivirus	Flaviviridae	ssRNA(+)	10175	GenBank	partial	0	Thailand	Thailand	Homo sapiens	0	2000	Dengue virus type 2 isolate 01326/00 polyprotein (POLY) gene, partial cds
MW946287.1	Katzelnick,L., Escoto,A., Huang,A., Garcia-Carreras,B., Chowdhury,N., Berry,I., Chavez,C., Rutvisuttinunt,W., Buchy,P., Duong,V., Dussart,P., Gromowski,G., Macareo,L., Smith,D., Jarman,R., Whitehead,S., Salje,H., Cummings,D., Lessler,J., Melendrez,M., Endy,T., Kalanarooj,S., A-Nuegoonpipat,A., Chanama,S., Sangkijporn,S., Klungthong,C., Thaisomboonsuk,B., Nisalak,A., Gibbons,R., Iamsirithaworn,S.,…	2021-04-23T00:00:00Z	00589/95	Dengue virus	Flavivirus	Flaviviridae	ssRNA(+)	10175	GenBank	partial	0	Thailand	Thailand	Homo sapiens	0	1995	Dengue virus type 2 isolate 00589/95 polyprotein (POLY) gene, partial cds
MW946286.1	Katzelnick,L., Escoto,A., Huang,A., Garcia-Carreras,B., Chowdhury,N., Berry,I., Chavez,C., Rutvisuttinunt,W., Buchy,P., Duong,V., Dussart,P., Gromowski,G., Macareo,L., Smith,D., Jarman,R., Whitehead,S., Salje,H., Cummings,D., Lessler,J., Melendrez,M., Endy,T., Kalanarooj,S., A-Nuegoonpipat,A., Chanama,S., Sangkijporn,S., Klungthong,C., Thaisomboonsuk,B., Nisalak,A., Gibbons,R., Iamsirithaworn,S.,…	2021-04-23T00:00:00Z	00826/12	Dengue virus	Flavivirus	Flaviviridae	ssRNA(+)	10174	GenBank	partial	0	Thailand	Thailand	Homo sapiens	0	2012	Dengue virus type 2 isolate 00826/12 polyprotein (POLY) gene, partial cds
MW946285.1	Katzelnick,L., Escoto,A., Huang,A., Garcia-Carreras,B., Chowdhury,N., Berry,I., Chavez,C., Rutvisuttinunt,W., Buchy,P., Duong,V., Dussart,P., Gromowski,G., Macareo,L., Smith,D., Jarman,R., Whitehead,S., Salje,H., Cummings,D., Lessler,J., Melendrez,M., Endy,T., Kalanarooj,S., A-Nuegoonpipat,A., Chanama,S., Sangkijporn,S., Klungthong,C., Thaisomboonsuk,B., Nisalak,A., Gibbons,R., Iamsirithaworn,S.,…	2021-04-23T00:00:00Z	00695/06	Dengue virus	Flavivirus	Flaviviridae	ssRNA(+)	10175	GenBank	partial	0	Thailand	Thailand	Homo sapiens	0	2006	Dengue virus type 2 isolate 00695/06 polyprotein (POLY) gene, partial cds
MW946284.1	Katzelnick,L., Escoto,A., Huang,A., Garcia-Carreras,B., Chowdhury,N., Berry,I., Chavez,C., Rutvisuttinunt,W., Buchy,P., Duong,V., Dussart,P., Gromowski,G., Macareo,L., Smith,D., Jarman,R., Whitehead,S., Salje,H., Cummings,D., Lessler,J., Melendrez,M., Endy,T., Kalanarooj,S., A-Nuegoonpipat,A., Chanama,S., Sangkijporn,S., Klungthong,C., Thaisomboonsuk,B., Nisalak,A., Gibbons,R., Iamsirithaworn,S.,…	2021-04-23T00:00:00Z	00672/95	Dengue virus	Flavivirus	Flaviviridae	ssRNA(+)	10175	GenBank	partial	0	Thailand	Thailand	Homo sapiens	0	1995	Dengue virus type 2 isolate 00672/95 polyprotein (POLY) gene, partial cds
MW946283.1	Katzelnick,L., Escoto,A., Huang,A., Garcia-Carreras,B., Chowdhury,N., Berry,I., Chavez,C., Rutvisuttinunt,W., Buchy,P., Duong,V., Dussart,P., Gromowski,G., Macareo,L., Smith,D., Jarman,R., Whitehead,S., Salje,H., Cummings,D., Lessler,J., Melendrez,M., Endy,T., Kalanarooj,S., A-Nuegoonpipat,A., Chanama,S., Sangkijporn,S., Klungthong,C., Thaisomboonsuk,B., Nisalak,A., Gibbons,R., Iamsirithaworn,S.,…	2021-04-23T00:00:00Z	03093/99	Dengue virus	Flavivirus	Flaviviridae	ssRNA(+)	10175	GenBank	partial	0	Thailand	Thailand	Homo sapiens	0	1999	Dengue virus type 2 isolate 03093/99 polyprotein (POLY) gene, partial cds
MW946282.1	Katzelnick,L., Escoto,A., Huang,A., Garcia-Carreras,B., Chowdhury,N., Berry,I., Chavez,C., Rutvisuttinunt,W., Buchy,P., Duong,V., Dussart,P., Gromowski,G., Macareo,L., Smith,D., Jarman,R., Whitehead,S., Salje,H., Cummings,D., Lessler,J., Melendrez,M., Endy,T., Kalanarooj,S., A-Nuegoonpipat,A., Chanama,S., Sangkijporn,S., Klungthong,C., Thaisomboonsuk,B., Nisalak,A., Gibbons,R., Iamsirithaworn,S.,…	2021-04-23T00:00:00Z	01163/96	Dengue virus	Flavivirus	Flaviviridae	ssRNA(+)	10175	GenBank	partial	0	Thailand	Thailand	Homo sapiens	0	1996	Dengue virus type 2 isolate 01163/96 polyprotein (POLY) gene, partial cds
MW946281.1	Katzelnick,L., Escoto,A., Huang,A., Garcia-Carreras,B., Chowdhury,N., Berry,I., Chavez,C., Rutvisuttinunt,W., Buchy,P., Duong,V., Dussart,P., Gromowski,G., Macareo,L., Smith,D., Jarman,R., Whitehead,S., Salje,H., Cummings,D., Lessler,J., Melendrez,M., Endy,T., Kalanarooj,S., A-Nuegoonpipat,A., Chanama,S., Sangkijporn,S., Klungthong,C., Thaisomboonsuk,B., Nisalak,A., Gibbons,R., Iamsirithaworn,S.,…	2021-04-23T00:00:00Z	00977/03	Dengue virus	Flavivirus	Flaviviridae	ssRNA(+)	10175	GenBank	partial	0	Thailand	Thailand	Homo sapiens	0	2003	Dengue virus type 2 isolate 00977/03 polyprotein (POLY) gene, partial cds
MW946280.1	Katzelnick,L., Escoto,A., Huang,A., Garcia-Carreras,B., Chowdhury,N., Berry,I., Chavez,C., Rutvisuttinunt,W., Buchy,P., Duong,V., Dussart,P., Gromowski,G., Macareo,L., Smith,D., Jarman,R., Whitehead,S., Salje,H., Cummings,D., Lessler,J., Melendrez,M., Endy,T., Kalanarooj,S., A-Nuegoonpipat,A., Chanama,S., Sangkijporn,S., Klungthong,C., Thaisomboonsuk,B., Nisalak,A., Gibbons,R., Iamsirithaworn,S.,…	2021-04-23T00:00:00Z	01109/04	Dengue virus	Flavivirus	Flaviviridae	ssRNA(+)	10175	GenBank	partial	0	Thailand	Thailand	Homo sapiens	0	2004	Dengue virus type 2 isolate 01109/04 polyprotein (POLY) gene, partial cds
MW946279.1	Katzelnick,L., Escoto,A., Huang,A., Garcia-Carreras,B., Chowdhury,N., Berry,I., Chavez,C., Rutvisuttinunt,W., Buchy,P., Duong,V., Dussart,P., Gromowski,G., Macareo,L., Smith,D., Jarman,R., Whitehead,S., Salje,H., Cummings,D., Lessler,J., Melendrez,M., Endy,T., Kalanarooj,S., A-Nuegoonpipat,A., Chanama,S., Sangkijporn,S., Klungthong,C., Thaisomboonsuk,B., Nisalak,A., Gibbons,R., Iamsirithaworn,S.,…	2021-04-23T00:00:00Z	04089/01	Dengue virus	Flavivirus	Flaviviridae	ssRNA(+)	10175	GenBank	partial	0	Thailand	Thailand	Homo sapiens	0	2001	Dengue virus type 2 isolate 04089/01 polyprotein (POLY) gene, partial cds
MW946278.1	Katzelnick,L., Escoto,A., Huang,A., Garcia-Carreras,B., Chowdhury,N., Berry,I., Chavez,C., Rutvisuttinunt,W., Buchy,P., Duong,V., Dussart,P., Gromowski,G., Macareo,L., Smith,D., Jarman,R., Whitehead,S., Salje,H., Cummings,D., Lessler,J., Melendrez,M., Endy,T., Kalanarooj,S., A-Nuegoonpipat,A., Chanama,S., Sangkijporn,S., Klungthong,C., Thaisomboonsuk,B., Nisalak,A., Gibbons,R., Iamsirithaworn,S.,…	2021-04-23T00:00:00Z	07718/97	Dengue virus	Flavivirus	Flaviviridae	ssRNA(+)	10175	GenBank	partial	0	Thailand	Thailand	Homo sapiens	0	1997	Dengue virus type 2 isolate 07718/97 polyprotein (POLY) gene, partial cds
MW946277.1	Katzelnick,L., Escoto,A., Huang,A., Garcia-Carreras,B., Chowdhury,N., Berry,I., Chavez,C., Rutvisuttinunt,W., Buchy,P., Duong,V., Dussart,P., Gromowski,G., Macareo,L., Smith,D., Jarman,R., Whitehead,S., Salje,H., Cummings,D., Lessler,J., Melendrez,M., Endy,T., Kalanarooj,S., A-Nuegoonpipat,A., Chanama,S., Sangkijporn,S., Klungthong,C., Thaisomboonsuk,B., Nisalak,A., Gibbons,R., Iamsirithaworn,S.,…	2021-04-23T00:00:00Z	04373/99	Dengue virus	Flavivirus	Flaviviridae	ssRNA(+)	10175	GenBank	partial	0	Thailand	Thailand	Homo sapiens	0	1999	Dengue virus type 2 isolate 04373/99 polyprotein (POLY) gene, partial cds
MW946276.1	Katzelnick,L., Escoto,A., Huang,A., Garcia-Carreras,B., Chowdhury,N., Berry,I., Chavez,C., Rutvisuttinunt,W., Buchy,P., Duong,V., Dussart,P., Gromowski,G., Macareo,L., Smith,D., Jarman,R., Whitehead,S., Salje,H., Cummings,D., Lessler,J., Melendrez,M., Endy,T., Kalanarooj,S., A-Nuegoonpipat,A., Chanama,S., Sangkijporn,S., Klungthong,C., Thaisomboonsuk,B., Nisalak,A., Gibbons,R., Iamsirithaworn,S.,…	2021-04-23T00:00:00Z	05539/99	Dengue virus	Flavivirus	Flaviviridae	ssRNA(+)	10175	GenBank	partial	0	Thailand	Thailand	Homo sapiens	0	1999	Dengue virus type 2 isolate 05539/99 polyprotein (POLY) gene, partial cds
MW946275.1	Katzelnick,L., Escoto,A., Huang,A., Garcia-Carreras,B., Chowdhury,N., Berry,I., Chavez,C., Rutvisuttinunt,W., Buchy,P., Duong,V., Dussart,P., Gromowski,G., Macareo,L., Smith,D., Jarman,R., Whitehead,S., Salje,H., Cummings,D., Lessler,J., Melendrez,M., Endy,T., Kalanarooj,S., A-Nuegoonpipat,A., Chanama,S., Sangkijporn,S., Klungthong,C., Thaisomboonsuk,B., Nisalak,A., Gibbons,R., Iamsirithaworn,S.,…	2021-04-23T00:00:00Z	01218/04	Dengue virus	Flavivirus	Flaviviridae	ssRNA(+)	10175	GenBank	partial	0	Thailand	Thailand	Homo sapiens	0	2004	Dengue virus type 2 isolate 01218/04 polyprotein (POLY) gene, partial cds
MW946274.1	Katzelnick,L., Escoto,A., Huang,A., Garcia-Carreras,B., Chowdhury,N., Berry,I., Chavez,C., Rutvisuttinunt,W., Buchy,P., Duong,V., Dussart,P., Gromowski,G., Macareo,L., Smith,D., Jarman,R., Whitehead,S., Salje,H., Cummings,D., Lessler,J., Melendrez,M., Endy,T., Kalanarooj,S., A-Nuegoonpipat,A., Chanama,S., Sangkijporn,S., Klungthong,C., Thaisomboonsuk,B., Nisalak,A., Gibbons,R., Iamsirithaworn,S.,…	2021-04-23T00:00:00Z	01429/94	Dengue virus	Flavivirus	Flaviviridae	ssRNA(+)	10175	GenBank	partial	0	Thailand	Thailand	Homo sapiens	0	1994	Dengue virus type 2 isolate 01429/94 polyprotein (POLY) gene, partial cds
MW946273.1	Katzelnick,L., Escoto,A., Huang,A., Garcia-Carreras,B., Chowdhury,N., Berry,I., Chavez,C., Rutvisuttinunt,W., Buchy,P., Duong,V., Dussart,P., Gromowski,G., Macareo,L., Smith,D., Jarman,R., Whitehead,S., Salje,H., Cummings,D., Lessler,J., Melendrez,M., Endy,T., Kalanarooj,S., A-Nuegoonpipat,A., Chanama,S., Sangkijporn,S., Klungthong,C., Thaisomboonsuk,B., Nisalak,A., Gibbons,R., Iamsirithaworn,S.,…	2021-04-23T00:00:00Z	00207/03	Dengue virus	Flavivirus	Flaviviridae	ssRNA(+)	10175	GenBank	partial	0	Thailand	Thailand	Homo sapiens	0	2003	Dengue virus type 2 isolate 00207/03 polyprotein (POLY) gene, partial cds
MW946272.1	Katzelnick,L., Escoto,A., Huang,A., Garcia-Carreras,B., Chowdhury,N., Berry,I., Chavez,C., Rutvisuttinunt,W., Buchy,P., Duong,V., Dussart,P., Gromowski,G., Macareo,L., Smith,D., Jarman,R., Whitehead,S., Salje,H., Cummings,D., Lessler,J., Melendrez,M., Endy,T., Kalanarooj,S., A-Nuegoonpipat,A., Chanama,S., Sangkijporn,S., Klungthong,C., Thaisomboonsuk,B., Nisalak,A., Gibbons,R., Iamsirithaworn,S.,…	2021-04-23T00:00:00Z	00538/07	Dengue virus	Flavivirus	Flaviviridae	ssRNA(+)	10175	GenBank	partial	0	Thailand	Thailand	Homo sapiens	0	2007	Dengue virus type 2 isolate 00538/07 polyprotein (POLY) gene, partial cds
MW946271.1	Katzelnick,L., Escoto,A., Huang,A., Garcia-Carreras,B., Chowdhury,N., Berry,I., Chavez,C., Rutvisuttinunt,W., Buchy,P., Duong,V., Dussart,P., Gromowski,G., Macareo,L., Smith,D., Jarman,R., Whitehead,S., Salje,H., Cummings,D., Lessler,J., Melendrez,M., Endy,T., Kalanarooj,S., A-Nuegoonpipat,A., Chanama,S., Sangkijporn,S., Klungthong,C., Thaisomboonsuk,B., Nisalak,A., Gibbons,R., Iamsirithaworn,S.,…	2021-04-23T00:00:00Z	01888/03	Dengue virus	Flavivirus	Flaviviridae	ssRNA(+)	10175	GenBank	partial	0	Thailand	Thailand	Homo sapiens	0	2003	Dengue virus type 2 isolate 01888/03 polyprotein (POLY) gene, partial cds
MW946270.1	Katzelnick,L., Escoto,A., Huang,A., Garcia-Carreras,B., Chowdhury,N., Berry,I., Chavez,C., Rutvisuttinunt,W., Buchy,P., Duong,V., Dussart,P., Gromowski,G., Macareo,L., Smith,D., Jarman,R., Whitehead,S., Salje,H., Cummings,D., Lessler,J., Melendrez,M., Endy,T., Kalanarooj,S., A-Nuegoonpipat,A., Chanama,S., Sangkijporn,S., Klungthong,C., Thaisomboonsuk,B., Nisalak,A., Gibbons,R., Iamsirithaworn,S.,…	2021-04-23T00:00:00Z	01212/06	Dengue virus	Flavivirus	Flaviviridae	ssRNA(+)	10175	GenBank	partial	0	Thailand	Thailand	Homo sapiens	0	2006	Dengue virus type 2 isolate 01212/06 polyprotein (POLY) gene, partial cds
MW946269.1	Katzelnick,L., Escoto,A., Huang,A., Garcia-Carreras,B., Chowdhury,N., Berry,I., Chavez,C., Rutvisuttinunt,W., Buchy,P., Duong,V., Dussart,P., Gromowski,G., Macareo,L., Smith,D., Jarman,R., Whitehead,S., Salje,H., Cummings,D., Lessler,J., Melendrez,M., Endy,T., Kalanarooj,S., A-Nuegoonpipat,A., Chanama,S., Sangkijporn,S., Klungthong,C., Thaisomboonsuk,B., Nisalak,A., Gibbons,R., Iamsirithaworn,S.,…	2021-04-23T00:00:00Z	BID-V533	Dengue virus	Flavivirus	Flaviviridae	ssRNA(+)	10176	GenBank	partial	0	Nicaragua	Nicaragua	Homo sapiens	0	2005	Dengue virus type 2 isolate BID-V533 polyprotein (POLY) gene, complete cds
MW946268.1	Katzelnick,L., Escoto,A., Huang,A., Garcia-Carreras,B., Chowdhury,N., Berry,I., Chavez,C., Rutvisuttinunt,W., Buchy,P., Duong,V., Dussart,P., Gromowski,G., Macareo,L., Smith,D., Jarman,R., Whitehead,S., Salje,H., Cummings,D., Lessler,J., Melendrez,M., Endy,T., Kalanarooj,S., A-Nuegoonpipat,A., Chanama,S., Sangkijporn,S., Klungthong,C., Thaisomboonsuk,B., Nisalak,A., Gibbons,R., Iamsirithaworn,S.,…	2021-04-23T00:00:00Z	01929/06	Dengue virus	Flavivirus	Flaviviridae	ssRNA(+)	10175	GenBank	partial	0	Thailand	Thailand	Homo sapiens	0	2006	Dengue virus type 2 isolate 01929/06 polyprotein (POLY) gene, partial cds
MW946267.1	Katzelnick,L., Escoto,A., Huang,A., Garcia-Carreras,B., Chowdhury,N., Berry,I., Chavez,C., Rutvisuttinunt,W., Buchy,P., Duong,V., Dussart,P., Gromowski,G., Macareo,L., Smith,D., Jarman,R., Whitehead,S., Salje,H., Cummings,D., Lessler,J., Melendrez,M., Endy,T., Kalanarooj,S., A-Nuegoonpipat,A., Chanama,S., Sangkijporn,S., Klungthong,C., Thaisomboonsuk,B., Nisalak,A., Gibbons,R., Iamsirithaworn,S.,…	2021-04-23T00:00:00Z	01899/00	Dengue virus	Flavivirus	Flaviviridae	ssRNA(+)	10175	GenBank	partial	0	Thailand	Thailand	Homo sapiens	0	2000	Dengue virus type 2 isolate 01899/00 polyprotein (POLY) gene, partial cds
MW946266.1	Katzelnick,L., Escoto,A., Huang,A., Garcia-Carreras,B., Chowdhury,N., Berry,I., Chavez,C., Rutvisuttinunt,W., Buchy,P., Duong,V., Dussart,P., Gromowski,G., Macareo,L., Smith,D., Jarman,R., Whitehead,S., Salje,H., Cummings,D., Lessler,J., Melendrez,M., Endy,T., Kalanarooj,S., A-Nuegoonpipat,A., Chanama,S., Sangkijporn,S., Klungthong,C., Thaisomboonsuk,B., Nisalak,A., Gibbons,R., Iamsirithaworn,S.,…	2021-04-23T00:00:00Z	00795/12	Dengue virus	Flavivirus	Flaviviridae	ssRNA(+)	10175	GenBank	partial	0	Thailand	Thailand	Homo sapiens	0	2012	Dengue virus type 2 isolate 00795/12 polyprotein (POLY) gene, partial cds
MW946265.1	Katzelnick,L., Escoto,A., Huang,A., Garcia-Carreras,B., Chowdhury,N., Berry,I., Chavez,C., Rutvisuttinunt,W., Buchy,P., Duong,V., Dussart,P., Gromowski,G., Macareo,L., Smith,D., Jarman,R., Whitehead,S., Salje,H., Cummings,D., Lessler,J., Melendrez,M., Endy,T., Kalanarooj,S., A-Nuegoonpipat,A., Chanama,S., Sangkijporn,S., Klungthong,C., Thaisomboonsuk,B., Nisalak,A., Gibbons,R., Iamsirithaworn,S.,…	2021-04-23T00:00:00Z	00825/11	Dengue virus	Flavivirus	Flaviviridae	ssRNA(+)	10175	GenBank	partial	0	Thailand	Thailand	Homo sapiens	0	2011	Dengue virus type 2 isolate 00825/11 polyprotein (POLY) gene, partial cds
MW946264.1	Katzelnick,L., Escoto,A., Huang,A., Garcia-Carreras,B., Chowdhury,N., Berry,I., Chavez,C., Rutvisuttinunt,W., Buchy,P., Duong,V., Dussart,P., Gromowski,G., Macareo,L., Smith,D., Jarman,R., Whitehead,S., Salje,H., Cummings,D., Lessler,J., Melendrez,M., Endy,T., Kalanarooj,S., A-Nuegoonpipat,A., Chanama,S., Sangkijporn,S., Klungthong,C., Thaisomboonsuk,B., Nisalak,A., Gibbons,R., Iamsirithaworn,S.,…	2021-04-23T00:00:00Z	00921/94	Dengue virus	Flavivirus	Flaviviridae	ssRNA(+)	10175	GenBank	partial	0	Thailand	Thailand	Homo sapiens	0	1994	Dengue virus type 2 isolate 00921/94 polyprotein (POLY) gene, partial cds
MW946263.1	Katzelnick,L., Escoto,A., Huang,A., Garcia-Carreras,B., Chowdhury,N., Berry,I., Chavez,C., Rutvisuttinunt,W., Buchy,P., Duong,V., Dussart,P., Gromowski,G., Macareo,L., Smith,D., Jarman,R., Whitehead,S., Salje,H., Cummings,D., Lessler,J., Melendrez,M., Endy,T., Kalanarooj,S., A-Nuegoonpipat,A., Chanama,S., Sangkijporn,S., Klungthong,C., Thaisomboonsuk,B., Nisalak,A., Gibbons,R., Iamsirithaworn,S.,…	2021-04-23T00:00:00Z	00662/94	Dengue virus	Flavivirus	Flaviviridae	ssRNA(+)	10175	GenBank	partial	0	Thailand	Thailand	Homo sapiens	0	1994	Dengue virus type 2 isolate 00662/94 polyprotein (POLY) gene, partial cds
MW946262.1	Katzelnick,L., Escoto,A., Huang,A., Garcia-Carreras,B., Chowdhury,N., Berry,I., Chavez,C., Rutvisuttinunt,W., Buchy,P., Duong,V., Dussart,P., Gromowski,G., Macareo,L., Smith,D., Jarman,R., Whitehead,S., Salje,H., Cummings,D., Lessler,J., Melendrez,M., Endy,T., Kalanarooj,S., A-Nuegoonpipat,A., Chanama,S., Sangkijporn,S., Klungthong,C., Thaisomboonsuk,B., Nisalak,A., Gibbons,R., Iamsirithaworn,S.,…	2021-04-23T00:00:00Z	02321/02	Dengue virus	Flavivirus	Flaviviridae	ssRNA(+)	10175	GenBank	partial	0	Thailand	Thailand	Homo sapiens	0	2002	Dengue virus type 2 isolate 02321/02 polyprotein (POLY) gene, partial cds
MW946261.1	Katzelnick,L., Escoto,A., Huang,A., Garcia-Carreras,B., Chowdhury,N., Berry,I., Chavez,C., Rutvisuttinunt,W., Buchy,P., Duong,V., Dussart,P., Gromowski,G., Macareo,L., Smith,D., Jarman,R., Whitehead,S., Salje,H., Cummings,D., Lessler,J., Melendrez,M., Endy,T., Kalanarooj,S., A-Nuegoonpipat,A., Chanama,S., Sangkijporn,S., Klungthong,C., Thaisomboonsuk,B., Nisalak,A., Gibbons,R., Iamsirithaworn,S.,…	2021-04-23T00:00:00Z	04056/99	Dengue virus	Flavivirus	Flaviviridae	ssRNA(+)	10175	GenBank	partial	0	Thailand	Thailand	Homo sapiens	0	1999	Dengue virus type 2 isolate 04056/99 polyprotein (POLY) gene, partial cds
MW946260.1	Katzelnick,L., Escoto,A., Huang,A., Garcia-Carreras,B., Chowdhury,N., Berry,I., Chavez,C., Rutvisuttinunt,W., Buchy,P., Duong,V., Dussart,P., Gromowski,G., Macareo,L., Smith,D., Jarman,R., Whitehead,S., Salje,H., Cummings,D., Lessler,J., Melendrez,M., Endy,T., Kalanarooj,S., A-Nuegoonpipat,A., Chanama,S., Sangkijporn,S., Klungthong,C., Thaisomboonsuk,B., Nisalak,A., Gibbons,R., Iamsirithaworn,S.,…	2021-04-23T00:00:00Z	01488/94	Dengue virus	Flavivirus	Flaviviridae	ssRNA(+)	10175	GenBank	partial	0	Thailand	Thailand	Homo sapiens	0	1994	Dengue virus type 2 isolate 01488/94 polyprotein (POLY) gene, partial cds
MW946259.1	Katzelnick,L., Escoto,A., Huang,A., Garcia-Carreras,B., Chowdhury,N., Berry,I., Chavez,C., Rutvisuttinunt,W., Buchy,P., Duong,V., Dussart,P., Gromowski,G., Macareo,L., Smith,D., Jarman,R., Whitehead,S., Salje,H., Cummings,D., Lessler,J., Melendrez,M., Endy,T., Kalanarooj,S., A-Nuegoonpipat,A., Chanama,S., Sangkijporn,S., Klungthong,C., Thaisomboonsuk,B., Nisalak,A., Gibbons,R., Iamsirithaworn,S.,…	2021-04-23T00:00:00Z	01495/05	Dengue virus	Flavivirus	Flaviviridae	ssRNA(+)	10175	GenBank	partial	0	Thailand	Thailand	Homo sapiens	0	2005	Dengue virus type 2 isolate 01495/05 polyprotein (POLY) gene, partial cds
MW946258.1	Katzelnick,L., Escoto,A., Huang,A., Garcia-Carreras,B., Chowdhury,N., Berry,I., Chavez,C., Rutvisuttinunt,W., Buchy,P., Duong,V., Dussart,P., Gromowski,G., Macareo,L., Smith,D., Jarman,R., Whitehead,S., Salje,H., Cummings,D., Lessler,J., Melendrez,M., Endy,T., Kalanarooj,S., A-Nuegoonpipat,A., Chanama,S., Sangkijporn,S., Klungthong,C., Thaisomboonsuk,B., Nisalak,A., Gibbons,R., Iamsirithaworn,S.,…	2021-04-23T00:00:00Z	02136/96	Dengue virus	Flavivirus	Flaviviridae	ssRNA(+)	10175	GenBank	partial	0	Thailand	Thailand	Homo sapiens	0	1996	Dengue virus type 2 isolate 02136/96 polyprotein (POLY) gene, partial cds
MW946257.1	Katzelnick,L., Escoto,A., Huang,A., Garcia-Carreras,B., Chowdhury,N., Berry,I., Chavez,C., Rutvisuttinunt,W., Buchy,P., Duong,V., Dussart,P., Gromowski,G., Macareo,L., Smith,D., Jarman,R., Whitehead,S., Salje,H., Cummings,D., Lessler,J., Melendrez,M., Endy,T., Kalanarooj,S., A-Nuegoonpipat,A., Chanama,S., Sangkijporn,S., Klungthong,C., Thaisomboonsuk,B., Nisalak,A., Gibbons,R., Iamsirithaworn,S.,…	2021-04-23T00:00:00Z	03066/97	Dengue virus	Flavivirus	Flaviviridae	ssRNA(+)	10175	GenBank	partial	0	Thailand	Thailand	Homo sapiens	0	1997	Dengue virus type 2 isolate 03066/97 polyprotein (POLY) gene, partial cds
MW946256.1	Katzelnick,L., Escoto,A., Huang,A., Garcia-Carreras,B., Chowdhury,N., Berry,I., Chavez,C., Rutvisuttinunt,W., Buchy,P., Duong,V., Dussart,P., Gromowski,G., Macareo,L., Smith,D., Jarman,R., Whitehead,S., Salje,H., Cummings,D., Lessler,J., Melendrez,M., Endy,T., Kalanarooj,S., A-Nuegoonpipat,A., Chanama,S., Sangkijporn,S., Klungthong,C., Thaisomboonsuk,B., Nisalak,A., Gibbons,R., Iamsirithaworn,S.,…	2021-04-23T00:00:00Z	00033/95	Dengue virus	Flavivirus	Flaviviridae	ssRNA(+)	10175	GenBank	partial	0	Thailand	Thailand	Homo sapiens	0	1995	Dengue virus type 2 isolate 00033/95 polyprotein (POLY) gene, partial cds
MW946255.1	Katzelnick,L., Escoto,A., Huang,A., Garcia-Carreras,B., Chowdhury,N., Berry,I., Chavez,C., Rutvisuttinunt,W., Buchy,P., Duong,V., Dussart,P., Gromowski,G., Macareo,L., Smith,D., Jarman,R., Whitehead,S., Salje,H., Cummings,D., Lessler,J., Melendrez,M., Endy,T., Kalanarooj,S., A-Nuegoonpipat,A., Chanama,S., Sangkijporn,S., Klungthong,C., Thaisomboonsuk,B., Nisalak,A., Gibbons,R., Iamsirithaworn,S.,…	2021-04-23T00:00:00Z	00953/05	Dengue virus	Flavivirus	Flaviviridae	ssRNA(+)	10175	GenBank	partial	0	Thailand	Thailand	Homo sapiens	0	2005	Dengue virus type 2 isolate 00953/05 polyprotein (POLY) gene, partial cds
MW945435.1	Katzelnick,L., Escoto,A., Huang,A., Garcia-Carreras,B., Chowdhury,N., Berry,I., Chavez,C., Rutvisuttinunt,W., Buchy,P., Duong,V., Dussart,P., Gromowski,G., Macareo,L., Smith,D., Jarman,R., Whitehead,S., Salje,H., Cummings,D., Lessler,J., Melendrez,M., Endy,T., Kalanarooj,S., A-Nuegoonpipat,A., Chanama,S., Sangkijporn,S., Klungthong,C., Thaisomboonsuk,B., Nisalak,A., Gibbons,R., Iamsirithaworn,S.,…	2021-04-23T00:00:00Z	DENV2/VIETNAM/2006/32-135	Dengue virus	Flavivirus	Flaviviridae	ssRNA(+)	10176	GenBank	partial	0	Viet Nam	Viet Nam	Homo sapiens	0	2006	Dengue virus type 2 isolate DENV2/VIETNAM/2006/32-135 polyprotein (POLY) gene, complete cds
MW945434.1	Katzelnick,L., Escoto,A., Huang,A., Garcia-Carreras,B., Chowdhury,N., Berry,I., Chavez,C., Rutvisuttinunt,W., Buchy,P., Duong,V., Dussart,P., Gromowski,G., Macareo,L., Smith,D., Jarman,R., Whitehead,S., Salje,H., Cummings,D., Lessler,J., Melendrez,M., Endy,T., Kalanarooj,S., A-Nuegoonpipat,A., Chanama,S., Sangkijporn,S., Klungthong,C., Thaisomboonsuk,B., Nisalak,A., Gibbons,R., Iamsirithaworn,S.,…	2021-04-23T00:00:00Z	DENV2/VIETNAM/2003/AC21	Dengue virus	Flavivirus	Flaviviridae	ssRNA(+)	10176	GenBank	partial	0	Viet Nam	Viet Nam	Homo sapiens	0	2003	Dengue virus type 2 isolate DENV2/VIETNAM/2003/AC21 polyprotein (POLY) gene, complete cds
MW945433.1	Katzelnick,L., Escoto,A., Huang,A., Garcia-Carreras,B., Chowdhury,N., Berry,I., Chavez,C., Rutvisuttinunt,W., Buchy,P., Duong,V., Dussart,P., Gromowski,G., Macareo,L., Smith,D., Jarman,R., Whitehead,S., Salje,H., Cummings,D., Lessler,J., Melendrez,M., Endy,T., Kalanarooj,S., A-Nuegoonpipat,A., Chanama,S., Sangkijporn,S., Klungthong,C., Thaisomboonsuk,B., Nisalak,A., Gibbons,R., Iamsirithaworn,S.,…	2021-04-23T00:00:00Z	DENV2/PAPUANEWGUINEA/1944/NEWGUINEAC	Dengue virus	Flavivirus	Flaviviridae	ssRNA(+)	10175	GenBank	partial	0	Papua New Guinea	Papua New Guinea	Homo sapiens	0	1944	Dengue virus type 2 isolate DENV2/PAPUANEWGUINEA/1944/NEWGUINEAC polyprotein (POLY) gene, partial cds
MW881533.1	Jiang,L., Cao,Y., Su,W.	2021-04-13T00:00:00Z	21XN02436 D2	Dengue virus	Flavivirus	Flaviviridae	ssRNA(+)	10602	GenBank	partial	0	China: Guangzhou	China	Homo sapiens	blood	44229	Dengue virus type 2 isolate 21XN02436 D2 polyprotein (POLY) gene, complete cds
MW788987.1	Soe,A.M., Ngwe Tun,M.M., Nabeshima,T., Myat,T.W., Htun,M.M., Lin,H., Hom,N.S., Inoue,S., Nwe,K.M., Aye,L.P.P., Fukuta,M., Thant,K.Z., Hasebe,F., Morita,K., Shresta,S., Thu,H.M., Moi,M.L.	2021-07-14T00:00:00Z	YCH_D2_4_19consensus	Dengue virus	Flavivirus	Flaviviridae	ssRNA(+)	10596	GenBank	partial	DENV-2	Myanmar: Yangon	Myanmar	Homo sapiens	blood	2019-06	Dengue virus type 2 isolate YCH_D2_4_19consensus polyprotein (POLY) gene, complete cds
MW788986.1	Soe,A.M., Ngwe Tun,M.M., Nabeshima,T., Myat,T.W., Htun,M.M., Lin,H., Hom,N.S., Inoue,S., Nwe,K.M., Aye,L.P.P., Fukuta,M., Thant,K.Z., Hasebe,F., Morita,K., Shresta,S., Thu,H.M., Moi,M.L.	2021-07-14T00:00:00Z	YCH_D2_3_19consensus	Dengue virus	Flavivirus	Flaviviridae	ssRNA(+)	10516	GenBank	partial	DENV-2	Myanmar: Yangon	Myanmar	Homo sapiens	blood	2019-01	Dengue virus type 2 isolate YCH_D2_3_19consensus polyprotein (POLY) gene, complete cds
MW788985.1	Soe,A.M., Ngwe Tun,M.M., Nabeshima,T., Myat,T.W., Htun,M.M., Lin,H., Hom,N.S., Inoue,S., Nwe,K.M., Aye,L.P.P., Fukuta,M., Thant,K.Z., Hasebe,F., Morita,K., Shresta,S., Thu,H.M., Moi,M.L.	2021-07-14T00:00:00Z	YCH_D2_7_19consensus	Dengue virus	Flavivirus	Flaviviridae	ssRNA(+)	10594	GenBank	partial	DENV-2	Myanmar: Yangon	Myanmar	Homo sapiens	blood	2019-09	Dengue virus type 2 isolate YCH_D2_7_19consensus polyprotein (POLY) gene, complete cds
MW788984.1	Soe,A.M., Ngwe Tun,M.M., Nabeshima,T., Myat,T.W., Htun,M.M., Lin,H., Hom,N.S., Inoue,S., Nwe,K.M., Aye,L.P.P., Fukuta,M., Thant,K.Z., Hasebe,F., Morita,K., Shresta,S., Thu,H.M., Moi,M.L.	2021-07-14T00:00:00Z	YCH_D2_5_19consensus	Dengue virus	Flavivirus	Flaviviridae	ssRNA(+)	10594	GenBank	partial	DENV-2	Myanmar: Yangon	Myanmar	Homo sapiens	blood	2019-06	Dengue virus type 2 isolate YCH_D2_5_19consensus polyprotein (POLY) gene, complete cds
MW788983.1	Soe,A.M., Ngwe Tun,M.M., Nabeshima,T., Myat,T.W., Htun,M.M., Lin,H., Hom,N.S., Inoue,S., Nwe,K.M., Aye,L.P.P., Fukuta,M., Thant,K.Z., Hasebe,F., Morita,K., Shresta,S., Thu,H.M., Moi,M.L.	2021-07-14T00:00:00Z	YCH_D2_6_19consensus	Dengue virus	Flavivirus	Flaviviridae	ssRNA(+)	10594	GenBank	partial	DENV-2	Myanmar: Yangon	Myanmar	Homo sapiens	blood	2019-09	Dengue virus type 2 isolate YCH_D2_6_19consensus polyprotein (POLY) gene, complete cds
MW788982.1	Soe,A.M., Ngwe Tun,M.M., Nabeshima,T., Myat,T.W., Htun,M.M., Lin,H., Hom,N.S., Inoue,S., Nwe,K.M., Aye,L.P.P., Fukuta,M., Thant,K.Z., Hasebe,F., Morita,K., Shresta,S., Thu,H.M., Moi,M.L.	2021-07-14T00:00:00Z	YGH_D2_2_18consensus	Dengue virus	Flavivirus	Flaviviridae	ssRNA(+)	10548	GenBank	partial	DENV-2	Myanmar: Yangon	Myanmar	Homo sapiens	blood	2018-08	Dengue virus type 2 isolate YGH_D2_2_18consensus polyprotein (POLY) gene, complete cds
MW788981.1	Soe,A.M., Ngwe Tun,M.M., Nabeshima,T., Myat,T.W., Htun,M.M., Lin,H., Hom,N.S., Inoue,S., Nwe,K.M., Aye,L.P.P., Fukuta,M., Thant,K.Z., Hasebe,F., Morita,K., Shresta,S., Thu,H.M., Moi,M.L.	2021-07-14T00:00:00Z	YCH_D2_1_18consensus	Dengue virus	Flavivirus	Flaviviridae	ssRNA(+)	10570	GenBank	partial	DENV-2	Myanmar: Yangon	Myanmar	Homo sapiens	blood	2018-09	Dengue virus type 2 isolate YCH_D2_1_18consensus polyprotein (POLY) gene, complete cds
MW741553.1	Kaptein,S.J.F., Goethals,O., Kiemel,D., Marchand,A., Kesteleyn,B., Bonfanti,J.F., Bardiot,D., Stoops,B., Jonckers,T.H.M., Dallmeier,K., Geluykens,P., Thys,K., Crabbe,M., Chatel-Chaix,L., Munster,M., Querat,G., Touret,F., de Lamballerie,X., Raboisson,P., Simmen,K., Chaltin,P., Bartenschlager,R., Van Loock,M., Neyts,J., Kaptein,S.	2021-03-20T00:00:00Z	DENV-2 Rega Lab strain	Dengue virus	Flavivirus	Flaviviridae	ssRNA(+)	10702	GenBank	partial	DENV-2	Papua New Guinea	Papua New Guinea	Homo sapiens	0	2000	Dengue virus type 2 isolate DENV-2 Rega Lab strain polyprotein (POLY) gene, complete cds
MW730839.1	Ngwe Tun,M.M., Pandey,K., Nabeshima,T., Kyaw,A.K., Adhikari,M., Raini,S.K., Inoue,S., Dumre,S.P., Pandey,B.D., Morita,K.	2021-09-10T00:00:00Z	SeqB102_DENV2_CONSENSUS	Dengue virus	Flavivirus	Flaviviridae	ssRNA(+)	10584	GenBank	partial	Cosmopolitan	Nepal	Nepal	Homo sapiens	blood	2017-07	Dengue virus type 2 isolate SeqB102_DENV2_CONSENSUS polyprotein (POLY) gene, complete cds
MW730838.1	Ngwe Tun,M.M., Pandey,K., Nabeshima,T., Kyaw,A.K., Adhikari,M., Raini,S.K., Inoue,S., Dumre,S.P., Pandey,B.D., Morita,K.	2021-09-10T00:00:00Z	SeqD17_DENV2_CONSENSUS	Dengue virus	Flavivirus	Flaviviridae	ssRNA(+)	10584	GenBank	partial	Cosmopolitan	Nepal	Nepal	Homo sapiens	blood	2017-07	Dengue virus type 2 isolate SeqD17_DENV2_CONSENSUS polyprotein (POLY) gene, complete cds
MW730837.1	Ngwe Tun,M.M., Pandey,K., Nabeshima,T., Kyaw,A.K., Adhikari,M., Raini,S.K., Inoue,S., Dumre,S.P., Pandey,B.D., Morita,K.	2021-09-10T00:00:00Z	SeqD13_DENV2_CONSENSUS	Dengue virus	Flavivirus	Flaviviridae	ssRNA(+)	10584	GenBank	partial	Cosmopolitan	Nepal	Nepal	Homo sapiens	blood	2017-07	Dengue virus type 2 isolate SeqD13_DENV2_CONSENSUS polyprotein (POLY) gene, complete cds
MW730836.1	Ngwe Tun,M.M., Pandey,K., Nabeshima,T., Kyaw,A.K., Adhikari,M., Raini,S.K., Inoue,S., Dumre,S.P., Pandey,B.D., Morita,K.	2021-09-10T00:00:00Z	SeqD3_DENV2_CONSENSUS	Dengue virus	Flavivirus	Flaviviridae	ssRNA(+)	10580	GenBank	partial	Cosmopolitan	Nepal	Nepal	Homo sapiens	blood	2017-07	Dengue virus type 2 isolate SeqD3_DENV2_CONSENSUS polyprotein (POLY) gene, complete cds
MW730835.1	Ngwe Tun,M.M., Pandey,K., Nabeshima,T., Kyaw,A.K., Adhikari,M., Raini,S.K., Inoue,S., Dumre,S.P., Pandey,B.D., Morita,K.	2021-09-10T00:00:00Z	SeqD24_DENV2_CONSENSUS	Dengue virus	Flavivirus	Flaviviridae	ssRNA(+)	10584	GenBank	partial	Cosmopolitan	Nepal	Nepal	Homo sapiens	blood	2017-07	Dengue virus type 2 isolate SeqD24_DENV2_CONSENSUS polyprotein (POLY) gene, complete cds
MW730834.1	Ngwe Tun,M.M., Pandey,K., Nabeshima,T., Kyaw,A.K., Adhikari,M., Raini,S.K., Inoue,S., Dumre,S.P., Pandey,B.D., Morita,K.	2021-09-10T00:00:00Z	SeqD30_DENV2_CONSENSUS	Dengue virus	Flavivirus	Flaviviridae	ssRNA(+)	10580	GenBank	partial	Cosmopolitan	Nepal	Nepal	Homo sapiens	blood	2017-07	Dengue virus type 2 isolate SeqD30_DENV2_CONSENSUS polyprotein (POLY) gene, complete cds
MW730833.1	Ngwe Tun,M.M., Pandey,K., Nabeshima,T., Kyaw,A.K., Adhikari,M., Raini,S.K., Inoue,S., Dumre,S.P., Pandey,B.D., Morita,K.	2021-09-10T00:00:00Z	SeqL3_DENV2_CONSENSUS	Dengue virus	Flavivirus	Flaviviridae	ssRNA(+)	10583	GenBank	partial	Cosmopolitan	Nepal	Nepal	Homo sapiens	blood	2017-07	Dengue virus type 2 isolate SeqL3_DENV2_CONSENSUS polyprotein (POLY) gene, complete cds
MW730832.1	Ngwe Tun,M.M., Pandey,K., Nabeshima,T., Kyaw,A.K., Adhikari,M., Raini,S.K., Inoue,S., Dumre,S.P., Pandey,B.D., Morita,K.	2021-09-10T00:00:00Z	SeqB86_DENV2_CONSENSUS	Dengue virus	Flavivirus	Flaviviridae	ssRNA(+)	10583	GenBank	partial	Cosmopolitan	Nepal	Nepal	Homo sapiens	blood	2017-07	Dengue virus type 2 isolate SeqB86_DENV2_CONSENSUS polyprotein (POLY) gene, complete cds
MW730831.1	Ngwe Tun,M.M., Pandey,K., Nabeshima,T., Kyaw,A.K., Adhikari,M., Raini,S.K., Inoue,S., Dumre,S.P., Pandey,B.D., Morita,K.	2021-09-10T00:00:00Z	SeqL13_DENV2_CONSENSUS	Dengue virus	Flavivirus	Flaviviridae	ssRNA(+)	10584	GenBank	partial	Cosmopolitan	Nepal	Nepal	Homo sapiens	blood	2017-07	Dengue virus type 2 isolate SeqL13_DENV2_CONSENSUS polyprotein (POLY) gene, complete cds
MW730830.1	Ngwe Tun,M.M., Pandey,K., Nabeshima,T., Kyaw,A.K., Adhikari,M., Raini,S.K., Inoue,S., Dumre,S.P., Pandey,B.D., Morita,K.	2021-09-10T00:00:00Z	SeqL10_DENV2_CONSENSUS	Dengue virus	Flavivirus	Flaviviridae	ssRNA(+)	10584	GenBank	partial	Cosmopolitan	Nepal	Nepal	Homo sapiens	blood	2017-07	Dengue virus type 2 isolate SeqL10_DENV2_CONSENSUS polyprotein (POLY) gene, complete cds
MW730829.1	Ngwe Tun,M.M., Pandey,K., Nabeshima,T., Kyaw,A.K., Adhikari,M., Raini,S.K., Inoue,S., Dumre,S.P., Pandey,B.D., Morita,K.	2021-09-10T00:00:00Z	SeqL21_DENV2_CONSENSUS	Dengue virus	Flavivirus	Flaviviridae	ssRNA(+)	10584	GenBank	partial	Cosmopolitan	Nepal	Nepal	Homo sapiens	blood	2017-07	Dengue virus type 2 isolate SeqL21_DENV2_CONSENSUS polyprotein (POLY) gene, complete cds
MW730828.1	Ngwe Tun,M.M., Pandey,K., Nabeshima,T., Kyaw,A.K., Adhikari,M., Raini,S.K., Inoue,S., Dumre,S.P., Pandey,B.D., Morita,K.	2021-09-10T00:00:00Z	SeqL15_DENV2_CONSENSUS	Dengue virus	Flavivirus	Flaviviridae	ssRNA(+)	10584	GenBank	partial	Cosmopolitan	Nepal	Nepal	Homo sapiens	blood	2017-07	Dengue virus type 2 isolate SeqL15_DENV2_CONSENSUS polyprotein (POLY) gene, complete cds
MW730827.1	Ngwe Tun,M.M., Pandey,K., Nabeshima,T., Kyaw,A.K., Adhikari,M., Raini,S.K., Inoue,S., Dumre,S.P., Pandey,B.D., Morita,K.	2021-09-10T00:00:00Z	SeqB160_DENV2_CONSENSUS	Dengue virus	Flavivirus	Flaviviridae	ssRNA(+)	10584	GenBank	partial	Cosmopolitan	Nepal	Nepal	Homo sapiens	blood	2017-07	Dengue virus type 2 isolate SeqB160_DENV2_CONSENSUS polyprotein (POLY) gene, complete cds
MW730826.1	Ngwe Tun,M.M., Pandey,K., Nabeshima,T., Kyaw,A.K., Adhikari,M., Raini,S.K., Inoue,S., Dumre,S.P., Pandey,B.D., Morita,K.	2021-09-10T00:00:00Z	SeqB62_DENV2_CONSENSUS	Dengue virus	Flavivirus	Flaviviridae	ssRNA(+)	10584	GenBank	partial	Cosmopolitan	Nepal	Nepal	Homo sapiens	blood	2017-07	Dengue virus type 2 isolate SeqB62_DENV2_CONSENSUS polyprotein (POLY) gene, complete cds
MW730825.1	Ngwe Tun,M.M., Pandey,K., Nabeshima,T., Kyaw,A.K., Adhikari,M., Raini,S.K., Inoue,S., Dumre,S.P., Pandey,B.D., Morita,K.	2021-09-10T00:00:00Z	SeqB107_DENV2_CONSENSUS	Dengue virus	Flavivirus	Flaviviridae	ssRNA(+)	10584	GenBank	partial	Cosmopolitan	Nepal	Nepal	Homo sapiens	blood	2017-07	Dengue virus type 2 isolate SeqB107_DENV2_CONSENSUS polyprotein (POLY) gene, complete cds
MW730824.1	Ngwe Tun,M.M., Pandey,K., Nabeshima,T., Kyaw,A.K., Adhikari,M., Raini,S.K., Inoue,S., Dumre,S.P., Pandey,B.D., Morita,K.	2021-09-10T00:00:00Z	SeqB121_DENV2_CONSENSUS	Dengue virus	Flavivirus	Flaviviridae	ssRNA(+)	10584	GenBank	partial	Cosmopolitan	Nepal	Nepal	Homo sapiens	blood	2017-07	Dengue virus type 2 isolate SeqB121_DENV2_CONSENSUS polyprotein (POLY) gene, complete cds
MW730823.1	Ngwe Tun,M.M., Pandey,K., Nabeshima,T., Kyaw,A.K., Adhikari,M., Raini,S.K., Inoue,S., Dumre,S.P., Pandey,B.D., Morita,K.	2021-09-10T00:00:00Z	SeqB80_DENV2_CONSENSUS	Dengue virus	Flavivirus	Flaviviridae	ssRNA(+)	10584	GenBank	partial	Cosmopolitan	Nepal	Nepal	Homo sapiens	blood	2017-07	Dengue virus type 2 isolate SeqB80_DENV2_CONSENSUS polyprotein (POLY) gene, complete cds
MW730822.1	Ngwe Tun,M.M., Pandey,K., Nabeshima,T., Kyaw,A.K., Adhikari,M., Raini,S.K., Inoue,S., Dumre,S.P., Pandey,B.D., Morita,K.	2021-09-10T00:00:00Z	SeqB157_DENV2_CONSENSUS	Dengue virus	Flavivirus	Flaviviridae	ssRNA(+)	10584	GenBank	partial	Cosmopolitan	Nepal	Nepal	Homo sapiens	blood	2017-07	Dengue virus type 2 isolate SeqB157_DENV2_CONSENSUS polyprotein (POLY) gene, complete cds
MW730821.1	Ngwe Tun,M.M., Pandey,K., Nabeshima,T., Kyaw,A.K., Adhikari,M., Raini,S.K., Inoue,S., Dumre,S.P., Pandey,B.D., Morita,K.	2021-09-10T00:00:00Z	SeqB159_DENV2_CONSENSUS	Dengue virus	Flavivirus	Flaviviridae	ssRNA(+)	10584	GenBank	partial	Cosmopolitan	Nepal	Nepal	Homo sapiens	blood	2017-07	Dengue virus type 2 isolate SeqB159_DENV2_CONSENSUS polyprotein (POLY) gene, complete cds
MW730820.1	Ngwe Tun,M.M., Pandey,K., Nabeshima,T., Kyaw,A.K., Adhikari,M., Raini,S.K., Inoue,S., Dumre,S.P., Pandey,B.D., Morita,K.	2021-09-10T00:00:00Z	SeqB97_DENV2_CONSENSUS	Dengue virus	Flavivirus	Flaviviridae	ssRNA(+)	10584	GenBank	partial	Cosmopolitan	Nepal	Nepal	Homo sapiens	blood	2017-07	Dengue virus type 2 isolate SeqB97_DENV2_CONSENSUS polyprotein (POLY) gene, complete cds
MW730819.1	Ngwe Tun,M.M., Pandey,K., Nabeshima,T., Kyaw,A.K., Adhikari,M., Raini,S.K., Inoue,S., Dumre,S.P., Pandey,B.D., Morita,K.	2021-09-10T00:00:00Z	SeqB81_DENV2_CONSENSUS	Dengue virus	Flavivirus	Flaviviridae	ssRNA(+)	10584	GenBank	partial	Cosmopolitan	Nepal	Nepal	Homo sapiens	blood	2017-07	Dengue virus type 2 isolate SeqB81_DENV2_CONSENSUS polyprotein (POLY) gene, complete cds
MW730818.1	Ngwe Tun,M.M., Pandey,K., Nabeshima,T., Kyaw,A.K., Adhikari,M., Raini,S.K., Inoue,S., Dumre,S.P., Pandey,B.D., Morita,K.	2021-09-10T00:00:00Z	SeqB158_DENV2_CONSENSUS	Dengue virus	Flavivirus	Flaviviridae	ssRNA(+)	10584	GenBank	partial	Cosmopolitan	Nepal	Nepal	Homo sapiens	blood	2017-07	Dengue virus type 2 isolate SeqB158_DENV2_CONSENSUS polyprotein (POLY) gene, complete cds
MW730817.1	Ngwe Tun,M.M., Pandey,K., Nabeshima,T., Kyaw,A.K., Adhikari,M., Raini,S.K., Inoue,S., Dumre,S.P., Pandey,B.D., Morita,K.	2021-09-10T00:00:00Z	SeqB151_DENV2_CONSENSUS	Dengue virus	Flavivirus	Flaviviridae	ssRNA(+)	10580	GenBank	partial	Cosmopolitan	Nepal	Nepal	Homo sapiens	blood	2017-07	Dengue virus type 2 isolate SeqB151_DENV2_CONSENSUS polyprotein (POLY) gene, complete cds
MW730816.1	Ngwe Tun,M.M., Pandey,K., Nabeshima,T., Kyaw,A.K., Adhikari,M., Raini,S.K., Inoue,S., Dumre,S.P., Pandey,B.D., Morita,K.	2021-09-10T00:00:00Z	SeqB63_DENV2_CONSENSUS	Dengue virus	Flavivirus	Flaviviridae	ssRNA(+)	10580	GenBank	partial	Cosmopolitan	Nepal	Nepal	Homo sapiens	blood	2017-07	Dengue virus type 2 isolate SeqB63_DENV2_CONSENSUS polyprotein (POLY) gene, complete cds
MW730815.1	Ngwe Tun,M.M., Pandey,K., Nabeshima,T., Kyaw,A.K., Adhikari,M., Raini,S.K., Inoue,S., Dumre,S.P., Pandey,B.D., Morita,K.	2021-09-10T00:00:00Z	B156_DENV2_CONSENSUS	Dengue virus	Flavivirus	Flaviviridae	ssRNA(+)	10584	GenBank	partial	Cosmopolitan	Nepal	Nepal	Homo sapiens	blood	2017-07	Dengue virus type 2 isolate B156_DENV2_CONSENSUS polyprotein (POLY) gene, complete cds
MW730814.1	Ngwe Tun,M.M., Pandey,K., Nabeshima,T., Kyaw,A.K., Adhikari,M., Raini,S.K., Inoue,S., Dumre,S.P., Pandey,B.D., Morita,K.	2021-09-10T00:00:00Z	SeqB64_DENV2_CONSENSUS	Dengue virus	Flavivirus	Flaviviridae	ssRNA(+)	10581	GenBank	partial	Cosmopolitan	Nepal	Nepal	Homo sapiens	blood	2017-07	Dengue virus type 2 isolate SeqB64_DENV2_CONSENSUS polyprotein (POLY) gene, complete cds
MW721475.1	Zhao,L., Zhang,L., Hong,W., Qiu,S., Wang,J., Zhang,F.	2022-04-30T00:00:00Z	GZ8H/2019132/2010/II	Dengue virus	Flavivirus	Flaviviridae	ssRNA(+)	10703	GenBank	partial	2	China	China	Homo sapiens	blood	2010-10	Dengue virus 2 isolate GZ8H/2019132/2010/II polyprotein (POLY) gene, complete cds
MW721474.1	Zhao,L., Zhang,L., Hong,W., Qiu,S., Wang,J., Zhang,F.	2022-04-30T00:00:00Z	GZ8H/2019127/2010/II	Dengue virus	Flavivirus	Flaviviridae	ssRNA(+)	10714	GenBank	partial	2	China	China	Homo sapiens	blood	2010-10	Dengue virus 2 isolate GZ8H/2019127/2010/II polyprotein (POLY) gene, complete cds
MW721473.1	Zhao,L., Zhang,L., Hong,W., Qiu,S., Wang,J., Zhang,F.	2022-04-30T00:00:00Z	GZ8H/2019121/2014/II	Dengue virus	Flavivirus	Flaviviridae	ssRNA(+)	10713	GenBank	partial	2	China	China	Homo sapiens	blood	2014-10	Dengue virus 2 isolate GZ8H/2019121/2014/II polyprotein (POLY) gene, complete cds
MW721472.1	Zhao,L., Zhang,L., Hong,W., Qiu,S., Wang,J., Zhang,F.	2022-04-30T00:00:00Z	GZ8H/2019116/2014/II	Dengue virus	Flavivirus	Flaviviridae	ssRNA(+)	10722	GenBank	complete	2	China	China	Homo sapiens	blood	2014-10	Dengue virus 2 isolate GZ8H/2019116/2014/II, complete genome
MW721471.1	Zhao,L., Zhang,L., Hong,W., Qiu,S., Wang,J., Zhang,F.	2022-04-30T00:00:00Z	GZ8H/2019113/2014/II	Dengue virus	Flavivirus	Flaviviridae	ssRNA(+)	10720	GenBank	partial	2	China	China	Homo sapiens	blood	2014-10	Dengue virus 2 isolate GZ8H/2019113/2014/II polyprotein (POLY) gene, complete cds
MW721470.1	Zhao,L., Zhang,L., Hong,W., Qiu,S., Wang,J., Zhang,F.	2022-04-30T00:00:00Z	GZ8H/2019098/2017/II	Dengue virus	Flavivirus	Flaviviridae	ssRNA(+)	10716	GenBank	partial	2	China	China	Homo sapiens	blood	2017-10	Dengue virus 2 isolate GZ8H/2019098/2017/II polyprotein (POLY) gene, complete cds
MW721469.1	Zhao,L., Zhang,L., Hong,W., Qiu,S., Wang,J., Zhang,F.	2022-04-30T00:00:00Z	GZ8H/2019089/2017/II	Dengue virus	Flavivirus	Flaviviridae	ssRNA(+)	10695	GenBank	partial	2	China	China	Homo sapiens	blood	2017-10	Dengue virus 2 isolate GZ8H/2019089/2017/II polyprotein (POLY) gene, complete cds
MW721468.1	Zhao,L., Zhang,L., Hong,W., Qiu,S., Wang,J., Zhang,F.	2022-04-30T00:00:00Z	GZ8H/2019086/2014/II	Dengue virus	Flavivirus	Flaviviridae	ssRNA(+)	10720	GenBank	partial	2	China	China	Homo sapiens	blood	2014-10	Dengue virus 2 isolate GZ8H/2019086/2014/II polyprotein (POLY) gene, complete cds
MW721467.1	Zhao,L., Zhang,L., Hong,W., Qiu,S., Wang,J., Zhang,F.	2022-04-30T00:00:00Z	GZ8H/2019084/2014/II	Dengue virus	Flavivirus	Flaviviridae	ssRNA(+)	10703	GenBank	partial	2	China	China	Homo sapiens	blood	2014-10	Dengue virus 2 isolate GZ8H/2019084/2014/II polyprotein (POLY) gene, complete cds
MW721466.1	Zhao,L., Zhang,L., Hong,W., Qiu,S., Wang,J., Zhang,F.	2022-04-30T00:00:00Z	GZ8H/2019067/2014/II	Dengue virus	Flavivirus	Flaviviridae	ssRNA(+)	10706	GenBank	partial	2	China	China	Homo sapiens	blood	2014-10	Dengue virus 2 isolate GZ8H/2019067/2014/II polyprotein (POLY) gene, complete cds
MW721465.1	Zhao,L., Zhang,L., Hong,W., Qiu,S., Wang,J., Zhang,F.	2022-04-30T00:00:00Z	GZ8H/2019065/2014/II	Dengue virus	Flavivirus	Flaviviridae	ssRNA(+)	10717	GenBank	partial	2	China	China	Homo sapiens	blood	2014-10	Dengue virus 2 isolate GZ8H/2019065/2014/II polyprotein (POLY) gene, complete cds
MW721464.1	Zhao,L., Zhang,L., Hong,W., Qiu,S., Wang,J., Zhang,F.	2022-04-30T00:00:00Z	GZ8H/2019057/2014/II	Dengue virus	Flavivirus	Flaviviridae	ssRNA(+)	10716	GenBank	partial	2	China	China	Homo sapiens	blood	2014-10	Dengue virus 2 isolate GZ8H/2019057/2014/II polyprotein (POLY) gene, complete cds
MW721463.1	Zhao,L., Zhang,L., Hong,W., Qiu,S., Wang,J., Zhang,F.	2022-04-30T00:00:00Z	GZ8H/2019049/2014/II	Dengue virus	Flavivirus	Flaviviridae	ssRNA(+)	10692	GenBank	partial	2	China	China	Homo sapiens	blood	2014-10	Dengue virus 2 isolate GZ8H/2019049/2014/II polyprotein (POLY) gene, complete cds
MW721462.1	Zhao,L., Zhang,L., Hong,W., Qiu,S., Wang,J., Zhang,F.	2022-04-30T00:00:00Z	GZ8H/2019041/2014/II	Dengue virus	Flavivirus	Flaviviridae	ssRNA(+)	10716	GenBank	partial	2	China	China	Homo sapiens	blood	2014-10	Dengue virus 2 isolate GZ8H/2019041/2014/II polyprotein (POLY) gene, complete cds
MW721461.1	Zhao,L., Zhang,L., Hong,W., Qiu,S., Wang,J., Zhang,F.	2022-04-30T00:00:00Z	GZ8H/2019012/2018/II	Dengue virus	Flavivirus	Flaviviridae	ssRNA(+)	10692	GenBank	partial	2	China	China	Homo sapiens	blood	2018-10	Dengue virus 2 isolate GZ8H/2019012/2018/II polyprotein (POLY) gene, complete cds
MW721460.1	Zhao,L., Zhang,L., Hong,W., Qiu,S., Wang,J., Zhang,F.	2022-04-30T00:00:00Z	GZ8H/2019003/2018/II	Dengue virus	Flavivirus	Flaviviridae	ssRNA(+)	10699	GenBank	partial	2	China	China	Homo sapiens	blood	2018-10	Dengue virus 2 isolate GZ8H/2019003/2018/II polyprotein (POLY) gene, complete cds
MW721459.1	Zhao,L., Zhang,L., Hong,W., Qiu,S., Wang,J., Zhang,F.	2022-04-30T00:00:00Z	GZ8H/2019001/2018/II	Dengue virus	Flavivirus	Flaviviridae	ssRNA(+)	10722	GenBank	complete	2	China	China	Homo sapiens	blood	2018-10	Dengue virus 2 isolate GZ8H/2019001/2018/II, complete genome
MW720957.1	Zhao,L., Zhang,L., Hong,W., Qiu,S., Wang,J., Zhang,F.	2022-04-30T00:00:00Z	GZ8H/2019187/2019/II	Dengue virus	Flavivirus	Flaviviridae	ssRNA(+)	10715	GenBank	partial	0	China	China	Homo sapiens	blood	2019-09	Dengue virus 2 isolate GZ8H/2019187/2019/II polyprotein (POLY) gene, complete cds
MW720956.1	Zhao,L., Zhang,L., Hong,W., Qiu,S., Wang,J., Zhang,F.	2022-04-30T00:00:00Z	GZ8H/2019169/2019/II	Dengue virus	Flavivirus	Flaviviridae	ssRNA(+)	10682	GenBank	partial	0	China	China	Homo sapiens	blood	2019-09	Dengue virus 2 isolate GZ8H/2019169/2019/II polyprotein (POLY) gene, complete cds
MW720955.1	Zhao,L., Zhang,L., Hong,W., Qiu,S., Wang,J., Zhang,F.	2022-04-30T00:00:00Z	GZ8H/2019168/2019/II	Dengue virus	Flavivirus	Flaviviridae	ssRNA(+)	10680	GenBank	partial	0	China	China	Homo sapiens	blood	2019-09	Dengue virus 2 isolate GZ8H/2019168/2019/II polyprotein (POLY) gene, complete cds
MW720954.1	Zhao,L., Zhang,L., Hong,W., Qiu,S., Wang,J., Zhang,F.	2022-04-30T00:00:00Z	GZ8H/2019167/2019/II	Dengue virus	Flavivirus	Flaviviridae	ssRNA(+)	10683	GenBank	partial	0	China	China	Homo sapiens	blood	2019-09	Dengue virus 2 isolate GZ8H/2019167/2019/II polyprotein (POLY) gene, complete cds
MW720953.1	Zhao,L., Zhang,L., Hong,W., Qiu,S., Wang,J., Zhang,F.	2022-04-30T00:00:00Z	GZ8H/2019166/2019/II	Dengue virus	Flavivirus	Flaviviridae	ssRNA(+)	10716	GenBank	partial	0	China	China	Homo sapiens	blood	2019-09	Dengue virus 2 isolate GZ8H/2019166/2019/II polyprotein (POLY) gene, complete cds
MW720952.1	Zhao,L., Zhang,L., Hong,W., Qiu,S., Wang,J., Zhang,F.	2022-04-30T00:00:00Z	GZ8H/2019165/2019/II	Dengue virus	Flavivirus	Flaviviridae	ssRNA(+)	10682	GenBank	partial	0	China	China	Homo sapiens	blood	2019-09	Dengue virus 2 isolate GZ8H/2019165/2019/II polyprotein (POLY) gene, complete cds
MW720951.1	Zhao,L., Zhang,L., Hong,W., Qiu,S., Wang,J., Zhang,F.	2022-04-30T00:00:00Z	GZ8H/2019164/2019/II	Dengue virus	Flavivirus	Flaviviridae	ssRNA(+)	10682	GenBank	partial	0	China	China	Homo sapiens	blood	2019-09	Dengue virus 2 isolate GZ8H/2019164/2019/II polyprotein (POLY) gene, complete cds
MW720950.1	Zhao,L., Zhang,L., Hong,W., Qiu,S., Wang,J., Zhang,F.	2022-04-30T00:00:00Z	GZ8H/2019163/2019/II	Dengue virus	Flavivirus	Flaviviridae	ssRNA(+)	10681	GenBank	partial	0	China	China	Homo sapiens	blood	2019-09	Dengue virus 2 isolate GZ8H/2019163/2019/II polyprotein (POLY) gene, complete cds
MW720949.1	Zhao,L., Zhang,L., Hong,W., Qiu,S., Wang,J., Zhang,F.	2022-04-30T00:00:00Z	GZ8H/2019162/2019/II	Dengue virus	Flavivirus	Flaviviridae	ssRNA(+)	10681	GenBank	partial	0	China	China	Homo sapiens	blood	2019-09	Dengue virus 2 isolate GZ8H/2019162/2019/II polyprotein (POLY) gene, complete cds
MW720948.1	Zhao,L., Zhang,L., Hong,W., Qiu,S., Wang,J., Zhang,F.	2022-04-30T00:00:00Z	GZ8H/2019161/2019/II	Dengue virus	Flavivirus	Flaviviridae	ssRNA(+)	10690	GenBank	partial	0	China	China	Homo sapiens	blood	2019-09	Dengue virus 2 isolate GZ8H/2019161/2019/II polyprotein (POLY) gene, complete cds
MW720947.1	Zhao,L., Zhang,L., Hong,W., Qiu,S., Wang,J., Zhang,F.	2022-04-30T00:00:00Z	GZ8H/2019160/2019/II	Dengue virus	Flavivirus	Flaviviridae	ssRNA(+)	10684	GenBank	partial	0	China	China	Homo sapiens	blood	2019-09	Dengue virus 2 isolate GZ8H/2019160/2019/II polyprotein (POLY) gene, complete cds
MW720946.1	Zhao,L., Zhang,L., Hong,W., Qiu,S., Wang,J., Zhang,F.	2022-04-30T00:00:00Z	GZ8H/2019159/2019/II	Dengue virus	Flavivirus	Flaviviridae	ssRNA(+)	10698	GenBank	partial	0	China	China	Homo sapiens	blood	2019-09	Dengue virus 2 isolate GZ8H/2019159/2019/II polyprotein (POLY) gene, complete cds
MW720945.1	Zhao,L., Zhang,L., Hong,W., Qiu,S., Wang,J., Zhang,F.	2022-04-30T00:00:00Z	GZ8H/2019158/2019/II	Dengue virus	Flavivirus	Flaviviridae	ssRNA(+)	10681	GenBank	partial	0	China	China	Homo sapiens	blood	2019-09	Dengue virus 2 isolate GZ8H/2019158/2019/II polyprotein (POLY) gene, complete cds
MW577855.1	Torres,M.C., Lima de Mendonca,M.C., Damasceno Dos Santos Rodrigues,C., Fonseca,V., Ribeiro,M.S., Brandao,A.P., Venancio da Cunha,R., Dias,A.I., Santos Vilas Boas,L., Felix,A.C., Alves Pereira,M., de Oliveira Pinto,L.M., Sakuntabhai,A., Bispo de Filippis,A.M., On Behalf Of ZikAction,C.O., Damasceno dos Santos Rodrigues,C., da Cunha,R.V.	2021-03-19T00:00:00Z	209	Dengue virus	Flavivirus	Flaviviridae	ssRNA(+)	10664	GenBank	partial	2	Brazil	Brazil	Homo sapiens	blood	2010-03-22	Dengue virus type 2 isolate 209 polyprotein (POLY) gene, complete cds
MW577854.1	Torres,M.C., Lima de Mendonca,M.C., Damasceno Dos Santos Rodrigues,C., Fonseca,V., Ribeiro,M.S., Brandao,A.P., Venancio da Cunha,R., Dias,A.I., Santos Vilas Boas,L., Felix,A.C., Alves Pereira,M., de Oliveira Pinto,L.M., Sakuntabhai,A., Bispo de Filippis,A.M., On Behalf Of ZikAction,C.O., Damasceno dos Santos Rodrigues,C., da Cunha,R.V.	2021-03-19T00:00:00Z	208	Dengue virus	Flavivirus	Flaviviridae	ssRNA(+)	10697	GenBank	partial	2	Brazil	Brazil	Homo sapiens	blood	2008-02-07	Dengue virus type 2 isolate 208 polyprotein (POLY) gene, complete cds
MW577853.1	Torres,M.C., Lima de Mendonca,M.C., Damasceno Dos Santos Rodrigues,C., Fonseca,V., Ribeiro,M.S., Brandao,A.P., Venancio da Cunha,R., Dias,A.I., Santos Vilas Boas,L., Felix,A.C., Alves Pereira,M., de Oliveira Pinto,L.M., Sakuntabhai,A., Bispo de Filippis,A.M., On Behalf Of ZikAction,C.O., Damasceno dos Santos Rodrigues,C., da Cunha,R.V.	2021-03-19T00:00:00Z	207	Dengue virus	Flavivirus	Flaviviridae	ssRNA(+)	10659	GenBank	partial	2	Brazil	Brazil	Homo sapiens	blood	2009-03-17	Dengue virus type 2 isolate 207 polyprotein (POLY) gene, complete cds
MW577852.1	Torres,M.C., Lima de Mendonca,M.C., Damasceno Dos Santos Rodrigues,C., Fonseca,V., Ribeiro,M.S., Brandao,A.P., Venancio da Cunha,R., Dias,A.I., Santos Vilas Boas,L., Felix,A.C., Alves Pereira,M., de Oliveira Pinto,L.M., Sakuntabhai,A., Bispo de Filippis,A.M., On Behalf Of ZikAction,C.O., Damasceno dos Santos Rodrigues,C., da Cunha,R.V.	2021-03-19T00:00:00Z	206	Dengue virus	Flavivirus	Flaviviridae	ssRNA(+)	10701	GenBank	partial	2	Brazil	Brazil	Homo sapiens	blood	2010-03-02	Dengue virus type 2 isolate 206 polyprotein (POLY) gene, complete cds
MW577851.1	Torres,M.C., Lima de Mendonca,M.C., Damasceno Dos Santos Rodrigues,C., Fonseca,V., Ribeiro,M.S., Brandao,A.P., Venancio da Cunha,R., Dias,A.I., Santos Vilas Boas,L., Felix,A.C., Alves Pereira,M., de Oliveira Pinto,L.M., Sakuntabhai,A., Bispo de Filippis,A.M., On Behalf Of ZikAction,C.O., Damasceno dos Santos Rodrigues,C., da Cunha,R.V.	2021-03-19T00:00:00Z	205	Dengue virus	Flavivirus	Flaviviridae	ssRNA(+)	10663	GenBank	partial	2	Brazil	Brazil	Homo sapiens	blood	2010-01-18	Dengue virus type 2 isolate 205 polyprotein (POLY) gene, complete cds
MW577850.1	Torres,M.C., Lima de Mendonca,M.C., Damasceno Dos Santos Rodrigues,C., Fonseca,V., Ribeiro,M.S., Brandao,A.P., Venancio da Cunha,R., Dias,A.I., Santos Vilas Boas,L., Felix,A.C., Alves Pereira,M., de Oliveira Pinto,L.M., Sakuntabhai,A., Bispo de Filippis,A.M., On Behalf Of ZikAction,C.O., Damasceno dos Santos Rodrigues,C., da Cunha,R.V.	2021-03-19T00:00:00Z	204	Dengue virus	Flavivirus	Flaviviridae	ssRNA(+)	10719	GenBank	partial	2	Brazil	Brazil	Homo sapiens	blood	2010-03-12	Dengue virus type 2 isolate 204 polyprotein (POLY) gene, complete cds
MW577849.1	Torres,M.C., Lima de Mendonca,M.C., Damasceno Dos Santos Rodrigues,C., Fonseca,V., Ribeiro,M.S., Brandao,A.P., Venancio da Cunha,R., Dias,A.I., Santos Vilas Boas,L., Felix,A.C., Alves Pereira,M., de Oliveira Pinto,L.M., Sakuntabhai,A., Bispo de Filippis,A.M., On Behalf Of ZikAction,C.O., Damasceno dos Santos Rodrigues,C., da Cunha,R.V.	2021-03-19T00:00:00Z	203	Dengue virus	Flavivirus	Flaviviridae	ssRNA(+)	10723	GenBank	complete	2	Brazil	Brazil	Homo sapiens	blood	2008-03-16	Dengue virus type 2 isolate 203, complete genome
MW577848.1	Torres,M.C., Lima de Mendonca,M.C., Damasceno Dos Santos Rodrigues,C., Fonseca,V., Ribeiro,M.S., Brandao,A.P., Venancio da Cunha,R., Dias,A.I., Santos Vilas Boas,L., Felix,A.C., Alves Pereira,M., de Oliveira Pinto,L.M., Sakuntabhai,A., Bispo de Filippis,A.M., On Behalf Of ZikAction,C.O., Damasceno dos Santos Rodrigues,C., da Cunha,R.V.	2021-03-19T00:00:00Z	202	Dengue virus	Flavivirus	Flaviviridae	ssRNA(+)	10720	GenBank	partial	2	Brazil	Brazil	Homo sapiens	blood	2010-04-04	Dengue virus type 2 isolate 202 polyprotein (POLY) gene, complete cds
MW577847.1	Torres,M.C., Lima de Mendonca,M.C., Damasceno Dos Santos Rodrigues,C., Fonseca,V., Ribeiro,M.S., Brandao,A.P., Venancio da Cunha,R., Dias,A.I., Santos Vilas Boas,L., Felix,A.C., Alves Pereira,M., de Oliveira Pinto,L.M., Sakuntabhai,A., Bispo de Filippis,A.M., On Behalf Of ZikAction,C.O., Damasceno dos Santos Rodrigues,C., da Cunha,R.V.	2021-03-19T00:00:00Z	201	Dengue virus	Flavivirus	Flaviviridae	ssRNA(+)	10673	GenBank	partial	2	Brazil	Brazil	Homo sapiens	blood	2008-02-08	Dengue virus type 2 isolate 201 polyprotein (POLY) gene, complete cds
MW577846.1	Torres,M.C., Lima de Mendonca,M.C., Damasceno Dos Santos Rodrigues,C., Fonseca,V., Ribeiro,M.S., Brandao,A.P., Venancio da Cunha,R., Dias,A.I., Santos Vilas Boas,L., Felix,A.C., Alves Pereira,M., de Oliveira Pinto,L.M., Sakuntabhai,A., Bispo de Filippis,A.M., On Behalf Of ZikAction,C.O., Damasceno dos Santos Rodrigues,C., da Cunha,R.V.	2021-03-19T00:00:00Z	200	Dengue virus	Flavivirus	Flaviviridae	ssRNA(+)	10711	GenBank	partial	2	Brazil	Brazil	Homo sapiens	blood	2008-04-23	Dengue virus type 2 isolate 200 polyprotein (POLY) gene, complete cds
MW577845.1	Torres,M.C., Lima de Mendonca,M.C., Damasceno Dos Santos Rodrigues,C., Fonseca,V., Ribeiro,M.S., Brandao,A.P., Venancio da Cunha,R., Dias,A.I., Santos Vilas Boas,L., Felix,A.C., Alves Pereira,M., de Oliveira Pinto,L.M., Sakuntabhai,A., Bispo de Filippis,A.M., On Behalf Of ZikAction,C.O., Damasceno dos Santos Rodrigues,C., da Cunha,R.V.	2021-03-19T00:00:00Z	199	Dengue virus	Flavivirus	Flaviviridae	ssRNA(+)	10689	GenBank	partial	2	Brazil	Brazil	Homo sapiens	blood	2008-12-05	Dengue virus type 2 isolate 199 polyprotein (POLY) gene, complete cds
MW577844.1	Torres,M.C., Lima de Mendonca,M.C., Damasceno Dos Santos Rodrigues,C., Fonseca,V., Ribeiro,M.S., Brandao,A.P., Venancio da Cunha,R., Dias,A.I., Santos Vilas Boas,L., Felix,A.C., Alves Pereira,M., de Oliveira Pinto,L.M., Sakuntabhai,A., Bispo de Filippis,A.M., On Behalf Of ZikAction,C.O., Damasceno dos Santos Rodrigues,C., da Cunha,R.V.	2021-03-19T00:00:00Z	198	Dengue virus	Flavivirus	Flaviviridae	ssRNA(+)	10689	GenBank	partial	2	Brazil	Brazil	Homo sapiens	blood	2008-04-23	Dengue virus type 2 isolate 198 polyprotein (POLY) gene, complete cds
MW577843.1	Torres,M.C., Lima de Mendonca,M.C., Damasceno Dos Santos Rodrigues,C., Fonseca,V., Ribeiro,M.S., Brandao,A.P., Venancio da Cunha,R., Dias,A.I., Santos Vilas Boas,L., Felix,A.C., Alves Pereira,M., de Oliveira Pinto,L.M., Sakuntabhai,A., Bispo de Filippis,A.M., On Behalf Of ZikAction,C.O., Damasceno dos Santos Rodrigues,C., da Cunha,R.V.	2021-03-19T00:00:00Z	197	Dengue virus	Flavivirus	Flaviviridae	ssRNA(+)	10662	GenBank	partial	2	Brazil	Brazil	Homo sapiens	blood	2008-04-23	Dengue virus type 2 isolate 197 polyprotein (POLY) gene, complete cds
MW577842.1	Torres,M.C., Lima de Mendonca,M.C., Damasceno Dos Santos Rodrigues,C., Fonseca,V., Ribeiro,M.S., Brandao,A.P., Venancio da Cunha,R., Dias,A.I., Santos Vilas Boas,L., Felix,A.C., Alves Pereira,M., de Oliveira Pinto,L.M., Sakuntabhai,A., Bispo de Filippis,A.M., On Behalf Of ZikAction,C.O., Damasceno dos Santos Rodrigues,C., da Cunha,R.V.	2021-03-19T00:00:00Z	196	Dengue virus	Flavivirus	Flaviviridae	ssRNA(+)	10701	GenBank	partial	2	Brazil	Brazil	Homo sapiens	blood	2010-03-24	Dengue virus type 2 isolate 196 polyprotein (POLY) gene, complete cds
MW577841.1	Torres,M.C., Lima de Mendonca,M.C., Damasceno Dos Santos Rodrigues,C., Fonseca,V., Ribeiro,M.S., Brandao,A.P., Venancio da Cunha,R., Dias,A.I., Santos Vilas Boas,L., Felix,A.C., Alves Pereira,M., de Oliveira Pinto,L.M., Sakuntabhai,A., Bispo de Filippis,A.M., On Behalf Of ZikAction,C.O., Damasceno dos Santos Rodrigues,C., da Cunha,R.V.	2021-03-19T00:00:00Z	195	Dengue virus	Flavivirus	Flaviviridae	ssRNA(+)	10683	GenBank	partial	2	Brazil	Brazil	Homo sapiens	blood	2010-03-18	Dengue virus type 2 isolate 195 polyprotein (POLY) gene, complete cds
MW577840.1	Torres,M.C., Lima de Mendonca,M.C., Damasceno Dos Santos Rodrigues,C., Fonseca,V., Ribeiro,M.S., Brandao,A.P., Venancio da Cunha,R., Dias,A.I., Santos Vilas Boas,L., Felix,A.C., Alves Pereira,M., de Oliveira Pinto,L.M., Sakuntabhai,A., Bispo de Filippis,A.M., On Behalf Of ZikAction,C.O., Damasceno dos Santos Rodrigues,C., da Cunha,R.V.	2021-03-19T00:00:00Z	194	Dengue virus	Flavivirus	Flaviviridae	ssRNA(+)	10684	GenBank	partial	2	Brazil	Brazil	Homo sapiens	blood	2011-04-07	Dengue virus type 2 isolate 194 polyprotein (POLY) gene, complete cds
MW577839.1	Torres,M.C., Lima de Mendonca,M.C., Damasceno Dos Santos Rodrigues,C., Fonseca,V., Ribeiro,M.S., Brandao,A.P., Venancio da Cunha,R., Dias,A.I., Santos Vilas Boas,L., Felix,A.C., Alves Pereira,M., de Oliveira Pinto,L.M., Sakuntabhai,A., Bispo de Filippis,A.M., On Behalf Of ZikAction,C.O., Damasceno dos Santos Rodrigues,C., da Cunha,R.V.	2021-03-19T00:00:00Z	193	Dengue virus	Flavivirus	Flaviviridae	ssRNA(+)	10715	GenBank	partial	2	Brazil	Brazil	Homo sapiens	blood	2019-05-08	Dengue virus type 2 isolate 193 polyprotein (POLY) gene, complete cds
MW577838.1	Torres,M.C., Lima de Mendonca,M.C., Damasceno Dos Santos Rodrigues,C., Fonseca,V., Ribeiro,M.S., Brandao,A.P., Venancio da Cunha,R., Dias,A.I., Santos Vilas Boas,L., Felix,A.C., Alves Pereira,M., de Oliveira Pinto,L.M., Sakuntabhai,A., Bispo de Filippis,A.M., On Behalf Of ZikAction,C.O., Damasceno dos Santos Rodrigues,C., da Cunha,R.V.	2021-03-19T00:00:00Z	192	Dengue virus	Flavivirus	Flaviviridae	ssRNA(+)	10719	GenBank	partial	2	Brazil	Brazil	Homo sapiens	blood	2011-02-16	Dengue virus type 2 isolate 192 polyprotein (POLY) gene, complete cds
MW577837.1	Torres,M.C., Lima de Mendonca,M.C., Damasceno Dos Santos Rodrigues,C., Fonseca,V., Ribeiro,M.S., Brandao,A.P., Venancio da Cunha,R., Dias,A.I., Santos Vilas Boas,L., Felix,A.C., Alves Pereira,M., de Oliveira Pinto,L.M., Sakuntabhai,A., Bispo de Filippis,A.M., On Behalf Of ZikAction,C.O., Damasceno dos Santos Rodrigues,C., da Cunha,R.V.	2021-03-19T00:00:00Z	191	Dengue virus	Flavivirus	Flaviviridae	ssRNA(+)	10677	GenBank	partial	2	Brazil	Brazil	Homo sapiens	blood	2009-09-16	Dengue virus type 2 isolate 191 polyprotein (POLY) gene, complete cds
MW577836.1	Torres,M.C., Lima de Mendonca,M.C., Damasceno Dos Santos Rodrigues,C., Fonseca,V., Ribeiro,M.S., Brandao,A.P., Venancio da Cunha,R., Dias,A.I., Santos Vilas Boas,L., Felix,A.C., Alves Pereira,M., de Oliveira Pinto,L.M., Sakuntabhai,A., Bispo de Filippis,A.M., On Behalf Of ZikAction,C.O., Damasceno dos Santos Rodrigues,C., da Cunha,R.V.	2021-03-19T00:00:00Z	190	Dengue virus	Flavivirus	Flaviviridae	ssRNA(+)	10681	GenBank	partial	2	Brazil	Brazil	Homo sapiens	blood	2019-03-19	Dengue virus type 2 isolate 190 polyprotein (POLY) gene, complete cds
MW577835.1	Torres,M.C., Lima de Mendonca,M.C., Damasceno Dos Santos Rodrigues,C., Fonseca,V., Ribeiro,M.S., Brandao,A.P., Venancio da Cunha,R., Dias,A.I., Santos Vilas Boas,L., Felix,A.C., Alves Pereira,M., de Oliveira Pinto,L.M., Sakuntabhai,A., Bispo de Filippis,A.M., On Behalf Of ZikAction,C.O., Damasceno dos Santos Rodrigues,C., da Cunha,R.V.	2021-03-19T00:00:00Z	189	Dengue virus	Flavivirus	Flaviviridae	ssRNA(+)	10719	GenBank	partial	2	Brazil	Brazil	Homo sapiens	blood	2010-01-30	Dengue virus type 2 isolate 189 polyprotein (POLY) gene, complete cds
MW577834.1	Torres,M.C., Lima de Mendonca,M.C., Damasceno Dos Santos Rodrigues,C., Fonseca,V., Ribeiro,M.S., Brandao,A.P., Venancio da Cunha,R., Dias,A.I., Santos Vilas Boas,L., Felix,A.C., Alves Pereira,M., de Oliveira Pinto,L.M., Sakuntabhai,A., Bispo de Filippis,A.M., On Behalf Of ZikAction,C.O., Damasceno dos Santos Rodrigues,C., da Cunha,R.V.	2021-03-19T00:00:00Z	188	Dengue virus	Flavivirus	Flaviviridae	ssRNA(+)	10723	GenBank	complete	2	Brazil	Brazil	Homo sapiens	blood	2011-02-16	Dengue virus type 2 isolate 188, complete genome
MW577833.1	Torres,M.C., Lima de Mendonca,M.C., Damasceno Dos Santos Rodrigues,C., Fonseca,V., Ribeiro,M.S., Brandao,A.P., Venancio da Cunha,R., Dias,A.I., Santos Vilas Boas,L., Felix,A.C., Alves Pereira,M., de Oliveira Pinto,L.M., Sakuntabhai,A., Bispo de Filippis,A.M., On Behalf Of ZikAction,C.O., Damasceno dos Santos Rodrigues,C., da Cunha,R.V.	2021-03-19T00:00:00Z	187	Dengue virus	Flavivirus	Flaviviridae	ssRNA(+)	10723	GenBank	complete	2	Brazil	Brazil	Homo sapiens	blood	2011-01-26	Dengue virus type 2 isolate 187, complete genome
MW577832.1	Torres,M.C., Lima de Mendonca,M.C., Damasceno Dos Santos Rodrigues,C., Fonseca,V., Ribeiro,M.S., Brandao,A.P., Venancio da Cunha,R., Dias,A.I., Santos Vilas Boas,L., Felix,A.C., Alves Pereira,M., de Oliveira Pinto,L.M., Sakuntabhai,A., Bispo de Filippis,A.M., On Behalf Of ZikAction,C.O., Damasceno dos Santos Rodrigues,C., da Cunha,R.V.	2021-03-19T00:00:00Z	186	Dengue virus	Flavivirus	Flaviviridae	ssRNA(+)	10723	GenBank	complete	2	Brazil	Brazil	Homo sapiens	blood	2010-03-09	Dengue virus type 2 isolate 186, complete genome
MW577831.1	Torres,M.C., Lima de Mendonca,M.C., Damasceno Dos Santos Rodrigues,C., Fonseca,V., Ribeiro,M.S., Brandao,A.P., Venancio da Cunha,R., Dias,A.I., Santos Vilas Boas,L., Felix,A.C., Alves Pereira,M., de Oliveira Pinto,L.M., Sakuntabhai,A., Bispo de Filippis,A.M., On Behalf Of ZikAction,C.O., Damasceno dos Santos Rodrigues,C., da Cunha,R.V.	2021-03-19T00:00:00Z	185	Dengue virus	Flavivirus	Flaviviridae	ssRNA(+)	10725	GenBank	complete	2	Brazil	Brazil	Homo sapiens	blood	2010-03-09	Dengue virus type 2 isolate 185, complete genome
MW577830.1	Torres,M.C., Lima de Mendonca,M.C., Damasceno Dos Santos Rodrigues,C., Fonseca,V., Ribeiro,M.S., Brandao,A.P., Venancio da Cunha,R., Dias,A.I., Santos Vilas Boas,L., Felix,A.C., Alves Pereira,M., de Oliveira Pinto,L.M., Sakuntabhai,A., Bispo de Filippis,A.M., On Behalf Of ZikAction,C.O., Damasceno dos Santos Rodrigues,C., da Cunha,R.V.	2021-03-19T00:00:00Z	184	Dengue virus	Flavivirus	Flaviviridae	ssRNA(+)	10724	GenBank	complete	2	Brazil	Brazil	Homo sapiens	blood	2019-04-15	Dengue virus type 2 isolate 184, complete genome
MW577829.1	Torres,M.C., Lima de Mendonca,M.C., Damasceno Dos Santos Rodrigues,C., Fonseca,V., Ribeiro,M.S., Brandao,A.P., Venancio da Cunha,R., Dias,A.I., Santos Vilas Boas,L., Felix,A.C., Alves Pereira,M., de Oliveira Pinto,L.M., Sakuntabhai,A., Bispo de Filippis,A.M., On Behalf Of ZikAction,C.O., Damasceno dos Santos Rodrigues,C., da Cunha,R.V.	2021-03-19T00:00:00Z	183	Dengue virus	Flavivirus	Flaviviridae	ssRNA(+)	10721	GenBank	partial	2	Brazil	Brazil	Homo sapiens	blood	2019-04-02	Dengue virus type 2 isolate 183 polyprotein (POLY) gene, complete cds
MW577828.1	Torres,M.C., Lima de Mendonca,M.C., Damasceno Dos Santos Rodrigues,C., Fonseca,V., Ribeiro,M.S., Brandao,A.P., Venancio da Cunha,R., Dias,A.I., Santos Vilas Boas,L., Felix,A.C., Alves Pereira,M., de Oliveira Pinto,L.M., Sakuntabhai,A., Bispo de Filippis,A.M., On Behalf Of ZikAction,C.O., Damasceno dos Santos Rodrigues,C., da Cunha,R.V.	2021-03-19T00:00:00Z	182	Dengue virus	Flavivirus	Flaviviridae	ssRNA(+)	10721	GenBank	partial	2	Brazil	Brazil	Homo sapiens	blood	2019-05-03	Dengue virus type 2 isolate 182 polyprotein (POLY) gene, complete cds
MW577827.1	Torres,M.C., Lima de Mendonca,M.C., Damasceno Dos Santos Rodrigues,C., Fonseca,V., Ribeiro,M.S., Brandao,A.P., Venancio da Cunha,R., Dias,A.I., Santos Vilas Boas,L., Felix,A.C., Alves Pereira,M., de Oliveira Pinto,L.M., Sakuntabhai,A., Bispo de Filippis,A.M., On Behalf Of ZikAction,C.O., Damasceno dos Santos Rodrigues,C., da Cunha,R.V.	2021-03-19T00:00:00Z	181	Dengue virus	Flavivirus	Flaviviridae	ssRNA(+)	10710	GenBank	partial	2	Brazil	Brazil	Homo sapiens	blood	2019-04-25	Dengue virus type 2 isolate 181 polyprotein (POLY) gene, complete cds
MW577826.1	Torres,M.C., Lima de Mendonca,M.C., Damasceno Dos Santos Rodrigues,C., Fonseca,V., Ribeiro,M.S., Brandao,A.P., Venancio da Cunha,R., Dias,A.I., Santos Vilas Boas,L., Felix,A.C., Alves Pereira,M., de Oliveira Pinto,L.M., Sakuntabhai,A., Bispo de Filippis,A.M., On Behalf Of ZikAction,C.O., Damasceno dos Santos Rodrigues,C., da Cunha,R.V.	2021-03-19T00:00:00Z	180	Dengue virus	Flavivirus	Flaviviridae	ssRNA(+)	10723	GenBank	partial	2	Brazil	Brazil	Homo sapiens	blood	2019-06-03	Dengue virus type 2 isolate 180 polyprotein (POLY) gene, complete cds
MW577825.1	Torres,M.C., Lima de Mendonca,M.C., Damasceno Dos Santos Rodrigues,C., Fonseca,V., Ribeiro,M.S., Brandao,A.P., Venancio da Cunha,R., Dias,A.I., Santos Vilas Boas,L., Felix,A.C., Alves Pereira,M., de Oliveira Pinto,L.M., Sakuntabhai,A., Bispo de Filippis,A.M., On Behalf Of ZikAction,C.O., Damasceno dos Santos Rodrigues,C., da Cunha,R.V.	2021-03-19T00:00:00Z	179	Dengue virus	Flavivirus	Flaviviridae	ssRNA(+)	10724	GenBank	complete	2	Brazil	Brazil	Homo sapiens	blood	2019-05-22	Dengue virus type 2 isolate 179, complete genome
MW577824.1	Torres,M.C., Lima de Mendonca,M.C., Damasceno Dos Santos Rodrigues,C., Fonseca,V., Ribeiro,M.S., Brandao,A.P., Venancio da Cunha,R., Dias,A.I., Santos Vilas Boas,L., Felix,A.C., Alves Pereira,M., de Oliveira Pinto,L.M., Sakuntabhai,A., Bispo de Filippis,A.M., On Behalf Of ZikAction,C.O., Damasceno dos Santos Rodrigues,C., da Cunha,R.V.	2021-03-19T00:00:00Z	178	Dengue virus	Flavivirus	Flaviviridae	ssRNA(+)	10724	GenBank	complete	2	Brazil	Brazil	Homo sapiens	blood	2019-05-20	Dengue virus type 2 isolate 178, complete genome
MW577823.1	Torres,M.C., Lima de Mendonca,M.C., Damasceno Dos Santos Rodrigues,C., Fonseca,V., Ribeiro,M.S., Brandao,A.P., Venancio da Cunha,R., Dias,A.I., Santos Vilas Boas,L., Felix,A.C., Alves Pereira,M., de Oliveira Pinto,L.M., Sakuntabhai,A., Bispo de Filippis,A.M., On Behalf Of ZikAction,C.O., Damasceno dos Santos Rodrigues,C., da Cunha,R.V.	2021-03-19T00:00:00Z	177	Dengue virus	Flavivirus	Flaviviridae	ssRNA(+)	10724	GenBank	complete	2	Brazil	Brazil	Homo sapiens	blood	2019-05-20	Dengue virus type 2 isolate 177, complete genome
MW577822.1	Torres,M.C., Lima de Mendonca,M.C., Damasceno Dos Santos Rodrigues,C., Fonseca,V., Ribeiro,M.S., Brandao,A.P., Venancio da Cunha,R., Dias,A.I., Santos Vilas Boas,L., Felix,A.C., Alves Pereira,M., de Oliveira Pinto,L.M., Sakuntabhai,A., Bispo de Filippis,A.M., On Behalf Of ZikAction,C.O., Damasceno dos Santos Rodrigues,C., da Cunha,R.V.	2021-03-19T00:00:00Z	175	Dengue virus	Flavivirus	Flaviviridae	ssRNA(+)	10725	GenBank	complete	2	Brazil	Brazil	Homo sapiens	blood	2019-03-11	Dengue virus type 2 isolate 175, complete genome
MW577821.1	Torres,M.C., Lima de Mendonca,M.C., Damasceno Dos Santos Rodrigues,C., Fonseca,V., Ribeiro,M.S., Brandao,A.P., Venancio da Cunha,R., Dias,A.I., Santos Vilas Boas,L., Felix,A.C., Alves Pereira,M., de Oliveira Pinto,L.M., Sakuntabhai,A., Bispo de Filippis,A.M., On Behalf Of ZikAction,C.O., Damasceno dos Santos Rodrigues,C., da Cunha,R.V.	2021-03-19T00:00:00Z	174	Dengue virus	Flavivirus	Flaviviridae	ssRNA(+)	10724	GenBank	complete	2	Brazil	Brazil	Homo sapiens	blood	2019-02-22	Dengue virus type 2 isolate 174, complete genome
MW577820.1	Torres,M.C., Lima de Mendonca,M.C., Damasceno Dos Santos Rodrigues,C., Fonseca,V., Ribeiro,M.S., Brandao,A.P., Venancio da Cunha,R., Dias,A.I., Santos Vilas Boas,L., Felix,A.C., Alves Pereira,M., de Oliveira Pinto,L.M., Sakuntabhai,A., Bispo de Filippis,A.M., On Behalf Of ZikAction,C.O., Damasceno dos Santos Rodrigues,C., da Cunha,R.V.	2021-03-19T00:00:00Z	173	Dengue virus	Flavivirus	Flaviviridae	ssRNA(+)	10722	GenBank	partial	2	Brazil	Brazil	Homo sapiens	blood	2019-01-29	Dengue virus type 2 isolate 173 polyprotein (POLY) gene, complete cds
MW577819.1	Torres,M.C., Lima de Mendonca,M.C., Damasceno Dos Santos Rodrigues,C., Fonseca,V., Ribeiro,M.S., Brandao,A.P., Venancio da Cunha,R., Dias,A.I., Santos Vilas Boas,L., Felix,A.C., Alves Pereira,M., de Oliveira Pinto,L.M., Sakuntabhai,A., Bispo de Filippis,A.M., On Behalf Of ZikAction,C.O., Damasceno dos Santos Rodrigues,C., da Cunha,R.V.	2021-03-19T00:00:00Z	172	Dengue virus	Flavivirus	Flaviviridae	ssRNA(+)	10724	GenBank	complete	2	Brazil	Brazil	Homo sapiens	blood	2019-04-09	Dengue virus type 2 isolate 172, complete genome
MW577818.1	Torres,M.C., Lima de Mendonca,M.C., Damasceno Dos Santos Rodrigues,C., Fonseca,V., Ribeiro,M.S., Brandao,A.P., Venancio da Cunha,R., Dias,A.I., Santos Vilas Boas,L., Felix,A.C., Alves Pereira,M., de Oliveira Pinto,L.M., Sakuntabhai,A., Bispo de Filippis,A.M., On Behalf Of ZikAction,C.O., Damasceno dos Santos Rodrigues,C., da Cunha,R.V.	2021-03-19T00:00:00Z	171	Dengue virus	Flavivirus	Flaviviridae	ssRNA(+)	10724	GenBank	complete	2	Brazil	Brazil	Homo sapiens	blood	2019-05-08	Dengue virus type 2 isolate 171, complete genome
MW577817.1	Torres,M.C., Lima de Mendonca,M.C., Damasceno Dos Santos Rodrigues,C., Fonseca,V., Ribeiro,M.S., Brandao,A.P., Venancio da Cunha,R., Dias,A.I., Santos Vilas Boas,L., Felix,A.C., Alves Pereira,M., de Oliveira Pinto,L.M., Sakuntabhai,A., Bispo de Filippis,A.M., On Behalf Of ZikAction,C.O., Damasceno dos Santos Rodrigues,C., da Cunha,R.V.	2021-03-19T00:00:00Z	170	Dengue virus	Flavivirus	Flaviviridae	ssRNA(+)	10725	GenBank	complete	2	Brazil	Brazil	Homo sapiens	blood	2019-04-26	Dengue virus type 2 isolate 170, complete genome
MW577816.1	Torres,M.C., Lima de Mendonca,M.C., Damasceno Dos Santos Rodrigues,C., Fonseca,V., Ribeiro,M.S., Brandao,A.P., Venancio da Cunha,R., Dias,A.I., Santos Vilas Boas,L., Felix,A.C., Alves Pereira,M., de Oliveira Pinto,L.M., Sakuntabhai,A., Bispo de Filippis,A.M., On Behalf Of ZikAction,C.O., Damasceno dos Santos Rodrigues,C., da Cunha,R.V.	2021-03-19T00:00:00Z	169	Dengue virus	Flavivirus	Flaviviridae	ssRNA(+)	10724	GenBank	complete	2	Brazil	Brazil	Homo sapiens	blood	2019-04-26	Dengue virus type 2 isolate 169, complete genome
MW577815.1	Torres,M.C., Lima de Mendonca,M.C., Damasceno Dos Santos Rodrigues,C., Fonseca,V., Ribeiro,M.S., Brandao,A.P., Venancio da Cunha,R., Dias,A.I., Santos Vilas Boas,L., Felix,A.C., Alves Pereira,M., de Oliveira Pinto,L.M., Sakuntabhai,A., Bispo de Filippis,A.M., On Behalf Of ZikAction,C.O., Damasceno dos Santos Rodrigues,C., da Cunha,R.V.	2021-03-19T00:00:00Z	168	Dengue virus	Flavivirus	Flaviviridae	ssRNA(+)	10725	GenBank	complete	2	Brazil	Brazil	Homo sapiens	blood	2019-04-26	Dengue virus type 2 isolate 168, complete genome
MW577814.1	Torres,M.C., Lima de Mendonca,M.C., Damasceno Dos Santos Rodrigues,C., Fonseca,V., Ribeiro,M.S., Brandao,A.P., Venancio da Cunha,R., Dias,A.I., Santos Vilas Boas,L., Felix,A.C., Alves Pereira,M., de Oliveira Pinto,L.M., Sakuntabhai,A., Bispo de Filippis,A.M., On Behalf Of ZikAction,C.O., Damasceno dos Santos Rodrigues,C., da Cunha,R.V.	2021-03-19T00:00:00Z	167	Dengue virus	Flavivirus	Flaviviridae	ssRNA(+)	10716	GenBank	partial	2	Brazil	Brazil	Homo sapiens	blood	2019-04-04	Dengue virus type 2 isolate 167 polyprotein (POLY) gene, complete cds
MW577813.1	Torres,M.C., Lima de Mendonca,M.C., Damasceno Dos Santos Rodrigues,C., Fonseca,V., Ribeiro,M.S., Brandao,A.P., Venancio da Cunha,R., Dias,A.I., Santos Vilas Boas,L., Felix,A.C., Alves Pereira,M., de Oliveira Pinto,L.M., Sakuntabhai,A., Bispo de Filippis,A.M., On Behalf Of ZikAction,C.O., Damasceno dos Santos Rodrigues,C., da Cunha,R.V.	2021-03-19T00:00:00Z	166	Dengue virus	Flavivirus	Flaviviridae	ssRNA(+)	10725	GenBank	complete	2	Brazil	Brazil	Homo sapiens	blood	2019-04-04	Dengue virus type 2 isolate 166, complete genome
MW577812.1	Torres,M.C., Lima de Mendonca,M.C., Damasceno Dos Santos Rodrigues,C., Fonseca,V., Ribeiro,M.S., Brandao,A.P., Venancio da Cunha,R., Dias,A.I., Santos Vilas Boas,L., Felix,A.C., Alves Pereira,M., de Oliveira Pinto,L.M., Sakuntabhai,A., Bispo de Filippis,A.M., On Behalf Of ZikAction,C.O., Damasceno dos Santos Rodrigues,C., da Cunha,R.V.	2021-03-19T00:00:00Z	163	Dengue virus	Flavivirus	Flaviviridae	ssRNA(+)	10707	GenBank	partial	2	Brazil	Brazil	Homo sapiens	blood	2019-05-02	Dengue virus type 2 isolate 163 polyprotein (POLY) gene, complete cds
MW577811.1	Torres,M.C., Lima de Mendonca,M.C., Damasceno Dos Santos Rodrigues,C., Fonseca,V., Ribeiro,M.S., Brandao,A.P., Venancio da Cunha,R., Dias,A.I., Santos Vilas Boas,L., Felix,A.C., Alves Pereira,M., de Oliveira Pinto,L.M., Sakuntabhai,A., Bispo de Filippis,A.M., On Behalf Of ZikAction,C.O., Damasceno dos Santos Rodrigues,C., da Cunha,R.V.	2021-03-19T00:00:00Z	162	Dengue virus	Flavivirus	Flaviviridae	ssRNA(+)	10722	GenBank	partial	2	Brazil	Brazil	Homo sapiens	blood	2019-05-02	Dengue virus type 2 isolate 162 polyprotein (POLY) gene, complete cds
MW577810.1	Torres,M.C., Lima de Mendonca,M.C., Damasceno Dos Santos Rodrigues,C., Fonseca,V., Ribeiro,M.S., Brandao,A.P., Venancio da Cunha,R., Dias,A.I., Santos Vilas Boas,L., Felix,A.C., Alves Pereira,M., de Oliveira Pinto,L.M., Sakuntabhai,A., Bispo de Filippis,A.M., On Behalf Of ZikAction,C.O., Damasceno dos Santos Rodrigues,C., da Cunha,R.V.	2021-03-19T00:00:00Z	161	Dengue virus	Flavivirus	Flaviviridae	ssRNA(+)	10701	GenBank	partial	2	Brazil	Brazil	Homo sapiens	blood	2019-05-08	Dengue virus type 2 isolate 161 polyprotein (POLY) gene, complete cds
MW577809.1	Torres,M.C., Lima de Mendonca,M.C., Damasceno Dos Santos Rodrigues,C., Fonseca,V., Ribeiro,M.S., Brandao,A.P., Venancio da Cunha,R., Dias,A.I., Santos Vilas Boas,L., Felix,A.C., Alves Pereira,M., de Oliveira Pinto,L.M., Sakuntabhai,A., Bispo de Filippis,A.M., On Behalf Of ZikAction,C.O., Damasceno dos Santos Rodrigues,C., da Cunha,R.V.	2021-03-19T00:00:00Z	160	Dengue virus	Flavivirus	Flaviviridae	ssRNA(+)	10699	GenBank	partial	2	Brazil	Brazil	Homo sapiens	blood	2019-04-28	Dengue virus type 2 isolate 160 polyprotein (POLY) gene, complete cds
MW512498.1	Yenamandra,S.P., Koo,C., Chiang,S., Lim,H.S.J., Yeo,Z.Y., Ng,L.C., Hapuarachchi,H.C.	2021-07-09T00:00:00Z	SG(EHI)D2/3725Y19	Dengue virus	Flavivirus	Flaviviridae	ssRNA(+)	10721	GenBank	complete	DENV-2_cosmopolitan	Singapore	Singapore	Homo sapiens	blood	2019	Dengue virus type 2 isolate SG(EHI)D2/3725Y19, complete genome
MW512497.1	Yenamandra,S.P., Koo,C., Chiang,S., Lim,H.S.J., Yeo,Z.Y., Ng,L.C., Hapuarachchi,H.C.	2021-07-09T00:00:00Z	SG(EHI)D2/7344Y19	Dengue virus	Flavivirus	Flaviviridae	ssRNA(+)	10721	GenBank	complete	DENV-2_cosmopolitan	Singapore	Singapore	Homo sapiens	blood	2019	Dengue virus type 2 isolate SG(EHI)D2/7344Y19, complete genome
MW512496.1	Yenamandra,S.P., Koo,C., Chiang,S., Lim,H.S.J., Yeo,Z.Y., Ng,L.C., Hapuarachchi,H.C.	2021-07-09T00:00:00Z	SG(EHI)D2/4238Y19	Dengue virus	Flavivirus	Flaviviridae	ssRNA(+)	10721	GenBank	complete	DENV-2_cosmopolitan	Singapore	Singapore	Homo sapiens	blood	2019	Dengue virus type 2 isolate SG(EHI)D2/4238Y19, complete genome
MW512495.1	Yenamandra,S.P., Koo,C., Chiang,S., Lim,H.S.J., Yeo,Z.Y., Ng,L.C., Hapuarachchi,H.C.	2021-07-09T00:00:00Z	SG(EHI)D2/4005Y19	Dengue virus	Flavivirus	Flaviviridae	ssRNA(+)	10690	GenBank	partial	DENV-2_cosmopolitan	Singapore	Singapore	Homo sapiens	blood	2019	Dengue virus type 2 isolate SG(EHI)D2/4005Y19 polyprotein (POLY) gene, complete cds
MW512494.1	Yenamandra,S.P., Koo,C., Chiang,S., Lim,H.S.J., Yeo,Z.Y., Ng,L.C., Hapuarachchi,H.C.	2021-07-09T00:00:00Z	SG(EHI)D2/7537Y19	Dengue virus	Flavivirus	Flaviviridae	ssRNA(+)	10723	GenBank	complete	DENV-2_cosmopolitan	Singapore	Singapore	Homo sapiens	blood	2019	Dengue virus type 2 isolate SG(EHI)D2/7537Y19, complete genome
MW512493.1	Yenamandra,S.P., Koo,C., Chiang,S., Lim,H.S.J., Yeo,Z.Y., Ng,L.C., Hapuarachchi,H.C.	2021-07-09T00:00:00Z	SG(EHI)D2/1897Y19	Dengue virus	Flavivirus	Flaviviridae	ssRNA(+)	10723	GenBank	complete	DENV-2_cosmopolitan	Singapore	Singapore	Homo sapiens	blood	2019	Dengue virus type 2 isolate SG(EHI)D2/1897Y19, complete genome
MW512492.1	Yenamandra,S.P., Koo,C., Chiang,S., Lim,H.S.J., Yeo,Z.Y., Ng,L.C., Hapuarachchi,H.C.	2021-07-09T00:00:00Z	SG(EHI)D2/2038Y19	Dengue virus	Flavivirus	Flaviviridae	ssRNA(+)	10723	GenBank	complete	DENV-2_cosmopolitan	Singapore	Singapore	Homo sapiens	blood	2019	Dengue virus type 2 isolate SG(EHI)D2/2038Y19, complete genome
MW512491.1	Yenamandra,S.P., Koo,C., Chiang,S., Lim,H.S.J., Yeo,Z.Y., Ng,L.C., Hapuarachchi,H.C.	2021-07-09T00:00:00Z	SG(EHI)D2/4143Y19	Dengue virus	Flavivirus	Flaviviridae	ssRNA(+)	10723	GenBank	complete	DENV-2_cosmopolitan	Singapore	Singapore	Homo sapiens	blood	2019	Dengue virus type 2 isolate SG(EHI)D2/4143Y19, complete genome
MW512490.1	Yenamandra,S.P., Koo,C., Chiang,S., Lim,H.S.J., Yeo,Z.Y., Ng,L.C., Hapuarachchi,H.C.	2021-07-09T00:00:00Z	SG(EHI)D2/6437Y19	Dengue virus	Flavivirus	Flaviviridae	ssRNA(+)	10723	GenBank	complete	DENV-2_cosmopolitan	Singapore	Singapore	Homo sapiens	blood	2019	Dengue virus type 2 isolate SG(EHI)D2/6437Y19, complete genome
MW512489.1	Yenamandra,S.P., Koo,C., Chiang,S., Lim,H.S.J., Yeo,Z.Y., Ng,L.C., Hapuarachchi,H.C.	2021-07-09T00:00:00Z	SG(EHI)D2/33136Y18	Dengue virus	Flavivirus	Flaviviridae	ssRNA(+)	10723	GenBank	complete	DENV-2_cosmopolitan	Singapore	Singapore	Homo sapiens	blood	2018	Dengue virus type 2 isolate SG(EHI)D2/33136Y18, complete genome
MW512488.1	Yenamandra,S.P., Koo,C., Chiang,S., Lim,H.S.J., Yeo,Z.Y., Ng,L.C., Hapuarachchi,H.C.	2021-07-09T00:00:00Z	SG(EHI)D2/50047Y18	Dengue virus	Flavivirus	Flaviviridae	ssRNA(+)	10721	GenBank	complete	DENV-2_cosmopolitan	Singapore	Singapore	Homo sapiens	blood	2018	Dengue virus type 2 isolate SG(EHI)D2/50047Y18, complete genome
MW512487.1	Yenamandra,S.P., Koo,C., Chiang,S., Lim,H.S.J., Yeo,Z.Y., Ng,L.C., Hapuarachchi,H.C.	2021-07-09T00:00:00Z	SG(EHI)D2/52478Y18	Dengue virus	Flavivirus	Flaviviridae	ssRNA(+)	10721	GenBank	complete	DENV-2_cosmopolitan	Singapore	Singapore	Homo sapiens	blood	2018	Dengue virus type 2 isolate SG(EHI)D2/52478Y18, complete genome
MW512486.1	Yenamandra,S.P., Koo,C., Chiang,S., Lim,H.S.J., Yeo,Z.Y., Ng,L.C., Hapuarachchi,H.C.	2021-07-09T00:00:00Z	SG(EHI)D2/44357Y18	Dengue virus	Flavivirus	Flaviviridae	ssRNA(+)	10721	GenBank	complete	DENV-2_cosmopolitan	Singapore	Singapore	Homo sapiens	blood	2018	Dengue virus type 2 isolate SG(EHI)D2/44357Y18, complete genome
MW512485.1	Yenamandra,S.P., Koo,C., Chiang,S., Lim,H.S.J., Yeo,Z.Y., Ng,L.C., Hapuarachchi,H.C.	2021-07-09T00:00:00Z	SG(EHI)D2/42870Y18	Dengue virus	Flavivirus	Flaviviridae	ssRNA(+)	10723	GenBank	complete	DENV-2_cosmopolitan	Singapore	Singapore	Homo sapiens	blood	2018	Dengue virus type 2 isolate SG(EHI)D2/42870Y18, complete genome
MW512484.1	Yenamandra,S.P., Koo,C., Chiang,S., Lim,H.S.J., Yeo,Z.Y., Ng,L.C., Hapuarachchi,H.C.	2021-07-09T00:00:00Z	SG(EHI)D2/6133Y18	Dengue virus	Flavivirus	Flaviviridae	ssRNA(+)	10686	GenBank	partial	DENV-2_cosmopolitan	Singapore	Singapore	Homo sapiens	blood	2018	Dengue virus type 2 isolate SG(EHI)D2/6133Y18 polyprotein (POLY) gene, complete cds
MW512483.1	Yenamandra,S.P., Koo,C., Chiang,S., Lim,H.S.J., Yeo,Z.Y., Ng,L.C., Hapuarachchi,H.C.	2021-07-09T00:00:00Z	SG(EHI)D2/35295Y18	Dengue virus	Flavivirus	Flaviviridae	ssRNA(+)	10723	GenBank	complete	DENV-2_cosmopolitan	Singapore	Singapore	Homo sapiens	blood	2018	Dengue virus type 2 isolate SG(EHI)D2/35295Y18, complete genome
MW512482.1	Yenamandra,S.P., Koo,C., Chiang,S., Lim,H.S.J., Yeo,Z.Y., Ng,L.C., Hapuarachchi,H.C.	2021-07-09T00:00:00Z	SG(EHI)D2/23307Y18	Dengue virus	Flavivirus	Flaviviridae	ssRNA(+)	10713	GenBank	complete	DENV-2_cosmopolitan	Singapore	Singapore	Homo sapiens	blood	2018	Dengue virus type 2 isolate SG(EHI)D2/23307Y18, complete genome
MW512481.1	Yenamandra,S.P., Koo,C., Chiang,S., Lim,H.S.J., Yeo,Z.Y., Ng,L.C., Hapuarachchi,H.C.	2021-07-09T00:00:00Z	SG(EHI)D2/51293Y18	Dengue virus	Flavivirus	Flaviviridae	ssRNA(+)	10723	GenBank	complete	DENV-2_cosmopolitan	Singapore	Singapore	Homo sapiens	blood	2018	Dengue virus type 2 isolate SG(EHI)D2/51293Y18, complete genome
MW512480.1	Yenamandra,S.P., Koo,C., Chiang,S., Lim,H.S.J., Yeo,Z.Y., Ng,L.C., Hapuarachchi,H.C.	2021-07-09T00:00:00Z	SG(EHI)D2/27574Y18	Dengue virus	Flavivirus	Flaviviridae	ssRNA(+)	10723	GenBank	complete	DENV-2_cosmopolitan	Singapore	Singapore	Homo sapiens	blood	2018	Dengue virus type 2 isolate SG(EHI)D2/27574Y18, complete genome
MW512479.1	Yenamandra,S.P., Koo,C., Chiang,S., Lim,H.S.J., Yeo,Z.Y., Ng,L.C., Hapuarachchi,H.C.	2021-07-09T00:00:00Z	SG(EHI)D2/30533Y18	Dengue virus	Flavivirus	Flaviviridae	ssRNA(+)	10723	GenBank	complete	DENV-2_cosmopolitan	Singapore	Singapore	Homo sapiens	blood	2018	Dengue virus type 2 isolate SG(EHI)D2/30533Y18, complete genome
MW512478.1	Yenamandra,S.P., Koo,C., Chiang,S., Lim,H.S.J., Yeo,Z.Y., Ng,L.C., Hapuarachchi,H.C.	2021-07-09T00:00:00Z	SG(EHI)D2/26420Y17	Dengue virus	Flavivirus	Flaviviridae	ssRNA(+)	10681	GenBank	partial	DENV-2_cosmopolitan	Singapore	Singapore	Homo sapiens	blood	2017	Dengue virus type 2 isolate SG(EHI)D2/26420Y17 polyprotein (POLY) gene, complete cds
MW512477.1	Yenamandra,S.P., Koo,C., Chiang,S., Lim,H.S.J., Yeo,Z.Y., Ng,L.C., Hapuarachchi,H.C.	2021-07-09T00:00:00Z	SG(EHI)D2/23127Y17	Dengue virus	Flavivirus	Flaviviridae	ssRNA(+)	10723	GenBank	complete	DENV-2_cosmopolitan	Singapore	Singapore	Homo sapiens	blood	2017	Dengue virus type 2 isolate SG(EHI)D2/23127Y17, complete genome
MW512476.1	Yenamandra,S.P., Koo,C., Chiang,S., Lim,H.S.J., Yeo,Z.Y., Ng,L.C., Hapuarachchi,H.C.	2021-07-09T00:00:00Z	SG(EHI)D2/26393Y17	Dengue virus	Flavivirus	Flaviviridae	ssRNA(+)	10723	GenBank	complete	DENV-2_cosmopolitan	Singapore	Singapore	Homo sapiens	blood	2017	Dengue virus type 2 isolate SG(EHI)D2/26393Y17, complete genome
MW512475.1	Yenamandra,S.P., Koo,C., Chiang,S., Lim,H.S.J., Yeo,Z.Y., Ng,L.C., Hapuarachchi,H.C.	2021-07-09T00:00:00Z	SG(EHI)D2/34054Y17	Dengue virus	Flavivirus	Flaviviridae	ssRNA(+)	10723	GenBank	complete	DENV-2_cosmopolitan	Singapore	Singapore	Homo sapiens	blood	2017	Dengue virus type 2 isolate SG(EHI)D2/34054Y17, complete genome
MW512474.1	Yenamandra,S.P., Koo,C., Chiang,S., Lim,H.S.J., Yeo,Z.Y., Ng,L.C., Hapuarachchi,H.C.	2021-07-09T00:00:00Z	SG(EHI)D2/6407Y17	Dengue virus	Flavivirus	Flaviviridae	ssRNA(+)	10723	GenBank	complete	DENV-2_cosmopolitan	Singapore	Singapore	Homo sapiens	blood	2017	Dengue virus type 2 isolate SG(EHI)D2/6407Y17, complete genome
MW512473.1	Yenamandra,S.P., Koo,C., Chiang,S., Lim,H.S.J., Yeo,Z.Y., Ng,L.C., Hapuarachchi,H.C.	2021-07-09T00:00:00Z	SG(EHI)D2/28876Y17	Dengue virus	Flavivirus	Flaviviridae	ssRNA(+)	10723	GenBank	complete	DENV-2_cosmopolitan	Singapore	Singapore	Homo sapiens	blood	2017	Dengue virus type 2 isolate SG(EHI)D2/28876Y17, complete genome
MW512472.1	Yenamandra,S.P., Koo,C., Chiang,S., Lim,H.S.J., Yeo,Z.Y., Ng,L.C., Hapuarachchi,H.C.	2021-07-09T00:00:00Z	SG(EHI)D2/32479Y17	Dengue virus	Flavivirus	Flaviviridae	ssRNA(+)	10723	GenBank	complete	DENV-2_cosmopolitan	Singapore	Singapore	Homo sapiens	blood	2017	Dengue virus type 2 isolate SG(EHI)D2/32479Y17, complete genome
MW512471.1	Yenamandra,S.P., Koo,C., Chiang,S., Lim,H.S.J., Yeo,Z.Y., Ng,L.C., Hapuarachchi,H.C.	2021-07-09T00:00:00Z	SG(EHI)D2/19665Y17	Dengue virus	Flavivirus	Flaviviridae	ssRNA(+)	10723	GenBank	complete	DENV-2_cosmopolitan	Singapore	Singapore	Homo sapiens	blood	2017	Dengue virus type 2 isolate SG(EHI)D2/19665Y17, complete genome
MW512470.1	Yenamandra,S.P., Koo,C., Chiang,S., Lim,H.S.J., Yeo,Z.Y., Ng,L.C., Hapuarachchi,H.C.	2021-07-09T00:00:00Z	SG(EHI)D2/38114Y17	Dengue virus	Flavivirus	Flaviviridae	ssRNA(+)	10718	GenBank	complete	DENV-2_cosmopolitan	Singapore	Singapore	Homo sapiens	blood	2017	Dengue virus type 2 isolate SG(EHI)D2/38114Y17, complete genome
MW512469.1	Yenamandra,S.P., Koo,C., Chiang,S., Lim,H.S.J., Yeo,Z.Y., Ng,L.C., Hapuarachchi,H.C.	2021-07-09T00:00:00Z	SG(EHI)D2/44766Y17	Dengue virus	Flavivirus	Flaviviridae	ssRNA(+)	10718	GenBank	complete	DENV-2_cosmopolitan	Singapore	Singapore	Homo sapiens	blood	2017	Dengue virus type 2 isolate SG(EHI)D2/44766Y17, complete genome
MW512468.1	Yenamandra,S.P., Koo,C., Chiang,S., Lim,H.S.J., Yeo,Z.Y., Ng,L.C., Hapuarachchi,H.C.	2021-07-09T00:00:00Z	SG(EHI)D2/36248Y17	Dengue virus	Flavivirus	Flaviviridae	ssRNA(+)	10723	GenBank	complete	DENV-2_cosmopolitan	Singapore	Singapore	Homo sapiens	blood	2017	Dengue virus type 2 isolate SG(EHI)D2/36248Y17, complete genome
MW512467.1	Yenamandra,S.P., Koo,C., Chiang,S., Lim,H.S.J., Yeo,Z.Y., Ng,L.C., Hapuarachchi,H.C.	2021-07-09T00:00:00Z	SG(EHI)D2/34992Y16	Dengue virus	Flavivirus	Flaviviridae	ssRNA(+)	10723	GenBank	complete	DENV-2_cosmopolitan	Singapore	Singapore	Homo sapiens	blood	2016	Dengue virus type 2 isolate SG(EHI)D2/34992Y16, complete genome
MW512466.1	Yenamandra,S.P., Koo,C., Chiang,S., Lim,H.S.J., Yeo,Z.Y., Ng,L.C., Hapuarachchi,H.C.	2021-07-09T00:00:00Z	SG(EHI)D2/17647Y16	Dengue virus	Flavivirus	Flaviviridae	ssRNA(+)	10693	GenBank	partial	DENV-2_cosmopolitan	Singapore	Singapore	Homo sapiens	blood	2016	Dengue virus type 2 isolate SG(EHI)D2/17647Y16 polyprotein (POLY) gene, complete cds
MW512465.1	Yenamandra,S.P., Koo,C., Chiang,S., Lim,H.S.J., Yeo,Z.Y., Ng,L.C., Hapuarachchi,H.C.	2021-07-09T00:00:00Z	SG(EHI)D2/26254Y16	Dengue virus	Flavivirus	Flaviviridae	ssRNA(+)	10723	GenBank	complete	DENV-2_cosmopolitan	Singapore	Singapore	Homo sapiens	blood	2016	Dengue virus type 2 isolate SG(EHI)D2/26254Y16, complete genome
MW512464.1	Yenamandra,S.P., Koo,C., Chiang,S., Lim,H.S.J., Yeo,Z.Y., Ng,L.C., Hapuarachchi,H.C.	2021-07-09T00:00:00Z	SG(EHI)D2/43733Y16	Dengue virus	Flavivirus	Flaviviridae	ssRNA(+)	10707	GenBank	partial	DENV-2_cosmopolitan	Singapore	Singapore	Homo sapiens	blood	2016	Dengue virus type 2 isolate SG(EHI)D2/43733Y16 polyprotein (POLY) gene, complete cds
MW512463.1	Yenamandra,S.P., Koo,C., Chiang,S., Lim,H.S.J., Yeo,Z.Y., Ng,L.C., Hapuarachchi,H.C.	2021-07-09T00:00:00Z	SG(EHI)D2/51919Y16	Dengue virus	Flavivirus	Flaviviridae	ssRNA(+)	10697	GenBank	partial	DENV-2_cosmopolitan	Singapore	Singapore	Homo sapiens	blood	2016	Dengue virus type 2 isolate SG(EHI)D2/51919Y16 polyprotein (POLY) gene, complete cds
MW512462.1	Yenamandra,S.P., Koo,C., Chiang,S., Lim,H.S.J., Yeo,Z.Y., Ng,L.C., Hapuarachchi,H.C.	2021-07-09T00:00:00Z	SG(EHI)D2/2204Y16	Dengue virus	Flavivirus	Flaviviridae	ssRNA(+)	10723	GenBank	complete	DENV-2_cosmopolitan	Singapore	Singapore	Homo sapiens	blood	2016	Dengue virus type 2 isolate SG(EHI)D2/2204Y16, complete genome
MW512461.1	Yenamandra,S.P., Koo,C., Chiang,S., Lim,H.S.J., Yeo,Z.Y., Ng,L.C., Hapuarachchi,H.C.	2021-07-09T00:00:00Z	SG(EHI)D2/35114Y16	Dengue virus	Flavivirus	Flaviviridae	ssRNA(+)	10723	GenBank	complete	DENV-2_cosmopolitan	Singapore	Singapore	Homo sapiens	blood	2016	Dengue virus type 2 isolate SG(EHI)D2/35114Y16, complete genome
MW512460.1	Yenamandra,S.P., Koo,C., Chiang,S., Lim,H.S.J., Yeo,Z.Y., Ng,L.C., Hapuarachchi,H.C.	2021-07-09T00:00:00Z	SG(EHI)D2/43649Y16	Dengue virus	Flavivirus	Flaviviridae	ssRNA(+)	10712	GenBank	partial	DENV-2_cosmopolitan	Singapore	Singapore	Homo sapiens	blood	2016	Dengue virus type 2 isolate SG(EHI)D2/43649Y16 polyprotein (POLY) gene, complete cds
MW512459.1	Yenamandra,S.P., Koo,C., Chiang,S., Lim,H.S.J., Yeo,Z.Y., Ng,L.C., Hapuarachchi,H.C.	2021-07-09T00:00:00Z	SG(EHI)D2/28006Y16	Dengue virus	Flavivirus	Flaviviridae	ssRNA(+)	10691	GenBank	partial	DENV-2_cosmopolitan	Singapore	Singapore	Homo sapiens	blood	2016	Dengue virus type 2 isolate SG(EHI)D2/28006Y16 polyprotein (POLY) gene, complete cds
MW512458.1	Yenamandra,S.P., Koo,C., Chiang,S., Lim,H.S.J., Yeo,Z.Y., Ng,L.C., Hapuarachchi,H.C.	2021-07-09T00:00:00Z	SG(EHI)D2/9637Y16	Dengue virus	Flavivirus	Flaviviridae	ssRNA(+)	10723	GenBank	complete	DENV-2_cosmopolitan	Singapore	Singapore	Homo sapiens	blood	2016	Dengue virus type 2 isolate SG(EHI)D2/9637Y16, complete genome
MW512457.1	Yenamandra,S.P., Koo,C., Chiang,S., Lim,H.S.J., Yeo,Z.Y., Ng,L.C., Hapuarachchi,H.C.	2021-07-09T00:00:00Z	SG(EHI)D2/15033Y16	Dengue virus	Flavivirus	Flaviviridae	ssRNA(+)	10723	GenBank	complete	DENV-2_cosmopolitan	Singapore	Singapore	Homo sapiens	blood	2016	Dengue virus type 2 isolate SG(EHI)D2/15033Y16, complete genome
MW512456.1	Yenamandra,S.P., Koo,C., Chiang,S., Lim,H.S.J., Yeo,Z.Y., Ng,L.C., Hapuarachchi,H.C.	2021-07-09T00:00:00Z	SG(EHI)D2/4869Y16	Dengue virus	Flavivirus	Flaviviridae	ssRNA(+)	10723	GenBank	complete	DENV-2_cosmopolitan	Singapore	Singapore	Homo sapiens	blood	2016	Dengue virus type 2 isolate SG(EHI)D2/4869Y16, complete genome
MW512455.1	Yenamandra,S.P., Koo,C., Chiang,S., Lim,H.S.J., Yeo,Z.Y., Ng,L.C., Hapuarachchi,H.C.	2021-07-09T00:00:00Z	SG(EHI)D2/14868Y16	Dengue virus	Flavivirus	Flaviviridae	ssRNA(+)	10691	GenBank	partial	DENV-2_cosmopolitan	Singapore	Singapore	Homo sapiens	blood	2016	Dengue virus type 2 isolate SG(EHI)D2/14868Y16 polyprotein (POLY) gene, complete cds
MW512454.1	Yenamandra,S.P., Koo,C., Chiang,S., Lim,H.S.J., Yeo,Z.Y., Ng,L.C., Hapuarachchi,H.C.	2021-07-09T00:00:00Z	SG(EHI)D2/33808Y16	Dengue virus	Flavivirus	Flaviviridae	ssRNA(+)	10723	GenBank	complete	DENV-2_cosmopolitan	Singapore	Singapore	Homo sapiens	blood	2016	Dengue virus type 2 isolate SG(EHI)D2/33808Y16, complete genome
MW512453.1	Yenamandra,S.P., Koo,C., Chiang,S., Lim,H.S.J., Yeo,Z.Y., Ng,L.C., Hapuarachchi,H.C.	2021-07-09T00:00:00Z	SG(EHI)D2/7250Y16	Dengue virus	Flavivirus	Flaviviridae	ssRNA(+)	10693	GenBank	partial	DENV-2_cosmopolitan	Singapore	Singapore	Homo sapiens	blood	2016	Dengue virus type 2 isolate SG(EHI)D2/7250Y16 polyprotein (POLY) gene, complete cds
MW512452.1	Yenamandra,S.P., Koo,C., Chiang,S., Lim,H.S.J., Yeo,Z.Y., Ng,L.C., Hapuarachchi,H.C.	2021-07-09T00:00:00Z	SG(EHI)D2/8009Y16	Dengue virus	Flavivirus	Flaviviridae	ssRNA(+)	10650	GenBank	partial	DENV-2_cosmopolitan	Singapore	Singapore	Homo sapiens	blood	2016	Dengue virus type 2 isolate SG(EHI)D2/8009Y16 polyprotein (POLY) gene, complete cds
MW512451.1	Yenamandra,S.P., Koo,C., Chiang,S., Lim,H.S.J., Yeo,Z.Y., Ng,L.C., Hapuarachchi,H.C.	2021-07-09T00:00:00Z	SG(EHI)D2/42883Y16	Dengue virus	Flavivirus	Flaviviridae	ssRNA(+)	10723	GenBank	complete	DENV-2_cosmopolitan	Singapore	Singapore	Homo sapiens	blood	2016	Dengue virus type 2 isolate SG(EHI)D2/42883Y16, complete genome
MW512450.1	Yenamandra,S.P., Koo,C., Chiang,S., Lim,H.S.J., Yeo,Z.Y., Ng,L.C., Hapuarachchi,H.C.	2021-07-09T00:00:00Z	SG(EHI)D2/29864Y16	Dengue virus	Flavivirus	Flaviviridae	ssRNA(+)	10723	GenBank	complete	DENV-2_cosmopolitan	Singapore	Singapore	Homo sapiens	blood	2016	Dengue virus type 2 isolate SG(EHI)D2/29864Y16, complete genome
MW512449.1	Yenamandra,S.P., Koo,C., Chiang,S., Lim,H.S.J., Yeo,Z.Y., Ng,L.C., Hapuarachchi,H.C.	2021-07-09T00:00:00Z	SG(EHI)D2/45975Y16	Dengue virus	Flavivirus	Flaviviridae	ssRNA(+)	10723	GenBank	complete	DENV-2_cosmopolitan	Singapore	Singapore	Homo sapiens	blood	2016	Dengue virus type 2 isolate SG(EHI)D2/45975Y16, complete genome
MW512448.1	Yenamandra,S.P., Koo,C., Chiang,S., Lim,H.S.J., Yeo,Z.Y., Ng,L.C., Hapuarachchi,H.C.	2021-07-09T00:00:00Z	SG(EHI)D2/6406Y15	Dengue virus	Flavivirus	Flaviviridae	ssRNA(+)	10723	GenBank	complete	DENV-2_cosmopolitan	Singapore	Singapore	Homo sapiens	blood	2015	Dengue virus type 2 isolate SG(EHI)D2/6406Y15, complete genome
MW512447.1	Yenamandra,S.P., Koo,C., Chiang,S., Lim,H.S.J., Yeo,Z.Y., Ng,L.C., Hapuarachchi,H.C.	2021-07-09T00:00:00Z	SG(EHI)D2/25169Y15	Dengue virus	Flavivirus	Flaviviridae	ssRNA(+)	10723	GenBank	complete	DENV-2_cosmopolitan	Singapore	Singapore	Homo sapiens	blood	2015	Dengue virus type 2 isolate SG(EHI)D2/25169Y15, complete genome
MW512446.1	Yenamandra,S.P., Koo,C., Chiang,S., Lim,H.S.J., Yeo,Z.Y., Ng,L.C., Hapuarachchi,H.C.	2021-07-09T00:00:00Z	SG(EHI)D2/46338Y15	Dengue virus	Flavivirus	Flaviviridae	ssRNA(+)	10723	GenBank	complete	DENV-2_cosmopolitan	Singapore	Singapore	Homo sapiens	blood	2015	Dengue virus type 2 isolate SG(EHI)D2/46338Y15, complete genome
MW512445.1	Yenamandra,S.P., Koo,C., Chiang,S., Lim,H.S.J., Yeo,Z.Y., Ng,L.C., Hapuarachchi,H.C.	2021-07-09T00:00:00Z	SG(EHI)D2/52797Y15	Dengue virus	Flavivirus	Flaviviridae	ssRNA(+)	10723	GenBank	complete	DENV-2_cosmopolitan	Singapore	Singapore	Homo sapiens	blood	2015	Dengue virus type 2 isolate SG(EHI)D2/52797Y15, complete genome
MW512444.1	Yenamandra,S.P., Koo,C., Chiang,S., Lim,H.S.J., Yeo,Z.Y., Ng,L.C., Hapuarachchi,H.C.	2021-07-09T00:00:00Z	SG(EHI)D2/52507Y15	Dengue virus	Flavivirus	Flaviviridae	ssRNA(+)	10723	GenBank	complete	DENV-2_cosmopolitan	Singapore	Singapore	Homo sapiens	blood	2015	Dengue virus type 2 isolate SG(EHI)D2/52507Y15, complete genome
MW512443.1	Yenamandra,S.P., Koo,C., Chiang,S., Lim,H.S.J., Yeo,Z.Y., Ng,L.C., Hapuarachchi,H.C.	2021-07-09T00:00:00Z	SG(EHI)D2/38380Y15	Dengue virus	Flavivirus	Flaviviridae	ssRNA(+)	10723	GenBank	complete	DENV-2_cosmopolitan	Singapore	Singapore	Homo sapiens	blood	2015	Dengue virus type 2 isolate SG(EHI)D2/38380Y15, complete genome
MW512442.1	Yenamandra,S.P., Koo,C., Chiang,S., Lim,H.S.J., Yeo,Z.Y., Ng,L.C., Hapuarachchi,H.C.	2021-07-09T00:00:00Z	SG(EHI)D2/31764Y15	Dengue virus	Flavivirus	Flaviviridae	ssRNA(+)	10586	GenBank	partial	DENV-2_cosmopolitan	Singapore	Singapore	Homo sapiens	blood	2015	Dengue virus type 2 isolate SG(EHI)D2/31764Y15 polyprotein (POLY) gene, complete cds
MW512441.1	Yenamandra,S.P., Koo,C., Chiang,S., Lim,H.S.J., Yeo,Z.Y., Ng,L.C., Hapuarachchi,H.C.	2021-07-09T00:00:00Z	SG(EHI)D2/47064Y15	Dengue virus	Flavivirus	Flaviviridae	ssRNA(+)	10723	GenBank	complete	DENV-2_cosmopolitan	Singapore	Singapore	Homo sapiens	blood	2015	Dengue virus type 2 isolate SG(EHI)D2/47064Y15, complete genome
MW512440.1	Yenamandra,S.P., Koo,C., Chiang,S., Lim,H.S.J., Yeo,Z.Y., Ng,L.C., Hapuarachchi,H.C.	2021-07-09T00:00:00Z	SG(EHI)D2/42530Y15	Dengue virus	Flavivirus	Flaviviridae	ssRNA(+)	10723	GenBank	complete	DENV-2_cosmopolitan	Singapore	Singapore	Homo sapiens	blood	2015	Dengue virus type 2 isolate SG(EHI)D2/42530Y15, complete genome
MW512439.1	Yenamandra,S.P., Koo,C., Chiang,S., Lim,H.S.J., Yeo,Z.Y., Ng,L.C., Hapuarachchi,H.C.	2021-07-09T00:00:00Z	SG(EHI)D2/52595Y15	Dengue virus	Flavivirus	Flaviviridae	ssRNA(+)	10723	GenBank	complete	DENV-2_cosmopolitan	Singapore	Singapore	Homo sapiens	blood	2015	Dengue virus type 2 isolate SG(EHI)D2/52595Y15, complete genome
MW512438.1	Yenamandra,S.P., Koo,C., Chiang,S., Lim,H.S.J., Yeo,Z.Y., Ng,L.C., Hapuarachchi,H.C.	2021-07-09T00:00:00Z	SG(EHI)D2/9849Y15	Dengue virus	Flavivirus	Flaviviridae	ssRNA(+)	10723	GenBank	complete	DENV-2_cosmopolitan	Singapore	Singapore	Homo sapiens	blood	2015	Dengue virus type 2 isolate SG(EHI)D2/9849Y15, complete genome
MW512437.1	Yenamandra,S.P., Koo,C., Chiang,S., Lim,H.S.J., Yeo,Z.Y., Ng,L.C., Hapuarachchi,H.C.	2021-07-09T00:00:00Z	SG(EHI)D2/1488Y15	Dengue virus	Flavivirus	Flaviviridae	ssRNA(+)	10723	GenBank	complete	DENV-2_cosmopolitan	Singapore	Singapore	Homo sapiens	blood	2015	Dengue virus type 2 isolate SG(EHI)D2/1488Y15, complete genome
MW512436.1	Yenamandra,S.P., Koo,C., Chiang,S., Lim,H.S.J., Yeo,Z.Y., Ng,L.C., Hapuarachchi,H.C.	2021-07-09T00:00:00Z	SG(EHI)D2/6218Y15	Dengue virus	Flavivirus	Flaviviridae	ssRNA(+)	10723	GenBank	complete	DENV-2_cosmopolitan	Singapore	Singapore	Homo sapiens	blood	2015	Dengue virus type 2 isolate SG(EHI)D2/6218Y15, complete genome
MW512435.1	Yenamandra,S.P., Koo,C., Chiang,S., Lim,H.S.J., Yeo,Z.Y., Ng,L.C., Hapuarachchi,H.C.	2021-07-09T00:00:00Z	SG(EHI)D2/23941Y15	Dengue virus	Flavivirus	Flaviviridae	ssRNA(+)	10723	GenBank	complete	DENV-2_cosmopolitan	Singapore	Singapore	Homo sapiens	blood	2015	Dengue virus type 2 isolate SG(EHI)D2/23941Y15, complete genome
MW512434.1	Yenamandra,S.P., Koo,C., Chiang,S., Lim,H.S.J., Yeo,Z.Y., Ng,L.C., Hapuarachchi,H.C.	2021-07-09T00:00:00Z	SG(EHI)D2/47803Y14	Dengue virus	Flavivirus	Flaviviridae	ssRNA(+)	10723	GenBank	complete	DENV-2_cosmopolitan	Singapore	Singapore	Homo sapiens	blood	2014	Dengue virus type 2 isolate SG(EHI)D2/47803Y14, complete genome
MW512433.1	Yenamandra,S.P., Koo,C., Chiang,S., Lim,H.S.J., Yeo,Z.Y., Ng,L.C., Hapuarachchi,H.C.	2021-07-09T00:00:00Z	SG(EHI)D2/5916Y14	Dengue virus	Flavivirus	Flaviviridae	ssRNA(+)	10723	GenBank	complete	DENV-2_cosmopolitan	Singapore	Singapore	Homo sapiens	blood	2014	Dengue virus type 2 isolate SG(EHI)D2/5916Y14, complete genome
MW512432.1	Yenamandra,S.P., Koo,C., Chiang,S., Lim,H.S.J., Yeo,Z.Y., Ng,L.C., Hapuarachchi,H.C.	2021-07-09T00:00:00Z	SG(EHI)D2/31789Y14	Dengue virus	Flavivirus	Flaviviridae	ssRNA(+)	10723	GenBank	complete	DENV-2_cosmopolitan	Singapore	Singapore	Homo sapiens	blood	2014	Dengue virus type 2 isolate SG(EHI)D2/31789Y14, complete genome
MW512431.1	Yenamandra,S.P., Koo,C., Chiang,S., Lim,H.S.J., Yeo,Z.Y., Ng,L.C., Hapuarachchi,H.C.	2021-07-09T00:00:00Z	SG(EHI)D2/49248Y14	Dengue virus	Flavivirus	Flaviviridae	ssRNA(+)	10723	GenBank	complete	DENV-2_cosmopolitan	Singapore	Singapore	Homo sapiens	blood	2014	Dengue virus type 2 isolate SG(EHI)D2/49248Y14, complete genome
MW512430.1	Yenamandra,S.P., Koo,C., Chiang,S., Lim,H.S.J., Yeo,Z.Y., Ng,L.C., Hapuarachchi,H.C.	2021-07-09T00:00:00Z	SG(EHI)D2/16081Y14	Dengue virus	Flavivirus	Flaviviridae	ssRNA(+)	10723	GenBank	complete	DENV-2_cosmopolitan	Singapore	Singapore	Homo sapiens	blood	2014	Dengue virus type 2 isolate SG(EHI)D2/16081Y14, complete genome
MW512429.1	Yenamandra,S.P., Koo,C., Chiang,S., Lim,H.S.J., Yeo,Z.Y., Ng,L.C., Hapuarachchi,H.C.	2021-07-09T00:00:00Z	SG(EHI)D2/2803Y14	Dengue virus	Flavivirus	Flaviviridae	ssRNA(+)	10723	GenBank	complete	DENV-2_cosmopolitan	Singapore	Singapore	Homo sapiens	blood	2014	Dengue virus type 2 isolate SG(EHI)D2/2803Y14, complete genome
MW512428.1	Yenamandra,S.P., Koo,C., Chiang,S., Lim,H.S.J., Yeo,Z.Y., Ng,L.C., Hapuarachchi,H.C.	2021-07-09T00:00:00Z	SG(EHI)D2/2190Y14	Dengue virus	Flavivirus	Flaviviridae	ssRNA(+)	10723	GenBank	complete	DENV-2_cosmopolitan	Singapore	Singapore	Homo sapiens	blood	2014	Dengue virus type 2 isolate SG(EHI)D2/2190Y14, complete genome
MW512427.1	Yenamandra,S.P., Koo,C., Chiang,S., Lim,H.S.J., Yeo,Z.Y., Ng,L.C., Hapuarachchi,H.C.	2021-07-09T00:00:00Z	SG(EHI)D2/1954Y14	Dengue virus	Flavivirus	Flaviviridae	ssRNA(+)	10723	GenBank	complete	DENV-2_cosmopolitan	Singapore	Singapore	Homo sapiens	blood	2014	Dengue virus type 2 isolate SG(EHI)D2/1954Y14, complete genome
MW512426.1	Yenamandra,S.P., Koo,C., Chiang,S., Lim,H.S.J., Yeo,Z.Y., Ng,L.C., Hapuarachchi,H.C.	2021-07-09T00:00:00Z	SG(EHI)D2/44236Y14	Dengue virus	Flavivirus	Flaviviridae	ssRNA(+)	10723	GenBank	complete	DENV-2_cosmopolitan	Singapore	Singapore	Homo sapiens	blood	2014	Dengue virus type 2 isolate SG(EHI)D2/44236Y14, complete genome
MW512425.1	Yenamandra,S.P., Koo,C., Chiang,S., Lim,H.S.J., Yeo,Z.Y., Ng,L.C., Hapuarachchi,H.C.	2021-07-09T00:00:00Z	SG(EHI)D2/23779Y14	Dengue virus	Flavivirus	Flaviviridae	ssRNA(+)	10723	GenBank	complete	DENV-2_cosmopolitan	Singapore	Singapore	Homo sapiens	blood	2014	Dengue virus type 2 isolate SG(EHI)D2/23779Y14, complete genome
MW512424.1	Yenamandra,S.P., Koo,C., Chiang,S., Lim,H.S.J., Yeo,Z.Y., Ng,L.C., Hapuarachchi,H.C.	2021-07-09T00:00:00Z	SG(EHI)D2/40520Y14	Dengue virus	Flavivirus	Flaviviridae	ssRNA(+)	10685	GenBank	partial	DENV-2_cosmopolitan	Singapore	Singapore	Homo sapiens	blood	2014	Dengue virus type 2 isolate SG(EHI)D2/40520Y14 polyprotein (POLY) gene, complete cds
MW512423.1	Yenamandra,S.P., Koo,C., Chiang,S., Lim,H.S.J., Yeo,Z.Y., Ng,L.C., Hapuarachchi,H.C.	2021-07-09T00:00:00Z	SG(EHI)D2/26722Y14	Dengue virus	Flavivirus	Flaviviridae	ssRNA(+)	10723	GenBank	complete	DENV-2_cosmopolitan	Singapore	Singapore	Homo sapiens	blood	2014	Dengue virus type 2 isolate SG(EHI)D2/26722Y14, complete genome
MW512422.1	Yenamandra,S.P., Koo,C., Chiang,S., Lim,H.S.J., Yeo,Z.Y., Ng,L.C., Hapuarachchi,H.C.	2021-07-09T00:00:00Z	SG(EHI)D2/19386Y14	Dengue virus	Flavivirus	Flaviviridae	ssRNA(+)	10723	GenBank	complete	DENV-2_cosmopolitan	Singapore	Singapore	Homo sapiens	blood	2014	Dengue virus type 2 isolate SG(EHI)D2/19386Y14, complete genome
MW512421.1	Yenamandra,S.P., Koo,C., Chiang,S., Lim,H.S.J., Yeo,Z.Y., Ng,L.C., Hapuarachchi,H.C.	2021-07-09T00:00:00Z	SG(EHI)D2/38972Y14	Dengue virus	Flavivirus	Flaviviridae	ssRNA(+)	10723	GenBank	complete	DENV-2_cosmopolitan	Singapore	Singapore	Homo sapiens	blood	2014	Dengue virus type 2 isolate SG(EHI)D2/38972Y14, complete genome
MW512420.1	Yenamandra,S.P., Koo,C., Chiang,S., Lim,H.S.J., Yeo,Z.Y., Ng,L.C., Hapuarachchi,H.C.	2021-07-09T00:00:00Z	SG(EHI)D2/39061Y14	Dengue virus	Flavivirus	Flaviviridae	ssRNA(+)	10723	GenBank	complete	DENV-2_cosmopolitan	Singapore	Singapore	Homo sapiens	blood	2014	Dengue virus type 2 isolate SG(EHI)D2/39061Y14, complete genome
MW512419.1	Yenamandra,S.P., Koo,C., Chiang,S., Lim,H.S.J., Yeo,Z.Y., Ng,L.C., Hapuarachchi,H.C.	2021-07-09T00:00:00Z	SG(EHI)D2/42268Y14	Dengue virus	Flavivirus	Flaviviridae	ssRNA(+)	10612	GenBank	partial	DENV-2_cosmopolitan	Singapore	Singapore	Homo sapiens	blood	2014	Dengue virus type 2 isolate SG(EHI)D2/42268Y14 polyprotein (POLY) gene, complete cds
MW512418.1	Yenamandra,S.P., Koo,C., Chiang,S., Lim,H.S.J., Yeo,Z.Y., Ng,L.C., Hapuarachchi,H.C.	2021-07-09T00:00:00Z	SG(EHI)D2/47001Y14	Dengue virus	Flavivirus	Flaviviridae	ssRNA(+)	10723	GenBank	complete	DENV-2_cosmopolitan	Singapore	Singapore	Homo sapiens	blood	2014	Dengue virus type 2 isolate SG(EHI)D2/47001Y14, complete genome
MW512417.1	Yenamandra,S.P., Koo,C., Chiang,S., Lim,H.S.J., Yeo,Z.Y., Ng,L.C., Hapuarachchi,H.C.	2021-07-09T00:00:00Z	SG(EHI)D2/47312Y14	Dengue virus	Flavivirus	Flaviviridae	ssRNA(+)	10723	GenBank	complete	DENV-2_cosmopolitan	Singapore	Singapore	Homo sapiens	blood	2014	Dengue virus type 2 isolate SG(EHI)D2/47312Y14, complete genome
MW512416.1	Yenamandra,S.P., Koo,C., Chiang,S., Lim,H.S.J., Yeo,Z.Y., Ng,L.C., Hapuarachchi,H.C.	2021-07-09T00:00:00Z	SG(EHI)D2/7537Y14	Dengue virus	Flavivirus	Flaviviridae	ssRNA(+)	10695	GenBank	partial	DENV-2_cosmopolitan	Singapore	Singapore	Homo sapiens	blood	2014	Dengue virus type 2 isolate SG(EHI)D2/7537Y14 polyprotein (POLY) gene, complete cds
MW512415.1	Yenamandra,S.P., Koo,C., Chiang,S., Lim,H.S.J., Yeo,Z.Y., Ng,L.C., Hapuarachchi,H.C.	2021-07-09T00:00:00Z	SG(EHI)D2/3278Y14	Dengue virus	Flavivirus	Flaviviridae	ssRNA(+)	10723	GenBank	complete	DENV-2_cosmopolitan	Singapore	Singapore	Homo sapiens	blood	2014	Dengue virus type 2 isolate SG(EHI)D2/3278Y14, complete genome
MW512414.1	Yenamandra,S.P., Koo,C., Chiang,S., Lim,H.S.J., Yeo,Z.Y., Ng,L.C., Hapuarachchi,H.C.	2021-07-09T00:00:00Z	SG(EHI)D2/47654Y14	Dengue virus	Flavivirus	Flaviviridae	ssRNA(+)	10723	GenBank	complete	DENV-2_cosmopolitan	Singapore	Singapore	Homo sapiens	blood	2014	Dengue virus type 2 isolate SG(EHI)D2/47654Y14, complete genome
MW512413.1	Yenamandra,S.P., Koo,C., Chiang,S., Lim,H.S.J., Yeo,Z.Y., Ng,L.C., Hapuarachchi,H.C.	2021-07-09T00:00:00Z	SG(EHI)D2/33428Y14	Dengue virus	Flavivirus	Flaviviridae	ssRNA(+)	10723	GenBank	complete	DENV-2_cosmopolitan	Singapore	Singapore	Homo sapiens	blood	2014	Dengue virus type 2 isolate SG(EHI)D2/33428Y14, complete genome
MW512412.1	Yenamandra,S.P., Koo,C., Chiang,S., Lim,H.S.J., Yeo,Z.Y., Ng,L.C., Hapuarachchi,H.C.	2021-07-09T00:00:00Z	SG(EHI)D2/17554Y14	Dengue virus	Flavivirus	Flaviviridae	ssRNA(+)	10723	GenBank	complete	DENV-2_cosmopolitan	Singapore	Singapore	Homo sapiens	blood	2014	Dengue virus type 2 isolate SG(EHI)D2/17554Y14, complete genome
MW512411.1	Yenamandra,S.P., Koo,C., Chiang,S., Lim,H.S.J., Yeo,Z.Y., Ng,L.C., Hapuarachchi,H.C.	2021-07-09T00:00:00Z	SG(EHI)D2/38070Y14	Dengue virus	Flavivirus	Flaviviridae	ssRNA(+)	10723	GenBank	complete	DENV-2_cosmopolitan	Singapore	Singapore	Homo sapiens	blood	2014	Dengue virus type 2 isolate SG(EHI)D2/38070Y14, complete genome
MW512410.1	Yenamandra,S.P., Koo,C., Chiang,S., Lim,H.S.J., Yeo,Z.Y., Ng,L.C., Hapuarachchi,H.C.	2021-07-09T00:00:00Z	SG(EHI)D2/53583Y14	Dengue virus	Flavivirus	Flaviviridae	ssRNA(+)	10723	GenBank	complete	DENV-2_cosmopolitan	Singapore	Singapore	Homo sapiens	blood	2014	Dengue virus type 2 isolate SG(EHI)D2/53583Y14, complete genome
[truncated: 2,367 more rows]
