# Supplementary material for: Circulation of Dengue Virus Serotype 1 genotype V and Dengue Virus Serotype 2 genotype III in Tocantins State, Northern Brazil, 2021-2022
Source: Preprints.org preprint supplement (doi:10.20944/preprints202309.1376.v1), 2023-09-20
Supplement: Supplementary file 5 [file Table S3.xlsx]

## Sheet: Table S3
Table S3 - DENV-1 sequences clades I to III Obtained from GenBank.
Accession	Date	Location	Clade
KY474303	2014-01-01	Ecuador	I
KY474307	2014-01-01	Ecuador	I
MN449013	2014-04-16	Ecuador	I
MF797878	2014-02-17	Ecuador	I
MN449008	2015-05-07	Ecuador	I
MN449016	2015-04-08	Ecuador	I
MN449007	2015-06-10	Ecuador	I
MN449012	2015-05-12	Ecuador	I
MN449009	2015-04-16	Ecuador	I
MH450312	2015-10-19	Venezuela	I
MN449014	2015-04-20	Ecuador	I
MN449015	2015-05-20	Ecuador	I
MN449011	2015-04-22	Ecuador	I
MN449010	2015-07-30	Ecuador	I
MZ773407	2019-09-01	Colombia	I
OQ821336	2019-10-02	Cuba	I
OQ821337	2019-10-04	Cuba	I
OQ821366	2019-12-05	Mexico	I
OQ821334	2019-08-18	Cuba	I
OQ821333	2019-07-26	Cuba	I
MT899083	2019-09-29	Mexico	I
OQ821338	2020-01-10	Cuba	I
OQ821365	2020-12-18	Cuba	I
MZ945530	2020-11-18	USA	I
OQ821339	2020-11-25	Cuba	I
ON123568	2021-03-01	Peru	I
ON123579	2021-09-03	Peru	I
ON123585	2021-05-07	Peru	I
ON123586	2021-05-07	Peru	I
ON123593	2021-09-07	Peru	I
ON426317	2021-05-08	São Paulo	I
ON123571	2021-03-08	Peru	I
ON123601	2021-09-08	Peru	I
ON123563	2021-02-09	Peru	I
ON123576	2021-08-10	Peru	I
ON123580	2021-09-10	Peru	I
ON123581	2021-09-10	Peru	I
ON123589	2021-07-13	Peru	I
ON123564	2021-02-15	Peru	I
ON123573	2021-03-16	Peru	I
ON123590	2021-07-16	Peru	I
ON123591	2021-07-16	Peru	I
ON123602	2021-09-17	Peru	I
ON123603	2021-09-17	Peru	I
ON123604	2021-09-18	Peru	I
ON123595	2021-08-19	Peru	I
ON123592	2021-08-20	Peru	I
ON123594	2021-05-20	Peru	I
ON123577	2021-08-23	Peru	I
ON123582	2021-07-23	Peru	I
ON123597	2021-08-23	Peru	I
OM654347	2021-01-25	Colombia	I
OM654348	2021-01-25	Colombia	I
ON123578	2021-08-27	Peru	I
ON123598	2021-08-27	Peru	I
ON123599	2021-08-28	Peru	I
ON123600	2021-08-30	Peru	I
OQ821349	2022-09-01	Cuba	I
ON632110	2022-04-01	São Paulo	I
OQ821347	2022-08-02	Cuba	I
OQ821351	2022-12-03	Cuba	I
OQ821352	2022-12-07	Cuba	I
ON632069	2022-04-08	São Paulo	I
ON632040	2022-04-12	Amazonas	I
OQ821346	2022-07-14	Cuba	I
OQ821342	2022-05-16	Cuba	I
OQ821343	2022-06-17	Cuba	I
OQ821350	2022-09-19	Cuba	I
OQ445881	2022-07-19	USA	I
OQ821344	2022-06-23	Cuba	I
OQ821341	2022-04-24	Cuba	I
ON426342	2022-02-25	São Paulo	I
OQ821348	2022-08-28	Cuba	I
ON632060	2022-03-28	São Paulo	I
TO-UFT-122956	2021-12-02	Tocantins	I
TO-UFT-92972	2021-12-06	Tocantins	I
KF955407	2005-01-01	Venezuela	II
JN819411	2005-01-01	Venezuela	II
JN819412	2005-01-01	Venezuela	II
KF955413	2006-01-01	Venezuela	II
HQ332177	2006-01-01	Venezuela	II
HQ332180	2006-01-01	Venezuela	II
JN819405	2006-01-01	Venezuela	II
JN819413	2006-01-01	Venezuela	II
HQ332179	2007-01-01	Venezuela	II
JN819414	2007-01-01	Venezuela	II
KC692517	2010-12-29	Argentina	II
KU509254	2011-01-01	Venezuela	II
MW377910	2014-10-01	Amapá	II
KY474305	2014-01-01	Ecuador	II
KY474306	2014-01-01	Ecuador	II
MW377900	2014-10-24	Amapá	II
MT929529	2015-08-05	Goiás	II
MT929528	2015-11-06	Goiás	II
MW377906	2015-07-10	Amapá	II
MW377904	2015-06-19	Amapá	II
MW377901	2015-02-23	Amapá	II
MW377907	2015-02-23	Amapá	II
MW377908	2015-02-25	Amapá	II
MW377909	2015-02-27	Amapá	II
MW377905	2015-05-29	Amapá	II
MT929584	2016-02-20	São Paulo	II
MT929577	2017-03-21	Minas Gerais	II
MT929544	2019-02-06	Bahia	II
MT929545	2019-05-07	Bahia	II
MT929541	2019-04-08	Bahia	II
MT929543	2019-01-09	Bahia	II
MT929559	2019-04-09	Goiás	II
MT862860	2019-05-13	Alagoas	II
MT929548	2019-05-14	Bahia	II
MT929539	2019-01-15	Bahia	II
MT929530	2019-01-16	Bahia	II
MT929540	2019-05-16	Bahia	II
MT929546	2019-05-16	Bahia	II
MT929531	2019-01-17	Bahia	II
MT929532	2019-01-17	Bahia	II
MT929534	2019-01-17	Bahia	II
MT929535	2019-01-17	Bahia	II
MT929537	2019-01-17	Bahia	II
MT929533	2019-01-18	Bahia	II
MT929536	2019-01-18	Bahia	II
MT929569	2019-07-18	Pernambuco	II
MT929538	2019-01-21	Bahia	II
MT929568	2019-06-22	Pernambuco	II
MT929575	2019-03-22	Pernambuco	II
MT929542	2019-04-25	Bahia	II
MT929547	2019-03-27	Bahia	II
ON426356	2021-04-07	São Paulo	II
ON426305	2021-03-26	São Paulo	II
ON632048	2022-04-03	São Paulo	II
ON632090	2022-03-25	São Paulo	II
TO-UFT-232930	2021-11-22	Tocantins	II
TO-UFT-12931	2021-11-23	Tocantins	II
TO-UFT-62929	2021-11-24	Tocantins	II
TO-UFT-82956	2021-11-25	Tocantins	II
UFT-TO-132929	2021-11-25	Tocantins	II
TO-UFT-122971	2021-11-26	Tocantins	II
TO-UFT-232957	2021-11-29	Tocantins	II
TO-UFT-38522	2022-01-23	Tocantins	II
GU056031	1998-12-31	Venezuela	III
JN819410	2005-01-01	Venezuela	III
FJ810415	2005-01-01	Venezuela	III
GU131838	2006-01-01	Venezuela	III
FJ639815	2006-01-01	Venezuela	III
GQ199877	2007-01-01	Venezuela	III
FJ873810	2007-01-01	Venezuela	III
EU482611	2007-01-01	Venezuela	III
EU482610	2007-01-31	Venezuela	III
GU131841	2007-03-10	Venezuela	III
FJ850102	2007-03-30	Venezuela	III
GU131840	2007-05-30	Venezuela	III
KF955441	2007-12-31	Venezuela	III
FJ850103	2008-01-01	Venezuela	III
KC692495	2009-02-03	Argentina	III
KC692496	2009-02-19	Argentina	III
KC692497	2009-03-02	Argentina	III
KC692498	2009-03-03	Argentina	III
KC692499	2009-03-31	Argentina	III
KC692500	2009-04-01	Argentina	III
KC692501	2009-04-06	Argentina	III
KC692502	2009-04-09	Argentina	III
KC692503	2009-04-14	Argentina	III
KC692504	2009-04-16	Argentina	III
KC692505	2009-04-16	Argentina	III
KC692506	2009-04-22	Argentina	III
KC692507	2009-04-23	Argentina	III
KC692508	2009-04-24	Argentina	III
KC692509	2009-05-05	Argentina	III
KC692510	2009-05-28	Argentina	III
MW946053	2010-01-01	Bolivia	III
JX669466	2010-01-01	Pernambuco	III
KC692512	2010-02-17	Argentina	III
JX669463	2010-03-19	Pernambuco	III
KC692514	2010-05-03	Argentina	III
KC692515	2010-05-14	Argentina	III
JX669462	2010-10-06	Pernambuco	III
KF672760	2011-01-01	Rio de Janeiro	III
KP188540	2011-05-03	São Paulo	III
KP188541	2011-05-24	São Paulo	III
KP188542	2011-06-08	São Paulo	III
MT929581	2016-01-19	São Paulo	III
MT929549	2016-02-13	Minas Gerais	III
MT862895	2018-04-20	Paraiba	III
MT862862	2018-04-21	Paraiba	III
MT862889	2018-04-21	Paraiba	III
MT862893	2018-04-21	Paraiba	III
MT862890	2018-04-22	Paraiba	III
MT862894	2018-04-22	Paraiba	III
MT862883	2018-04-23	Paraiba	III
MT862884	2018-05-04	Paraiba	III
MT862886	2018-05-04	Paraiba	III
MT862892	2018-05-07	Paraiba	III
MT862885	2018-05-09	Paraiba	III
MT862864	2018-05-13	Paraiba	III
MT862875	2018-05-13	Paraiba	III
MT862879	2018-05-18	Paraiba	III
MT862871	2018-05-26	Paraiba	III
MT862881	2018-05-26	Paraiba	III
MT862880	2018-05-27	Paraiba	III
MT862888	2018-06-03	Paraiba	III
MT862874	2018-06-07	Paraiba	III
MT862856	2018-06-10	Paraiba	III
MT862877	2018-06-16	Paraiba	III
MT862863	2018-06-17	Paraiba	III
MT862872	2018-06-20	Paraiba	III
MT929560	2019-02-13	Goiás	III
MT929562	2019-02-21	Goiás	III
MT929556	2019-03-07	Goiás	III
MT862855	2019-03-25	Paraiba	III
MT929558	2019-04-02	Goiás	III
MT929557	2019-04-03	Goiás	III
MT862870	2019-05-06	Paraiba	III
MT929566	2019-05-28	Pernambuco	III
MT929572	2019-05-29	Pernambuco	III
MT862865	2019-05-29	Paraiba	III
MT929567	2019-06-18	Pernambuco	III
MT929574	2019-07-18	Goiás	III
MT929570	2019-07-24	Pernambuco	III
ON426325	2020-02-25	São Paulo	III
ON426295	2021-02-18	São Paulo	III
ON426298	2021-03-15	São Paulo	III
ON426329	2021-03-15	São Paulo	III
ON426349	2021-03-16	São Paulo	III
ON426302	2021-03-24	São Paulo	III
ON426332	2021-04-09	São Paulo	III
ON426310	2021-04-13	São Paulo	III
ON426355	2021-04-13	São Paulo	III
ON426311	2021-04-19	São Paulo	III
ON426261	2021-04-26	São Paulo	III
ON426314	2021-04-27	São Paulo	III
ON426321	2021-05-12	São Paulo	III
ON426335	2021-05-17	São Paulo	III
ON426267	2021-05-26	São Paulo	III
ON426263	2021-06-01	São Paulo	III
ON426341	2022-02-15	São Paulo	III
ON426288	2022-02-17	São Paulo	III
ON426340	2022-02-18	São Paulo	III
ON426274	2022-02-21	São Paulo	III
ON426277	2022-02-22	São Paulo	III
ON426285	2022-02-23	São Paulo	III
ON426287	2022-03-04	São Paulo	III
ON426281	2022-03-07	São Paulo	III
ON632084	2022-03-14	São Paulo	III
ON632086	2022-03-25	São Paulo	III
ON632049	2022-03-27	São Paulo	III
ON632045	2022-03-28	São Paulo	III
ON632055	2022-03-29	São Paulo	III
ON632096	2022-04-01	São Paulo	III
ON632105	2022-04-02	São Paulo	III
ON632112	2022-04-02	São Paulo	III
ON632057	2022-04-04	São Paulo	III
ON632101	2022-04-04	São Paulo	III
ON632104	2022-04-04	São Paulo	III
ON632106	2022-04-04	São Paulo	III
ON632100	2022-04-05	São Paulo	III
ON632067	2022-04-09	São Paulo	III
ON632107	2022-04-09	São Paulo	III
ON632071	2022-04-11	São Paulo	III
ON632068	2022-04-13	São Paulo	III
ON632118	2022-04-14	São Paulo	III
ON632078	2022-04-18	São Paulo	III
ON632117	2022-04-18	São Paulo	III
OQ445880	2022-05-18	USA	III
TO-UFT-4017	2022-06-19	Tocantins	III
TO-UFT-417	2022-06-24	Tocantins	III
TO-UFT-717	2022-06-28	Tocantins	III
TO-UFT-4547	2022-07-25	Tocantins	III
TO-UFT-92930	2021-11-22	Tocantins	III
TO-UFT-122930	2021-11-22	Tocantins	III
TO-UFT-82929	2021-11-23	Tocantins	III
TO-UFT-32929	2021-11-24	Tocantins	III
UFT-TO-172929	2021-11-24	Tocantins	III
TO-UFT-72940	2021-11-25	Tocantins	III
UFT-TO-182929	2021-11-25	Tocantins	III
TO-UFT-192971	2021-11-26	Tocantins	III
TO-UFT-32957	2021-11-28	Tocantins	III
TO-UFT-22930	2021-11-29	Tocantins	III
TO-UFT-42930	2021-11-29	Tocantins	III
TO-UFT-52930	2021-11-29	Tocantins	III
TO-UFT-62930	2021-11-29	Tocantins	III
TO-UFT-62931	2021-11-29	Tocantins	III
UFT-TO-242929	2021-11-29	Tocantins	III
TO-UFT-112931	2021-11-30	Tocantins	III
TO-UFT-152931	2021-11-30	Tocantins	III
TO-UFT-92940	2021-12-01	Tocantins	III
TO-UFT-42956	2021-12-02	Tocantins	III
TO-UFT-142956	2021-12-02	Tocantins	III
TO-UFT-152956	2021-12-02	Tocantins	III
TO-UFT-162956	2021-12-02	Tocantins	III
TO-UFT-42972	2021-12-06	Tocantins	III
TO-UFT-72972	2021-12-06	Tocantins	III
TO-UFT-82972	2021-12-06	Tocantins	III
TO-UFT-102972	2021-12-06	Tocantins	III
TO-UFT-112972	2021-12-06	Tocantins	III
TO-UFT-122972	2021-12-06	Tocantins	III
TO-UFT-92979	2021-12-08	Tocantins	III
TO-UFT-122979	2021-12-08	Tocantins	III
TO-UFT-172979	2021-12-08	Tocantins	III
TO-UFT-242979	2021-12-08	Tocantins	III
TO-UFT-80529	2022-02-08	Tocantins	III
TO-UFT-87522	2022-02-10	Tocantins	III
TO-UFT-38606	2022-03-04	Tocantins	III
TO-UFT-18606	2022-03-10	Tocantins	III
TO-UFT-22606	2022-03-11	Tocantins	III
TO-UFT-24606	2022-03-14	Tocantins	III
TO-UFT-8606	2022-03-15	Tocantins	III
TO-UFT-90606	2022-03-20	Tocantins	III
TO-UFT-93606	2022-03-21	Tocantins	III
UFT-TO-94606	2022-03-21	Tocantins	III
