# Supplementary material for: Circulation of Dengue Virus Serotype 1 genotype V and Dengue Virus Serotype 2 genotype III in Tocantins State, Northern Brazil, 2021-2022
Source: Preprints.org preprint supplement (doi:10.20944/preprints202309.1376.v1), 2023-09-20
Supplement: Supplementary file 6 [file Table S4.xlsx]

## Sheet: Table S4
Table S4 - DENV-2 sequences clades I Obtained from GenBank.
Accession	Date	Location	Clade
MT929721.1	2018-03-02	Minas Gerais	I
MT929738.1	2018-11-06	Goiás	I
MT929708.1	2019-03-01	Goiás	I
MW577829.1	2019-04-02	Minas Gerais	I
MW577812.1	2019-05-02	Minas Gerais	I
MW577828.1	2019-05-03	Minas Gerais	I
MW577814.1	2019-04-04	Minas Gerais	I
MW208062.1	2019-04-05	São Paulo	I
MT929686.1	2019-04-06	Minas Gerais	I
MT929617.1	2019-03-06	Mato Grosso do Sul	I
MT929701.1	2019-02-07	Goiás	I
MT929648.1	2019-02-07	Minas Gerais	I
MW577839.1	2019-05-08	Minas Gerais	I
MT929655.1	2019-05-09	Minas Gerais	I
MT929652.1	2019-04-10	Minas Gerais	I
MT929641.1	2019-02-11	Mato Grosso do Sul	I
MT929748.1	2019-05-14	Goiás	I
MT929736.1	2019-05-14	Bahia	I
MT929603.1	2019-03-14	Mato Grosso do Sul	I
MT929642.1	2019-03-15	Mato Grosso do Sul	I
MT929742.1	2019-06-17	Goiás	I
MT929618.1	2019-03-17	Mato Grosso do Sul	I
MT929707.1	2019-02-18	Goiás	I
MT929649.1	2019-03-18	Minas Gerais	I
MT929637.1	2019-03-18	Mato Grosso do Sul	I
MW577836.1	2019-03-19	Minas Gerais	I
MT929636.1	2019-03-19	Mato Grosso do Sul	I
MT929606.1	2019-03-19	Mato Grosso do Sul	I
MW577824.1	2019-05-20	Rio de Janeiro	I
MW577823.1	2019-05-20	Rio de Janeiro	I
MT929591.1	2019-02-20	Mato Grosso do Sul	I
MT929673.1	2019-03-21	Minas Gerais	I
MW577821.1	2019-02-22	Rio de Janeiro	I
MT929740.1	2019-02-23	Goiás	I
MW577827.1	2019-04-25	Minas Gerais	I
MW208048.1	2019-01-25	São Paulo	I
MT929750.1	2019-06-27	Pernambuco	I
MT929622.1	2019-01-27	Mato Grosso do Sul	I
MW577809.1	2019-04-28	Minas Gerais	I
MN959471.1	2019-04-28	São Paulo	I
MT929675.1	2019-03-29	Minas Gerais	I
MT929647.1	2019-04-29	Goiás	I
ON634703.1	2020-01-18	São Paulo	I
ON634714.1	2020-03-19	São Paulo	I
TO-UFT-2201	2021-06-01	Tocantins	I
TO-UFT-2200	2021-06-01	Tocantins	I
ON634725.1	2021-03-02	São Paulo	I
ON634737.1	2021-05-04	São Paulo	I
ON634719.1	2021-02-04	São Paulo	I
ON634739.1	2021-05-07	São Paulo	I
ON634722.1	2021-02-20	São Paulo	I
ON634701.1	2021-05-28	São Paulo	I
ON634736.1	2021-04-30	São Paulo	I
ON634747.1	2022-04-11	São Paulo	I
ON634748.1	2022-04-13	São Paulo	I
ON634751.1	2022-04-14	São Paulo	I
ON634752.1	2022-03-17	São Paulo	I
ON634746.1	2022-03-25	São Paulo	I
ON634741.1	2022-04-25	São Paulo	I
ON634754.1	2022-03-26	São Paulo	I
ON634740.1	2022-03-28	São Paulo	I
TO-UFT-6960	2021-12-08	Tocantins	I
TO-UFT-689	2021-12-22	Tocantins	I
