# Supplementary material for: Circulation of Dengue Virus Serotype 1 genotype V and Dengue Virus Serotype 2 genotype III in Tocantins State, Northern Brazil, 2021-2022
Source: Preprints.org preprint supplement (doi:10.20944/preprints202309.1376.v1), 2023-09-20
Supplement: Supplementary file 7 [file Table S5.xlsx]

## Sheet: Table S5
Table S5: Model comparison of strict molecular clock. uncorrelated relaxed clock and demographic growth models through path sampling (PS) and stepping stone (SS) methods. Blue numbers indicate the best fitting model.
DENV-1 - Clade I
	Uncorrelated relaxed clock		Strict clock
Demographic growth model	PS	SS	PS	SS
Bayesian SkyGrid	-22322.46	-22323.16	-22328.44	-22328.02
Bayesian Skyline	-22316.08	-22317.31	-22325.60	-22327.29
DENV-1 - Clade II
	Uncorrelated relaxed clock		Strict clock
Demographic growth model	PS	SS	PS	SS
Bayesian SkyGrid	-24033.28	-24033.52	-24082.27	-24082.21
Bayesian Skyline	-24027.07	-24027.67	-24075.55	-24075.54
DENV-1 - Clade III
	Uncorrelated relaxed clock		Strict clock
Demographic growth model	PS	SS	PS	SS
Bayesian SkyGrid	-31654.02	-31652.62	-31686.85	-31692.02
Bayesian Skyline	-31647.54	-31649.23	-31682.65	-31684.42
DENV-2 - Clade I
	Uncorrelated relaxed clock		Strict clock
Demographic growth model	PS	SS	PS	SS
Bayesian SkyGrid	-21210.56	-21210.75	-21231.76	-21231.74
Bayesian Skyline	-21194.90	-21195.49	-21212.47	-21212.77
