# Supplementary material for: Circulation of Dengue Virus Serotype 1 genotype V and Dengue Virus Serotype 2 genotype III in Tocantins State, Northern Brazil, 2021-2022
Source: Preprints.org preprint supplement (doi:10.20944/preprints202309.1376.v1), 2023-09-20
Supplement: Supplementary file 8 [file Table S6.xlsx]

## Sheet: Table S6
Table S6: Summary of data of patients from which DENV-1 genomes were recovered, Cts and coverage of the RT-qPCR of samples sequenced in this study.
Id of Sample	Accession	Ct*	Coverage	Depth of Coverage	Host	Location	Date of Collection	Sex**	Age
TO-UFT-80529	OR518259	14	86.5	557.3	Human	Aguiarnópolis	2022-08-02	M	11
TO-UFT-132929	OR518217	19.2	98.3	2616.6	Human	Araguaína	25/11/2021	M	12
TO-UFT-62929	OR518223	16.3	98.2	2846.9	Human	Araguaína	24/11/2021	F	22
TO-UFT-38606	OR518261	20	97.5	1188.9	Human	Colinas do Tocantins	2022-04-03	M	11
TO-UFT-172929	OR518216	19.7	98.7	2771.6	Human	Darcinópolis	24/11/2021	M	68
TO-UFT-4547	OR518272	18.5	93.4	2302	Human	Dianópolis	25/07/2022	F	40
TO-UFT-12931	OR518225	18.2	98.5	1705.1	Human	Dueré	23/11/2021	M	81
TO-UFT-82956	OR518221	17.4	91.3	1469.8	Human	Dueré	25/11/2021	F	39
TO-UFT-93606	OR518267	17.8	97.4	1455.6	Human	Itaporã do Tocantins	21/03/2022	F	14
TO-UFT-94606	OR518268	18.9	97.3	1357.6	Human	Itaporã do Tocantins	21/03/2022	M	58
TO-UFT-32929	OR518224	20.4	98.7	2604.1	Human	Nazaré	24/11/2021	F	22
TO-UFT-122930	OR518219	18.2	88.7	579.6	Human	Palmas	22/11/2021	F	41
TO-UFT-122971	OR518228	19.4	89.5	747.3	Human	Palmas	26/11/2021	F	34
TO-UFT-182929	OR518226	16.6	98.8	2800.1	Human	Palmas	25/11/2021	M	43
TO-UFT-192971	OR518229	18.5	93.5	784	Human	Palmas	26/11/2021	M	21
TO-UFT-232930	OR518218	18.1	94.3	1023.1	Human	Palmas	22/11/2021	M	13
TO-UFT-242929	OR518231	21.3	89.8	1171.8	Human	Palmas	29/11/2021	F	23
TO-UFT-32957	OR518230	15.3	97.8	1667.7	Human	Palmas	28/11/2021	F	20
TO-UFT-38522	OR518258	17.6	70.1	638.9	Human	Palmas	23/01/2022	F	42
TO-UFT-42956	OR518241	16.3	98.4	1077.9	Human	Palmas	2021-02-12	F	30
TO-UFT-53522	OR518257	20.2	80.2	460	Human	Palmas	17/01/2022	M	9
TO-UFT-72940	OR518227	14.9	98.5	1710.4	Human	Palmas	25/11/2021	M	20
TO-UFT-90606	OR518266	17.9	98.3	1530.4	Human	Palmas	20/03/2022	F	4
TO-UFT-92930	OR518220	17.4	95.5	851.5	Human	Palmas	22/11/2021	M	6
TO-UFT-102972	OR518246	16.3	97.4	1758.4	Human	Porto Nacional	2021-06-12	F	46
TO-UFT-112931	OR518238	14.2	97.7	1330.2	Human	Porto Nacional	30/11/2021	F	67
TO-UFT-112972	OR518247	18	93.3	821.7	Human	Porto Nacional	2021-06-12	F	25
TO-UFT-122956	OR518242	19.5	92.2	1074.8	Human	Porto Nacional	2021-02-12	F	39
TO-UFT-122972	OR518248	12.3	97.4	2713.9	Human	Porto Nacional	2021-06-12	M	82
TO-UFT-122979	OR518253	16.5	94.1	913.8	Human	Porto Nacional	2021-08-12	M	21
TO-UFT-142956	OR518243	14.5	97.7	1246.8	Human	Porto Nacional	2021-02-12	F	72
TO-UFT-152931	OR518239	12.1	97.4	2470.7	Human	Porto Nacional	30/11/2021	M	58
TO-UFT-152956	OR518244	16.3	97.3	1068.8	Human	Porto Nacional	2021-02-12	M	7
TO-UFT-162956	OR518245	19.7	89.5	484.4	Human	Porto Nacional	2021-02-12	F	38
TO-UFT-172979	OR518254	15	98.6	1461.8	Human	Porto Nacional	2021-08-12	M	39
TO-UFT-22930	OR518232	18.1	98.6	2053.7	Human	Porto Nacional	29/11/2021	M	56
TO-UFT-242979	OR518255	21.3	80.8	286.2	Human	Porto Nacional	2021-08-12	M	22
TO-UFT-42930	OR518233	17.1	97.3	724.1	Human	Porto Nacional	29/11/2021	M	15
TO-UFT-42972	OR518249	19.1	98.5	578.2	Human	Porto Nacional	2021-06-12	M	17
TO-UFT-52930	OR518234	16.7	98.7	1155.1	Human	Porto Nacional	29/11/2021	M	80
TO-UFT-62930	OR518235	18.7	90.2	534.5	Human	Porto Nacional	29/11/2021	M	18
TO-UFT-72972	OR518250	18.2	97.8	950.6	Human	Porto Nacional	2021-06-12	F	63
TO-UFT-82972	OR518251	18.6	98	2113.5	Human	Porto Nacional	2021-06-12	F	27
TO-UFT-92940	OR518240	19.7	88.5	418.4	Human	Porto Nacional	2021-01-12	M	26
TO-UFT-92972	OR518252	18.2	98.6	1627.7	Human	Porto Nacional	2021-06-12	F	12
TO-UFT-92979	OR518256	16.4	99.1	1164.4	Human	Porto Nacional	2021-08-12	M	17
TO-UFT-62931	OR518236	18.8	98.3	685.2	Human	Rio dos Bois	29/11/2021	F	38
TO-UFT-87522	OR518260	17	82.2	510.8	Human	Rio dos Bois	2022-10-02	F	59
TO-UFT-8606	OR518265	21.2	94.4	1095	Human	São Bento do Tocantins	15/03/2022	F	26
TO-UFT-417	OR518270	23.1	84.2	1401	Human	Tocantínia	24/06/2022	M	9
TO-UFT-717	OR518271	21.3	91.7	1541.1	Human	Tocantínia	28/06/2022	F	49
TO-UFT-18606	OR518262	18.6	97.7	1655.2	Human	Tocantinópolis	2022-10-03	M	13
TO-UFT-22606	OR518263	18.4	97.4	1659.2	Human	Tocantinópolis	2022-11-03	F	25
TO-UFT-24606	OR518264	18.7	97.3	1659.4	Human	Tocantinópolis	14/03/2022	M	9
TO-UFT-4017	OR518269	14.2	98.2	471.1	Human	Tocantinópolis	19/06/2022	M	20
TO-UFT-82929	OR518222	17.6	98.2	2091.5	Human	Tocantinópolis	23/11/2021	M	23
TO-UFT-232957	OR518237	19.1	90.1	760.9	Human	Wanderlândia	29/11/2021	F	48
*Ct = Cycle Threshold.
**M = Male; F = Female.
