# Supplementary material for: Circulation of Dengue Virus Serotype 1 genotype V and Dengue Virus Serotype 2 genotype III in Tocantins State, Northern Brazil, 2021-2022
Source: Preprints.org preprint supplement (doi:10.20944/preprints202309.1376.v1), 2023-09-20
Supplement: Supplementary file 9 [file Table S7.xlsx]

## Sheet: Table S7
Table S7: Summary of data of patients from which DENV-2 genomes were recovered, Cts and coverage of the RT-qPCR of samples sequenced in this study.
Id of Sample	Accession	Ct*	Coverage	Depth of Coverage	Host	Location	Date of Collection	Sex**	Age
TO-UFT-2200	OR486033	21.5	90.7	1867.4	Human	Araguaína	2021-01-06	M	11
TO-UFT-2201	OR486034	22.2	91.1	1695.4	Human	Araguaína	2021-01-06	F	42
TO-UFT-689	OR486032	19.2	91.3	2485.5	Human	Bandeirantes do Tocantins	22/12/2021	F	14
TO-UFT-6960	OR486035	23.5	89.8	1402.7	Human	Colinas do Tocantins	2021-08-12	F	38
*Ct = Cycle Threshold.
**M = Male; F = Female.
