# Supplementary material for: Circulation of Dengue Virus Serotype 1 genotype V and Dengue Virus Serotype 2 genotype III in Tocantins State, Northern Brazil, 2021-2022
Source: Preprints.org preprint supplement (doi:10.20944/preprints202309.1376.v1), 2023-09-20
Supplement: Supplementary file 10 [file Table S8.xlsx]

## Sheet: Table S8
Table S8 - Missense mutations found in the newly sequenced genomes of DENV-1 from Tocantins reported in this study.
Protein	anchored capsid protein				protein pr				membrane glycoprotein			envelope protein E												NS1														NS2A
Sites (Protein)	4	45	70	100	13	29	31	89	22	31	34	10	31	32	36	157	162	230	339	369	394	454	480	60	128	131	146	162	217	224	227	242	247	264	278	288	324	12	18	24	28	74	111	114	118	139	142	155	168
JQ922544.1	His	Thr	Ser	Arg	Ile	Ala	Val	Asp	Cys	Lys	Ile	Glu	Leu	His	Gln	Thr	Ala	Thr	Thr	Ala	Lys	Ile	Ile	Ala	Ile	Thr	Asp	Ile	Phe	Ile	Lys	Ile	Tyr	Thr	Asp	Glu	Lys	Leu	Met	Arg	Ser	Tyr	Val	Val	Asn	Asp	Ser	Ile	Met
TO-UFT-122930	Gln	Lys	-	-	-	-	-	Glu	Ser	Arg	Thr	Asp	Val	Thr	Lys	Glu	-	-	-	Thr	Arg	Thr	Val	-	-	-	Gly	-	-	Thr	Arg	-	Phe	-	-	Asp	Arg	Ile	-	Lys	Asn	-	-	-	-	Glu	Pro	Val	Thr
TO-UFT-232930	Gln	Lys	-	Lys	-	Val	-	-	Ser	Arg	Thr	Asp	Val	Thr	Lys	Glu	-	-	-	Thr	-	Thr	-	-	-	Ala	Gly	-	-	Thr	-	Val	-	Ile	Gly	Asp	Arg	Ile	-	-	-	His	Met	Met	-	Glu	Pro	Val	Thr
TO-UFT-92930	Gln	Lys	-	-	-	-	-	Glu	Ser	Arg	Thr	Asp	Val	Thr	Lys	Glu	-	-	-	Thr	Arg	Thr	Val	-	-	-	Gly	-	-	Thr	Arg	-	Phe	-	-	Asp	Arg	Ile	-	Lys	Asn	-	-	-	-	Glu	Pro	Val	Thr
TO-UFT-12931	Gln	Lys	-	Lys	-	Val	-	-	Ser	Arg	Thr	Asp	Val	Thr	Lys	Glu	-	Ala	-	Thr	-	Thr	-	-	-	Ala	Gly	-	-	Thr	-	Val	-	Ile	Gly	Asp	Arg	Ile	-	-	-	His	Met	Met	-	Glu	Pro	Val	Thr
TO-UFT-82929	Gln	Lys	-	-	-	-	-	Glu	Ser	Arg	Thr	Asp	Val	Thr	Lys	Glu	-	-	-	Thr	Arg	Thr	Val	-	-	-	Gly	-	-	Thr	Arg	-	Phe	-	-	Asp	Arg	Ile	-	Lys	Asn	-	-	-	-	Glu	Pro	Val	Thr
TO-UFT-62929	Gln	Lys	-	Lys	-	Val	-	-	Ser	Arg	Thr	Asp	Val	Thr	Lys	Glu	-	Ala	-	Thr	-	Thr	-	-	-	Ala	Gly	-	-	Thr	-	Val	-	-	Gly	Asp	Arg	Ile	-	-	-	His	Met	Met	-	Glu	Pro	Val	Thr
UFT-TO-172929	Gln	Lys	Gly	-	-	-	-	Glu	Ser	Arg	Thr	Asp	Val	Thr	Lys	Glu	-	-	-	Thr	Arg	Thr	Val	-	-	-	Gly	-	-	Thr	Arg	-	Phe	-	-	Asp	Arg	Ile	-	Lys	Asn	-	-	-	-	Glu	Pro	Val	Thr
TO-UFT-32929	Gln	Lys	Gly	-	-	-	-	Glu	Ser	Arg	Thr	Asp	Val	Thr	Lys	Glu	-	-	-	Thr	Arg	Thr	Val	-	-	-	Gly	-	-	Thr	Arg	-	Phe	-	-	Asp	Arg	Ile	-	Lys	Asn	-	-	-	-	Glu	Pro	Val	Thr
UFT-TO-132929	Gln	Lys	Gly	Lys	-	Val	-	-	Ser	Arg	Thr	Asp	Val	Thr	Lys	Glu	-	Ala	-	Thr	-	Thr	-	-	-	Ala	Gly	-	-	Thr	-	Val	-	Ile	Gly	Asp	Arg	Ile	-	-	-	His	Met	Met	Lys	Glu	Pro	Val	Thr
TO-UFT-82956	Gln	Lys	-	Lys	-	Val	-	-	Ser	Arg	Thr	Asp	Val	Thr	Lys	Glu	-	Ala	-	Thr	-	Thr	-	-	-	Ala	Gly	-	-	Thr	-	Val	-	Ile	Gly	Asp	Arg	Ile	-	-	-	His	Met	Met	-	Glu	Pro	Val	Thr
UFT-TO-182929	Gln	Lys	-	-	-	-	-	Glu	Ser	Arg	Thr	Asp	Val	Thr	Lys	Glu	-	-	-	Thr	Arg	Thr	Val	-	-	-	Gly	-	-	Thr	Arg	-	Phe	-	-	Asp	Arg	Ile	-	Lys	Asn	-	-	-	-	Glu	Pro	Val	Thr
TO-UFT-72940	Gln	Lys	-	-	-	-	-	Glu	Ser	Arg	Thr	Asp	Val	Thr	Lys	Glu	-	-	-	Thr	Arg	Thr	Val	-	-	-	Gly	-	-	Thr	Arg	-	Phe	-	-	Asp	Arg	Ile	-	Lys	Asn	-	-	-	-	Glu	Pro	Val	Thr
TO-UFT-122971	Gln	Lys	-	Lys	-	Val	-	-	Ser	Arg	Thr	Asp	Val	Thr	Lys	Glu	-	Ala	-	Thr	-	Thr	-	-	-	Ala	Gly	-	-	Thr	-	Val	-	Ile	Gly	Asp	Arg	Ile	-	-	-	His	Met	Met	-	Glu	Pro	Val	Thr
TO-UFT-192971	Gln	Lys	-	-	Leu	-	-	Glu	Ser	Arg	Thr	Asp	Val	Thr	Lys	Glu	-	-	-	Thr	Arg	Thr	Val	-	-	-	Gly	-	-	Thr	Arg	-	Phe	-	-	Asp	Arg	Ile	-	Lys	Asn	-	-	-	-	Glu	Pro	Val	Thr
TO-UFT-32957	Gln	Lys	-	-	-	-	-	Glu	Ser	Arg	Thr	Asp	Val	Thr	Lys	Glu	-	-	Ile	Thr	Arg	Thr	Val	-	-	-	Gly	-	-	Thr	Arg	-	Phe	-	-	Asp	Arg	Ile	-	-	Asn	-	-	-	-	Glu	Pro	Val	Thr
UFT-TO-242929	Gln	Lys	Gly	-	-	-	-	Glu	Ser	Arg	Thr	Asp	Val	Thr	Lys	Glu	-	-	-	Thr	Arg	Thr	Val	-	-	-	Gly	-	-	Thr	Arg	-	Phe	-	-	Asp	Arg	Ile	-	Lys	Asn	-	-	-	-	Glu	Pro	Val	Thr
TO-UFT-22930	Gln	Lys	-	-	-	-	-	Glu	Ser	Arg	Thr	Asp	Val	Thr	Lys	Glu	-	-	-	Thr	Arg	Thr	Val	-	-	-	Gly	-	-	Thr	Arg	-	Phe	-	-	Asp	Arg	Ile	-	Lys	Asn	-	-	-	-	Glu	Pro	Val	Thr
TO-UFT-42930	Gln	Lys	-	-	-	-	-	Glu	Ser	Arg	Thr	Asp	Val	Thr	Lys	Glu	-	-	-	Thr	Arg	Thr	Val	-	-	-	Gly	-	-	Thr	Arg	-	Phe	-	-	Asp	Arg	Ile	-	Lys	Asn	-	-	-	-	Glu	Pro	Val	Thr
TO-UFT-52930	Gln	Lys	-	-	-	-	-	Glu	Ser	Arg	Thr	Asp	Val	Thr	Lys	Glu	-	-	-	Thr	Arg	Thr	Val	-	-	-	Gly	-	-	Thr	Arg	-	Phe	-	-	Asp	Arg	Ile	-	Lys	Asn	-	-	-	-	Glu	Pro	Val	Thr
TO-UFT-62930	Gln	Lys	-	-	-	-	-	Glu	Ser	Arg	Thr	Asp	Val	Thr	Lys	Glu	-	-	-	Thr	Arg	Thr	Val	-	-	-	Gly	-	-	Thr	Arg	-	Phe	-	-	Asp	Arg	Ile	-	Lys	Asn	-	-	-	-	Glu	Pro	Val	Thr
TO-UFT-62931	Gln	Lys	-	-	-	-	-	Glu	Ser	Arg	Thr	Asp	Val	Thr	Lys	Glu	-	-	-	Thr	Arg	Thr	Val	-	-	-	Gly	-	Leu	Thr	Arg	-	Phe	-	-	Asp	Arg	Ile	-	Lys	Asn	-	-	-	-	Glu	Pro	Val	Thr
TO-UFT-232957	Gln	Lys	-	Lys	-	Val	-	-	Ser	Arg	Thr	Asp	Val	Thr	Lys	Glu	-	Ala	-	Thr	-	Thr	-	-	-	Ala	Gly	-	-	Thr	-	Val	-	-	Gly	Asp	Arg	Ile	-	-	-	His	-	-	Lys	Glu	Pro	Val	Thr
TO-UFT-112931	Gln	Lys	-	-	-	-	-	Glu	Ser	Arg	Thr	Asp	Val	Thr	Lys	Glu	-	-	-	Thr	Arg	Thr	Val	-	-	-	Gly	-	-	Thr	Arg	-	Phe	-	-	Asp	Arg	Ile	-	Lys	Asn	-	-	-	-	Glu	Pro	Val	Thr
TO-UFT-152931	Gln	Lys	-	-	-	-	-	Glu	Ser	Arg	Thr	Asp	Val	Thr	Lys	Glu	-	-	-	Thr	Arg	Thr	Val	-	-	-	Gly	-	-	Thr	Arg	-	Phe	-	-	Asp	Arg	Ile	-	Lys	Asn	-	-	-	-	Glu	Pro	Val	Thr
TO-UFT-92940	Gln	Lys	-	-	-	-	-	Glu	Ser	Arg	Thr	Asp	Val	Thr	Lys	Glu	-	-	-	Thr	-	Thr	Val	-	-	-	Gly	-	-	Thr	Arg	-	Phe	-	-	Asp	Arg	Ile	-	Lys	Asn	-	-	-	-	Glu	Pro	Val	Thr
TO-UFT-42956	Gln	Lys	-	-	-	-	-	Glu	Ser	Arg	Thr	Asp	Val	Thr	Lys	Glu	-	-	-	Thr	Arg	Thr	Val	-	-	-	Gly	-	-	Thr	Arg	-	Phe	-	-	Asp	Arg	Ile	-	Lys	Asn	-	-	-	-	Glu	Pro	Val	Thr
TO-UFT-122956	Gln	Lys	-	-	-	-	-	-	Ser	Arg	Thr	Asp	Val	Thr	Lys	Glu	-	-	Ile	Thr	-	Thr	-	Val	Thr	-	Gly	-	-	Thr	-	-	-	-	-	Asp	Arg	Ile	Ile	-	-	-	-	-	-	Glu	Pro	Val	Thr
TO-UFT-142956	Gln	Lys	-	-	Leu	-	-	Glu	Ser	Arg	Thr	Asp	Val	Thr	Lys	Glu	-	-	-	Thr	Arg	Thr	Val	-	-	-	Gly	-	-	Thr	Arg	-	Phe	-	-	Asp	Arg	Ile	-	Lys	Asn	-	-	-	-	Glu	Pro	Val	Thr
TO-UFT-152956	Gln	Lys	-	-	-	-	-	Glu	Ser	Arg	Thr	Asp	Val	Thr	Lys	Glu	-	-	-	Thr	Arg	Thr	Val	-	-	-	Gly	-	-	Thr	Arg	-	Phe	-	-	Asp	Arg	Ile	-	Lys	Asn	-	-	-	-	Glu	Pro	Val	Thr
TO-UFT-162956	Gln	Lys	-	-	-	-	-	Glu	Ser	Arg	Thr	Asp	Val	Thr	Lys	Glu	-	-	-	Thr	Arg	Thr	Val	-	-	-	Gly	-	-	Thr	Arg	-	Phe	-	-	Asp	Arg	Ile	-	Lys	Asn	-	-	-	-	Glu	Pro	Val	Thr
TO-UFT-102972	Gln	Lys	-	-	-	-	-	Glu	Ser	Arg	Thr	Asp	Val	Thr	Lys	Glu	-	-	-	Thr	Arg	Thr	Val	-	-	-	Gly	Val	-	Thr	Arg	-	Phe	-	-	Asp	Arg	Ile	-	Lys	Asn	-	-	-	-	Glu	Pro	Val	Thr
TO-UFT-112972	Gln	Lys	-	-	-	-	-	Glu	Ser	Arg	Thr	Asp	Val	Thr	Lys	Glu	-	-	-	Thr	Arg	Thr	Val	-	-	-	Gly	-	-	Thr	Arg	-	Phe	-	-	Asp	Arg	Ile	-	Lys	Asn	-	-	-	-	Glu	Pro	Val	-
TO-UFT-122972	Gln	Lys	-	-	-	-	-	Glu	Ser	Arg	Thr	Asp	Val	Thr	Lys	Glu	-	-	-	Thr	Arg	Thr	Val	-	-	-	Gly	-	-	Thr	Arg	-	Phe	-	-	Asp	Arg	Ile	-	Lys	Asn	-	-	-	-	Glu	Pro	Val	Thr
TO-UFT-42972	Gln	Lys	-	-	-	-	-	Glu	Ser	Arg	Thr	Asp	Val	Thr	Lys	Glu	Thr	-	-	Thr	Arg	Thr	Val	-	-	-	Gly	-	-	Thr	Arg	-	Phe	-	-	Asp	Arg	Ile	-	Lys	Asn	-	-	-	-	Glu	Pro	Val	Thr
TO-UFT-72972	Gln	Lys	-	-	-	-	-	Glu	Ser	Arg	Thr	Asp	Val	Thr	Lys	Glu	-	-	-	Thr	Arg	Thr	Val	-	-	-	Gly	-	-	Thr	Arg	-	Phe	-	-	Asp	Arg	Ile	-	Lys	Asn	-	-	-	-	Glu	Pro	Val	Thr
TO-UFT-82972	Gln	Lys	-	-	-	-	-	Glu	Ser	Arg	Thr	Asp	Val	Thr	Lys	Glu	-	-	-	Thr	Arg	Thr	Val	-	-	-	Gly	-	-	Thr	Arg	-	Phe	-	-	Asp	Arg	Ile	-	Lys	Asn	-	-	-	-	Glu	Pro	Val	-
TO-UFT-92972	Gln	Lys	-	-	-	-	-	-	Ser	Arg	Thr	Asp	Val	Thr	Lys	Glu	-	-	Ile	Thr	-	Thr	-	Val	Thr	-	Gly	-	-	Thr	-	-	-	-	-	Asp	Arg	Ile	Ile	-	-	-	-	-	-	Glu	Pro	Val	Thr
TO-UFT-122979	Gln	Lys	-	-	-	-	-	Glu	Ser	Arg	Thr	Asp	Val	Thr	Lys	Glu	-	-	-	Thr	Arg	Thr	Val	-	-	-	Gly	-	-	Thr	Arg	-	Phe	-	-	Asp	Arg	Ile	-	Lys	Asn	-	-	-	-	Glu	Pro	Val	Thr
TO-UFT-172979	Gln	Lys	-	-	-	-	-	Glu	Ser	Arg	Thr	Asp	Val	Thr	Lys	Glu	-	-	-	Thr	Arg	Thr	Val	-	-	-	Gly	Val	-	Thr	Arg	-	Phe	-	-	Asp	Arg	Ile	-	Lys	Asn	-	-	-	-	Glu	Pro	Val	Thr
TO-UFT-242979	Gln	Lys	-	-	-	-	-	Glu	Ser	Arg	Thr	Asp	Val	Thr	Lys	Glu	-	-	-	Thr	Arg	Thr	Val	-	-	-	Gly	Val	-	Thr	Arg	-	Phe	-	-	Asp	Arg	Ile	-	Lys	Asn	-	-	-	-	Glu	Pro	Val	Thr
TO-UFT-92979	Gln	Lys	-	-	-	-	-	Glu	Ser	Arg	Thr	Asp	Val	Thr	Lys	Glu	-	-	-	Thr	Arg	Thr	Val	-	-	-	Gly	-	-	Thr	Arg	-	Phe	-	-	Asp	Arg	Ile	-	Lys	Asn	-	-	-	-	Glu	Pro	Val	Thr
TO-UFT-53522	Gln	Lys	-	-	-	-	-	Glu	Ser	Arg	Thr	Asp	Val	Thr	Lys	Glu	-	-	-	Thr	-	Thr	Val	-	-	-	Gly	Val	-	Thr	Arg	-	Phe	-	-	Asp	Arg	Ile	-	Lys	Asn	-	-	-	-	Glu	Pro	Val	Thr
TO-UFT-38522	-	-	Gly	Lys	-	-	-	-	Ser	Arg	Thr	Asp	Val	Thr	Lys	Glu	-	Ala	-	Thr	-	Thr	-	-	-	Ala	Gly	-	-	Thr	-	Val	-	Ile	Gly	Asp	Arg	Ile	-	-	-	His	Met	Met	-	Glu	Pro	Val	Thr
TO-UFT-80529	Gln	Lys	-	-	-	Val	-	Glu	Ser	Arg	Thr	Asp	Val	Thr	Lys	Glu	-	-	-	Thr	-	Thr	Val	-	-	-	Gly	-	-	Thr	Arg	-	Phe	-	-	Asp	Arg	Ile	-	Lys	Asn	-	-	-	-	Glu	Pro	Val	Thr
TO-UFT-87522	Gln	Lys	-	-	-	-	-	Glu	Ser	Arg	Thr	Asp	Val	Thr	Lys	Glu	-	-	Ile	Thr	-	Thr	Val	-	-	-	Gly	-	Leu	Thr	Arg	-	Phe	-	-	Asp	Arg	Ile	-	Lys	Asn	-	-	-	-	Glu	Pro	Val	Thr
TO-UFT-38606	Gln	Lys	-	-	-	-	-	Glu	Ser	Arg	Thr	Asp	Val	Thr	Lys	Glu	-	-	-	Thr	Arg	Thr	Val	-	-	-	Gly	-	Leu	Thr	Arg	-	Phe	-	-	Asp	Arg	Ile	-	Lys	Asn	-	-	-	-	Glu	Pro	Val	Thr
TO-UFT-18606	Gln	Lys	-	-	-	-	-	Glu	Ser	Arg	Thr	Asp	Val	Thr	Lys	Glu	-	-	-	Thr	Arg	Thr	Val	-	-	-	Gly	-	-	Thr	Arg	-	Phe	-	-	Asp	Arg	Ile	-	Lys	Asn	-	-	-	-	Glu	Pro	Val	Thr
TO-UFT-22606	Gln	Lys	-	-	-	-	-	Glu	Ser	Arg	Thr	Asp	Val	Thr	Lys	Glu	-	-	-	Thr	Arg	Thr	Val	-	-	-	Gly	-	-	Thr	Arg	-	Phe	-	-	Asp	Arg	Ile	-	Lys	Asn	-	-	-	-	Glu	Pro	Val	Thr
TO-UFT-24606	Gln	Lys	-	-	-	-	-	Glu	Ser	Arg	Thr	Asp	Val	Thr	Lys	Glu	-	-	-	Thr	Arg	Thr	Val	-	-	-	Gly	-	-	Thr	Arg	-	Phe	-	-	Asp	Arg	Ile	-	Lys	Asn	-	-	-	-	Glu	Pro	Val	Thr
TO-UFT-8606	Gln	Lys	-	-	-	-	-	Glu	Ser	Arg	Thr	Asp	Val	Thr	Lys	Glu	-	-	-	Thr	Arg	Thr	Val	-	-	-	Gly	-	-	Thr	Arg	-	Phe	-	-	Asp	Arg	Ile	-	Lys	Asn	-	-	-	-	Glu	Pro	Val	Thr
TO-UFT-90606	Gln	Lys	-	-	-	-	-	Glu	Ser	Arg	Thr	Asp	Val	Thr	Lys	Glu	-	-	-	Thr	Arg	Thr	Val	-	-	-	Gly	-	-	Thr	Arg	-	Phe	-	-	Asp	Arg	Ile	-	Lys	Asn	-	-	-	-	Glu	Pro	Val	Thr
TO-UFT-93606	Gln	Lys	-	-	-	-	-	Glu	Ser	Arg	Thr	Asp	Val	Thr	Lys	Glu	-	-	-	Thr	Arg	Thr	Val	-	-	-	Gly	-	Leu	Thr	Arg	-	Phe	-	-	Asp	Arg	Ile	-	Lys	Asn	-	-	-	-	Glu	Pro	Val	Thr
UFT-TO-94606	Gln	Lys	-	-	-	-	-	Glu	Ser	Arg	Thr	Asp	Val	Thr	Lys	Glu	-	-	-	Thr	Arg	Thr	Val	-	-	-	Gly	-	-	Thr	Arg	-	Phe	-	-	Asp	Arg	Ile	-	-	Asn	-	-	-	-	Glu	Pro	Val	Thr
TO-UFT-4017	Gln	Lys	-	-	-	-	-	Glu	Ser	Arg	Thr	Asp	Val	Thr	Lys	Glu	Thr	-	-	Thr	Arg	Thr	Val	-	-	-	Gly	Val	-	Thr	Arg	-	Phe	-	-	Asp	Arg	Ile	-	Lys	Asn	-	-	-	-	Glu	Pro	Val	Thr
TO-UFT-417	Gln	Lys	-	-	-	-	Ile	Glu	Ser	Arg	Thr	Asp	Val	Thr	Lys	Glu	Thr	-	-	Thr	-	Thr	Val	-	-	-	Gly	Val	-	Thr	Arg	-	Phe	-	-	Asp	Arg	Ile	-	Lys	Asn	-	-	-	-	Glu	Pro	Val	Thr
TO-UFT-717	Gln	Lys	-	-	-	-	Ile	Glu	Ser	Arg	Thr	Asp	Val	Thr	Lys	Glu	Thr	-	-	Thr	Arg	Thr	Val	-	-	-	Gly	Val	-	Thr	Arg	-	Phe	-	-	Asp	Arg	Ile	-	Lys	Asn	-	-	-	-	Glu	Pro	Val	Thr
TO-UFT-4547	Gln	Lys	-	-	-	-	-	Glu	Ser	Arg	Thr	Asp	Val	Thr	Lys	Glu	Thr	-	-	Thr	Arg	Thr	Val	-	-	-	Gly	Val	-	Thr	Arg	-	Phe	-	-	Asp	Arg	Ile	-	Lys	Asn	-	-	-	-	Glu	Pro	Val	Thr
[truncated: 73 more columns]
