# Supplementary material for: Circulation of Dengue Virus Serotype 1 genotype V and Dengue Virus Serotype 2 genotype III in Tocantins State, Northern Brazil, 2021-2022
Source: Preprints.org preprint supplement (doi:10.20944/preprints202309.1376.v1), 2023-09-20
Supplement: Supplementary file 11 [file Table S9.xlsx]

## Sheet: Table S9
Table S9 - Missense mutations found in the newly sequenced genomes of DENV-2 from Tocantins reported in this study.
Protein	anchored capsid protein		protein pr	envelope protein E								NS1		NS2A				NS2B	NS3						NS4A			NS4B			NS5
Sites (Protein)	106	112	81	6	91	129	131	170	340	363	380	61	153	38	51	116	186	94	61	115	186	549	561	567	23	36	41	15	18	156	254	271	276	335	388	429	514	521	523	553	558	586	637	644	670	874	895
OK469346	Ile	Ala	Ala	Met	Leu	Val	Leu	Ile	Met	Ser	Ile	Thr	Leu	Val	Arg	Ile	Gln	Ile	Lys	Leu	Lys	Arg	Arg	Ile	Asp	Ala	Tyr	Leu	Ile	Asp	Thr	Ile	Ile	Val	Lys	Ser	Lys	Asp	Ser	Val	Glu	Arg	Val	Gln	Leu	Ile	Glu
TO-UFT-2200	Val	Val	Thr	Ile	Ile	Ile	Gln	Thr	Thr	Ala	Val	Ala	Met	Leu	Lys	Leu	Arg	Thr	Arg	Ile	Arg	Lys	Lys	Val	Asn	Val	His	Phe	-	Glu	Pro	Val	Val	-	Glu	Gly	Arg	Glu	Gly	Ile	Lys	Lys	Ala	His	Ile	-	Lys
TO-UFT-2201	Val	Val	Thr	Ile	Ile	Ile	Gln	Thr	Thr	Ala	Val	Ala	Met	Leu	Lys	Leu	Arg	Thr	Arg	Ile	Arg	Lys	Lys	Val	Asn	Val	His	Phe	-	Glu	Pro	Val	Val	-	Glu	Gly	Arg	Glu	Gly	Ile	Lys	Lys	Ala	His	Ile	Val	Lys
TO-UFT-689	Val	Val	Thr	Ile	Ile	Ile	Gln	Thr	Thr	Ala	Val	Ala	Met	Leu	Lys	Leu	Arg	Thr	Arg	Ile	Arg	Lys	Lys	Val	Asn	Val	His	Phe	Thr	Glu	Pro	Val	Val	-	Glu	Gly	Arg	Glu	Gly	Ile	Lys	Lys	Ala	His	Ile	-	Lys
TO-UFT-6960	Val	Val	Thr	Ile	Ile	Ile	Gln	Thr	Thr	Ala	Val	Ala	Met	Leu	Lys	Leu	Arg	Thr	Arg	Ile	Arg	Lys	Lys	Val	Asn	Val	His	Phe	-	Glu	Pro	Val	Val	Ile	Glu	Gly	Arg	Glu	Gly	Ile	Lys	Lys	Ala	His	Ile	-	Lys
